# Supplementary material for: Identification and characterization of human ovary-derived circular RNAs and their potential roles in ovarian aging
Source: Aging (Albany NY). 2018 Sep 23;10(9):2511–34. doi: 10.18632/aging.101565 (PMC6188495; doi:10.18632/aging.101565)
Supplement: Supplementary Table S1 [file aging-10-101565-s002.xlsx]

## Sheet: 工作表1
Transcript ID	N25	N26	N28	N46	N45	N44	G1	G2	G2 vs G1 (log2 Fold Change)	G2 vs G1 P value	G2 vs G1 FDR	circRNA type	Transcript ID	Gene ID	Symbol	cirbase ID	cirbase chr	cirbase Start	cirbase End	cirbase strand
1:100007034|100017815	0	0	1.80575	1.71665	0	3.47417	0.601917	1.73027	1.12836	0.293732	0.921644	exon	ENST00000533028,ENST00000370153,ENST00000370155,ENST00000427993	ENSG00000117620	SLC35A3	hsa_circ_0013299	1	100007034	100017815	+
1:100011365|100017815	2.54748	0	1.41363	1.09988	0	0	1.32037	0.366626	-0.953747	0.435276	0.921644	exon	ENST00000533028,ENST00000370153,ENST00000370155,ENST00000427993	ENSG00000117620	SLC35A3	hsa_circ_0013300	1	100011365	100017815	+
1:100049909|100061949	0	2.62281	2.11375	1.44098	0	2.41525	1.57885	1.28541	-0.293443	0.815506	0.936233	exon	ENST00000370152	ENSG00000156875	MFSD14A	---	---	---	---	---
1:100049909|100068195	0	0	2.11375	0	0	0	0.704583	0	-0.704583	0.413185	0.921644	exon	ENST00000370152	ENSG00000156875	MFSD14A	---	---	---	---	---
1:100049909|100068586	0	0	1.80575	0	0	0	0.601917	0	-0.601917	0.475406	0.921644	exon	ENST00000370152	ENSG00000156875	MFSD14A	---	---	---	---	---
1:100049909|100069685	0	1.83985	3.08548	1.94801	0	3.47417	1.64178	1.80739	0.165614	0.859611	0.949944	exon	ENST00000370152	ENSG00000156875	MFSD14A	hsa_circ_0000096	1	100049909	100069685	+
1:100049909|100078548	0	0	0	1.09988	0	0	0	0.366626	0.366626	0.661625	0.921644	exon	ENST00000370152	ENSG00000156875	MFSD14A	---	---	---	---	---
1:100058666|100060005	0	0	0.873449	0	0	0	0.29115	0	-0.29115	0.69286	0.921644	exon	ENST00000370152	ENSG00000156875	MFSD14A	---	---	---	---	---
1:100058666|100061949	0	0	0.873449	0	0	0	0.29115	0	-0.29115	0.69286	0.921644	exon	ENST00000370152	ENSG00000156875	MFSD14A	---	---	---	---	---
1:100067977|100068586	0	0	0	0	0	1.95955	0	0.653185	0.653185	0.485036	0.921644	exon	ENST00000370152	ENSG00000156875	MFSD14A	---	---	---	---	---
1:100068473|100080659	0	0	0	0	0	1.28966	0	0.429887	0.429887	0.635324	0.921644	exon	ENST00000370152	ENSG00000156875	MFSD14A	---	---	---	---	---
1:10007570|10008274	0	1.83985	0	0	2.03388	3.03976	0.613285	1.69121	1.07793	0.476679	0.921644	exon	ENST00000315901,ENST00000294435	ENSG00000162444	RBP7	hsa_circ_0009682	1	10007570	10008274	+
1:100136882|100143209	1.38702	0	0	0	0	0	0.46234	0	-0.46234	0.58606	0.921644	exon	ENST00000482437,ENST00000370141	ENSG00000122435	TRMT13	---	---	---	---	---
1:100136882|100144143	2.08091	1.83985	0	0	2.03388	0	1.30692	0.677962	-0.628961	0.668274	0.921644	exon	ENST00000482437,ENST00000370141	ENSG00000122435	TRMT13	---	---	---	---	---
1:100139649|100144143	0	0	0	1.44098	0	0	0	0.480325	0.480325	0.5841	0.921644	exon	ENST00000482437,ENST00000370141	ENSG00000122435	TRMT13	---	---	---	---	---
1:100139712|100140181	2.08091	0	0	0	0	0	0.693638	0	-0.693638	0.429293	0.921644	intron	ENST00000482437,ENST00000370141,ENST00000370143,ENST00000370139	ENSG00000122435	TRMT13	---	---	---	---	---
1:100152385|100168594	1.38702	0	0	0	0	0	0.46234	0	-0.46234	0.58606	0.921644	exon	ENST00000342895,ENST00000370138,ENST00000370137,ENST00000620882	ENSG00000122477	LRRC39	---	---	---	---	---
1:100152385|100173370	1.38702	0	0	2.32244	0	0	0.46234	0.774146	0.311807	0.700562	0.921644	exon	ENST00000370138,ENST00000370137	ENSG00000122477	LRRC39	---	---	---	---	---
1:100156172|100173370	0	0	0	0	0	1.28966	0	0.429887	0.429887	0.635324	0.921644	exon	ENST00000370138,ENST00000370137	ENSG00000122477	LRRC39	---	---	---	---	---
1:100210694|100214983	0	0	0.873449	0	0	0	0.29115	0	-0.29115	0.69286	0.921644	exon	ENST00000370132,ENST00000370131	ENSG00000137992	DBT	---	---	---	---	---
1:100210694|100218747	0	0	0	1.09988	0	0	0	0.366626	0.366626	0.661625	0.921644	exon	ENST00000370132,ENST00000370131	ENSG00000137992	DBT	---	---	---	---	---
1:100214817|100216199	0	0	0	0.652309	0	0	0	0.217436	0.217436	0.781429	0.921644	exon	ENST00000370132,ENST00000370131	ENSG00000137992	DBT	---	---	---	---	---
1:100214817|100218747	1.38702	0	0	0	0	0	0.46234	0	-0.46234	0.58606	0.921644	exon	ENST00000370132,ENST00000370131	ENSG00000137992	DBT	---	---	---	---	---
1:100214817|100230914	1.38702	0	0	0	0	0	0.46234	0	-0.46234	0.58606	0.921644	exon	ENST00000370132,ENST00000370131	ENSG00000137992	DBT	---	---	---	---	---
1:100230733|100240884	0	0	0	0.652309	2.03388	0	0	0.895398	0.895398	0.435432	0.921644	exon	ENST00000370132,ENST00000370131	ENSG00000137992	DBT	---	---	---	---	---
1:100273394|100287203	0	1.83985	0.873449	1.71665	0	0	0.904434	0.572217	-0.332217	0.899322	0.968118	exon	ENST00000260563,ENST00000370128	ENSG00000137996	RTCA	hsa_circ_0013319	1	100273394	100287203	+
1:100377546|100390824	0	1.83985	0	0	0	0	0.613285	0	-0.613285	0.494453	0.921644	exon	ENST00000336454,ENST00000361544,ENST00000635056,ENST00000370124,ENST00000455467	ENSG00000079335	CDC14A	hsa_circ_0013323	1	100377546	100390824	+
1:100390732|100442996	0	1.83985	1.80575	3.17049	2.84602	0	1.2152	2.0055	0.790301	0.383197	0.921644	exon	ENST00000336454,ENST00000361544,ENST00000635056,ENST00000370124,ENST00000455467	ENSG00000079335	CDC14A	---	---	---	---	---
1:100390732|100455492	0	0	0	1.94801	4.04223	0	0	1.99675	1.99675	0.171512	0.921644	exon	ENST00000336454,ENST00000361544,ENST00000635056,ENST00000370124,ENST00000455467	ENSG00000079335	CDC14A	---	---	---	---	---
1:100390732|100468094	0	0	0	0	0	1.95955	0	0.653185	0.653185	0.485036	0.921644	exon	ENST00000336454,ENST00000361544,ENST00000635056,ENST00000370124	ENSG00000079335	CDC14A	---	---	---	---	---
1:100424222|100442996	2.89947	2.62281	3.08548	2.32244	3.3625	0	2.86925	1.89498	-0.974274	0.534456	0.921644	exon	ENST00000336454,ENST00000361544,ENST00000635056,ENST00000370124,ENST00000455467,ENST00000469387	ENSG00000079335	CDC14A	hsa_circ_0000097	1	100424222	100442996	+
1:100424222|100455492	1.38702	0	0	1.94801	0	0	0.46234	0.649335	0.186996	0.81536	0.9362	exon	ENST00000336454,ENST00000361544,ENST00000635056,ENST00000370124,ENST00000455467	ENSG00000079335	CDC14A	---	---	---	---	---
1:100424222|100468094	0	1.83985	0	0	0	1.28966	0.613285	0.429887	-0.183397	0.868635	0.953201	exon	ENST00000336454,ENST00000361544,ENST00000635056,ENST00000370124	ENSG00000079335	CDC14A	---	---	---	---	---
1:100439932|100462881	2.08091	1.83985	0	0	0	0	1.30692	0	-1.30692	0.245986	0.921644	exon	ENST00000336454,ENST00000361544,ENST00000635056,ENST00000370124	ENSG00000079335	CDC14A	---	---	---	---	---
1:100439932|100468094	2.08091	1.83985	0	0	2.84602	1.95955	1.30692	1.60186	0.294934	0.783651	0.923384	exon	ENST00000336454,ENST00000361544,ENST00000635056,ENST00000370124	ENSG00000079335	CDC14A	---	---	---	---	---
1:100455405|100462881	0	0	0.873449	0	0	0	0.29115	0	-0.29115	0.69286	0.921644	exon	ENST00000336454,ENST00000361544,ENST00000635056,ENST00000370124	ENSG00000079335	CDC14A	---	---	---	---	---
1:100484292|100498207	0	0	0	0	0	1.28966	0	0.429887	0.429887	0.635324	0.921644	exon	ENST00000336454,ENST00000361544,ENST00000635056	ENSG00000079335	CDC14A	---	---	---	---	---
1:100494818|100499262	0	2.62281	0	0	0	1.28966	0.874269	0.429887	-0.444382	0.620034	0.921644	exon	ENST00000336454,ENST00000361544,ENST00000635056	ENSG00000079335	CDC14A	hsa_circ_0013330	1	100494818	100499262	+
1:10072028|10095596	0	0	2.36742	0	0	0	0.789141	0	-0.789141	0.368163	0.921644	exon	ENST00000343090,ENST00000253251	ENSG00000130939	UBE4B	---	---	---	---	---
1:100723020|100724890	0	0	1.41363	0	0	0	0.471212	0	-0.471212	0.566201	0.921644	exon	ENST00000294728,ENST00000370115,ENST00000347652,ENST00000370119	ENSG00000162692	VCAM1	---	---	---	---	---
1:100896570|100974902	0	0	1.80575	0	0	0	0.601917	0	-0.601917	0.475406	0.921644	exon	ENST00000357650,ENST00000370112	ENSG00000162695	SLC30A7	---	---	---	---	---
11:33286413|33287511	10.2361	10.3627	9.91488	10.1818	10.3453	10.1076	10.1712	10.2116	0.0403617	0.952339	0.983054	exon	ENST00000525975,ENST00000303296,ENST00000379016,ENST00000456517	ENSG00000110422	HIPK3	hsa_circ_0000284	11	33286413	33287511	+
1:100911063|100921841	1.38702	0	1.41363	1.71665	0	3.8076	0.933551	1.84142	0.907866	0.209879	0.921644	exon	ENST00000357650,ENST00000370112	ENSG00000162695	SLC30A7	hsa_circ_0013348	1	100911063	100921841	+
1:100912112|100921841	0	0	1.41363	0	0	0	0.471212	0	-0.471212	0.566201	0.921644	exon	ENST00000357650,ENST00000370112	ENSG00000162695	SLC30A7	hsa_circ_0013351	1	100912112	100921841	+
1:100912112|100965918	0	0	1.80575	0	0	1.28966	0.601917	0.429887	-0.17203	0.840783	0.941209	exon	ENST00000357650,ENST00000370112	ENSG00000162695	SLC30A7	---	---	---	---	---
1:100913663|100921841	0	0	0.873449	2.61944	3.3625	2.41525	0.29115	2.79906	2.50791	0.0238109	0.921644	exon	ENST00000357650,ENST00000370112	ENSG00000162695	SLC30A7	hsa_circ_0013353	1	100913663	100921841	+
5:95755396|95763620	9.93175	9.97968	10.5171	9.94378	10.0948	10.5346	10.1428	10.1911	0.0482207	0.998583	0.999453	exon	ENST00000379982	ENSG00000164292	RHOBTB3	hsa_circ_0007444	5	95755396	95763620	+
1:10095461|10119613	0	0	0.873449	1.09988	2.03388	2.41525	0.29115	1.84967	1.55852	0.238583	0.921644	exon	ENST00000343090,ENST00000253251	ENSG00000130939	UBE4B	---	---	---	---	---
1:10095461|10122076	0	2.62281	0	0	0	2.41525	0.874269	0.805084	-0.0691853	0.955112	0.983054	exon	ENST00000343090,ENST00000253251	ENSG00000130939	UBE4B	---	---	---	---	---
1:10095461|10130813	0	0	0	0	2.03388	0	0	0.677962	0.677962	0.50093	0.921644	exon	ENST00000343090,ENST00000253251	ENSG00000130939	UBE4B	---	---	---	---	---
1:10095461|10135186	0	1.83985	0	0	0	0	0.613285	0	-0.613285	0.494453	0.921644	exon	ENST00000343090,ENST00000253251	ENSG00000130939	UBE4B	---	---	---	---	---
1:100995110|101021765	0	0	0	1.94801	0	0	0	0.649335	0.649335	0.47295	0.921644	exon	ENST00000481871,ENST00000466807,ENST00000488789,ENST00000370105,ENST00000342173,ENST00000488176,ENST00000490732,ENST00000370109,ENST00000477293,ENST00000464270,ENST00000498372	ENSG00000117543	DPH5	---	---	---	---	---
1:10101108|10119613	0	0	0	1.09988	0	0	0	0.366626	0.366626	0.661625	0.921644	exon	ENST00000343090,ENST00000253251	ENSG00000130939	UBE4B	---	---	---	---	---
1:10101108|10130813	0	0	0	0	2.84602	0	0	0.948672	0.948672	0.330659	0.921644	exon	ENST00000343090,ENST00000253251	ENSG00000130939	UBE4B	---	---	---	---	---
1:101072660|101075716	0	0	0	1.44098	0	0	0	0.480325	0.480325	0.5841	0.921644	exon	ENST00000454721	ENSG00000233184	RP11-421L21.3	---	---	---	---	---
1:10117459|10130813	0	0	1.41363	0	0	0	0.471212	0	-0.471212	0.566201	0.921644	exon	ENST00000343090,ENST00000253251,ENST00000475795	ENSG00000130939	UBE4B	---	---	---	---	---
1:10117459|10135186	2.08091	0	0	0	0	0	0.693638	0	-0.693638	0.429293	0.921644	exon	ENST00000343090,ENST00000253251	ENSG00000130939	UBE4B	hsa_circ_0007962	1	10117459	10135186	+
1:10117459|10145039	0	0	0.873449	0	0	0	0.29115	0	-0.29115	0.69286	0.921644	exon	ENST00000343090,ENST00000253251	ENSG00000130939	UBE4B	---	---	---	---	---
1:10117459|10147090	1.38702	0	0	0	0	0	0.46234	0	-0.46234	0.58606	0.921644	exon	ENST00000343090,ENST00000253251	ENSG00000130939	UBE4B	---	---	---	---	---
1:10121962|10130813	0	1.83985	0	0	0	0	0.613285	0	-0.613285	0.494453	0.921644	exon	ENST00000343090,ENST00000253251,ENST00000475795	ENSG00000130939	UBE4B	---	---	---	---	---
1:10121962|10135186	0	1.83985	0	0	0	0	0.613285	0	-0.613285	0.494453	0.921644	exon	ENST00000343090,ENST00000253251	ENSG00000130939	UBE4B	---	---	---	---	---
1:10126794|10130813	0	0	2.77067	0	0	0	0.923558	0	-0.923558	0.278376	0.921644	exon	ENST00000343090,ENST00000470736,ENST00000253251,ENST00000475795	ENSG00000130939	UBE4B	---	---	---	---	---
1:10126794|10132482	0	0	0	0	0	1.28966	0	0.429887	0.429887	0.635324	0.921644	exon	ENST00000343090,ENST00000470736,ENST00000253251	ENSG00000130939	UBE4B	---	---	---	---	---
1:10129392|10137205	0	2.62281	0	0	0	0	0.874269	0	-0.874269	0.339128	0.921644	exon	ENST00000343090,ENST00000470736,ENST00000253251	ENSG00000130939	UBE4B	---	---	---	---	---
1:10130500|10132482	2.08091	0	0	0	0	0	0.693638	0	-0.693638	0.429293	0.921644	exon	ENST00000343090,ENST00000253251,ENST00000466379	ENSG00000130939	UBE4B	---	---	---	---	---
1:10130500|10135186	0	0	0	1.94801	0	1.28966	0	1.07922	1.07922	0.350143	0.921644	exon	ENST00000343090,ENST00000253251,ENST00000466379	ENSG00000130939	UBE4B	---	---	---	---	---
1:10132369|10137205	1.38702	0	1.41363	2.32244	2.84602	0	0.933551	1.72282	0.789267	0.456565	0.921644	exon	ENST00000343090,ENST00000470736,ENST00000253251	ENSG00000130939	UBE4B	---	---	---	---	---
2:72718103|72733118	10.1131	10.2326	9.80645	9.69089	9.99333	9.84749	10.0507	9.8439	-0.20683	0.110774	0.921644	exon	ENST00000410112,ENST00000634650,ENST00000272427,ENST00000410104	ENSG00000144036	EXOC6B	hsa_circ_0009043	2	72718103	72733118	-
1:10146963|10161286	2.54748	0	0	0	0	1.95955	0.849161	0.653185	-0.195976	0.843867	0.942402	exon	ENST00000343090,ENST00000253251	ENSG00000130939	UBE4B	---	---	---	---	---
1:10149184|10161286	3.62148	0	1.41363	2.61944	0	1.95955	1.67837	1.52633	-0.152039	0.696128	0.921644	exon	ENST00000343090,ENST00000253251	ENSG00000130939	UBE4B	hsa_circ_0009701	1	10149184	10161286	+
1:10151326|10161286	0	0	0	2.14734	0	0	0	0.715779	0.715779	0.433375	0.921644	exon	ENST00000343090,ENST00000253251	ENSG00000130939	UBE4B	---	---	---	---	---
1:10158356|10168270	0	0	1.41363	0	0	0	0.471212	0	-0.471212	0.566201	0.921644	exon	ENST00000488228,ENST00000343090,ENST00000253251	ENSG00000130939	UBE4B	---	---	---	---	---
1:10168136|10171329	0	0	0	1.71665	0	0	0	0.572217	0.572217	0.523576	0.921644	exon	ENST00000343090,ENST00000253251	ENSG00000130939	UBE4B	---	---	---	---	---
1:10232250|10278128	1.38702	0	1.80575	1.44098	3.74203	1.95955	1.06426	2.38085	1.3166	0.235317	0.921644	exon	ENST00000263934,ENST00000377083,ENST00000377086,ENST00000377081,ENST00000377093	ENSG00000054523	KIF1B	---	---	---	---	---
1:10256247|10268263	1.38702	1.83985	0	2.47857	0	1.28966	1.07562	1.25608	0.180454	0.758975	0.921644	exon	ENST00000263934,ENST00000620295,ENST00000377083,ENST00000377086,ENST00000377081,ENST00000622724,ENST00000377093	ENSG00000054523	KIF1B	---	---	---	---	---
1:10256247|10272306	0	0	0	0	2.03388	0	0	0.677962	0.677962	0.50093	0.921644	exon	ENST00000263934,ENST00000620295,ENST00000377083,ENST00000377086,ENST00000377081,ENST00000622724,ENST00000377093	ENSG00000054523	KIF1B	---	---	---	---	---
1:10258493|10261970	0	0	0	1.09988	0	0	0	0.366626	0.366626	0.661625	0.921644	exon	ENST00000263934,ENST00000620295,ENST00000377083,ENST00000377086,ENST00000377081,ENST00000622724,ENST00000377093	ENSG00000054523	KIF1B	---	---	---	---	---
1:10258493|10268263	0	1.83985	1.41363	0	0	0	1.0845	0	-1.0845	0.338508	0.921644	exon	ENST00000263934,ENST00000620295,ENST00000377083,ENST00000377086,ENST00000377081,ENST00000622724,ENST00000377093	ENSG00000054523	KIF1B	hsa_circ_0009703	1	10258493	10268263	+
1:10258493|10272306	2.89947	0	0	0	0	1.95955	0.966489	0.653185	-0.313304	0.759871	0.921644	exon	ENST00000263934,ENST00000620295,ENST00000377083,ENST00000377086,ENST00000377081,ENST00000622724,ENST00000377093	ENSG00000054523	KIF1B	---	---	---	---	---
1:10258493|10276399	0	0	0	0	0	1.95955	0	0.653185	0.653185	0.485036	0.921644	exon	ENST00000263934,ENST00000620295,ENST00000377083,ENST00000377086,ENST00000377081,ENST00000622724,ENST00000377093	ENSG00000054523	KIF1B	---	---	---	---	---
1:10258493|10278128	1.38702	3.50067	0	1.44098	0	1.28966	1.62923	0.910213	-0.719016	0.368894	0.921644	exon	ENST00000263934,ENST00000620295,ENST00000377083,ENST00000377086,ENST00000377081,ENST00000622724,ENST00000377093	ENSG00000054523	KIF1B	---	---	---	---	---
1:10258493|10291161	2.08091	0	0	0	0	0	0.693638	0	-0.693638	0.429293	0.921644	exon	ENST00000263934,ENST00000620295,ENST00000377083,ENST00000377086,ENST00000377081,ENST00000622724,ENST00000377093	ENSG00000054523	KIF1B	---	---	---	---	---
1:10261905|10272306	1.38702	3.50067	2.36742	1.09988	0	0	2.41837	0.366626	-2.05174	0.0612713	0.921644	exon	ENST00000263934,ENST00000620295,ENST00000377083,ENST00000377086,ENST00000377081,ENST00000622724,ENST00000377093	ENSG00000054523	KIF1B	---	---	---	---	---
1:10261905|10278128	0	0	0	1.71665	0	0	0	0.572217	0.572217	0.523576	0.921644	exon	ENST00000263934,ENST00000620295,ENST00000377083,ENST00000377086,ENST00000377081,ENST00000622724,ENST00000377093	ENSG00000054523	KIF1B	---	---	---	---	---
1:10261905|10282533	0	0	0	1.44098	0	0	0	0.480325	0.480325	0.5841	0.921644	exon	ENST00000263934,ENST00000620295,ENST00000377083,ENST00000377086,ENST00000377081,ENST00000622724,ENST00000377093	ENSG00000054523	KIF1B	---	---	---	---	---
1:10267380|10268263	2.54748	2.62281	2.58309	2.86562	0	3.27325	2.58446	2.04629	-0.538168	0.952734	0.983054	exon	ENST00000263934,ENST00000620295,ENST00000377083,ENST00000377086,ENST00000377081,ENST00000622724,ENST00000377093	ENSG00000054523	KIF1B	hsa_circ_0002002	1	10267380	10268263	+
1:10267380|10272306	2.54748	0	0	2.47857	2.84602	0	0.849161	1.77486	0.925702	0.698696	0.921644	exon	ENST00000263934,ENST00000620295,ENST00000377083,ENST00000377086,ENST00000377081,ENST00000622724,ENST00000377093	ENSG00000054523	KIF1B	---	---	---	---	---
1:10267380|10282533	0	1.83985	0	1.09988	0	0	0.613285	0.366626	-0.246659	0.840168	0.941209	exon	ENST00000263934,ENST00000620295,ENST00000377083,ENST00000377086,ENST00000377081,ENST00000622724,ENST00000377093	ENSG00000054523	KIF1B	---	---	---	---	---
1:10267380|10291161	0	0	0	2.61944	0	1.28966	0	1.30304	1.30304	0.211514	0.921644	exon	ENST00000263934,ENST00000620295,ENST00000377083,ENST00000377086,ENST00000377081,ENST00000622724,ENST00000377093	ENSG00000054523	KIF1B	---	---	---	---	---
1:10271502|10276399	0	0	2.11375	0	0	0	0.704583	0	-0.704583	0.413185	0.921644	exon	ENST00000263934,ENST00000620295,ENST00000377083,ENST00000377086,ENST00000377081,ENST00000622724,ENST00000377093	ENSG00000054523	KIF1B	---	---	---	---	---
1:10271502|10278128	0	1.83985	0.873449	0	0	0	0.904434	0	-0.904434	0.404147	0.921644	exon	ENST00000263934,ENST00000620295,ENST00000377083,ENST00000377086,ENST00000377081,ENST00000622724,ENST00000377093	ENSG00000054523	KIF1B	---	---	---	---	---
1:10271502|10282533	0	0	0	2.61944	0	0	0	0.873148	0.873148	0.343453	0.921644	exon	ENST00000263934,ENST00000620295,ENST00000377083,ENST00000377086,ENST00000377081,ENST00000622724,ENST00000377093	ENSG00000054523	KIF1B	hsa_circ_0009706	1	10271502	10282533	+
1:10271502|10291161	0	2.62281	0	0	0	0	0.874269	0	-0.874269	0.339128	0.921644	exon	ENST00000263934,ENST00000620295,ENST00000377083,ENST00000377086,ENST00000377081,ENST00000622724,ENST00000377093	ENSG00000054523	KIF1B	---	---	---	---	---
1:10275428|10278128	0	0	0.873449	0	0	0	0.29115	0	-0.29115	0.69286	0.921644	exon	ENST00000263934,ENST00000620295,ENST00000377083,ENST00000377086,ENST00000377081,ENST00000622724,ENST00000377093	ENSG00000054523	KIF1B	---	---	---	---	---
13:32517857|32527532	10.0375	10.1694	9.78212	9.81144	9.97126	9.80619	9.99635	9.86296	-0.133385	0.243198	0.921644	exon	ENST00000446957,ENST00000357505,ENST00000511143,ENST00000267068,ENST00000399396,ENST00000504114,ENST00000505213	ENSG00000244754	N4BP2L2	hsa_circ_0000471	13	32517857	32527532	-
1:10275428|10292122	0	1.83985	0.873449	0.652309	0	0	0.904434	0.217436	-0.686998	0.589593	0.921644	exon	ENST00000263934,ENST00000620295,ENST00000377083,ENST00000377086,ENST00000377081,ENST00000622724,ENST00000377093	ENSG00000054523	KIF1B	---	---	---	---	---
1:10291082|10295766	0	1.83985	0	0	0	0	0.613285	0	-0.613285	0.494453	0.921644	exon	ENST00000263934,ENST00000620295,ENST00000377083,ENST00000377086,ENST00000377081,ENST00000622724,ENST00000377093	ENSG00000054523	KIF1B	---	---	---	---	---
1:10291082|10297246	0	3.1275	0.873449	0	0	0	1.33365	0	-1.33365	0.240567	0.921644	exon	ENST00000263934,ENST00000620295,ENST00000377083,ENST00000377086,ENST00000377081,ENST00000622724,ENST00000377093	ENSG00000054523	KIF1B	---	---	---	---	---
1:10292047|10297246	1.38702	0	0	1.71665	0	0	0.46234	0.572217	0.109878	0.884168	0.960332	exon	ENST00000263934,ENST00000620295,ENST00000377083,ENST00000377086,ENST00000377081,ENST00000622724,ENST00000377093	ENSG00000054523	KIF1B	---	---	---	---	---
1:10295086|10297246	0	2.62281	0	0	2.84602	0	0.874269	0.948672	0.0744028	0.968317	0.98778	exon	ENST00000263934,ENST00000620295,ENST00000377083,ENST00000377086,ENST00000377081,ENST00000622724,ENST00000377093	ENSG00000054523	KIF1B	---	---	---	---	---
1:10320043|10324895	1.38702	0	2.36742	0	0	1.95955	1.25148	0.653185	-0.598296	0.690163	0.921644	exon	ENST00000263934,ENST00000620295,ENST00000377086,ENST00000377081,ENST00000622724	ENSG00000054523	KIF1B	---	---	---	---	---
1:10320043|10343287	2.08091	0	0	0	2.03388	0	0.693638	0.677962	-0.0156767	0.931041	0.977227	exon	ENST00000263934,ENST00000620295,ENST00000377086,ENST00000377081,ENST00000622724	ENSG00000054523	KIF1B	hsa_circ_0009709	1	10320043	10343287	+
1:10320043|10371262	0	0	0	0	0	1.28966	0	0.429887	0.429887	0.635324	0.921644	exon	ENST00000263934,ENST00000620295,ENST00000377086,ENST00000377081,ENST00000622724	ENSG00000054523	KIF1B	---	---	---	---	---
1:10323884|10334638	2.08091	0	0	0	0	0	0.693638	0	-0.693638	0.429293	0.921644	exon	ENST00000263934,ENST00000620295,ENST00000377086,ENST00000377081,ENST00000622724	ENSG00000054523	KIF1B	---	---	---	---	---
1:10334520|10343287	0	0	0	0	0	1.95955	0	0.653185	0.653185	0.485036	0.921644	exon	ENST00000263934,ENST00000620295,ENST00000377086,ENST00000377081,ENST00000622724	ENSG00000054523	KIF1B	---	---	---	---	---
1:10334520|10345953	1.38702	0	0	0	0	0	0.46234	0	-0.46234	0.58606	0.921644	exon	ENST00000263934,ENST00000620295,ENST00000377086,ENST00000377081,ENST00000622724	ENSG00000054523	KIF1B	---	---	---	---	---
1:10336657|10348733	1.38702	0	0	0	0	0	0.46234	0	-0.46234	0.58606	0.921644	exon	ENST00000263934,ENST00000620295,ENST00000377086,ENST00000377081,ENST00000622724	ENSG00000054523	KIF1B	---	---	---	---	---
1:10339769|10363344	0	1.83985	0	0	0	0	0.613285	0	-0.613285	0.494453	0.921644	exon	ENST00000263934,ENST00000620295,ENST00000377086,ENST00000377081,ENST00000622724	ENSG00000054523	KIF1B	---	---	---	---	---
1:10342050|10345953	2.08091	0	0	0	0	0	0.693638	0	-0.693638	0.429293	0.921644	exon	ENST00000263934,ENST00000620295,ENST00000377086,ENST00000377081,ENST00000622724	ENSG00000054523	KIF1B	---	---	---	---	---
1:10342050|10348733	0	0	1.41363	0	0	0	0.471212	0	-0.471212	0.566201	0.921644	exon	ENST00000263934,ENST00000620295,ENST00000377086,ENST00000377081,ENST00000622724	ENSG00000054523	KIF1B	---	---	---	---	---
1:10345845|10348733	0	2.62281	2.77067	1.44098	0	0	1.79783	0.480325	-1.3175	0.268968	0.921644	exon	ENST00000465635,ENST00000263934,ENST00000620295,ENST00000377086,ENST00000483340,ENST00000377081,ENST00000622724	ENSG00000054523	KIF1B	---	---	---	---	---
1:10347761|10348733	0	0	0	0	0	2.41525	0	0.805084	0.805084	0.395572	0.921644	exon	ENST00000465635,ENST00000263934,ENST00000620295,ENST00000377086,ENST00000483340,ENST00000377081,ENST00000622724	ENSG00000054523	KIF1B	hsa_circ_0009711	1	10347761	10348733	+
1:103527695|103536194	1.38702	0	0.873449	1.09988	0	0	0.753489	0.366626	-0.386864	0.814735	0.9362	exon	ENST00000524631,ENST00000423855,ENST00000533099,ENST00000527062	ENSG00000185946	RNPC3	---	---	---	---	---
1:103527695|103551073	0	0	1.41363	0	0	0	0.471212	0	-0.471212	0.566201	0.921644	exon	ENST00000524631,ENST00000423855,ENST00000533099	ENSG00000185946	RNPC3	---	---	---	---	---
1:103555034|103575540	0	0	1.41363	0	0	0	0.471212	0	-0.471212	0.566201	0.921644	exon	ENST00000361355,ENST00000477657	ENSG00000240038	AMY2B	---	---	---	---	---
9:16727797|16738485	9.83556	9.99799	9.88979	9.69487	10.0534	9.85201	9.90778	9.86676	-0.0410231	0.573574	0.921644	exon	ENST00000617779,ENST00000484726,ENST00000380672	ENSG00000173068	BNC2	hsa_circ_0008732	9	16727797	16738485	-
1:103565435|103577845	0	0	0	0.652309	0	0	0	0.217436	0.217436	0.781429	0.921644	exon	ENST00000361355	ENSG00000240038	AMY2B	---	---	---	---	---
1:10363283|10365648	2.54748	0	0	2.47857	3.3625	3.03976	0.849161	2.96028	2.11112	0.145998	0.921644	exon	ENST00000263934,ENST00000620295,ENST00000377086,ENST00000377081,ENST00000622724,ENST00000635499	ENSG00000054523	KIF1B	hsa_circ_0009716	1	10363283	10365648	+
1:10363283|10371262	0	0	0	1.09988	0	0	0	0.366626	0.366626	0.661625	0.921644	exon	ENST00000263934,ENST00000620295,ENST00000377086,ENST00000377081,ENST00000622724,ENST00000635499	ENSG00000054523	KIF1B	---	---	---	---	---
1:10365100|10365648	0	1.83985	1.80575	1.09988	0	3.6505	1.2152	1.58346	0.368256	0.447774	0.921644	exon	ENST00000263934,ENST00000620295,ENST00000377086,ENST00000377081,ENST00000622724,ENST00000635499	ENSG00000054523	KIF1B	hsa_circ_0009718	1	10365100	10365648	+
1:10371141|10375373	0	2.62281	0.873449	1.94801	0	0	1.16542	0.649335	-0.516084	0.743399	0.921644	exon	ENST00000263934,ENST00000620295,ENST00000377086,ENST00000377081,ENST00000622724,ENST00000635499	ENSG00000054523	KIF1B	hsa_circ_0009721	1	10371141	10375373	+
1:10403071|10408140	0	1.83985	0	0.652309	0	0	0.613285	0.217436	-0.395848	0.717705	0.921644	exon	ENST00000465632,ENST00000270776,ENST00000491493	ENSG00000142657	PGD	---	---	---	---	---
1:10403071|10413251	0	0	0	1.44098	0	0	0	0.480325	0.480325	0.5841	0.921644	exon	ENST00000270776	ENSG00000142657	PGD	hsa_circ_0009726	1	10403071	10413251	+
1:10404161|10408140	0	0	0	0.652309	0	0	0	0.217436	0.217436	0.781429	0.921644	exon	ENST00000465632,ENST00000460189,ENST00000270776,ENST00000491493	ENSG00000142657	PGD	hsa_circ_0009728	1	10404161	10408140	+
1:10404161|10413251	0	0	0.873449	0	0	0	0.29115	0	-0.29115	0.69286	0.921644	exon	ENST00000460189,ENST00000270776	ENSG00000142657	PGD	hsa_circ_0009729	1	10404161	10413251	+
1:10411418|10413251	0	0	0	0	0	1.95955	0	0.653185	0.653185	0.485036	0.921644	exon	ENST00000460189,ENST00000270776,ENST00000483936	ENSG00000142657	PGD	hsa_circ_0009732	1	10411418	10413251	+
1:10433842|10442441	3.1822	1.83985	1.41363	0	0	2.41525	2.14523	0.805084	-1.34014	0.401301	0.921644	exon	ENST00000309048,ENST00000602787	ENSG00000175279,ENSG00000251503	APITD1,APITD1-CORT	hsa_circ_0000015	1	10433842	10442441	+
1:10440347|10442441	2.08091	2.62281	1.41363	1.71665	0	1.95955	2.03912	1.2254	-0.813717	0.607434	0.921644	exon	ENST00000462462,ENST00000464507,ENST00000309048,ENST00000602787	ENSG00000175279,ENSG00000251503	APITD1,APITD1-CORT	hsa_circ_0006905	1	10440347	10442441	+
1:10467190|10469338	0	1.83985	2.77067	0.652309	2.84602	0	1.53684	1.16611	-0.370734	0.755912	0.921644	exon	ENST00000377036,ENST00000476658,ENST00000377038	ENSG00000160049	DFFA	hsa_circ_0008936	1	10467190	10469338	-
1:107324282|107324922	2.08091	1.83985	0.873449	0	3.74203	3.03976	1.59807	2.2606	0.662525	0.30962	0.921644	exon	ENST00000370067,ENST00000370073,ENST00000370065,ENST00000370071,ENST00000294649,ENST00000370074,ENST00000370066,ENST00000477948,ENST00000370068	ENSG00000162631	NTNG1	hsa_circ_0002286	1	107324282	107324922	+
1:107596212|107617632	0	0	0	1.94801	0	0	0	0.649335	0.649335	0.47295	0.921644	exon	ENST00000527011,ENST00000343258,ENST00000370056,ENST00000525460,ENST00000415432,ENST00000529413	ENSG00000134215	VAV3	---	---	---	---	---
1:107596212|107642755	0	0	0	0	0	2.76104	0	0.920346	0.920346	0.321336	0.921644	exon	ENST00000527011,ENST00000343258,ENST00000370056,ENST00000525460,ENST00000415432,ENST00000529413	ENSG00000134215	VAV3	---	---	---	---	---
1:107642619|107705061	0	0	0	1.09988	0	0	0	0.366626	0.366626	0.661625	0.921644	exon	ENST00000527011,ENST00000343258,ENST00000370056,ENST00000529809	ENSG00000134215	VAV3	---	---	---	---	---
1:107683488|107705061	0	1.83985	0	0	0	2.76104	0.613285	0.920346	0.307061	0.749074	0.921644	exon	ENST00000490388,ENST00000527011,ENST00000343258,ENST00000370056,ENST00000469325	ENSG00000134215	VAV3	---	---	---	---	---
1:107766447|107779492	1.38702	0	0	0	0	0	0.46234	0	-0.46234	0.58606	0.921644	exon	ENST00000490388,ENST00000527011,ENST00000343258,ENST00000370056,ENST00000469325	ENSG00000134215	VAV3	---	---	---	---	---
1:108139058|108161293	0	0	1.80575	0	0	0	0.601917	0	-0.601917	0.475406	0.921644	exon	ENST00000370041,ENST00000264128,ENST00000565488	ENSG00000085491	SLC25A24	---	---	---	---	---
1:108143543|108161293	0	0	0	1.09988	0	0	0	0.366626	0.366626	0.661625	0.921644	exon	ENST00000370041,ENST00000264128,ENST00000565488	ENSG00000085491	SLC25A24	hsa_circ_0013370	1	108143543	108161293	-
10:115120185|115129535	9.33796	10.0794	8.94953	8.74547	9.53278	9.82239	9.45562	9.36688	-0.0887355	0.742735	0.921644	exon	ENST00000526946,ENST00000616894,ENST00000527407,ENST00000355044,ENST00000609571	ENSG00000107518	ATRNL1	hsa_circ_0020093	10	115120185	115129535	+
1:108154983|108161293	0	3.50067	0	0	0	1.28966	1.16689	0.429887	-0.737002	0.4866	0.921644	exon	ENST00000370041,ENST00000264128,ENST00000565488	ENSG00000085491	SLC25A24	hsa_circ_0013372	1	108154983	108161293	-
1:108154983|108182028	0	1.83985	1.41363	1.94801	2.03388	0	1.0845	1.3273	0.242801	0.839415	0.941209	exon	ENST00000370041,ENST00000565488	ENSG00000085491	SLC25A24	---	---	---	---	---
1:108154983|108185954	2.08091	1.83985	0	2.74778	0	0	1.30692	0.915926	-0.390997	0.957089	0.983054	exon	ENST00000370041,ENST00000264128,ENST00000565488	ENSG00000085491	SLC25A24	---	---	---	---	---
1:108181941|108185954	0	0	2.11375	0	2.84602	0	0.704583	0.948672	0.244089	0.861452	0.950934	exon	ENST00000370041,ENST00000565488	ENSG00000085491	SLC25A24	---	---	---	---	---
1:108624645|108629657	0	1.83985	1.80575	0.652309	2.03388	0	1.2152	0.895398	-0.319804	0.780211	0.921644	exon	ENST00000370035,ENST00000405454	ENSG00000162636	FAM102B	---	---	---	---	---
1:108628167|108629657	0	0	0	0.652309	3.3625	0	0	1.33827	1.33827	0.260048	0.921644	exon	ENST00000483371,ENST00000370035,ENST00000405454	ENSG00000162636	FAM102B	---	---	---	---	---
1:108650211|108657579	0	3.50067	0	1.71665	0	0	1.16689	0.572217	-0.594672	0.593441	0.921644	exon	ENST00000370032,ENST00000493676,ENST00000370031,ENST00000402983,ENST00000420055	ENSG00000162639	HENMT1	---	---	---	---	---
1:108650211|108659962	0	0	0.873449	1.71665	0	0	0.29115	0.572217	0.281068	0.768855	0.921644	exon	ENST00000370032,ENST00000370031,ENST00000402983,ENST00000420055	ENSG00000162639	HENMT1	---	---	---	---	---
1:108654716|108657579	0	0	0	1.09988	0	0	0	0.366626	0.366626	0.661625	0.921644	exon	ENST00000370032,ENST00000493676,ENST00000370031,ENST00000402983,ENST00000420055	ENSG00000162639	HENMT1	---	---	---	---	---
1:108730674|108733532	0	1.83985	0	1.44098	0	0	0.613285	0.480325	-0.132959	0.929157	0.977053	exon	ENST00000445274,ENST00000370017	ENSG00000143107	FNDC7	---	---	---	---	---
1:108752257|108760085	2.54748	3.1275	0	2.32244	2.84602	0	1.89166	1.72282	-0.168843	0.862955	0.951929	exon	ENST00000370008	ENSG00000116266	STXBP3	hsa_circ_0013382	1	108752257	108760085	+
1:108753063|108772819	1.38702	1.83985	0	0	0	0	1.07562	0	-1.07562	0.350129	0.921644	exon	ENST00000370008	ENSG00000116266	STXBP3	---	---	---	---	---
1:108753063|108776423	0	0	0	0.652309	0	0	0	0.217436	0.217436	0.781429	0.921644	exon	ENST00000370008	ENSG00000116266	STXBP3	---	---	---	---	---
5:154033791|154034967	9.29779	9.1113	9.48325	9.46445	9.40688	9.72724	9.29745	9.53286	0.23541	0.288122	0.921644	exon	ENST00000522858,ENST00000523705,ENST00000351797,ENST00000520667,ENST00000520313,ENST00000522395	ENSG00000055147	FAM114A2	hsa_circ_0001546	5	154033791	154034967	-
1:108782422|108796726	1.38702	3.1275	0.873449	1.09988	2.84602	0	1.79599	1.3153	-0.480693	0.705411	0.921644	exon	ENST00000370008	ENSG00000116266	STXBP3	---	---	---	---	---
1:108782649|108796372	0	1.83985	0	0	0	0	0.613285	0	-0.613285	0.494453	0.921644	exon	ENST00000370008	ENSG00000116266	STXBP3	---	---	---	---	---
1:108793582|108796726	0	2.62281	0	0.652309	2.84602	0	0.874269	1.16611	0.291839	0.921104	0.977053	exon	ENST00000370008	ENSG00000116266	STXBP3	hsa_circ_0000100	1	108793582	108796726	+
1:108793582|108798237	0	1.83985	0	0	0	0	0.613285	0	-0.613285	0.494453	0.921644	exon	ENST00000370008	ENSG00000116266	STXBP3	---	---	---	---	---
1:108793582|108800305	3.62148	0	2.11375	1.71665	3.3625	0	1.91174	1.69305	-0.218695	0.799452	0.931732	exon	ENST00000370008	ENSG00000116266	STXBP3	---	---	---	---	---
1:108796234|108798237	0	1.83985	0	0	0	0	0.613285	0	-0.613285	0.494453	0.921644	exon	ENST00000370008	ENSG00000116266	STXBP3	---	---	---	---	---
1:108798145|108807549	0	0	0	0.652309	0	0	0	0.217436	0.217436	0.781429	0.921644	exon	ENST00000370008	ENSG00000116266	STXBP3	---	---	---	---	---
1:108901790|108914408	2.08091	0	0	0	0	0	0.693638	0	-0.693638	0.429293	0.921644	exon	ENST00000406462,ENST00000264126	ENSG00000121957	GPSM2	---	---	---	---	---
1:108914338|108922576	0	1.83985	0	0	0	0	0.613285	0	-0.613285	0.494453	0.921644	exon	ENST00000406462,ENST00000264126	ENSG00000121957	GPSM2	---	---	---	---	---
1:108939636|108944057	2.08091	2.62281	0.873449	3.25931	3.3625	0	1.85906	2.20727	0.34821	0.46513	0.921644	exon	ENST00000356970	ENSG00000121940	CLCC1	hsa_circ_0013398	1	108939636	108944057	-
1:108939636|108950448	0	1.83985	0	0	0	0	0.613285	0	-0.613285	0.494453	0.921644	exon	ENST00000369968,ENST00000369970,ENST00000356970,ENST00000302500,ENST00000348264,ENST00000369969	ENSG00000121940	CLCC1	---	---	---	---	---
1:108943475|108950448	0	0	0	1.44098	0	0	0	0.480325	0.480325	0.5841	0.921644	exon	ENST00000369970,ENST00000356970	ENSG00000121940	CLCC1	hsa_circ_0013400	1	108943475	108950448	-
1:108943836|108950448	2.08091	0	0	0	0	0	0.693638	0	-0.693638	0.429293	0.921644	exon	ENST00000369970,ENST00000356970,ENST00000369976	ENSG00000121940	CLCC1	---	---	---	---	---
1:108947611|108950448	0	0	0	0	2.03388	0	0	0.677962	0.677962	0.50093	0.921644	exon	ENST00000369968,ENST00000369970,ENST00000356970,ENST00000369976,ENST00000302500,ENST00000348264,ENST00000369969	ENSG00000121940	CLCC1	hsa_circ_0013401	1	108947611	108950448	-
1:108981733|108986680	0	0	0	1.09988	0	0	0	0.366626	0.366626	0.661625	0.921644	exon	ENST00000357672,ENST00000361054,ENST00000369965,ENST00000369962,ENST00000400794	ENSG00000085433	WDR47	---	---	---	---	---
1:108981733|108995837	0	0	0	1.44098	0	0	0	0.480325	0.480325	0.5841	0.921644	exon	ENST00000357672,ENST00000361054,ENST00000369965,ENST00000369962,ENST00000400794	ENSG00000085433	WDR47	---	---	---	---	---
1:108981733|109004718	0	0	1.41363	0	0	1.95955	0.471212	0.653185	0.181973	0.85923	0.949777	exon	ENST00000369965,ENST00000400794	ENSG00000085433	WDR47	hsa_circ_0013403	1	108981733	109004718	-
1:108982609|108986680	0	0	0	1.71665	0	0	0	0.572217	0.572217	0.523576	0.921644	exon	ENST00000357672,ENST00000361054,ENST00000369965,ENST00000369962,ENST00000400794	ENSG00000085433	WDR47	---	---	---	---	---
1:108982609|109004715	0	0	0	0	2.03388	1.28966	0	1.10785	1.10785	0.373121	0.921644	exon	ENST00000357672,ENST00000361054,ENST00000369965,ENST00000369962,ENST00000400794	ENSG00000085433	WDR47	---	---	---	---	---
1:108982609|109004718	0	0	0	0.652309	0	0	0	0.217436	0.217436	0.781429	0.921644	exon	ENST00000369965,ENST00000400794	ENSG00000085433	WDR47	---	---	---	---	---
1:108982609|109011718	0	0	1.41363	0	0	0	0.471212	0	-0.471212	0.566201	0.921644	exon	ENST00000357672,ENST00000361054,ENST00000369965,ENST00000369962,ENST00000400794	ENSG00000085433	WDR47	---	---	---	---	---
1:108986523|109004715	0	0	2.11375	0	2.03388	0	0.704583	0.677962	-0.0266218	0.90071	0.968118	exon	ENST00000357672,ENST00000361054,ENST00000369965,ENST00000369962,ENST00000400794	ENSG00000085433	WDR47	---	---	---	---	---
1:108991254|109004715	0	0	1.41363	1.71665	0	0	0.471212	0.572217	0.101006	0.908401	0.971481	exon	ENST00000357672,ENST00000361054,ENST00000369965,ENST00000369962,ENST00000400794	ENSG00000085433	WDR47	hsa_circ_0013404	1	108991254	109004715	-
1:108991254|109004718	2.89947	1.83985	1.80575	0	2.03388	1.95955	2.18169	1.33115	-0.850545	0.482678	0.921644	exon	ENST00000369965,ENST00000400794	ENSG00000085433	WDR47	---	---	---	---	---
1:109002224|109004715	0	0	2.11375	0.652309	4.04223	0	0.704583	1.56485	0.860264	0.501257	0.921644	exon	ENST00000357672,ENST00000361054,ENST00000369965,ENST00000369962,ENST00000400794	ENSG00000085433	WDR47	---	---	---	---	---
1:109002224|109004718	0	1.83985	0	1.09988	2.03388	0	0.613285	1.04459	0.431302	0.811549	0.935584	exon	ENST00000369965,ENST00000400794	ENSG00000085433	WDR47	---	---	---	---	---
1:109002224|109011718	0	0	0	1.94801	0	1.28966	0	1.07922	1.07922	0.350143	0.921644	exon	ENST00000357672,ENST00000361054,ENST00000369965,ENST00000369962,ENST00000400794	ENSG00000085433	WDR47	hsa_circ_0013406	1	109002224	109011718	-
1:109004592|109011718	0	0	0	0	2.03388	0	0	0.677962	0.677962	0.50093	0.921644	exon	ENST00000357672,ENST00000361054,ENST00000369965,ENST00000369962,ENST00000400794	ENSG00000085433	WDR47	---	---	---	---	---
1:109010916|109011718	0	0	2.58309	2.32244	0	2.41525	0.861031	1.57923	0.7182	0.749534	0.921644	exon	ENST00000357672,ENST00000361054,ENST00000369965,ENST00000369962,ENST00000400794	ENSG00000085433	WDR47	hsa_circ_0013408	1	109010916	109011718	-
1:109010916|109017601	0	1.83985	0	0	0	0	0.613285	0	-0.613285	0.494453	0.921644	exon	ENST00000369965,ENST00000369962,ENST00000400794	ENSG00000085433	WDR47	---	---	---	---	---
1:109223978|109229572	1.38702	0	0	0	0	1.28966	0.46234	0.429887	-0.0324521	0.980058	0.991303	exon	ENST00000234677,ENST00000369923,ENST00000477544	ENSG00000031698	SARS	---	---	---	---	---
1:109223978|109231786	2.08091	0	0	1.71665	0	1.95955	0.693638	1.2254	0.531764	0.788741	0.926959	exon	ENST00000234677,ENST00000369923	ENSG00000031698	SARS	---	---	---	---	---
1:109223978|109235431	0	0	0	1.09988	0	0	0	0.366626	0.366626	0.661625	0.921644	exon	ENST00000234677,ENST00000369923,ENST00000477544	ENSG00000031698	SARS	---	---	---	---	---
1:109223982|109231786	1.38702	0	0	0	0	0	0.46234	0	-0.46234	0.58606	0.921644	exon	ENST00000234677,ENST00000369923	ENSG00000031698	SARS	---	---	---	---	---
1:109223982|109235431	0	1.83985	0	0	0	0	0.613285	0	-0.613285	0.494453	0.921644	exon	ENST00000234677,ENST00000369923,ENST00000477544	ENSG00000031698	SARS	---	---	---	---	---
1:109228352|109229572	0	0	0	0.652309	0	0	0	0.217436	0.217436	0.781429	0.921644	exon	ENST00000234677,ENST00000369923,ENST00000477544	ENSG00000031698	SARS	---	---	---	---	---
1:109228352|109231786	1.38702	2.62281	0.873449	1.09988	0	0	1.62776	0.366626	-1.26113	0.346103	0.921644	exon	ENST00000234677,ENST00000369923	ENSG00000031698	SARS	---	---	---	---	---
1:109229414|109231786	0	1.83985	0	0	0	0	0.613285	0	-0.613285	0.494453	0.921644	exon	ENST00000234677,ENST00000369923	ENSG00000031698	SARS	---	---	---	---	---
1:109229414|109235431	0	1.83985	0	0	0	0	0.613285	0	-0.613285	0.494453	0.921644	exon	ENST00000234677,ENST00000369923,ENST00000477544	ENSG00000031698	SARS	---	---	---	---	---
1:109230878|109231786	1.38702	0	1.80575	2.32244	0	3.27325	1.06426	1.86523	0.800975	0.365827	0.921644	exon	ENST00000234677,ENST00000369923	ENSG00000031698	SARS	hsa_circ_0007868	1	109230878	109231786	+
1:109316850|109345878	0	0	0	0.652309	0	0	0	0.217436	0.217436	0.781429	0.921644	exon	ENST00000538502,ENST00000256637	ENSG00000134243	SORT1	---	---	---	---	---
1:109326992|109345881	1.38702	0	0	0	0	0	0.46234	0	-0.46234	0.58606	0.921644	exon	ENST00000256637	ENSG00000134243	SORT1	---	---	---	---	---
1:109336240|109342158	0	0	1.41363	0	0	0	0.471212	0	-0.471212	0.566201	0.921644	exon	ENST00000538502,ENST00000256637	ENSG00000134243	SORT1	hsa_circ_0013441	1	109336240	109342158	-
1:109336240|109345878	0	0	0	1.71665	0	0	0	0.572217	0.572217	0.523576	0.921644	exon	ENST00000538502,ENST00000256637	ENSG00000134243	SORT1	---	---	---	---	---
1:109336240|109345881	0	0	0	2.32244	0	0	0	0.774146	0.774146	0.40131	0.921644	exon	ENST00000256637	ENSG00000134243	SORT1	---	---	---	---	---
1:109336240|109369589	0	1.83985	0	0	0	0	0.613285	0	-0.613285	0.494453	0.921644	exon	ENST00000538502,ENST00000256637	ENSG00000134243	SORT1	hsa_circ_0013442	1	109336240	109369589	-
1:109340724|109345878	0	0	0	1.94801	0	2.41525	0	1.45442	1.45442	0.183834	0.921644	exon	ENST00000538502,ENST00000256637	ENSG00000134243	SORT1	---	---	---	---	---
1:109340724|109345881	0	0	0	1.09988	0	0	0	0.366626	0.366626	0.661625	0.921644	exon	ENST00000256637	ENSG00000134243	SORT1	---	---	---	---	---
1:109342014|109345878	2.08091	0	0	1.44098	0	0	0.693638	0.480325	-0.213313	0.835429	0.941209	exon	ENST00000538502,ENST00000256637	ENSG00000134243	SORT1	---	---	---	---	---
1:109409928|109415363	0	0	0.873449	2.14734	0	0	0.29115	0.715779	0.424629	0.64772	0.921644	exon	ENST00000538610,ENST00000271308,ENST00000490870	ENSG00000143106	PSMA5	hsa_circ_0013454	1	109409928	109415363	-
1:109411877|109415363	1.38702	0	2.77067	0.652309	0	1.95955	1.3859	0.870621	-0.515276	0.592575	0.921644	exon	ENST00000538610,ENST00000271308,ENST00000490870	ENSG00000143106	PSMA5	---	---	---	---	---
1:109411877|109421926	0	1.83985	0	1.09988	0	0	0.613285	0.366626	-0.246659	0.840168	0.941209	exon	ENST00000538610,ENST00000271308,ENST00000490870	ENSG00000143106	PSMA5	---	---	---	---	---
1:109573737|109582565	0	0	0.873449	0	0	0	0.29115	0	-0.29115	0.69286	0.921644	exon	ENST00000369851	ENSG00000065135	GNAI3	---	---	---	---	---
1:109579204|109582565	0	0	2.11375	0	0	0	0.704583	0	-0.704583	0.413185	0.921644	exon	ENST00000369851	ENSG00000065135	GNAI3	hsa_circ_0006695	1	109579204	109582565	+
1:109579204|109586882	0	2.62281	0	3.17049	0	1.28966	0.874269	1.48672	0.612449	0.733949	0.921644	exon	ENST00000369851	ENSG00000065135	GNAI3	---	---	---	---	---
1:109582437|109586882	2.54748	0	0	1.71665	2.84602	1.28966	0.849161	1.95078	1.10162	0.628781	0.921644	exon	ENST00000369851	ENSG00000065135	GNAI3	---	---	---	---	---
1:110009034|110014857	0	0	0	1.44098	0	1.28966	0	0.910213	0.910213	0.436586	0.921644	exon	ENST00000475081,ENST00000393614,ENST00000359172,ENST00000369799	ENSG00000168710	AHCYL1	---	---	---	---	---
1:110011214|110016460	0	0	0.873449	0	0	0	0.29115	0	-0.29115	0.69286	0.921644	exon	ENST00000393614,ENST00000359172,ENST00000369799	ENSG00000168710	AHCYL1	---	---	---	---	---
1:110046680|110051887	0	1.83985	0	0	0	0	0.613285	0	-0.613285	0.494453	0.921644	exon	ENST00000369796,ENST00000485775,ENST00000369795,ENST00000473429	ENSG00000143093	STRIP1	---	---	---	---	---
1:11016844|11018873	0	0	1.80575	0.652309	0	1.95955	0.601917	0.870621	0.268704	0.9039	0.969548	exon	ENST00000614757,ENST00000621715,ENST00000240185,ENST00000476201,ENST00000621790,ENST00000473118,ENST00000472476,ENST00000315091,ENST00000616545,ENST00000473869,ENST00000629725	ENSG00000277726,ENSG00000120948	RP4-635E18.9,TARDBP	hsa_circ_0008660	1	11016844	11018873	+
1:11016844|11020599	0	0	0	1.44098	0	0	0	0.480325	0.480325	0.5841	0.921644	exon	ENST00000614757,ENST00000240185,ENST00000621790,ENST00000472476,ENST00000315091,ENST00000616545,ENST00000473869,ENST00000629725	ENSG00000277726,ENSG00000120948	RP4-635E18.9,TARDBP	---	---	---	---	---
1:11018733|11020599	0	0	0	0.652309	0	0	0	0.217436	0.217436	0.781429	0.921644	exon	ENST00000614757,ENST00000611963,ENST00000240185,ENST00000622057,ENST00000621790,ENST00000617172,ENST00000472476,ENST00000315091,ENST00000616545,ENST00000473869,ENST00000439080,ENST00000629725	ENSG00000277726,ENSG00000120948	RP4-635E18.9,TARDBP	---	---	---	---	---
1:11022178|11022520	0	0	0	0	0	2.76104	0	0.920346	0.920346	0.321336	0.921644	exon	ENST00000240185,ENST00000439080	ENSG00000120948	TARDBP	---	---	---	---	---
1:11022178|11022713	0	0	0	0	0	2.76104	0	0.920346	0.920346	0.321336	0.921644	exon	ENST00000240185,ENST00000439080	ENSG00000120948	TARDBP	---	---	---	---	---
1:110222964|110226178	0	0	2.36742	0	0	0	0.789141	0	-0.789141	0.368163	0.921644	exon	ENST00000413138,ENST00000459877,ENST00000369787,ENST00000438661,ENST00000469655	ENSG00000116396	KCNC4	---	---	---	---	---
1:11023668|11024024	0	0	0	0	0	1.28966	0	0.429887	0.429887	0.635324	0.921644	exon	ENST00000240185,ENST00000315091	ENSG00000120948	TARDBP	---	---	---	---	---
1:110375458|110379356	0	0	0	0	0	1.95955	0	0.653185	0.653185	0.485036	0.921644	exon	ENST00000541986,ENST00000472422,ENST00000369779,ENST00000492412,ENST00000528649,ENST00000437429	ENSG00000168679	SLC16A4	---	---	---	---	---
1:110375458|110381795	0	0	0	0	0	1.28966	0	0.429887	0.429887	0.635324	0.921644	exon	ENST00000541986,ENST00000461647,ENST00000369779,ENST00000369781,ENST00000492412	ENSG00000168679	SLC16A4	---	---	---	---	---
1:11068008|11076948	0	1.83985	0	0	0	0	0.613285	0	-0.613285	0.494453	0.921644	exon	ENST00000474216,ENST00000304457,ENST00000376936	ENSG00000171824	EXOSC10	---	---	---	---	---
4:128992167|129003876	8.44421	9.45674	9.70224	9.39877	9.41344	9.65927	9.20106	9.49049	0.289431	0.676423	0.921644	exon	ENST00000503215,ENST00000281142	ENSG00000151466	SCLT1	hsa_circ_0001439	4	128992167	129003876	-
1:11072087|11077651	0	1.83985	0	0	0	0	0.613285	0	-0.613285	0.494453	0.921644	exon	ENST00000474216,ENST00000304457,ENST00000376936	ENSG00000171824	EXOSC10	---	---	---	---	---
1:11073934|11074326	0	1.83985	0	1.71665	2.84602	1.95955	0.613285	2.17407	1.56079	0.238368	0.921644	exon	ENST00000474216,ENST00000376936	ENSG00000171824	EXOSC10	hsa_circ_0003467	1	11073934	11074326	-
1:11073934|11076948	0	0	0	1.44098	0	1.95955	0	1.13351	1.13351	0.332557	0.921644	exon	ENST00000474216,ENST00000376936	ENSG00000171824	EXOSC10	hsa_circ_0002448	1	11073934	11076948	-
1:11073934|11077651	0	0	0	1.44098	0	0	0	0.480325	0.480325	0.5841	0.921644	exon	ENST00000474216,ENST00000376936	ENSG00000171824	EXOSC10	---	---	---	---	---
1:11076842|11082878	0	0	0	1.71665	0	0	0	0.572217	0.572217	0.523576	0.921644	exon	ENST00000304457,ENST00000376936	ENSG00000171824	EXOSC10	---	---	---	---	---
1:11080764|11081238	0	0	2.11375	0.652309	0	0	0.704583	0.217436	-0.487147	0.606858	0.921644	exon	ENST00000485606,ENST00000304457,ENST00000376936	ENSG00000171824	EXOSC10	---	---	---	---	---
1:110891392|110892533	0	0	1.41363	0.652309	0	0	0.471212	0.217436	-0.253775	0.800965	0.931732	exon	ENST00000471220,ENST00000271324,ENST00000476408	ENSG00000143119	CD53	hsa_circ_0000105	1	110891392	110892533	+
1:110891392|110895055	0	0	0	1.44098	0	0	0	0.480325	0.480325	0.5841	0.921644	exon	ENST00000271324	ENSG00000143119	CD53	---	---	---	---	---
1:11090554|11091597	1.38702	0	1.80575	0	3.74203	3.03976	1.06426	2.2606	1.19634	0.304331	0.921644	exon	ENST00000304457,ENST00000376936	ENSG00000171824	EXOSC10	hsa_circ_0000017	1	11090554	11091597	-
1:11109290|11122126	0	0	0	1.94801	0	0	0	0.649335	0.649335	0.47295	0.921644	exon	ENST00000376838,ENST00000361445	ENSG00000198793	MTOR	hsa_circ_0009780	1	11109290	11122126	-
1:111118805|111126294	0	0	0	1.44098	0	0	0	0.480325	0.480325	0.5841	0.921644	exon	ENST00000286692,ENST00000461449,ENST00000484310,ENST00000539140,ENST00000496430	ENSG00000156171	DRAM2	hsa_circ_0013489	1	111118805	111126294	-
1:111118805|111137586	0	0	0.873449	0	0	0	0.29115	0	-0.29115	0.69286	0.921644	exon	ENST00000286692,ENST00000484310,ENST00000539140,ENST00000496430	ENSG00000156171	DRAM2	---	---	---	---	---
1:111124742|111137586	0	0	0	1.09988	0	0	0	0.366626	0.366626	0.661625	0.921644	exon	ENST00000286692,ENST00000484310,ENST00000539140,ENST00000462092	ENSG00000156171	DRAM2	---	---	---	---	---
1:111147642|111148053	1.38702	1.83985	0	0	3.74203	0	1.07562	1.24734	0.17172	0.656403	0.921644	exon	ENST00000545121,ENST00000460443,ENST00000476865,ENST00000480324,ENST00000357172,ENST00000498239	ENSG00000134255	CEPT1	hsa_circ_0013496	1	111147642	111148053	+
1:111147642|111161296	0	2.62281	0	1.09988	0	0	0.874269	0.366626	-0.507644	0.597016	0.921644	exon	ENST00000545121,ENST00000460443,ENST00000357172,ENST00000498239	ENSG00000134255	CEPT1	hsa_circ_0000106	1	111147642	111161296	+
1:111147642|111174963	1.38702	1.83985	0	0	2.84602	0	1.07562	0.948672	-0.126952	0.875532	0.957458	exon	ENST00000545121,ENST00000460443,ENST00000357172,ENST00000498239	ENSG00000134255	CEPT1	hsa_circ_0013497	1	111147642	111174963	+
1:11121246|11122126	0	0	0.873449	1.71665	0	0	0.29115	0.572217	0.281068	0.768855	0.921644	exon	ENST00000376838,ENST00000361445	ENSG00000198793	MTOR	hsa_circ_0009792	1	11121246	11122126	-
7:158759486|158764853	9.11233	9.19623	9.15931	9.47028	9.36009	8.90448	9.15596	9.24495	0.0889891	0.714014	0.921644	exon	ENST00000613624,ENST00000275418,ENST00000251527	ENSG00000117868	ESYT2	hsa_circ_0001776	7	158759486	158764853	-
1:111419610|111426641	2.89947	0	0	0	0	0	0.966489	0	-0.966489	0.255082	0.921644	exon	ENST00000369732	ENSG00000085465	OVGP1	---	---	---	---	---
1:111456086|111456755	0	0	1.41363	0	0	0	0.471212	0	-0.471212	0.566201	0.921644	exon	ENST00000369722,ENST00000369721,ENST00000483994	ENSG00000116459	ATP5F1	---	---	---	---	---
1:111456086|111459636	4.45943	0	2.77067	4.46938	5.13116	3.6505	2.41003	4.41701	2.00698	0.324714	0.921644	exon	ENST00000369722,ENST00000369721,ENST00000483994	ENSG00000116459	ATP5F1	hsa_circ_0006130	1	111456086	111459636	+
1:111691334|111703476	0	0	0	1.44098	0	0	0	0.480325	0.480325	0.5841	0.921644	exon	ENST00000369709,ENST00000494982,ENST00000356415,ENST00000433097	ENSG00000116473	RAP1A	---	---	---	---	---
1:111691334|111709264	0	0	0	1.71665	0	0	0	0.572217	0.572217	0.523576	0.921644	exon	ENST00000369709,ENST00000494982,ENST00000356415	ENSG00000116473	RAP1A	---	---	---	---	---
1:111695341|111704486	0	0	0	0.652309	0	0	0	0.217436	0.217436	0.781429	0.921644	exon	ENST00000369709,ENST00000494982,ENST00000356415	ENSG00000116473	RAP1A	---	---	---	---	---
1:111703336|111706777	0	0	0	1.09988	0	0	0	0.366626	0.366626	0.661625	0.921644	exon	ENST00000494982	ENSG00000116473	RAP1A	---	---	---	---	---
1:111756646|111760848	0	0	0	2.14734	0	0	0	0.715779	0.715779	0.433375	0.921644	exon	ENST00000369702,ENST00000533164	ENSG00000064703	DDX20	---	---	---	---	---
1:11199258|11199703	0	0	0.873449	0	0	0	0.29115	0	-0.29115	0.69286	0.921644	exon	ENST00000361445	ENSG00000198793	MTOR	---	---	---	---	---
1:11199258|11209458	0	0	1.41363	0	0	0	0.471212	0	-0.471212	0.566201	0.921644	exon	ENST00000361445	ENSG00000198793	MTOR	---	---	---	---	---
1:11212312|11216234	0	0	0	1.44098	0	0	0	0.480325	0.480325	0.5841	0.921644	exon	ENST00000361445	ENSG00000198793	MTOR	---	---	---	---	---
1:11228668|11231054	0	0	0	0	2.84602	0	0	0.948672	0.948672	0.330659	0.921644	exon	ENST00000361445	ENSG00000198793	MTOR	---	---	---	---	---
1:11228668|11248094	0	0	0	1.09988	0	0	0	0.366626	0.366626	0.661625	0.921644	exon	ENST00000361445	ENSG00000198793	MTOR	---	---	---	---	---
1:11237843|11243300	0	0	0	1.94801	0	0	0	0.649335	0.649335	0.47295	0.921644	exon	ENST00000361445	ENSG00000198793	MTOR	hsa_circ_0009841	1	11237843	11243300	-
1:11240303|11243300	0	0	0	0	2.84602	0	0	0.948672	0.948672	0.330659	0.921644	exon	ENST00000361445	ENSG00000198793	MTOR	---	---	---	---	---
1:11247625|11248094	0	0	0.873449	1.94801	0	3.03976	0.29115	1.66259	1.37144	0.188443	0.921644	exon	ENST00000361445	ENSG00000198793	MTOR	---	---	---	---	---
1:112540779|112556018	0	0	0	1.09988	0	1.95955	0	1.01981	1.01981	0.374354	0.921644	exon	ENST00000490715,ENST00000361846	ENSG00000007341	ST7L	---	---	---	---	---
1:112541951|112556018	2.08091	0	0	0	0	0	0.693638	0	-0.693638	0.429293	0.921644	exon	ENST00000369669,ENST00000343210,ENST00000490715,ENST00000369666,ENST00000361846,ENST00000358039,ENST00000360743,ENST00000490067,ENST00000497457,ENST00000418497,ENST00000463235	ENSG00000007341	ST7L	---	---	---	---	---
1:112541951|112578417	0	0	0.873449	0	0	0	0.29115	0	-0.29115	0.69286	0.921644	exon	ENST00000369669,ENST00000343210,ENST00000490715,ENST00000369666,ENST00000361846,ENST00000358039,ENST00000360743,ENST00000480988,ENST00000490067,ENST00000497457,ENST00000463235	ENSG00000007341	ST7L	---	---	---	---	---
1:112541951|112582472	0	2.62281	0	0	0	0	0.874269	0	-0.874269	0.339128	0.921644	exon	ENST00000369669,ENST00000343210,ENST00000490715,ENST00000369666,ENST00000361846,ENST00000358039,ENST00000360743,ENST00000490067,ENST00000497457,ENST00000418497,ENST00000463235	ENSG00000007341	ST7L	---	---	---	---	---
1:112541951|112591603	0	0	0	0.652309	0	0	0	0.217436	0.217436	0.781429	0.921644	exon	ENST00000369669,ENST00000343210,ENST00000490715,ENST00000369666,ENST00000361846,ENST00000358039,ENST00000360743,ENST00000480988,ENST00000490067,ENST00000497457,ENST00000418497,ENST00000463235	ENSG00000007341	ST7L	---	---	---	---	---
1:112541951|112616895	0	0	0	0	2.03388	0	0	0.677962	0.677962	0.50093	0.921644	exon	ENST00000369669,ENST00000343210,ENST00000490715,ENST00000361846,ENST00000358039,ENST00000360743,ENST00000463235	ENSG00000007341	ST7L	---	---	---	---	---
1:112550601|112578417	0	0	0	1.71665	0	0	0	0.572217	0.572217	0.523576	0.921644	exon	ENST00000369669,ENST00000343210,ENST00000490715,ENST00000369666,ENST00000361846,ENST00000358039,ENST00000480988,ENST00000490067,ENST00000497457,ENST00000463235	ENSG00000007341	ST7L	---	---	---	---	---
1:112555868|112616895	0	0	0.873449	0	0	0	0.29115	0	-0.29115	0.69286	0.921644	exon	ENST00000369669,ENST00000343210,ENST00000490715,ENST00000361846,ENST00000358039,ENST00000360743,ENST00000463235	ENSG00000007341	ST7L	hsa_circ_0000107	1	112555868	112616895	-
1:112576986|112584126	0	0	0	0	2.03388	0	0	0.677962	0.677962	0.50093	0.921644	exon	ENST00000369669,ENST00000343210,ENST00000490715,ENST00000369666,ENST00000361846,ENST00000358039,ENST00000360743,ENST00000490067,ENST00000497457,ENST00000463235	ENSG00000007341	ST7L	---	---	---	---	---
1:112576986|112598086	2.08091	0	0.873449	0	0	0	0.984788	0	-0.984788	0.346767	0.921644	exon	ENST00000369669,ENST00000343210,ENST00000490715,ENST00000369666,ENST00000361846,ENST00000358039,ENST00000360743,ENST00000480988,ENST00000490067,ENST00000497457,ENST00000463235	ENSG00000007341	ST7L	---	---	---	---	---
1:112576986|112600848	0	2.62281	0	0	0	0	0.874269	0	-0.874269	0.339128	0.921644	exon	ENST00000343210,ENST00000490715,ENST00000369666,ENST00000361846,ENST00000358039,ENST00000360743,ENST00000480988,ENST00000490067,ENST00000497457,ENST00000463235	ENSG00000007341	ST7L	hsa_circ_0013521	1	112576986	112600848	-
1:112581992|112584126	1.38702	0	0	0	0	0	0.46234	0	-0.46234	0.58606	0.921644	exon	ENST00000369669,ENST00000343210,ENST00000490715,ENST00000369666,ENST00000361846,ENST00000358039,ENST00000360743,ENST00000490067,ENST00000463235	ENSG00000007341	ST7L	---	---	---	---	---
1:112581992|112616895	0	0	1.80575	0	0	0	0.601917	0	-0.601917	0.475406	0.921644	exon	ENST00000369669,ENST00000343210,ENST00000490715,ENST00000361846,ENST00000358039,ENST00000360743,ENST00000463235	ENSG00000007341	ST7L	---	---	---	---	---
1:112583972|112616895	0	0	0.873449	0	0	0	0.29115	0	-0.29115	0.69286	0.921644	exon	ENST00000369664,ENST00000369669,ENST00000343210,ENST00000490715,ENST00000361846,ENST00000358039,ENST00000360743,ENST00000463235	ENSG00000007341	ST7L	---	---	---	---	---
1:112591525|112611003	1.38702	1.83985	0	2.32244	0	2.41525	1.07562	1.57923	0.503606	0.568768	0.921644	exon	ENST00000479436,ENST00000369664,ENST00000369669,ENST00000343210,ENST00000490715,ENST00000369666,ENST00000361846,ENST00000497235,ENST00000358039,ENST00000360743,ENST00000480988,ENST00000490067,ENST00000497457,ENST00000463235	ENSG00000007341	ST7L	---	---	---	---	---
14:99458279|99465813	9.19815	9.32367	8.70684	9.15726	8.68875	8.45376	9.07622	8.76659	-0.309632	0.254176	0.921644	exon	ENST00000329331,ENST00000630307,ENST00000331768,ENST00000446066,ENST00000357563,ENST00000436070,ENST00000453764	ENSG00000183576	SETD3	hsa_circ_0000567	14	99458279	99465813	-
1:112597971|112600848	2.08091	0	0	1.44098	0	0	0.693638	0.480325	-0.213313	0.835429	0.941209	exon	ENST00000479436,ENST00000369664,ENST00000343210,ENST00000490715,ENST00000369666,ENST00000361846,ENST00000358039,ENST00000360743,ENST00000480988,ENST00000490067,ENST00000497457,ENST00000418497,ENST00000463235	ENSG00000007341	ST7L	hsa_circ_0013522	1	112597971	112600848	-
1:112597971|112611003	0	1.83985	0	0.652309	0	3.03976	0.613285	1.23069	0.617405	0.48133	0.921644	exon	ENST00000479436,ENST00000369664,ENST00000369669,ENST00000343210,ENST00000490715,ENST00000369666,ENST00000361846,ENST00000497235,ENST00000358039,ENST00000360743,ENST00000480988,ENST00000490067,ENST00000497457,ENST00000463235	ENSG00000007341	ST7L	---	---	---	---	---
1:112597971|112616844	0	0	0	1.09988	0	0	0	0.366626	0.366626	0.661625	0.921644	exon	ENST00000479436,ENST00000369664,ENST00000369669,ENST00000343210,ENST00000490715,ENST00000369666,ENST00000361846,ENST00000497235,ENST00000358039,ENST00000360743,ENST00000490067,ENST00000463235	ENSG00000007341	ST7L	hsa_circ_0013523	1	112597971	112616844	-
1:112597971|112616895	1.38702	2.62281	1.80575	2.74778	2.03388	0	1.93853	1.59389	-0.344638	0.987725	0.99478	exon	ENST00000479436,ENST00000369664,ENST00000369669,ENST00000343210,ENST00000490715,ENST00000361846,ENST00000497235,ENST00000358039,ENST00000360743,ENST00000463235	ENSG00000007341	ST7L	hsa_circ_0013524	1	112597971	112616895	-
1:112600794|112611003	0	0	2.36742	0	0	0	0.789141	0	-0.789141	0.368163	0.921644	exon	ENST00000479436,ENST00000369664,ENST00000343210,ENST00000490715,ENST00000369666,ENST00000361846,ENST00000358039,ENST00000360743,ENST00000480988,ENST00000470519,ENST00000490067,ENST00000497457,ENST00000463235,ENST00000459630	ENSG00000007341	ST7L	hsa_circ_0000108	1	112600794	112611003	-
1:112610841|112616895	0	1.83985	2.36742	0.652309	0	0	1.40243	0.217436	-1.18499	0.31606	0.921644	exon	ENST00000479436,ENST00000369664,ENST00000369669,ENST00000343210,ENST00000490715,ENST00000361846,ENST00000497235,ENST00000358039,ENST00000473206,ENST00000360743,ENST00000492274,ENST00000470519,ENST00000463235,ENST00000459630,ENST00000485753,ENST00000498383,ENST00000467335	ENSG00000007341	ST7L	hsa_circ_0003277	1	112610841	112616895	-
1:112647210|112659779	0	0	0	0.652309	0	0	0	0.217436	0.217436	0.781429	0.921644	exon	ENST00000498626,ENST00000263168,ENST00000476936	ENSG00000116489	CAPZA1	---	---	---	---	---
1:66891154|66905375	8.66697	9.04943	9.28778	8.84568	9.15606	9.22668	9.00139	9.07614	0.0747468	0.955349	0.983054	exon	ENST00000371023,ENST00000371026,ENST00000371022	ENSG00000152763	WDR78	hsa_circ_0006677	1	66891154	66905375	-
10:7243558|7285954	8.91403	8.70161	9.34427	8.73776	8.9091	8.90882	8.98664	8.85189	-0.134744	0.297905	0.921644	exon	ENST00000361972,ENST00000397167	ENSG00000198879	SFMBT2	hsa_circ_0017636	10	7243558	7285954	-
1:112653598|112669605	0	0	0	1.44098	0	0	0	0.480325	0.480325	0.5841	0.921644	exon	ENST00000263168	ENSG00000116489	CAPZA1	hsa_circ_0013533	1	112653598	112669605	+
1:112686966|112690098	0	0	0	0.652309	0	0	0	0.217436	0.217436	0.781429	0.921644	exon	ENST00000496577,ENST00000369644	ENSG00000155363	MOV10	---	---	---	---	---
1:112690099|112691622	0	0	0	0	2.03388	0	0	0.677962	0.677962	0.50093	0.921644	intron	ENST00000357443,ENST00000413052,ENST00000496577,ENST00000468624,ENST00000369645,ENST00000369644	ENSG00000155363	MOV10	---	---	---	---	---
1:112691665|112692929	0	0	0	1.09988	0	0	0	0.366626	0.366626	0.661625	0.921644	exon	ENST00000357443,ENST00000413052,ENST00000496577,ENST00000468624,ENST00000369645,ENST00000369644	ENSG00000155363	MOV10	hsa_circ_0013542	1	112691665	112692929	+
1:112694018|112694896	0	0	1.41363	0	0	0	0.471212	0	-0.471212	0.566201	0.921644	exon	ENST00000357443,ENST00000413052,ENST00000496577,ENST00000468624,ENST00000369645,ENST00000369644	ENSG00000155363	MOV10	---	---	---	---	---
1:112694173|112694431	0	0	1.80575	0	0	0	0.601917	0	-0.601917	0.475406	0.921644	intron	ENST00000357443,ENST00000413052,ENST00000496577,ENST00000468624,ENST00000479858,ENST00000369645,ENST00000369644	ENSG00000155363	MOV10	---	---	---	---	---
1:112917178|112918044	0	0	0	0	0	1.95955	0	0.653185	0.653185	0.485036	0.921644	exon	ENST00000538576,ENST00000458229,ENST00000369626	ENSG00000155380	SLC16A1	hsa_circ_0013561	1	112917178	112918044	-
1:112917178|112929352	1.38702	0	0	0	0	0	0.46234	0	-0.46234	0.58606	0.921644	exon	ENST00000538576,ENST00000458229,ENST00000369626	ENSG00000155380	SLC16A1	hsa_circ_0013562	1	112917178	112929352	-
1:112960477|112999109	0	0	0	0.652309	0	0	0	0.217436	0.217436	0.781429	0.921644	exon	ENST00000435800,ENST00000627431	ENSG00000226419	SLC16A1-AS1	---	---	---	---	---
1:112998930|113008360	0	0	0	1.09988	0	0	0	0.366626	0.366626	0.661625	0.921644	exon	ENST00000627431	ENSG00000226419	SLC16A1-AS1	---	---	---	---	---
1:113091318|113094482	0	0	0	1.71665	0	0	0	0.572217	0.572217	0.523576	0.921644	exon	ENST00000361127	ENSG00000198799	LRIG2	hsa_circ_0013568	1	113091318	113094482	+
1:113091318|113098785	0	0	0	0	0	2.41525	0	0.805084	0.805084	0.395572	0.921644	exon	ENST00000361127	ENSG00000198799	LRIG2	hsa_circ_0013569	1	113091318	113098785	+
1:113091318|113110562	1.38702	0	0	0	0	0	0.46234	0	-0.46234	0.58606	0.921644	exon	ENST00000361127	ENSG00000198799	LRIG2	hsa_circ_0013571	1	113091318	113110562	+
1:113093206|113094755	1.38702	0	0	1.44098	0	0	0.46234	0.480325	0.0179858	0.959736	0.983054	exon	ENST00000361127	ENSG00000198799	LRIG2	---	---	---	---	---
1:113094612|113100488	0	0	0.873449	0	0	0	0.29115	0	-0.29115	0.69286	0.921644	exon	ENST00000361127	ENSG00000198799	LRIG2	---	---	---	---	---
1:113107594|113110562	1.38702	0	0	0	0	0	0.46234	0	-0.46234	0.58606	0.921644	exon	ENST00000466161,ENST00000361127,ENST00000492207	ENSG00000198799	LRIG2	---	---	---	---	---
1:113107594|113119523	2.54748	0	0	2.32244	0	0	0.849161	0.774146	-0.0750142	0.95515	0.983054	exon	ENST00000466161,ENST00000361127,ENST00000492207	ENSG00000198799	LRIG2	---	---	---	---	---
1:113112479|113114876	0	0	0	1.09988	0	0	0	0.366626	0.366626	0.661625	0.921644	exon	ENST00000466161,ENST00000361127,ENST00000492207	ENSG00000198799	LRIG2	---	---	---	---	---
1:113112479|113116436	0	0	0	1.09988	0	1.95955	0	1.01981	1.01981	0.374354	0.921644	exon	ENST00000466161,ENST00000361127,ENST00000492207	ENSG00000198799	LRIG2	hsa_circ_0013583	1	113112479	113116436	+
1:113112479|113119523	2.54748	2.62281	2.77067	3.25931	0	2.76104	2.64699	2.00678	-0.640206	0.966148	0.987152	exon	ENST00000466161,ENST00000361127,ENST00000492207	ENSG00000198799	LRIG2	hsa_circ_0013584	1	113112479	113119523	+
1:113116287|113119523	0	0	0	0	0	1.28966	0	0.429887	0.429887	0.635324	0.921644	exon	ENST00000466161,ENST00000361127,ENST00000492207	ENSG00000198799	LRIG2	hsa_circ_0013586	1	113116287	113119523	+
1:113119233|113119523	0	0	2.11375	0	0	0	0.704583	0	-0.704583	0.413185	0.921644	exon	ENST00000466161,ENST00000361127,ENST00000492207	ENSG00000198799	LRIG2	hsa_circ_0013587	1	113119233	113119523	+
1:113549515|113585596	0	0	0.873449	0	0	0	0.29115	0	-0.29115	0.69286	0.921644	exon	ENST00000369615,ENST00000307546,ENST00000369611,ENST00000369617	ENSG00000081026	MAGI3	---	---	---	---	---
1:113549515|113622994	1.38702	0	0	0	0	1.28966	0.46234	0.429887	-0.0324521	0.980058	0.991303	exon	ENST00000369615,ENST00000307546,ENST00000369611,ENST00000369617	ENSG00000081026	MAGI3	---	---	---	---	---
1:113580542|113594560	1.38702	0	0.873449	0	0	1.28966	0.753489	0.429887	-0.323602	0.84212	0.941209	exon	ENST00000369615,ENST00000307546,ENST00000369611,ENST00000369617	ENSG00000081026	MAGI3	hsa_circ_0013590	1	113580542	113594560	+
1:113585387|113590658	0	0	0.873449	1.44098	0	1.95955	0.29115	1.13351	0.84236	0.515462	0.921644	exon	ENST00000369615,ENST00000307546,ENST00000369611,ENST00000369617	ENSG00000081026	MAGI3	---	---	---	---	---
1:113585387|113594560	2.54748	3.50067	2.77067	3.17049	0	3.47417	2.93961	2.21489	-0.72472	0.912775	0.973435	exon	ENST00000369615,ENST00000307546,ENST00000369611,ENST00000369617	ENSG00000081026	MAGI3	---	---	---	---	---
1:113585387|113622994	1.38702	0	2.11375	0	0	1.95955	1.16692	0.653185	-0.513738	0.763758	0.921644	exon	ENST00000369615,ENST00000307546,ENST00000369611,ENST00000369617	ENSG00000081026	MAGI3	---	---	---	---	---
1:113614601|113622994	0	0	2.58309	0.652309	3.74203	0	0.861031	1.46478	0.60375	0.704226	0.921644	exon	ENST00000369615,ENST00000307546,ENST00000369611,ENST00000369617	ENSG00000081026	MAGI3	---	---	---	---	---
1:113643743|113659265	0	0	0	0.652309	0	0	0	0.217436	0.217436	0.781429	0.921644	exon	ENST00000369615,ENST00000307546,ENST00000369611,ENST00000369617	ENSG00000081026	MAGI3	---	---	---	---	---
1:113646486|113651206	0	0	0.873449	0	0	0	0.29115	0	-0.29115	0.69286	0.921644	exon	ENST00000369615,ENST00000307546,ENST00000369611,ENST00000369617	ENSG00000081026	MAGI3	---	---	---	---	---
1:113646486|113659265	0	0	0	1.09988	0	0	0	0.366626	0.366626	0.661625	0.921644	exon	ENST00000369615,ENST00000307546,ENST00000369611,ENST00000369617	ENSG00000081026	MAGI3	---	---	---	---	---
1:113646486|113673465	0	0	1.80575	0	0	0	0.601917	0	-0.601917	0.475406	0.921644	exon	ENST00000369615,ENST00000307546,ENST00000369611,ENST00000369617	ENSG00000081026	MAGI3	---	---	---	---	---
1:113671734|113673465	2.89947	3.1275	4.74379	3.25931	0	3.8076	3.59025	2.35564	-1.23462	0.461377	0.921644	exon	ENST00000369615,ENST00000307546,ENST00000369611,ENST00000369617	ENSG00000081026	MAGI3	hsa_circ_0006583	1	113671734	113673465	+
1:113704081|113706722	3.4185	0	0	1.71665	0	1.28966	1.1395	1.0021	-0.137394	0.638879	0.921644	exon	ENST00000369600,ENST00000474926,ENST00000369598,ENST00000369604,ENST00000393357,ENST00000357783	ENSG00000116793	PHTF1	---	---	---	---	---
1:113705890|113706722	0	1.83985	0	0	0	0	0.613285	0	-0.613285	0.494453	0.921644	exon	ENST00000369600,ENST00000474926,ENST00000369598,ENST00000369604,ENST00000393357,ENST00000412670,ENST00000357783	ENSG00000116793	PHTF1	---	---	---	---	---
1:113705890|113712113	0	1.83985	0	0	2.84602	1.95955	0.613285	1.60186	0.988572	0.442522	0.921644	exon	ENST00000369600,ENST00000474926,ENST00000369598,ENST00000369604,ENST00000393357,ENST00000412670,ENST00000357783	ENSG00000116793	PHTF1	---	---	---	---	---
1:113710254|113712113	0	0	0	1.44098	0	0	0	0.480325	0.480325	0.5841	0.921644	exon	ENST00000369600,ENST00000474926,ENST00000369598,ENST00000369604,ENST00000393357,ENST00000412670,ENST00000357783	ENSG00000116793	PHTF1	---	---	---	---	---
1:113710254|113738799	0	0	0.873449	0	0	0	0.29115	0	-0.29115	0.69286	0.921644	exon	ENST00000369600,ENST00000369598,ENST00000369604,ENST00000393357,ENST00000357783	ENSG00000116793	PHTF1	---	---	---	---	---
1:113724759|113726574	2.08091	0	0.873449	0	0	0	0.984788	0	-0.984788	0.346767	0.921644	exon	ENST00000369600,ENST00000369604,ENST00000393357,ENST00000357783	ENSG00000116793	PHTF1	hsa_circ_0007602	1	113724759	113726574	-
1:113724759|113738799	0	1.83985	0	0	0	0	0.613285	0	-0.613285	0.494453	0.921644	exon	ENST00000369600,ENST00000369604,ENST00000393357,ENST00000357783	ENSG00000116793	PHTF1	---	---	---	---	---
1:113726418|113738799	0	2.62281	0	1.09988	0	0	0.874269	0.366626	-0.507644	0.597016	0.921644	exon	ENST00000369600,ENST00000369598,ENST00000369604,ENST00000393357,ENST00000357783	ENSG00000116793	PHTF1	hsa_circ_0006185	1	113726418	113738799	-
1:113726418|113758733	0	0	0	1.71665	0	0	0	0.572217	0.572217	0.523576	0.921644	exon	ENST00000369600,ENST00000369598,ENST00000369604,ENST00000393357,ENST00000357783	ENSG00000116793	PHTF1	---	---	---	---	---
1:113738269|113738729	1.38702	0	0	0	0	0	0.46234	0	-0.46234	0.58606	0.921644	intron	ENST00000369600,ENST00000486855,ENST00000369598,ENST00000446739,ENST00000369604,ENST00000393357,ENST00000357783	ENSG00000116793	PHTF1	---	---	---	---	---
1:113777210|113777808	0	0	1.80575	0	0	0	0.601917	0	-0.601917	0.475406	0.921644	exon	ENST00000476412,ENST00000615321,ENST00000612242,ENST00000261441,ENST00000616024	ENSG00000081019	RSBN1	hsa_circ_0013607	1	113777210	113777808	-
1:113777210|113798036	0	0	0	0	0	1.28966	0	0.429887	0.429887	0.635324	0.921644	exon	ENST00000476412,ENST00000615321,ENST00000612242,ENST00000261441,ENST00000616024	ENSG00000081019	RSBN1	---	---	---	---	---
1:113829592|113834439	0	0	0	2.61944	0	0	0	0.873148	0.873148	0.343453	0.921644	exon	ENST00000538253,ENST00000532224,ENST00000528414,ENST00000359785,ENST00000525799,ENST00000420377	ENSG00000134242	PTPN22	hsa_circ_0000110	1	113829592	113834439	-
1:113834910|113855049	1.38702	0	0	0	2.03388	1.95955	0.46234	1.33115	0.868807	0.55246	0.921644	exon	ENST00000538253,ENST00000484147,ENST00000528414,ENST00000359785,ENST00000420377	ENSG00000134242	PTPN22	---	---	---	---	---
1:113837590|113838407	0	0	0	1.71665	0	0	0	0.572217	0.572217	0.523576	0.921644	exon	ENST00000538253,ENST00000532224,ENST00000484147,ENST00000528414,ENST00000359785,ENST00000525799,ENST00000420377	ENSG00000134242	PTPN22	---	---	---	---	---
1:113837590|113838620	0	0	0	0	0	1.95955	0	0.653185	0.653185	0.485036	0.921644	exon	ENST00000538253,ENST00000532224,ENST00000484147,ENST00000528414,ENST00000359785,ENST00000525799,ENST00000420377	ENSG00000134242	PTPN22	---	---	---	---	---
1:113848540|113855049	0	3.50067	2.11375	2.61944	0	2.76104	1.87147	1.79349	-0.077979	0.891926	0.965665	exon	ENST00000538253,ENST00000484147,ENST00000359785,ENST00000420377	ENSG00000134242	PTPN22	hsa_circ_0000111	1	113848540	113855049	-
1:23030469|23050520	9.02556	9.05644	8.74651	8.71635	9.15606	8.9431	8.94284	8.93851	-0.00432977	0.787013	0.925785	exon	ENST00000400181,ENST00000356634	ENSG00000004487	KDM1A	hsa_circ_0009061	1	23030469	23050520	+
1:113897840|113902862	0	0	2.36742	0	0	1.95955	0.789141	0.653185	-0.135956	0.877605	0.958747	exon	ENST00000369569,ENST00000256658	ENSG00000134262	AP4B1	---	---	---	---	---
1:113898718|113901885	2.89947	0	0	0	0	0	0.966489	0	-0.966489	0.255082	0.921644	exon	ENST00000484201,ENST00000369569,ENST00000256658	ENSG00000134262	AP4B1	---	---	---	---	---
1:113906996|113908191	0	1.83985	0.873449	1.09988	0	2.76104	0.904434	1.28697	0.382537	0.61864	0.921644	exon	ENST00000369563	ENSG00000118655	DCLRE1B	---	---	---	---	---
1:113940382|113941459	2.89947	0	0	1.09988	0	0	0.966489	0.366626	-0.599864	0.572768	0.921644	exon	ENST00000369559,ENST00000426820,ENST00000369555,ENST00000369561,ENST00000626993,ENST00000369558	ENSG00000163349	HIPK1	hsa_circ_0013617	1	113940382	113941459	+
1:113952766|113968648	2.08091	0	2.11375	1.09988	0	0	1.39822	0.366626	-1.0316	0.425608	0.921644	exon	ENST00000369559,ENST00000426820,ENST00000369555,ENST00000340480,ENST00000369561,ENST00000626993,ENST00000369558	ENSG00000163349	HIPK1	hsa_circ_0013619	1	113952766	113968648	+
1:113954626|113968648	0	0	0	0	0	1.28966	0	0.429887	0.429887	0.635324	0.921644	exon	ENST00000369553	ENSG00000163349	HIPK1	---	---	---	---	---
1:113954651|113967948	0	0	0	1.09988	0	0	0	0.366626	0.366626	0.661625	0.921644	exon	ENST00000369559,ENST00000426820,ENST00000369555,ENST00000340480,ENST00000369553,ENST00000369561,ENST00000626993,ENST00000369558	ENSG00000163349	HIPK1	---	---	---	---	---
1:113954651|113968648	0	2.62281	0	1.09988	0	2.41525	0.874269	1.17171	0.29744	0.931432	0.977349	exon	ENST00000369559,ENST00000426820,ENST00000369555,ENST00000340480,ENST00000369553,ENST00000369561,ENST00000626993,ENST00000369558	ENSG00000163349	HIPK1	hsa_circ_0013620	1	113954651	113968648	+
1:114405410|114410316	0	0	0	0	3.74203	0	0	1.24734	1.24734	0.226265	0.921644	exon	ENST00000448034,ENST00000358465,ENST00000369543	ENSG00000197323	TRIM33	---	---	---	---	---
1:114463104|114463556	2.54748	1.83985	0	0	2.84602	0	1.46245	0.948672	-0.513773	0.890464	0.964751	exon	ENST00000358465,ENST00000369543	ENSG00000197323	TRIM33	hsa_circ_0013637	1	114463104	114463556	-
2:147896301|147899898	9.03891	8.70161	8.83591	8.48273	8.98155	8.63245	8.85881	8.69891	-0.159903	0.266711	0.921644	exon	ENST00000462659,ENST00000241416,ENST00000404590	ENSG00000121989	ACVR2A	hsa_circ_0001073	2	147896301	147899898	+
1:114587387|114587952	0	2.62281	0	1.09988	0	0	0.874269	0.366626	-0.507644	0.597016	0.921644	exon	ENST00000481894,ENST00000393277,ENST00000495031,ENST00000393274,ENST00000393276	ENSG00000175984	DENND2C	---	---	---	---	---
1:114587387|114595873	1.38702	0	0	0	0	0	0.46234	0	-0.46234	0.58606	0.921644	exon	ENST00000481894,ENST00000393277,ENST00000393274,ENST00000393276	ENSG00000175984	DENND2C	---	---	---	---	---
1:114604922|114618482	0	0	0	0	0	1.28966	0	0.429887	0.429887	0.635324	0.921644	exon	ENST00000481894,ENST00000393277,ENST00000393274,ENST00000393276	ENSG00000175984	DENND2C	---	---	---	---	---
1:114608686|114622065	2.54748	0	0.873449	0	0	0	1.14031	0	-1.14031	0.24585	0.921644	exon	ENST00000481894,ENST00000393277,ENST00000393274	ENSG00000175984	DENND2C	---	---	---	---	---
1:114621895|114623643	0	0	1.41363	0	0	1.28966	0.471212	0.429887	-0.041324	0.955876	0.983054	exon	ENST00000481894,ENST00000393277,ENST00000393274	ENSG00000175984	DENND2C	---	---	---	---	---
1:114625179|114645559	0	0	0	0	3.74203	0	0	1.24734	1.24734	0.226265	0.921644	exon	ENST00000393274	ENSG00000175984	DENND2C	---	---	---	---	---
1:114709569|114713978	1.38702	0	0	0	0	0	0.46234	0	-0.46234	0.58606	0.921644	exon	ENST00000369535	ENSG00000213281	NRAS	---	---	---	---	---
1:114713800|114716177	0	0	0.873449	0.652309	0	0	0.29115	0.217436	-0.0737133	0.941112	0.98174	exon	ENST00000369535	ENSG00000213281	NRAS	---	---	---	---	---
8:18799295|18804898	9.17011	9.31201	8.05756	8.09339	7.9028	6.98515	8.84656	7.66045	-1.18611	0.010394	0.921644	exon	ENST00000519851,ENST00000286485,ENST00000519653,ENST00000523619,ENST00000518315,ENST00000440756,ENST00000327040	ENSG00000156011	PSD3	hsa_circ_0004458	8	18799295	18804898	-
1:114719579|114724002	0	0	0	1.09988	0	0	0	0.366626	0.366626	0.661625	0.921644	exon	ENST00000438362,ENST00000610726,ENST00000261443,ENST00000339438,ENST00000534699,ENST00000530886,ENST00000358528,ENST00000369530	ENSG00000009307	CSDE1	hsa_circ_0013645	1	114719579	114724002	-
1:114720539|114724002	0	0	0	0.652309	0	0	0	0.217436	0.217436	0.781429	0.921644	exon	ENST00000438362,ENST00000610726,ENST00000261443,ENST00000339438,ENST00000534699,ENST00000530886,ENST00000483030,ENST00000358528,ENST00000369530	ENSG00000009307	CSDE1	---	---	---	---	---
1:114720539|114730422	1.38702	0	0	0	0	0	0.46234	0	-0.46234	0.58606	0.921644	exon	ENST00000438362,ENST00000610726,ENST00000261443,ENST00000339438,ENST00000534699,ENST00000530886,ENST00000358528,ENST00000369530	ENSG00000009307	CSDE1	---	---	---	---	---
1:114725221|114732816	0	0	0	1.94801	0	0	0	0.649335	0.649335	0.47295	0.921644	exon	ENST00000438362,ENST00000610726,ENST00000261443,ENST00000339438,ENST00000534699,ENST00000530886,ENST00000358528,ENST00000369530	ENSG00000009307	CSDE1	---	---	---	---	---
1:114725221|114738072	0	1.83985	0	0	0	0	0.613285	0	-0.613285	0.494453	0.921644	exon	ENST00000438362,ENST00000610726,ENST00000261443,ENST00000339438,ENST00000534699,ENST00000530886,ENST00000358528,ENST00000369530	ENSG00000009307	CSDE1	hsa_circ_0013652	1	114725221	114738072	-
1:114730258|114734117	0	0	0	0.652309	0	0	0	0.217436	0.217436	0.781429	0.921644	exon	ENST00000438362,ENST00000610726,ENST00000261443,ENST00000339438,ENST00000534699,ENST00000530886,ENST00000358528,ENST00000369530	ENSG00000009307	CSDE1	---	---	---	---	---
1:114730258|114739890	0	0	0	1.09988	0	0	0	0.366626	0.366626	0.661625	0.921644	exon	ENST00000438362,ENST00000610726,ENST00000261443,ENST00000339438,ENST00000534699,ENST00000358528,ENST00000369530	ENSG00000009307	CSDE1	---	---	---	---	---
1:114732604|114739890	1.38702	0	0	0	0	0	0.46234	0	-0.46234	0.58606	0.921644	exon	ENST00000438362,ENST00000610726,ENST00000261443,ENST00000339438,ENST00000534699,ENST00000358528,ENST00000369530	ENSG00000009307	CSDE1	---	---	---	---	---
1:114733732|114738072	2.89947	2.62281	0	1.94801	2.84602	0	1.84076	1.59801	-0.242751	0.823939	0.938733	exon	ENST00000438362,ENST00000610726,ENST00000261443,ENST00000339438,ENST00000534699,ENST00000530886,ENST00000358528,ENST00000369530	ENSG00000009307	CSDE1	hsa_circ_0000115	1	114733732	114738072	-
1:114733732|114739890	0	0	1.80575	0	0	0	0.601917	0	-0.601917	0.475406	0.921644	exon	ENST00000438362,ENST00000610726,ENST00000261443,ENST00000339438,ENST00000534699,ENST00000358528,ENST00000369530	ENSG00000009307	CSDE1	---	---	---	---	---
1:114734442|114739890	0	0	0	0	2.03388	0	0	0.677962	0.677962	0.50093	0.921644	exon	ENST00000438362,ENST00000610726,ENST00000261443,ENST00000339438,ENST00000534699,ENST00000358528,ENST00000369530	ENSG00000009307	CSDE1	---	---	---	---	---
1:114737963|114739890	0	0	0	0	3.3625	0	0	1.12083	1.12083	0.271092	0.921644	exon	ENST00000438362,ENST00000610726,ENST00000261443,ENST00000339438,ENST00000534699,ENST00000358528,ENST00000369530	ENSG00000009307	CSDE1	---	---	---	---	---
1:114737963|114750207	2.08091	0	0	0	0	0	0.693638	0	-0.693638	0.429293	0.921644	exon	ENST00000610726,ENST00000339438,ENST00000525132,ENST00000530886,ENST00000358528,ENST00000369530	ENSG00000009307	CSDE1	---	---	---	---	---
1:114739692|114750207	2.89947	0	0	0	0	1.95955	0.966489	0.653185	-0.313304	0.759871	0.921644	exon	ENST00000610726,ENST00000339438,ENST00000525132,ENST00000358528,ENST00000369530	ENSG00000009307	CSDE1	---	---	---	---	---
1:115659641|115664268	0	1.83985	2.36742	1.09988	0	0	1.40243	0.366626	-1.0358	0.422331	0.921644	exon	ENST00000369509,ENST00000369510,ENST00000310260,ENST00000355485	ENSG00000173218	VANGL1	hsa_circ_0002623	1	115659641	115664268	+
1:115992031|116031581	0	0	1.80575	0	0	0	0.601917	0	-0.601917	0.475406	0.921644	exon	ENST00000369502,ENST00000369503	ENSG00000163393	SLC22A15	hsa_circ_0013668	1	115992031	116031581	+
1:115992031|116037388	0	0	0.873449	0	0	0	0.29115	0	-0.29115	0.69286	0.921644	exon	ENST00000369503	ENSG00000163393	SLC22A15	---	---	---	---	---
1:116019582|116027022	0	0	0	1.44098	0	0	0	0.480325	0.480325	0.5841	0.921644	exon	ENST00000369502,ENST00000369503	ENSG00000163393	SLC22A15	---	---	---	---	---
1:116031366|116037388	0	0	0	1.09988	0	0	0	0.366626	0.366626	0.661625	0.921644	exon	ENST00000369503	ENSG00000163393	SLC22A15	---	---	---	---	---
1:116384014|116401655	0	0	0	1.09988	0	0	0	0.366626	0.366626	0.661625	0.921644	exon	ENST00000295598,ENST00000537345,ENST00000369496	ENSG00000163399	ATP1A1	---	---	---	---	---
1:116389439|116395285	0	0	0	0	0	2.76104	0	0.920346	0.920346	0.321336	0.921644	exon	ENST00000295598,ENST00000537345,ENST00000369496	ENSG00000163399	ATP1A1	---	---	---	---	---
1:116396598|116398789	0	0	1.80575	0	0	0	0.601917	0	-0.601917	0.475406	0.921644	exon	ENST00000295598,ENST00000537345,ENST00000369496	ENSG00000163399	ATP1A1	---	---	---	---	---
1:116398655|116400895	0	0	0	0	0	1.28966	0	0.429887	0.429887	0.635324	0.921644	exon_intron	ENST00000493908	ENSG00000203865	ATP1A1-AS1	---	---	---	---	---
1:11658267|11658871	0	0	0	1.44098	0	0	0	0.480325	0.480325	0.5841	0.921644	exon	ENST00000251546,ENST00000251547,ENST00000376768,ENST00000376770,ENST00000376762,ENST00000376760,ENST00000475435	ENSG00000132879	FBXO44	---	---	---	---	---
1:116760402|116764606	0	0	0	0	2.03388	0	0	0.677962	0.677962	0.50093	0.921644	exon	ENST00000369478	ENSG00000116824	CD2	---	---	---	---	---
1:116966911|116974323	0	0	0.873449	0	0	0	0.29115	0	-0.29115	0.69286	0.921644	exon	ENST00000393203	ENSG00000134247	PTGFRN	---	---	---	---	---
1:117088801|117096299	0	0	0	1.71665	0	0	0	0.572217	0.572217	0.523576	0.921644	exon	ENST00000369466	ENSG00000116830	TTF2	---	---	---	---	---
1:117402186|117405645	3.4185	1.83985	0	2.14734	0	0	1.75278	0.715779	-1.037	0.542586	0.921644	exon	ENST00000356554	ENSG00000198162	MAN1A2	hsa_circ_0000116	1	117402186	117405645	+
1:117402186|117414831	0	1.83985	0	0	0	0	0.613285	0	-0.613285	0.494453	0.921644	exon	ENST00000356554	ENSG00000198162	MAN1A2	hsa_circ_0000117	1	117402186	117414831	+
10:31908172|31910563	8.66697	8.82163	8.94223	8.96271	8.54074	8.70417	8.81027	8.73587	-0.0744039	0.621307	0.921644	exon	ENST00000396144,ENST00000375250,ENST00000375245,ENST00000344936	ENSG00000165322	ARHGAP12	hsa_circ_0000231	10	31908172	31910563	-
1:117402186|117442325	4.45943	2.62281	1.41363	2.74778	0	3.94926	2.83196	2.23235	-0.599609	0.765912	0.921644	exon	ENST00000356554	ENSG00000198162	MAN1A2	hsa_circ_0000119	1	117402186	117442325	+
1:117402186|117466427	1.38702	0	1.41363	0.652309	0	2.41525	0.933551	1.02252	0.0889691	0.833781	0.941209	exon	ENST00000356554	ENSG00000198162	MAN1A2	hsa_circ_0000120	1	117402186	117466427	+
1:117405549|117420649	0	1.83985	0	0	0	0	0.613285	0	-0.613285	0.494453	0.921644	exon	ENST00000356554	ENSG00000198162	MAN1A2	hsa_circ_0013734	1	117405549	117420649	+
1:117405549|117442325	0	0	0.873449	1.71665	0	0	0.29115	0.572217	0.281068	0.768855	0.921644	exon	ENST00000356554	ENSG00000198162	MAN1A2	hsa_circ_0013735	1	117405549	117442325	+
1:117414713|117442325	1.38702	1.83985	0	0	0	0	1.07562	0	-1.07562	0.350129	0.921644	exon	ENST00000356554	ENSG00000198162	MAN1A2	hsa_circ_0013738	1	117414713	117442325	+
1:117414713|117466427	1.38702	0	0	2.74778	0	0	0.46234	0.915926	0.453586	0.640012	0.921644	exon	ENST00000356554	ENSG00000198162	MAN1A2	---	---	---	---	---
1:117420569|117466427	0	0	0	0.652309	0	0	0	0.217436	0.217436	0.781429	0.921644	exon	ENST00000356554	ENSG00000198162	MAN1A2	hsa_circ_0013742	1	117420569	117466427	+
1:117442231|117466427	0	1.83985	1.41363	0	0	1.95955	1.0845	0.653185	-0.431312	0.85195	0.947397	exon	ENST00000449370,ENST00000356554	ENSG00000198162	MAN1A2	hsa_circ_0013743	1	117442231	117466427	+
6:87215903|87218731	8.62626	8.72818	8.86452	8.7983	8.51656	8.63769	8.73966	8.65085	-0.0888073	0.524145	0.921644	exon	ENST00000369577,ENST00000339907,ENST00000369578,ENST00000524067,ENST00000485016	ENSG00000188994	ZNF292	hsa_circ_0004058	6	87215903	87218731	+
1:117466334|117502970	1.38702	0	0	0	0	0	0.46234	0	-0.46234	0.58606	0.921644	exon	ENST00000449370,ENST00000356554	ENSG00000198162	MAN1A2	---	---	---	---	---
1:117493147|117502970	2.54748	4.04251	1.80575	1.71665	2.84602	0	2.79858	1.52089	-1.27769	0.194305	0.921644	exon	ENST00000449370,ENST00000356554	ENSG00000198162	MAN1A2	---	---	---	---	---
1:117499382|117522937	0	0	0	0	2.84602	0	0	0.948672	0.948672	0.330659	0.921644	exon	ENST00000356554,ENST00000421535	ENSG00000198162	MAN1A2	---	---	---	---	---
1:117887698|117906582	0	0	0	0	0	1.95955	0	0.653185	0.653185	0.485036	0.921644	exon	ENST00000369442,ENST00000369443	ENSG00000196505	GDAP2	---	---	---	---	---
1:117896833|117906582	0	0	0	1.44098	0	0	0	0.480325	0.480325	0.5841	0.921644	exon	ENST00000493555,ENST00000369442,ENST00000369443	ENSG00000196505	GDAP2	---	---	---	---	---
1:117896833|117920424	0	0	2.36742	1.09988	2.84602	2.41525	0.789141	2.12038	1.33124	0.50119	0.921644	exon	ENST00000369442,ENST00000369443	ENSG00000196505	GDAP2	hsa_circ_0002233	1	117896833	117920424	-
1:117906506|117918736	1.38702	0	2.58309	2.14734	0	2.76104	1.32337	1.63612	0.312754	0.807832	0.934231	exon	ENST00000493555,ENST00000369442,ENST00000369443	ENSG00000196505	GDAP2	hsa_circ_0008449	1	117906506	117918736	-
12:108652272|108654410	8.70097	8.6654	8.62408	8.49421	8.77282	8.67387	8.66348	8.64696	-0.0165175	0.727073	0.921644	exon	ENST00000261401,ENST00000550542,ENST00000547361,ENST00000420959,ENST00000549772,ENST00000541050,ENST00000552030,ENST00000421578	ENSG00000110880	CORO1C	hsa_circ_0000437	12	108652272	108654410	-
1:117911994|117920424	1.38702	0	0	0	0	0	0.46234	0	-0.46234	0.58606	0.921644	exon	ENST00000369442,ENST00000369443	ENSG00000196505	GDAP2	---	---	---	---	---
1:117918597|117920424	3.1822	0	1.80575	2.32244	2.03388	0	1.66265	1.45211	-0.210541	0.713017	0.921644	exon	ENST00000369442,ENST00000369443,ENST00000494224	ENSG00000196505	GDAP2	hsa_circ_0013755	1	117918597	117920424	-
1:117941124|117943626	0	0	0	0.652309	0	0	0	0.217436	0.217436	0.781429	0.921644	exon	ENST00000349139	ENSG00000065183	WDR3	---	---	---	---	---
1:117946086|117950890	0	0	0	0	2.03388	0	0	0.677962	0.677962	0.50093	0.921644	exon	ENST00000349139	ENSG00000065183	WDR3	---	---	---	---	---
1:11796206|11801399	0	0	2.11375	0	0	0	0.704583	0	-0.704583	0.413185	0.921644	exon	ENST00000376590,ENST00000376585,ENST00000376583,ENST00000376592	ENSG00000177000	MTHFR	hsa_circ_0009860	1	11796206	11801399	-
1:11800212|11801399	0	0	0	1.94801	2.03388	0	0	1.3273	1.3273	0.266243	0.921644	exon	ENST00000376590,ENST00000376585,ENST00000376583,ENST00000376592	ENSG00000177000	MTHFR	hsa_circ_0009861	1	11800212	11801399	-
1:11803148|11803404	0	0	0	1.71665	0	0	0	0.572217	0.572217	0.523576	0.921644	exon	ENST00000423400	ENSG00000177000	MTHFR	---	---	---	---	---
1:11803149|11803404	0	0	0.873449	2.14734	0	0	0.29115	0.715779	0.424629	0.64772	0.921644	exon	ENST00000423400	ENSG00000177000	MTHFR	---	---	---	---	---
1:11823707|11827221	1.38702	0	0	1.94801	0	1.28966	0.46234	1.07922	0.616883	0.644596	0.921644	exon	ENST00000376491,ENST00000312413,ENST00000376496,ENST00000376492,ENST00000376490,ENST00000346436	ENSG00000011021	CLCN6	hsa_circ_0009865	1	11823707	11827221	+
1:11835967|11837156	0	0	0	1.09988	0	0	0	0.366626	0.366626	0.661625	0.921644	exon	ENST00000312413,ENST00000376496,ENST00000346436	ENSG00000011021	CLCN6	---	---	---	---	---
1:119042264|119076607	0	0	1.80575	0	0	0	0.601917	0	-0.601917	0.475406	0.921644	exon	ENST00000235521,ENST00000369426,ENST00000497402	ENSG00000116874	WARS2	hsa_circ_0013761	1	119042264	119076607	-
1:119146953|119150746	0	0	0	1.44098	0	0	0	0.480325	0.480325	0.5841	0.921644	exon	ENST00000413531,ENST00000418015	ENSG00000231365	RP11-418J17.1	---	---	---	---	---
1:11947976|11950520	1.38702	0	0.873449	0.652309	0	1.28966	0.753489	0.647324	-0.106165	0.929256	0.977053	exon	ENST00000449038,ENST00000196061,ENST00000429000,ENST00000358133,ENST00000485046	ENSG00000083444	PLOD1	hsa_circ_0009879	1	11947976	11950520	+
1:11947976|11958647	0	0	0	1.09988	0	0	0	0.366626	0.366626	0.661625	0.921644	exon	ENST00000196061	ENSG00000083444	PLOD1	hsa_circ_0009880	1	11947976	11958647	+
1:11949773|11950520	0	1.83985	0	1.09988	0	0	0.613285	0.366626	-0.246659	0.840168	0.941209	exon	ENST00000449038,ENST00000196061,ENST00000429000,ENST00000358133,ENST00000485046	ENSG00000083444	PLOD1	---	---	---	---	---
1:119525856|119527992	2.08091	0	3.56273	3.07585	0	1.95955	1.88121	1.67847	-0.202746	0.807963	0.934359	intergenic region	n/a	n/a	---	---	---	---	---	---
1:11956917|11958647	0	0	1.41363	0	0	0	0.471212	0	-0.471212	0.566201	0.921644	exon	ENST00000196061	ENSG00000083444	PLOD1	hsa_circ_0009894	1	11956917	11958647	+
1:11970670|11972997	0	0	0.873449	0	0	0	0.29115	0	-0.29115	0.69286	0.921644	exon	ENST00000196061	ENSG00000083444	PLOD1	hsa_circ_0009902	1	11970670	11972997	+
1:119734634|119737266	0	1.83985	3.08548	1.71665	0	0	1.64178	0.572217	-1.06956	0.37563	0.921644	exon	ENST00000369407,ENST00000369409	ENSG00000092621	PHGDH	---	---	---	---	---
1:11981974|11997421	0	0	1.80575	0	0	0	0.601917	0	-0.601917	0.475406	0.921644	exon	ENST00000235329	ENSG00000116688	MFN2	---	---	---	---	---
1:11989165|11992690	0	0	2.36742	0	0	0	0.789141	0	-0.789141	0.368163	0.921644	exon	ENST00000444836,ENST00000235329	ENSG00000116688	MFN2	hsa_circ_0009910	1	11989165	11992690	+
1:11989165|11996318	1.38702	0	0	0	0	0	0.46234	0	-0.46234	0.58606	0.921644	exon	ENST00000444836,ENST00000235329	ENSG00000116688	MFN2	hsa_circ_0009911	1	11989165	11996318	+
1:119935472|119941754	0	0	0	1.09988	0	0	0	0.366626	0.366626	0.661625	0.921644	exon	ENST00000256646	ENSG00000134250	NOTCH2	---	---	---	---	---
1:119953543|119959502	0	0	1.80575	0	0	1.28966	0.601917	0.429887	-0.17203	0.840783	0.941209	exon	ENST00000479412,ENST00000579475,ENST00000256646	ENSG00000134250	NOTCH2	---	---	---	---	---
1:119986960|120005588	0	0	0	1.44098	0	1.28966	0	0.910213	0.910213	0.436586	0.921644	exon	ENST00000479412,ENST00000579475,ENST00000256646	ENSG00000134250	NOTCH2	hsa_circ_0007526	1	119986960	120005588	-
1:119986960|120029987	0	0	0	0	2.84602	0	0	0.948672	0.948672	0.330659	0.921644	exon	ENST00000579475,ENST00000256646	ENSG00000134250	NOTCH2	---	---	---	---	---
1:119996997|120029987	0	0	0	0	3.3625	0	0	1.12083	1.12083	0.271092	0.921644	exon	ENST00000602566,ENST00000579475,ENST00000256646	ENSG00000134250	NOTCH2	hsa_circ_0006744	1	119996997	120029987	-
7:100023419|100024307	8.36867	8.71052	8.86452	8.96436	8.47951	9.06874	8.6479	8.83754	0.189631	0.450083	0.921644	exon	ENST00000482979,ENST00000324306,ENST00000426572,ENST00000620510	ENSG00000106261	ZKSCAN1	hsa_circ_0001727	7	100023419	100024307	+
1:12001401|12009726	0	0	1.80575	0	0	0	0.601917	0	-0.601917	0.475406	0.921644	exon	ENST00000444836,ENST00000235329	ENSG00000116688	MFN2	hsa_circ_0009923	1	12001401	12009726	+
1:120029906|120051779	0	3.1275	0	0.652309	0	0	1.0425	0.217436	-0.825065	0.43463	0.921644	exon	ENST00000602566	ENSG00000134250	NOTCH2	hsa_circ_0002128	1	120029906	120051779	-
1:120160384|120163370	1.38702	1.83985	0	0	2.84602	0	1.07562	0.948672	-0.126952	0.875532	0.957458	exon	ENST00000578049	ENSG00000265808	SEC22B	---	---	---	---	---
1:120417170|120417811	0	0	0	0	0	1.95955	0	0.653185	0.653185	0.485036	0.921644	intergenic region	n/a	n/a	---	---	---	---	---	---
1:120417622|120436697	0	0	0	1.09988	0	0	0	0.366626	0.366626	0.661625	0.921644	exon_intron	ENST00000583271	ENSG00000270231	NBPF8	---	---	---	---	---
1:120419850|120427847	0	1.83985	0	0	0	1.28966	0.613285	0.429887	-0.183397	0.868635	0.953201	intergenic region	n/a	n/a	---	---	---	---	---	---
1:120419850|120436697	0	0	0	1.94801	0	0	0	0.649335	0.649335	0.47295	0.921644	exon_intron	ENST00000583271	ENSG00000270231	NBPF8	---	---	---	---	---
1:120419850|120443050	0	0	0	2.74778	0	0	0	0.915926	0.915926	0.308296	0.921644	exon_intron	ENST00000583271	ENSG00000270231	NBPF8	---	---	---	---	---
1:120419850|120447841	0	3.1275	0	0	0	0	1.0425	0	-1.0425	0.267733	0.921644	exon_intron	ENST00000583271	ENSG00000270231	NBPF8	---	---	---	---	---
1:120511666|120515060	0	0	0	0	0	1.28966	0	0.429887	0.429887	0.635324	0.921644	exon	ENST00000612480	ENSG00000275131	CH17-472G23.4	---	---	---	---	---
1:120536311|120538735	0	0	1.41363	1.44098	2.84602	0	0.471212	1.429	0.957786	0.460441	0.921644	exon	ENST00000612480,ENST00000637601	ENSG00000275131	CH17-472G23.4	---	---	---	---	---
1:120548289|120549092	0	0	2.11375	0	2.84602	1.28966	0.704583	1.37856	0.673976	0.713403	0.921644	exon	ENST00000612480	ENSG00000275131	CH17-472G23.4	---	---	---	---	---
1:120573072|120579194	0	0	0	1.09988	0	0	0	0.366626	0.366626	0.661625	0.921644	exon	ENST00000612480	ENSG00000275131	CH17-472G23.4	---	---	---	---	---
1:120620355|120646928	0	0	0	1.71665	3.3625	0	0	1.69305	1.69305	0.205167	0.921644	exon	ENST00000612480	ENSG00000275131	CH17-472G23.4	---	---	---	---	---
1:120763628|120793496	2.89947	0	0	0	0	0	0.966489	0	-0.966489	0.255082	0.921644	exon	ENST00000620612,ENST00000624419	ENSG00000273136	NBPF26	---	---	---	---	---
1:120784974|120793496	1.38702	0	0	0	0	0	0.46234	0	-0.46234	0.58606	0.921644	exon	ENST00000620612,ENST00000624419	ENSG00000273136	NBPF26	---	---	---	---	---
1:121117447|121118193	0	0	0	0	0	1.95955	0	0.653185	0.653185	0.485036	0.921644	intergenic region	n/a	n/a	---	---	---	---	---	---
1:121365293|121374954	0	0	0.873449	0	0	0	0.29115	0	-0.29115	0.69286	0.921644	exon	ENST00000304465,ENST00000367123	ENSG00000171943	SRGAP2C	---	---	---	---	---
1:121373971|121374954	1.38702	0	1.80575	1.44098	0	0	1.06426	0.480325	-0.583931	0.715161	0.921644	exon	ENST00000304465,ENST00000367123	ENSG00000171943	SRGAP2C	hsa_circ_0005012	1	121373971	121374954	+
1:12188796|12193098	0	0	0	1.94801	0	0	0	0.649335	0.649335	0.47295	0.921644	exon	ENST00000376259	ENSG00000028137	TNFRSF1B	hsa_circ_0009943	1	12188796	12193098	+
6:4891713|4892379	8.48381	8.91711	8.41491	8.56343	8.26403	8.34258	8.60528	8.39001	-0.215264	0.232422	0.921644	exon	ENST00000343762,ENST00000328908,ENST00000449732,ENST00000397588	ENSG00000153046	CDYL	hsa_circ_0008285	6	4891713	4892379	+
1:12242513|12253826	2.08091	0	0	0	0	0	0.693638	0	-0.693638	0.429293	0.921644	exon	ENST00000620676,ENST00000613099	ENSG00000048707	VPS13D	---	---	---	---	---
1:12253722|12258103	0	1.83985	0.873449	0	0	0	0.904434	0	-0.904434	0.404147	0.921644	exon	ENST00000620676,ENST00000613099	ENSG00000048707	VPS13D	hsa_circ_0009955	1	12253722	12258103	+
1:12256333|12267920	0	0	1.80575	0	0	0	0.601917	0	-0.601917	0.475406	0.921644	exon	ENST00000620676,ENST00000613099	ENSG00000048707	VPS13D	---	---	---	---	---
1:12268706|12271124	1.38702	0	0	1.44098	0	0	0.46234	0.480325	0.0179858	0.959736	0.983054	exon	ENST00000620676,ENST00000613099	ENSG00000048707	VPS13D	---	---	---	---	---
1:12275825|12278038	3.4185	3.79688	2.77067	1.94801	0	3.8076	3.32868	1.91854	-1.41015	0.426323	0.921644	exon	ENST00000620676,ENST00000613099	ENSG00000048707	VPS13D	hsa_circ_0009964	1	12275825	12278038	+
1:12282705|12288313	0	0	0	1.94801	0	0	0	0.649335	0.649335	0.47295	0.921644	exon	ENST00000011700,ENST00000620676,ENST00000613099	ENSG00000048707	VPS13D	---	---	---	---	---
1:12290998|12304728	0	0	2.36742	0	0	0	0.789141	0	-0.789141	0.368163	0.921644	exon	ENST00000011700,ENST00000620676,ENST00000613099	ENSG00000048707	VPS13D	---	---	---	---	---
1:12290998|12308641	0	1.83985	0	0	0	0	0.613285	0	-0.613285	0.494453	0.921644	exon	ENST00000011700,ENST00000620676,ENST00000613099	ENSG00000048707	VPS13D	---	---	---	---	---
1:12293524|12308641	0	0	0	0	2.03388	0	0	0.677962	0.677962	0.50093	0.921644	exon	ENST00000011700,ENST00000620676,ENST00000613099	ENSG00000048707	VPS13D	---	---	---	---	---
1:12299202|12304728	0	0	2.11375	2.14734	2.03388	0	0.704583	1.39374	0.689157	0.746956	0.921644	exon	ENST00000011700,ENST00000620676,ENST00000613099	ENSG00000048707	VPS13D	hsa_circ_0007677	1	12299202	12304728	+
10:101667886|101676436	8.30377	8.5707	8.71829	8.46182	8.15859	8.48318	8.53092	8.36786	-0.163055	0.341722	0.921644	exon	ENST00000457105,ENST00000331272	ENSG00000107829	FBXW4	hsa_circ_0008362	10	101667886	101676436	-
1:12299202|12311625	0	1.83985	0	0	0	0	0.613285	0	-0.613285	0.494453	0.921644	exon	ENST00000011700,ENST00000620676,ENST00000613099	ENSG00000048707	VPS13D	---	---	---	---	---
1:12299202|12311925	0	0	1.41363	1.09988	0	2.76104	0.471212	1.28697	0.81576	0.482477	0.921644	exon	ENST00000011700,ENST00000620676,ENST00000613099	ENSG00000048707	VPS13D	---	---	---	---	---
1:12299202|12319630	0	0	0	1.09988	0	0	0	0.366626	0.366626	0.661625	0.921644	exon	ENST00000011700,ENST00000620676,ENST00000613099	ENSG00000048707	VPS13D	---	---	---	---	---
1:12299202|12321964	0	0	0	0	0	1.28966	0	0.429887	0.429887	0.635324	0.921644	exon	ENST00000011700,ENST00000620676,ENST00000613099	ENSG00000048707	VPS13D	hsa_circ_0009972	1	12299202	12321964	+
1:12299202|12323780	0	0	2.11375	0	0	3.03976	0.704583	1.01325	0.30867	0.786272	0.925297	exon	ENST00000011700,ENST00000620676,ENST00000613099	ENSG00000048707	VPS13D	hsa_circ_0009974	1	12299202	12323780	+
1:12311454|12311925	0	3.79688	1.41363	0.652309	2.84602	0	1.73684	1.16611	-0.570729	0.570124	0.921644	exon	ENST00000011700,ENST00000620676,ENST00000613099,ENST00000460333	ENSG00000048707	VPS13D	---	---	---	---	---
1:12311454|12329918	0	0	0	0.652309	0	0	0	0.217436	0.217436	0.781429	0.921644	exon	ENST00000011700,ENST00000620676,ENST00000613099,ENST00000460333	ENSG00000048707	VPS13D	---	---	---	---	---
1:12318072|12321964	2.89947	1.83985	1.80575	2.74778	0	1.28966	2.18169	1.34581	-0.835878	0.71284	0.921644	exon	ENST00000487188,ENST00000011700,ENST00000620676,ENST00000613099,ENST00000460333	ENSG00000048707	VPS13D	hsa_circ_0009985	1	12318072	12321964	+
1:12318072|12322746	0	2.62281	3.75281	3.17049	0	2.41525	2.12521	1.86192	-0.26329	0.794234	0.930601	exon	ENST00000487188,ENST00000011700,ENST00000620676,ENST00000613099,ENST00000460333	ENSG00000048707	VPS13D	hsa_circ_0009986	1	12318072	12322746	+
1:12318072|12323780	0	2.62281	2.36742	1.44098	0	1.28966	1.66341	0.910213	-0.753197	0.468118	0.921644	exon	ENST00000487188,ENST00000011700,ENST00000620676,ENST00000613099,ENST00000460333	ENSG00000048707	VPS13D	hsa_circ_0009987	1	12318072	12323780	+
1:12318072|12341885	0	0	0	1.44098	0	0	0	0.480325	0.480325	0.5841	0.921644	exon	ENST00000011700,ENST00000620676,ENST00000613099,ENST00000460333	ENSG00000048707	VPS13D	---	---	---	---	---
1:12322536|12323780	3.4185	0	0	1.09988	0	1.28966	1.1395	0.796513	-0.342985	0.503974	0.921644	exon	ENST00000487188,ENST00000011700,ENST00000620676,ENST00000613099,ENST00000460333	ENSG00000048707	VPS13D	hsa_circ_0009995	1	12322536	12323780	+
1:12322536|12329918	1.38702	0	1.80575	1.71665	0	0	1.06426	0.572217	-0.49204	0.798416	0.931732	exon	ENST00000487188,ENST00000011700,ENST00000620676,ENST00000613099,ENST00000460333	ENSG00000048707	VPS13D	hsa_circ_0007588	1	12322536	12329918	+
1:12322536|12333366	0	0	0	1.44098	0	0	0	0.480325	0.480325	0.5841	0.921644	exon	ENST00000487188,ENST00000011700,ENST00000620676,ENST00000613099,ENST00000460333	ENSG00000048707	VPS13D	---	---	---	---	---
1:12341783|12416827	0	0	0.873449	0	0	0	0.29115	0	-0.29115	0.69286	0.921644	exon	ENST00000011700,ENST00000620676,ENST00000613099	ENSG00000048707	VPS13D	---	---	---	---	---
1:12355899|12363247	0	0	0	0	2.03388	0	0	0.677962	0.677962	0.50093	0.921644	exon	ENST00000011700,ENST00000620676,ENST00000613099,ENST00000460333	ENSG00000048707	VPS13D	hsa_circ_0010003	1	12355899	12363247	+
1:12362720|12363247	0	0	0	1.09988	2.03388	1.28966	0	1.47447	1.47447	0.241137	0.921644	exon	ENST00000011700,ENST00000620676,ENST00000613099,ENST00000460333	ENSG00000048707	VPS13D	---	---	---	---	---
1:12362720|12373858	0	0	0	0	0	1.28966	0	0.429887	0.429887	0.635324	0.921644	exon	ENST00000011700,ENST00000620676,ENST00000613099	ENSG00000048707	VPS13D	---	---	---	---	---
1:12362720|12378591	0	0	0	0	3.3625	0	0	1.12083	1.12083	0.271092	0.921644	exon	ENST00000011700,ENST00000620676,ENST00000613099	ENSG00000048707	VPS13D	hsa_circ_0010005	1	12362720	12378591	+
1:12362720|12416827	2.08091	0	1.80575	0	0	0	1.29556	0	-1.29556	0.235651	0.921644	exon	ENST00000011700,ENST00000620676,ENST00000613099	ENSG00000048707	VPS13D	---	---	---	---	---
1:12368468|12416827	0	2.62281	0	0	0	0	0.874269	0	-0.874269	0.339128	0.921644	exon	ENST00000011700,ENST00000620676,ENST00000543710,ENST00000613099	ENSG00000048707	VPS13D	---	---	---	---	---
1:12382976|12416827	0	0	0	0	2.84602	0	0	0.948672	0.948672	0.330659	0.921644	exon	ENST00000011700,ENST00000620676,ENST00000543710,ENST00000613099	ENSG00000048707	VPS13D	---	---	---	---	---
1:12400181|12403973	0	0	0	1.44098	2.03388	0	0	1.15829	1.15829	0.34275	0.921644	exon	ENST00000011700,ENST00000620676,ENST00000543710,ENST00000613099	ENSG00000048707	VPS13D	---	---	---	---	---
1:41070595|41075451	8.03722	8.71052	8.76318	8.68062	8.65592	8.90012	8.50364	8.74555	0.24191	0.441201	0.921644	exon	ENST00000361191,ENST00000402904,ENST00000372597,ENST00000397171,ENST00000372595,ENST00000456518,ENST00000326197,ENST00000361705,ENST00000397174,ENST00000337495,ENST00000372596	ENSG00000010803	SCMH1	hsa_circ_0000061	1	41070595	41075451	-
1:12415087|12416827	0	0	0	0	0	2.76104	0	0.920346	0.920346	0.321336	0.921644	exon	ENST00000011700,ENST00000476045,ENST00000620676,ENST00000543710,ENST00000613099,ENST00000481484	ENSG00000048707	VPS13D	---	---	---	---	---
1:12455998|12460396	0	0	0	1.09988	0	0	0	0.366626	0.366626	0.661625	0.921644	exon	ENST00000011700,ENST00000620676,ENST00000543710,ENST00000613099	ENSG00000048707	VPS13D	---	---	---	---	---
1:1256045|1267992	0	1.83985	0	0	0	0	0.613285	0	-0.613285	0.494453	0.921644	exon	ENST00000473215,ENST00000360466,ENST00000349431,ENST00000464036,ENST00000347370,ENST00000400930,ENST00000435198,ENST00000450390	ENSG00000160087	UBE2J2	hsa_circ_0009246	1	1256045	1267992	-
1:1256992|1257310	0	3.1275	2.77067	1.94801	0	0	1.96606	0.649335	-1.31672	0.402617	0.921644	exon	ENST00000473215,ENST00000360466,ENST00000349431,ENST00000464036,ENST00000347370,ENST00000400930,ENST00000435198,ENST00000466752,ENST00000400929,ENST00000491779,ENST00000450390	ENSG00000160087	UBE2J2	hsa_circ_0008063	1	1256992	1257310	-
1:1256992|1263386	0	2.62281	0	0	0	0	0.874269	0	-0.874269	0.339128	0.921644	exon	ENST00000473215,ENST00000360466,ENST00000349431,ENST00000464036,ENST00000347370,ENST00000400930,ENST00000435198,ENST00000466752,ENST00000400929,ENST00000509720,ENST00000450390	ENSG00000160087	UBE2J2	hsa_circ_0009248	1	1256992	1263386	-
1:1256992|1267992	2.08091	0	0	2.14734	0	1.95955	0.693638	1.36896	0.675325	0.686236	0.921644	exon	ENST00000473215,ENST00000360466,ENST00000349431,ENST00000464036,ENST00000347370,ENST00000400930,ENST00000435198,ENST00000466752,ENST00000450390	ENSG00000160087	UBE2J2	hsa_circ_0009250	1	1256992	1267992	-
1:12572728|12579412	0	1.83985	0.873449	1.09988	0	0	0.904434	0.366626	-0.537809	0.718118	0.921644	exon	ENST00000616661	ENSG00000162496	DHRS3	hsa_circ_0010020	1	12572728	12579412	-
1:12572728|12580666	0	1.83985	0	0	0	0	0.613285	0	-0.613285	0.494453	0.921644	exon	ENST00000464917,ENST00000616661	ENSG00000162496	DHRS3	hsa_circ_0010021	1	12572728	12580666	-
3:170136419|170149244	8.4035	8.40491	8.43932	8.28273	8.47951	8.23601	8.41591	8.33275	-0.0831601	0.481558	0.921644	exon	ENST00000494943,ENST00000495893,ENST00000479467	ENSG00000173889	PHC3	hsa_circ_0001359	3	170136419	170149244	-
1:12578718|12580666	2.54748	0	3.6609	2.97456	3.3625	3.8076	2.06946	3.38155	1.31209	0.489578	0.921644	exon	ENST00000616661,ENST00000430996	ENSG00000162496	DHRS3	hsa_circ_0010024	1	12578718	12580666	-
1:1262269|1263386	0	1.83985	0	0	0	0	0.613285	0	-0.613285	0.494453	0.921644	exon	ENST00000464036,ENST00000503294,ENST00000477894	ENSG00000160087	UBE2J2	---	---	---	---	---
1:1279149|1279230	0	0	1.41363	0	0	0	0.471212	0	-0.471212	0.566201	0.921644	exon	ENST00000453732	ENSG00000230415	RP5-902P8.10	---	---	---	---	---
1:1296211|1298113	0	1.83985	0	0	0	1.95955	0.613285	0.653185	0.0398999	0.943118	0.98174	exon	ENST00000354700,ENST00000492936,ENST00000353662,ENST00000467278	ENSG00000131584	ACAP3	---	---	---	---	---
1:13595827|13607306	0	0	0	1.71665	0	0	0	0.572217	0.572217	0.523576	0.921644	exon	ENST00000513143	ENSG00000162493	PDPN	---	---	---	---	---
1:13607173|13614405	0	0	1.41363	1.44098	0	3.27325	0.471212	1.57141	1.1002	0.284195	0.921644	exon	ENST00000487038,ENST00000376061,ENST00000488631,ENST00000621990,ENST00000475043,ENST00000513143,ENST00000376057,ENST00000617617,ENST00000509009,ENST00000294489,ENST00000510906	ENSG00000162493	PDPN	---	---	---	---	---
1:13607173|13614411	0	2.62281	0	0	0	0	0.874269	0	-0.874269	0.339128	0.921644	exon	ENST00000487038,ENST00000376061,ENST00000621990,ENST00000513143,ENST00000617617,ENST00000509009,ENST00000294489,ENST00000510906	ENSG00000162493	PDPN	---	---	---	---	---
1:13610387|13614411	0	0	1.80575	0	0	0	0.601917	0	-0.601917	0.475406	0.921644	exon	ENST00000487038,ENST00000376061,ENST00000621990,ENST00000513143,ENST00000617617,ENST00000509009,ENST00000294489,ENST00000510906	ENSG00000162493	PDPN	---	---	---	---	---
15:25405461|25411971	7.99217	8.44818	8.80135	8.31417	8.61094	8.69916	8.4139	8.54142	0.127524	0.83859	0.941209	exon	ENST00000428984,ENST00000566215,ENST00000628267,ENST00000630424,ENST00000397954,ENST00000438097,ENST00000629252,ENST00000626793,ENST00000637886,ENST00000614096,ENST00000638155,ENST00000630907,ENST00000629886,ENST00000638011	ENSG00000114062	UBE3A	hsa_circ_0000586	15	25405461	25411971	-
22:45729425|45740538	8.18868	7.833	9.05485	8.48273	8.09469	8.44182	8.35884	8.33975	-0.0190957	0.718809	0.921644	exon	ENST00000483549,ENST00000252934,ENST00000381061	ENSG00000130638	ATXN10	hsa_circ_0001247	22	45729425	45740538	+
1:13715541|13773188	0	0	0	1.44098	0	0	0	0.480325	0.480325	0.5841	0.921644	exon	ENST00000311066,ENST00000235372	ENSG00000116731	PRDM2	---	---	---	---	---
3:138570318|138572932	8.27397	8.37159	8.17435	7.68413	8.26403	8.14322	8.2733	8.03046	-0.242843	0.180114	0.921644	exon	ENST00000484888,ENST00000481834,ENST00000478673,ENST00000464035,ENST00000264982	ENSG00000114107	CEP70	hsa_circ_0004524	3	138570318	138572932	-
12:27714780|27724186	8.02832	8.69264	8.03027	7.76977	8.32099	8.1284	8.25041	8.07305	-0.177361	0.305253	0.921644	exon	ENST00000081029,ENST00000538315,ENST00000542199	ENSG00000061794	MRPS35	hsa_circ_0000384	12	27714780	27724186	+
1:13731000|13773188	0	1.83985	0	0	0	0	0.613285	0	-0.613285	0.494453	0.921644	exon	ENST00000311066,ENST00000235372	ENSG00000116731	PRDM2	---	---	---	---	---
1:13742005|13749487	0	0	0	2.32244	2.84602	0	0	1.72282	1.72282	0.196626	0.921644	exon	ENST00000311066,ENST00000502724,ENST00000235372,ENST00000502727,ENST00000376048,ENST00000491134	ENSG00000116731	PRDM2	---	---	---	---	---
1:13742005|13773188	0	0	0	0	2.84602	0	0	0.948672	0.948672	0.330659	0.921644	exon	ENST00000311066,ENST00000235372,ENST00000502727,ENST00000491134	ENSG00000116731	PRDM2	---	---	---	---	---
1:13749361|13773188	0	0	0	0	0	1.95955	0	0.653185	0.653185	0.485036	0.921644	exon	ENST00000311066,ENST00000235372,ENST00000502727,ENST00000491134	ENSG00000116731	PRDM2	---	---	---	---	---
1:13769118|13773188	0	0	3.34375	1.09988	0	2.41525	1.11458	1.17171	0.057126	0.775254	0.921644	exon	ENST00000343137,ENST00000407521,ENST00000491134,ENST00000503842	ENSG00000116731	PRDM2	hsa_circ_0005888	1	13769118	13773188	+
1:1390891|1391296	0	0	1.41363	1.71665	0	0	0.471212	0.572217	0.101006	0.908401	0.971481	exon	ENST00000418865,ENST00000482365,ENST00000496007,ENST00000481223	ENSG00000221978	CCNL2	---	---	---	---	---
1:143747671|143750635	0	0	0	0	2.84602	0	0	0.948672	0.948672	0.330659	0.921644	exon	ENST00000442049	ENSG00000223779	RP11-403I13.4	---	---	---	---	---
1:143974544|143975153	0	0	1.80575	0	0	0	0.601917	0	-0.601917	0.475406	0.921644	exon_intron	ENST00000605551	ENSG00000270872	SRGAP2D	---	---	---	---	---
1:144054438|144055421	0	2.62281	3.08548	2.97456	3.3625	1.28966	1.90276	2.54224	0.639477	0.762064	0.921644	exon	ENST00000605551	ENSG00000270872	SRGAP2D	---	---	---	---	---
1:144054438|144063394	0	0	0	0	0	1.28966	0	0.429887	0.429887	0.635324	0.921644	exon	ENST00000605551	ENSG00000270872	SRGAP2D	---	---	---	---	---
1:144448775|144450870	0	0	2.11375	0	0	0	0.704583	0	-0.704583	0.413185	0.921644	exon_intron	ENST00000478419,ENST00000578953,ENST00000584575,ENST00000581897,ENST00000584793,ENST00000577412,ENST00000579734,ENST00000488031	ENSG00000266338	NBPF15	---	---	---	---	---
1:144893408|144914754	0	0	0	0.652309	0	0	0	0.217436	0.217436	0.781429	0.921644	exon	ENST00000619678,ENST00000612199	ENSG00000196369	SRGAP2B	---	---	---	---	---
1:144905091|144906074	2.89947	3.1275	2.11375	2.61944	2.03388	0	2.71357	1.55111	-1.16246	0.410964	0.921644	exon	ENST00000619678,ENST00000612199	ENSG00000196369	SRGAP2B	---	---	---	---	---
1:144905091|144914754	0	0	0.873449	0	0	0	0.29115	0	-0.29115	0.69286	0.921644	exon	ENST00000621582,ENST00000619678,ENST00000612199	ENSG00000196369	SRGAP2B	---	---	---	---	---
1:144905091|144955601	2.08091	0	0	0	0	0	0.693638	0	-0.693638	0.429293	0.921644	exon	ENST00000612199	ENSG00000196369	SRGAP2B	---	---	---	---	---
1:144955439|144960398	0	0	0	1.44098	0	1.28966	0	0.910213	0.910213	0.436586	0.921644	exon_intron	ENST00000621582,ENST00000612199	ENSG00000196369	SRGAP2B	---	---	---	---	---
1:145092835|145093443	2.08091	0	1.80575	0	0	0	1.29556	0	-1.29556	0.235651	0.921644	exon	ENST00000612199	ENSG00000196369	SRGAP2B	---	---	---	---	---
1:145616234|145631744	0	2.62281	0.873449	0	0	1.28966	1.16542	0.429887	-0.735531	0.512971	0.921644	exon	ENST00000313835,ENST00000460277,ENST00000528944,ENST00000462900,ENST00000534502	ENSG00000117262	GPR89A	---	---	---	---	---
1:145623054|145631744	0	0	0.873449	0	0	0	0.29115	0	-0.29115	0.69286	0.921644	exon	ENST00000313835,ENST00000460277,ENST00000528944,ENST00000462900,ENST00000534502,ENST00000466593	ENSG00000117262	GPR89A	---	---	---	---	---
1:145623054|145643978	0	0	1.41363	0	0	0	0.471212	0	-0.471212	0.566201	0.921644	exon	ENST00000313835,ENST00000460277,ENST00000528944,ENST00000462900,ENST00000534502,ENST00000466593	ENSG00000117262	GPR89A	---	---	---	---	---
1:145623593|145665651	0	0	0	1.94801	0	0	0	0.649335	0.649335	0.47295	0.921644	exon	ENST00000460277	ENSG00000117262	GPR89A	---	---	---	---	---
1:145630687|145647267	0	0	0	0	0	1.95955	0	0.653185	0.653185	0.485036	0.921644	exon	ENST00000313835,ENST00000460277,ENST00000462900,ENST00000478703,ENST00000534502	ENSG00000117262	GPR89A	---	---	---	---	---
1:145631664|145647267	0	0	0	0.652309	0	0	0	0.217436	0.217436	0.781429	0.921644	exon	ENST00000313835,ENST00000460277,ENST00000462900,ENST00000478703,ENST00000534502	ENSG00000117262	GPR89A	---	---	---	---	---
1:145631664|145665651	0	0	3.92074	2.47857	3.3625	3.6505	1.30691	3.16385	1.85694	0.711079	0.921644	exon	ENST00000313835,ENST00000460277,ENST00000462900,ENST00000534502	ENSG00000117262	GPR89A	hsa_circ_0013926	1	145631664	145665651	+
2:61522611|61533903	8.87981	8.04512	7.74148	7.61429	8.18951	8.27017	8.22214	8.02466	-0.197481	0.447621	0.921644	exon	ENST00000428210,ENST00000420673,ENST00000451765,ENST00000404992,ENST00000401558,ENST00000443240,ENST00000406957	ENSG00000082898	XPO1	hsa_circ_0001017	2	61522611	61533903	-
1:145643869|145663424	1.38702	0	0	1.44098	0	0	0.46234	0.480325	0.0179858	0.959736	0.983054	exon	ENST00000313835,ENST00000460277,ENST00000462900,ENST00000534502	ENSG00000117262	GPR89A	---	---	---	---	---
1:145643869|145665651	2.08091	1.83985	1.80575	3.07585	0	3.03976	1.90884	2.03854	0.129697	0.497889	0.921644	exon	ENST00000313835,ENST00000460277,ENST00000462900,ENST00000534502	ENSG00000117262	GPR89A	hsa_circ_0013925	1	145643869	145665651	+
1:145747995|145771919	0	0	1.80575	0	0	0	0.601917	0	-0.601917	0.475406	0.921644	exon	ENST00000539368,ENST00000582693	ENSG00000265491	RNF115	hsa_circ_0013920	1	145747995	145771919	-
1:145747995|145784596	0	0	0	1.09988	0	0	0	0.366626	0.366626	0.661625	0.921644	exon	ENST00000582693	ENSG00000265491	RNF115	---	---	---	---	---
1:145747995|145788966	0	0	0	1.09988	0	0	0	0.366626	0.366626	0.661625	0.921644	exon	ENST00000582693	ENSG00000265491	RNF115	hsa_circ_0000125	1	145747995	145788966	-
1:145750407|145788966	0	1.83985	0	1.09988	2.03388	2.41525	0.613285	1.84967	1.23639	0.388933	0.921644	exon	ENST00000582693	ENSG00000265491	RNF115	---	---	---	---	---
1:145771711|145788966	3.1822	2.62281	0	2.32244	4.2906	0	1.935	2.20435	0.269344	0.763681	0.921644	exon	ENST00000582693	ENSG00000265491	RNF115	---	---	---	---	---
1:145825757|145827005	0	0	2.36742	2.61944	0	1.28966	0.789141	1.30304	0.513895	0.790396	0.92797	exon	ENST00000334163,ENST00000369294,ENST00000466003,ENST00000471254	ENSG00000186141	POLR3C	hsa_circ_0013916	1	145825757	145827005	+
1:145837597|145838042	0	0	0	1.09988	0	0	0	0.366626	0.366626	0.661625	0.921644	intron	ENST00000334163,ENST00000369294,ENST00000489436	ENSG00000186141	POLR3C	---	---	---	---	---
1:145838056|145841071	2.08091	0	1.80575	2.47857	0	0	1.29556	0.826191	-0.469365	0.917346	0.976003	exon	ENST00000334163	ENSG00000186141	POLR3C	hsa_circ_0002679	1	145838056	145841071	+
18:12999421|13019206	8.32573	8.36031	7.9597	8.65834	8.18951	8.01211	8.21524	8.28665	0.071408	0.780207	0.921644	exon	ENST00000506447,ENST00000325971	ENSG00000101639	CEP192	hsa_circ_0000831	18	12999421	13019206	+
1:145850609|145850770	1.38702	0	0	0	0	0	0.46234	0	-0.46234	0.58606	0.921644	exon_intron	ENST00000616799	ENSG00000278549	MIR6736	---	---	---	---	---
1:145853504|145854880	0	3.1275	0.873449	0	2.84602	3.27325	1.33365	2.03976	0.706106	0.733613	0.921644	exon	ENST00000393045,ENST00000369298	ENSG00000131788	PIAS3	---	---	---	---	---
1:145854746|145856431	0	0	0.873449	0	0	1.95955	0.29115	0.653185	0.362035	0.722168	0.921644	exon	ENST00000393045,ENST00000393046,ENST00000369298,ENST00000498436,ENST00000369299,ENST00000484423	ENSG00000131788	PIAS3	---	---	---	---	---
1:145906394|145907465	0	0	0	0	0	1.95955	0	0.653185	0.653185	0.485036	0.921644	exon	ENST00000468261,ENST00000369304	ENSG00000143127	ITGA10	---	---	---	---	---
1:145925403|145925878	0	0	0	1.09988	0	0	0	0.366626	0.366626	0.661625	0.921644	exon	ENST00000583313	ENSG00000265241	RBM8A	---	---	---	---	---
1:145942713|145947782	2.08091	1.83985	0	0.652309	3.74203	3.03976	1.30692	2.47803	1.17111	0.221998	0.921644	exon	ENST00000604000	ENSG00000271601	LIX1L	hsa_circ_0005549	1	145942713	145947782	-
1:145974825|145975436	3.1822	0	3.22039	1.94801	2.03388	2.41525	2.1342	2.13238	-0.00181414	0.526722	0.921644	exon	ENST00000369314,ENST00000369313	ENSG00000121851	POLR3GL	---	---	---	---	---
1:146126236|146132237	0	1.83985	0	0	0	0	0.613285	0	-0.613285	0.494453	0.921644	exon	ENST00000616399,ENST00000617010,ENST00000583866	ENSG00000271425	NBPF10	---	---	---	---	---
1:146156480|146211129	0	1.83985	0	0	0	0	0.613285	0	-0.613285	0.494453	0.921644	exon	ENST00000578207	ENSG00000264343	NOTCH2NL	hsa_circ_0005431	1	146156480	146211129	-
1:146164751|146189381	0	0	1.80575	0	0	0	0.601917	0	-0.601917	0.475406	0.921644	exon	ENST00000578207,ENST00000362074,ENST00000612520,ENST00000579793	ENSG00000264343,ENSG00000213240	NOTCH2NL,RP11-458D21.5	---	---	---	---	---
1:146164751|146211129	0	0	0	0	0	1.95955	0	0.653185	0.653185	0.485036	0.921644	exon	ENST00000578207	ENSG00000264343	NOTCH2NL	---	---	---	---	---
1:146189300|146211129	0	1.83985	0	2.32244	2.03388	1.28966	0.613285	1.882	1.26871	0.378423	0.921644	exon	ENST00000578207	ENSG00000264343	NOTCH2NL	hsa_circ_0002262	1	146189300	146211129	-
1:146617029|146650451	0	0	0.873449	2.61944	2.03388	3.03976	0.29115	2.56436	2.27321	0.045823	0.921644	exon	ENST00000614586	ENSG00000276975	HYDIN2	---	---	---	---	---
1:146690959|146693143	0	0	0	0	0	1.28966	0	0.429887	0.429887	0.635324	0.921644	exon	ENST00000614586	ENSG00000276975	HYDIN2	---	---	---	---	---
1:146773531|146776736	0	0	0	1.09988	0	0	0	0.366626	0.366626	0.661625	0.921644	exon	ENST00000614586	ENSG00000276975	HYDIN2	---	---	---	---	---
1:146885654|146888224	0	0	0	0	0	1.95955	0	0.653185	0.653185	0.485036	0.921644	exon	ENST00000614586	ENSG00000276975	HYDIN2	---	---	---	---	---
1:146943291|146952037	0	0	0	0.652309	0	1.28966	0	0.647324	0.647324	0.555025	0.921644	exon	ENST00000617931	ENSG00000268043	NBPF12	---	---	---	---	---
1:146943291|146960318	0	0	0	0	2.03388	0	0	0.677962	0.677962	0.50093	0.921644	exon	ENST00000617931	ENSG00000268043	NBPF12	---	---	---	---	---
1:147161712|147167933	0	0	0	0	3.3625	0	0	1.12083	1.12083	0.271092	0.921644	exon	ENST00000254101	ENSG00000131791	PRKAB2	---	---	---	---	---
1:147190177|147213470	1.38702	0	0	0	3.3625	0	0.46234	1.12083	0.658492	0.54886	0.921644	exon	ENST00000369272,ENST00000441068,ENST00000578284,ENST00000527849,ENST00000254090	ENSG00000131781	FMO5	---	---	---	---	---
1:147190177|147225066	0	0	0	0.652309	0	0	0	0.217436	0.217436	0.781429	0.921644	exon	ENST00000369272,ENST00000441068,ENST00000578284,ENST00000527849,ENST00000254090	ENSG00000131781	FMO5	---	---	---	---	---
1:147208852|147225066	0	2.62281	0	0	0	0	0.874269	0	-0.874269	0.339128	0.921644	exon	ENST00000369272,ENST00000441068,ENST00000578284,ENST00000527849,ENST00000254090,ENST00000619062	ENSG00000131781	FMO5	---	---	---	---	---
4:143543509|143543972	8.64385	8.58045	7.40857	8.77213	9.0421	7.90314	8.21096	8.57246	0.361497	0.541436	0.921644	exon	ENST00000283131	ENSG00000153147	SMARCA5	hsa_circ_0001445	4	143543509	143543972	+
1:147259837|147280191	0	0	0	1.09988	0	0	0	0.366626	0.366626	0.661625	0.921644	exon	ENST00000488864,ENST00000431239,ENST00000361293,ENST00000622533,ENST00000369258,ENST00000467213	ENSG00000131778	CHD1L	---	---	---	---	---
1:147264422|147280191	0	0	0	1.09988	0	0	0	0.366626	0.366626	0.661625	0.921644	exon	ENST00000431239,ENST00000622533,ENST00000369258,ENST00000467213	ENSG00000131778	CHD1L	---	---	---	---	---
1:147275354|147285487	2.54748	0	1.41363	2.74778	0	0	1.32037	0.915926	-0.404446	0.963863	0.98582	exon	ENST00000488864,ENST00000431239,ENST00000369259,ENST00000361293,ENST00000622533,ENST00000369258,ENST00000467213	ENSG00000131778	CHD1L	hsa_circ_0013953	1	147275354	147285487	+
1:147286298|147287733	0	0	0.873449	0	0	0	0.29115	0	-0.29115	0.69286	0.921644	exon	ENST00000488864,ENST00000431239,ENST00000369259,ENST00000361293,ENST00000622533,ENST00000369258,ENST00000467213	ENSG00000131778	CHD1L	hsa_circ_0006296	1	147286298	147287733	+
3:125313308|125331238	8.4172	8.67454	7.50424	7.99013	7.3115	7.80403	8.19866	7.70189	-0.496769	0.157871	0.921644	exon	ENST00000360647,ENST00000485866,ENST00000484491	ENSG00000163848	ZNF148	hsa_circ_0001333	3	125313308	125331238	-
1:147650143|147659775	2.08091	1.83985	0	1.09988	3.3625	2.41525	1.30692	2.29254	0.985618	0.39648	0.921644	exon	ENST00000487562,ENST00000583509,ENST00000613673	ENSG00000162836	ACP6	---	---	---	---	---
1:147936627|147969959	1.38702	0	0	0	0	0	0.46234	0	-0.46234	0.58606	0.921644	exon	ENST00000488165,ENST00000478307,ENST00000314163	ENSG00000188092	GPR89B	---	---	---	---	---
1:147953345|147969959	1.38702	0	2.36742	0	0	0	1.25148	0	-1.25148	0.232376	0.921644	exon	ENST00000488165,ENST00000491975,ENST00000478307,ENST00000314163	ENSG00000188092	GPR89B	---	---	---	---	---
1:147954322|147988521	1.38702	0	0	0	0	1.28966	0.46234	0.429887	-0.0324521	0.980058	0.991303	exon	ENST00000488165,ENST00000478307,ENST00000314163	ENSG00000188092	GPR89B	hsa_circ_0013964	1	147954322	147988521	+
1:147966554|147969959	0	0	2.11375	2.14734	0	1.95955	0.704583	1.36896	0.66438	0.7301	0.921644	exon	ENST00000488165,ENST00000491975,ENST00000461786,ENST00000478307,ENST00000314163	ENSG00000188092	GPR89B	hsa_circ_0008553	1	147966554	147969959	+
1:147966554|147988521	0	0	1.41363	0.652309	0	0	0.471212	0.217436	-0.253775	0.800965	0.931732	exon	ENST00000488165,ENST00000478307,ENST00000314163	ENSG00000188092	GPR89B	hsa_circ_0013930	1	147966554	147988521	+
1:147986199|147988521	0	0	0	1.94801	0	3.47417	0	1.80739	1.80739	0.15215	0.921644	exon	ENST00000488165,ENST00000478307,ENST00000488603,ENST00000314163,ENST00000490955	ENSG00000188092	GPR89B	hsa_circ_0008497	1	147986199	147988521	+
1:148114437|148116535	0	0	0	0.652309	0	0	0	0.217436	0.217436	0.781429	0.921644	exon	ENST00000614506,ENST00000615281,ENST00000613531,ENST00000614785,ENST00000614015	ENSG00000263956	NBPF11	---	---	---	---	---
1:148122055|148143686	2.54748	2.62281	0	1.09988	0	0	1.72343	0.366626	-1.3568	0.255673	0.921644	exon	ENST00000614506,ENST00000615281	ENSG00000263956	NBPF11	---	---	---	---	---
1:148126829|148143686	2.08091	1.83985	0	2.14734	2.03388	0	1.30692	1.39374	0.0868174	0.931253	0.977273	exon	ENST00000614506,ENST00000615281	ENSG00000263956	NBPF11	---	---	---	---	---
1:148135672|148143686	2.08091	3.1275	3.08548	2.14734	0	3.47417	2.76463	1.87384	-0.890798	0.716892	0.921644	exon	ENST00000614506,ENST00000615281	ENSG00000263956	NBPF11	hsa_circ_0007740	1	148135672	148143686	-
1:148143415|148145099	0	1.83985	0	0	0	0	0.613285	0	-0.613285	0.494453	0.921644	exon_intron	ENST00000614506,ENST00000615281	ENSG00000263956	NBPF11	---	---	---	---	---
1:148216937|148228657	0	0	0.873449	0	0	0	0.29115	0	-0.29115	0.69286	0.921644	exon	ENST00000611286,ENST00000611617	ENSG00000227733	RP4-565E6.1	---	---	---	---	---
1:148584471|148587403	1.38702	0	0	0	0	0	0.46234	0	-0.46234	0.58606	0.921644	exon	ENST00000616120,ENST00000614329,ENST00000619423,ENST00000620240,ENST00000614999,ENST00000581201,ENST00000621070	ENSG00000270629	NBPF14	---	---	---	---	---
1:148615691|148640089	0	0	0	1.44098	0	0	0	0.480325	0.480325	0.5841	0.921644	exon	ENST00000606877,ENST00000593495	ENSG00000270629	NBPF14	---	---	---	---	---
1:148863250|148868622	0	0	0	1.44098	0	0	0	0.480325	0.480325	0.5841	0.921644	exon	ENST00000620605,ENST00000585156,ENST00000618462,ENST00000530472,ENST00000524974,ENST00000613995,ENST00000616206,ENST00000617527,ENST00000619981,ENST00000618504	ENSG00000178104	PDE4DIP	hsa_circ_0004694	1	148863250	148868622	+
1:1489204|1490671	0	3.1275	1.41363	0	0	0	1.51371	0	-1.51371	0.203141	0.921644	exon	ENST00000472194,ENST00000485748,ENST00000474481,ENST00000308647	ENSG00000160072	ATAD3B	hsa_circ_0009287	1	1489204	1490671	+
1:148931800|148937864	0	0	0	0	0	1.28966	0	0.429887	0.429887	0.635324	0.921644	exon	ENST00000617031,ENST00000585156,ENST00000618462,ENST00000524974,ENST00000369356,ENST00000369349,ENST00000369354,ENST00000369351	ENSG00000178104	PDE4DIP	hsa_circ_0013856	1	148931800	148937864	+
1:148965484|148974605	0	0	0	1.09988	0	0	0	0.366626	0.366626	0.661625	0.921644	exon	ENST00000585156,ENST00000618462,ENST00000524974,ENST00000369356,ENST00000369349,ENST00000369354,ENST00000529945,ENST00000369351,ENST00000479408,ENST00000467859,ENST00000313431	ENSG00000178104	PDE4DIP	---	---	---	---	---
1:148972180|148974605	0	0	0	1.09988	0	0	0	0.366626	0.366626	0.661625	0.921644	exon	ENST00000585156,ENST00000618462,ENST00000524974,ENST00000369356,ENST00000369349,ENST00000369354,ENST00000529945,ENST00000369351,ENST00000479408,ENST00000467859,ENST00000313431	ENSG00000178104	PDE4DIP	---	---	---	---	---
1:149009568|149010595	0	0	0	1.71665	0	0	0	0.572217	0.572217	0.523576	0.921644	exon	ENST00000585156,ENST00000479369,ENST00000618462,ENST00000369356,ENST00000369354	ENSG00000178104	PDE4DIP	---	---	---	---	---
1:149075655|149098706	0	0	0	0.652309	3.3625	0	0	1.33827	1.33827	0.260048	0.921644	exon	ENST00000621645,ENST00000615421	ENSG00000269713	NBPF9	---	---	---	---	---
1:149090205|149098706	0	0	0.873449	1.09988	2.03388	2.76104	0.29115	1.96493	1.67378	0.174645	0.921644	exon	ENST00000621645	ENSG00000269713	NBPF9	hsa_circ_0003960	1	149090205	149098706	-
1:149090753|149098706	0	0	0	1.94801	0	0	0	0.649335	0.649335	0.47295	0.921644	exon	ENST00000621645,ENST00000615421	ENSG00000269713	NBPF9	hsa_circ_0009085	1	149090753	149098706	-
1:149430934|149463826	0	0	1.41363	0	0	0	0.471212	0	-0.471212	0.566201	0.921644	exon	ENST00000621744,ENST00000578189	ENSG00000271383	NBPF19	---	---	---	---	---
1:149455318|149463826	0	0	0	0	2.84602	0	0	0.948672	0.948672	0.330659	0.921644	exon	ENST00000621744,ENST00000578189	ENSG00000271383	NBPF19	---	---	---	---	---
1:149480142|149482226	0	3.1275	0	0	0	0	1.0425	0	-1.0425	0.267733	0.921644	exon	ENST00000612881,ENST00000369227,ENST00000621744,ENST00000611931	ENSG00000271383	NBPF19	---	---	---	---	---
1:14960684|15044159	0	0	0.873449	0	0	0	0.29115	0	-0.29115	0.69286	0.921644	exon	ENST00000503743,ENST00000361144,ENST00000491547,ENST00000376028,ENST00000636203,ENST00000376030,ENST00000400798,ENST00000400797	ENSG00000189337	KAZN	---	---	---	---	---
1:149655699|149661089	3.4185	1.83985	1.41363	3.87974	4.2906	0	2.22399	2.72345	0.499452	0.465388	0.921644	exon	ENST00000610578	ENSG00000277147	LINC00869	---	---	---	---	---
1:149655699|149665133	2.08091	0	0	0	0	0	0.693638	0	-0.693638	0.429293	0.921644	exon	ENST00000610578	ENSG00000277147	LINC00869	---	---	---	---	---
11:36227085|36227430	8.4903	7.67807	8.42542	8.1841	7.88402	8.28361	8.19793	8.11724	-0.0806918	0.597346	0.921644	exon	ENST00000315571,ENST00000524419,ENST00000528989,ENST00000534091	ENSG00000179241	LDLRAD3	hsa_circ_0006988	11	36227085	36227430	+
1:149660854|149669310	2.89947	2.62281	1.41363	3.17049	0	1.95955	2.31197	1.71002	-0.601954	0.918215	0.97667	exon	ENST00000430442,ENST00000435115,ENST00000610578	ENSG00000277147	LINC00869	---	---	---	---	---
1:149664521|149669310	0	0	0	1.09988	0	0	0	0.366626	0.366626	0.661625	0.921644	exon	ENST00000610578	ENSG00000277147	LINC00869	---	---	---	---	---
1:149668300|149669310	0	1.83985	1.41363	1.44098	0	1.28966	1.0845	0.910213	-0.174283	0.89923	0.968118	exon	ENST00000430442,ENST00000435115	ENSG00000277147	LINC00869	---	---	---	---	---
1:149726883|149729613	0	0	0	0.652309	0	0	0	0.217436	0.217436	0.781429	0.921644	exon	ENST00000617878,ENST00000615436,ENST00000609662	ENSG00000234232	RP11-353N4.5	---	---	---	---	---
1:149929356|149929622	0	0	0	1.44098	0	0	0	0.480325	0.480325	0.5841	0.921644	exon	ENST00000482343,ENST00000492824	ENSG00000014914	MTMR11	---	---	---	---	---
1:149959684|149964349	1.38702	0	1.41363	1.44098	2.03388	0	0.933551	1.15829	0.224736	0.879645	0.960239	exon	ENST00000581312,ENST00000417191	ENSG00000264522	OTUD7B	---	---	---	---	---
1:149959684|149965878	0	1.83985	0	0	0	0	0.613285	0	-0.613285	0.494453	0.921644	exon	ENST00000581312,ENST00000417191	ENSG00000264522	OTUD7B	---	---	---	---	---
1:149959684|149977576	0	0	1.80575	1.44098	0	0	0.601917	0.480325	-0.121592	0.900247	0.968118	exon	ENST00000581312	ENSG00000264522	OTUD7B	---	---	---	---	---
1:149964222|149965878	0	1.83985	2.36742	1.09988	0	0	1.40243	0.366626	-1.0358	0.422331	0.921644	exon	ENST00000619871,ENST00000581312,ENST00000417191	ENSG00000264522	OTUD7B	hsa_circ_0003619	1	149964222	149965878	-
1:150072166|150077779	1.38702	0	0	0	0	0	0.46234	0	-0.46234	0.58606	0.921644	exon	ENST00000369128,ENST00000369130,ENST00000535106,ENST00000462852,ENST00000419023	ENSG00000136631	VPS45	---	---	---	---	---
1:150076233|150093648	0	1.83985	0	0	0	0	0.613285	0	-0.613285	0.494453	0.921644	exon	ENST00000369128,ENST00000369130,ENST00000535106	ENSG00000136631	VPS45	---	---	---	---	---
1:150076916|150093648	0	0	2.58309	0	0	0	0.861031	0	-0.861031	0.328374	0.921644	exon	ENST00000369130	ENSG00000136631	VPS45	---	---	---	---	---
1:150077094|150110627	0	0	0	0.652309	0	0	0	0.217436	0.217436	0.781429	0.921644	exon	ENST00000611412,ENST00000369130	ENSG00000136631	VPS45	---	---	---	---	---
1:150077669|150110627	0	0	0	1.44098	0	0	0	0.480325	0.480325	0.5841	0.921644	exon	ENST00000611412,ENST00000369128,ENST00000369130,ENST00000535106	ENSG00000136631	VPS45	---	---	---	---	---
1:150091937|150110627	2.54748	0	2.36742	3.56827	2.84602	3.03976	1.6383	3.15135	1.51305	0.209431	0.921644	exon	ENST00000611412,ENST00000369128,ENST00000369130,ENST00000535106	ENSG00000136631	VPS45	---	---	---	---	---
1:150229072|150231926	0	0	0	1.71665	0	0	0	0.572217	0.572217	0.523576	0.921644	exon	ENST00000583931,ENST00000616917,ENST00000436748	ENSG00000143401	ANP32E	---	---	---	---	---
1:150230571|150231926	0	0	0	0	0	1.28966	0	0.429887	0.429887	0.635324	0.921644	exon	ENST00000583931,ENST00000616917,ENST00000533654,ENST00000369114	ENSG00000143401	ANP32E	hsa_circ_0004300	1	150230571	150231926	-
1:150324895|150325881	0	0	0	0.652309	0	2.41525	0	1.02252	1.02252	0.32149	0.921644	exon	ENST00000324862,ENST00000496202	ENSG00000117360	PRPF3	---	---	---	---	---
1:150328320|150333199	0	0	1.80575	0	0	1.28966	0.601917	0.429887	-0.17203	0.840783	0.941209	exon	ENST00000467329,ENST00000324862,ENST00000496202	ENSG00000117360	PRPF3	---	---	---	---	---
1:150332684|150333199	0	0	1.41363	0	0	0	0.471212	0	-0.471212	0.566201	0.921644	exon	ENST00000467329,ENST00000467514,ENST00000324862,ENST00000496202	ENSG00000117360	PRPF3	---	---	---	---	---
1:150334935|150335241	0	1.83985	2.58309	2.14734	0	3.94926	1.47432	2.0322	0.557884	0.519753	0.921644	exon	ENST00000467329,ENST00000324862	ENSG00000117360	PRPF3	---	---	---	---	---
1:150334935|150338326	0	0	2.36742	1.09988	0	2.41525	0.789141	1.17171	0.382568	0.901773	0.968344	exon	ENST00000467329,ENST00000324862	ENSG00000117360	PRPF3	hsa_circ_0014008	1	150334935	150338326	+
1:150334935|150340477	0	0	0	0	0	2.41525	0	0.805084	0.805084	0.395572	0.921644	exon	ENST00000467329,ENST00000324862	ENSG00000117360	PRPF3	---	---	---	---	---
1:150340398|150344261	0	0	0	0	0	1.95955	0	0.653185	0.653185	0.485036	0.921644	exon	ENST00000467329,ENST00000324862	ENSG00000117360	PRPF3	---	---	---	---	---
1:150344162|150346491	0	0	0	0.652309	0	0	0	0.217436	0.217436	0.781429	0.921644	exon	ENST00000467329,ENST00000324862	ENSG00000117360	PRPF3	---	---	---	---	---
1:15034749|15044159	0	0	2.11375	1.09988	0	0	0.704583	0.366626	-0.337958	0.722448	0.921644	exon	ENST00000503743,ENST00000361144,ENST00000491547,ENST00000376028,ENST00000636203,ENST00000376030,ENST00000400798,ENST00000400797	ENSG00000189337	KAZN	hsa_circ_0010030	1	15034749	15044159	+
1:150408906|150446401	0	0	0	1.44098	0	0	0	0.480325	0.480325	0.5841	0.921644	exon	ENST00000492220	ENSG00000163125	RPRD2	---	---	---	---	---
8:98706467|98707311	8.12332	8.61883	7.83381	7.25262	8.07826	7.49301	8.19199	7.60796	-0.584024	0.039862	0.921644	exon	ENST00000419617,ENST00000424861,ENST00000523601	ENSG00000104375	STK3	hsa_circ_0004592	8	98706467	98707311	-
1:150440923|150444377	0	0	2.11375	1.94801	3.3625	0	0.704583	1.77017	1.06558	0.527526	0.921644	exon	ENST00000401000,ENST00000492220,ENST00000369068	ENSG00000163125	RPRD2	hsa_circ_0004437	1	150440923	150444377	+
1:150440923|150446401	2.54748	3.1275	0	1.71665	3.3625	2.41525	1.89166	2.49813	0.606471	0.819038	0.938234	exon	ENST00000401000,ENST00000492220,ENST00000369068	ENSG00000163125	RPRD2	---	---	---	---	---
1:150440923|150460317	0	0	0	0	2.03388	0	0	0.677962	0.677962	0.50093	0.921644	exon	ENST00000401000,ENST00000492220,ENST00000369068	ENSG00000163125	RPRD2	---	---	---	---	---
1:150444251|150457570	0	1.83985	0	2.14734	0	0	0.613285	0.715779	0.102494	0.859144	0.949777	exon	ENST00000401000,ENST00000492220,ENST00000369068	ENSG00000163125	RPRD2	---	---	---	---	---
1:150444251|150460317	0	0	0	2.14734	0	0	0	0.715779	0.715779	0.433375	0.921644	exon	ENST00000401000,ENST00000492220,ENST00000369068	ENSG00000163125	RPRD2	hsa_circ_0014013	1	150444251	150460317	+
1:150446226|150457570	0	1.83985	1.80575	0	0	0	1.2152	0	-1.2152	0.281573	0.921644	exon	ENST00000401000,ENST00000492220,ENST00000369068	ENSG00000163125	RPRD2	---	---	---	---	---
1:150446226|150464727	0	0	0	0.652309	0	0	0	0.217436	0.217436	0.781429	0.921644	exon	ENST00000401000,ENST00000492220,ENST00000369068	ENSG00000163125	RPRD2	---	---	---	---	---
1:150460060|150460317	0	0	0	0.652309	0	0	0	0.217436	0.217436	0.781429	0.921644	exon	ENST00000401000,ENST00000492220,ENST00000369068	ENSG00000163125	RPRD2	hsa_circ_0014016	1	150460060	150460317	+
1:150460060|150464727	0	3.1275	0	0	0	0	1.0425	0	-1.0425	0.267733	0.921644	exon	ENST00000401000,ENST00000492220,ENST00000369068	ENSG00000163125	RPRD2	---	---	---	---	---
1:150470981|150471519	0	0	0	0.652309	0	0	0	0.217436	0.217436	0.781429	0.921644	exon	ENST00000401000,ENST00000492220,ENST00000369068	ENSG00000163125	RPRD2	---	---	---	---	---
1:150490601|150492489	2.08091	0	0	2.32244	0	1.95955	0.693638	1.42733	0.733693	0.63894	0.921644	exon	ENST00000606933,ENST00000369064	ENSG00000143374	TARS2	hsa_circ_0014019	1	150490601	150492489	+
1:150491394|150499293	0	0	2.58309	0	0	0	0.861031	0	-0.861031	0.328374	0.921644	exon	ENST00000606933,ENST00000369054,ENST00000467982,ENST00000369064	ENSG00000143374	TARS2	---	---	---	---	---
7:155672867|155680908	8.11494	8.45879	7.92554	8.11438	7.95771	7.62557	8.16642	7.89922	-0.267206	0.192662	0.921644	exon	ENST00000392759,ENST00000401878,ENST00000287912	ENSG00000184863	RBM33	hsa_circ_0001772	7	155672867	155680908	+
1:150492411|150497747	0	0	0	0	0	1.28966	0	0.429887	0.429887	0.635324	0.921644	exon	ENST00000606933,ENST00000480070,ENST00000369064,ENST00000438568,ENST00000463555,ENST00000369051	ENSG00000143374	TARS2	hsa_circ_0014022	1	150492411	150497747	+
1:150497530|150499293	2.08091	0	2.36742	1.94801	0	0	1.48278	0.649335	-0.833444	0.599545	0.921644	exon	ENST00000606933,ENST00000480070,ENST00000369054,ENST00000369064,ENST00000438568,ENST00000463555,ENST00000369051	ENSG00000143374	TARS2	hsa_circ_0014026	1	150497530	150499293	+
1:150498502|150499293	0	2.62281	0	0	0	0	0.874269	0	-0.874269	0.339128	0.921644	exon	ENST00000606933,ENST00000480070,ENST00000369054,ENST00000467982,ENST00000369064,ENST00000438568,ENST00000463555,ENST00000369051	ENSG00000143374	TARS2	hsa_circ_0014027	1	150498502	150499293	+
1:15056091|15060302	0	0	0	0.652309	0	0	0	0.217436	0.217436	0.781429	0.921644	exon	ENST00000503743,ENST00000361144,ENST00000491547,ENST00000636203,ENST00000376030,ENST00000400798,ENST00000400797	ENSG00000189337	KAZN	hsa_circ_0010032	1	15056091	15060302	+
1:150578521|150578842	0	0	0	1.09988	0	0	0	0.366626	0.366626	0.661625	0.921644	exon_intron	ENST00000464132	ENSG00000143384	MCL1	hsa_circ_0002364	1	150578521	150578842	-
1:150625642|150627592	2.89947	0	0	2.14734	0	0	0.966489	0.715779	-0.25071	0.825052	0.938735	exon	ENST00000503345,ENST00000271690,ENST00000509582,ENST00000361532,ENST00000356527,ENST00000361631,ENST00000513281,ENST00000369016,ENST00000339643,ENST00000503241,ENST00000354702,ENST00000369014	ENSG00000143420	ENSA	---	---	---	---	---
1:150661814|150663763	0	0	1.41363	1.44098	0	0	0.471212	0.480325	0.0091139	0.984003	0.99243	exon	ENST00000427665,ENST00000271732	ENSG00000143457	GOLPH3L	---	---	---	---	---
1:150661814|150694850	0	0	0	0	2.84602	0	0	0.948672	0.948672	0.330659	0.921644	exon	ENST00000427665,ENST00000271732	ENSG00000143457	GOLPH3L	---	---	---	---	---
1:150747777|150757980	0	0	0	2.14734	3.74203	0	0	1.96312	1.96312	0.173767	0.921644	exon	ENST00000448301,ENST00000368985	ENSG00000163131	CTSS	---	---	---	---	---
1:150814077|150818030	0	0	0	1.94801	0	0	0	0.649335	0.649335	0.47295	0.921644	exon	ENST00000354396,ENST00000471844,ENST00000358595,ENST00000505755,ENST00000515192	ENSG00000143437	ARNT	---	---	---	---	---
1:150816259|150818030	0	0	0	2.32244	0	2.41525	0	1.57923	1.57923	0.136301	0.921644	exon	ENST00000354396,ENST00000358595,ENST00000505755,ENST00000515192	ENSG00000143437	ARNT	---	---	---	---	---
1:150816259|150823345	0	0	0	0	2.03388	0	0	0.677962	0.677962	0.50093	0.921644	exon	ENST00000354396,ENST00000358595,ENST00000505755,ENST00000515192	ENSG00000143437	ARNT	---	---	---	---	---
1:150816259|150829980	0	1.83985	0	0	0	0	0.613285	0	-0.613285	0.494453	0.921644	exon	ENST00000354396,ENST00000358595,ENST00000505755	ENSG00000143437	ARNT	---	---	---	---	---
22:45700282|45740538	8.31113	8.03096	8.14497	7.78854	7.36666	7.51596	8.16235	7.55705	-0.605301	0.00525378	0.921644	exon	ENST00000252934,ENST00000381061	ENSG00000130638	ATXN10	hsa_circ_0001246	22	45700282	45740538	+
1:150823194|150834640	1.38702	0	1.41363	0	0	1.28966	0.933551	0.429887	-0.503664	0.734491	0.921644	exon	ENST00000354396,ENST00000358595,ENST00000505755,ENST00000515192	ENSG00000143437	ARNT	---	---	---	---	---
1:150826543|150829980	2.89947	0	0	0	2.03388	0	0.966489	0.677962	-0.288527	0.741019	0.921644	exon	ENST00000354396,ENST00000471844,ENST00000358595,ENST00000505755	ENSG00000143437	ARNT	---	---	---	---	---
1:150826543|150832399	0	0	0	1.44098	0	3.03976	0	1.49358	1.49358	0.121328	0.921644	exon	ENST00000354396,ENST00000471844,ENST00000358595,ENST00000505755,ENST00000515192	ENSG00000143437	ARNT	---	---	---	---	---
1:150826543|150834640	0	2.62281	0	0	0	0	0.874269	0	-0.874269	0.339128	0.921644	exon	ENST00000354396,ENST00000471844,ENST00000358595,ENST00000505755,ENST00000515192	ENSG00000143437	ARNT	---	---	---	---	---
1:150826543|150836493	0	0	1.80575	0	0	0	0.601917	0	-0.601917	0.475406	0.921644	exon	ENST00000354396,ENST00000471844,ENST00000358595,ENST00000505755,ENST00000515192	ENSG00000143437	ARNT	---	---	---	---	---
1:150829093|150834640	1.38702	0	0	0	0	0	0.46234	0	-0.46234	0.58606	0.921644	exon	ENST00000354396,ENST00000471844,ENST00000358595,ENST00000505755,ENST00000515192	ENSG00000143437	ARNT	---	---	---	---	---
1:150831818|150836493	0	0	0	0.652309	0	0	0	0.217436	0.217436	0.781429	0.921644	exon	ENST00000354396,ENST00000471844,ENST00000358595,ENST00000505755,ENST00000515192,ENST00000468970	ENSG00000143437	ARNT	---	---	---	---	---
1:150832334|150839654	0	3.1275	0	1.71665	0	0	1.0425	0.572217	-0.470284	0.672116	0.921644	exon	ENST00000354396,ENST00000471844,ENST00000358595,ENST00000505755,ENST00000515192	ENSG00000143437	ARNT	---	---	---	---	---
1:150836280|150839654	0	1.83985	0	0	0	0	0.613285	0	-0.613285	0.494453	0.921644	exon	ENST00000354396,ENST00000471844,ENST00000358595,ENST00000505755,ENST00000515192	ENSG00000143437	ARNT	---	---	---	---	---
1:150846263|150858460	0	0	1.80575	0	0	0	0.601917	0	-0.601917	0.475406	0.921644	exon	ENST00000354396,ENST00000505979,ENST00000471844,ENST00000504358,ENST00000358595,ENST00000497108,ENST00000505755,ENST00000515192	ENSG00000143437	ARNT	---	---	---	---	---
1:150927704|150930118	1.38702	0	0	0.652309	0	0	0.46234	0.217436	-0.244903	0.824865	0.938733	exon	ENST00000368964,ENST00000368969,ENST00000368963,ENST00000368962,ENST00000487584,ENST00000459773,ENST00000448029,ENST00000534805,ENST00000525956,ENST00000271640,ENST00000498193	ENSG00000143379	SETDB1	hsa_circ_0014050	1	150927704	150930118	+
1:150927704|150939974	0	0	0	1.71665	0	0	0	0.572217	0.572217	0.523576	0.921644	exon	ENST00000368964,ENST00000368969,ENST00000368963,ENST00000368962,ENST00000448029,ENST00000534805,ENST00000525956,ENST00000271640,ENST00000498193	ENSG00000143379	SETDB1	hsa_circ_0014051	1	150927704	150939974	+
1:150927704|150941428	0	0	1.41363	0	0	3.27325	0.471212	1.09109	0.619873	0.562953	0.921644	exon	ENST00000368969,ENST00000368963,ENST00000368962,ENST00000534805,ENST00000271640,ENST00000498193	ENSG00000143379	SETDB1	hsa_circ_0003439	1	150927704	150941428	+
1:150929967|150941428	0	0	2.58309	1.09988	0	1.28966	0.861031	0.796513	-0.0645175	0.730119	0.921644	exon	ENST00000368969,ENST00000368963,ENST00000368962,ENST00000534805,ENST00000271640,ENST00000498193	ENSG00000143379	SETDB1	hsa_circ_0006851	1	150929967	150941428	+
1:150941329|150945108	0	0	0	0	0	1.28966	0	0.429887	0.429887	0.635324	0.921644	exon	ENST00000368969,ENST00000368963,ENST00000368962,ENST00000534805,ENST00000271640,ENST00000498193	ENSG00000143379	SETDB1	---	---	---	---	---
1:15094180|15094933	0	0	1.41363	0	0	0	0.471212	0	-0.471212	0.566201	0.921644	exon	ENST00000636203,ENST00000376030	ENSG00000189337	KAZN	---	---	---	---	---
1:150943920|150947012	0	0	1.80575	0	0	0	0.601917	0	-0.601917	0.475406	0.921644	exon	ENST00000368969,ENST00000534805,ENST00000271640,ENST00000498193	ENSG00000143379	SETDB1	---	---	---	---	---
1:150943920|150951481	0	0	0	1.44098	0	0	0	0.480325	0.480325	0.5841	0.921644	exon	ENST00000368969,ENST00000271640,ENST00000498193	ENSG00000143379	SETDB1	---	---	---	---	---
1:150946886|150949525	2.08091	0	0	1.09988	2.84602	0	0.693638	1.3153	0.621659	0.682097	0.921644	exon	ENST00000368969,ENST00000534805,ENST00000271640,ENST00000498193	ENSG00000143379	SETDB1	hsa_circ_0003049	1	150946886	150949525	+
1:150946886|150951481	0	0	0	0	2.84602	0	0	0.948672	0.948672	0.330659	0.921644	exon	ENST00000368969,ENST00000271640,ENST00000498193	ENSG00000143379	SETDB1	hsa_circ_0014061	1	150946886	150951481	+
1:150946886|150959347	0	1.83985	2.11375	0	0	1.28966	1.31787	0.429887	-0.887981	0.499142	0.921644	exon	ENST00000368969,ENST00000271640,ENST00000498193	ENSG00000143379	SETDB1	---	---	---	---	---
1:150949122|150949525	2.54748	0	2.77067	0.652309	4.50242	0	1.77272	1.71824	-0.0544749	0.70577	0.921644	exon	ENST00000368969,ENST00000534805,ENST00000271640,ENST00000498193	ENSG00000143379	SETDB1	hsa_circ_0014063	1	150949122	150949525	+
1:150951365|150962719	2.54748	0	0.873449	0.652309	0	1.95955	1.14031	0.870621	-0.269689	0.765505	0.921644	exon	ENST00000368969,ENST00000271640,ENST00000498193	ENSG00000143379	SETDB1	hsa_circ_0006352	1	150951365	150962719	+
1:150960563|150962158	2.08091	0	0	1.09988	0	0	0.693638	0.366626	-0.327013	0.749014	0.921644	exon	ENST00000368969,ENST00000271640,ENST00000498193	ENSG00000143379	SETDB1	hsa_circ_0005995	1	150960563	150962158	+
1:150962587|150963741	0	0	0	1.44098	0	0	0	0.480325	0.480325	0.5841	0.921644	exon	ENST00000368969,ENST00000497314,ENST00000271640,ENST00000498193	ENSG00000143379	SETDB1	---	---	---	---	---
1:150962958|150964563	0	0	0	0.652309	0	0	0	0.217436	0.217436	0.781429	0.921644	exon	ENST00000482825	ENSG00000143418	CERS2	---	---	---	---	---
1:150962974|150963741	0	0	0	0.652309	0	0	0	0.217436	0.217436	0.781429	0.921644	exon	ENST00000368969,ENST00000497314,ENST00000533529,ENST00000271640,ENST00000498193	ENSG00000143379	SETDB1	---	---	---	---	---
1:151017812|151025673	0	0	1.41363	0	0	0	0.471212	0	-0.471212	0.566201	0.921644	exon	ENST00000431193,ENST00000467771,ENST00000271620,ENST00000368936	ENSG00000143363	PRUNE1	---	---	---	---	---
1:151017812|151028944	0	0	0	1.09988	0	0	0	0.366626	0.366626	0.661625	0.921644	exon	ENST00000467771,ENST00000462440,ENST00000271620,ENST00000475722,ENST00000368936	ENSG00000143363	PRUNE1	hsa_circ_0014085	1	151017812	151028944	+
8:127890589|127890998	7.95508	7.92775	8.51346	8.19258	8.06164	8.14322	8.1321	8.13248	0.000381648	0.755238	0.921644	exon	ENST00000521951	ENSG00000249859	PVT1	hsa_circ_0001821	8	127890589	127890998	+
20:35714185|35725155	8.30377	8.17956	7.88549	7.91353	7.92133	7.64652	8.12294	7.82713	-0.295817	0.114339	0.921644	exon	ENST00000448303,ENST00000429968,ENST00000253363,ENST00000528062,ENST00000361162,ENST00000461283,ENST00000463004,ENST00000492779,ENST00000338163,ENST00000444878,ENST00000403542	ENSG00000131051	RBM39	hsa_circ_0004870	20	35714185	35725155	-
6:136694140|136698682	8.41036	7.81658	8.05756	8.12918	7.97556	8.45969	8.09483	8.18815	0.093312	0.827869	0.940507	exon	ENST00000359015	ENSG00000197442	MAP3K5	hsa_circ_0006856	6	136694140	136698682	-
1:151027233|151028944	0	0	0	0	0	1.28966	0	0.429887	0.429887	0.635324	0.921644	exon	ENST00000467771,ENST00000462440,ENST00000450884,ENST00000271620,ENST00000475722,ENST00000368936	ENSG00000143363	PRUNE1	hsa_circ_0014088	1	151027233	151028944	+
1:151088190|151093386	0	1.83985	0	0.652309	0	0	0.613285	0.217436	-0.395848	0.717705	0.921644	exon	ENST00000368916,ENST00000368918,ENST00000489549,ENST00000486076,ENST00000462520	ENSG00000143458	GABPB2	---	---	---	---	---
1:151088190|151098002	0	0	2.36742	0	2.03388	0	0.789141	0.677962	-0.11118	0.857977	0.949777	exon	ENST00000368916,ENST00000368918,ENST00000489549,ENST00000486076	ENSG00000143458	GABPB2	hsa_circ_0000127	1	151088190	151098002	+
1:151088190|151103675	0	1.83985	0	2.47857	0	0	0.613285	0.826191	0.212906	0.80229	0.931732	exon	ENST00000368918,ENST00000489549	ENSG00000143458	GABPB2	---	---	---	---	---
16:68121987|68126610	8.08091	8.2907	7.90064	7.9101	7.28312	7.81333	8.09075	7.66885	-0.421903	0.0823017	0.921644	exon	ENST00000570212,ENST00000553077,ENST00000575270,ENST00000535127,ENST00000563319,ENST00000563796,ENST00000563288,ENST00000379165,ENST00000567152,ENST00000562926,ENST00000349223,ENST00000569766,ENST00000329524,ENST00000549350,ENST00000346183,ENST00000566301	ENSG00000072736	NFATC3	hsa_circ_0000711	16	68121987	68126610	+
1:151090406|151098002	0	1.83985	0	0	0	1.95955	0.613285	0.653185	0.0398999	0.943118	0.98174	exon	ENST00000368916,ENST00000368918,ENST00000486076	ENSG00000143458	GABPB2	hsa_circ_0014098	1	151090406	151098002	+
1:151090406|151107222	0	1.83985	0	1.09988	3.3625	0	0.613285	1.48746	0.874173	0.477146	0.921644	exon	ENST00000368916,ENST00000368918	ENSG00000143458	GABPB2	---	---	---	---	---
1:151093192|151098002	0	0	0	1.71665	0	0	0	0.572217	0.572217	0.523576	0.921644	exon	ENST00000368916,ENST00000368918,ENST00000489549,ENST00000486076	ENSG00000143458	GABPB2	---	---	---	---	---
1:151093192|151103675	0	1.83985	0	1.94801	0	0	0.613285	0.649335	0.0360506	0.922066	0.977053	exon	ENST00000368918,ENST00000489549	ENSG00000143458	GABPB2	---	---	---	---	---
1:151093192|151107222	0	0	0	2.32244	0	0	0	0.774146	0.774146	0.40131	0.921644	exon	ENST00000368916,ENST00000368918	ENSG00000143458	GABPB2	---	---	---	---	---
1:151097852|151107222	0	0	0	0.652309	0	0	0	0.217436	0.217436	0.781429	0.921644	exon	ENST00000368916,ENST00000368918,ENST00000467551	ENSG00000143458	GABPB2	hsa_circ_0014099	1	151097852	151107222	+
1:151103562|151107222	1.38702	0	0	0	0	0	0.46234	0	-0.46234	0.58606	0.921644	exon	ENST00000368918	ENSG00000143458	GABPB2	---	---	---	---	---
1:151137711|151139481	0	1.83985	0	0	0	0	0.613285	0	-0.613285	0.494453	0.921644	exon	ENST00000368912,ENST00000368914,ENST00000613223,ENST00000621728,ENST00000368913,ENST00000341697	ENSG00000143434	SEMA6C	---	---	---	---	---
1:151138316|151144434	0	0	0	0	0	2.41525	0	0.805084	0.805084	0.395572	0.921644	exon	ENST00000368912,ENST00000368914,ENST00000613223,ENST00000368913,ENST00000341697	ENSG00000143434	SEMA6C	---	---	---	---	---
1:151139425|151144434	1.38702	0	0	0	0	0	0.46234	0	-0.46234	0.58606	0.921644	exon	ENST00000368912,ENST00000368914,ENST00000613223,ENST00000368913,ENST00000341697	ENSG00000143434	SEMA6C	---	---	---	---	---
1:151161736|151162100	2.54748	0	0.873449	1.71665	0	0	1.14031	0.572217	-0.568093	0.671536	0.921644	exon	ENST00000440902,ENST00000368908	ENSG00000163155	LYSMD1	hsa_circ_0014105	1	151161736	151162100	-
1:151166934|151167414	0	2.62281	0.873449	1.94801	0	1.28966	1.16542	1.07922	-0.0861961	0.890935	0.965066	exon	ENST00000497147,ENST00000461862,ENST00000602841,ENST00000368905,ENST00000368902	ENSG00000163156	SCNM1	hsa_circ_0000128	1	151166934	151167414	+
1:151178001|151184493	1.38702	0	2.93665	2.47857	0	1.95955	1.44122	1.47938	0.0381532	0.929647	0.977189	exon	ENST00000368892,ENST00000491094,ENST00000496809,ENST00000354473	ENSG00000163159	VPS72	---	---	---	---	---
1:151178001|151185950	1.38702	0	0	0	0	0	0.46234	0	-0.46234	0.58606	0.921644	exon	ENST00000368892,ENST00000491094,ENST00000496809,ENST00000354473	ENSG00000163159	VPS72	---	---	---	---	---
1:151184317|151185950	1.38702	0	0	1.71665	0	0	0.46234	0.572217	0.109878	0.884168	0.960332	exon	ENST00000368892,ENST00000491094,ENST00000496809,ENST00000354473	ENSG00000163159	VPS72	---	---	---	---	---
1:151185506|151185950	2.08091	0	0	0	2.84602	0	0.693638	0.948672	0.255034	0.839755	0.941209	exon	ENST00000368892,ENST00000491094,ENST00000496809,ENST00000354473	ENSG00000163159	VPS72	---	---	---	---	---
16:47497399|47515601	8.27397	8.07303	7.91563	7.62687	7.63723	7.67739	8.08754	7.64716	-0.44038	0.0205147	0.921644	exon	ENST00000566044,ENST00000566037,ENST00000567402,ENST00000323584,ENST00000299167	ENSG00000102893	PHKB	hsa_circ_0000698	16	47497399	47515601	+
1:151224245|151236763	1.38702	0	1.41363	2.14734	0	3.03976	0.933551	1.72903	0.795481	0.382241	0.921644	exon	ENST00000368888,ENST00000441902,ENST00000409426	ENSG00000143398	PIP5K1A	---	---	---	---	---
1:151224245|151239178	3.4185	0	0	0	0	0	1.1395	0	-1.1395	0.229203	0.921644	exon	ENST00000368888,ENST00000441902,ENST00000409426	ENSG00000143398	PIP5K1A	hsa_circ_0014120	1	151224245	151239178	+
1:151224245|151240039	0	0	1.41363	0	0	0	0.471212	0	-0.471212	0.566201	0.921644	exon	ENST00000368888,ENST00000441902,ENST00000409426	ENSG00000143398	PIP5K1A	---	---	---	---	---
1:151224248|151232703	2.08091	0	0.873449	2.74778	2.03388	0	0.984788	1.59389	0.6091	0.589116	0.921644	exon	ENST00000368890,ENST00000349792,ENST00000368888,ENST00000441902,ENST00000409426	ENSG00000143398	PIP5K1A	hsa_circ_0007228	1	151224248	151232703	+
1:151224248|151234496	2.08091	0	0	1.09988	0	0	0.693638	0.366626	-0.327013	0.749014	0.921644	exon	ENST00000368890,ENST00000349792,ENST00000368888,ENST00000441902,ENST00000409426	ENSG00000143398	PIP5K1A	hsa_circ_0014123	1	151224248	151234496	+
1:151224248|151236763	2.08091	0	0	2.74778	0	3.47417	0.693638	2.07398	1.38034	0.36979	0.921644	exon	ENST00000368890,ENST00000349792,ENST00000368888,ENST00000441902,ENST00000409426	ENSG00000143398	PIP5K1A	hsa_circ_0014124	1	151224248	151236763	+
1:151224248|151239178	0	0	0	1.09988	0	0	0	0.366626	0.366626	0.661625	0.921644	exon	ENST00000368890,ENST00000349792,ENST00000368888,ENST00000441902,ENST00000409426	ENSG00000143398	PIP5K1A	---	---	---	---	---
1:151224248|151242567	0	0	0	0	2.84602	2.41525	0	1.75376	1.75376	0.239167	0.921644	exon	ENST00000368890,ENST00000349792,ENST00000368888,ENST00000441902,ENST00000409426	ENSG00000143398	PIP5K1A	hsa_circ_0014125	1	151224248	151242567	+
1:151227320|151232703	0	1.83985	0	2.61944	0	2.76104	0.613285	1.79349	1.18021	0.271381	0.921644	exon	ENST00000368890,ENST00000349792,ENST00000368888,ENST00000441902,ENST00000409426	ENSG00000143398	PIP5K1A	hsa_circ_0008018	1	151227320	151232703	+
1:151227320|151234496	0	0	0	0.652309	0	0	0	0.217436	0.217436	0.781429	0.921644	exon	ENST00000368890,ENST00000349792,ENST00000368888,ENST00000441902,ENST00000409426	ENSG00000143398	PIP5K1A	---	---	---	---	---
1:151227320|151236763	0	0	1.80575	0	0	0	0.601917	0	-0.601917	0.475406	0.921644	exon	ENST00000368890,ENST00000349792,ENST00000368888,ENST00000441902,ENST00000409426	ENSG00000143398	PIP5K1A	hsa_circ_0014127	1	151227320	151236763	+
4:3086939|3107423	8.18067	7.91238	8.03485	8.01266	7.59166	8.17962	8.04263	7.92798	-0.114653	0.586024	0.921644	exon	ENST00000355072	ENSG00000197386	HTT	hsa_circ_0001392	4	3086939	3107423	+
1:151234197|151240039	0	0	0	0	0	1.95955	0	0.653185	0.653185	0.485036	0.921644	exon	ENST00000368890,ENST00000349792,ENST00000368888,ENST00000441902,ENST00000409426	ENSG00000143398	PIP5K1A	hsa_circ_0014130	1	151234197	151240039	+
1:151239955|151242567	1.38702	2.62281	0	1.71665	0	1.28966	1.33661	1.0021	-0.334504	0.756838	0.921644	exon	ENST00000368890,ENST00000349792,ENST00000368888,ENST00000441902,ENST00000409426	ENSG00000143398	PIP5K1A	hsa_circ_0008623	1	151239955	151242567	+
1:151262161|151264028	0	1.83985	1.41363	0.652309	0	0	1.0845	0.217436	-0.86706	0.505168	0.921644	exon	ENST00000437736,ENST00000368884,ENST00000368881,ENST00000476855,ENST00000462970	ENSG00000159352	PSMD4	hsa_circ_0004482	1	151262161	151264028	+
1:151288528|151289271	0	0	1.41363	1.71665	0	0	0.471212	0.572217	0.101006	0.908401	0.971481	exon	ENST00000336715,ENST00000324048,ENST00000459919,ENST00000426871	ENSG00000143373	ZNF687	hsa_circ_0014144	1	151288528	151289271	+
1:151301844|151306363	0	0	0	1.09988	0	0	0	0.366626	0.366626	0.661625	0.921644	exon	ENST00000529142,ENST00000368874,ENST00000368873,ENST00000368875,ENST00000368872	ENSG00000143393	PI4KB	---	---	---	---	---
1:151303541|151306363	2.08091	0	2.36742	2.86562	0	2.41525	1.48278	1.76029	0.277512	0.747263	0.921644	exon	ENST00000529142,ENST00000368874,ENST00000430800,ENST00000368873,ENST00000368875,ENST00000368872,ENST00000460323	ENSG00000143393	PI4KB	hsa_circ_0014151	1	151303541	151306363	-
1:151307574|151316509	0	0	0	1.44098	0	0	0	0.480325	0.480325	0.5841	0.921644	exon	ENST00000368874,ENST00000368873,ENST00000368875,ENST00000368872	ENSG00000143393	PI4KB	---	---	---	---	---
13:60439688|60467379	8.16451	7.64126	8.31291	8.09339	8.02782	8.64292	8.03956	8.25471	0.215151	0.559348	0.921644	exon	ENST00000377894,ENST00000196169,ENST00000484389,ENST00000377881,ENST00000377882,ENST00000621840,ENST00000535286	ENSG00000083544	TDRD3	hsa_circ_0003441	13	60439688	60467379	+
1:151315573|151324917	0	1.83985	0	1.44098	0	0	0.613285	0.480325	-0.132959	0.929157	0.977053	exon	ENST00000368872	ENSG00000143393	PI4KB	---	---	---	---	---
1:151345928|151346606	0	0	1.80575	0	0	0	0.601917	0	-0.601917	0.475406	0.921644	exon	ENST00000412774,ENST00000430227,ENST00000437327,ENST00000458484,ENST00000450506,ENST00000444392,ENST00000368870,ENST00000452671,ENST00000479681,ENST00000392746,ENST00000435314,ENST00000478564,ENST00000422595,ENST00000290524,ENST00000494217,ENST00000421986,ENST00000436271,ENST00000452456	ENSG00000143390	RFX5	---	---	---	---	---
1:151368199|151369769	0	1.83985	0	1.09988	0	0	0.613285	0.366626	-0.246659	0.840168	0.941209	exon	ENST00000443708,ENST00000458566,ENST00000474352,ENST00000463664,ENST00000423070,ENST00000427977,ENST00000455839,ENST00000492643,ENST00000426705,ENST00000424475,ENST00000455397,ENST00000498494,ENST00000493560,ENST00000447402,ENST00000470345,ENST00000368868,ENST00000473693	ENSG00000143416	SELENBP1	hsa_circ_0014156	1	151368199	151369769	-
1:151406911|151408240	0	0	0	0	0	2.41525	0	0.805084	0.805084	0.395572	0.921644	exon	ENST00000409503,ENST00000529669,ENST00000392723,ENST00000491586,ENST00000368863,ENST00000271715,ENST00000531094,ENST00000358476	ENSG00000143442	POGZ	---	---	---	---	---
1:151408100|151408828	2.89947	1.83985	2.58309	2.61944	2.84602	0	2.4408	1.82182	-0.618984	0.751505	0.921644	exon	ENST00000409503,ENST00000529669,ENST00000392723,ENST00000491586,ENST00000368863,ENST00000271715,ENST00000531094,ENST00000358476	ENSG00000143442	POGZ	---	---	---	---	---
1:151408100|151412396	2.08091	0	0	1.09988	0	0	0.693638	0.366626	-0.327013	0.749014	0.921644	exon	ENST00000409503,ENST00000529669,ENST00000392723,ENST00000491586,ENST00000368863,ENST00000271715,ENST00000531094,ENST00000358476	ENSG00000143442	POGZ	---	---	---	---	---
1:151411625|151430841	0	1.83985	0	0	0	0	0.613285	0	-0.613285	0.494453	0.921644	exon	ENST00000409503,ENST00000392723,ENST00000491586,ENST00000271715,ENST00000531094,ENST00000358476	ENSG00000143442	POGZ	hsa_circ_0014172	1	151411625	151430841	-
1:151423397|151425061	0	1.83985	0	0	0	1.28966	0.613285	0.429887	-0.183397	0.868635	0.953201	exon	ENST00000409503,ENST00000392723,ENST00000491586,ENST00000368863,ENST00000271715,ENST00000531094,ENST00000358476	ENSG00000143442	POGZ	hsa_circ_0014173	1	151423397	151425061	-
1:151423397|151430841	0	0	0	0	0	1.95955	0	0.653185	0.653185	0.485036	0.921644	exon	ENST00000409503,ENST00000392723,ENST00000491586,ENST00000271715,ENST00000531094,ENST00000358476	ENSG00000143442	POGZ	hsa_circ_0008701	1	151423397	151430841	-
1:151423397|151442205	3.1822	1.83985	0	1.44098	4.04223	0	1.67402	1.82774	0.153719	0.807114	0.93419	exon	ENST00000409503,ENST00000491586,ENST00000368863,ENST00000271715,ENST00000531094,ENST00000358476	ENSG00000143442	POGZ	hsa_circ_0014174	1	151423397	151442205	-
1:151424303|151424954	0	0	0.873449	0	0	1.28966	0.29115	0.429887	0.138738	0.901362	0.968118	exon_intron	ENST00000482678	ENSG00000143442	POGZ	---	---	---	---	---
1:151427823|151430841	2.08091	2.62281	1.80575	0.652309	0	3.03976	2.16982	1.23069	-0.939135	0.770569	0.921644	exon	ENST00000409503,ENST00000392723,ENST00000491586,ENST00000271715,ENST00000485040,ENST00000531094,ENST00000358476	ENSG00000143442	POGZ	hsa_circ_0008704	1	151427823	151430841	-
8:140864312|140890769	8.13165	7.958	8.01178	7.88241	8.11093	7.84993	8.03381	7.94775	-0.086058	0.498996	0.921644	exon	ENST00000520475,ENST00000521791,ENST00000517887,ENST00000519993,ENST00000340930,ENST00000523067,ENST00000395218,ENST00000522684,ENST00000521059,ENST00000519419	ENSG00000169398	PTK2	hsa_circ_0002483	8	140864312	140890769	-
1:151563904|151569770	0	1.83985	0	1.44098	0	1.28966	0.613285	0.910213	0.296928	0.879801	0.960239	exon	ENST00000368848,ENST00000392712,ENST00000498606,ENST00000353024,ENST00000368849	ENSG00000143367	TUFT1	hsa_circ_0014182	1	151563904	151569770	+
1:151638888|151639119	0	1.83985	0	0.652309	0	2.76104	0.613285	1.13778	0.524497	0.588632	0.921644	exon	ENST00000368838,ENST00000458013,ENST00000368841,ENST00000368843	ENSG00000143376	SNX27	hsa_circ_0000130	1	151638888	151639119	+
1:151638888|151660862	0	1.83985	0	0	0	0	0.613285	0	-0.613285	0.494453	0.921644	exon	ENST00000368838,ENST00000458013,ENST00000368841,ENST00000368843	ENSG00000143376	SNX27	hsa_circ_0014183	1	151638888	151660862	+
3:138570318|138572984	8.31845	8.11391	7.63076	7.71193	7.63723	7.88562	8.02104	7.74493	-0.276111	0.162258	0.921644	exon	ENST00000484888,ENST00000464035	ENSG00000114107	CEP70	hsa_circ_0003823	3	138570318	138572984	-
1:151638888|151683445	1.38702	0	0	1.44098	0	0	0.46234	0.480325	0.0179858	0.959736	0.983054	exon	ENST00000368838,ENST00000458013,ENST00000368841,ENST00000368843	ENSG00000143376	SNX27	hsa_circ_0014186	1	151638888	151683445	+
1:151658235|151662270	0	0	0	1.94801	0	0	0	0.649335	0.649335	0.47295	0.921644	exon	ENST00000368838,ENST00000458013,ENST00000368841,ENST00000368843	ENSG00000143376	SNX27	---	---	---	---	---
1:151658235|151666011	0	0	1.41363	0	0	0	0.471212	0	-0.471212	0.566201	0.921644	exon	ENST00000368838,ENST00000458013,ENST00000368841,ENST00000368843	ENSG00000143376	SNX27	hsa_circ_0014190	1	151658235	151666011	+
15:64499293|64500166	8.00129	8.34894	7.70167	8.40456	8.06164	7.90314	8.0173	8.12311	0.105815	0.745276	0.921644	exon	ENST00000416172,ENST00000326648	ENSG00000180357	ZNF609	hsa_circ_0000615	15	64499293	64500166	+
10:34269657|34284245	7.91702	8.30254	7.7911	7.99337	8.23468	7.97945	8.00355	8.06917	0.0656145	0.943582	0.981973	exon	ENST00000374790,ENST00000545260,ENST00000374789,ENST00000545693,ENST00000374788,ENST00000350537	ENSG00000148498	PARD3	hsa_circ_0018168	10	34269657	34284245	-
1:151658235|151693039	0	0	0	0.652309	0	0	0	0.217436	0.217436	0.781429	0.921644	exon	ENST00000368838,ENST00000458013,ENST00000368841,ENST00000368843	ENSG00000143376	SNX27	---	---	---	---	---
1:151658235|151693483	0	0	1.80575	0	0	0	0.601917	0	-0.601917	0.475406	0.921644	exon	ENST00000368838,ENST00000458013,ENST00000368841,ENST00000368843	ENSG00000143376	SNX27	---	---	---	---	---
1:152205860|152251758	0	0	0	1.09988	0	0	0	0.366626	0.366626	0.661625	0.921644	exon_intron	ENST00000382265,ENST00000420707,ENST00000429352	ENSG00000237975,ENSG00000236427	FLG-AS1,RP11-107M16.2	---	---	---	---	---
1:152226426|152227051	0	0	0	0.652309	0	0	0	0.217436	0.217436	0.781429	0.921644	intron	ENST00000420707,ENST00000593011	ENSG00000237975	FLG-AS1	---	---	---	---	---
1:152226426|152249012	0	0	0	1.71665	0	1.95955	0	1.2254	1.2254	0.293626	0.921644	exon_intron	ENST00000382265,ENST00000420707	ENSG00000237975	FLG-AS1	---	---	---	---	---
1:152226426|152251758	4.23029	0	0	3.42204	4.04223	1.28966	1.4101	2.91798	1.50788	0.82731	0.940299	exon_intron	ENST00000382265,ENST00000420707	ENSG00000237975	FLG-AS1	---	---	---	---	---
8:18765449|18804898	7.98299	7.81658	8.03027	7.81442	7.52049	7.42186	7.94328	7.58559	-0.35769	0.0872267	0.921644	exon	ENST00000519851,ENST00000286485,ENST00000523619,ENST00000518315,ENST00000440756,ENST00000327040	ENSG00000156011	PSD3	hsa_circ_0002111	8	18765449	18804898	-
1:152314624|152335439	3.62148	2.62281	3.75281	3.49701	0	4.19665	3.33237	2.56455	-0.767815	0.958014	0.983054	exon	ENST00000392688	ENSG00000237975	FLG-AS1	---	---	---	---	---
1:152314624|152338089	0	0	0	0	0	1.95955	0	0.653185	0.653185	0.485036	0.921644	exon	ENST00000392688	ENSG00000237975	FLG-AS1	---	---	---	---	---
1:152314906|152335439	2.89947	0	2.11375	1.94801	3.3625	1.95955	1.67107	2.42335	0.752279	0.73944	0.921644	exon	ENST00000392688,ENST00000420707	ENSG00000237975	FLG-AS1	---	---	---	---	---
X:24172715|24179770	8.16451	7.833	7.82854	8.14675	7.54461	7.92045	7.94202	7.8706	-0.0714158	0.740161	0.921644	exon	ENST00000338565,ENST00000304543,ENST00000379188,ENST00000379177	ENSG00000005889	ZFX	hsa_circ_0007108	X	24172715	24179770	+
1:153663019|153665336	0	0	0	1.94801	0	0	0	0.649335	0.649335	0.47295	0.921644	exon	ENST00000615950,ENST00000361891	ENSG00000143621	ILF2	---	---	---	---	---
1:153663215|153665336	0	0	0	1.09988	0	0	0	0.366626	0.366626	0.661625	0.921644	exon	ENST00000615950,ENST00000361891	ENSG00000143621	ILF2	hsa_circ_0014264	1	153663215	153665336	-
1:153663215|153668557	0	0	0	2.14734	0	0	0	0.715779	0.715779	0.433375	0.921644	exon	ENST00000615950,ENST00000361891	ENSG00000143621	ILF2	hsa_circ_0014266	1	153663215	153668557	-
1:153664043|153665728	0	0	1.41363	1.09988	0	0	0.471212	0.366626	-0.104586	0.926801	0.977053	exon	ENST00000615950,ENST00000361891	ENSG00000143621	ILF2	hsa_circ_0014272	1	153664043	153665728	-
1:153664043|153668557	1.38702	3.1275	0	1.44098	0	1.95955	1.50484	1.13351	-0.371331	0.650207	0.921644	exon	ENST00000615950,ENST00000361891	ENSG00000143621	ILF2	---	---	---	---	---
3:172247533|172251541	7.92663	7.71396	8.13219	8.10542	7.56833	7.96284	7.92426	7.87886	-0.0453988	0.776869	0.921644	exon	ENST00000416957,ENST00000415807,ENST00000469491,ENST00000336824	ENSG00000075420	FNDC3B	hsa_circ_0006156	3	172247533	172251541	+
1:153667555|153668557	0	0	0	0.652309	0	0	0	0.217436	0.217436	0.781429	0.921644	exon	ENST00000615950,ENST00000368684,ENST00000361891,ENST00000368681	ENSG00000143621	ILF2	---	---	---	---	---
1:153682498|153685084	0	0	0	0	2.84602	0	0	0.948672	0.948672	0.330659	0.921644	exon	ENST00000368680	ENSG00000169418	NPR1	---	---	---	---	---
1:153740651|153757763	0	0	0	0	0	1.28966	0	0.429887	0.429887	0.635324	0.921644	exon	ENST00000435409,ENST00000318967,ENST00000481797	ENSG00000143624	INTS3	---	---	---	---	---
1:153748689|153757763	1.38702	0	0.873449	0.652309	0	1.28966	0.753489	0.647324	-0.106165	0.929256	0.977053	exon	ENST00000435409,ENST00000318967,ENST00000481797	ENSG00000143624	INTS3	hsa_circ_0014289	1	153748689	153757763	+
1:153748689|153760918	0	1.83985	0	0	0	0	0.613285	0	-0.613285	0.494453	0.921644	exon	ENST00000435409,ENST00000318967,ENST00000481797	ENSG00000143624	INTS3	---	---	---	---	---
1:153751095|153757763	0	0	2.58309	2.74778	0	0	0.861031	0.915926	0.0548954	0.959622	0.983054	exon	ENST00000435409,ENST00000318967,ENST00000481797,ENST00000512605	ENSG00000143624	INTS3	hsa_circ_0014292	1	153751095	153757763	+
1:153752279|153757763	0	0	1.41363	0.652309	0	0	0.471212	0.217436	-0.253775	0.800965	0.931732	exon	ENST00000435409,ENST00000318967,ENST00000480659,ENST00000481797,ENST00000476843,ENST00000512605	ENSG00000143624	INTS3	hsa_circ_0014295	1	153752279	153757763	+
1:153752279|153759613	1.38702	0	2.77067	0	2.03388	1.95955	1.3859	1.33115	-0.054751	0.788914	0.927042	exon	ENST00000435409,ENST00000318967,ENST00000480659,ENST00000481797,ENST00000476843,ENST00000512605	ENSG00000143624	INTS3	---	---	---	---	---
1:153754642|153757763	0	0	0	1.71665	0	0	0	0.572217	0.572217	0.523576	0.921644	exon	ENST00000435409,ENST00000318967,ENST00000480659,ENST00000481797,ENST00000476843,ENST00000512605	ENSG00000143624	INTS3	hsa_circ_0005964	1	153754642	153757763	+
1:153759526|153765063	0	1.83985	0	0	0	0	0.613285	0	-0.613285	0.494453	0.921644	exon	ENST00000435409,ENST00000318967,ENST00000481797,ENST00000476843,ENST00000512605	ENSG00000143624	INTS3	hsa_circ_0005948	1	153759526	153765063	+
1:153760311|153765063	0	0	0	0.652309	0	1.28966	0	0.647324	0.647324	0.555025	0.921644	exon	ENST00000435409,ENST00000318967,ENST00000481797,ENST00000476843,ENST00000512605	ENSG00000143624	INTS3	hsa_circ_0014303	1	153760311	153765063	+
1:153761570|153765063	0	4.04251	3.34375	3.56827	0	0	2.46209	1.18942	-1.27266	0.713983	0.921644	exon	ENST00000435409,ENST00000318967,ENST00000503133,ENST00000481797,ENST00000476843,ENST00000512605	ENSG00000143624	INTS3	hsa_circ_0014306	1	153761570	153765063	+
1:153762728|153765063	0	3.1275	0	0.652309	0	0	1.0425	0.217436	-0.825065	0.43463	0.921644	exon	ENST00000435409,ENST00000318967,ENST00000503133,ENST00000481797,ENST00000476843,ENST00000512605	ENSG00000143624	INTS3	hsa_circ_0006939	1	153762728	153765063	+
13:100257595|100273346	8.01036	7.98763	7.76374	8.12623	7.39346	7.61497	7.92058	7.71156	-0.209021	0.440803	0.921644	exon	ENST00000376279,ENST00000637657,ENST00000376286,ENST00000636475,ENST00000376285,ENST00000636366,ENST00000636420	ENSG00000175198	PCCA	hsa_circ_0000500	13	100257595	100273346	+
1:153811731|153819735	0	0	0	1.44098	0	1.28966	0	0.910213	0.910213	0.436586	0.921644	exon	ENST00000368655,ENST00000634408,ENST00000634544	ENSG00000143614	GATAD2B	---	---	---	---	---
1:153818791|153819735	0	2.62281	0.873449	1.94801	3.3625	0	1.16542	1.77017	0.604748	0.576879	0.921644	exon	ENST00000368655,ENST00000634408,ENST00000634544	ENSG00000143614	GATAD2B	---	---	---	---	---
1:153932861|153933319	0	0	0	1.71665	0	0	0	0.572217	0.572217	0.523576	0.921644	exon	ENST00000368646,ENST00000361217	ENSG00000198837	DENND4B	---	---	---	---	---
1:153937488|153937863	0	2.62281	2.36742	0	0	0	1.66341	0	-1.66341	0.174266	0.921644	exon	ENST00000368646,ENST00000361217	ENSG00000198837	DENND4B	hsa_circ_0004041	1	153937488	153937863	-
1:153954255|153955166	0	0	0.873449	0	0	0	0.29115	0	-0.29115	0.69286	0.921644	exon	ENST00000476883,ENST00000368633,ENST00000487235	ENSG00000160741	CRTC2	---	---	---	---	---
1:154056815|154061046	0	0	1.41363	0	0	0	0.471212	0	-0.471212	0.566201	0.921644	exon	ENST00000271854,ENST00000368559	ENSG00000143552	NUP210L	---	---	---	---	---
1:154170400|154173201	0	0	1.41363	0	0	0	0.471212	0	-0.471212	0.566201	0.921644	exon	ENST00000469717,ENST00000368533,ENST00000368530,ENST00000302206,ENST00000368531,ENST00000509409,ENST00000323144,ENST00000330188,ENST00000341372,ENST00000271850,ENST00000312970,ENST00000611659,ENST00000328159	ENSG00000143549	TPM3	---	---	---	---	---
1:154170400|154176248	0	0	0	0	0	1.95955	0	0.653185	0.653185	0.485036	0.921644	exon	ENST00000368533,ENST00000368530,ENST00000302206,ENST00000368531,ENST00000341485,ENST00000323144,ENST00000330188,ENST00000271850,ENST00000611659,ENST00000328159	ENSG00000143549	TPM3	---	---	---	---	---
1:154172908|154173201	0	0	0	0.652309	0	0	0	0.217436	0.217436	0.781429	0.921644	exon	ENST00000469717,ENST00000473036,ENST00000368527,ENST00000368533,ENST00000368530,ENST00000302206,ENST00000368531,ENST00000505010,ENST00000509409,ENST00000323144,ENST00000330188,ENST00000341372,ENST00000271850,ENST00000312970,ENST00000611659,ENST00000328159	ENSG00000143549	TPM3	hsa_circ_0008368	1	154172908	154173201	-
1:154172908|154176248	0	0	0	1.94801	0	0	0	0.649335	0.649335	0.47295	0.921644	exon	ENST00000473036,ENST00000368527,ENST00000368533,ENST00000368530,ENST00000302206,ENST00000368531,ENST00000341485,ENST00000323144,ENST00000330188,ENST00000271850,ENST00000611659,ENST00000328159	ENSG00000143549	TPM3	---	---	---	---	---
1:154212320|154214574	0	1.83985	0	2.32244	0	0	0.613285	0.774146	0.160862	0.802183	0.931732	exon	ENST00000368519,ENST00000368518,ENST00000350592,ENST00000368521,ENST00000362076,ENST00000368516	ENSG00000143612	C1orf43	hsa_circ_0014365	1	154212320	154214574	-
1:154225084|154246375	0	1.83985	0	0	0	0	0.613285	0	-0.613285	0.494453	0.921644	exon	ENST00000361546,ENST00000368504,ENST00000271877,ENST00000428931,ENST00000613315,ENST00000343815	ENSG00000143569	UBAP2L	---	---	---	---	---
1:154227282|154236611	0	0	0	0	0	1.28966	0	0.429887	0.429887	0.635324	0.921644	exon	ENST00000412596,ENST00000361546,ENST00000368504,ENST00000437652,ENST00000456325,ENST00000271877,ENST00000428931,ENST00000613315,ENST00000343815	ENSG00000143569	UBAP2L	---	---	---	---	---
6:72295937|72333835	7.76461	7.39817	8.52002	8.31157	5.90222	7.18459	7.89427	7.13279	-0.761471	0.469305	0.921644	exon	ENST00000522211	ENSG00000079841	RIMS1	---	---	---	---	---
1:154234591|154246375	0	0	1.80575	1.71665	0	0	0.601917	0.572217	-0.0296999	0.975893	0.990186	exon	ENST00000361546,ENST00000368504,ENST00000271877,ENST00000428931,ENST00000613315,ENST00000343815	ENSG00000143569	UBAP2L	hsa_circ_0014375	1	154234591	154246375	+
1:154234591|154251653	0	0	0	1.09988	0	0	0	0.366626	0.366626	0.661625	0.921644	exon	ENST00000361546,ENST00000271877,ENST00000428931,ENST00000613315,ENST00000343815	ENSG00000143569	UBAP2L	hsa_circ_0014376	1	154234591	154251653	+
1:154241513|154246375	0	1.83985	0.873449	1.71665	0	1.95955	0.904434	1.2254	0.320968	0.765128	0.921644	exon	ENST00000361546,ENST00000368504,ENST00000271877,ENST00000428931,ENST00000613315,ENST00000343815	ENSG00000143569	UBAP2L	hsa_circ_0006849	1	154241513	154246375	+
1:154241513|154249437	0	0	0	0	0	2.76104	0	0.920346	0.920346	0.321336	0.921644	exon	ENST00000361546,ENST00000271877,ENST00000428931,ENST00000613315,ENST00000343815	ENSG00000143569	UBAP2L	---	---	---	---	---
1:154241513|154251653	2.08091	0	0	0	0	0	0.693638	0	-0.693638	0.429293	0.921644	exon	ENST00000361546,ENST00000271877,ENST00000428931,ENST00000613315,ENST00000343815	ENSG00000143569	UBAP2L	---	---	---	---	---
1:154249239|154251653	2.54748	1.83985	2.77067	2.86562	0	3.47417	2.386	2.11326	-0.272739	0.777165	0.921644	exon	ENST00000361546,ENST00000271877,ENST00000428931,ENST00000613315,ENST00000343815	ENSG00000143569	UBAP2L	hsa_circ_0006433	1	154249239	154251653	+
16:53873786|53888951	7.90735	8.10041	7.65479	7.41608	8.15859	7.28155	7.88751	7.61874	-0.268778	0.247475	0.921644	exon	ENST00000637845,ENST00000637001,ENST00000636491,ENST00000636218,ENST00000637562,ENST00000636992,ENST00000471389,ENST00000464071,ENST00000563011,ENST00000637969,ENST00000636030	ENSG00000140718	FTO	hsa_circ_0005941	16	53873786	53888951	+
1:154251041|154257434	1.38702	0	2.77067	0	0	2.76104	1.3859	0.920346	-0.465552	0.882327	0.960332	exon	ENST00000361546,ENST00000271877,ENST00000428931,ENST00000613315,ENST00000343815	ENSG00000143569	UBAP2L	hsa_circ_0014391	1	154251041	154257434	+
1:154253900|154255755	0	1.83985	2.58309	0.652309	0	2.41525	1.47432	1.02252	-0.451795	0.749546	0.921644	exon	ENST00000361546,ENST00000271877,ENST00000428931,ENST00000613315,ENST00000343815	ENSG00000143569	UBAP2L	hsa_circ_0014394	1	154253900	154255755	+
1:154253900|154260029	0	0	1.80575	0	0	0	0.601917	0	-0.601917	0.475406	0.921644	exon	ENST00000361546,ENST00000271877,ENST00000428931,ENST00000613315,ENST00000343815	ENSG00000143569	UBAP2L	hsa_circ_0014395	1	154253900	154260029	+
1:154260892|154266568	0	2.62281	1.41363	2.86562	3.74203	3.27325	1.34548	3.29364	1.94816	0.063505	0.921644	exon	ENST00000361546,ENST00000428595,ENST00000271877,ENST00000428931,ENST00000433615	ENSG00000143569	UBAP2L	hsa_circ_0014414	1	154260892	154266568	+
1:154328105|154331146	2.08091	0	0	0	0	0	0.693638	0	-0.693638	0.429293	0.921644	exon	ENST00000368489,ENST00000368487	ENSG00000143515	ATP8B2	---	---	---	---	---
1:154330396|154334591	1.38702	0	0	0	0	0	0.46234	0	-0.46234	0.58606	0.921644	exon	ENST00000426445,ENST00000368489,ENST00000368487	ENSG00000143515	ATP8B2	---	---	---	---	---
1:154331954|154337544	0	0	0	1.09988	0	0	0	0.366626	0.366626	0.661625	0.921644	exon	ENST00000426445,ENST00000368489,ENST00000368487	ENSG00000143515	ATP8B2	---	---	---	---	---
1:154344971|154345545	0	0	0	0.652309	0	0	0	0.217436	0.217436	0.781429	0.921644	exon	ENST00000368489	ENSG00000143515	ATP8B2	---	---	---	---	---
1:154434519|154435156	1.38702	0	3.56273	0.652309	3.3625	2.76104	1.64992	2.25861	0.608698	0.936821	0.981415	exon	ENST00000476006,ENST00000344086,ENST00000622330,ENST00000368485	ENSG00000160712	IL6R	---	---	---	---	---
1:154434519|154436110	2.08091	0	0	0	0	3.03976	0.693638	1.01325	0.319615	0.765114	0.921644	exon	ENST00000476006,ENST00000344086,ENST00000622330,ENST00000368485	ENSG00000160712	IL6R	---	---	---	---	---
1:154434990|154449980	0	0	0.873449	0	0	0	0.29115	0	-0.29115	0.69286	0.921644	exon	ENST00000515190,ENST00000344086,ENST00000368485	ENSG00000160712	IL6R	---	---	---	---	---
1:154448125|154454581	2.08091	0	0	0	0	0	0.693638	0	-0.693638	0.429293	0.921644	exon	ENST00000515190,ENST00000507256,ENST00000368485	ENSG00000160712	IL6R	hsa_circ_0014425	1	154448125	154454581	+
1:154506877|154521479	1.38702	0	2.77067	0	4.04223	0	1.3859	1.34741	-0.0384863	0.788808	0.92697	exon	ENST00000368482,ENST00000368480	ENSG00000163239	TDRD10	---	---	---	---	---
1:154506877|154542821	0	0	0	0	2.84602	0	0	0.948672	0.948672	0.330659	0.921644	exon	ENST00000368482,ENST00000368480	ENSG00000163239	TDRD10	---	---	---	---	---
1:154508423|154520374	0	0	1.80575	0	0	0	0.601917	0	-0.601917	0.475406	0.921644	exon	ENST00000368482,ENST00000368480	ENSG00000163239	TDRD10	---	---	---	---	---
1:154508423|154521479	0	0	2.11375	0.652309	0	0	0.704583	0.217436	-0.487147	0.606858	0.921644	exon	ENST00000368482,ENST00000368480	ENSG00000163239	TDRD10	---	---	---	---	---
1:154508423|154542066	0	0	0.873449	0	0	0	0.29115	0	-0.29115	0.69286	0.921644	exon	ENST00000368482,ENST00000368480	ENSG00000163239	TDRD10	---	---	---	---	---
1:154586181|154588258	0	0	0	1.44098	0	0	0	0.480325	0.480325	0.5841	0.921644	exon	ENST00000529168,ENST00000534279,ENST00000368474,ENST00000368471,ENST00000530954	ENSG00000160710	ADAR	hsa_circ_0014436	1	154586181	154588258	-
1:154588125|154588673	0	0	0	0.652309	0	0	0	0.217436	0.217436	0.781429	0.921644	exon	ENST00000529168,ENST00000368474,ENST00000368471	ENSG00000160710	ADAR	---	---	---	---	---
1:154588551|154597267	1.38702	1.83985	1.41363	2.86562	0	1.95955	1.54684	1.60839	0.061556	0.643113	0.921644	exon	ENST00000529168,ENST00000368474,ENST00000368471	ENSG00000160710	ADAR	hsa_circ_0005423	1	154588551	154597267	-
1:154725916|154737088	0	0	0	0	0	1.95955	0	0.653185	0.653185	0.485036	0.921644	exon	ENST00000618040	ENSG00000143603	KCNN3	---	---	---	---	---
1:154951232|154951921	0	2.62281	0	1.09988	0	2.41525	0.874269	1.17171	0.29744	0.931432	0.977349	exon	ENST00000368463,ENST00000368460,ENST00000493133,ENST00000490230	ENSG00000163346	PBXIP1	hsa_circ_0014452	1	154951232	154951921	-
1:154967671|154969448	1.38702	0	2.58309	0	2.03388	0	1.32337	0.677962	-0.645409	0.567273	0.921644	exon	ENST00000412170,ENST00000368450,ENST00000368445,ENST00000448116,ENST00000368453	ENSG00000160691	SHC1	hsa_circ_0014463	1	154967671	154969448	-
1:154970045|154970475	0	0	0	0	2.03388	0	0	0.677962	0.677962	0.50093	0.921644	exon	ENST00000368445,ENST00000448116	ENSG00000160691	SHC1	---	---	---	---	---
1:15504611|15518395	0	0	0	1.09988	0	0	0	0.366626	0.366626	0.661625	0.921644	exon	ENST00000333868,ENST00000546424,ENST00000375890,ENST00000474305,ENST00000447522,ENST00000400777	ENSG00000132906	CASP9	---	---	---	---	---
1:155060344|155060749	0	0	0	0.652309	0	0	0	0.217436	0.217436	0.781429	0.921644	intron	ENST00000472434,ENST00000531455,ENST00000462116,ENST00000368412,ENST00000356955,ENST00000527418,ENST00000526491,ENST00000368413,ENST00000359280,ENST00000449910,ENST00000360674,ENST00000474709,ENST00000271836,ENST00000461564,ENST00000529473,ENST00000461234,ENST00000468053,ENST00000355956,ENST00000498481	ENSG00000143537	ADAM15	---	---	---	---	---
1:15506899|15507907	0	0	0	1.94801	0	0	0	0.649335	0.649335	0.47295	0.921644	exon	ENST00000333868,ENST00000546424,ENST00000375890,ENST00000474305,ENST00000447522,ENST00000400777,ENST00000440484	ENSG00000132906	CASP9	---	---	---	---	---
1:15518110|15518395	3.62148	2.62281	2.93665	2.32244	0	0	3.06031	0.774146	-2.28617	0.0919939	0.921644	exon	ENST00000333868,ENST00000546969,ENST00000546424,ENST00000375890,ENST00000447522,ENST00000348549,ENST00000400777,ENST00000440484	ENSG00000132906	CASP9	hsa_circ_0010039	1	15518110	15518395	-
1:155237341|155238650	0	0	1.41363	0	0	0	0.471212	0	-0.471212	0.566201	0.921644	exon	ENST00000427500,ENST00000368373,ENST00000497670,ENST00000491081,ENST00000428024,ENST00000327247	ENSG00000177628	GBA	---	---	---	---	---
1:155237341|155240077	0	0	0	1.09988	0	0	0	0.366626	0.366626	0.661625	0.921644	exon	ENST00000427500,ENST00000368373,ENST00000428024,ENST00000327247	ENSG00000177628	GBA	---	---	---	---	---
1:155239616|155240077	0	0	0	1.44098	0	0	0	0.480325	0.480325	0.5841	0.921644	exon	ENST00000368373,ENST00000493842,ENST00000428024,ENST00000473570,ENST00000327247	ENSG00000177628	GBA	hsa_circ_0014507	1	155239616	155240077	-
1:155265860|155266895	0	0	0.873449	0	0	0	0.29115	0	-0.29115	0.69286	0.921644	exon	ENST00000361168,ENST00000355560,ENST00000476983,ENST00000497188,ENST00000368361	ENSG00000176444	CLK2	hsa_circ_0014528	1	155265860	155266895	-
1:155265860|155270977	0	0	0	0.652309	0	0	0	0.217436	0.217436	0.781429	0.921644	exon	ENST00000361168,ENST00000355560,ENST00000476983,ENST00000368361	ENSG00000176444	CLK2	---	---	---	---	---
1:155268708|155269713	0	0	0	0	0	2.41525	0	0.805084	0.805084	0.395572	0.921644	exon	ENST00000361168,ENST00000471047,ENST00000355560,ENST00000368361	ENSG00000176444	CLK2	---	---	---	---	---
1:155268934|155269487	0	0	0.873449	0	0	0	0.29115	0	-0.29115	0.69286	0.921644	exon_intron	ENST00000484699,ENST00000497188	ENSG00000176444	CLK2	---	---	---	---	---
1:155269488|155270977	0	0	0	0	0	1.28966	0	0.429887	0.429887	0.635324	0.921644	exon	ENST00000361168,ENST00000471047,ENST00000355560,ENST00000476983,ENST00000368361	ENSG00000176444	CLK2	---	---	---	---	---
1:15529088|15536814	0	2.62281	1.80575	0.652309	0	0	1.47619	0.217436	-1.25875	0.271703	0.921644	exon	ENST00000375838,ENST00000375849,ENST00000475133,ENST00000375847	ENSG00000116138	DNAJC16	---	---	---	---	---
1:15529088|15546871	0	0	0	0	0	1.28966	0	0.429887	0.429887	0.635324	0.921644	exon	ENST00000375838,ENST00000375849,ENST00000475133,ENST00000375847	ENSG00000116138	DNAJC16	hsa_circ_0010040	1	15529088	15546871	+
1:15529088|15548428	1.38702	2.62281	0	0	0	0	1.33661	0	-1.33661	0.200534	0.921644	exon	ENST00000375838,ENST00000375849,ENST00000475133,ENST00000375847	ENSG00000116138	DNAJC16	hsa_circ_0010041	1	15529088	15548428	+
1:15529088|15562325	0	1.83985	0	0	0	0	0.613285	0	-0.613285	0.494453	0.921644	exon	ENST00000375838,ENST00000375849,ENST00000475133,ENST00000375847	ENSG00000116138	DNAJC16	---	---	---	---	---
1:15529088|15567269	0	0	0	0.652309	0	0	0	0.217436	0.217436	0.781429	0.921644	exon	ENST00000375849,ENST00000475133,ENST00000375847	ENSG00000116138	DNAJC16	---	---	---	---	---
1:155338089|155338390	0	0	0.873449	0	0	0	0.29115	0	-0.29115	0.69286	0.921644	exon	ENST00000368346,ENST00000392403	ENSG00000116539	ASH1L	---	---	---	---	---
1:155338089|155343486	0	0	1.80575	0	0	0	0.601917	0	-0.601917	0.475406	0.921644	exon	ENST00000368346,ENST00000392403	ENSG00000116539	ASH1L	---	---	---	---	---
1:155338089|155344273	0	0	0	1.71665	0	0	0	0.572217	0.572217	0.523576	0.921644	exon	ENST00000368346,ENST00000392403	ENSG00000116539	ASH1L	---	---	---	---	---
1:155341936|155349596	0	0	0	0	0	1.28966	0	0.429887	0.429887	0.635324	0.921644	exon	ENST00000368346,ENST00000392403	ENSG00000116539	ASH1L	---	---	---	---	---
9:33953285|33963791	7.53257	7.81658	8.29773	8.27477	8.02782	8.32319	7.8823	8.20859	0.326298	0.292418	0.921644	exon	ENST00000360802,ENST00000379238,ENST00000629575,ENST00000412543	ENSG00000137073	UBAP2	hsa_circ_0001847	9	33953285	33963791	-
1:15534237|15544583	0	0	0	0.652309	0	0	0	0.217436	0.217436	0.781429	0.921644	exon	ENST00000616884,ENST00000375838,ENST00000375849,ENST00000475133,ENST00000375847	ENSG00000116138	DNAJC16	---	---	---	---	---
1:15534237|15546871	0	0	3.22039	0	0	0	1.07346	0	-1.07346	0.248035	0.921644	exon	ENST00000616884,ENST00000375838,ENST00000375849,ENST00000475133,ENST00000375847	ENSG00000116138	DNAJC16	---	---	---	---	---
1:15534237|15548428	3.1822	1.83985	2.58309	2.32244	2.03388	0	2.53505	1.45211	-1.08294	0.385877	0.921644	exon	ENST00000616884,ENST00000375838,ENST00000375849,ENST00000475133,ENST00000375847	ENSG00000116138	DNAJC16	hsa_circ_0009118	1	15534237	15548428	+
1:155343314|155346469	0	0	1.41363	2.32244	0	0	0.471212	0.774146	0.302935	0.725991	0.921644	exon	ENST00000368346,ENST00000392403	ENSG00000116539	ASH1L	hsa_circ_0014551	1	155343314	155346469	-
1:155343314|155349596	0	0	0	1.44098	0	0	0	0.480325	0.480325	0.5841	0.921644	exon	ENST00000368346,ENST00000392403	ENSG00000116539	ASH1L	---	---	---	---	---
1:155346383|155347904	2.08091	1.83985	2.36742	3.07585	0	2.41525	2.09606	1.83037	-0.265696	0.817635	0.937522	exon	ENST00000368346,ENST00000392403,ENST00000492987	ENSG00000116539	ASH1L	hsa_circ_0014558	1	155346383	155347904	-
1:155346383|155349596	0	0	2.36742	0	0	0	0.789141	0	-0.789141	0.368163	0.921644	exon	ENST00000368346,ENST00000392403	ENSG00000116539	ASH1L	---	---	---	---	---
1:155346383|155357410	0	0	0	2.14734	0	0	0	0.715779	0.715779	0.433375	0.921644	exon	ENST00000368346,ENST00000392403	ENSG00000116539	ASH1L	---	---	---	---	---
1:155347656|155349596	2.08091	2.62281	1.41363	1.09988	0	1.28966	2.03912	0.796513	-1.24261	0.318589	0.921644	exon	ENST00000368346,ENST00000392403	ENSG00000116539	ASH1L	---	---	---	---	---
1:155349327|155354630	2.08091	0	0	0	0	2.76104	0.693638	0.920346	0.226707	0.830157	0.941209	exon	ENST00000368346,ENST00000392403	ENSG00000116539	ASH1L	hsa_circ_0006572	1	155349327	155354630	-
1:155352706|155354630	0	0	2.58309	1.71665	3.74203	0	0.861031	1.81956	0.958531	0.633213	0.921644	exon	ENST00000368346,ENST00000392403	ENSG00000116539	ASH1L	---	---	---	---	---
1:155352706|155357410	0	0	0	1.09988	0	0	0	0.366626	0.366626	0.661625	0.921644	exon	ENST00000368346,ENST00000392403	ENSG00000116539	ASH1L	---	---	---	---	---
1:155352706|155357749	2.08091	3.1275	0	0	0	2.76104	1.73614	0.920346	-0.815794	0.766721	0.921644	exon	ENST00000368346,ENST00000392403	ENSG00000116539	ASH1L	hsa_circ_0014566	1	155352706	155357749	-
1:155352706|155360409	0	0	0	1.09988	0	0	0	0.366626	0.366626	0.661625	0.921644	exon	ENST00000368346,ENST00000392403	ENSG00000116539	ASH1L	---	---	---	---	---
1:155352706|155395553	0	0	0	0.652309	0	0	0	0.217436	0.217436	0.781429	0.921644	exon	ENST00000368346,ENST00000392403	ENSG00000116539	ASH1L	---	---	---	---	---
1:155354473|155360409	2.08091	0	0	0	0	0	0.693638	0	-0.693638	0.429293	0.921644	exon	ENST00000368346,ENST00000392403	ENSG00000116539	ASH1L	---	---	---	---	---
1:155357316|155357749	0	0	1.41363	0	0	0	0.471212	0	-0.471212	0.566201	0.921644	exon	ENST00000368346,ENST00000392403	ENSG00000116539	ASH1L	---	---	---	---	---
1:155357316|155360409	0	0	0	0.652309	0	0	0	0.217436	0.217436	0.781429	0.921644	exon	ENST00000368346,ENST00000392403	ENSG00000116539	ASH1L	hsa_circ_0014572	1	155357316	155360409	-
1:155357316|155395553	0	0	1.41363	0	0	0	0.471212	0	-0.471212	0.566201	0.921644	exon	ENST00000368346,ENST00000392403	ENSG00000116539	ASH1L	---	---	---	---	---
1:155360301|155370983	0	3.1275	0	0	0	0	1.0425	0	-1.0425	0.267733	0.921644	exon	ENST00000368346,ENST00000392403	ENSG00000116539	ASH1L	---	---	---	---	---
1:155360301|155395553	1.38702	0	0.873449	0	0	0	0.753489	0	-0.753489	0.476856	0.921644	exon	ENST00000368346,ENST00000392403	ENSG00000116539	ASH1L	---	---	---	---	---
1:15536475|15536814	2.54748	2.62281	2.58309	1.94801	0	2.76104	2.58446	1.56968	-1.01478	0.559427	0.921644	exon	ENST00000616884,ENST00000375838,ENST00000375849,ENST00000475133,ENST00000375847	ENSG00000116138	DNAJC16	hsa_circ_0002898	1	15536475	15536814	+
1:15536475|15548428	0	0	2.36742	0	0	0	0.789141	0	-0.789141	0.368163	0.921644	exon	ENST00000616884,ENST00000375838,ENST00000375849,ENST00000475133,ENST00000375847	ENSG00000116138	DNAJC16	---	---	---	---	---
1:15536475|15567269	1.38702	0	0	0	0	0	0.46234	0	-0.46234	0.58606	0.921644	exon	ENST00000616884,ENST00000375849,ENST00000475133,ENST00000375847	ENSG00000116138	DNAJC16	---	---	---	---	---
2:226864604|226914351	7.7321	7.67807	8.1492	7.89978	7.99319	8.10588	7.85312	7.99962	0.146495	0.712443	0.921644	exon	ENST00000392062,ENST00000341329	ENSG00000144468	RHBDD1	hsa_circ_0058495	2	226864604	226914351	+
1:155370504|155395553	1.38702	0	2.77067	2.32244	2.84602	0	1.3859	1.72282	0.336921	0.876578	0.958189	exon	ENST00000368346,ENST00000392403	ENSG00000116539	ASH1L	hsa_circ_0014577	1	155370504	155395553	-
1:155370504|155459898	2.08091	0	0	0	0	0	0.693638	0	-0.693638	0.429293	0.921644	exon	ENST00000368346,ENST00000392403	ENSG00000116539	ASH1L	hsa_circ_0014579	1	155370504	155459898	-
1:155378281|155395553	0	2.62281	2.93665	1.44098	0	1.28966	1.85315	0.910213	-0.942939	0.327934	0.921644	exon	ENST00000368346,ENST00000392403	ENSG00000116539	ASH1L	---	---	---	---	---
1:155378281|155415923	3.4185	2.62281	2.11375	2.32244	0	1.95955	2.71835	1.42733	-1.29102	0.311734	0.921644	exon	ENST00000368346,ENST00000392403	ENSG00000116539	ASH1L	hsa_circ_0002897	1	155378281	155415923	-
1:155395459|155439068	0	1.83985	0	0	0	1.28966	0.613285	0.429887	-0.183397	0.868635	0.953201	exon	ENST00000368346,ENST00000392403	ENSG00000116539	ASH1L	---	---	---	---	---
1:155395459|155459898	4.23029	2.62281	2.11375	4.03874	0	2.41525	2.98895	2.15133	-0.837621	0.805524	0.933442	exon	ENST00000368346,ENST00000392403	ENSG00000116539	ASH1L	hsa_circ_0014584	1	155395459	155459898	-
1:155408142|155415923	2.08091	3.1275	2.93665	0	0	3.8076	2.71502	1.2692	-1.44582	0.833193	0.941209	exon_intron	ENST00000368346,ENST00000392403	ENSG00000116539	ASH1L	hsa_circ_0008161	1	155408142	155415923	-
1:155415744|155439068	0	0	0	2.14734	0	0	0	0.715779	0.715779	0.433375	0.921644	exon	ENST00000368346,ENST00000392403	ENSG00000116539	ASH1L	hsa_circ_0014585	1	155415744	155439068	-
7:129014979|129018157	7.72109	8.08679	7.74148	7.83984	7.74523	7.94603	7.84979	7.8437	-0.00608432	0.851149	0.947225	exon	ENST00000627585,ENST00000482320,ENST00000471166,ENST00000471234,ENST00000265388	ENSG00000064419	TNPO3	hsa_circ_0001741	7	129014979	129018157	-
20:2964272|2965202	8.2512	7.84923	7.38722	7.72758	7.33934	7.64652	7.82922	7.57115	-0.258067	0.233353	0.921644	exon	ENST00000380393,ENST00000430705,ENST00000216877,ENST00000455631,ENST00000356147,ENST00000318266,ENST00000399903,ENST00000431048	ENSG00000132670	PTPRA	hsa_circ_0006117	20	2964272	2965202	+
1:155438327|155440593	1.38702	0	0	0	0	0	0.46234	0	-0.46234	0.58606	0.921644	exon_intron	ENST00000368346,ENST00000392403	ENSG00000116539	ASH1L	---	---	---	---	---
9:135881633|135883078	7.4146	7.833	8.22738	8.20101	8.24943	8.32319	7.82499	8.25788	0.432884	0.143433	0.921644	exon	ENST00000409386,ENST00000389532	ENSG00000130559	CAMSAP1	hsa_circ_0001900	9	135881633	135883078	-
1:155521100|155521618	2.89947	0	0	0	0	0	0.966489	0	-0.966489	0.255082	0.921644	exon	ENST00000368346,ENST00000392403,ENST00000548830	ENSG00000116539	ASH1L	hsa_circ_0014592	1	155521100	155521618	-
1:15562142|15564359	0	0	2.36742	0	0	0	0.789141	0	-0.789141	0.368163	0.921644	exon	ENST00000616884,ENST00000375838,ENST00000375849,ENST00000475133,ENST00000375847,ENST00000483270	ENSG00000116138	DNAJC16	hsa_circ_0010046	1	15562142	15564359	+
1:15563929|15564359	0	0	2.93665	1.44098	0	0	0.978882	0.480325	-0.498557	0.633509	0.921644	exon	ENST00000616884,ENST00000375838,ENST00000375849,ENST00000475133,ENST00000375847,ENST00000483270	ENSG00000116138	DNAJC16	hsa_circ_0010047	1	15563929	15564359	+
1:155661307|155773210	0	0	1.41363	0	2.03388	0	0.471212	0.677962	0.20675	0.883371	0.960332	exon_intron	ENST00000359205,ENST00000477470,ENST00000483032,ENST00000471341,ENST00000368331,ENST00000466366,ENST00000368330,ENST00000454523,ENST00000473267,ENST00000615926,ENST00000368339,ENST00000405763,ENST00000361831,ENST00000622608,ENST00000361040,ENST00000354691,ENST00000404643,ENST00000295566,ENST00000497369,ENST00000493625,ENST00000311573,ENST00000496021,ENST00000443231,ENST00000490801,ENST00000347088…	ENSG00000163374,ENSG00000116580,ENSG00000227673	YY1AP1,GON4L,RP11-243J18.2	---	---	---	---	---
1:155668627|155773210	0	0	0	0	0	1.28966	0	0.429887	0.429887	0.635324	0.921644	exon_intron	ENST00000359205,ENST00000477470,ENST00000483032,ENST00000471341,ENST00000368331,ENST00000466366,ENST00000368330,ENST00000454523,ENST00000473267,ENST00000615926,ENST00000368339,ENST00000405763,ENST00000361831,ENST00000622608,ENST00000361040,ENST00000354691,ENST00000404643,ENST00000295566,ENST00000497369,ENST00000493625,ENST00000311573,ENST00000496021,ENST00000443231,ENST00000490801,ENST00000347088…	ENSG00000163374,ENSG00000116580,ENSG00000227673	YY1AP1,GON4L,RP11-243J18.2	---	---	---	---	---
1:155668627|155777820	1.38702	0	0	1.09988	0	0	0.46234	0.366626	-0.0957141	0.951077	0.983054	exon_intron	ENST00000359205,ENST00000477470,ENST00000483032,ENST00000471341,ENST00000368331,ENST00000466366,ENST00000368330,ENST00000454523,ENST00000473267,ENST00000615926,ENST00000368339,ENST00000405763,ENST00000361831,ENST00000622608,ENST00000361040,ENST00000354691,ENST00000404643,ENST00000295566,ENST00000466224,ENST00000497369,ENST00000493625,ENST00000311573,ENST00000496021,ENST00000443231,ENST00000490801…	ENSG00000163374,ENSG00000116580,ENSG00000227673	YY1AP1,GON4L,RP11-243J18.2	---	---	---	---	---
1:155670320|155675096	0	0	0	0	0	3.03976	0	1.01325	1.01325	0.298236	0.921644	exon	ENST00000359205,ENST00000368330,ENST00000368339,ENST00000405763,ENST00000361831,ENST00000404643,ENST00000295566,ENST00000493625,ENST00000311573,ENST00000347088,ENST00000355499,ENST00000368340,ENST00000436865,ENST00000407221,ENST00000361140	ENSG00000163374	YY1AP1	---	---	---	---	---
1:155670320|155679512	0	0	0	0	0	1.28966	0	0.429887	0.429887	0.635324	0.921644	exon	ENST00000359205,ENST00000368330,ENST00000368339,ENST00000405763,ENST00000361831,ENST00000404643,ENST00000295566,ENST00000493625,ENST00000311573,ENST00000347088,ENST00000355499,ENST00000368340,ENST00000436865,ENST00000407221,ENST00000361140	ENSG00000163374	YY1AP1	---	---	---	---	---
1:155670320|155680456	0	0	0	1.44098	0	0	0	0.480325	0.480325	0.5841	0.921644	exon	ENST00000368330,ENST00000368339,ENST00000405763,ENST00000361831,ENST00000404643,ENST00000295566,ENST00000311573,ENST00000347088,ENST00000355499,ENST00000368340,ENST00000436865,ENST00000407221,ENST00000361140	ENSG00000163374	YY1AP1	hsa_circ_0014603	1	155670320	155680456	-
1:155670320|155775173	0	0	1.80575	1.71665	0	0	0.601917	0.572217	-0.0296999	0.975893	0.990186	exon_intron	ENST00000359205,ENST00000477470,ENST00000483032,ENST00000471341,ENST00000368331,ENST00000466366,ENST00000368330,ENST00000454523,ENST00000473267,ENST00000615926,ENST00000368339,ENST00000405763,ENST00000361831,ENST00000622608,ENST00000361040,ENST00000354691,ENST00000404643,ENST00000295566,ENST00000497369,ENST00000493625,ENST00000311573,ENST00000496021,ENST00000443231,ENST00000490801,ENST00000347088…	ENSG00000163374,ENSG00000116580,ENSG00000227673	YY1AP1,GON4L,RP11-243J18.2	---	---	---	---	---
1:155670320|155777820	0	0	0	0	0	1.28966	0	0.429887	0.429887	0.635324	0.921644	exon_intron	ENST00000359205,ENST00000477470,ENST00000483032,ENST00000471341,ENST00000368331,ENST00000466366,ENST00000368330,ENST00000454523,ENST00000473267,ENST00000615926,ENST00000368339,ENST00000405763,ENST00000361831,ENST00000622608,ENST00000361040,ENST00000354691,ENST00000404643,ENST00000295566,ENST00000466224,ENST00000497369,ENST00000493625,ENST00000311573,ENST00000496021,ENST00000443231,ENST00000490801…	ENSG00000163374,ENSG00000116580,ENSG00000227673	YY1AP1,GON4L,RP11-243J18.2	---	---	---	---	---
1:155670320|155784089	3.7994	1.83985	2.93665	1.09988	0	1.95955	2.85863	1.01981	-1.83882	0.0594856	0.921644	exon_intron	ENST00000359205,ENST00000477470,ENST00000483032,ENST00000471341,ENST00000368331,ENST00000466366,ENST00000368330,ENST00000454523,ENST00000473267,ENST00000615926,ENST00000368339,ENST00000405763,ENST00000361831,ENST00000622608,ENST00000361040,ENST00000354691,ENST00000404643,ENST00000295566,ENST00000466224,ENST00000497369,ENST00000493625,ENST00000311573,ENST00000496021,ENST00000443231,ENST00000490801…	ENSG00000163374,ENSG00000116580,ENSG00000227673	YY1AP1,GON4L,RP11-243J18.2	---	---	---	---	---
1:155674685|155675096	1.38702	0	0.873449	0	0	0	0.753489	0	-0.753489	0.476856	0.921644	exon	ENST00000476027	ENSG00000163374	YY1AP1	---	---	---	---	---
1:155674685|155679512	3.95777	1.83985	2.36742	3.34297	0	0	2.72168	1.11432	-1.60736	0.567596	0.921644	exon	ENST00000476027	ENSG00000163374	YY1AP1	---	---	---	---	---
1:155675010|155676746	0	0	0	0	2.84602	0	0	0.948672	0.948672	0.330659	0.921644	exon	ENST00000359205,ENST00000466366,ENST00000368330,ENST00000454523,ENST00000368339,ENST00000405763,ENST00000361831,ENST00000354691,ENST00000404643,ENST00000295566,ENST00000493625,ENST00000311573,ENST00000443231,ENST00000347088,ENST00000355499,ENST00000368340,ENST00000476093,ENST00000436865,ENST00000476027,ENST00000407221,ENST00000361140	ENSG00000163374	YY1AP1	---	---	---	---	---
5:137985257|137988315	8.54748	8.04512	6.77036	7.00546	7.72427	7.06515	7.78766	7.26496	-0.522696	0.174756	0.921644	exon	ENST00000033079,ENST00000425075,ENST00000420893	ENSG00000031003	FAM13B	hsa_circ_0001535	5	137985257	137988315	-
1:155675010|155680008	0	0	2.11375	0	0	0	0.704583	0	-0.704583	0.413185	0.921644	exon	ENST00000361831,ENST00000443231	ENSG00000163374	YY1AP1	---	---	---	---	---
11:120474560|120477526	7.44166	7.67807	8.23537	8.10841	8.33488	8.10588	7.78503	8.18306	0.398026	0.20711	0.921644	exon	ENST00000356641,ENST00000532993,ENST00000529970,ENST00000397843	ENSG00000196914	ARHGEF12	hsa_circ_0002100	11	120474560	120477526	+
22:20933779|20934244	7.79641	7.52483	8.01643	7.91694	7.49596	7.68754	7.77922	7.70015	-0.0790717	0.62544	0.921644	exon	ENST00000354336,ENST00000411769	ENSG00000099942	CRKL	hsa_circ_0001206	22	20933779	20934244	+
1:155438327|155439068	7.69883	8.05914	7.5752	7.81442	7.63723	7.12611	7.77772	7.52592	-0.251805	0.291107	0.921644	exon	ENST00000368346,ENST00000392403	ENSG00000116539	ASH1L	hsa_circ_0000137	1	155438327	155439068	-
1:155676548|155680456	1.38702	0	0	1.71665	2.03388	2.76104	0.46234	2.17052	1.70818	0.180062	0.921644	exon	ENST00000368330,ENST00000454523,ENST00000368339,ENST00000405763,ENST00000361831,ENST00000354691,ENST00000404643,ENST00000295566,ENST00000311573,ENST00000443231,ENST00000347088,ENST00000355499,ENST00000368340,ENST00000436865,ENST00000496324,ENST00000476027,ENST00000407221,ENST00000361140	ENSG00000163374	YY1AP1	---	---	---	---	---
5:176943335|176958154	7.62991	7.64126	8.04852	7.96064	7.93964	8.28361	7.77323	8.06129	0.288066	0.295476	0.921644	exon	ENST00000377227,ENST00000503273,ENST00000506128,ENST00000512031,ENST00000511320,ENST00000510698	ENSG00000087206	UIMC1	hsa_circ_0001558	5	176943335	176958154	-
1:155679409|155777820	0	0	0.873449	0	0	0	0.29115	0	-0.29115	0.69286	0.921644	exon_intron	ENST00000359205,ENST00000483032,ENST00000471341,ENST00000368331,ENST00000466366,ENST00000368330,ENST00000454523,ENST00000473267,ENST00000615926,ENST00000368339,ENST00000405763,ENST00000361831,ENST00000622608,ENST00000361040,ENST00000354691,ENST00000404643,ENST00000295566,ENST00000466224,ENST00000497369,ENST00000493625,ENST00000311573,ENST00000496021,ENST00000443231,ENST00000490801,ENST00000347088…	ENSG00000163374,ENSG00000116580,ENSG00000227673	YY1AP1,GON4L,RP11-243J18.2	---	---	---	---	---
1:155679409|155795151	0	0	1.41363	0	0	0	0.471212	0	-0.471212	0.566201	0.921644	exon_intron	ENST00000359205,ENST00000483032,ENST00000471341,ENST00000368331,ENST00000466366,ENST00000368330,ENST00000454523,ENST00000473267,ENST00000615926,ENST00000368339,ENST00000405763,ENST00000361831,ENST00000622608,ENST00000361040,ENST00000354691,ENST00000404643,ENST00000295566,ENST00000466224,ENST00000497369,ENST00000493625,ENST00000311573,ENST00000496021,ENST00000443231,ENST00000490801,ENST00000347088…	ENSG00000163374,ENSG00000116580,ENSG00000227673	YY1AP1,GON4L,RP11-243J18.2	---	---	---	---	---
1:155709773|155726019	1.38702	0	0	0	0	2.76104	0.46234	0.920346	0.458006	0.648887	0.921644	exon	ENST00000463575,ENST00000497826,ENST00000535183,ENST00000471642,ENST00000462002,ENST00000470830,ENST00000343043,ENST00000421487,ENST00000471214,ENST00000368336	ENSG00000132676	DAP3	hsa_circ_0014609	1	155709773	155726019	+
1:155717006|155726019	2.08091	3.1275	3.08548	2.47857	0	3.6505	2.76463	2.04302	-0.721611	0.889414	0.964133	exon	ENST00000463575,ENST00000471523,ENST00000497826,ENST00000462002,ENST00000343043,ENST00000421487,ENST00000471214,ENST00000368336	ENSG00000132676	DAP3	hsa_circ_0014611	1	155717006	155726019	+
2:58198594|58232112	8.18067	7.71396	7.38003	7.4542	7.44562	7.94603	7.75822	7.61528	-0.142936	0.464496	0.921644	exon	ENST00000233741,ENST00000403295,ENST00000427708,ENST00000402135	ENSG00000115392	FANCL	hsa_circ_0004435	2	58198594	58232112	-
1:155725382|155726019	0	0	1.41363	2.14734	0	0	0.471212	0.715779	0.244567	0.779953	0.921644	exon	ENST00000463575,ENST00000471523,ENST00000535183,ENST00000471642,ENST00000462002,ENST00000470830,ENST00000479151,ENST00000343043,ENST00000421487,ENST00000471214,ENST00000368336	ENSG00000132676	DAP3	hsa_circ_0014614	1	155725382	155726019	+
1:155725382|155727738	0	0	0.873449	1.71665	0	2.41525	0.29115	1.3773	1.08615	0.365951	0.921644	exon	ENST00000463575,ENST00000535183,ENST00000471642,ENST00000470830,ENST00000479151,ENST00000343043,ENST00000421487,ENST00000471214,ENST00000368336	ENSG00000132676	DAP3	hsa_circ_0014615	1	155725382	155727738	+
1:155725382|155729366	0	0	0.873449	0.652309	0	3.03976	0.29115	1.23069	0.93954	0.313019	0.921644	exon	ENST00000535183,ENST00000471642,ENST00000479151,ENST00000343043,ENST00000421487,ENST00000471214,ENST00000368336	ENSG00000132676	DAP3	---	---	---	---	---
1:155725382|155732033	0	1.83985	0	0	0	0	0.613285	0	-0.613285	0.494453	0.921644	exon	ENST00000535183,ENST00000471642,ENST00000479151,ENST00000343043,ENST00000421487,ENST00000368336	ENSG00000132676	DAP3	---	---	---	---	---
1:155751767|155754488	0	0	0	1.09988	0	0	0	0.366626	0.366626	0.661625	0.921644	exon	ENST00000368331,ENST00000615926,ENST00000271883,ENST00000437809	ENSG00000116580	GON4L	---	---	---	---	---
1:155753204|155760641	0	0	1.41363	0	0	0	0.471212	0	-0.471212	0.566201	0.921644	exon	ENST00000368331,ENST00000615926,ENST00000271883,ENST00000437809	ENSG00000116580	GON4L	---	---	---	---	---
1:155754375|155760641	2.08091	3.1275	0	1.71665	0	1.95955	1.73614	1.2254	-0.510738	0.599716	0.921644	exon	ENST00000368331,ENST00000615926,ENST00000271883,ENST00000437809	ENSG00000116580	GON4L	---	---	---	---	---
1:155756958|155760641	2.08091	1.83985	0	0.652309	0	2.76104	1.30692	1.13778	-0.169141	0.929772	0.977227	exon	ENST00000368331,ENST00000615926,ENST00000271883,ENST00000437809	ENSG00000116580	GON4L	---	---	---	---	---
1:155760444|155762374	0	0	0	0	2.03388	0	0	0.677962	0.677962	0.50093	0.921644	exon	ENST00000368331,ENST00000615926,ENST00000271883,ENST00000437809,ENST00000620426	ENSG00000116580	GON4L	---	---	---	---	---
1:155765000|155766709	0	2.62281	0.873449	1.09988	0	0	1.16542	0.366626	-0.798793	0.495222	0.921644	exon	ENST00000471341,ENST00000368331,ENST00000615926,ENST00000622608,ENST00000361040,ENST00000271883,ENST00000437809,ENST00000620426	ENSG00000116580	GON4L	hsa_circ_0014624	1	155765000	155766709	-
1:155767425|155777820	0	0	2.58309	1.71665	0	0	0.861031	0.572217	-0.288813	0.778907	0.921644	exon	ENST00000471341,ENST00000368331,ENST00000615926,ENST00000622608,ENST00000361040,ENST00000271883,ENST00000437809,ENST00000620426	ENSG00000116580	GON4L	hsa_circ_0005621	1	155767425	155777820	-
1:155771067|155777820	0	0	0	1.09988	0	2.41525	0	1.17171	1.17171	0.280571	0.921644	exon	ENST00000471341,ENST00000368331,ENST00000615926,ENST00000622608,ENST00000361040,ENST00000271883,ENST00000437809,ENST00000620426	ENSG00000116580	GON4L	---	---	---	---	---
1:155773066|155777820	0	1.83985	2.77067	1.71665	2.84602	1.95955	1.53684	2.17407	0.637232	0.858524	0.949777	exon	ENST00000471341,ENST00000368331,ENST00000615926,ENST00000622608,ENST00000361040,ENST00000271883,ENST00000437809,ENST00000620426	ENSG00000116580	GON4L	---	---	---	---	---
1:155783986|155814449	2.54748	0	0	0	0	0	0.849161	0	-0.849161	0.345815	0.921644	exon	ENST00000471341,ENST00000368331,ENST00000615926,ENST00000622608,ENST00000361040,ENST00000271883,ENST00000437809,ENST00000620426	ENSG00000116580	GON4L	---	---	---	---	---
1:155795050|155814449	0	0	1.80575	1.44098	2.03388	0	0.601917	1.15829	0.55637	0.800717	0.931732	exon	ENST00000471341,ENST00000368331,ENST00000615926,ENST00000622608,ENST00000361040,ENST00000271883,ENST00000437809,ENST00000467009,ENST00000620426	ENSG00000116580	GON4L	hsa_circ_0014632	1	155795050	155814449	-
1:155795050|155820656	0	0	2.11375	0	0	0	0.704583	0	-0.704583	0.413185	0.921644	exon	ENST00000471341,ENST00000368331,ENST00000615926,ENST00000622608,ENST00000361040,ENST00000271883,ENST00000437809,ENST00000467009,ENST00000620426	ENSG00000116580	GON4L	---	---	---	---	---
1:155804949|155814449	0	0	0	0.652309	0	0	0	0.217436	0.217436	0.781429	0.921644	exon	ENST00000471341,ENST00000368331,ENST00000615926,ENST00000622608,ENST00000361040,ENST00000271883,ENST00000437809,ENST00000467009,ENST00000620426	ENSG00000116580	GON4L	---	---	---	---	---
1:155804949|155821548	0	1.83985	0	0	0	0	0.613285	0	-0.613285	0.494453	0.921644	exon	ENST00000471341,ENST00000368331,ENST00000615926,ENST00000622608,ENST00000361040,ENST00000271883,ENST00000437809,ENST00000620426	ENSG00000116580	GON4L	---	---	---	---	---
1:155813634|155814449	2.08091	0	0.873449	0	0	0	0.984788	0	-0.984788	0.346767	0.921644	exon	ENST00000471341,ENST00000368331,ENST00000615926,ENST00000622608,ENST00000361040,ENST00000271883,ENST00000437809,ENST00000467009,ENST00000620426	ENSG00000116580	GON4L	---	---	---	---	---
1:155820606|155827028	0	0	0	0.652309	2.03388	0	0	0.895398	0.895398	0.435432	0.921644	exon	ENST00000471341,ENST00000368331,ENST00000615926,ENST00000622608,ENST00000361040,ENST00000271883,ENST00000437809,ENST00000620426	ENSG00000116580	GON4L	---	---	---	---	---
1:155821474|155853806	0	0	0	0.652309	0	0	0	0.217436	0.217436	0.781429	0.921644	exon	ENST00000471341,ENST00000368331,ENST00000615926,ENST00000622608,ENST00000361040,ENST00000271883,ENST00000437809,ENST00000620426	ENSG00000116580	GON4L	---	---	---	---	---
1:155826837|155832950	2.08091	0	0	0	0	0	0.693638	0	-0.693638	0.429293	0.921644	exon	ENST00000468867	ENSG00000116580	GON4L	---	---	---	---	---
1:155826837|155853806	0	0	0	0.652309	2.84602	2.41525	0	1.97119	1.97119	0.0564188	0.921644	exon	ENST00000471341,ENST00000368331,ENST00000615926,ENST00000622608,ENST00000361040,ENST00000271883,ENST00000437809,ENST00000620426	ENSG00000116580	GON4L	---	---	---	---	---
1:31915895|31919658	8.15637	7.67807	7.41562	8.03799	7.36666	7.68754	7.75002	7.69739	-0.0526236	0.778311	0.921644	exon	ENST00000468531	ENSG00000184007	PTP4A2	hsa_circ_0007364	1	31915895	31919658	-
1:155867965|155868791	1.38702	0	0	2.97456	0	1.95955	0.46234	1.64471	1.18237	0.260759	0.921644	exon	ENST00000368324	ENSG00000132718	SYT11	---	---	---	---	---
1:155904311|155904804	2.08091	0	2.77067	0	3.74203	2.76104	1.6172	2.16769	0.550494	0.686399	0.921644	exon	ENST00000609492,ENST00000461050,ENST00000539040,ENST00000368323,ENST00000368322	ENSG00000143622	RIT1	hsa_circ_0006575	1	155904311	155904804	-
1:155915873|155917672	0	0	1.41363	0	0	0	0.471212	0	-0.471212	0.566201	0.921644	exon	ENST00000368321,ENST00000478002,ENST00000368320	ENSG00000132680	KIAA0907	---	---	---	---	---
1:155915873|155927156	2.54748	0	0	0	0	0	0.849161	0	-0.849161	0.345815	0.921644	exon	ENST00000368321,ENST00000368320	ENSG00000132680	KIAA0907	---	---	---	---	---
1:155921375|155921918	2.08091	0	1.80575	3.87974	3.3625	2.41525	1.29556	3.21916	1.92361	0.0555853	0.921644	exon	ENST00000368321,ENST00000478002,ENST00000368320,ENST00000483237	ENSG00000132680	KIAA0907	hsa_circ_0008998	1	155921375	155921918	-
1:155921375|155923687	0	1.83985	2.58309	2.32244	3.3625	1.28966	1.47432	2.32487	0.850551	0.578453	0.921644	exon	ENST00000368321,ENST00000478002,ENST00000368320	ENSG00000132680	KIAA0907	hsa_circ_0005758	1	155921375	155923687	-
11:46076754|46092223	7.98299	7.62249	7.52394	6.98607	7.703	7.66718	7.70981	7.45208	-0.257725	0.242372	0.921644	exon	ENST00000524497,ENST00000323180,ENST00000532883,ENST00000533757,ENST00000418153,ENST00000529782	ENSG00000135365	PHF21A	hsa_circ_0000296	11	46076754	46092223	-
1:155925632|155927156	2.54748	0	2.11375	3.8226	2.03388	0	1.55374	1.95216	0.398416	0.61696	0.921644	exon	ENST00000482337,ENST00000368321,ENST00000368319,ENST00000368320	ENSG00000132680	KIAA0907	hsa_circ_0014642	1	155925632	155927156	-
2:226864604|226867318	7.60618	7.71396	7.76925	7.32127	6.81278	7.22694	7.69647	7.12033	-0.576134	0.0169309	0.921644	exon	ENST00000392062,ENST00000341329	ENSG00000144468	RHBDD1	hsa_circ_0058493	2	226864604	226867318	+
1:155926676|155929840	0	1.83985	2.11375	1.09988	0	0	1.31787	0.366626	-0.951243	0.482013	0.921644	exon	ENST00000466713,ENST00000482337,ENST00000368321,ENST00000368319,ENST00000368320	ENSG00000132680	KIAA0907	hsa_circ_0014643	1	155926676	155929840	-
1:155927104|155933849	0	0	2.36742	0	0	0	0.789141	0	-0.789141	0.368163	0.921644	exon	ENST00000466713,ENST00000482337,ENST00000368321,ENST00000368319,ENST00000368320	ENSG00000132680	KIAA0907	---	---	---	---	---
1:155929296|155929840	0	0	0.873449	0	0	0	0.29115	0	-0.29115	0.69286	0.921644	exon	ENST00000466713,ENST00000482337,ENST00000368321,ENST00000368319,ENST00000368320	ENSG00000132680	KIAA0907	hsa_circ_0014644	1	155929296	155929840	-
1:155957713|155963183	0	0	0	0.652309	0	0	0	0.217436	0.217436	0.781429	0.921644	exon	ENST00000462460,ENST00000361247,ENST00000313667,ENST00000313695	ENSG00000116584	ARHGEF2	hsa_circ_0014651	1	155957713	155963183	-
1:156014961|156018368	0	0	0	1.09988	0	0	0	0.366626	0.366626	0.661625	0.921644	exon	ENST00000532074,ENST00000484320,ENST00000295702,ENST00000368311,ENST00000466905,ENST00000480567,ENST00000472898,ENST00000531917,ENST00000488179,ENST00000474377	ENSG00000163479	SSR2	hsa_circ_0006897	1	156014961	156018368	-
1:156135901|156137743	0	0	0	0	0	1.95955	0	0.653185	0.653185	0.485036	0.921644	exon	ENST00000498722,ENST00000448611,ENST00000473598,ENST00000368300,ENST00000368301,ENST00000368299,ENST00000361308,ENST00000368297,ENST00000496738	ENSG00000160789	LMNA	---	---	---	---	---
1:156199835|156200472	0	0	1.80575	0	0	0	0.601917	0	-0.601917	0.475406	0.921644	exon	ENST00000469537,ENST00000423538,ENST00000359511	ENSG00000160785	SLC25A44	hsa_circ_0007393	1	156199835	156200472	+
1:156225557|156233728	0	1.83985	0	0	0	0	0.613285	0	-0.613285	0.494453	0.921644	exon	ENST00000497069,ENST00000368273	ENSG00000160783	PMF1	---	---	---	---	---
1:156225557|156236483	0	0	0	1.09988	0	0	0	0.366626	0.366626	0.661625	0.921644	exon	ENST00000497069,ENST00000368273	ENSG00000160783	PMF1	---	---	---	---	---
1:156232320|156236483	0	0	0	0	2.84602	0	0	0.948672	0.948672	0.330659	0.921644	exon	ENST00000368277,ENST00000490491,ENST00000497069,ENST00000368276,ENST00000368279	ENSG00000160783,ENSG00000260238	PMF1,PMF1-BGLAP	---	---	---	---	---
1:156265781|156266678	0	0	0	0.652309	0	0	0	0.217436	0.217436	0.781429	0.921644	exon	ENST00000361813	ENSG00000198952	SMG5	---	---	---	---	---
1:156265781|156273450	2.08091	0	0	0	0	0	0.693638	0	-0.693638	0.429293	0.921644	exon	ENST00000361813	ENSG00000198952	SMG5	---	---	---	---	---
1:156265781|156274686	0	0	0	0.652309	0	0	0	0.217436	0.217436	0.781429	0.921644	exon	ENST00000361813	ENSG00000198952	SMG5	---	---	---	---	---
1:15626669|15638434	0	1.83985	0	1.09988	3.3625	0	0.613285	1.48746	0.874173	0.477146	0.921644	exon	ENST00000480945	ENSG00000197312	DDI2	---	---	---	---	---
1:15626669|15643650	2.54748	2.62281	1.41363	2.14734	2.84602	0	2.19464	1.66445	-0.530191	0.796381	0.931281	exon	ENST00000480945	ENSG00000197312	DDI2	hsa_circ_0010048	1	15626669	15643650	+
1:15626669|15651895	0	0	0	0	0	2.41525	0	0.805084	0.805084	0.395572	0.921644	exon	ENST00000480945	ENSG00000197312	DDI2	hsa_circ_0010050	1	15626669	15651895	+
1:156267470|156279034	0	0	0	1.44098	0	0	0	0.480325	0.480325	0.5841	0.921644	exon	ENST00000361813	ENSG00000198952	SMG5	---	---	---	---	---
1:156272320|156278048	0	0	1.41363	0	0	0	0.471212	0	-0.471212	0.566201	0.921644	exon	ENST00000361813	ENSG00000198952	SMG5	---	---	---	---	---
1:156277085|156279034	1.38702	0	0	0	0	0	0.46234	0	-0.46234	0.58606	0.921644	exon	ENST00000361813	ENSG00000198952	SMG5	hsa_circ_0014699	1	156277085	156279034	-
1:15630325|15643650	0	0	0.873449	2.14734	0	0	0.29115	0.715779	0.424629	0.64772	0.921644	exon	ENST00000480945	ENSG00000197312	DDI2	hsa_circ_0010051	1	15630325	15643650	+
1:15630325|15649823	0	3.1275	0	0	0	0	1.0425	0	-1.0425	0.267733	0.921644	exon	ENST00000480945	ENSG00000197312	DDI2	---	---	---	---	---
8:140846260|140890769	7.49431	7.58422	7.94516	7.75457	6.89011	7.70762	7.67456	7.45077	-0.223794	0.524629	0.921644	exon	ENST00000521791,ENST00000517887,ENST00000519993,ENST00000340930,ENST00000395218,ENST00000522684,ENST00000521059,ENST00000519419	ENSG00000169398	PTK2	hsa_circ_0003221	8	140846260	140890769	-
1:156310558|156334918	0	0	0	1.44098	0	1.95955	0	1.13351	1.13351	0.332557	0.921644	exon	ENST00000368262,ENST00000472765,ENST00000368258,ENST00000295688	ENSG00000163468	CCT3	hsa_circ_0014710	1	156310558	156334918	-
1:156317166|156317547	0	0	0	1.09988	0	0	0	0.366626	0.366626	0.661625	0.921644	exon	ENST00000368262,ENST00000472765,ENST00000368258,ENST00000368259,ENST00000295688	ENSG00000163468	CCT3	hsa_circ_0000142	1	156317166	156317547	-
1:156317166|156325089	0	0	0	0.652309	0	0	0	0.217436	0.217436	0.781429	0.921644	exon	ENST00000368262,ENST00000472765,ENST00000368258,ENST00000368259,ENST00000295688	ENSG00000163468	CCT3	---	---	---	---	---
1:156317166|156334918	0	0	0	2.32244	0	1.28966	0	1.20403	1.20403	0.275207	0.921644	exon	ENST00000368262,ENST00000472765,ENST00000368258,ENST00000295688	ENSG00000163468	CCT3	---	---	---	---	---
1:156318868|156325089	0	0	0	0.652309	0	0	0	0.217436	0.217436	0.781429	0.921644	exon	ENST00000368262,ENST00000472765,ENST00000368258,ENST00000368259,ENST00000368261,ENST00000295688	ENSG00000163468	CCT3	---	---	---	---	---
1:156318868|156333643	0	0	1.41363	0	2.03388	0	0.471212	0.677962	0.20675	0.883371	0.960332	exon	ENST00000368262,ENST00000472765,ENST00000368258,ENST00000368259,ENST00000295688	ENSG00000163468	CCT3	---	---	---	---	---
1:156320839|156325089	0	0	0.873449	0	0	0	0.29115	0	-0.29115	0.69286	0.921644	exon	ENST00000368262,ENST00000413555,ENST00000463132,ENST00000472765,ENST00000368258,ENST00000368259,ENST00000533194,ENST00000368261,ENST00000295688	ENSG00000163468	CCT3	---	---	---	---	---
9:4286038|4286523	7.82752	7.67807	7.51084	7.4209	7.03334	7.35977	7.67214	7.27134	-0.400806	0.0796066	0.921644	exon	ENST00000477901,ENST00000465708,ENST00000471664,ENST00000481827,ENST00000381971,ENST00000491889	ENSG00000107249	GLIS3	hsa_circ_0002874	9	4286038	4286523	-
1:156324972|156334918	2.08091	0	3.56273	3.25931	0	3.6505	1.88121	2.30327	0.422053	0.792188	0.929182	exon	ENST00000368262,ENST00000413555,ENST00000496684,ENST00000463132,ENST00000490221,ENST00000472765,ENST00000368258,ENST00000478640,ENST00000295688	ENSG00000163468	CCT3	hsa_circ_0005131	1	156324972	156334918	-
1:156333547|156334918	2.08091	1.83985	0	1.09988	3.74203	0	1.30692	1.61397	0.307047	0.611613	0.921644	exon	ENST00000368262,ENST00000413555,ENST00000496684,ENST00000463132,ENST00000490221,ENST00000472765,ENST00000368258,ENST00000478640,ENST00000368256,ENST00000415548,ENST00000295688	ENSG00000163468	CCT3	hsa_circ_0004680	1	156333547	156334918	-
1:15633439|15633879	0	0	2.11375	0	0	0	0.704583	0	-0.704583	0.413185	0.921644	exon	ENST00000320153,ENST00000486680	ENSG00000197312	DDI2	---	---	---	---	---
1:15633439|15643650	0	0	0	0	0	1.28966	0	0.429887	0.429887	0.635324	0.921644	exon	ENST00000320153,ENST00000483899,ENST00000480945	ENSG00000197312	DDI2	hsa_circ_0010054	1	15633439	15643650	+
12:94169153|94186473	7.51993	7.46289	7.97409	7.57158	7.59166	7.03368	7.6523	7.39897	-0.253329	0.233719	0.921644	exon	ENST00000551850,ENST00000258526,ENST00000546733	ENSG00000136040	PLXNC1	---	---	---	---	---
1:15638307|15649823	2.08091	2.62281	0	0	0	0	1.56791	0	-1.56791	0.224557	0.921644	exon	ENST00000480945	ENSG00000197312	DDI2	---	---	---	---	---
11:121045674|121060085	8.03722	7.58422	7.3212	7.58882	7.61463	7.49301	7.64755	7.56548	-0.0820632	0.54148	0.921644	exon	ENST00000531148,ENST00000529397,ENST00000284259,ENST00000533712,ENST00000422003	ENSG00000154114	TBCEL	hsa_circ_0003302	11	121045674	121060085	+
1:15643522|15651895	0	1.83985	0	1.71665	0	0	0.613285	0.572217	-0.0410675	0.993518	0.996909	exon	ENST00000320153,ENST00000480945	ENSG00000197312	DDI2	hsa_circ_0010059	1	15643522	15651895	+
1:156475108|156477202	0	1.83985	0	0	2.84602	2.41525	0.613285	1.75376	1.14047	0.46971	0.921644	exon	ENST00000464356,ENST00000348159,ENST00000360595	ENSG00000116604	MEF2D	hsa_circ_0014737	1	156475108	156477202	-
1:156482437|156483430	0	1.83985	0	0	0	0	0.613285	0	-0.613285	0.494453	0.921644	exon	ENST00000464356,ENST00000348159,ENST00000475587,ENST00000368240	ENSG00000116604	MEF2D	hsa_circ_0014741	1	156482437	156483430	-
1:15649720|15651895	2.08091	0	2.93665	0	0	3.03976	1.67252	1.01325	-0.659267	0.863723	0.952406	exon	ENST00000320153,ENST00000480945	ENSG00000197312	DDI2	hsa_circ_0004095	1	15649720	15651895	+
1:156550261|156554392	0	0	1.41363	0	0	0	0.471212	0	-0.471212	0.566201	0.921644	exon	ENST00000361170,ENST00000491900	ENSG00000183856	IQGAP3	hsa_circ_0014762	1	156550261	156554392	-
1:156782282|156787174	0	0	0	0	0	2.76104	0	0.920346	0.920346	0.321336	0.921644	exon	ENST00000491853,ENST00000271526	ENSG00000143294	PRCC	---	---	---	---	---
1:156951573|156955799	0	0	2.11375	0	0	0	0.704583	0	-0.704583	0.413185	0.921644	exon	ENST00000368194,ENST00000361409	ENSG00000132694	ARHGEF11	hsa_circ_0014815	1	156951573	156955799	-
1:156951573|156956564	2.89947	0	0	0.652309	0	1.95955	0.966489	0.870621	-0.095868	0.726915	0.921644	exon	ENST00000368194,ENST00000361409	ENSG00000132694	ARHGEF11	hsa_circ_0014816	1	156951573	156956564	-
1:156951573|156963594	0	0	1.41363	0	0	0	0.471212	0	-0.471212	0.566201	0.921644	exon	ENST00000368194,ENST00000361409	ENSG00000132694	ARHGEF11	---	---	---	---	---
1:156963203|156977054	0	0	0	0	0	2.41525	0	0.805084	0.805084	0.395572	0.921644	exon	ENST00000368194,ENST00000361409	ENSG00000132694	ARHGEF11	---	---	---	---	---
1:156976983|156986173	1.38702	0	2.36742	0.652309	0	0	1.25148	0.217436	-1.03404	0.370034	0.921644	exon	ENST00000368194,ENST00000361409	ENSG00000132694	ARHGEF11	hsa_circ_0014824	1	156976983	156986173	-
1:156978204|156986173	0	0	2.58309	0	0	0	0.861031	0	-0.861031	0.328374	0.921644	exon	ENST00000368194,ENST00000361409	ENSG00000132694	ARHGEF11	---	---	---	---	---
1:15717893|15719920	0	0	0	1.09988	0	0	0	0.366626	0.366626	0.661625	0.921644	exon	ENST00000375799,ENST00000375793	ENSG00000116786	PLEKHM2	hsa_circ_0010064	1	15717893	15719920	+
7:33146242|33177591	7.42819	7.97289	7.4572	7.68012	7.82616	7.45787	7.61943	7.65472	0.0352893	0.950166	0.983054	exon	ENST00000350941,ENST00000433714,ENST00000242067,ENST00000396127,ENST00000355070	ENSG00000122507	BBS9	hsa_circ_0003162	7	33146242	33177591	+
1:15717893|15725545	0	0	0	1.44098	0	0	0	0.480325	0.480325	0.5841	0.921644	exon	ENST00000375799,ENST00000375793	ENSG00000116786	PLEKHM2	---	---	---	---	---
1:15719734|15721388	1.38702	0	2.11375	2.61944	2.03388	1.28966	1.16692	1.981	0.814074	0.612986	0.921644	exon	ENST00000375799	ENSG00000116786	PLEKHM2	hsa_circ_0002733	1	15719734	15721388	+
1:15727014|15728357	0	0	0	0	0	1.95955	0	0.653185	0.653185	0.485036	0.921644	exon	ENST00000375799,ENST00000375793	ENSG00000116786	PLEKHM2	---	---	---	---	---
1:15764493|15765233	0	0	0	1.09988	0	0	0	0.366626	0.366626	0.661625	0.921644	exon	ENST00000431771,ENST00000375771	ENSG00000162458	FBLIM1	---	---	---	---	---
1:15764496|15765233	0	0	0.873449	0	0	0	0.29115	0	-0.29115	0.69286	0.921644	exon	ENST00000375766,ENST00000431771,ENST00000375771,ENST00000502739,ENST00000483633	ENSG00000162458	FBLIM1	---	---	---	---	---
1:15767376|15768630	0	0	1.80575	1.71665	0	0	0.601917	0.572217	-0.0296999	0.975893	0.990186	exon	ENST00000375766,ENST00000441801,ENST00000375771	ENSG00000162458	FBLIM1	hsa_circ_0010095	1	15767376	15768630	+
1:15767376|15774796	0	0	0.873449	1.44098	0	0	0.29115	0.480325	0.189176	0.841921	0.941209	exon	ENST00000375766,ENST00000441801,ENST00000375771	ENSG00000162458	FBLIM1	hsa_circ_0010096	1	15767376	15774796	+
1:15768528|15774796	0	0	0.873449	1.09988	0	0	0.29115	0.366626	0.0754759	0.929396	0.977053	exon	ENST00000375766,ENST00000441801,ENST00000375771	ENSG00000162458	FBLIM1	hsa_circ_0010098	1	15768528	15774796	+
1:157698384|157700585	0	0	0	0	0	1.28966	0	0.429887	0.429887	0.635324	0.921644	exon	ENST00000477837,ENST00000485028,ENST00000480682,ENST00000368184,ENST00000492769,ENST00000494724,ENST00000496769,ENST00000368186	ENSG00000160856	FCRL3	---	---	---	---	---
1:158084422|158088454	0	1.83985	1.80575	1.09988	0	1.95955	1.2152	1.01981	-0.195392	0.89954	0.968118	exon	ENST00000359209,ENST00000368173	ENSG00000183853	KIRREL	---	---	---	---	---
1:158084422|158091556	0	0	0.873449	0	0	0	0.29115	0	-0.29115	0.69286	0.921644	exon	ENST00000359209,ENST00000368173	ENSG00000183853	KIRREL	hsa_circ_0014832	1	158084422	158091556	+
1:15872816|15876678	3.4185	0	2.11375	2.86562	2.03388	0	1.84408	1.63317	-0.210913	0.792511	0.929463	exon	ENST00000375759	ENSG00000065526	SPEN	hsa_circ_0002237	1	15872816	15876678	+
1:15872816|15922349	0	1.83985	0	0	0	0	0.613285	0	-0.613285	0.494453	0.921644	exon	ENST00000375759	ENSG00000065526	SPEN	---	---	---	---	---
1:15876202|15876678	0	0	0	0.652309	0	0	0	0.217436	0.217436	0.781429	0.921644	exon	ENST00000438066,ENST00000375759,ENST00000471538	ENSG00000065526	SPEN	hsa_circ_0010107	1	15876202	15876678	+
1:15909321|15911301	0	1.83985	2.11375	2.61944	0	0	1.31787	0.873148	-0.44472	0.965564	0.986722	exon	ENST00000438066,ENST00000375759	ENSG00000065526	SPEN	hsa_circ_0010109	1	15909321	15911301	+
1:15909321|15916279	2.89947	1.83985	2.77067	0	2.03388	3.03976	2.50333	1.69121	-0.812117	0.639882	0.921644	exon	ENST00000375759	ENSG00000065526	SPEN	hsa_circ_0010110	1	15909321	15916279	+
1:15909321|15920983	0	0	0	1.71665	0	2.76104	0	1.49256	1.49256	0.150146	0.921644	exon	ENST00000375759	ENSG00000065526	SPEN	hsa_circ_0010111	1	15909321	15920983	+
1:15909321|15922349	1.38702	0	0	1.44098	0	3.03976	0.46234	1.49358	1.03124	0.316863	0.921644	exon	ENST00000375759	ENSG00000065526	SPEN	hsa_circ_0010112	1	15909321	15922349	+
1:15911101|15916279	3.1822	1.83985	0	1.71665	2.84602	2.76104	1.67402	2.44124	0.767218	0.789541	0.927343	exon	ENST00000375759,ENST00000442985	ENSG00000065526	SPEN	hsa_circ_0010113	1	15911101	15916279	+
1:15911101|15922349	0	0	1.41363	0.652309	0	1.28966	0.471212	0.647324	0.176112	0.958459	0.983054	exon	ENST00000375759	ENSG00000065526	SPEN	---	---	---	---	---
1:15916128|15922349	2.54748	1.83985	0	1.09988	0	3.6505	1.46245	1.58346	0.121012	0.703417	0.921644	exon	ENST00000375759	ENSG00000065526	SPEN	---	---	---	---	---
1:15918926|15922349	0	0	0	0	2.03388	0	0	0.677962	0.677962	0.50093	0.921644	exon	ENST00000375759	ENSG00000065526	SPEN	---	---	---	---	---
1:59321536|59346398	7.68757	7.97289	7.08523	7.32127	8.32099	7.84993	7.5819	7.83073	0.248831	0.556551	0.921644	exon	ENST00000430447,ENST00000495718,ENST00000413489,ENST00000303721,ENST00000634364,ENST00000371218	ENSG00000172456	FGGY	hsa_circ_0000075	1	59321536	59346398	+
1:15944300|15946294	2.08091	0	0.873449	0	0	0	0.984788	0	-0.984788	0.346767	0.921644	exon	ENST00000375743,ENST00000375733,ENST00000537142	ENSG00000116809	ZBTB17	---	---	---	---	---
1:15945715|15946294	0	0	0	0	3.3625	0	0	1.12083	1.12083	0.271092	0.921644	exon	ENST00000375743,ENST00000375733,ENST00000537142,ENST00000490899	ENSG00000116809	ZBTB17	---	---	---	---	---
1:159918838|159920537	0	0	2.11375	0.652309	0	0	0.704583	0.217436	-0.487147	0.606858	0.921644	exon	ENST00000368096,ENST00000478033,ENST00000368097,ENST00000320307,ENST00000397334	ENSG00000158710	TAGLN2	---	---	---	---	---
1:160123213|160125253	0	1.83985	0	0	0	0	0.613285	0	-0.613285	0.494453	0.921644	exon	ENST00000392233,ENST00000472488,ENST00000361216	ENSG00000018625	ATP1A2	---	---	---	---	---
1:160231297|160240370	0	0	0	2.14734	0	1.95955	0	1.36896	1.36896	0.225136	0.921644	exon	ENST00000368074,ENST00000368073,ENST00000326837,ENST00000461888,ENST00000556710	ENSG00000132716,ENSG00000258465	DCAF8,RP11-574F21.3	hsa_circ_0014876	1	160231297	160240370	-
1:160237135|160240370	0	0	0	1.09988	0	0	0	0.366626	0.366626	0.661625	0.921644	exon	ENST00000368074,ENST00000368073,ENST00000326837,ENST00000461888,ENST00000556710	ENSG00000132716,ENSG00000258465	DCAF8,RP11-574F21.3	hsa_circ_0014877	1	160237135	160240370	-
1:160237135|160244034	1.38702	0	0	1.09988	0	0	0.46234	0.366626	-0.0957141	0.951077	0.983054	exon	ENST00000368074,ENST00000368073,ENST00000326837,ENST00000461888,ENST00000556710	ENSG00000132716,ENSG00000258465	DCAF8,RP11-574F21.3	hsa_circ_0014878	1	160237135	160244034	-
1:160294768|160305773	0	0	0.873449	0	0	0	0.29115	0	-0.29115	0.69286	0.921644	exon	ENST00000368069,ENST00000241704	ENSG00000122218	COPA	---	---	---	---	---
1:160298845|160332557	0	0	0.873449	0	0	0	0.29115	0	-0.29115	0.69286	0.921644	exon	ENST00000368069,ENST00000241704	ENSG00000122218	COPA	---	---	---	---	---
1:160299102|160309176	0	1.83985	0	0	0	0	0.613285	0	-0.613285	0.494453	0.921644	exon	ENST00000368069,ENST00000241704	ENSG00000122218	COPA	---	---	---	---	---
1:160305433|160314125	0	1.83985	0.873449	1.09988	0	0	0.904434	0.366626	-0.537809	0.718118	0.921644	exon	ENST00000368069,ENST00000241704	ENSG00000122218	COPA	hsa_circ_0014905	1	160305433	160314125	-
1:160305433|160332557	0	0	0	1.44098	0	0	0	0.480325	0.480325	0.5841	0.921644	exon	ENST00000368069,ENST00000241704	ENSG00000122218	COPA	hsa_circ_0014907	1	160305433	160332557	-
1:160309101|160332557	0	0	0.873449	0	0	0	0.29115	0	-0.29115	0.69286	0.921644	exon	ENST00000368069,ENST00000241704	ENSG00000122218	COPA	---	---	---	---	---
1:160311868|160313167	0	0	0	1.09988	2.84602	0	0	1.3153	1.3153	0.21324	0.921644	exon	ENST00000368069,ENST00000241704	ENSG00000122218	COPA	hsa_circ_0014923	1	160311868	160313167	-
1:160311868|160323530	0	0	0	1.09988	0	0	0	0.366626	0.366626	0.661625	0.921644	exon	ENST00000368069,ENST00000241704	ENSG00000122218	COPA	hsa_circ_0014925	1	160311868	160323530	-
1:160311868|160332557	1.38702	0	0	0	0	0	0.46234	0	-0.46234	0.58606	0.921644	exon	ENST00000368069,ENST00000241704	ENSG00000122218	COPA	hsa_circ_0014926	1	160311868	160332557	-
1:160313085|160340294	0	0	0.873449	0	0	0	0.29115	0	-0.29115	0.69286	0.921644	exon	ENST00000368069,ENST00000241704	ENSG00000122218	COPA	---	---	---	---	---
1:160313990|160325652	0	0	0	1.44098	0	0	0	0.480325	0.480325	0.5841	0.921644	exon	ENST00000368069,ENST00000241704	ENSG00000122218	COPA	hsa_circ_0014930	1	160313990	160325652	-
1:160313990|160335322	0	0	1.41363	0	0	0	0.471212	0	-0.471212	0.566201	0.921644	exon	ENST00000368069,ENST00000241704	ENSG00000122218	COPA	---	---	---	---	---
1:160317354|160332557	0	0	1.41363	2.32244	2.84602	1.28966	0.471212	2.15271	1.68149	0.215099	0.921644	exon_intron	ENST00000368069,ENST00000241704,ENST00000365208	ENSG00000122218,ENSG00000202078	COPA,Y_RNA	---	---	---	---	---
1:243545510|243573048	7.91702	6.93366	7.88549	7.68413	8.02782	7.62557	7.57873	7.77917	0.200448	0.769426	0.921644	exon	ENST00000366539,ENST00000366540,ENST00000336199,ENST00000263826	ENSG00000117020	AKT3	hsa_circ_0000199	1	243545510	243573048	-
1:160323431|160339982	0	0	1.80575	0	0	0	0.601917	0	-0.601917	0.475406	0.921644	exon	ENST00000368069,ENST00000241704	ENSG00000122218	COPA	---	---	---	---	---
1:160325543|160335322	0	0	2.36742	1.44098	0	0	0.789141	0.480325	-0.308816	0.729022	0.921644	exon	ENST00000368069,ENST00000241704	ENSG00000122218	COPA	---	---	---	---	---
1:160348999|160350250	0	1.83985	0	0.652309	0	0	0.613285	0.217436	-0.395848	0.717705	0.921644	exon	ENST00000438008,ENST00000294785,ENST00000368063,ENST00000421914	ENSG00000162736	NCSTN	hsa_circ_0014938	1	160348999	160350250	+
1:160415648|160421187	1.38702	2.62281	0	0	0	0	1.33661	0	-1.33661	0.200534	0.921644	exon	ENST00000368061	ENSG00000162738	VANGL2	---	---	---	---	---
1:160838451|160841901	0	1.83985	0	0	0	0	0.613285	0	-0.613285	0.494453	0.921644	exon	ENST00000322302,ENST00000368033,ENST00000492063,ENST00000368034	ENSG00000122223	CD244	---	---	---	---	---
1:161102048|161102375	2.89947	0	0	0.652309	0	0	0.966489	0.217436	-0.749053	0.469342	0.921644	exon	ENST00000368010	ENSG00000143256	PFDN2	hsa_circ_0000145	1	161102048	161102375	-
1:161168993|161170024	2.08091	0	2.11375	1.09988	2.84602	3.03976	1.39822	2.32855	0.930329	0.49677	0.921644	exon	ENST00000352210,ENST00000495483,ENST00000367999	ENSG00000143224	PPOX	hsa_circ_0014982	1	161168993	161170024	+
1:161176605|161177422	0	0	0	0.652309	0	0	0	0.217436	0.217436	0.781429	0.921644	exon_intron	ENST00000470882,ENST00000487004,ENST00000460415,ENST00000467863,ENST00000482288,ENST00000496313	ENSG00000158850	B4GALT3	---	---	---	---	---
1:16137853|16138430	0	0	0	0	0	1.28966	0	0.429887	0.429887	0.635324	0.921644	exon	ENST00000480202,ENST00000358432	ENSG00000142627	EPHA2	hsa_circ_0005240	1	16137853	16138430	-
1:161751655|161752464	0	1.83985	0	0	0	2.41525	0.613285	0.805084	0.191799	0.796495	0.931281	exon	ENST00000464004,ENST00000484291	ENSG00000081721	DUSP12	---	---	---	---	---
1:161751668|161753261	0	0	0	0	0	2.41525	0	0.805084	0.805084	0.395572	0.921644	exon	ENST00000367943,ENST00000484291	ENSG00000081721	DUSP12	---	---	---	---	---
1:161751866|161753261	0	1.83985	0	0	0	0	0.613285	0	-0.613285	0.494453	0.921644	exon	ENST00000367943	ENSG00000081721	DUSP12	---	---	---	---	---
1:161778244|161784096	2.08091	3.50067	1.80575	3.42204	0	3.03976	2.46245	2.15393	-0.308511	0.836302	0.941209	exon	ENST00000367942	ENSG00000118217	ATF6	hsa_circ_0003039	1	161778244	161784096	+
1:161778244|161792327	0	0	0	0.652309	0	0	0	0.217436	0.217436	0.781429	0.921644	exon	ENST00000367942	ENSG00000118217	ATF6	---	---	---	---	---
1:161778244|161802272	2.89947	3.1275	0.873449	1.09988	0	0	2.30014	0.366626	-1.93351	0.0807404	0.921644	exon	ENST00000367942	ENSG00000118217	ATF6	hsa_circ_0007360	1	161778244	161802272	+
1:161778244|161821161	0	0	0	1.09988	0	1.28966	0	0.796513	0.796513	0.490408	0.921644	exon	ENST00000367942	ENSG00000118217	ATF6	---	---	---	---	---
1:161791408|161792327	0	0	2.36742	0	0	0	0.789141	0	-0.789141	0.368163	0.921644	exon	ENST00000367942	ENSG00000118217	ATF6	hsa_circ_0015022	1	161791408	161792327	+
1:161791408|161802272	1.38702	0	0	0	0	0	0.46234	0	-0.46234	0.58606	0.921644	exon	ENST00000367942	ENSG00000118217	ATF6	---	---	---	---	---
1:161802052|161821161	1.38702	0	2.58309	2.32244	0	3.27325	1.32337	1.86523	0.541861	0.589152	0.921644	exon	ENST00000367942	ENSG00000118217	ATF6	hsa_circ_0015027	1	161802052	161821161	+
1:161819633|161853323	1.38702	0	0	0	0	0	0.46234	0	-0.46234	0.58606	0.921644	exon	ENST00000367942	ENSG00000118217	ATF6	---	---	---	---	---
1:161821070|161863312	2.08091	0	1.41363	0	0	0	1.16485	0	-1.16485	0.287638	0.921644	exon	ENST00000367942	ENSG00000118217	ATF6	---	---	---	---	---
1:161821070|161912380	0	0	0	0	0	1.28966	0	0.429887	0.429887	0.635324	0.921644	exon	ENST00000367942	ENSG00000118217	ATF6	---	---	---	---	---
1:161846449|161853323	0	0	0	1.09988	0	0	0	0.366626	0.366626	0.661625	0.921644	exon	ENST00000367942,ENST00000476437	ENSG00000118217	ATF6	---	---	---	---	---
18:21765772|21779685	7.40087	7.76618	7.5498	7.77354	7.72427	7.56081	7.57228	7.68621	0.113921	0.729904	0.921644	exon	ENST00000261537,ENST00000578646	ENSG00000101752	MIB1	hsa_circ_0000835	18	21765772	21779685	+
6:7176655|7189322	7.66478	7.52483	7.50424	7.38681	7.28312	7.38493	7.56462	7.35162	-0.213	0.265924	0.921644	exon	ENST00000379938,ENST00000334984,ENST00000475946,ENST00000379933,ENST00000471433,ENST00000349384,ENST00000483150	ENSG00000124782	RREB1	hsa_circ_0001573	6	7176655	7189322	+
1:161851722|161912380	1.38702	1.83985	0	2.74778	0	2.41525	1.07562	1.72101	0.645386	0.450389	0.921644	exon	ENST00000367942	ENSG00000118217	ATF6	---	---	---	---	---
1:161997825|162020182	0	0	0	0	2.84602	0	0	0.948672	0.948672	0.330659	0.921644	exon	ENST00000294794,ENST00000367940	ENSG00000162745	OLFML2B	---	---	---	---	---
1:16201782|16202574	3.1822	4.25234	0	1.09988	4.50242	5.15676	2.47818	3.58635	1.10817	0.548936	0.921644	exon	ENST00000270747	ENSG00000142632	ARHGEF19	hsa_circ_0003567	1	16201782	16202574	-
1:162499955|162501104	0	0	0	1.71665	0	0	0	0.572217	0.572217	0.523576	0.921644	exon	ENST00000282169,ENST00000489294,ENST00000538489,ENST00000545294	ENSG00000152332	UHMK1	hsa_circ_0015039	1	162499955	162501104	+
1:162499955|162503848	1.38702	0	0	0.652309	0	0	0.46234	0.217436	-0.244903	0.824865	0.938733	exon	ENST00000282169,ENST00000489294,ENST00000538489,ENST00000545294	ENSG00000152332	UHMK1	hsa_circ_0015040	1	162499955	162503848	+
1:162499955|162512823	0	0	0	0	0	2.76104	0	0.920346	0.920346	0.321336	0.921644	exon	ENST00000282169,ENST00000489294,ENST00000538489,ENST00000545294	ENSG00000152332	UHMK1	---	---	---	---	---
1:162499955|162518190	0	1.83985	0	0	0	1.28966	0.613285	0.429887	-0.183397	0.868635	0.953201	exon	ENST00000282169,ENST00000489294,ENST00000545294	ENSG00000152332	UHMK1	hsa_circ_0015041	1	162499955	162518190	+
1:162503754|162518190	0	0	1.41363	0	0	0	0.471212	0	-0.471212	0.566201	0.921644	exon	ENST00000282169,ENST00000489294,ENST00000545294	ENSG00000152332	UHMK1	hsa_circ_0015044	1	162503754	162518190	+
1:16255711|16305919	0	0	0	0	2.84602	0	0	0.948672	0.948672	0.330659	0.921644	exon	ENST00000375592	ENSG00000037637	FBXO42	---	---	---	---	---
1:162566012|162566348	0	0	0.873449	0	0	0	0.29115	0	-0.29115	0.69286	0.921644	exon	ENST00000271469,ENST00000367926	ENSG00000117143	UAP1	---	---	---	---	---
1:162566012|162588833	1.38702	0	0	0	0	0	0.46234	0	-0.46234	0.58606	0.921644	exon	ENST00000271469,ENST00000367926	ENSG00000117143	UAP1	---	---	---	---	---
1:162566012|162597858	0	0	0	0	0	2.41525	0	0.805084	0.805084	0.395572	0.921644	exon	ENST00000271469,ENST00000367926	ENSG00000117143	UAP1	---	---	---	---	---
1:162576777|162581459	0	0	2.11375	1.09988	0	0	0.704583	0.366626	-0.337958	0.722448	0.921644	exon	ENST00000367924,ENST00000271469,ENST00000367925,ENST00000367926	ENSG00000117143	UAP1	---	---	---	---	---
1:162576777|162597858	2.08091	0	0	0	2.84602	1.28966	0.693638	1.37856	0.684921	0.668852	0.921644	exon	ENST00000367924,ENST00000271469,ENST00000367925,ENST00000367926	ENSG00000117143	UAP1	hsa_circ_0004646	1	162576777	162597858	+
1:162587475|162588833	2.08091	0	0	0	0	0	0.693638	0	-0.693638	0.429293	0.921644	exon	ENST00000367924,ENST00000271469,ENST00000367925,ENST00000367926	ENSG00000117143	UAP1	---	---	---	---	---
1:162587475|162592782	1.38702	0	0	0	0	0	0.46234	0	-0.46234	0.58606	0.921644	exon	ENST00000367924,ENST00000271469,ENST00000367925	ENSG00000117143	UAP1	---	---	---	---	---
1:162587475|162597858	0	0	0	0	0	1.28966	0	0.429887	0.429887	0.635324	0.921644	exon	ENST00000367924,ENST00000271469,ENST00000367925,ENST00000367926	ENSG00000117143	UAP1	---	---	---	---	---
1:162753198|162754580	0	0	1.41363	0	0	0	0.471212	0	-0.471212	0.566201	0.921644	intron	ENST00000367922,ENST00000367921,ENST00000446985,ENST00000415555	ENSG00000162733	DDR2	---	---	---	---	---
1:16294783|16305919	0	0	0	0	3.74203	0	0	1.24734	1.24734	0.226265	0.921644	exon	ENST00000478089,ENST00000375592	ENSG00000037637	FBXO42	hsa_circ_0010143	1	16294783	16305919	-
1:16294783|16315435	0	0	2.77067	1.94801	2.03388	0	0.923558	1.3273	0.403739	0.957263	0.983054	exon	ENST00000375592	ENSG00000037637	FBXO42	hsa_circ_0010144	1	16294783	16315435	-
1:16294783|16316568	0	1.83985	0	0	0	0	0.613285	0	-0.613285	0.494453	0.921644	exon_intron	ENST00000478089,ENST00000375592	ENSG00000037637	FBXO42	---	---	---	---	---
1:16305803|16315435	2.54748	0	1.80575	2.61944	0	2.41525	1.45108	1.67823	0.227154	0.81447	0.9362	exon	ENST00000375592	ENSG00000037637	FBXO42	hsa_circ_0010146	1	16305803	16315435	-
1:163152538|163168368	0	0	0	0	0	2.76104	0	0.920346	0.920346	0.321336	0.921644	exon	ENST00000530507,ENST00000525894	ENSG00000143248	RGS5	---	---	---	---	---
1:16391375|16393482	0	0	2.11375	0	0	0	0.704583	0	-0.704583	0.413185	0.921644	exon	ENST00000486763,ENST00000472351,ENST00000471507,ENST00000472461,ENST00000401088,ENST00000475554	ENSG00000055070	SZRD1	---	---	---	---	---
1:16447870|16452015	0	0	0	1.94801	0	0	0	0.649335	0.649335	0.47295	0.921644	exon	ENST00000504551,ENST00000504858,ENST00000492095,ENST00000457722,ENST00000496239,ENST00000443980,ENST00000459640,ENST00000337132	ENSG00000157191	NECAP2	---	---	---	---	---
1:16451838|16455893	0	1.83985	0	0	0	0	0.613285	0	-0.613285	0.494453	0.921644	exon	ENST00000504551,ENST00000492095,ENST00000513161,ENST00000457722,ENST00000496239,ENST00000459640,ENST00000337132	ENSG00000157191	NECAP2	---	---	---	---	---
1:16475825|16478437	0	0	0	0.652309	0	0	0	0.217436	0.217436	0.781429	0.921644	exon	ENST00000591348,ENST00000263511	ENSG00000080947	CROCCP3	---	---	---	---	---
1:16475825|16490926	0	0	0	0	0	2.41525	0	0.805084	0.805084	0.395572	0.921644	exon	ENST00000591348,ENST00000263511	ENSG00000080947	CROCCP3	---	---	---	---	---
1:164792494|164799889	0	0	0	1.09988	0	0	0	0.366626	0.366626	0.661625	0.921644	exon	ENST00000560641,ENST00000558837,ENST00000559240,ENST00000468104,ENST00000612123,ENST00000482110,ENST00000560469,ENST00000540236,ENST00000367897,ENST00000627490,ENST00000420696,ENST00000496120	ENSG00000185630	PBX1	---	---	---	---	---
1:164792494|164812149	0	0	0	0	0	1.28966	0	0.429887	0.429887	0.635324	0.921644	exon	ENST00000560641,ENST00000468104,ENST00000612123,ENST00000560469,ENST00000540236,ENST00000367897,ENST00000627490,ENST00000420696,ENST00000496120	ENSG00000185630	PBX1	---	---	---	---	---
1:164792494|164821626	2.08091	0	0	3.17049	2.03388	0	0.693638	1.73479	1.04115	0.518138	0.921644	exon	ENST00000560641,ENST00000559240,ENST00000468104,ENST00000612123,ENST00000560469,ENST00000540236,ENST00000367897,ENST00000627490,ENST00000420696,ENST00000496120	ENSG00000185630	PBX1	---	---	---	---	---
1:164807542|164821626	1.38702	3.1275	1.41363	3.76309	0	2.76104	1.97605	2.17471	0.198658	0.463342	0.921644	exon	ENST00000560641,ENST00000559240,ENST00000468104,ENST00000612123,ENST00000560469,ENST00000540236,ENST00000367897,ENST00000627490,ENST00000420696,ENST00000496120	ENSG00000185630	PBX1	hsa_circ_0015068	1	164807542	164821626	+
1:16483287|16490926	0	0	0	0	0	1.95955	0	0.653185	0.653185	0.485036	0.921644	exon	ENST00000591348,ENST00000263511,ENST00000420820	ENSG00000080947	CROCCP3	---	---	---	---	---
1:1655369|1657498	1.38702	0	0	0	0	0	0.46234	0	-0.46234	0.58606	0.921644	exon	ENST00000611150,ENST00000615951,ENST00000629312,ENST00000407249,ENST00000340677,ENST00000341028,ENST00000626918,ENST00000629289,ENST00000341832	ENSG00000248333	CDK11B	---	---	---	---	---
1:16564807|16565805	0	0	0	0.652309	0	0	0	0.217436	0.217436	0.781429	0.921644	exon	ENST00000430580,ENST00000432949	ENSG00000219481	NBPF1	---	---	---	---	---
1:16564807|16567351	0	1.83985	0	2.61944	2.84602	0	0.613285	1.82182	1.20854	0.39885	0.921644	exon	ENST00000430580,ENST00000432949	ENSG00000219481	NBPF1	---	---	---	---	---
1:165649841|165654351	2.08091	0	0	0	0	0	0.693638	0	-0.693638	0.429293	0.921644	exon	ENST00000367889,ENST00000367884,ENST00000367888,ENST00000495447,ENST00000367885,ENST00000367883,ENST00000627653	ENSG00000143198	MGST3	---	---	---	---	---
1:165667309|165695397	0	0	0.873449	0	0	0	0.29115	0	-0.29115	0.69286	0.921644	exon	ENST00000354775	ENSG00000143149	ALDH9A1	---	---	---	---	---
1:165668926|165680683	0	1.83985	0.873449	1.71665	0	1.95955	0.904434	1.2254	0.320968	0.765128	0.921644	exon	ENST00000354775	ENSG00000143149	ALDH9A1	hsa_circ_0015072	1	165668926	165680683	-
1:165668926|165695397	1.38702	0	0	0	0	0	0.46234	0	-0.46234	0.58606	0.921644	exon	ENST00000354775	ENSG00000143149	ALDH9A1	---	---	---	---	---
1:165679442|165683110	2.54748	0	2.11375	3.93471	0	2.76104	1.55374	2.23192	0.678171	0.440581	0.921644	exon	ENST00000354775	ENSG00000143149	ALDH9A1	hsa_circ_0005666	1	165679442	165683110	-
1:165679442|165695397	1.38702	0	0	0.652309	0	0	0.46234	0.217436	-0.244903	0.824865	0.938733	exon	ENST00000354775	ENSG00000143149	ALDH9A1	hsa_circ_0003014	1	165679442	165695397	-
1:165680487|165695397	0	0	0	0.652309	0	1.95955	0	0.870621	0.870621	0.421048	0.921644	exon	ENST00000461664,ENST00000354775	ENSG00000143149	ALDH9A1	---	---	---	---	---
1:16573142|16575229	0	0	1.80575	0	0	0	0.601917	0	-0.601917	0.475406	0.921644	exon	ENST00000430580,ENST00000432949,ENST00000392963	ENSG00000219481	NBPF1	---	---	---	---	---
1:165743167|165754274	0	0	0	2.32244	0	0	0	0.774146	0.774146	0.40131	0.921644	exon	ENST00000476143,ENST00000580248,ENST00000612311,ENST00000464650,ENST00000392129,ENST00000367881	ENSG00000143183	TMCO1	hsa_circ_0015077	1	165743167	165754274	-
1:165743167|165759584	1.38702	0	0	0	0	0	0.46234	0	-0.46234	0.58606	0.921644	exon	ENST00000580248,ENST00000612311,ENST00000464650,ENST00000392129,ENST00000367881	ENSG00000143183	TMCO1	---	---	---	---	---
1:165890204|165891322	1.38702	0	2.58309	1.94801	2.84602	1.28966	1.32337	2.02789	0.704525	0.77985	0.921644	exon	ENST00000367879	ENSG00000143179	UCK2	hsa_circ_0006758	1	165890204	165891322	+
11:18291442|18292976	8.01937	7.74899	6.89663	8.47347	7.61463	7.48139	7.55499	7.8565	0.301502	0.549744	0.921644	exon	ENST00000438420,ENST00000396253,ENST00000349215	ENSG00000110756	HPS5	hsa_circ_0000280	11	18291442	18292976	-
1:165890204|165903279	0	0	0	0.652309	0	0	0	0.217436	0.217436	0.781429	0.921644	exon	ENST00000367879	ENSG00000143179	UCK2	hsa_circ_0015081	1	165890204	165903279	+
1:165890204|165905969	1.38702	0	0	0	0	0	0.46234	0	-0.46234	0.58606	0.921644	exon	ENST00000367879	ENSG00000143179	UCK2	hsa_circ_0015082	1	165890204	165905969	+
1:16625775|16643145	0	0	0	0.652309	0	0	0	0.217436	0.217436	0.781429	0.921644	exon	ENST00000635081	ENSG00000215908	CROCCP2	---	---	---	---	---
1:16633095|16635168	2.89947	0	0	1.44098	4.50242	3.03976	0.966489	2.99439	2.0279	0.29683	0.921644	exon_intron	ENST00000635081,ENST00000362058,ENST00000412962	ENSG00000215908	CROCCP2	---	---	---	---	---
1:1668327|1670151	0	1.83985	0	0	0	0	0.613285	0	-0.613285	0.494453	0.921644	exon	ENST00000617444,ENST00000611123	ENSG00000189339	SLC35E2B	hsa_circ_0009303	1	1668327	1670151	-
1:1668327|1739704	0	0	0	0.652309	0	0	0	0.217436	0.217436	0.781429	0.921644	exon_intron	ENST00000487462,ENST00000614300,ENST00000404249,ENST00000468397,ENST00000401096,ENST00000468800,ENST00000479362,ENST00000358779,ENST00000598846,ENST00000498810,ENST00000463652,ENST00000357760,ENST00000378633,ENST00000509982,ENST00000492390,ENST00000495016,ENST00000356937,ENST00000464748,ENST00000246421,ENST00000617444,ENST00000356200,ENST00000481276,ENST00000489300,ENST00000355439,ENST00000480991…	ENSG00000008128,ENSG00000189339,ENSG00000268575,ENSG00000215790	CDK11A,SLC35E2B,RP1-283E3.8,SLC35E2	---	---	---	---	---
1:166862203|166863921	0	2.62281	2.58309	2.14734	2.03388	1.95955	1.7353	2.04693	0.311625	0.923764	0.977053	exon	ENST00000367874	ENSG00000152382	TADA1	---	---	---	---	---
1:166862203|166869854	0	0	1.80575	0	2.03388	0	0.601917	0.677962	0.0760444	0.998145	0.999119	exon	ENST00000367874	ENSG00000152382	TADA1	---	---	---	---	---
1:1669664|1670151	1.38702	0	1.41363	1.71665	0	0	0.933551	0.572217	-0.361334	0.888781	0.963685	exon	ENST00000617444,ENST00000611123	ENSG00000189339	SLC35E2B	hsa_circ_0006454	1	1669664	1670151	-
1:1669664|1734835	0	0	0.873449	0	0	0	0.29115	0	-0.29115	0.69286	0.921644	exon_intron	ENST00000487462,ENST00000614300,ENST00000404249,ENST00000468397,ENST00000401096,ENST00000468800,ENST00000479362,ENST00000358779,ENST00000598846,ENST00000498810,ENST00000463652,ENST00000357760,ENST00000378633,ENST00000509982,ENST00000492390,ENST00000495016,ENST00000356937,ENST00000464748,ENST00000246421,ENST00000617444,ENST00000356200,ENST00000481276,ENST00000489300,ENST00000355439,ENST00000480991…	ENSG00000008128,ENSG00000189339,ENSG00000268575,ENSG00000215790	CDK11A,SLC35E2B,RP1-283E3.8,SLC35E2	hsa_circ_0000006	1	1669664	1734835	-
1:167303474|167332535	0	2.62281	0	0	0	0	0.874269	0	-0.874269	0.339128	0.921644	exon	ENST00000442313,ENST00000560232,ENST00000559038,ENST00000271411,ENST00000541643	ENSG00000143190	POU2F1	---	---	---	---	---
1:167332470|167338258	3.7994	1.83985	3.08548	4.35312	0	1.28966	2.90825	1.88093	-1.02732	0.954479	0.983054	exon	ENST00000367865	ENSG00000143190	POU2F1	---	---	---	---	---
1:167332470|167372036	0	0	1.80575	1.44098	0	1.28966	0.601917	0.910213	0.308296	0.926205	0.977053	exon	ENST00000367865,ENST00000420254,ENST00000367862,ENST00000560232,ENST00000557909,ENST00000271411,ENST00000541643,ENST00000429375,ENST00000367866	ENSG00000143190	POU2F1	hsa_circ_0015094	1	167332470	167372036	+
1:167383857|167401556	0	0	0	1.09988	0	0	0	0.366626	0.366626	0.661625	0.921644	exon	ENST00000367865,ENST00000420254,ENST00000367862,ENST00000443275,ENST00000271411,ENST00000541643,ENST00000429375,ENST00000367866	ENSG00000143190	POU2F1	---	---	---	---	---
1:167397994|167401556	0	0	0	0	2.84602	0	0	0.948672	0.948672	0.330659	0.921644	exon	ENST00000367865,ENST00000420254,ENST00000367862,ENST00000443275,ENST00000271411,ENST00000541643,ENST00000429375,ENST00000367866	ENSG00000143190	POU2F1	---	---	---	---	---
1:167546101|167548121	2.54748	1.83985	0	0	3.3625	0	1.46245	1.12083	-0.341614	0.955647	0.983054	exon	ENST00000370509	ENSG00000143162	CREG1	---	---	---	---	---
1:167690049|167697842	0	0	0	1.94801	0	0	0	0.649335	0.649335	0.47295	0.921644	exon	ENST00000537350,ENST00000367854	ENSG00000198771	RCSD1	hsa_circ_0000150	1	167690049	167697842	+
1:167694099|167697842	0	0	2.11375	0	0	0	0.704583	0	-0.704583	0.413185	0.921644	exon	ENST00000537350,ENST00000367854	ENSG00000198771	RCSD1	hsa_circ_0015105	1	167694099	167697842	+
1:167765583|167773368	0	3.1275	0	0	0	0	1.0425	0	-1.0425	0.267733	0.921644	exon	ENST00000465787,ENST00000359523,ENST00000474859,ENST00000367853,ENST00000448405,ENST00000474729	ENSG00000197965	MPZL1	hsa_circ_0015107	1	167765583	167773368	+
15:41668828|41669958	8.36867	7.71396	6.57016	7.708	7.09995	6.73422	7.55093	7.18072	-0.370208	0.369643	0.921644	exon	ENST00000566718,ENST00000545763,ENST00000563576,ENST00000566586,ENST00000219905	ENSG00000174197	MGA	hsa_circ_0000591	15	41668828	41669958	+
1:167772275|167776166	1.38702	0	1.41363	1.44098	2.84602	3.03976	0.933551	2.44225	1.5087	0.193073	0.921644	exon	ENST00000359523,ENST00000474729	ENSG00000197965	MPZL1	hsa_circ_0007921	1	167772275	167776166	+
14:21503173|21503881	7.48133	7.35335	7.7911	8.08431	7.59166	7.99587	7.54193	7.89061	0.348688	0.187867	0.921644	exon	ENST00000537163,ENST00000298717,ENST00000538267,ENST00000396522,ENST00000543235,ENST00000536201,ENST00000544248,ENST00000542054	ENSG00000165819	METTL3	hsa_circ_0000523	14	21503173	21503881	-
17:59731421|59738947	8.12332	7.52483	6.95584	7.03091	7.54461	7.21296	7.53466	7.26282	-0.271838	0.265514	0.921644	exon	ENST00000591315,ENST00000262291,ENST00000589823,ENST00000585847,ENST00000586245	ENSG00000062716	VMP1	hsa_circ_0006508	17	59731421	59738947	+
1:167966629|168004793	0	0	1.80575	1.09988	0	0	0.601917	0.366626	-0.235292	0.812515	0.935584	exon	ENST00000312263,ENST00000470721,ENST00000367840,ENST00000367843	ENSG00000143164	DCAF6	hsa_circ_0015112	1	167966629	168004793	+
1:167987495|167993440	0	0	0	1.71665	0	0	0	0.572217	0.572217	0.523576	0.921644	exon	ENST00000312263,ENST00000470721,ENST00000432587,ENST00000367840,ENST00000367843	ENSG00000143164	DCAF6	---	---	---	---	---
1:167987495|168004793	0	0	1.41363	0	0	0	0.471212	0	-0.471212	0.566201	0.921644	exon	ENST00000312263,ENST00000470721,ENST00000432587,ENST00000367840,ENST00000367843	ENSG00000143164	DCAF6	hsa_circ_0015122	1	167987495	168004793	+
1:167991204|168023047	0	0	0	0.652309	0	0	0	0.217436	0.217436	0.781429	0.921644	exon	ENST00000470721,ENST00000432587,ENST00000367840,ENST00000367843	ENSG00000143164	DCAF6	---	---	---	---	---
1:168002482|168004793	0	0	0	1.09988	0	3.03976	0	1.37988	1.37988	0.144376	0.921644	exon	ENST00000312263,ENST00000470721,ENST00000432587,ENST00000367840,ENST00000367843	ENSG00000143164	DCAF6	hsa_circ_0015124	1	168002482	168004793	+
1:168002482|168023047	0	0	0	1.44098	0	0	0	0.480325	0.480325	0.5841	0.921644	exon	ENST00000470721,ENST00000432587,ENST00000367840,ENST00000367843	ENSG00000143164	DCAF6	hsa_circ_0015126	1	168002482	168023047	+
1:168002482|168045227	0	0	0	1.09988	0	0	0	0.366626	0.366626	0.661625	0.921644	exon	ENST00000312263,ENST00000432587,ENST00000367840,ENST00000367843	ENSG00000143164	DCAF6	---	---	---	---	---
1:168019545|168023047	1.38702	0	0	0	0	0	0.46234	0	-0.46234	0.58606	0.921644	exon	ENST00000470721	ENSG00000143164	DCAF6	---	---	---	---	---
1:168019545|168045227	2.08091	0	0	0	0	1.95955	0.693638	0.653185	-0.0404536	0.959894	0.983054	exon_intron	ENST00000312263,ENST00000470721,ENST00000478668,ENST00000432587,ENST00000460432,ENST00000489398,ENST00000367840,ENST00000367843	ENSG00000143164	DCAF6	---	---	---	---	---
1:168019545|168068463	0	0	1.41363	0	2.03388	0	0.471212	0.677962	0.20675	0.883371	0.960332	exon_intron	ENST00000312263,ENST00000470721,ENST00000478668,ENST00000432587,ENST00000460432,ENST00000489398,ENST00000367840,ENST00000367843	ENSG00000143164	DCAF6	---	---	---	---	---
1:168022988|168045227	0	3.50067	0	0	0	0	1.16689	0	-1.16689	0.223389	0.921644	exon	ENST00000432587,ENST00000367840,ENST00000367843	ENSG00000143164	DCAF6	---	---	---	---	---
1:168022988|168068463	1.38702	0	0	0	0	0	0.46234	0	-0.46234	0.58606	0.921644	exon	ENST00000432587,ENST00000367840,ENST00000367843	ENSG00000143164	DCAF6	hsa_circ_0015131	1	168022988	168068463	+
1:168038371|168045227	3.62148	0	3.08548	3.25931	0	0	2.23565	1.08644	-1.14922	0.704163	0.921644	exon	ENST00000312263,ENST00000432587,ENST00000367840,ENST00000367843	ENSG00000143164	DCAF6	hsa_circ_0000155	1	168038371	168045227	+
1:168038371|168068463	0	1.83985	0.873449	0	2.84602	0	0.904434	0.948672	0.0442377	0.793094	0.929836	exon	ENST00000312263,ENST00000432587,ENST00000367840,ENST00000367843	ENSG00000143164	DCAF6	hsa_circ_0015132	1	168038371	168068463	+
1:168043025|168045227	1.38702	3.79688	0	1.94801	0	1.28966	1.72797	1.07922	-0.648743	0.439661	0.921644	exon	ENST00000312263,ENST00000432587,ENST00000489398,ENST00000367840,ENST00000367843	ENSG00000143164	DCAF6	hsa_circ_0015133	1	168043025	168045227	+
1:168043025|168068463	0	0	0.873449	1.09988	0	1.95955	0.29115	1.01981	0.728661	0.569211	0.921644	exon	ENST00000312263,ENST00000432587,ENST00000489398,ENST00000367840,ENST00000367843	ENSG00000143164	DCAF6	hsa_circ_0015134	1	168043025	168068463	+
1:168044585|168045227	2.08091	0	0	0	0	0	0.693638	0	-0.693638	0.429293	0.921644	exon	ENST00000312263,ENST00000432587,ENST00000489398,ENST00000367840,ENST00000367843	ENSG00000143164	DCAF6	---	---	---	---	---
1:168044900|168068463	0	0	1.41363	0	0	0	0.471212	0	-0.471212	0.566201	0.921644	exon	ENST00000312263,ENST00000432587,ENST00000489398,ENST00000367840,ENST00000367843	ENSG00000143164	DCAF6	---	---	---	---	---
2:230442937|230450255	7.20945	7.37594	7.8443	7.54973	7.06703	8.00401	7.47656	7.54026	0.063699	0.873463	0.956149	exon	ENST00000409824,ENST00000340126,ENST00000427101,ENST00000409112,ENST00000264052,ENST00000409897,ENST00000409341	ENSG00000067066	SP100	hsa_circ_0003922	2	230442937	230450255	+
1:168065590|168068463	2.08091	1.83985	0	0.652309	2.84602	1.28966	1.30692	1.596	0.289073	0.839983	0.941209	exon	ENST00000312263,ENST00000432587,ENST00000489398,ENST00000367840,ENST00000367843	ENSG00000143164	DCAF6	---	---	---	---	---
1:168065747|168066375	0	0	0	1.09988	0	0	0	0.366626	0.366626	0.661625	0.921644	intron	ENST00000312263,ENST00000432587,ENST00000489398,ENST00000367840,ENST00000367843	ENSG00000143164	DCAF6	---	---	---	---	---
1:168096508|168104894	0	0	0	0.652309	0	0	0	0.217436	0.217436	0.781429	0.921644	exon	ENST00000367835,ENST00000367838,ENST00000493800,ENST00000271357,ENST00000537209	ENSG00000143147	GPR161	---	---	---	---	---
1:59321536|59378837	8.25883	7.44164	6.70283	7.20311	8.27848	7.81333	7.46777	7.76497	0.297206	0.742229	0.921644	exon	ENST00000371212,ENST00000430447,ENST00000495718,ENST00000413489,ENST00000635156,ENST00000303721,ENST00000634364,ENST00000634399,ENST00000371218	ENSG00000172456	FGGY	hsa_circ_0005354	1	59321536	59378837	+
1:168104477|168114549	0	0	0	1.44098	0	0	0	0.480325	0.480325	0.5841	0.921644	exon	ENST00000367835,ENST00000367838	ENSG00000143147	GPR161	hsa_circ_0015137	1	168104477	168114549	-
1:168183902|168196642	0	0	0	1.71665	0	0	0	0.572217	0.572217	0.523576	0.921644	exon	ENST00000367833	ENSG00000143155	TIPRL	---	---	---	---	---
1:168231514|168236770	0	0	0	2.32244	4.04223	1.28966	0	2.55145	2.55145	0.00336616	0.921644	exon	ENST00000471981,ENST00000630869,ENST00000367829,ENST00000271375	ENSG00000213064	SFT2D2	---	---	---	---	---
1:168231514|168239160	1.38702	3.1275	0	0	0	0	1.50484	0	-1.50484	0.237236	0.921644	exon	ENST00000630869,ENST00000367829,ENST00000271375	ENSG00000213064	SFT2D2	hsa_circ_0006593	1	168231514	168239160	+
2:207976651|207977586	7.56985	7.42007	7.36555	7.47753	6.40202	7.45787	7.45182	7.11247	-0.33935	0.443015	0.921644	exon	ENST00000427836,ENST00000457206	ENSG00000178385	PLEKHM3	hsa_circ_0001095	2	207976651	207977586	-
1:168235101|168243069	0	1.83985	1.80575	2.14734	0	0	1.2152	0.715779	-0.499423	0.86811	0.953201	exon	ENST00000271375	ENSG00000213064	SFT2D2	---	---	---	---	---
1:168236589|168243069	0	1.83985	0	0	2.03388	1.95955	0.613285	1.33115	0.717862	0.653758	0.921644	exon	ENST00000630869,ENST00000271375	ENSG00000213064	SFT2D2	---	---	---	---	---
1:168236712|168243069	0	0	0	1.44098	0	0	0	0.480325	0.480325	0.5841	0.921644	exon	ENST00000630869,ENST00000271375	ENSG00000213064	SFT2D2	---	---	---	---	---
1:168239131|168243069	0	3.1275	0	1.94801	2.03388	2.41525	1.0425	2.13238	1.08988	0.770765	0.921644	exon	ENST00000630869,ENST00000271375	ENSG00000213064	SFT2D2	---	---	---	---	---
1:168291160|168305196	0	1.83985	0	0	0	0	0.613285	0	-0.613285	0.494453	0.921644	exon	ENST00000367821	ENSG00000143178	TBX19	hsa_circ_0015150	1	168291160	168305196	+
1:168291160|168308877	0	0	2.77067	1.09988	0	2.41525	0.923558	1.17171	0.248152	0.943302	0.981847	exon	ENST00000431969,ENST00000367821	ENSG00000143178	TBX19	---	---	---	---	---
1:168297724|168308877	0	1.83985	0.873449	0.652309	0	3.03976	0.904434	1.23069	0.326255	0.561153	0.921644	exon	ENST00000431969,ENST00000441464,ENST00000367821	ENSG00000143178	TBX19	---	---	---	---	---
1:168300422|168308877	0	0	0	0	0	1.28966	0	0.429887	0.429887	0.635324	0.921644	exon	ENST00000431969,ENST00000441464,ENST00000367821	ENSG00000143178	TBX19	---	---	---	---	---
1:169169447|169287408	1.38702	0	0	0	2.03388	0	0.46234	0.677962	0.215622	0.858511	0.949777	exon	ENST00000472647,ENST00000525440,ENST00000367811	ENSG00000143156	NME7	---	---	---	---	---
5:145796442|145826200	8.01036	7.42007	6.88652	7.0621	6.68842	7.11111	7.43898	6.95388	-0.485105	0.114316	0.921644	exon	ENST00000394450	ENSG00000186314	PRELID2	hsa_circ_0008647	5	145796442	145826200	-
1:169230718|169310080	0	0	1.41363	0	0	1.95955	0.471212	0.653185	0.181973	0.85923	0.949777	exon	ENST00000472647,ENST00000525440,ENST00000367811,ENST00000528517	ENSG00000143156	NME7	---	---	---	---	---
1:169287303|169310080	0	0	2.36742	0	3.3625	1.28966	0.789141	1.55072	0.761578	0.6998	0.921644	exon	ENST00000469474,ENST00000472647,ENST00000480478,ENST00000525440,ENST00000367811,ENST00000524967,ENST00000528517	ENSG00000143156	NME7	---	---	---	---	---
1:16929846|16930594	0	0	1.41363	0	4.04223	0	0.471212	1.34741	0.8762	0.44347	0.921644	exon	ENST00000467938,ENST00000375541	ENSG00000058453	CROCC	---	---	---	---	---
1:16929846|16940093	0	0	0	1.94801	0	2.41525	0	1.45442	1.45442	0.183834	0.921644	exon	ENST00000467938,ENST00000375541	ENSG00000058453	CROCC	---	---	---	---	---
1:169298556|169310080	0	0	0	1.44098	0	1.95955	0	1.13351	1.13351	0.332557	0.921644	exon	ENST00000469474,ENST00000472647,ENST00000480478,ENST00000525440,ENST00000367811,ENST00000524967,ENST00000528517,ENST00000485609	ENSG00000143156	NME7	---	---	---	---	---
1:169298556|169324500	0	0	0	2.86562	0	1.28966	0	1.38509	1.38509	0.160575	0.921644	exon	ENST00000525440,ENST00000367811,ENST00000524967,ENST00000528517,ENST00000485609	ENSG00000143156	NME7	---	---	---	---	---
1:16930124|16946991	0	0	0	0.652309	0	0	0	0.217436	0.217436	0.781429	0.921644	exon	ENST00000467938,ENST00000375541	ENSG00000058453	CROCC	---	---	---	---	---
1:169303145|169324500	0	1.83985	0.873449	0	0	1.28966	0.904434	0.429887	-0.474547	0.743309	0.921644	exon	ENST00000527460,ENST00000491225,ENST00000525440,ENST00000367811,ENST00000524967,ENST00000528517,ENST00000485609	ENSG00000143156	NME7	---	---	---	---	---
1:169309970|169324500	2.08091	1.83985	0	0	0	0	1.30692	0	-1.30692	0.245986	0.921644	exon	ENST00000527460,ENST00000491225,ENST00000525440,ENST00000367811,ENST00000524967,ENST00000528517,ENST00000485609	ENSG00000143156	NME7	hsa_circ_0000156	1	169309970	169324500	-
1:16936637|16944282	0	1.83985	0	0	0	0	0.613285	0	-0.613285	0.494453	0.921644	exon	ENST00000467938,ENST00000375541,ENST00000445545	ENSG00000058453	CROCC	---	---	---	---	---
1:169376540|169387209	0	0	0	0	0	2.41525	0	0.805084	0.805084	0.395572	0.921644	exon	ENST00000329281,ENST00000367808	ENSG00000117475	BLZF1	---	---	---	---	---
1:16938400|16944282	0	0	1.41363	0	0	0	0.471212	0	-0.471212	0.566201	0.921644	exon	ENST00000467938,ENST00000375541,ENST00000445545	ENSG00000058453	CROCC	---	---	---	---	---
1:16944100|16945606	0	0	0	0	0	1.28966	0	0.429887	0.429887	0.635324	0.921644	exon	ENST00000467938,ENST00000375541,ENST00000492631,ENST00000445545,ENST00000494191	ENSG00000058453	CROCC	---	---	---	---	---
1:169468111|169470186	0	0	0	0.652309	0	0	0	0.217436	0.217436	0.781429	0.921644	exon	ENST00000236137,ENST00000367804	ENSG00000117479	SLC19A2	---	---	---	---	---
1:169477155|169477757	0	3.1275	2.77067	1.44098	3.3625	0	1.96606	1.60116	-0.364902	0.821013	0.938733	exon	ENST00000236137	ENSG00000117479	SLC19A2	hsa_circ_0015164	1	169477155	169477757	-
1:16969341|16969766	0	0	1.80575	0	0	0	0.601917	0	-0.601917	0.475406	0.921644	intron	ENST00000465021,ENST00000375541	ENSG00000058453	CROCC	---	---	---	---	---
1:16976501|16977195	0	0	0.873449	0	0	0	0.29115	0	-0.29115	0.69286	0.921644	exon	ENST00000478684,ENST00000375534,ENST00000476788,ENST00000490075,ENST00000492598,ENST00000375535	ENSG00000117122	MFAP2	---	---	---	---	---
1:169798857|169803309	0	0	0	0.652309	0	0	0	0.217436	0.217436	0.781429	0.921644	exon	ENST00000472795,ENST00000286031,ENST00000413811,ENST00000359326,ENST00000498289	ENSG00000000460	C1orf112	---	---	---	---	---
1:169798857|169807929	1.38702	0	0	1.71665	0	0	0.46234	0.572217	0.109878	0.884168	0.960332	exon	ENST00000286031,ENST00000359326,ENST00000498289	ENSG00000000460	C1orf112	hsa_circ_0015171	1	169798857	169807929	+
1:169802621|169804240	0	3.50067	0	0	0	0	1.16689	0	-1.16689	0.223389	0.921644	exon	ENST00000496973,ENST00000481744,ENST00000459772,ENST00000472795,ENST00000286031,ENST00000413811,ENST00000466580,ENST00000359326,ENST00000498289	ENSG00000000460	C1orf112	---	---	---	---	---
1:169836927|169850327	2.54748	3.1275	0	0	0	0	1.89166	0	-1.89166	0.183756	0.921644	exon	ENST00000459772,ENST00000286031,ENST00000413811,ENST00000359326,ENST00000498289	ENSG00000000460	C1orf112	---	---	---	---	---
1:169859041|169888890	0	0	1.41363	0	0	0	0.471212	0	-0.471212	0.566201	0.921644	exon	ENST00000367771,ENST00000423670,ENST00000367772	ENSG00000000457	SCYL3	---	---	---	---	---
1:169862613|169869039	2.89947	0	0	0	2.03388	0	0.966489	0.677962	-0.288527	0.741019	0.921644	exon	ENST00000367771,ENST00000423670,ENST00000470238,ENST00000367770,ENST00000367772	ENSG00000000457	SCYL3	---	---	---	---	---
1:169862613|169869128	2.54748	0	2.58309	1.94801	0	1.28966	1.71019	1.07922	-0.630968	0.540852	0.921644	exon	ENST00000470238	ENSG00000000457	SCYL3	---	---	---	---	---
1:169862613|169870357	0	1.83985	0	0	0	0	0.613285	0	-0.613285	0.494453	0.921644	exon	ENST00000367771,ENST00000423670,ENST00000470238,ENST00000367770,ENST00000367772	ENSG00000000457	SCYL3	---	---	---	---	---
1:169862613|169878819	0	0	0	1.44098	0	0	0	0.480325	0.480325	0.5841	0.921644	exon	ENST00000367771,ENST00000423670,ENST00000470238,ENST00000367770,ENST00000367772	ENSG00000000457	SCYL3	hsa_circ_0015178	1	169862613	169878819	-
1:169866896|169878819	0	0	0.873449	0.652309	0	0	0.29115	0.217436	-0.0737133	0.941112	0.98174	exon	ENST00000367771,ENST00000423670,ENST00000470238,ENST00000367770,ENST00000367772	ENSG00000000457	SCYL3	---	---	---	---	---
1:169954011|169961235	0	0	1.41363	0	0	0	0.471212	0	-0.471212	0.566201	0.921644	exon	ENST00000367765,ENST00000367767,ENST00000361580,ENST00000538366	ENSG00000075945	KIFAP3	---	---	---	---	---
1:169954011|169984690	0	0	2.11375	0	0	0	0.704583	0	-0.704583	0.413185	0.921644	exon	ENST00000367765,ENST00000367767,ENST00000361580,ENST00000538366	ENSG00000075945	KIFAP3	---	---	---	---	---
1:169972513|169992255	0	0	0	0.652309	0	0	0	0.217436	0.217436	0.781429	0.921644	exon	ENST00000367765,ENST00000367767,ENST00000361580,ENST00000538366	ENSG00000075945	KIFAP3	hsa_circ_0015185	1	169972513	169992255	-
1:170016462|170024596	1.38702	0	0	0	0	0	0.46234	0	-0.46234	0.58606	0.921644	exon	ENST00000367765,ENST00000367767,ENST00000361580,ENST00000538366	ENSG00000075945	KIFAP3	hsa_circ_0015189	1	170016462	170024596	-
1:170024418|170038431	0	0	0	1.71665	0	1.95955	0	1.2254	1.2254	0.293626	0.921644	exon	ENST00000367765,ENST00000367767,ENST00000361580,ENST00000538366	ENSG00000075945	KIFAP3	---	---	---	---	---
1:170024418|170055436	2.08091	0	0	0	0	0	0.693638	0	-0.693638	0.429293	0.921644	exon	ENST00000367765,ENST00000361580,ENST00000538366	ENSG00000075945	KIFAP3	---	---	---	---	---
1:170031886|170055436	1.38702	0	0	0	0	0	0.46234	0	-0.46234	0.58606	0.921644	exon	ENST00000367765,ENST00000361580,ENST00000538366	ENSG00000075945	KIFAP3	---	---	---	---	---
1:170035454|170055436	0	1.83985	0	0	0	0	0.613285	0	-0.613285	0.494453	0.921644	exon	ENST00000367765,ENST00000361580,ENST00000538366	ENSG00000075945	KIFAP3	---	---	---	---	---
1:17022608|17024074	0	0	0	0.652309	0	0	0	0.217436	0.217436	0.781429	0.921644	exon	ENST00000485515,ENST00000375499	ENSG00000117118	SDHB	---	---	---	---	---
1:1703824|1704146	0	0	0	0.652309	0	0	0	0.217436	0.217436	0.781429	0.921644	exon	ENST00000404249,ENST00000358779,ENST00000463652,ENST00000357760,ENST00000378633,ENST00000509982,ENST00000356937,ENST00000356200,ENST00000378638,ENST00000491311,ENST00000460465	ENSG00000008128	CDK11A	---	---	---	---	---
1:170536310|170544845	0	0	0	0	2.03388	0	0	0.677962	0.677962	0.50093	0.921644	exon	ENST00000498166	ENSG00000120370	GORAB	---	---	---	---	---
1:170539210|170544845	0	2.62281	0	0	0	1.95955	0.874269	0.653185	-0.221085	0.835778	0.941209	exon	ENST00000367763,ENST00000498600,ENST00000367762,ENST00000498166	ENSG00000120370	GORAB	hsa_circ_0000159	1	170539210	170544845	+
1:170719726|170726401	0	0	1.80575	0	0	0	0.601917	0	-0.601917	0.475406	0.921644	exon	ENST00000239461,ENST00000497230,ENST00000367760	ENSG00000116132	PRRX1	hsa_circ_0004370	1	170719726	170726401	+
1:170719726|170730348	0	0	1.41363	0	0	1.28966	0.471212	0.429887	-0.041324	0.955876	0.983054	exon	ENST00000367760	ENSG00000116132	PRRX1	hsa_circ_0007745	1	170719726	170730348	+
1:171267543|171282333	0	0	0	1.71665	0	1.28966	0	1.0021	1.0021	0.391243	0.921644	exon	ENST00000617670,ENST00000354841,ENST00000367750,ENST00000469112	ENSG00000010932	FMO1	---	---	---	---	---
1:171275346|171283216	0	0	2.11375	0	2.84602	0	0.704583	0.948672	0.244089	0.861452	0.950934	exon	ENST00000617670,ENST00000354841,ENST00000402921,ENST00000367750,ENST00000469112	ENSG00000010932	FMO1	---	---	---	---	---
1:171512032|171515859	0	0	0	1.09988	0	0	0	0.366626	0.366626	0.661625	0.921644	exon	ENST00000426496,ENST00000476522,ENST00000467601,ENST00000367742,ENST00000392078,ENST00000338920	ENSG00000117523	PRRC2C	---	---	---	---	---
1:171512032|171522259	1.38702	1.83985	0	0	0	1.28966	1.07562	0.429887	-0.645737	0.665735	0.921644	exon	ENST00000426496,ENST00000476522,ENST00000367742,ENST00000392078,ENST00000338920	ENSG00000117523	PRRC2C	hsa_circ_0015196	1	171512032	171522259	+
1:171514536|171522259	0	0	0	0.652309	0	0	0	0.217436	0.217436	0.781429	0.921644	exon	ENST00000426496,ENST00000476522,ENST00000367742,ENST00000392078,ENST00000338920	ENSG00000117523	PRRC2C	hsa_circ_0015198	1	171514536	171522259	+
1:171522177|171523522	1.38702	0	0	2.74778	0	0	0.46234	0.915926	0.453586	0.640012	0.921644	exon	ENST00000426496,ENST00000476522,ENST00000367742,ENST00000392078,ENST00000338920	ENSG00000117523	PRRC2C	hsa_circ_0015207	1	171522177	171523522	+
1:171522177|171524965	0	0	0.873449	1.71665	0	0	0.29115	0.572217	0.281068	0.768855	0.921644	exon	ENST00000426496,ENST00000476522,ENST00000367742,ENST00000392078,ENST00000338920	ENSG00000117523	PRRC2C	---	---	---	---	---
1:171523221|171524965	0	2.62281	2.77067	1.44098	0	2.41525	1.79783	1.28541	-0.512418	0.627347	0.921644	exon	ENST00000426496,ENST00000476522,ENST00000367742,ENST00000392078,ENST00000338920	ENSG00000117523	PRRC2C	hsa_circ_0015210	1	171523221	171524965	+
1:155853276|155853806	7.22511	7.62249	7.45035	7.25262	8.01061	7.79468	7.43265	7.68597	0.253321	0.377892	0.921644	exon	ENST00000471341,ENST00000368331,ENST00000615926,ENST00000622608,ENST00000361040,ENST00000271883,ENST00000437809,ENST00000620426,ENST00000488251	ENSG00000116580	GON4L	hsa_circ_0000139	1	155853276	155853806	-
1:171535428|171537473	0	1.83985	0	0	0	0	0.613285	0	-0.613285	0.494453	0.921644	exon	ENST00000426496,ENST00000367742,ENST00000338920	ENSG00000117523	PRRC2C	---	---	---	---	---
1:185214507|185231708	7.64163	7.65978	6.78132	7.32127	7.52049	7.22694	7.36091	7.35624	-0.00467341	0.750256	0.921644	exon	ENST00000367501,ENST00000367500	ENSG00000116668	SWT1	hsa_circ_0004689	1	185214507	185231708	+
1:171568247|171587751	0	0	0	1.44098	0	0	0	0.480325	0.480325	0.5841	0.921644	exon	ENST00000426496,ENST00000367742,ENST00000338920	ENSG00000117523	PRRC2C	---	---	---	---	---
1:171574927|171577637	0	0	0	0	0	2.41525	0	0.805084	0.805084	0.395572	0.921644	exon	ENST00000426496,ENST00000495585,ENST00000367742,ENST00000338920	ENSG00000117523	PRRC2C	hsa_circ_0002269	1	171574927	171577637	+
1:171579354|171584526	2.08091	0	0	0	0	0	0.693638	0	-0.693638	0.429293	0.921644	exon	ENST00000426496,ENST00000495585,ENST00000367742,ENST00000338920	ENSG00000117523	PRRC2C	---	---	---	---	---
1:171579354|171587751	0	0	1.80575	2.14734	2.84602	0	0.601917	1.66445	1.06253	0.457343	0.921644	exon	ENST00000426496,ENST00000495585,ENST00000367742,ENST00000338920	ENSG00000117523	PRRC2C	hsa_circ_0015243	1	171579354	171587751	+
1:171579354|171588505	1.38702	0	0	0	0	0	0.46234	0	-0.46234	0.58606	0.921644	exon	ENST00000426496,ENST00000495585,ENST00000367742,ENST00000338920	ENSG00000117523	PRRC2C	---	---	---	---	---
1:171783740|171794527	0	1.83985	0	0	0	0	0.613285	0	-0.613285	0.494453	0.921644	exon	ENST00000362019,ENST00000361735,ENST00000367737	ENSG00000010165	METTL13	hsa_circ_0007834	1	171783740	171794527	+
1:172033105|172092875	0	0	0	1.44098	0	0	0	0.480325	0.480325	0.5841	0.921644	exon	ENST00000523513,ENST00000355305,ENST00000367733,ENST00000520906,ENST00000367731,ENST00000627582	ENSG00000197959	DNM3	---	---	---	---	---
1:172038319|172068905	0	0	0	1.44098	0	0	0	0.480325	0.480325	0.5841	0.921644	exon	ENST00000523513,ENST00000355305,ENST00000367733,ENST00000520906,ENST00000367731,ENST00000627582	ENSG00000197959	DNM3	---	---	---	---	---
1:172042009|172131288	0	0	0	0	0	1.95955	0	0.653185	0.653185	0.485036	0.921644	exon	ENST00000523513,ENST00000355305,ENST00000367733,ENST00000520906,ENST00000367731,ENST00000627582	ENSG00000197959	DNM3	---	---	---	---	---
1:172068819|172308839	0	0	1.41363	0	0	0	0.471212	0	-0.471212	0.566201	0.921644	exon	ENST00000355305,ENST00000520906,ENST00000367731,ENST00000627582	ENSG00000197959	DNM3	---	---	---	---	---
1:172131175|172253682	0	0	0.873449	0	0	0	0.29115	0	-0.29115	0.69286	0.921644	exon	ENST00000355305,ENST00000520906,ENST00000367731,ENST00000627582	ENSG00000197959	DNM3	---	---	---	---	---
1:172379018|172388809	0	0	0	0	0	2.41525	0	0.805084	0.805084	0.395572	0.921644	exon	ENST00000355305,ENST00000367731,ENST00000485254,ENST00000627582	ENSG00000197959	DNM3	---	---	---	---	---
1:172387133|172388809	1.38702	1.83985	1.41363	1.09988	2.03388	0	1.54684	1.04459	-0.502249	0.762847	0.921644	exon	ENST00000355305,ENST00000367731,ENST00000485254,ENST00000627582	ENSG00000197959	DNM3	---	---	---	---	---
6:154773989|154795139	7.46823	7.64126	6.94614	6.9195	7.33934	6.98515	7.35187	7.08133	-0.270542	0.200809	0.921644	exon	ENST00000367186,ENST00000417268,ENST00000367178	ENSG00000213079	SCAF8	hsa_circ_0001654	6	154773989	154795139	+
1:172551512|172570730	1.38702	0	0	0	0	0	0.46234	0	-0.46234	0.58606	0.921644	exon	ENST00000608151,ENST00000263688,ENST00000616058,ENST00000367723,ENST00000610051	ENSG00000094975	SUCO	hsa_circ_0015259	1	172551512	172570730	+
1:172551512|172579267	0	1.83985	0	1.71665	0	0	0.613285	0.572217	-0.0410675	0.993518	0.996909	exon	ENST00000608151,ENST00000263688,ENST00000616058,ENST00000367723,ENST00000610051	ENSG00000094975	SUCO	hsa_circ_0015260	1	172551512	172579267	+
1:172551512|172591071	2.54748	0	0	0	0	0	0.849161	0	-0.849161	0.345815	0.921644	exon	ENST00000608151,ENST00000263688,ENST00000616058,ENST00000367723,ENST00000610051	ENSG00000094975	SUCO	hsa_circ_0015261	1	172551512	172591071	+
1:172553260|172557794	0	0	0	1.09988	0	0	0	0.366626	0.366626	0.661625	0.921644	exon	ENST00000263688,ENST00000616058	ENSG00000094975	SUCO	---	---	---	---	---
11:130260856|130261929	8.30377	7.60348	6.14753	7.23631	6.23422	7.17019	7.3516	6.88024	-0.471357	0.312793	0.921644	exon	ENST00000615689,ENST00000397753,ENST00000445008,ENST00000357899,ENST00000525842,ENST00000529348	ENSG00000196323	ZBTB44	hsa_circ_0002484	11	130260856	130261929	-
1:172555869|172570730	1.38702	0	0	0	0	0	0.46234	0	-0.46234	0.58606	0.921644	exon	ENST00000608151,ENST00000263688,ENST00000616058,ENST00000608804,ENST00000367723,ENST00000610051	ENSG00000094975	SUCO	---	---	---	---	---
1:172555869|172579267	0	0	0	1.94801	0	1.28966	0	1.07922	1.07922	0.350143	0.921644	exon	ENST00000608151,ENST00000263688,ENST00000616058,ENST00000367723,ENST00000610051	ENSG00000094975	SUCO	hsa_circ_0015263	1	172555869	172579267	+
1:172557644|172578389	0	0	0	0	2.03388	0	0	0.677962	0.677962	0.50093	0.921644	exon	ENST00000608151,ENST00000263688,ENST00000616058,ENST00000367723,ENST00000610051	ENSG00000094975	SUCO	---	---	---	---	---
1:172569019|172579267	0	0	2.58309	0	0	0	0.861031	0	-0.861031	0.328374	0.921644	exon	ENST00000608151,ENST00000263688,ENST00000616058,ENST00000367723,ENST00000610051	ENSG00000094975	SUCO	---	---	---	---	---
1:172569019|172585948	0	0	0	0	2.84602	0	0	0.948672	0.948672	0.330659	0.921644	exon	ENST00000608151,ENST00000263688,ENST00000367723,ENST00000610051	ENSG00000094975	SUCO	---	---	---	---	---
1:172600064|172602787	0	0	0	0.652309	0	3.27325	0	1.30852	1.30852	0.243939	0.921644	exon	ENST00000608151,ENST00000263688,ENST00000616058,ENST00000367723,ENST00000610051	ENSG00000094975	SUCO	hsa_circ_0015264	1	172600064	172602787	+
1:173517537|173587830	3.1822	0	0	0.652309	0	0	1.06073	0.217436	-0.843296	0.419509	0.921644	exon	ENST00000367714	ENSG00000162753	SLC9C2	---	---	---	---	---
1:173521301|173526714	0	1.83985	0	1.44098	2.03388	1.28966	0.613285	1.58817	0.97489	0.573804	0.921644	exon	ENST00000466087,ENST00000367714	ENSG00000162753	SLC9C2	---	---	---	---	---
1:173521301|173530054	0	0	0	1.44098	0	0	0	0.480325	0.480325	0.5841	0.921644	exon	ENST00000466087,ENST00000367714	ENSG00000162753	SLC9C2	---	---	---	---	---
1:173521301|173547784	0	1.83985	0	0	0	0	0.613285	0	-0.613285	0.494453	0.921644	exon	ENST00000466087,ENST00000367714	ENSG00000162753	SLC9C2	---	---	---	---	---
1:173521301|173557508	0	0	1.41363	0	0	0	0.471212	0	-0.471212	0.566201	0.921644	exon	ENST00000466087,ENST00000367714	ENSG00000162753	SLC9C2	---	---	---	---	---
1:173521301|173587830	1.38702	0	0	0	0	0	0.46234	0	-0.46234	0.58606	0.921644	exon	ENST00000367714	ENSG00000162753	SLC9C2	---	---	---	---	---
1:173523969|173530054	0	0	0	0	0	1.28966	0	0.429887	0.429887	0.635324	0.921644	exon	ENST00000466087,ENST00000367714	ENSG00000162753	SLC9C2	---	---	---	---	---
1:173573182|173587830	0	0	2.36742	1.44098	0	0	0.789141	0.480325	-0.308816	0.729022	0.921644	exon	ENST00000367714	ENSG00000162753	SLC9C2	---	---	---	---	---
1:173573182|173598032	3.1822	0	2.58309	1.09988	2.03388	3.27325	1.92176	2.13567	0.213909	0.925928	0.977053	exon	ENST00000367714	ENSG00000162753	SLC9C2	---	---	---	---	---
1:173624787|173627159	0	0	1.41363	0.652309	0	0	0.471212	0.217436	-0.253775	0.800965	0.931732	exon	ENST00000333279	ENSG00000183831	ANKRD45	---	---	---	---	---
1:173624787|173647013	0	0	0	0	2.84602	0	0	0.948672	0.948672	0.330659	0.921644	exon	ENST00000333279	ENSG00000183831	ANKRD45	---	---	---	---	---
1:173733713|173734286	2.54748	2.62281	1.41363	2.32244	0	1.28966	2.19464	1.20403	-0.990608	0.55241	0.921644	exon	ENST00000493170,ENST00000209884	ENSG00000076321	KLHL20	hsa_circ_0015272	1	173733713	173734286	+
1:173733713|173757159	0	0	0	1.71665	0	0	0	0.572217	0.572217	0.523576	0.921644	exon	ENST00000209884	ENSG00000076321	KLHL20	---	---	---	---	---
1:173751764|173757159	0	0	0	0	2.03388	0	0	0.677962	0.677962	0.50093	0.921644	exon	ENST00000209884	ENSG00000076321	KLHL20	---	---	---	---	---
1:173755923|173757159	0	0	0	1.94801	0	0	0	0.649335	0.649335	0.47295	0.921644	exon	ENST00000209884	ENSG00000076321	KLHL20	---	---	---	---	---
1:173755923|173766289	0	1.83985	3.34375	1.71665	0	1.28966	1.72787	1.0021	-0.725764	0.387737	0.921644	exon	ENST00000209884	ENSG00000076321	KLHL20	---	---	---	---	---
1:173755923|173782230	0	2.62281	0.873449	0	3.3625	0	1.16542	1.12083	-0.0445871	0.873121	0.955856	exon	ENST00000209884	ENSG00000076321	KLHL20	hsa_circ_0015275	1	173755923	173782230	+
1:173756976|173775842	0	0	1.80575	0.652309	0	0	0.601917	0.217436	-0.384481	0.691387	0.921644	exon	ENST00000209884	ENSG00000076321	KLHL20	hsa_circ_0015278	1	173756976	173775842	+
1:173766146|173774438	0	0	0	1.09988	0	0	0	0.366626	0.366626	0.661625	0.921644	exon	ENST00000209884	ENSG00000076321	KLHL20	---	---	---	---	---
1:173766146|173775842	0	0	0.873449	0.652309	0	0	0.29115	0.217436	-0.0737133	0.941112	0.98174	exon	ENST00000209884	ENSG00000076321	KLHL20	hsa_circ_0015279	1	173766146	173775842	+
1:173774305|173775842	0	2.62281	0	2.14734	0	1.28966	0.874269	1.14567	0.271397	0.969671	0.98778	exon	ENST00000209884	ENSG00000076321	KLHL20	hsa_circ_0005794	1	173774305	173775842	+
1:173775634|173782230	1.38702	0	2.11375	0	0	0	1.16692	0	-1.16692	0.281994	0.921644	exon	ENST00000209884	ENSG00000076321	KLHL20	hsa_circ_0015280	1	173775634	173782230	+
1:173826687|173840973	0	0	0	0.652309	0	0	0	0.217436	0.217436	0.781429	0.921644	exon	ENST00000361951	ENSG00000117593	DARS2	---	---	---	---	---
1:173830660|173833499	0	0	2.36742	0	2.03388	0	0.789141	0.677962	-0.11118	0.857977	0.949777	exon	ENST00000361951	ENSG00000117593	DARS2	---	---	---	---	---
1:173830660|173850479	1.38702	0	0	0	0	0	0.46234	0	-0.46234	0.58606	0.921644	exon	ENST00000361951	ENSG00000117593	DARS2	---	---	---	---	---
1:173833376|173840973	0	0	0	0	0	2.41525	0	0.805084	0.805084	0.395572	0.921644	exon	ENST00000361951	ENSG00000117593	DARS2	---	---	---	---	---
1:173833376|173845291	0	0	2.36742	0	0	0	0.789141	0	-0.789141	0.368163	0.921644	exon	ENST00000361951	ENSG00000117593	DARS2	---	---	---	---	---
1:173838190|173840973	0	0	0.873449	0	2.03388	0	0.29115	0.677962	0.386812	0.744024	0.921644	exon	ENST00000361951	ENSG00000117593	DARS2	hsa_circ_0005340	1	173838190	173840973	+
1:173845229|173853905	0	0	0	0	0	1.95955	0	0.653185	0.653185	0.485036	0.921644	exon	ENST00000361951	ENSG00000117593	DARS2	---	---	---	---	---
1:173850327|173853905	0	0	0	0.652309	0	0	0	0.217436	0.217436	0.781429	0.921644	exon	ENST00000361951	ENSG00000117593	DARS2	hsa_circ_0015285	1	173850327	173853905	+
1:173864257|173864704	1.38702	0	0	0	0	0	0.46234	0	-0.46234	0.58606	0.921644	exon	ENST00000451607,ENST00000450589,ENST00000412059,ENST00000456812,ENST00000452197,ENST00000448718,ENST00000449289,ENST00000454813,ENST00000414075,ENST00000449589,ENST00000422183,ENST00000430245,ENST00000436656,ENST00000431268,ENST00000454068,ENST00000436285,ENST00000422207,ENST00000434796,ENST00000444470	ENSG00000234741	GAS5	---	---	---	---	---
1:173864484|173865282	0	2.62281	0	0	0	0	0.874269	0	-0.874269	0.339128	0.921644	exon	ENST00000451607,ENST00000450589,ENST00000412059,ENST00000452197,ENST00000448718,ENST00000449589,ENST00000422183,ENST00000430245,ENST00000422008,ENST00000436656,ENST00000431268,ENST00000454068,ENST00000436285	ENSG00000234741	GAS5	---	---	---	---	---
1:173941265|173943588	2.54748	0	0	0	0	0	0.849161	0	-0.849161	0.345815	0.921644	exon	ENST00000367696,ENST00000258349,ENST00000367694	ENSG00000135870	RC3H1	---	---	---	---	---
1:173941265|173943615	0	0	0.873449	0	0	0	0.29115	0	-0.29115	0.69286	0.921644	exon	ENST00000367696,ENST00000258349	ENSG00000135870	RC3H1	---	---	---	---	---
1:173943442|173964187	0	0	0	1.09988	0	0	0	0.366626	0.366626	0.661625	0.921644	exon	ENST00000367696,ENST00000258349,ENST00000367694	ENSG00000135870	RC3H1	---	---	---	---	---
1:173946476|173952138	0	0	0	1.44098	0	0	0	0.480325	0.480325	0.5841	0.921644	exon	ENST00000367696,ENST00000258349,ENST00000367694	ENSG00000135870	RC3H1	---	---	---	---	---
1:173961077|173964187	1.38702	0	0	0	0	0	0.46234	0	-0.46234	0.58606	0.921644	exon	ENST00000367696,ENST00000258349,ENST00000367694	ENSG00000135870	RC3H1	---	---	---	---	---
1:173964839|173972627	0	0	1.80575	0	0	0	0.601917	0	-0.601917	0.475406	0.921644	exon	ENST00000367696,ENST00000258349,ENST00000367694	ENSG00000135870	RC3H1	---	---	---	---	---
1:173970505|173981009	0	1.83985	0	1.09988	2.84602	0	0.613285	1.3153	0.702013	0.56049	0.921644	exon	ENST00000367696,ENST00000258349,ENST00000367694	ENSG00000135870	RC3H1	---	---	---	---	---
1:173970505|173984619	0	1.83985	2.58309	0	0	0	1.47432	0	-1.47432	0.152272	0.921644	exon	ENST00000367696,ENST00000258349,ENST00000367694	ENSG00000135870	RC3H1	---	---	---	---	---
1:173972509|173993135	0	0	0	0.652309	0	0	0	0.217436	0.217436	0.781429	0.921644	exon	ENST00000367696	ENSG00000135870	RC3H1	---	---	---	---	---
1:173980809|173993135	2.08091	0	0	1.09988	2.84602	1.28966	0.693638	1.74519	1.05155	0.540195	0.921644	exon	ENST00000367696	ENSG00000135870	RC3H1	---	---	---	---	---
8:140818277|140890769	7.59417	7.33041	7.12017	7.36696	7.33934	7.46968	7.34825	7.39199	0.0437415	0.99927	0.999635	exon	ENST00000517887,ENST00000519993,ENST00000340930,ENST00000395218,ENST00000522684,ENST00000521059,ENST00000519419	ENSG00000169398	PTK2	hsa_circ_0005982	8	140818277	140890769	-
1:17412122|17413717	0	0	0	0	0	1.95955	0	0.653185	0.653185	0.485036	0.921644	exon	ENST00000375436,ENST00000375433	ENSG00000179051	RCC2	---	---	---	---	---
1:17416480|17422291	0	0	0.873449	0	2.03388	0	0.29115	0.677962	0.386812	0.744024	0.921644	exon	ENST00000375436,ENST00000375433	ENSG00000179051	RCC2	---	---	---	---	---
1:17416480|17429199	0	0	0	2.14734	0	0	0	0.715779	0.715779	0.433375	0.921644	exon	ENST00000375436,ENST00000375433	ENSG00000179051	RCC2	---	---	---	---	---
1:17420714|17429199	0	0	0	0	0	1.28966	0	0.429887	0.429887	0.635324	0.921644	exon	ENST00000375436,ENST00000375433	ENSG00000179051	RCC2	hsa_circ_0010198	1	17420714	17429199	-
1:174219125|174221164	0	2.62281	0	2.47857	2.84602	0	0.874269	1.77486	0.900593	0.712144	0.921644	exon	ENST00000635248,ENST00000457696,ENST00000357444,ENST00000251507	ENSG00000152061	RABGAP1L	hsa_circ_0008141	1	174219125	174221164	+
1:174219125|174252590	1.38702	0	0	0	0	0	0.46234	0	-0.46234	0.58606	0.921644	exon	ENST00000457696,ENST00000357444,ENST00000251507	ENSG00000152061	RABGAP1L	---	---	---	---	---
1:174220972|174250632	0	0	0	0	0	1.95955	0	0.653185	0.653185	0.485036	0.921644	exon	ENST00000457696,ENST00000357444,ENST00000251507	ENSG00000152061	RABGAP1L	---	---	---	---	---
1:17422203|17425684	0	0	1.41363	0	0	1.95955	0.471212	0.653185	0.181973	0.85923	0.949777	exon	ENST00000375436,ENST00000375433	ENSG00000179051	RCC2	hsa_circ_0010199	1	17422203	17425684	-
1:174231145|174252590	2.54748	0	0	0	0	0	0.849161	0	-0.849161	0.345815	0.921644	exon	ENST00000457696,ENST00000357444,ENST00000251507	ENSG00000152061	RABGAP1L	---	---	---	---	---
1:174231145|174278779	0	1.83985	1.41363	0	0	0	1.0845	0	-1.0845	0.338508	0.921644	exon	ENST00000457696,ENST00000357444,ENST00000251507	ENSG00000152061	RABGAP1L	---	---	---	---	---
1:174231145|174305127	2.08091	0	0	0	2.03388	0	0.693638	0.677962	-0.0156767	0.931041	0.977227	exon	ENST00000457696,ENST00000357444,ENST00000251507	ENSG00000152061	RABGAP1L	---	---	---	---	---
1:174231145|174371072	0	0	0	2.32244	0	0	0	0.774146	0.774146	0.40131	0.921644	exon	ENST00000457696,ENST00000357444,ENST00000251507	ENSG00000152061	RABGAP1L	---	---	---	---	---
1:174241483|174252590	0	0	0.873449	0	0	0	0.29115	0	-0.29115	0.69286	0.921644	exon	ENST00000457696,ENST00000357444,ENST00000251507	ENSG00000152061	RABGAP1L	---	---	---	---	---
1:174241483|174278779	3.4185	0	2.11375	0.652309	0	1.95955	1.84408	0.870621	-0.973461	0.282089	0.921644	exon	ENST00000457696,ENST00000357444,ENST00000251507	ENSG00000152061	RABGAP1L	---	---	---	---	---
1:174241483|174305127	0	0	0.873449	1.94801	0	0	0.29115	0.649335	0.358186	0.703734	0.921644	exon	ENST00000457696,ENST00000357444,ENST00000251507	ENSG00000152061	RABGAP1L	---	---	---	---	---
1:174250475|174278779	0	0	0	1.71665	0	0	0	0.572217	0.572217	0.523576	0.921644	exon	ENST00000457696,ENST00000357444,ENST00000251507	ENSG00000152061	RABGAP1L	---	---	---	---	---
1:174250475|174305127	2.08091	2.62281	0	2.32244	0	0	1.56791	0.774146	-0.793761	0.731697	0.921644	exon	ENST00000457696,ENST00000357444,ENST00000251507	ENSG00000152061	RABGAP1L	---	---	---	---	---
1:174250475|174371072	0	0	2.36742	0	0	0	0.789141	0	-0.789141	0.368163	0.921644	exon	ENST00000457696,ENST00000357444,ENST00000251507	ENSG00000152061	RABGAP1L	---	---	---	---	---
1:174250475|174394145	1.38702	0	0	0	0	0	0.46234	0	-0.46234	0.58606	0.921644	exon	ENST00000457696,ENST00000357444,ENST00000251507	ENSG00000152061	RABGAP1L	---	---	---	---	---
1:174272414|174278779	0	0	0.873449	1.94801	0	0	0.29115	0.649335	0.358186	0.703734	0.921644	exon	ENST00000457696,ENST00000357444,ENST00000251507	ENSG00000152061	RABGAP1L	hsa_circ_0000161	1	174272414	174278779	+
1:174272414|174305127	0	0	1.41363	2.32244	0	2.41525	0.471212	1.57923	1.10802	0.377025	0.921644	exon	ENST00000457696,ENST00000357444,ENST00000251507	ENSG00000152061	RABGAP1L	hsa_circ_0005089	1	174272414	174305127	+
1:174272414|174371072	1.38702	0	0	0	0	0	0.46234	0	-0.46234	0.58606	0.921644	exon	ENST00000457696,ENST00000357444,ENST00000251507	ENSG00000152061	RABGAP1L	hsa_circ_0015331	1	174272414	174371072	+
1:174272414|174394145	2.54748	0	1.80575	0	2.84602	1.28966	1.45108	1.37856	-0.0725183	0.918282	0.976719	exon	ENST00000457696,ENST00000357444,ENST00000251507	ENSG00000152061	RABGAP1L	---	---	---	---	---
1:174275833|174305127	0	0	1.41363	1.44098	2.03388	1.95955	0.471212	1.81147	1.34026	0.411012	0.921644	exon	ENST00000457696,ENST00000357444,ENST00000251507,ENST00000367690	ENSG00000152061	RABGAP1L	---	---	---	---	---
1:174275833|174371072	1.38702	0	2.11375	0	3.74203	1.28966	1.16692	1.67723	0.510309	0.564693	0.921644	exon	ENST00000457696,ENST00000357444,ENST00000251507,ENST00000367690	ENSG00000152061	RABGAP1L	---	---	---	---	---
1:174275833|174394145	0	1.83985	1.80575	0.652309	0	1.95955	1.2152	0.870621	-0.344581	0.827346	0.940299	exon	ENST00000457696,ENST00000357444,ENST00000251507,ENST00000367690	ENSG00000152061	RABGAP1L	hsa_circ_0006029	1	174275833	174394145	+
1:174370979|174637488	0	0	0	0.652309	0	0	0	0.217436	0.217436	0.781429	0.921644	exon	ENST00000526253,ENST00000251507	ENSG00000152061	RABGAP1L	---	---	---	---	---
1:174637375|174702256	2.08091	0	0	2.61944	0	0	0.693638	0.873148	0.17951	0.850797	0.947051	exon	ENST00000251507	ENSG00000152061	RABGAP1L	hsa_circ_0015335	1	174637375	174702256	+
1:174699525|174752354	0	0	0	0	0	1.28966	0	0.429887	0.429887	0.635324	0.921644	exon	ENST00000251507	ENSG00000152061	RABGAP1L	---	---	---	---	---
1:174877392|174976182	0	2.62281	0	0	0	0	0.874269	0	-0.874269	0.339128	0.921644	exon	ENST00000469553,ENST00000465412	ENSG00000152061	RABGAP1L	---	---	---	---	---
1:175004614|175008706	2.54748	0	0	2.61944	2.03388	1.28966	0.849161	1.981	1.13184	0.603243	0.921644	exon	ENST00000613570,ENST00000473925,ENST00000367679,ENST00000405362	ENSG00000116161	CACYBP	hsa_circ_0015340	1	175004614	175008706	+
1:17580553|17588479	2.08091	1.83985	3.92074	2.97456	2.03388	0	2.61383	1.66948	-0.944352	0.418352	0.921644	exon	ENST00000375415,ENST00000361221	ENSG00000074964	ARHGEF10L	hsa_circ_0005562	1	17580553	17588479	+
5:154029489|154034967	7.31567	7.50447	7.20397	6.26742	7.09995	7.80403	7.34137	7.05714	-0.284235	0.642579	0.921644	exon	ENST00000522858,ENST00000523705,ENST00000351797,ENST00000520667,ENST00000520313,ENST00000522395	ENSG00000055147	FAM114A2	hsa_circ_0007773	5	154029489	154034967	-
1:175986943|176027688	0	0	0	0.652309	0	0	0	0.217436	0.217436	0.781429	0.921644	exon	ENST00000367669,ENST00000367666,ENST00000461830,ENST00000308769,ENST00000367667	ENSG00000143207	RFWD2	hsa_circ_0015352	1	175986943	176027688	-
1:175986943|176046324	0	0	0	1.09988	0	0	0	0.366626	0.366626	0.661625	0.921644	exon	ENST00000367669,ENST00000367666,ENST00000461830,ENST00000308769,ENST00000367667	ENSG00000143207	RFWD2	---	---	---	---	---
1:175986943|176116681	0	0	0	1.44098	0	0	0	0.480325	0.480325	0.5841	0.921644	exon	ENST00000367669,ENST00000367666,ENST00000308769,ENST00000367667	ENSG00000143207	RFWD2	---	---	---	---	---
1:17602127|17607977	0	0	0.873449	1.71665	0	0	0.29115	0.572217	0.281068	0.768855	0.921644	exon	ENST00000375415,ENST00000361221	ENSG00000074964	ARHGEF10L	hsa_circ_0005814	1	17602127	17607977	+
1:176027572|176046324	0	1.83985	3.9979	3.17049	3.3625	0	1.94592	2.17766	0.231746	0.957981	0.983054	exon	ENST00000367669,ENST00000367666,ENST00000461830,ENST00000308769,ENST00000367667	ENSG00000143207	RFWD2	hsa_circ_0015359	1	176027572	176046324	-
1:176027572|176085890	0	0	0	0	2.84602	0	0	0.948672	0.948672	0.330659	0.921644	exon	ENST00000367669,ENST00000367666,ENST00000308769,ENST00000367667	ENSG00000143207	RFWD2	---	---	---	---	---
1:176027572|176116681	0	0	2.36742	3.56827	0	3.47417	0.789141	2.34748	1.55834	0.382725	0.921644	exon	ENST00000367669,ENST00000367666,ENST00000308769,ENST00000367667	ENSG00000143207	RFWD2	hsa_circ_0015360	1	176027572	176116681	-
9:93471141|93498886	7.48133	7.60348	6.92654	7.58452	7.33934	7.2545	7.33712	7.39279	0.0556752	0.948086	0.983054	exon	ENST00000446420,ENST00000277165,ENST00000375389	ENSG00000048828	FAM120A	hsa_circ_0001875	9	93471141	93498886	+
1:108148279|108161293	7.53257	7.67807	6.79219	7.37195	6.92727	6.96861	7.33428	7.08928	-0.245002	0.314551	0.921644	exon	ENST00000370041,ENST00000264128,ENST00000565488	ENSG00000085491	SLC25A24	hsa_circ_0004270	1	108148279	108161293	-
1:176043186|176085890	2.08091	1.83985	2.36742	2.47857	0	3.47417	2.09606	1.98425	-0.111816	0.651275	0.921644	exon	ENST00000367669,ENST00000367666,ENST00000308769,ENST00000367667	ENSG00000143207	RFWD2	---	---	---	---	---
1:176043186|176116681	2.08091	0	0	1.09988	0	0	0.693638	0.366626	-0.327013	0.749014	0.921644	exon	ENST00000367669,ENST00000367666,ENST00000308769,ENST00000367667	ENSG00000143207	RFWD2	---	---	---	---	---
1:176043186|176136547	3.62148	3.1275	2.11375	3.49701	0	1.28966	2.95425	1.59556	-1.35869	0.511194	0.921644	exon	ENST00000367669,ENST00000367667	ENSG00000143207	RFWD2	---	---	---	---	---
1:176043186|176149074	0	0	0	0.652309	0	0	0	0.217436	0.217436	0.781429	0.921644	exon	ENST00000367669,ENST00000367666,ENST00000308769,ENST00000367667	ENSG00000143207	RFWD2	---	---	---	---	---
1:176081152|176116681	1.38702	0	0	0.652309	0	0	0.46234	0.217436	-0.244903	0.824865	0.938733	exon	ENST00000367669,ENST00000367666,ENST00000459744,ENST00000308769,ENST00000367667	ENSG00000143207	RFWD2	hsa_circ_0015365	1	176081152	176116681	-
1:176081152|176135086	0	0	0	0	0	1.28966	0	0.429887	0.429887	0.635324	0.921644	exon	ENST00000367669,ENST00000367666,ENST00000308769,ENST00000367667	ENSG00000143207	RFWD2	---	---	---	---	---
3:138570318|138571356	7.38702	7.88115	6.7257	7.24177	7.72427	7.32119	7.33129	7.42907	0.0977865	0.996551	0.998767	exon	ENST00000474781,ENST00000484888,ENST00000481834,ENST00000478673,ENST00000464035,ENST00000462419,ENST00000264982	ENSG00000114107	CEP70	hsa_circ_0002468	3	138570318	138571356	-
1:176081152|176149074	0	0	2.58309	0	0	1.28966	0.861031	0.429887	-0.431143	0.599425	0.921644	exon	ENST00000367669,ENST00000367666,ENST00000308769,ENST00000367667	ENSG00000143207	RFWD2	hsa_circ_0015366	1	176081152	176149074	-
1:176081152|176163891	2.08091	0	0.873449	1.71665	0	0	0.984788	0.572217	-0.412571	0.813138	0.935878	exon	ENST00000367669,ENST00000367666,ENST00000308769	ENSG00000143207	RFWD2	hsa_circ_0015367	1	176081152	176163891	-
1:176081152|176184692	0	0	0	0	2.03388	0	0	0.677962	0.677962	0.50093	0.921644	exon	ENST00000367669,ENST00000308769,ENST00000367667	ENSG00000143207	RFWD2	hsa_circ_0015369	1	176081152	176184692	-
1:176085776|176136547	0	0	0	0.652309	0	0	0	0.217436	0.217436	0.781429	0.921644	exon	ENST00000367669,ENST00000367667	ENSG00000143207	RFWD2	---	---	---	---	---
1:176116624|176136547	2.89947	1.83985	0	0	2.84602	0	1.57977	0.948672	-0.631102	0.821153	0.938733	exon	ENST00000367669,ENST00000367667	ENSG00000143207	RFWD2	hsa_circ_0015373	1	176116624	176136547	-
1:176116624|176149074	0	0	2.36742	0	2.03388	2.76104	0.789141	1.59831	0.809166	0.739764	0.921644	exon	ENST00000367669,ENST00000367666,ENST00000498306,ENST00000308769,ENST00000367667	ENSG00000143207	RFWD2	hsa_circ_0015374	1	176116624	176149074	-
1:176116624|176162988	0	0	0	1.09988	0	0	0	0.366626	0.366626	0.661625	0.921644	exon	ENST00000367669,ENST00000367666,ENST00000498306,ENST00000308769	ENSG00000143207	RFWD2	---	---	---	---	---
1:176116624|176163891	2.54748	1.83985	0	1.44098	0	1.28966	1.46245	0.910213	-0.552233	0.616867	0.921644	exon	ENST00000367669,ENST00000367666,ENST00000498306,ENST00000308769	ENSG00000143207	RFWD2	---	---	---	---	---
1:176116624|176176007	1.38702	1.83985	0	0.652309	0	0	1.07562	0.217436	-0.858188	0.520005	0.921644	exon	ENST00000367669,ENST00000367666,ENST00000498306,ENST00000308769,ENST00000367667	ENSG00000143207	RFWD2	---	---	---	---	---
1:176135010|176162988	0	0	1.80575	0	0	0	0.601917	0	-0.601917	0.475406	0.921644	exon	ENST00000367669,ENST00000491600,ENST00000367666,ENST00000498306,ENST00000474194,ENST00000308769	ENSG00000143207	RFWD2	---	---	---	---	---
18:9583117|9595102	7.49431	7.42007	7.05847	7.60585	6.9635	7.35977	7.32428	7.30971	-0.0145749	0.965315	0.986573	exon	ENST00000400556,ENST00000285124,ENST00000400555	ENSG00000154845	PPP4R1	hsa_circ_0009022	18	9583117	9595102	-
1:176135010|176184692	1.38702	1.83985	0.873449	1.09988	0	0	1.36677	0.366626	-1.00015	0.529884	0.921644	exon	ENST00000367669,ENST00000491600,ENST00000498306,ENST00000474194,ENST00000308769,ENST00000367667	ENSG00000143207	RFWD2	---	---	---	---	---
1:176136488|176176007	0	0	0.873449	1.71665	0	0	0.29115	0.572217	0.281068	0.768855	0.921644	exon	ENST00000367669,ENST00000491600,ENST00000367667	ENSG00000143207	RFWD2	---	---	---	---	---
1:176149006|176163891	0	0	0	1.44098	0	0	0	0.480325	0.480325	0.5841	0.921644	exon	ENST00000367669,ENST00000491600,ENST00000367666,ENST00000498306,ENST00000474194,ENST00000308769	ENSG00000143207	RFWD2	hsa_circ_0015376	1	176149006	176163891	-
4:86764593|86767976	7.31567	6.87145	7.76925	7.30572	7.88402	7.35977	7.31879	7.5165	0.19771	0.722915	0.921644	exon	ENST00000316707,ENST00000511467,ENST00000427191,ENST00000436978,ENST00000411767	ENSG00000163629	PTPN13	hsa_circ_0007948	4	86764593	86767976	+
1:176149006|176184692	0	2.62281	2.77067	2.61944	0	2.41525	1.79783	1.67823	-0.119595	0.923783	0.977053	exon	ENST00000367669,ENST00000491600,ENST00000498306,ENST00000474194,ENST00000308769,ENST00000367667	ENSG00000143207	RFWD2	hsa_circ_0004436	1	176149006	176184692	-
1:176162869|176184692	3.1822	0	3.08548	2.86562	4.99777	3.94926	2.08923	3.93755	1.84833	0.146505	0.921644	exon	ENST00000367669,ENST00000491600,ENST00000498306,ENST00000474194,ENST00000308769	ENSG00000143207	RFWD2	hsa_circ_0009064	1	176162869	176184692	-
1:176175910|176184692	0	0	0	0	2.03388	0	0	0.677962	0.677962	0.50093	0.921644	exon	ENST00000367669,ENST00000491600,ENST00000498306,ENST00000308769,ENST00000367667	ENSG00000143207	RFWD2	hsa_circ_0015379	1	176175910	176184692	-
1:17627330|17640302	0	0	0	1.09988	0	0	0	0.366626	0.366626	0.661625	0.921644	exon	ENST00000375415,ENST00000469726,ENST00000361221,ENST00000375408,ENST00000167825	ENSG00000074964	ARHGEF10L	---	---	---	---	---
1:176555407|176557241	1.38702	0	0	0	0	0	0.46234	0	-0.46234	0.58606	0.921644	exon	ENST00000367662,ENST00000367661	ENSG00000116183	PAPPA2	---	---	---	---	---
1:176868844|176894830	0	1.83985	0	0	0	0	0.613285	0	-0.613285	0.494453	0.921644	exon	ENST00000361833,ENST00000367657,ENST00000424564	ENSG00000152092	ASTN1	---	---	---	---	---
1:176934152|176965237	0	0	0	0.652309	0	0	0	0.217436	0.217436	0.781429	0.921644	exon	ENST00000361833,ENST00000367657,ENST00000424564	ENSG00000152092	ASTN1	---	---	---	---	---
1:177971396|177985062	1.38702	0	0	0	0	0	0.46234	0	-0.46234	0.58606	0.921644	exon	ENST00000354921	ENSG00000254154	RP4-798P15.3	---	---	---	---	---
1:178123056|178125501	2.54748	0	3.08548	0	0	0	1.87765	0	-1.87765	0.129003	0.921644	exon	ENST00000465723	ENSG00000075391	RASAL2	hsa_circ_0002061	1	178123056	178125501	+
1:178283564|178390206	0	1.83985	0	0	0	0	0.613285	0	-0.613285	0.494453	0.921644	exon	ENST00000367649	ENSG00000075391	RASAL2	---	---	---	---	---
1:178283564|178454648	0	0	0	0	0	1.95955	0	0.653185	0.653185	0.485036	0.921644	exon	ENST00000367649	ENSG00000075391	RASAL2	hsa_circ_0015392	1	178283564	178454648	+
1:178441549|178443229	0	1.83985	0	0	0	0	0.613285	0	-0.613285	0.494453	0.921644	exon	ENST00000462775,ENST00000367649	ENSG00000075391	RASAL2	---	---	---	---	---
1:178456721|178467421	0	0	0	0	0	1.28966	0	0.429887	0.429887	0.635324	0.921644	exon	ENST00000433130,ENST00000462775,ENST00000367649	ENSG00000075391	RASAL2	---	---	---	---	---
1:178776682|178811404	1.38702	0	0	0	0	0	0.46234	0	-0.46234	0.58606	0.921644	exon	ENST00000367634,ENST00000495034,ENST00000367635,ENST00000324778	ENSG00000116191	RALGPS2	---	---	---	---	---
1:178808045|178821704	0	1.83985	0	0	0	0	0.613285	0	-0.613285	0.494453	0.921644	exon	ENST00000367634,ENST00000495034,ENST00000367635,ENST00000324778	ENSG00000116191	RALGPS2	---	---	---	---	---
1:178852683|178853787	0	1.83985	0	0	0	0	0.613285	0	-0.613285	0.494453	0.921644	exon	ENST00000234816,ENST00000367629	ENSG00000116194	ANGPTL1	---	---	---	---	---
1:178877498|178886120	0	1.83985	0	0	0	0	0.613285	0	-0.613285	0.494453	0.921644	exon	ENST00000367634,ENST00000367635	ENSG00000116191	RALGPS2	---	---	---	---	---
1:178877498|178894024	0	0	0	0	2.03388	0	0	0.677962	0.677962	0.50093	0.921644	exon	ENST00000367634,ENST00000367635	ENSG00000116191	RALGPS2	---	---	---	---	---
1:178883466|178886120	1.38702	0	0.873449	0	0	0	0.753489	0	-0.753489	0.476856	0.921644	exon	ENST00000367634,ENST00000477383,ENST00000367635	ENSG00000116191	RALGPS2	---	---	---	---	---
1:178885969|178906867	0	0	0	0	0	1.95955	0	0.653185	0.653185	0.485036	0.921644	exon	ENST00000367634,ENST00000367635	ENSG00000116191	RALGPS2	---	---	---	---	---
1:178893919|178906867	2.08091	0	0	0	0	0	0.693638	0	-0.693638	0.429293	0.921644	exon	ENST00000478871,ENST00000367634,ENST00000367635	ENSG00000116191	RALGPS2	---	---	---	---	---
1:1789053|1817875	0	0	1.80575	0	0	0	0.601917	0	-0.601917	0.475406	0.921644	exon	ENST00000610897,ENST00000378609	ENSG00000078369	GNB1	hsa_circ_0009341	1	1789053	1817875	-
1:1790395|1793311	0	0	0	1.94801	0	0	0	0.649335	0.649335	0.47295	0.921644	exon	ENST00000471354,ENST00000610897,ENST00000378609,ENST00000461893,ENST00000615252	ENSG00000078369	GNB1	hsa_circ_0009344	1	1790395	1793311	-
1:1790395|1817875	1.38702	0	0	0	0	0	0.46234	0	-0.46234	0.58606	0.921644	exon	ENST00000471354,ENST00000610897,ENST00000378609	ENSG00000078369	GNB1	hsa_circ_0009346	1	1790395	1817875	-
1:179043715|179050365	0	0	0	1.44098	0	0	0	0.480325	0.480325	0.5841	0.921644	exon	ENST00000263733	ENSG00000116199	FAM20B	---	---	---	---	---
4:82878730|82881940	7.2711	7.56469	7.03119	6.73824	7.09995	7.49301	7.28899	7.1104	-0.178593	0.465471	0.921644	exon	ENST00000311785,ENST00000503058,ENST00000395310,ENST00000514326,ENST00000505984,ENST00000348405,ENST00000506497,ENST00000508502,ENST00000513858,ENST00000513323,ENST00000507340,ENST00000508479,ENST00000500777,ENST00000436790	ENSG00000138674	SEC31A	hsa_circ_0006618	4	82878730	82881940	-
1:179043715|179064496	2.08091	0	0	0	0	1.28966	0.693638	0.429887	-0.263751	0.776051	0.921644	exon	ENST00000263733	ENSG00000116199	FAM20B	hsa_circ_0015414	1	179043715	179064496	+
1:179043715|179066859	0	1.83985	0	0	0	0	0.613285	0	-0.613285	0.494453	0.921644	exon	ENST00000263733	ENSG00000116199	FAM20B	---	---	---	---	---
1:179050279|179064496	0	0	0	1.94801	0	1.95955	0	1.30252	1.30252	0.257802	0.921644	exon	ENST00000263733	ENSG00000116199	FAM20B	---	---	---	---	---
1:179050279|179066859	0	2.62281	0	2.14734	2.03388	0	0.874269	1.39374	0.519471	0.894985	0.967527	exon	ENST00000263733	ENSG00000116199	FAM20B	---	---	---	---	---
1:179054529|179066859	3.4185	1.83985	0	0	0	0	1.75278	0	-1.75278	0.197389	0.921644	exon	ENST00000263733	ENSG00000116199	FAM20B	hsa_circ_0015417	1	179054529	179066859	+
3:31576396|31580096	6.72791	7.28341	7.84951	6.90581	7.59166	8.18679	7.28694	7.56142	0.274475	0.615124	0.921644	exon	ENST00000295770,ENST00000453168,ENST00000423527,ENST00000462235	ENSG00000163527	STT3B	hsa_circ_0001278	3	31576396	31580096	+
1:179063927|179066859	0	2.62281	0	2.47857	0	0	0.874269	0.826191	-0.0480787	0.985831	0.993578	exon	ENST00000263733	ENSG00000116199	FAM20B	---	---	---	---	---
1:179085628|179088089	2.08091	0	0	1.09988	0	0	0.693638	0.366626	-0.327013	0.749014	0.921644	exon	ENST00000352445,ENST00000367627,ENST00000447595	ENSG00000186283	TOR3A	---	---	---	---	---
1:179085628|179094217	0	0	0	1.09988	0	0	0	0.366626	0.366626	0.661625	0.921644	exon	ENST00000352445,ENST00000367627	ENSG00000186283	TOR3A	---	---	---	---	---
1:179109208|179133374	0	0	0	1.44098	0	0	0	0.480325	0.480325	0.5841	0.921644	exon	ENST00000344730,ENST00000512653,ENST00000511413,ENST00000502732	ENSG00000143322	ABL2	---	---	---	---	---
1:179110282|179112398	0	0	0	0	2.84602	0	0	0.948672	0.948672	0.330659	0.921644	exon	ENST00000367623,ENST00000344730,ENST00000504405,ENST00000512653,ENST00000507173,ENST00000511413,ENST00000502732	ENSG00000143322	ABL2	hsa_circ_0003964	1	179110282	179112398	-
1:179112309|179117516	0	0	0	0	3.3625	0	0	1.12083	1.12083	0.271092	0.921644	exon	ENST00000367623,ENST00000344730,ENST00000504405,ENST00000512653,ENST00000507173,ENST00000511413,ENST00000392043,ENST00000502732	ENSG00000143322	ABL2	hsa_circ_0003595	1	179112309	179117516	-
1:179112309|179121867	0	1.83985	2.58309	0	0	0	1.47432	0	-1.47432	0.152272	0.921644	exon	ENST00000367623,ENST00000344730,ENST00000504405,ENST00000512653,ENST00000507173,ENST00000511413,ENST00000392043,ENST00000502732	ENSG00000143322	ABL2	---	---	---	---	---
1:179114878|179121867	0	0	1.41363	1.09988	0	0	0.471212	0.366626	-0.104586	0.926801	0.977053	exon	ENST00000367623,ENST00000344730,ENST00000504405,ENST00000512653,ENST00000507173,ENST00000511413,ENST00000392043,ENST00000502732	ENSG00000143322	ABL2	---	---	---	---	---
1:179117332|179118764	2.54748	1.83985	1.80575	0	0	0	2.06436	0	-2.06436	0.051214	0.921644	exon	ENST00000504324,ENST00000367623,ENST00000509520,ENST00000344730,ENST00000504405,ENST00000512653,ENST00000507173,ENST00000511413,ENST00000392043,ENST00000502732	ENSG00000143322	ABL2	hsa_circ_0015427	1	179117332	179118764	-
1:179117332|179120274	0	0	0	1.71665	0	0	0	0.572217	0.572217	0.523576	0.921644	exon	ENST00000504324,ENST00000367623,ENST00000509520,ENST00000344730,ENST00000504405,ENST00000512653,ENST00000507173,ENST00000511413,ENST00000392043,ENST00000502732	ENSG00000143322	ABL2	---	---	---	---	---
1:179117332|179133374	2.08091	0	0	0	0	0	0.693638	0	-0.693638	0.429293	0.921644	exon	ENST00000504324,ENST00000344730,ENST00000512653,ENST00000511413,ENST00000502732	ENSG00000143322	ABL2	---	---	---	---	---
1:179118587|179121867	1.38702	2.62281	2.58309	3.56827	0	2.76104	2.19764	2.10977	-0.0878705	0.625788	0.921644	exon	ENST00000504324,ENST00000367623,ENST00000509520,ENST00000344730,ENST00000504405,ENST00000512653,ENST00000507173,ENST00000511413,ENST00000392043,ENST00000502732	ENSG00000143322	ABL2	---	---	---	---	---
1:155438327|155459898	7.37303	6.93366	7.53045	7.58882	7.03334	7.63608	7.27905	7.41941	0.140367	0.677448	0.921644	exon	ENST00000368346,ENST00000392403	ENSG00000116539	ASH1L	hsa_circ_0003247	1	155438327	155459898	-
1:179121595|179133374	0	1.83985	0.873449	0	0	0	0.904434	0	-0.904434	0.404147	0.921644	exon	ENST00000504324,ENST00000344730,ENST00000512653,ENST00000511413,ENST00000502732	ENSG00000143322	ABL2	hsa_circ_0015432	1	179121595	179133374	-
1:179131311|179133374	2.54748	2.62281	0	2.32244	4.2906	1.28966	1.72343	2.63423	0.910804	0.45011	0.921644	exon	ENST00000504324,ENST00000344730,ENST00000512653,ENST00000511413,ENST00000502732	ENSG00000143322	ABL2	hsa_circ_0004996	1	179131311	179133374	-
1:179302677|179335657	0	1.83985	1.80575	0	0	0	1.2152	0	-1.2152	0.281573	0.921644	exon	ENST00000540564,ENST00000367619,ENST00000426956	ENSG00000057252	SOAT1	---	---	---	---	---
1:179302677|179337896	1.38702	0	2.36742	1.09988	0	0	1.25148	0.366626	-0.884855	0.480706	0.921644	exon	ENST00000540564,ENST00000367619,ENST00000426956	ENSG00000057252	SOAT1	hsa_circ_0005271	1	179302677	179337896	+
1:179302677|179343635	1.38702	0	0	0	0	0	0.46234	0	-0.46234	0.58606	0.921644	exon	ENST00000540564,ENST00000367619	ENSG00000057252	SOAT1	hsa_circ_0015436	1	179302677	179343635	+
1:1793245|1815862	0	0	0	0	0	2.41525	0	0.805084	0.805084	0.395572	0.921644	exon	ENST00000471354,ENST00000434686,ENST00000610897,ENST00000378609,ENST00000439272	ENSG00000078369	GNB1	---	---	---	---	---
1:1793245|1817875	2.08091	0	1.41363	1.94801	0	0	1.16485	0.649335	-0.515514	0.807003	0.93419	exon	ENST00000471354,ENST00000434686,ENST00000610897,ENST00000378609	ENSG00000078369	GNB1	hsa_circ_0009349	1	1793245	1817875	-
1:179335506|179341310	0	1.83985	0	3.07585	2.84602	2.41525	0.613285	2.77904	2.16576	0.0551192	0.921644	exon	ENST00000540564,ENST00000539888,ENST00000367619,ENST00000426956	ENSG00000057252	SOAT1	hsa_circ_0015437	1	179335506	179341310	+
1:179335506|179343635	2.89947	1.83985	2.93665	1.71665	2.03388	0	2.55866	1.25018	-1.30848	0.230873	0.921644	exon	ENST00000540564,ENST00000539888,ENST00000367619	ENSG00000057252	SOAT1	---	---	---	---	---
14:88726541|88754671	7.455	6.62979	7.61248	7.05592	7.03334	6.45422	7.23242	6.84783	-0.3846	0.116107	0.921644	exon	ENST00000554922,ENST00000380664	ENSG00000165521	EML5	hsa_circ_0032877	14	88726541	88754671	-
1:179337837|179342943	2.89947	0	1.80575	2.32244	2.03388	0	1.56841	1.45211	-0.116298	0.824368	0.938733	exon	ENST00000540564,ENST00000539888,ENST00000367619	ENSG00000057252	SOAT1	hsa_circ_0007700	1	179337837	179342943	+
1:179337837|179343635	1.38702	0	0	0	0	0	0.46234	0	-0.46234	0.58606	0.921644	exon	ENST00000540564,ENST00000539888,ENST00000367619	ENSG00000057252	SOAT1	hsa_circ_0015439	1	179337837	179343635	+
1:179337837|179348942	0	0	0	0	0	1.28966	0	0.429887	0.429887	0.635324	0.921644	exon	ENST00000540564,ENST00000539888,ENST00000367619	ENSG00000057252	SOAT1	---	---	---	---	---
1:179337837|179350431	0	1.83985	0	0	2.03388	0	0.613285	0.677962	0.0646769	0.969668	0.98778	exon	ENST00000540564,ENST00000539888,ENST00000367619	ENSG00000057252	SOAT1	hsa_circ_0015440	1	179337837	179350431	+
1:179339438|179342943	0	0	0	0	3.3625	1.28966	0	1.55072	1.55072	0.24595	0.921644	exon	ENST00000540564,ENST00000539888,ENST00000367619	ENSG00000057252	SOAT1	hsa_circ_0015442	1	179339438	179342943	+
1:179339438|179348942	0	1.83985	0	0	0	0	0.613285	0	-0.613285	0.494453	0.921644	exon	ENST00000540564,ENST00000539888,ENST00000367619	ENSG00000057252	SOAT1	hsa_circ_0015443	1	179339438	179348942	+
1:179341028|179342943	0	0	2.36742	2.32244	2.03388	1.28966	0.789141	1.882	1.09285	0.661901	0.921644	exon	ENST00000540564,ENST00000539888,ENST00000367619	ENSG00000057252	SOAT1	hsa_circ_0015445	1	179341028	179342943	+
1:179341028|179343635	0	2.62281	2.36742	3.07585	3.3625	2.41525	1.66341	2.9512	1.28779	0.324823	0.921644	exon	ENST00000540564,ENST00000539888,ENST00000367619	ENSG00000057252	SOAT1	hsa_circ_0015446	1	179341028	179343635	+
1:179341028|179348942	1.38702	0	0	0.652309	0	0	0.46234	0.217436	-0.244903	0.824865	0.938733	exon	ENST00000540564,ENST00000539888,ENST00000367619	ENSG00000057252	SOAT1	hsa_circ_0015447	1	179341028	179348942	+
1:179341028|179350431	0	0	1.41363	0	0	0	0.471212	0	-0.471212	0.566201	0.921644	exon	ENST00000540564,ENST00000539888,ENST00000367619	ENSG00000057252	SOAT1	hsa_circ_0015448	1	179341028	179350431	+
1:179341028|179351462	0	0	1.80575	0	0	0	0.601917	0	-0.601917	0.475406	0.921644	exon	ENST00000540564,ENST00000539888,ENST00000367619	ENSG00000057252	SOAT1	---	---	---	---	---
1:179342114|179345076	0	0	0.873449	0	0	0	0.29115	0	-0.29115	0.69286	0.921644	exon	ENST00000540564,ENST00000539888,ENST00000367619	ENSG00000057252	SOAT1	---	---	---	---	---
1:179343590|179350431	0	0	1.41363	0	0	0	0.471212	0	-0.471212	0.566201	0.921644	exon	ENST00000540564,ENST00000539888,ENST00000367619	ENSG00000057252	SOAT1	---	---	---	---	---
1:179347600|179350431	0	1.83985	1.41363	1.09988	3.3625	3.03976	1.0845	2.50071	1.41621	0.173805	0.921644	exon	ENST00000540564,ENST00000539888,ENST00000367619	ENSG00000057252	SOAT1	hsa_circ_0015454	1	179347600	179350431	+
1:179378637|179395202	0	0	0	0.652309	0	0	0	0.217436	0.217436	0.781429	0.921644	exon	ENST00000434088,ENST00000461179,ENST00000367618,ENST00000617277,ENST00000511157	ENSG00000162779	AXDND1	---	---	---	---	---
1:179382700|179411266	0	2.62281	0	0	0	0	0.874269	0	-0.874269	0.339128	0.921644	exon	ENST00000434088,ENST00000461179,ENST00000367618,ENST00000617277,ENST00000511157	ENSG00000162779	AXDND1	---	---	---	---	---
1:179662104|179669404	0	0	0	1.09988	0	0	0	0.366626	0.366626	0.661625	0.921644	exon	ENST00000444136,ENST00000417329,ENST00000294848,ENST00000367614	ENSG00000162782	TDRD5	---	---	---	---	---
1:179865436|179865854	1.38702	0	0	0	0	0	0.46234	0	-0.46234	0.58606	0.921644	exon	ENST00000482587,ENST00000495650,ENST00000609928	ENSG00000169905	TOR1AIP2	---	---	---	---	---
1:179889310|179908673	2.54748	0	0	1.09988	2.03388	0	0.849161	1.04459	0.195426	0.900015	0.968118	exon	ENST00000271583,ENST00000528443	ENSG00000143337	TOR1AIP1	---	---	---	---	---
1:179889310|179914054	3.95777	0	0	2.14734	4.50242	2.41525	1.31926	3.02167	1.70241	0.685359	0.921644	exon	ENST00000271583,ENST00000528443	ENSG00000143337	TOR1AIP1	---	---	---	---	---
1:179889313|179908673	0	1.83985	0	0	0	0	0.613285	0	-0.613285	0.494453	0.921644	exon	ENST00000527391,ENST00000271583,ENST00000606911,ENST00000435319,ENST00000474875,ENST00000531630,ENST00000528443	ENSG00000143337	TOR1AIP1	---	---	---	---	---
1:179889313|179914054	1.38702	0	0	0	0	0	0.46234	0	-0.46234	0.58606	0.921644	exon	ENST00000527391,ENST00000271583,ENST00000606911,ENST00000435319,ENST00000474875,ENST00000528443	ENSG00000143337	TOR1AIP1	---	---	---	---	---
1:179900126|179907864	0	1.83985	0.873449	0	0	0	0.904434	0	-0.904434	0.404147	0.921644	exon	ENST00000527391,ENST00000271583,ENST00000524653,ENST00000606911,ENST00000435319,ENST00000474875,ENST00000528443	ENSG00000143337	TOR1AIP1	hsa_circ_0015460	1	179900126	179907864	+
1:179900126|179908673	3.7994	1.83985	2.11375	1.94801	0	1.28966	2.58433	1.07922	-1.50511	0.152444	0.921644	exon	ENST00000527391,ENST00000271583,ENST00000606911,ENST00000435319,ENST00000474875,ENST00000528443	ENSG00000143337	TOR1AIP1	---	---	---	---	---
1:179900126|179914054	3.1822	0	1.80575	3.49701	0	1.28966	1.66265	1.59556	-0.0670926	0.916433	0.975419	exon	ENST00000527391,ENST00000271583,ENST00000606911,ENST00000435319,ENST00000474875,ENST00000528443	ENSG00000143337	TOR1AIP1	---	---	---	---	---
1:179901302|179908673	1.38702	0	0	0.652309	0	0	0.46234	0.217436	-0.244903	0.824865	0.938733	exon	ENST00000527391,ENST00000271583,ENST00000606911,ENST00000435319,ENST00000474875,ENST00000531630,ENST00000528443	ENSG00000143337	TOR1AIP1	---	---	---	---	---
1:179901302|179914054	0	0	0	0	2.03388	0	0	0.677962	0.677962	0.50093	0.921644	exon	ENST00000527391,ENST00000271583,ENST00000606911,ENST00000435319,ENST00000474875,ENST00000528443	ENSG00000143337	TOR1AIP1	---	---	---	---	---
1:179986169|179990621	2.08091	0	0	0	0	0	0.693638	0	-0.693638	0.429293	0.921644	exon	ENST00000367607	ENSG00000135837	CEP350	---	---	---	---	---
3:3777725|3789074	7.2711	7.5449	6.87634	7.62269	8.20472	7.70762	7.23078	7.84501	0.614234	0.0231904	0.921644	exon	ENST00000470751	ENSG00000144455	SUMF1	hsa_circ_0003910	3	3777725	3789074	-
1:236806144|236816543	7.09478	7.28341	7.29086	7.2741	7.06703	7.15564	7.22302	7.16559	-0.0574243	0.715883	0.921644	exon	ENST00000366577,ENST00000463959,ENST00000535889	ENSG00000116984	MTR	hsa_circ_0004039	1	236806144	236816543	+
1:179986169|180003287	0	0	0	0	0	1.28966	0	0.429887	0.429887	0.635324	0.921644	exon	ENST00000367607	ENSG00000135837	CEP350	---	---	---	---	---
15:41696075|41699159	7.65325	7.10566	6.89663	6.83533	6.45387	6.47779	7.21851	6.589	-0.629513	0.0195028	0.921644	exon	ENST00000566718,ENST00000545763,ENST00000563576,ENST00000566586,ENST00000570161,ENST00000219905	ENSG00000174197	MGA	hsa_circ_0000592	15	41696075	41699159	+
1:179990507|180006567	2.08091	0	0	1.71665	0	0	0.693638	0.572217	-0.121421	0.91126	0.972651	exon	ENST00000367607	ENSG00000135837	CEP350	hsa_circ_0015467	1	179990507	180006567	+
1:179992062|179997175	0	0	0	1.44098	0	0	0	0.480325	0.480325	0.5841	0.921644	exon	ENST00000367607	ENSG00000135837	CEP350	---	---	---	---	---
1:179996553|179997175	3.4185	2.62281	1.80575	2.97456	0	1.95955	2.61568	1.64471	-0.970979	0.577613	0.921644	exon	ENST00000367607	ENSG00000135837	CEP350	---	---	---	---	---
5:56864734|56865977	6.70576	7.48383	7.43656	7.15183	7.86499	7.98768	7.20872	7.66817	0.459452	0.226299	0.921644	exon	ENST00000399503	ENSG00000095015	MAP3K1	hsa_circ_0001485	5	56864734	56865977	+
1:180003174|180037089	0	0	0	0	2.84602	0	0	0.948672	0.948672	0.330659	0.921644	exon	ENST00000367607	ENSG00000135837	CEP350	---	---	---	---	---
1:180019949|180021009	2.08091	0	0	0	2.03388	1.95955	0.693638	1.33115	0.637508	0.771508	0.921644	exon	ENST00000367607	ENSG00000135837	CEP350	---	---	---	---	---
1:180019949|180022848	1.38702	0	0	0	0	0	0.46234	0	-0.46234	0.58606	0.921644	exon	ENST00000367607	ENSG00000135837	CEP350	hsa_circ_0015482	1	180019949	180022848	+
1:180024419|180037089	0	0	0	1.09988	2.03388	0	0	1.04459	1.04459	0.386055	0.921644	exon	ENST00000367607	ENSG00000135837	CEP350	---	---	---	---	---
1:180031320|180048705	2.08091	0	0	1.44098	2.84602	0	0.693638	1.429	0.735359	0.633206	0.921644	exon	ENST00000367607	ENSG00000135837	CEP350	---	---	---	---	---
1:180041138|180044173	1.38702	0	0	0	2.03388	0	0.46234	0.677962	0.215622	0.858511	0.949777	exon	ENST00000367607	ENSG00000135837	CEP350	hsa_circ_0015484	1	180041138	180044173	+
1:59339958|59378837	6.9515	7.91238	6.7482	7.47753	8.11093	7.73723	7.20403	7.77523	0.571198	0.227258	0.921644	exon	ENST00000430447,ENST00000413489,ENST00000303721,ENST00000634606,ENST00000634364,ENST00000634399,ENST00000371218	ENSG00000172456	FGGY	hsa_circ_0006633	1	59339958	59378837	+
1:180041138|180053166	0	0	2.36742	0	0	0	0.789141	0	-0.789141	0.368163	0.921644	exon	ENST00000367607	ENSG00000135837	CEP350	---	---	---	---	---
1:180041138|180054502	0	1.83985	0	0	2.03388	0	0.613285	0.677962	0.0646769	0.969668	0.98778	exon	ENST00000367607	ENSG00000135837	CEP350	---	---	---	---	---
1:180041138|180065272	0	0	0	2.74778	0	0	0	0.915926	0.915926	0.308296	0.921644	exon	ENST00000367607	ENSG00000135837	CEP350	hsa_circ_0015486	1	180041138	180065272	+
1:180044051|180053934	0	0	0	0.652309	0	0	0	0.217436	0.217436	0.781429	0.921644	exon	ENST00000367607	ENSG00000135837	CEP350	---	---	---	---	---
1:180048536|180053166	1.38702	0	0	0	0	0	0.46234	0	-0.46234	0.58606	0.921644	exon	ENST00000367607,ENST00000418229	ENSG00000135837	CEP350	---	---	---	---	---
1:180052970|180065272	0	2.62281	0	0.652309	0	0	0.874269	0.217436	-0.656833	0.487237	0.921644	exon	ENST00000367607	ENSG00000135837	CEP350	---	---	---	---	---
1:180062220|180065272	0	1.83985	2.58309	2.32244	0	0	1.47432	0.774146	-0.700169	0.721711	0.921644	exon	ENST00000367607	ENSG00000135837	CEP350	hsa_circ_0015489	1	180062220	180065272	+
1:180062220|180075221	0	0	0	0	0	2.41525	0	0.805084	0.805084	0.395572	0.921644	exon	ENST00000367607	ENSG00000135837	CEP350	---	---	---	---	---
1:180062220|180084178	0	1.83985	0	0.652309	0	0	0.613285	0.217436	-0.395848	0.717705	0.921644	exon	ENST00000367607	ENSG00000135837	CEP350	---	---	---	---	---
1:180075022|180078674	0	0	0	0.652309	0	0	0	0.217436	0.217436	0.781429	0.921644	exon	ENST00000429851,ENST00000367607	ENSG00000135837	CEP350	---	---	---	---	---
1:180075022|180080661	0	0	0	0	0	1.28966	0	0.429887	0.429887	0.635324	0.921644	exon	ENST00000429851,ENST00000367607	ENSG00000135837	CEP350	hsa_circ_0015490	1	180075022	180080661	+
1:180075022|180084178	1.38702	2.62281	1.80575	2.32244	0	1.28966	1.93853	1.20403	-0.734492	0.719411	0.921644	exon	ENST00000429851,ENST00000367607	ENSG00000135837	CEP350	hsa_circ_0007652	1	180075022	180084178	+
1:180084018|180087717	0	0	0	0.652309	0	0	0	0.217436	0.217436	0.781429	0.921644	exon	ENST00000429851,ENST00000367607	ENSG00000135837	CEP350	---	---	---	---	---
1:180084018|180090796	0	2.62281	0	0	0	0	0.874269	0	-0.874269	0.339128	0.921644	exon	ENST00000429851,ENST00000367607	ENSG00000135837	CEP350	---	---	---	---	---
1:180186053|180189674	0	0	0	0	2.84602	0	0	0.948672	0.948672	0.330659	0.921644	exon	ENST00000367600,ENST00000392029,ENST00000367602	ENSG00000116260	QSOX1	---	---	---	---	---
1:180281306|180288517	0	1.83985	1.41363	1.09988	0	0	1.0845	0.366626	-0.717871	0.627247	0.921644	exon	ENST00000496993	ENSG00000230124	ACBD6	---	---	---	---	---
1:180314692|180430262	0	0	0	0.652309	0	0	0	0.217436	0.217436	0.781429	0.921644	exon	ENST00000496993,ENST00000367595	ENSG00000230124	ACBD6	---	---	---	---	---
1:180397516|180413471	4.23029	2.62281	0	3.07585	0	3.03976	2.28437	2.03854	-0.245829	0.772316	0.921644	exon	ENST00000496993,ENST00000367595	ENSG00000230124	ACBD6	hsa_circ_0009175	1	180397516	180413471	-
1:180397516|180430262	1.38702	1.83985	2.36742	2.32244	0	0	1.86477	0.774146	-1.09062	0.646992	0.921644	exon	ENST00000496993,ENST00000367595	ENSG00000230124	ACBD6	hsa_circ_0000164	1	180397516	180430262	-
1:180397516|180495525	0	3.1275	0	0	0	2.41525	1.0425	0.805084	-0.237417	0.831051	0.941209	exon	ENST00000367595	ENSG00000230124	ACBD6	hsa_circ_0015508	1	180397516	180495525	-
1:1804419|1806538	0	0	0	0	0	1.28966	0	0.429887	0.429887	0.635324	0.921644	exon	ENST00000471354,ENST00000434686,ENST00000610897,ENST00000378609,ENST00000439272,ENST00000615252	ENSG00000078369	GNB1	hsa_circ_0000007	1	1804419	1806538	-
1:1804419|1815862	0	1.83985	0.873449	1.94801	0	1.95955	0.904434	1.30252	0.398086	0.706239	0.921644	exon	ENST00000471354,ENST00000434686,ENST00000610897,ENST00000378609,ENST00000439272	ENSG00000078369	GNB1	hsa_circ_0009352	1	1804419	1815862	-
18:58934433|58953799	7.46823	6.90289	7.22819	7.2634	7.03334	7.12611	7.19977	7.14095	-0.0588205	0.665432	0.921644	exon	ENST00000336078,ENST00000591808,ENST00000591230,ENST00000589288,ENST00000591083	ENSG00000074657	ZNF532	hsa_circ_0003423	18	58934433	58953799	+
1:1804419|1825499	2.08091	1.83985	1.41363	2.14734	0	1.28966	1.77813	1.14567	-0.632468	0.791654	0.928797	exon	ENST00000434686,ENST00000610897,ENST00000378609,ENST00000439272,ENST00000615252	ENSG00000078369	GNB1	hsa_circ_0006869	1	1804419	1825499	-
1:1804419|1839238	2.89947	0	2.36742	0	0	1.95955	1.75563	0.653185	-1.10245	0.366734	0.921644	exon	ENST00000434686,ENST00000378609,ENST00000439272,ENST00000615252	ENSG00000078369	GNB1	hsa_circ_0005907	1	1804419	1839238	-
1:1806475|1825499	0	0	0	1.09988	0	0	0	0.366626	0.366626	0.661625	0.921644	exon	ENST00000434686,ENST00000610897,ENST00000378609,ENST00000439272,ENST00000437146,ENST00000615252	ENSG00000078369	GNB1	hsa_circ_0004406	1	1806475	1825499	-
1:180787753|180811488	1.38702	0	0	1.09988	0	0	0.46234	0.366626	-0.0957141	0.951077	0.983054	exon	ENST00000367590,ENST00000367589	ENSG00000143324	XPR1	hsa_circ_0015512	1	180787753	180811488	+
1:180803388|180811488	0	3.1275	0	1.94801	0	0	1.0425	0.649335	-0.393166	0.730289	0.921644	exon	ENST00000367590,ENST00000367589	ENSG00000143324	XPR1	hsa_circ_0015513	1	180803388	180811488	+
1:180803388|180825344	0	0	0	0	0	2.41525	0	0.805084	0.805084	0.395572	0.921644	exon	ENST00000367590,ENST00000367589	ENSG00000143324	XPR1	---	---	---	---	---
5:168488602|168494650	7.4146	7.56469	6.55747	7.16913	7.09995	7.03368	7.17892	7.10092	-0.0779981	0.578108	0.921644	exon	ENST00000231572,ENST00000520013,ENST00000522834,ENST00000521939	ENSG00000113643	RARS	hsa_circ_0001550	5	168488602	168494650	+
1:180824753|180863874	0	0	1.80575	0	0	0	0.601917	0	-0.601917	0.475406	0.921644	exon	ENST00000367590,ENST00000367589	ENSG00000143324	XPR1	hsa_circ_0015517	1	180824753	180863874	+
1:180824753|180880297	0	0	0	1.94801	0	0	0	0.649335	0.649335	0.47295	0.921644	exon	ENST00000367590,ENST00000367589	ENSG00000143324	XPR1	---	---	---	---	---
1:180834874|180863874	1.38702	2.62281	0	2.74778	0	0	1.33661	0.915926	-0.420683	0.965552	0.986722	exon	ENST00000367590,ENST00000367589	ENSG00000143324	XPR1	hsa_circ_0015519	1	180834874	180863874	+
1:180834874|180873942	1.38702	0	0	1.09988	0	2.41525	0.46234	1.17171	0.70937	0.552791	0.921644	exon	ENST00000367590,ENST00000367589	ENSG00000143324	XPR1	hsa_circ_0015520	1	180834874	180873942	+
1:180834874|180880297	0	0	0	1.94801	0	0	0	0.649335	0.649335	0.47295	0.921644	exon	ENST00000367590,ENST00000367589	ENSG00000143324	XPR1	---	---	---	---	---
1:180836522|180873942	2.08091	0	0	0	0	0	0.693638	0	-0.693638	0.429293	0.921644	exon	ENST00000367590	ENSG00000143324	XPR1	---	---	---	---	---
1:180836522|180880297	0	0	0	0.652309	0	0	0	0.217436	0.217436	0.781429	0.921644	exon	ENST00000367590	ENSG00000143324	XPR1	---	---	---	---	---
1:180863708|180880297	0	0	0	1.09988	0	0	0	0.366626	0.366626	0.661625	0.921644	exon	ENST00000367590,ENST00000367589	ENSG00000143324	XPR1	hsa_circ_0015521	1	180863708	180880297	+
15:80120328|80122800	7.16142	7.25932	7.10281	6.91267	7.41978	6.95187	7.17451	7.09477	-0.0797408	0.613998	0.921644	exon	ENST00000558087,ENST00000558494,ENST00000558997,ENST00000558390,ENST00000560976,ENST00000564367,ENST00000558688,ENST00000559775,ENST00000559157,ENST00000558724,ENST00000261749,ENST00000561060,ENST00000559835,ENST00000618205,ENST00000613266,ENST00000616533	ENSG00000086666	ZFAND6	hsa_circ_0000643	15	80120328	80122800	+
7:43639449|43640649	7.19361	6.47104	7.85471	7.47753	7.13214	7.67739	7.17312	7.42902	0.2559	0.782216	0.922235	exon	ENST00000415076,ENST00000310564,ENST00000446564,ENST00000490251,ENST00000223336,ENST00000488813,ENST00000446330,ENST00000438444,ENST00000395879	ENSG00000106603	COA1	hsa_circ_0001700	7	43639449	43640649	-
1:180989984|181005463	0	0	0	1.09988	0	0	0	0.366626	0.366626	0.661625	0.921644	exon	ENST00000258301	ENSG00000135823	STX6	---	---	---	---	---
1:181002606|181005463	2.54748	0	2.11375	2.14734	0	1.95955	1.55374	1.36896	-0.184781	0.850225	0.946937	exon	ENST00000258301	ENSG00000135823	STX6	hsa_circ_0015529	1	181002606	181005463	-
9:111527268|111534353	7.0427	7.33041	7.09405	7.43049	7.86499	8.05976	7.15572	7.78508	0.629357	0.013032	0.921644	exon	ENST00000309235,ENST00000358151,ENST00000355824	ENSG00000173258	ZNF483	---	---	---	---	---
1:1815756|1839238	2.54748	0	3.34375	3.87974	3.3625	4.19665	1.96374	3.81296	1.84922	0.11128	0.921644	exon	ENST00000434686,ENST00000378609,ENST00000439272	ENSG00000078369	GNB1	hsa_circ_0008702	1	1815756	1839238	-
1:1815756|1853297	1.38702	0	0	1.71665	0	0	0.46234	0.572217	0.109878	0.884168	0.960332	exon_intron	ENST00000471354,ENST00000434686,ENST00000610897,ENST00000378609,ENST00000607589,ENST00000439272,ENST00000437146,ENST00000472614,ENST00000615252	ENSG00000078369	GNB1	---	---	---	---	---
1:181577766|181580776	0	1.83985	0	0	0	0	0.613285	0	-0.613285	0.494453	0.921644	exon	ENST00000621791,ENST00000524607,ENST00000367570,ENST00000358338,ENST00000367573,ENST00000357570,ENST00000621551,ENST00000360108,ENST00000533229,ENST00000367567	ENSG00000198216	CACNA1E	hsa_circ_0015537	1	181577766	181580776	+
1:182313490|182313785	0	1.83985	0	0	0	0	0.613285	0	-0.613285	0.494453	0.921644	exon	ENST00000449842	ENSG00000228918	LINC01344	---	---	---	---	---
1:182385760|182388750	0	0	0	1.71665	0	0	0	0.572217	0.572217	0.523576	0.921644	exon	ENST00000463851,ENST00000339526,ENST00000484996,ENST00000491322,ENST00000331872,ENST00000311223,ENST00000489818,ENST00000417584	ENSG00000135821	GLUL	---	---	---	---	---
1:182386426|182387130	0	0	0	1.09988	0	0	0	0.366626	0.366626	0.661625	0.921644	exon	ENST00000491322	ENSG00000135821	GLUL	hsa_circ_0006949	1	182386426	182387130	-
1:182386428|182387130	0	1.83985	0	0	0	0	0.613285	0	-0.613285	0.494453	0.921644	exon	ENST00000491322	ENSG00000135821	GLUL	---	---	---	---	---
1:182665969|182672932	0	0	1.80575	0	0	0	0.601917	0	-0.601917	0.475406	0.921644	exon	ENST00000491420	ENSG00000135824	RGS8	---	---	---	---	---
1:182803698|182814858	0	0	0	1.09988	0	0	0	0.366626	0.366626	0.661625	0.921644	exon	ENST00000367554,ENST00000488424,ENST00000367553,ENST00000258317,ENST00000367555,ENST00000463899,ENST00000614468,ENST00000479721,ENST00000367552	ENSG00000135838	NPL	---	---	---	---	---
1:182803698|182825820	0	0	0	1.94801	0	0	0	0.649335	0.649335	0.47295	0.921644	exon	ENST00000367554,ENST00000488424,ENST00000367553,ENST00000258317,ENST00000367555,ENST00000463899,ENST00000614468,ENST00000367552	ENSG00000135838	NPL	---	---	---	---	---
1:182842545|182843434	0	0	0.873449	0	0	0	0.29115	0	-0.29115	0.69286	0.921644	exon	ENST00000483416,ENST00000367549	ENSG00000135829	DHX9	hsa_circ_0015548	1	182842545	182843434	+
1:182842545|182852344	1.38702	0	0	0	0	0	0.46234	0	-0.46234	0.58606	0.921644	exon	ENST00000483416,ENST00000367549	ENSG00000135829	DHX9	---	---	---	---	---
1:182842678|182843271	0	1.83985	0	0	0	0	0.613285	0	-0.613285	0.494453	0.921644	intron	ENST00000483416,ENST00000367549	ENSG00000135829	DHX9	---	---	---	---	---
1:182852233|182856578	0	0	0.873449	0	0	0	0.29115	0	-0.29115	0.69286	0.921644	exon	ENST00000367549	ENSG00000135829	DHX9	---	---	---	---	---
1:182852233|182860184	0	0	0	0	0	2.41525	0	0.805084	0.805084	0.395572	0.921644	exon	ENST00000367549	ENSG00000135829	DHX9	---	---	---	---	---
1:182872337|182880608	1.38702	0	2.36742	0	2.03388	3.03976	1.25148	1.69121	0.439734	0.717214	0.921644	exon	ENST00000367549	ENSG00000135829	DHX9	hsa_circ_0015569	1	182872337	182880608	+
1:182872337|182881647	0	0	0	0	2.03388	0	0	0.677962	0.677962	0.50093	0.921644	exon	ENST00000367549	ENSG00000135829	DHX9	---	---	---	---	---
1:182872337|182883635	2.08091	0	0	0	0	0	0.693638	0	-0.693638	0.429293	0.921644	exon	ENST00000367549	ENSG00000135829	DHX9	---	---	---	---	---
1:182874854|182880608	2.54748	1.83985	2.58309	0	0	0	2.32348	0	-2.32348	0.0193318	0.921644	exon	ENST00000367549	ENSG00000135829	DHX9	hsa_circ_0015571	1	182874854	182880608	+
1:182874854|182883368	0	0	1.80575	0	0	0	0.601917	0	-0.601917	0.475406	0.921644	exon	ENST00000367549	ENSG00000135829	DHX9	---	---	---	---	---
1:182881264|182884813	0	0	0	0	0	1.28966	0	0.429887	0.429887	0.635324	0.921644	exon	ENST00000485081,ENST00000367549	ENSG00000135829	DHX9	---	---	---	---	---
1:183108276|183110654	0	0	0	1.09988	0	0	0	0.366626	0.366626	0.661625	0.921644	exon	ENST00000258341	ENSG00000135862	LAMC1	hsa_circ_0005248	1	183108276	183110654	+
1:183114531|183115637	0	0	2.58309	2.61944	0	0	0.861031	0.873148	0.0121178	0.990691	0.996469	exon	ENST00000479499,ENST00000258341	ENSG00000135862	LAMC1	hsa_circ_0004573	1	183114531	183115637	+
1:183114531|183118146	0	2.62281	0	0.652309	2.84602	2.41525	0.874269	1.97119	1.09692	0.541729	0.921644	exon	ENST00000258341	ENSG00000135862	LAMC1	---	---	---	---	---
1:183116577|183118146	2.08091	0	1.41363	0.652309	2.03388	0	1.16485	0.895398	-0.269452	0.785784	0.924928	exon	ENST00000258341	ENSG00000135862	LAMC1	---	---	---	---	---
1:183117320|183121944	0	0	0.873449	0	0	0	0.29115	0	-0.29115	0.69286	0.921644	exon	ENST00000258341	ENSG00000135862	LAMC1	---	---	---	---	---
1:183124631|183132537	0	0	0.873449	0	0	0	0.29115	0	-0.29115	0.69286	0.921644	exon	ENST00000258341	ENSG00000135862	LAMC1	---	---	---	---	---
1:183130344|183135156	0	0	0	0.652309	0	0	0	0.217436	0.217436	0.781429	0.921644	exon	ENST00000258341	ENSG00000135862	LAMC1	---	---	---	---	---
1:183517688|183529533	1.38702	0	0	0	0	0	0.46234	0	-0.46234	0.58606	0.921644	exon	ENST00000508461,ENST00000367537,ENST00000515829,ENST00000347615,ENST00000507469,ENST00000419169	ENSG00000116698	SMG7	---	---	---	---	---
1:183526596|183533832	0	0	0.873449	0.652309	0	0	0.29115	0.217436	-0.0737133	0.941112	0.98174	exon	ENST00000508461,ENST00000367537,ENST00000515829,ENST00000347615,ENST00000507469,ENST00000419169	ENSG00000116698	SMG7	---	---	---	---	---
1:183545966|183549288	0	1.83985	0	0	0	0	0.613285	0	-0.613285	0.494453	0.921644	exon	ENST00000508461,ENST00000367537,ENST00000515829,ENST00000347615,ENST00000507469	ENSG00000116698	SMG7	hsa_circ_0015628	1	183545966	183549288	+
1:183573185|183574621	0	1.83985	0	1.09988	0	0	0.613285	0.366626	-0.246659	0.840168	0.941209	exon	ENST00000367535,ENST00000367536	ENSG00000116701	NCF2	---	---	---	---	---
1:183742126|183866073	0	0	1.41363	0	0	0	0.471212	0	-0.471212	0.566201	0.921644	exon	ENST00000304685	ENSG00000143344	RGL1	hsa_circ_0015638	1	183742126	183866073	+
1:183880616|183892161	0	0	0	0.652309	0	0	0	0.217436	0.217436	0.781429	0.921644	exon	ENST00000304685,ENST00000360851	ENSG00000143344	RGL1	---	---	---	---	---
1:183880616|183897897	2.54748	1.83985	1.80575	1.44098	0	1.28966	2.06436	0.910213	-1.15415	0.38632	0.921644	exon	ENST00000304685,ENST00000360851	ENSG00000143344	RGL1	---	---	---	---	---
1:183880616|183900236	0	0	1.80575	0	0	1.28966	0.601917	0.429887	-0.17203	0.840783	0.941209	exon	ENST00000304685,ENST00000360851	ENSG00000143344	RGL1	---	---	---	---	---
1:183880616|183912268	0	0	2.77067	0	0	0	0.923558	0	-0.923558	0.278376	0.921644	exon	ENST00000304685,ENST00000360851	ENSG00000143344	RGL1	---	---	---	---	---
1:183883786|183892161	0	0	0	0.652309	0	0	0	0.217436	0.217436	0.781429	0.921644	exon	ENST00000304685,ENST00000360851	ENSG00000143344	RGL1	---	---	---	---	---
1:183897808|183907101	0	0	0	0.652309	0	1.95955	0	0.870621	0.870621	0.421048	0.921644	exon	ENST00000304685,ENST00000360851	ENSG00000143344	RGL1	---	---	---	---	---
1:183900150|183912268	0	0	0.873449	0	0	0	0.29115	0	-0.29115	0.69286	0.921644	exon	ENST00000304685,ENST00000360851	ENSG00000143344	RGL1	---	---	---	---	---
1:1839190|1839682	0	0	1.41363	0	0	0	0.471212	0	-0.471212	0.566201	0.921644	exon	ENST00000434686	ENSG00000078369	GNB1	---	---	---	---	---
1:1839190|1853297	0	0	0	0.652309	0	0	0	0.217436	0.217436	0.781429	0.921644	exon_intron	ENST00000434686,ENST00000378609,ENST00000439272,ENST00000472614,ENST00000615252	ENSG00000078369	GNB1	---	---	---	---	---
1:183951007|183978520	0	0	0	0	0	1.28966	0	0.429887	0.429887	0.635324	0.921644	exon	ENST00000361927	ENSG00000198756	COLGALT2	hsa_circ_0015643	1	183951007	183978520	-
1:184706643|184711877	0	0	2.58309	2.74778	2.03388	3.27325	0.861031	2.68497	1.82394	0.277933	0.921644	exon	ENST00000367512,ENST00000318130	ENSG00000116406	EDEM3	hsa_circ_0006507	1	184706643	184711877	-
1:184712433|184726389	0	0	0	0	0	1.28966	0	0.429887	0.429887	0.635324	0.921644	exon	ENST00000367512,ENST00000318130	ENSG00000116406	EDEM3	---	---	---	---	---
1:184712433|184732990	0	0	0	1.09988	0	0	0	0.366626	0.366626	0.661625	0.921644	exon	ENST00000367512,ENST00000318130	ENSG00000116406	EDEM3	---	---	---	---	---
1:184732837|184737711	0	0	0	1.71665	0	0	0	0.572217	0.572217	0.523576	0.921644	exon	ENST00000367512,ENST00000318130,ENST00000474725,ENST00000466606	ENSG00000116406	EDEM3	hsa_circ_0003442	1	184732837	184737711	-
1:184732837|184749592	2.08091	3.79688	2.11375	0	0	2.41525	2.66385	0.805084	-1.85876	0.240687	0.921644	exon	ENST00000367512,ENST00000318130	ENSG00000116406	EDEM3	---	---	---	---	---
1:184884633|184899309	0	0	0	0	2.84602	0	0	0.948672	0.948672	0.330659	0.921644	exon	ENST00000367511	ENSG00000135842	FAM129A	hsa_circ_0008703	1	184884633	184899309	-
18:9583117|9595153	7.2711	7.3071	6.88652	7.11065	6.99884	6.19447	7.15491	6.76799	-0.386916	0.199915	0.921644	exon	ENST00000400556	ENSG00000154845	PPP4R1	hsa_circ_0007509	18	9583117	9595153	-
1:185123857|185137796	0	0	0.873449	0	0	0	0.29115	0	-0.29115	0.69286	0.921644	exon	ENST00000367506	ENSG00000121486	TRMT1L	---	---	---	---	---
1:185124944|185137796	0	0	0	1.71665	0	0	0	0.572217	0.572217	0.523576	0.921644	exon	ENST00000367506,ENST00000458395	ENSG00000121486	TRMT1L	hsa_circ_0015663	1	185124944	185137796	-
1:185143906|185151935	0	1.83985	0	0	0	0	0.613285	0	-0.613285	0.494453	0.921644	exon	ENST00000367506	ENSG00000121486	TRMT1L	---	---	---	---	---
1:185160833|185166652	0	1.83985	0	1.44098	0	0	0.613285	0.480325	-0.132959	0.929157	0.977053	exon	ENST00000367501,ENST00000367500,ENST00000450350	ENSG00000116668	SWT1	---	---	---	---	---
1:185160833|185175113	2.08091	0	0	0	0	1.95955	0.693638	0.653185	-0.0404536	0.959894	0.983054	exon	ENST00000367501,ENST00000367500	ENSG00000116668	SWT1	---	---	---	---	---
1:185180391|185184931	0	0	2.36742	0	0	1.28966	0.789141	0.429887	-0.359254	0.66985	0.921644	exon	ENST00000367501,ENST00000367500	ENSG00000116668	SWT1	---	---	---	---	---
1:185180391|185190642	0	0	0.873449	1.09988	0	0	0.29115	0.366626	0.0754759	0.929396	0.977053	exon	ENST00000367501,ENST00000367500	ENSG00000116668	SWT1	---	---	---	---	---
1:185180391|185231708	0	0	0	0	0	1.95955	0	0.653185	0.653185	0.485036	0.921644	exon	ENST00000367501,ENST00000367500	ENSG00000116668	SWT1	---	---	---	---	---
1:185180391|185271389	1.38702	0	0	0	0	0	0.46234	0	-0.46234	0.58606	0.921644	exon	ENST00000367501,ENST00000367500	ENSG00000116668	SWT1	---	---	---	---	---
1:185181946|185184931	0	0	0.873449	0	0	0	0.29115	0	-0.29115	0.69286	0.921644	exon	ENST00000367501,ENST00000367500	ENSG00000116668	SWT1	---	---	---	---	---
1:185181946|185190642	0	0	0	0	2.03388	0	0	0.677962	0.677962	0.50093	0.921644	exon	ENST00000367501,ENST00000367500	ENSG00000116668	SWT1	---	---	---	---	---
1:185181946|185214655	0	0	0	0	0	1.28966	0	0.429887	0.429887	0.635324	0.921644	exon	ENST00000367501,ENST00000367500	ENSG00000116668	SWT1	---	---	---	---	---
1:185181946|185231708	0	0	0	1.44098	0	0	0	0.480325	0.480325	0.5841	0.921644	exon	ENST00000367501,ENST00000367500	ENSG00000116668	SWT1	---	---	---	---	---
1:185184243|185214655	1.38702	0	0.873449	1.44098	0	0	0.753489	0.480325	-0.273164	0.912521	0.973272	exon	ENST00000367501,ENST00000367500	ENSG00000116668	SWT1	---	---	---	---	---
1:185184243|185222036	0	0	1.41363	2.14734	0	1.95955	0.471212	1.36896	0.897752	0.511745	0.921644	exon	ENST00000367501,ENST00000367500	ENSG00000116668	SWT1	---	---	---	---	---
1:185184243|185231708	0	3.79688	0.873449	1.94801	0	0	1.55678	0.649335	-0.90744	0.463318	0.921644	exon	ENST00000367501,ENST00000367500	ENSG00000116668	SWT1	hsa_circ_0015677	1	185184243	185231708	+
7:80789306|80810701	6.83386	7.13243	7.49761	7.74691	7.03334	7.43396	7.15463	7.40474	0.250105	0.41768	0.921644	exon	ENST00000419255,ENST00000265361	ENSG00000075223	SEMA3C	hsa_circ_0004365	7	80789306	80810701	-
1:185202654|185231708	2.54748	2.62281	2.58309	2.74778	0	3.03976	2.58446	1.92918	-0.655281	0.906418	0.970932	exon	ENST00000367501,ENST00000367500	ENSG00000116668	SWT1	---	---	---	---	---
1:185204700|185214655	1.38702	0	0	0	0	0	0.46234	0	-0.46234	0.58606	0.921644	exon	ENST00000367501,ENST00000367500	ENSG00000116668	SWT1	---	---	---	---	---
1:185204700|185231708	1.38702	0	0	0	0	0	0.46234	0	-0.46234	0.58606	0.921644	exon	ENST00000367501,ENST00000367500	ENSG00000116668	SWT1	---	---	---	---	---
2:202464809|202467689	7.20945	6.90289	7.33613	7.30572	7.49596	7.04951	7.14949	7.28373	0.134238	0.765109	0.921644	exon	ENST00000374580,ENST00000374574	ENSG00000204217	BMPR2	hsa_circ_0003218	2	202464809	202467689	+
1:185214507|185276668	0	1.83985	0	1.71665	0	0	0.613285	0.572217	-0.0410675	0.993518	0.996909	exon	ENST00000367501,ENST00000367500	ENSG00000116668	SWT1	---	---	---	---	---
1:185300437|185305643	0	0	2.36742	0	0	1.95955	0.789141	0.653185	-0.135956	0.877605	0.958747	exon	ENST00000367498,ENST00000459929,ENST00000480769	ENSG00000116679	IVNS1ABP	---	---	---	---	---
1:185846026|185865863	1.38702	1.83985	0	0	0	1.28966	1.07562	0.429887	-0.645737	0.665735	0.921644	exon	ENST00000271588	ENSG00000143341	HMCN1	---	---	---	---	---
1:185909337|185933824	2.54748	0	0	0	0	0	0.849161	0	-0.849161	0.345815	0.921644	exon	ENST00000271588	ENSG00000143341	HMCN1	---	---	---	---	---
1:185962518|185970493	1.38702	0	0	0	0	0	0.46234	0	-0.46234	0.58606	0.921644	exon	ENST00000485744,ENST00000271588	ENSG00000143341	HMCN1	---	---	---	---	---
1:185977787|185997524	0	0	0	1.09988	0	0	0	0.366626	0.366626	0.661625	0.921644	exon	ENST00000271588	ENSG00000143341	HMCN1	---	---	---	---	---
1:186055393|186061964	0	0	0.873449	0	0	0	0.29115	0	-0.29115	0.69286	0.921644	exon	ENST00000271588	ENSG00000143341	HMCN1	---	---	---	---	---
1:186057234|186062600	0	1.83985	4.14084	2.86562	2.03388	3.27325	1.99356	2.72425	0.730689	0.919585	0.977053	exon	ENST00000271588	ENSG00000143341	HMCN1	---	---	---	---	---
1:186076428|186117115	0	1.83985	0	0	0	0	0.613285	0	-0.613285	0.494453	0.921644	exon	ENST00000271588	ENSG00000143341	HMCN1	---	---	---	---	---
1:186108461|186115414	0	0	0	0	0	1.28966	0	0.429887	0.429887	0.635324	0.921644	exon	ENST00000271588	ENSG00000143341	HMCN1	---	---	---	---	---
1:186144173|186153987	2.08091	0	0	0	0	0	0.693638	0	-0.693638	0.429293	0.921644	exon	ENST00000271588	ENSG00000143341	HMCN1	---	---	---	---	---
1:186317482|186318828	0	0	0.873449	0	0	1.95955	0.29115	0.653185	0.362035	0.722168	0.921644	exon	ENST00000367478	ENSG00000047410	TPR	---	---	---	---	---
1:186318447|186318828	0	1.83985	0	1.44098	0	0	0.613285	0.480325	-0.132959	0.929157	0.977053	exon	ENST00000367478	ENSG00000047410	TPR	---	---	---	---	---
1:186322318|186325854	0	1.83985	0	0	0	0	0.613285	0	-0.613285	0.494453	0.921644	exon	ENST00000367478	ENSG00000047410	TPR	---	---	---	---	---
1:186335338|186337156	0	0	1.80575	0	0	0	0.601917	0	-0.601917	0.475406	0.921644	exon	ENST00000367478	ENSG00000047410	TPR	---	---	---	---	---
1:186379767|186389624	0	0	0	0	2.03388	0	0	0.677962	0.677962	0.50093	0.921644	exon	ENST00000287859,ENST00000367470,ENST00000419367	ENSG00000157181	C1orf27	---	---	---	---	---
1:186379767|186406268	0	0	0	1.44098	0	0	0	0.480325	0.480325	0.5841	0.921644	exon	ENST00000287859,ENST00000367470,ENST00000419367	ENSG00000157181	C1orf27	---	---	---	---	---
1:186383022|186394015	0	0	0	0	2.03388	0	0	0.677962	0.677962	0.50093	0.921644	exon	ENST00000287859,ENST00000419367	ENSG00000157181	C1orf27	---	---	---	---	---
1:186388442|186394015	0	0	0	0	2.84602	0	0	0.948672	0.948672	0.330659	0.921644	exon	ENST00000287859,ENST00000419367	ENSG00000157181	C1orf27	---	---	---	---	---
1:186390711|186394015	0	0	1.41363	0	2.84602	0	0.471212	0.948672	0.477461	0.678676	0.921644	exon	ENST00000287859,ENST00000419367	ENSG00000157181	C1orf27	---	---	---	---	---
1:186390711|186406268	0	0	0	0.652309	0	0	0	0.217436	0.217436	0.781429	0.921644	exon	ENST00000287859,ENST00000367470,ENST00000419367	ENSG00000157181	C1orf27	---	---	---	---	---
1:186398313|186406268	0	0	1.41363	2.32244	0	0	0.471212	0.774146	0.302935	0.725991	0.921644	exon	ENST00000287859,ENST00000367470,ENST00000419367	ENSG00000157181	C1orf27	---	---	---	---	---
1:186406083|186411893	0	0	2.11375	0.652309	0	0	0.704583	0.217436	-0.487147	0.606858	0.921644	exon	ENST00000478571	ENSG00000157181	C1orf27	---	---	---	---	---
1:186406083|186419077	2.54748	0	0	1.44098	2.84602	2.41525	0.849161	2.23408	1.38492	0.480548	0.921644	exon	ENST00000287859,ENST00000367470,ENST00000419367	ENSG00000157181	C1orf27	hsa_circ_0000166	1	186406083	186419077	+
1:186854286|186911389	0	1.83985	0	0	0	0	0.613285	0	-0.613285	0.494453	0.921644	exon	ENST00000367466,ENST00000466600	ENSG00000116711	PLA2G4A	---	---	---	---	---
1:186893011|186894211	0	0	0	0.652309	0	0	0	0.217436	0.217436	0.781429	0.921644	exon	ENST00000367466,ENST00000466600	ENSG00000116711	PLA2G4A	---	---	---	---	---
1:186893011|186911389	2.89947	0	2.11375	1.44098	3.74203	2.41525	1.67107	2.53275	0.861681	0.576401	0.921644	exon	ENST00000367466,ENST00000466600	ENSG00000116711	PLA2G4A	---	---	---	---	---
1:186911248|186956344	0	1.83985	0	0	0	0	0.613285	0	-0.613285	0.494453	0.921644	exon	ENST00000367466	ENSG00000116711	PLA2G4A	---	---	---	---	---
1:187303466|187329060	0	0	1.80575	2.14734	0	2.41525	0.601917	1.52086	0.918946	0.525709	0.921644	exon	ENST00000458683	ENSG00000236030	LINC01036	---	---	---	---	---
1:19081349|19084698	0	0	0	0.652309	0	2.76104	0	1.13778	1.13778	0.237178	0.921644	exon	ENST00000375224,ENST00000375254	ENSG00000127481	UBR4	---	---	---	---	---
1:19092930|19093312	0	0	0	0	0	1.28966	0	0.429887	0.429887	0.635324	0.921644	intron	ENST00000375224,ENST00000492606,ENST00000375254	ENSG00000127481	UBR4	---	---	---	---	---
1:19100376|19106726	0	0	1.41363	0	0	0	0.471212	0	-0.471212	0.566201	0.921644	exon	ENST00000375254	ENSG00000127481	UBR4	---	---	---	---	---
1:19128978|19140892	0	0	0	1.09988	0	0	0	0.366626	0.366626	0.661625	0.921644	exon	ENST00000375254	ENSG00000127481	UBR4	---	---	---	---	---
1:19138007|19139220	0	0	0	1.09988	0	0	0	0.366626	0.366626	0.661625	0.921644	exon	ENST00000425413,ENST00000417040,ENST00000375254	ENSG00000127481	UBR4	---	---	---	---	---
1:19154918|19161736	0	1.83985	0	0	0	0	0.613285	0	-0.613285	0.494453	0.921644	exon	ENST00000417040,ENST00000375254,ENST00000419533	ENSG00000127481	UBR4	---	---	---	---	---
1:19154918|19164997	0	0	0	1.71665	0	0	0	0.572217	0.572217	0.523576	0.921644	exon	ENST00000417040,ENST00000375254,ENST00000419533	ENSG00000127481	UBR4	---	---	---	---	---
1:19156767|19160281	2.08091	0	1.41363	3.70103	0	0	1.16485	1.23368	0.0688268	0.641002	0.921644	exon	ENST00000417040,ENST00000375254,ENST00000419533	ENSG00000127481	UBR4	hsa_circ_0010330	1	19156767	19160281	-
1:19164253|19165349	0	0	0	1.09988	0	0	0	0.366626	0.366626	0.661625	0.921644	exon	ENST00000417040,ENST00000375254,ENST00000419533	ENSG00000127481	UBR4	---	---	---	---	---
1:19165656|19173621	0	0	0	0	0	2.41525	0	0.805084	0.805084	0.395572	0.921644	exon	ENST00000375254,ENST00000419533	ENSG00000127481	UBR4	---	---	---	---	---
1:19170762|19175033	0	0	0	0	2.03388	0	0	0.677962	0.677962	0.50093	0.921644	exon	ENST00000375254,ENST00000419533	ENSG00000127481	UBR4	hsa_circ_0010355	1	19170762	19175033	-
1:19176592|19187540	1.38702	1.83985	0	0	0	1.28966	1.07562	0.429887	-0.645737	0.665735	0.921644	exon	ENST00000375254	ENSG00000127481	UBR4	---	---	---	---	---
1:19183811|19185286	2.08091	0	3.22039	1.94801	0	2.76104	1.7671	1.56968	-0.19742	0.770411	0.921644	exon	ENST00000375254	ENSG00000127481	UBR4	hsa_circ_0003777	1	19183811	19185286	-
1:19183811|19186657	1.38702	0	0	0	0	0	0.46234	0	-0.46234	0.58606	0.921644	exon	ENST00000375254	ENSG00000127481	UBR4	hsa_circ_0010372	1	19183811	19186657	-
1:19183811|19187540	0	1.83985	0	2.14734	2.84602	0	0.613285	1.66445	1.05117	0.385375	0.921644	exon	ENST00000375254	ENSG00000127481	UBR4	---	---	---	---	---
1:19183811|19201815	0	0	1.41363	1.09988	0	0	0.471212	0.366626	-0.104586	0.926801	0.977053	exon	ENST00000375254	ENSG00000127481	UBR4	---	---	---	---	---
1:19193433|19197265	0	1.83985	2.11375	1.09988	0	1.95955	1.31787	1.01981	-0.298058	0.813573	0.9362	exon	ENST00000375254	ENSG00000127481	UBR4	---	---	---	---	---
1:19193433|19199754	0	0	1.80575	0	0	0	0.601917	0	-0.601917	0.475406	0.921644	exon	ENST00000375254	ENSG00000127481	UBR4	---	---	---	---	---
1:19193433|19201815	0	0	1.41363	0	0	0	0.471212	0	-0.471212	0.566201	0.921644	exon	ENST00000375254	ENSG00000127481	UBR4	---	---	---	---	---
1:19197141|19201815	1.38702	0	0	0	0	0	0.46234	0	-0.46234	0.58606	0.921644	exon	ENST00000375254	ENSG00000127481	UBR4	---	---	---	---	---
1:19197670|19201815	1.38702	1.83985	0.873449	0	0	2.41525	1.36677	0.805084	-0.56169	0.938436	0.98174	exon	ENST00000375254	ENSG00000127481	UBR4	---	---	---	---	---
1:19222624|19231422	0	0	0	0.652309	0	0	0	0.217436	0.217436	0.781429	0.921644	exon	ENST00000375208,ENST00000375199,ENST00000477853	ENSG00000127463	EMC1	---	---	---	---	---
1:19232624|19235252	0	2.62281	0	1.71665	0	0	0.874269	0.572217	-0.302052	0.789568	0.927343	exon	ENST00000375208,ENST00000375199,ENST00000477853	ENSG00000127463	EMC1	---	---	---	---	---
1:19235130|19244015	0	0	0	1.71665	0	0	0	0.572217	0.572217	0.523576	0.921644	exon	ENST00000375199,ENST00000477853	ENSG00000127463	EMC1	---	---	---	---	---
1:19243614|19244015	0	0	0	1.44098	0	3.6505	0	1.69716	1.69716	0.173076	0.921644	exon	ENST00000375199,ENST00000477853	ENSG00000127463	EMC1	hsa_circ_0010389	1	19243614	19244015	-
1:19254782|19256051	0	0	0	1.09988	0	0	0	0.366626	0.366626	0.661625	0.921644	exon	ENST00000493700,ENST00000330263	ENSG00000053372	MRTO4	---	---	---	---	---
1:19255948|19257984	0	0	2.11375	0	0	0	0.704583	0	-0.704583	0.413185	0.921644	exon	ENST00000330263	ENSG00000053372	MRTO4	---	---	---	---	---
1:193020307|193029657	0	0	1.41363	0	0	0	0.471212	0	-0.471212	0.566201	0.921644	exon	ENST00000367448	ENSG00000116750	UCHL5	---	---	---	---	---
1:193022926|193029657	0	0	0	0	2.03388	0	0	0.677962	0.677962	0.50093	0.921644	exon	ENST00000367448,ENST00000367449,ENST00000367454,ENST00000367451,ENST00000367450,ENST00000367455	ENSG00000116750	UCHL5	---	---	---	---	---
1:193027875|193029657	2.89947	0	0	0	0	0	0.966489	0	-0.966489	0.255082	0.921644	exon	ENST00000367451,ENST00000367450	ENSG00000116750	UCHL5	---	---	---	---	---
1:193028085|193029657	4.10045	1.83985	0	2.14734	4.2906	1.95955	1.9801	2.79916	0.81906	0.863588	0.952345	exon	ENST00000367448,ENST00000367449,ENST00000367454,ENST00000421683,ENST00000367451,ENST00000367450,ENST00000367455	ENSG00000116750	UCHL5	hsa_circ_0015733	1	193028085	193029657	-
1:193069034|193069634	0	0	0	0	0	1.28966	0	0.429887	0.429887	0.635324	0.921644	exon	ENST00000367441,ENST00000367444,ENST00000367446,ENST00000367443,ENST00000400968,ENST00000367445	ENSG00000116747	TROVE2	hsa_circ_0015735	1	193069034	193069634	+
1:193069034|193077050	1.38702	0	0	1.09988	0	0	0.46234	0.366626	-0.0957141	0.951077	0.983054	exon	ENST00000367441,ENST00000367444,ENST00000367446,ENST00000367443,ENST00000400968,ENST00000367445	ENSG00000116747	TROVE2	---	---	---	---	---
1:193075820|193077050	2.54748	1.83985	0	2.74778	0	0	1.46245	0.915926	-0.546519	0.920491	0.977053	exon	ENST00000367441,ENST00000432079,ENST00000367444,ENST00000367446,ENST00000367443,ENST00000400968,ENST00000367445	ENSG00000116747	TROVE2	---	---	---	---	---
1:193125112|193138173	0	0	0	0	2.84602	0	0	0.948672	0.948672	0.330659	0.921644	exon	ENST00000635846,ENST00000482484,ENST00000367435	ENSG00000134371	CDC73	---	---	---	---	---
1:193130174|193147965	0	1.83985	1.80575	0	0	0	1.2152	0	-1.2152	0.281573	0.921644	exon	ENST00000367435	ENSG00000134371	CDC73	---	---	---	---	---
1:193130174|193152444	0	1.83985	1.80575	1.44098	0	0	1.2152	0.480325	-0.734876	0.640848	0.921644	exon	ENST00000367435	ENSG00000134371	CDC73	---	---	---	---	---
1:193135391|193138173	0	0	0	0	3.3625	0	0	1.12083	1.12083	0.271092	0.921644	exon	ENST00000635846,ENST00000482484,ENST00000367435	ENSG00000134371	CDC73	---	---	---	---	---
1:193135391|193142066	0	0	0	0.652309	0	0	0	0.217436	0.217436	0.781429	0.921644	exon	ENST00000635846,ENST00000367435	ENSG00000134371	CDC73	---	---	---	---	---
1:193135391|193152444	0	0	2.11375	0	0	0	0.704583	0	-0.704583	0.413185	0.921644	exon	ENST00000367435	ENSG00000134371	CDC73	---	---	---	---	---
1:193138085|193142066	1.38702	3.50067	2.77067	2.14734	0	3.47417	2.55279	1.87384	-0.678951	0.783517	0.923316	exon	ENST00000635846,ENST00000367435	ENSG00000134371	CDC73	---	---	---	---	---
1:193138085|193152444	0	0	0	0	2.03388	1.28966	0	1.10785	1.10785	0.373121	0.921644	exon	ENST00000367435	ENSG00000134371	CDC73	---	---	---	---	---
1:193141850|193152444	2.54748	3.50067	1.80575	2.97456	0	1.95955	2.61797	1.64471	-0.973262	0.582428	0.921644	exon	ENST00000367435	ENSG00000134371	CDC73	---	---	---	---	---
1:193203795|193236356	2.08091	1.83985	1.80575	0	0	0	1.90884	0	-1.90884	0.0903169	0.921644	exon	ENST00000635846,ENST00000367435	ENSG00000134371	CDC73	hsa_circ_0015749	1	193203795	193236356	+
1:193212065|193236356	0	0	0	0.652309	0	0	0	0.217436	0.217436	0.781429	0.921644	exon	ENST00000635846,ENST00000367435	ENSG00000134371	CDC73	hsa_circ_0000167	1	193212065	193236356	+
1:193232993|193236356	1.38702	1.83985	2.36742	0	2.03388	1.95955	1.86477	1.33115	-0.533619	0.706371	0.921644	exon	ENST00000635846,ENST00000367435	ENSG00000134371	CDC73	hsa_circ_0003820	1	193232993	193236356	+
1:193232993|193249871	0	0	0	1.71665	0	0	0	0.572217	0.572217	0.523576	0.921644	exon	ENST00000635846,ENST00000367435	ENSG00000134371	CDC73	---	---	---	---	---
1:19344358|19419750	0	0	0.873449	2.14734	2.84602	0	0.29115	1.66445	1.3733	0.236468	0.921644	exon	ENST00000433834,ENST00000264202,ENST00000375142,ENST00000375144	ENSG00000077549	CAPZB	---	---	---	---	---
1:19356635|19357563	0	0	0	1.09988	0	0	0	0.366626	0.366626	0.661625	0.921644	exon	ENST00000264203,ENST00000433834,ENST00000264202,ENST00000375142,ENST00000375144	ENSG00000077549	CAPZB	hsa_circ_0010402	1	19356635	19357563	-
1:19356635|19419750	0	0	0.873449	0.652309	0	1.28966	0.29115	0.647324	0.356174	0.801405	0.931732	exon	ENST00000264203,ENST00000433834,ENST00000264202,ENST00000375142,ENST00000375144	ENSG00000077549	CAPZB	---	---	---	---	---
1:19378540|19385626	0	0	1.80575	0	0	0	0.601917	0	-0.601917	0.475406	0.921644	exon	ENST00000264203,ENST00000433834,ENST00000264202,ENST00000375142,ENST00000457768,ENST00000482808,ENST00000459967,ENST00000375144,ENST00000489607	ENSG00000077549	CAPZB	---	---	---	---	---
1:19378540|19419750	2.08091	0	3.34375	0	0	1.28966	1.80822	0.429887	-1.37833	0.147864	0.921644	exon	ENST00000264203,ENST00000433834,ENST00000264202,ENST00000375142,ENST00000482808,ENST00000375144,ENST00000489607	ENSG00000077549	CAPZB	hsa_circ_0010404	1	19378540	19419750	-
1:196235986|196258494	2.08091	1.83985	0	0	2.84602	0	1.30692	0.948672	-0.358251	0.982029	0.992233	exon	ENST00000367433,ENST00000498426,ENST00000609185,ENST00000294725,ENST00000451324	ENSG00000162687	KCNT2	---	---	---	---	---
1:196280860|196305345	0	1.83985	0	0	0	0	0.613285	0	-0.613285	0.494453	0.921644	exon	ENST00000367433,ENST00000498426,ENST00000609185,ENST00000294725,ENST00000610076	ENSG00000162687	KCNT2	---	---	---	---	---
1:196280860|196316026	0	0	0.873449	0	0	0	0.29115	0	-0.29115	0.69286	0.921644	exon	ENST00000367433,ENST00000498426,ENST00000609185,ENST00000294725,ENST00000610076	ENSG00000162687	KCNT2	---	---	---	---	---
1:196280860|196317269	2.89947	0	0	0	0	0	0.966489	0	-0.966489	0.255082	0.921644	exon	ENST00000498426	ENSG00000162687	KCNT2	---	---	---	---	---
1:196305234|196342228	0	0	1.41363	0	0	0	0.471212	0	-0.471212	0.566201	0.921644	exon	ENST00000367433,ENST00000498426,ENST00000294725,ENST00000610076	ENSG00000162687	KCNT2	---	---	---	---	---
1:196326717|196342228	1.38702	0	0	0	0	0	0.46234	0	-0.46234	0.58606	0.921644	exon	ENST00000367433,ENST00000294725,ENST00000451324,ENST00000610076	ENSG00000162687	KCNT2	---	---	---	---	---
1:196331156|196342228	2.08091	1.83985	2.11375	1.09988	4.04223	0	2.01151	1.71404	-0.29747	0.657697	0.921644	exon	ENST00000367433,ENST00000498426,ENST00000294725,ENST00000451324,ENST00000610076	ENSG00000162687	KCNT2	---	---	---	---	---
1:196373140|196428269	0	1.83985	1.41363	2.47857	0	0	1.0845	0.826191	-0.258306	0.929486	0.977095	exon	ENST00000367433,ENST00000498426,ENST00000609185,ENST00000294725,ENST00000610076	ENSG00000162687	KCNT2	---	---	---	---	---
1:196373140|196429757	2.08091	0	1.41363	0	0	3.03976	1.16485	1.01325	-0.151596	0.852029	0.947434	exon	ENST00000367433,ENST00000498426,ENST00000609185,ENST00000294725,ENST00000610076	ENSG00000162687	KCNT2	---	---	---	---	---
1:196373140|196479238	2.54748	0	0	1.71665	0	0	0.849161	0.572217	-0.276943	0.797534	0.931732	exon	ENST00000367433,ENST00000609185,ENST00000294725,ENST00000451324,ENST00000610076	ENSG00000162687	KCNT2	---	---	---	---	---
1:196373140|196492341	0	0	0	0	2.84602	0	0	0.948672	0.948672	0.330659	0.921644	exon	ENST00000367433,ENST00000609185,ENST00000294725,ENST00000451324,ENST00000610076	ENSG00000162687	KCNT2	---	---	---	---	---
1:196398563|196428269	0	0	0	0.652309	0	0	0	0.217436	0.217436	0.781429	0.921644	exon	ENST00000367433,ENST00000498426,ENST00000609185,ENST00000294725,ENST00000610076	ENSG00000162687	KCNT2	---	---	---	---	---
1:196398563|196429757	2.89947	0	0	0	0	2.41525	0.966489	0.805084	-0.161405	0.876927	0.958418	exon	ENST00000367433,ENST00000498426,ENST00000609185,ENST00000294725,ENST00000610076	ENSG00000162687	KCNT2	---	---	---	---	---
1:196398563|196467786	0	0	2.11375	0	0	0	0.704583	0	-0.704583	0.413185	0.921644	exon	ENST00000367433,ENST00000609185,ENST00000294725,ENST00000451324,ENST00000610076	ENSG00000162687	KCNT2	---	---	---	---	---
1:196423050|196428269	0	0	0	0	0	1.28966	0	0.429887	0.429887	0.635324	0.921644	exon	ENST00000367433,ENST00000498426,ENST00000609185,ENST00000294725,ENST00000610076	ENSG00000162687	KCNT2	---	---	---	---	---
18:76849526|76851939	6.61357	7.37594	7.4572	7.31611	7.06703	6.93494	7.1489	7.10603	-0.0428767	0.688732	0.921644	exon	ENST00000543926,ENST00000320610,ENST00000579322,ENST00000253159	ENSG00000130856	ZNF236	hsa_circ_0004979	18	76849526	76851939	+
1:196429577|196479238	0	0	1.41363	2.61944	0	0	0.471212	0.873148	0.401937	0.630556	0.921644	exon	ENST00000367433,ENST00000609185,ENST00000294725,ENST00000610076	ENSG00000162687	KCNT2	---	---	---	---	---
1:196465293|196482379	1.38702	0	0	0	0	0	0.46234	0	-0.46234	0.58606	0.921644	exon	ENST00000367433,ENST00000609185,ENST00000294725,ENST00000451324,ENST00000610076	ENSG00000162687	KCNT2	---	---	---	---	---
1:196465293|196492341	3.4185	2.62281	2.11375	2.47857	0	1.28966	2.71835	1.25608	-1.46227	0.277681	0.921644	exon	ENST00000367433,ENST00000609185,ENST00000294725,ENST00000451324,ENST00000610076	ENSG00000162687	KCNT2	---	---	---	---	---
1:19655012|19655435	0	0	0.873449	0	0	0	0.29115	0	-0.29115	0.69286	0.921644	exon	ENST00000548815,ENST00000439664,ENST00000602384,ENST00000451758,ENST00000602293,ENST00000615215,ENST00000375136,ENST00000602450,ENST00000621723,ENST00000427894,ENST00000618761,ENST00000439278,ENST00000289749,ENST00000425400,ENST00000602662,ENST00000622566,ENST00000428975	ENSG00000158747,ENSG00000270136	NBL1,MINOS1-NBL1	---	---	---	---	---
1:196672978|196690239	0	0	2.11375	1.09988	0	0	0.704583	0.366626	-0.337958	0.722448	0.921644	exon	ENST00000359637,ENST00000630130,ENST00000367429	ENSG00000000971	CFH	---	---	---	---	---
1:196673857|196690239	0	0	0	0.652309	0	0	0	0.217436	0.217436	0.781429	0.921644	exon	ENST00000359637,ENST00000630130,ENST00000367429	ENSG00000000971	CFH	---	---	---	---	---
1:196675989|196685237	2.08091	0	0	2.14734	0	0	0.693638	0.715779	0.0221405	0.9568	0.983054	exon	ENST00000359637,ENST00000630130,ENST00000367429	ENSG00000000971	CFH	---	---	---	---	---
1:196675989|196690239	2.08091	2.62281	0	0	0	0	1.56791	0	-1.56791	0.224557	0.921644	exon	ENST00000359637,ENST00000630130,ENST00000367429	ENSG00000000971	CFH	hsa_circ_0015754	1	196675989	196690239	+
1:196675989|196715769	0	1.83985	0	1.44098	0	0	0.613285	0.480325	-0.132959	0.929157	0.977053	exon	ENST00000367429	ENSG00000000971	CFH	---	---	---	---	---
1:196677476|196690239	0	2.62281	0	0	0	0	0.874269	0	-0.874269	0.339128	0.921644	exon	ENST00000466229,ENST00000630130,ENST00000367429	ENSG00000000971	CFH	---	---	---	---	---
1:196677476|196715769	0	0	0	0	0	1.95955	0	0.653185	0.653185	0.485036	0.921644	exon	ENST00000466229,ENST00000367429	ENSG00000000971	CFH	---	---	---	---	---
1:196679623|196690239	1.38702	0	0	0	0	0	0.46234	0	-0.46234	0.58606	0.921644	exon	ENST00000359637,ENST00000466229,ENST00000630130,ENST00000367429	ENSG00000000971	CFH	---	---	---	---	---
1:196679623|196713917	1.38702	0	0	0	0	0	0.46234	0	-0.46234	0.58606	0.921644	exon	ENST00000466229,ENST00000367429	ENSG00000000971	CFH	---	---	---	---	---
1:196713735|196728522	0	0	0	0	2.03388	0	0	0.677962	0.677962	0.50093	0.921644	exon	ENST00000466229,ENST00000367429	ENSG00000000971	CFH	---	---	---	---	---
1:196715593|196726940	3.1822	0	0	0	2.03388	0	1.06073	0.677962	-0.382771	0.67814	0.921644	exon	ENST00000466229,ENST00000367429	ENSG00000000971	CFH	---	---	---	---	---
1:196725121|196728522	2.08091	0	0	0	0	0	0.693638	0	-0.693638	0.429293	0.921644	exon	ENST00000466229,ENST00000367429	ENSG00000000971	CFH	---	---	---	---	---
1:196736824|196752172	2.08091	0	0	0	0	0	0.693638	0	-0.693638	0.429293	0.921644	exon_intron	ENST00000466229,ENST00000367429,ENST00000470918	ENSG00000000971	CFH	---	---	---	---	---
1:197172160|197191899	2.54748	3.50067	3.22039	2.74778	0	0	3.08951	0.915926	-2.17359	0.232627	0.921644	exon	ENST00000367405,ENST00000467322	ENSG00000177888	ZBTB41	---	---	---	---	---
1:197175010|197191899	0	1.83985	1.41363	0.652309	0	0	1.0845	0.217436	-0.86706	0.505168	0.921644	exon	ENST00000367405,ENST00000467322	ENSG00000177888	ZBTB41	---	---	---	---	---
1:197188292|197191899	0	1.83985	2.77067	0	0	0	1.53684	0	-1.53684	0.121795	0.921644	exon	ENST00000367405,ENST00000467322	ENSG00000177888	ZBTB41	---	---	---	---	---
1:197328422|197357013	0	0	1.41363	0	0	2.76104	0.471212	0.920346	0.449134	0.669762	0.921644	exon	ENST00000535699,ENST00000484075,ENST00000538660,ENST00000475659,ENST00000367400,ENST00000367399	ENSG00000134376	CRB1	---	---	---	---	---
1:19737372|19740941	0	0	1.41363	0	0	0	0.471212	0	-0.471212	0.566201	0.921644	exon	ENST00000294543,ENST00000375127,ENST00000489135	ENSG00000162542	TMCO4	---	---	---	---	---
1:19737372|19755766	0	0	1.41363	0	0	0	0.471212	0	-0.471212	0.566201	0.921644	exon	ENST00000294543,ENST00000375127,ENST00000489135	ENSG00000162542	TMCO4	hsa_circ_0010409	1	19737372	19755766	-
1:197539964|197553112	2.08091	0	0	0	2.84602	1.28966	0.693638	1.37856	0.684921	0.668852	0.921644	exon	ENST00000620048,ENST00000391979	ENSG00000213047	DENND1B	---	---	---	---	---
1:197539964|197583253	0	0	0	0.652309	0	1.28966	0	0.647324	0.647324	0.555025	0.921644	exon	ENST00000620048	ENSG00000213047	DENND1B	---	---	---	---	---
1:197545922|197611976	0	0	0	1.71665	3.74203	0	0	1.81956	1.81956	0.191101	0.921644	exon	ENST00000620048,ENST00000294737	ENSG00000213047	DENND1B	---	---	---	---	---
1:197553022|197617759	0	0	0	0.652309	0	0	0	0.217436	0.217436	0.781429	0.921644	exon	ENST00000367396,ENST00000235453,ENST00000620048	ENSG00000213047	DENND1B	---	---	---	---	---
1:197553022|197674169	1.38702	0	0	0	0	0	0.46234	0	-0.46234	0.58606	0.921644	exon	ENST00000367396,ENST00000235453,ENST00000620048	ENSG00000213047	DENND1B	---	---	---	---	---
1:197553022|197715074	0	0	1.41363	0	0	0	0.471212	0	-0.471212	0.566201	0.921644	exon	ENST00000367396,ENST00000235453,ENST00000620048	ENSG00000213047	DENND1B	---	---	---	---	---
1:19755634|19787117	0	0	2.11375	1.44098	0	0	0.704583	0.480325	-0.224258	0.807741	0.93419	exon	ENST00000496528,ENST00000294543,ENST00000375127	ENSG00000162542	TMCO4	hsa_circ_0005068	1	19755634	19787117	-
1:197583152|197595333	0	2.62281	0	0	0	0	0.874269	0	-0.874269	0.339128	0.921644	exon	ENST00000367396,ENST00000235453,ENST00000620048	ENSG00000213047	DENND1B	---	---	---	---	---
1:197583152|197607174	0	0	0	0	2.84602	0	0	0.948672	0.948672	0.330659	0.921644	exon	ENST00000367396,ENST00000235453,ENST00000620048	ENSG00000213047	DENND1B	---	---	---	---	---
5:73074742|73077493	7.3589	7.28341	6.78132	7.92375	7.65949	5.80475	7.14121	7.12933	-0.0118779	0.765638	0.921644	exon	ENST00000430046,ENST00000512348	ENSG00000157107	FCHO2	hsa_circ_0002490	5	73074742	73077493	+
1:197583152|197617759	2.08091	0	2.58309	1.09988	2.03388	0	1.55467	1.04459	-0.510082	0.550479	0.921644	exon	ENST00000367396,ENST00000235453,ENST00000620048	ENSG00000213047	DENND1B	hsa_circ_0015779	1	197583152	197617759	-
1:197583152|197642821	0	0	1.80575	0	0	0	0.601917	0	-0.601917	0.475406	0.921644	exon	ENST00000367396,ENST00000235453,ENST00000620048	ENSG00000213047	DENND1B	---	---	---	---	---
1:197583152|197645743	0	0	2.11375	1.09988	3.3625	1.95955	0.704583	2.14064	1.43606	0.353752	0.921644	exon	ENST00000367396,ENST00000235453,ENST00000620048	ENSG00000213047	DENND1B	hsa_circ_0000168	1	197583152	197645743	-
1:197583152|197647114	0	0	0	0.652309	0	0	0	0.217436	0.217436	0.781429	0.921644	exon	ENST00000367396,ENST00000620048	ENSG00000213047	DENND1B	---	---	---	---	---
1:197583152|197652315	0	0	0	0.652309	0	0	0	0.217436	0.217436	0.781429	0.921644	exon	ENST00000367396,ENST00000235453,ENST00000620048	ENSG00000213047	DENND1B	---	---	---	---	---
1:197583152|197658369	1.38702	1.83985	2.11375	1.71665	0	0	1.78021	0.572217	-1.20799	0.499308	0.921644	exon	ENST00000367396,ENST00000235453,ENST00000620048	ENSG00000213047	DENND1B	---	---	---	---	---
1:197583152|197715074	2.54748	1.83985	0	1.44098	2.84602	0	1.46245	1.429	-0.033448	0.983851	0.99243	exon	ENST00000367396,ENST00000235453,ENST00000620048	ENSG00000213047	DENND1B	hsa_circ_0015780	1	197583152	197715074	-
1:197583152|197772932	1.38702	0	0	0	0	0	0.46234	0	-0.46234	0.58606	0.921644	exon	ENST00000367396,ENST00000235453,ENST00000620048	ENSG00000213047	DENND1B	hsa_circ_0015781	1	197583152	197772932	-
1:197595208|197617759	0	0	1.80575	0.652309	0	1.28966	0.601917	0.647324	0.0454067	0.913031	0.973517	exon	ENST00000367396,ENST00000235453,ENST00000620048,ENST00000294737	ENSG00000213047	DENND1B	hsa_circ_0015782	1	197595208	197617759	-
1:197595208|197652315	0	0	0.873449	0	0	0	0.29115	0	-0.29115	0.69286	0.921644	exon	ENST00000367396,ENST00000235453,ENST00000620048,ENST00000294737	ENSG00000213047	DENND1B	---	---	---	---	---
1:197595208|197658369	1.38702	0	1.80575	0	0	0	1.06426	0	-1.06426	0.337263	0.921644	exon	ENST00000367396,ENST00000235453,ENST00000620048,ENST00000294737	ENSG00000213047	DENND1B	hsa_circ_0015783	1	197595208	197658369	-
1:197595208|197715074	0	0	0	0	0	1.95955	0	0.653185	0.653185	0.485036	0.921644	exon	ENST00000367396,ENST00000235453,ENST00000620048,ENST00000294737	ENSG00000213047	DENND1B	hsa_circ_0008785	1	197595208	197715074	-
5:10415488|10417404	6.93255	7.07838	7.35092	7.38681	7.52049	7.74696	7.12061	7.55142	0.430805	0.119761	0.921644	exon	ENST00000449913,ENST00000511802,ENST00000512449,ENST00000510792,ENST00000274140,ENST00000505253,ENST00000503788	ENSG00000145495	2018-03-06	hsa_circ_0001467	5	10415488	10417404	+
1:197617659|197652315	0	1.83985	0	0	0	0	0.613285	0	-0.613285	0.494453	0.921644	exon	ENST00000367396,ENST00000496935,ENST00000235453,ENST00000620048,ENST00000294737	ENSG00000213047	DENND1B	---	---	---	---	---
10:7797047|7802854	7.12848	7.35335	6.87634	7.97382	6.68842	7.29488	7.11939	7.31904	0.19965	0.506651	0.921644	exon	ENST00000493053,ENST00000356708,ENST00000335698	ENSG00000165629	ATP5C1	hsa_circ_0007292	10	7797047	7802854	+
1:197617659|197715074	2.54748	0	0	0	0	0	0.849161	0	-0.849161	0.345815	0.921644	exon	ENST00000367396,ENST00000235453,ENST00000620048,ENST00000294737	ENSG00000213047	DENND1B	---	---	---	---	---
1:197617659|197772932	1.38702	0	0	0	0	1.28966	0.46234	0.429887	-0.0324521	0.980058	0.991303	exon	ENST00000367396,ENST00000235453,ENST00000620048,ENST00000294737	ENSG00000213047	DENND1B	---	---	---	---	---
9:125337018|125337591	6.85414	6.70307	7.79651	7.32127	7.59166	7.44597	7.11791	7.45297	0.335063	0.598076	0.921644	exon	ENST00000497580,ENST00000467750,ENST00000265956,ENST00000495955,ENST00000394083,ENST00000394105,ENST00000312123,ENST00000436712,ENST00000470056,ENST00000394104,ENST00000297933	ENSG00000165219	GAPVD1	hsa_circ_0003270	9	125337018	125337591	+
1:197642711|197672156	2.54748	0	0.873449	2.47857	2.84602	0	1.14031	1.77486	0.634552	0.64647	0.921644	exon	ENST00000367396,ENST00000235453,ENST00000620048,ENST00000294737	ENSG00000213047	DENND1B	hsa_circ_0015793	1	197642711	197672156	-
1:197642711|197674169	0	0	1.41363	0	0	2.76104	0.471212	0.920346	0.449134	0.669762	0.921644	exon	ENST00000367396,ENST00000235453,ENST00000620048,ENST00000294737	ENSG00000213047	DENND1B	---	---	---	---	---
7:24623666|24650712	7.33022	7.10566	6.91664	7.3005	6.9635	6.84714	7.11751	7.03705	-0.0804572	0.707268	0.921644	exon	ENST00000222644,ENST00000430180,ENST00000432190,ENST00000396475	ENSG00000105926	MPP6	hsa_circ_0001685	7	24623666	24650712	+
1:197645690|197672156	0	0	0	1.09988	0	0	0	0.366626	0.366626	0.661625	0.921644	exon	ENST00000367396,ENST00000422998,ENST00000235453,ENST00000620048,ENST00000294737	ENSG00000213047	DENND1B	---	---	---	---	---
1:197652235|197658369	0	0	0	0	0	2.76104	0	0.920346	0.920346	0.321336	0.921644	exon	ENST00000367396,ENST00000422998,ENST00000235453,ENST00000620048,ENST00000294737	ENSG00000213047	DENND1B	hsa_circ_0015796	1	197652235	197658369	-
1:197652235|197674169	1.38702	0	2.77067	1.09988	4.04223	0	1.3859	1.71404	0.328139	0.662988	0.921644	exon	ENST00000367396,ENST00000422998,ENST00000235453,ENST00000620048,ENST00000294737	ENSG00000213047	DENND1B	hsa_circ_0015797	1	197652235	197674169	-
18:9524594|9525851	7.0427	7.23482	7.06744	7.32127	7.03334	7.32119	7.11499	7.22527	0.110279	0.701646	0.921644	exon	ENST00000019317,ENST00000383432	ENSG00000017797	RALBP1	hsa_circ_0005158	18	9524594	9525851	+
1:197652235|197772932	2.54748	0	0	0	0	0	0.849161	0	-0.849161	0.345815	0.921644	exon	ENST00000367396,ENST00000422998,ENST00000235453,ENST00000620048,ENST00000294737	ENSG00000213047	DENND1B	---	---	---	---	---
1:197672037|197715074	0	0	2.36742	0	0	0	0.789141	0	-0.789141	0.368163	0.921644	exon	ENST00000367396,ENST00000294738,ENST00000235453,ENST00000620048,ENST00000294737	ENSG00000213047	DENND1B	hsa_circ_0015800	1	197672037	197715074	-
1:19771308|19787117	1.38702	0	0	0	0	0	0.46234	0	-0.46234	0.58606	0.921644	exon	ENST00000496528,ENST00000294543,ENST00000375127	ENSG00000162542	TMCO4	hsa_circ_0010411	1	19771308	19787117	-
1:19780580|19787117	0	0	1.41363	0	0	0	0.471212	0	-0.471212	0.566201	0.921644	exon	ENST00000496528,ENST00000294543,ENST00000375127,ENST00000488449	ENSG00000162542	TMCO4	---	---	---	---	---
1:198220999|198253180	0	2.62281	0	2.47857	0	3.47417	0.874269	1.98425	1.10998	0.57559	0.921644	exon	ENST00000391974	ENSG00000151414	NEK7	hsa_circ_0008593	1	198220999	198253180	+
7:152309966|152315338	7.02492	7.23482	7.03119	7.23083	7.44562	7.18459	7.09698	7.28701	0.190035	0.526657	0.921644	exon	ENST00000558084,ENST00000262189,ENST00000355193	ENSG00000055609	KMT2C	hsa_circ_0001769	7	152309966	152315338	-
1:198220999|198279061	0	0	0	0.652309	0	1.95955	0	0.870621	0.870621	0.421048	0.921644	exon_intron	ENST00000544035,ENST00000538004,ENST00000367385,ENST00000417895,ENST00000493790,ENST00000367383,ENST00000442588,ENST00000391974	ENSG00000151414	NEK7	---	---	---	---	---
1:198220999|198293039	0	0	0	0	0	2.41525	0	0.805084	0.805084	0.395572	0.921644	exon_intron	ENST00000544035,ENST00000538004,ENST00000367385,ENST00000417895,ENST00000493790,ENST00000367383,ENST00000442588,ENST00000391974	ENSG00000151414	NEK7	---	---	---	---	---
1:198220999|198297240	2.89947	2.62281	2.77067	2.47857	0	0	2.76432	0.826191	-1.93813	0.246269	0.921644	exon_intron	ENST00000544035,ENST00000538004,ENST00000367385,ENST00000417895,ENST00000493790,ENST00000367383,ENST00000442588,ENST00000391974	ENSG00000151414	NEK7	---	---	---	---	---
1:198232553|198253180	0	0	0	0	2.84602	0	0	0.948672	0.948672	0.330659	0.921644	exon	ENST00000538004,ENST00000367385,ENST00000367383,ENST00000391974	ENSG00000151414	NEK7	---	---	---	---	---
1:13731000|13742157	7.38702	6.70307	7.17103	7.15183	6.64446	6.98515	7.08704	6.92715	-0.159889	0.476953	0.921644	exon	ENST00000311066,ENST00000235372,ENST00000376048,ENST00000484063	ENSG00000116731	PRDM2	hsa_circ_0005986	1	13731000	13742157	+
1:20757166|20773610	7.19361	7.18453	6.82432	7.79969	7.49596	7.28155	7.06749	7.52573	0.458243	0.0807121	0.921644	exon	ENST00000419948,ENST00000375003,ENST00000312239,ENST00000438032	ENSG00000127483	HP1BP3	hsa_circ_0000024	1	20757166	20773610	-
1:198232553|198293039	2.08091	0	0	0	0	0	0.693638	0	-0.693638	0.429293	0.921644	exon	ENST00000538004,ENST00000367385	ENSG00000151414	NEK7	---	---	---	---	---
11:57491224|57491862	7.30096	7.10566	6.70283	6.92629	6.77251	6.50099	7.03648	6.73326	-0.30322	0.219252	0.921644	exon	ENST00000278426,ENST00000528450	ENSG00000149150	SLC43A1	hsa_circ_0005204	11	57491224	57491862	-
1:198253040|198264235	0	1.83985	0	0	0	1.28966	0.613285	0.429887	-0.183397	0.868635	0.953201	exon	ENST00000538004,ENST00000367385	ENSG00000151414	NEK7	hsa_circ_0008188	1	198253040	198264235	+
1:198253040|198279061	0	0	0.873449	1.94801	0	0	0.29115	0.649335	0.358186	0.703734	0.921644	exon	ENST00000538004,ENST00000367385	ENSG00000151414	NEK7	---	---	---	---	---
1:198253040|198293039	0	0	2.58309	0	0	0	0.861031	0	-0.861031	0.328374	0.921644	exon	ENST00000538004,ENST00000367385	ENSG00000151414	NEK7	hsa_circ_0015805	1	198253040	198293039	+
1:198262575|198279061	0	0	0	0	0	1.95955	0	0.653185	0.653185	0.485036	0.921644	exon	ENST00000538004,ENST00000367385	ENSG00000151414	NEK7	---	---	---	---	---
1:198262575|198297240	1.38702	0	1.41363	0	0	0	0.933551	0	-0.933551	0.398993	0.921644	exon	ENST00000538004,ENST00000367385	ENSG00000151414	NEK7	hsa_circ_0015806	1	198262575	198297240	+
1:198277961|198297240	1.38702	3.1275	4.14084	3.42204	0	3.03976	2.88512	2.15393	-0.731186	0.659431	0.921644	exon	ENST00000538004,ENST00000367385,ENST00000493790	ENSG00000151414	NEK7	hsa_circ_0006267	1	198277961	198297240	+
1:198278954|198297240	0	0	2.11375	0	3.3625	0	0.704583	1.12083	0.416248	0.739563	0.921644	exon	ENST00000538004,ENST00000367385,ENST00000493790	ENSG00000151414	NEK7	hsa_circ_0015808	1	198278954	198297240	+
1:19890385|19894480	1.38702	0	1.80575	0	0	0	1.06426	0	-1.06426	0.337263	0.921644	exon	ENST00000375120	ENSG00000169914	OTUD3	---	---	---	---	---
1:19890385|19897662	0	0	0	1.71665	0	0	0	0.572217	0.572217	0.523576	0.921644	exon	ENST00000375120	ENSG00000169914	OTUD3	---	---	---	---	---
1:19897540|19904987	0	0	0	0	0	1.28966	0	0.429887	0.429887	0.635324	0.921644	exon	ENST00000375120	ENSG00000169914	OTUD3	---	---	---	---	---
1:200043774|200120955	2.54748	0	0	0.652309	2.03388	0	0.849161	0.895398	0.0462373	0.829464	0.941209	exon	ENST00000367362,ENST00000236914,ENST00000544748	ENSG00000116833	NR5A2	hsa_circ_0015814	1	200043774	200120955	+
1:20059632|20086227	0	0	2.58309	1.94801	0	0	0.861031	0.649335	-0.211695	0.839997	0.941209	exon	ENST00000460175,ENST00000489871,ENST00000469069,ENST00000465698,ENST00000486277	ENSG00000127472	PLA2G5	---	---	---	---	---
1:200608830|200615609	0	0	0.873449	0	0	0	0.29115	0	-0.29115	0.69286	0.921644	exon	ENST00000614960,ENST00000367350	ENSG00000118193	KIF14	---	---	---	---	---
1:200614318|200618838	0	0	0	0	2.03388	0	0	0.677962	0.677962	0.50093	0.921644	exon	ENST00000367350	ENSG00000118193	KIF14	---	---	---	---	---
1:20063484|20086227	0	0	0	1.44098	0	0	0	0.480325	0.480325	0.5841	0.921644	exon	ENST00000469069	ENSG00000127472	PLA2G5	---	---	---	---	---
1:200648439|200649226	1.38702	0	0	0	0	0	0.46234	0	-0.46234	0.58606	0.921644	exon	ENST00000413408,ENST00000331314,ENST00000433235,ENST00000429498,ENST00000447706	ENSG00000118197	DDX59	---	---	---	---	---
1:200648439|200650676	2.08091	0	0	0	0	0	0.693638	0	-0.693638	0.429293	0.921644	exon	ENST00000331314,ENST00000433235,ENST00000447706	ENSG00000118197	DDX59	---	---	---	---	---
1:200648439|200659116	0	0	0	1.94801	0	1.28966	0	1.07922	1.07922	0.350143	0.921644	exon	ENST00000331314,ENST00000447706	ENSG00000118197	DDX59	---	---	---	---	---
1:200648439|200666751	0	0	1.80575	0	0	0	0.601917	0	-0.601917	0.475406	0.921644	exon	ENST00000331314,ENST00000447706	ENSG00000118197	DDX59	hsa_circ_0015832	1	200648439	200666751	-
1:200665937|200666751	2.08091	0	1.41363	1.09988	0	0	1.16485	0.366626	-0.798224	0.556697	0.921644	exon	ENST00000331314,ENST00000447706	ENSG00000118197	DDX59	---	---	---	---	---
1:20068873|20084870	0	1.83985	0	0	0	0	0.613285	0	-0.613285	0.494453	0.921644	exon	ENST00000460175,ENST00000489871,ENST00000469069,ENST00000465698,ENST00000486277	ENSG00000127472	PLA2G5	---	---	---	---	---
1:20068873|20086227	2.08091	2.62281	2.36742	1.09988	0	1.28966	2.35705	0.796513	-1.56054	0.191396	0.921644	exon	ENST00000460175,ENST00000489871,ENST00000469069,ENST00000465698,ENST00000486277	ENSG00000127472	PLA2G5	---	---	---	---	---
1:20070294|20086227	1.38702	0	0	0	0	0	0.46234	0	-0.46234	0.58606	0.921644	exon	ENST00000375108,ENST00000460175,ENST00000489871	ENSG00000127472	PLA2G5	---	---	---	---	---
1:200760839|200807537	2.89947	2.62281	0	2.61944	0	2.76104	1.84076	1.79349	-0.0472643	0.993249	0.996909	exon	ENST00000358823,ENST00000413307,ENST00000236925	ENSG00000118200	CAMSAP2	hsa_circ_0015838	1	200760839	200807537	+
5:145817894|145826200	7.50718	6.96379	6.60757	5.89024	6.17366	6.67426	7.02618	6.24605	-0.780129	0.00969293	0.921644	exon	ENST00000394450	ENSG00000186314	PRELID2	hsa_circ_0006528	5	145817894	145826200	-
1:200760839|200832845	2.54748	0	0	1.71665	2.03388	1.28966	0.849161	1.68007	0.830906	0.838807	0.941209	exon	ENST00000358823,ENST00000413307,ENST00000236925	ENSG00000118200	CAMSAP2	hsa_circ_0015840	1	200760839	200832845	+
1:200760839|200842087	2.54748	0	0	0	0	0	0.849161	0	-0.849161	0.345815	0.921644	exon	ENST00000358823,ENST00000413307,ENST00000236925	ENSG00000118200	CAMSAP2	---	---	---	---	---
1:200807376|200815644	1.38702	0	0	0	0	0	0.46234	0	-0.46234	0.58606	0.921644	exon	ENST00000358823,ENST00000413307,ENST00000236925	ENSG00000118200	CAMSAP2	hsa_circ_0015844	1	200807376	200815644	+
1:200807376|200832845	0	3.50067	2.11375	0.652309	0	0	1.87147	0.217436	-1.65404	0.0770063	0.921644	exon	ENST00000358823,ENST00000413307,ENST00000236925	ENSG00000118200	CAMSAP2	hsa_circ_0006265	1	200807376	200832845	+
1:200815561|200832845	0	0	0	0	0	1.28966	0	0.429887	0.429887	0.635324	0.921644	exon	ENST00000358823,ENST00000413307,ENST00000236925	ENSG00000118200	CAMSAP2	---	---	---	---	---
1:200844782|200853495	0	0	0	1.09988	0	0	0	0.366626	0.366626	0.661625	0.921644	exon	ENST00000358823,ENST00000413307,ENST00000236925	ENSG00000118200	CAMSAP2	---	---	---	---	---
1:201485283|201490344	0	0	3.83921	3.17049	2.03388	0	1.27974	1.73479	0.455055	0.921179	0.977053	exon	ENST00000367306,ENST00000340006,ENST00000532313,ENST00000533402,ENST00000530120,ENST00000524951,ENST00000533432,ENST00000532460,ENST00000527662	ENSG00000159176	CSRP1	hsa_circ_0003736	1	201485283	201490344	-
1:201712817|201718755	0	0	2.36742	0	0	0	0.789141	0	-0.789141	0.368163	0.921644	exon	ENST00000367302,ENST00000367296	ENSG00000134369	NAV1	hsa_circ_0002869	1	201712817	201718755	+
1:201847279|201848594	2.08091	1.83985	3.34375	1.71665	0	1.28966	2.42151	1.0021	-1.4194	0.205204	0.921644	exon	ENST00000464348,ENST00000361565	ENSG00000198700	IPO9	hsa_circ_0003115	1	201847279	201848594	+
1:201847279|201853097	0	0	0	2.32244	0	0	0	0.774146	0.774146	0.40131	0.921644	exon	ENST00000361565	ENSG00000198700	IPO9	---	---	---	---	---
1:201847279|201858994	0	1.83985	0	0	0	1.95955	0.613285	0.653185	0.0398999	0.943118	0.98174	exon	ENST00000361565	ENSG00000198700	IPO9	---	---	---	---	---
4:87195324|87195690	7.48133	7.37594	6.21372	6.56614	7.19444	6.81048	7.02366	6.85702	-0.166642	0.469775	0.921644	exon	ENST00000512111,ENST00000273963,ENST00000425278,ENST00000498875,ENST00000506985	ENSG00000145332	KLHL8	hsa_circ_0002538	4	87195324	87195690	-
1:201852104|201858553	1.38702	0	0	0	0	0	0.46234	0	-0.46234	0.58606	0.921644	exon	ENST00000361565	ENSG00000198700	IPO9	---	---	---	---	---
1:201852104|201858994	4.10045	2.62281	2.11375	3.25931	0	4.30606	2.94567	2.52179	-0.423882	0.897386	0.968118	exon	ENST00000361565	ENSG00000198700	IPO9	---	---	---	---	---
1:201852104|201871327	1.38702	0	0	0	0	0	0.46234	0	-0.46234	0.58606	0.921644	exon	ENST00000361565	ENSG00000198700	IPO9	---	---	---	---	---
1:201853011|201857194	0	0	0	0	2.03388	0	0	0.677962	0.677962	0.50093	0.921644	exon	ENST00000361565	ENSG00000198700	IPO9	---	---	---	---	---
1:201854595|201857194	2.08091	3.50067	3.08548	2.32244	0	1.28966	2.88902	1.20403	-1.68499	0.159614	0.921644	exon	ENST00000361565	ENSG00000198700	IPO9	hsa_circ_0003008	1	201854595	201857194	+
1:201854595|201858994	1.38702	0	0	2.14734	0	1.95955	0.46234	1.36896	0.906624	0.476224	0.921644	exon	ENST00000361565	ENSG00000198700	IPO9	hsa_circ_0015928	1	201854595	201858994	+
1:201857096|201858994	2.08091	3.1275	1.41363	1.94801	0	1.28966	2.20735	1.07922	-1.12813	0.38939	0.921644	exon	ENST00000361565	ENSG00000198700	IPO9	---	---	---	---	---
1:201857096|201868796	0	0	1.41363	0	0	0	0.471212	0	-0.471212	0.566201	0.921644	exon	ENST00000361565	ENSG00000198700	IPO9	---	---	---	---	---
1:201857096|201871327	0	0	0	0	2.03388	0	0	0.677962	0.677962	0.50093	0.921644	exon	ENST00000361565	ENSG00000198700	IPO9	hsa_circ_0015936	1	201857096	201871327	+
1:201857096|201874936	0	0	0	0	0	1.95955	0	0.653185	0.653185	0.485036	0.921644	exon	ENST00000361565	ENSG00000198700	IPO9	hsa_circ_0015938	1	201857096	201874936	+
1:201996147|201997554	0	0	0.873449	1.71665	0	0	0.29115	0.572217	0.281068	0.768855	0.921644	exon	ENST00000479726,ENST00000492849,ENST00000295640,ENST00000471105,ENST00000487116,ENST00000447312,ENST00000481780	ENSG00000176393	RNPEP	hsa_circ_0015957	1	201996147	201997554	+
1:201996147|202000015	0	0	0.873449	0	0	0	0.29115	0	-0.29115	0.69286	0.921644	exon	ENST00000492849,ENST00000295640,ENST00000492587,ENST00000478617,ENST00000471105,ENST00000447312,ENST00000481780	ENSG00000176393	RNPEP	---	---	---	---	---
1:201997319|202000015	0	0	0	0	0	1.28966	0	0.429887	0.429887	0.635324	0.921644	exon	ENST00000492849,ENST00000295640,ENST00000471105,ENST00000367286,ENST00000447312,ENST00000481780	ENSG00000176393	RNPEP	hsa_circ_0015962	1	201997319	202000015	+
1:201999902|202001767	1.38702	0	0	0	0	0	0.46234	0	-0.46234	0.58606	0.921644	exon	ENST00000492849,ENST00000295640,ENST00000478617,ENST00000471105,ENST00000367286,ENST00000447312	ENSG00000176393	RNPEP	hsa_circ_0015965	1	201999902	202001767	+
1:201999902|202003461	0	0	0	1.09988	0	0	0	0.366626	0.366626	0.661625	0.921644	exon	ENST00000295640,ENST00000471105,ENST00000367286	ENSG00000176393	RNPEP	---	---	---	---	---
3:134175609|134195182	6.63718	7.5449	6.87634	6.82809	5.47024	7.22694	7.01947	6.50842	-0.511046	0.477611	0.921644	exon	ENST00000460933,ENST00000620660,ENST00000623711	ENSG00000163785	RYK	hsa_circ_0003633	3	134175609	134195182	-
1:202157739|202158301	0	0	0	0	3.3625	0	0	1.12083	1.12083	0.271092	0.921644	exon	ENST00000309017,ENST00000435759,ENST00000367279,ENST00000495688,ENST00000486116,ENST00000467283,ENST00000464870,ENST00000477554,ENST00000492977,ENST00000476061	ENSG00000143851	PTPN7	---	---	---	---	---
1:202416787|202425725	0	0	0	0.652309	0	0	0	0.217436	0.217436	0.781429	0.921644	exon	ENST00000480184,ENST00000391959,ENST00000608999,ENST00000476364,ENST00000356764	ENSG00000077157	PPP1R12B	---	---	---	---	---
1:202416787|202428929	2.08091	1.83985	0	1.71665	2.03388	3.03976	1.30692	2.26343	0.956509	0.453752	0.921644	exon	ENST00000480184,ENST00000391959,ENST00000608999,ENST00000476364,ENST00000356764	ENSG00000077157	PPP1R12B	hsa_circ_0015980	1	202416787	202428929	+
1:202416787|202449171	0	0	0	0.652309	0	2.76104	0	1.13778	1.13778	0.237178	0.921644	exon	ENST00000391959,ENST00000608999	ENSG00000077157	PPP1R12B	---	---	---	---	---
1:202422620|202427184	0	0	2.58309	0	0	0	0.861031	0	-0.861031	0.328374	0.921644	exon	ENST00000480184,ENST00000391959,ENST00000608999,ENST00000356764	ENSG00000077157	PPP1R12B	---	---	---	---	---
1:202422620|202449171	2.89947	1.83985	1.41363	2.32244	0	0	2.05099	0.774146	-1.27684	0.506173	0.921644	exon	ENST00000391959,ENST00000608999	ENSG00000077157	PPP1R12B	hsa_circ_0015985	1	202422620	202449171	+
1:202425566|202431619	0	1.83985	0	2.61944	2.03388	0	0.613285	1.55111	0.937825	0.450085	0.921644	exon	ENST00000480184,ENST00000391959,ENST00000608999,ENST00000476364,ENST00000356764	ENSG00000077157	PPP1R12B	---	---	---	---	---
1:202427040|202431619	0	1.83985	1.41363	0	0	0	1.0845	0	-1.0845	0.338508	0.921644	exon	ENST00000480184,ENST00000391959,ENST00000608999,ENST00000476364,ENST00000356764,ENST00000466968	ENSG00000077157	PPP1R12B	---	---	---	---	---
1:202427040|202449171	2.08091	2.62281	0.873449	1.09988	0	2.41525	1.85906	1.17171	-0.687348	0.697593	0.921644	exon	ENST00000391959,ENST00000608999	ENSG00000077157	PPP1R12B	---	---	---	---	---
1:202428855|202431619	0	0	2.36742	0.652309	0	1.28966	0.789141	0.647324	-0.141817	0.723755	0.921644	exon	ENST00000480184,ENST00000391959,ENST00000608999,ENST00000476364,ENST00000356764,ENST00000488330,ENST00000466968	ENSG00000077157	PPP1R12B	---	---	---	---	---
1:202428855|202434768	1.38702	1.83985	0	2.14734	0	1.95955	1.07562	1.36896	0.293339	0.735853	0.921644	exon	ENST00000480184,ENST00000391959,ENST00000608999,ENST00000476364,ENST00000488330	ENSG00000077157	PPP1R12B	---	---	---	---	---
1:202428855|202449171	0	1.83985	0	0	0	0	0.613285	0	-0.613285	0.494453	0.921644	exon	ENST00000391959,ENST00000608999	ENSG00000077157	PPP1R12B	---	---	---	---	---
1:202431480|202449171	0	0	0	0	0	1.28966	0	0.429887	0.429887	0.635324	0.921644	exon	ENST00000391959,ENST00000608999	ENSG00000077157	PPP1R12B	---	---	---	---	---
1:202437821|202445228	0	0	2.36742	0	0	0	0.789141	0	-0.789141	0.368163	0.921644	exon	ENST00000391959	ENSG00000077157	PPP1R12B	---	---	---	---	---
1:202437821|202449171	0	0	0	0	0	1.95955	0	0.653185	0.653185	0.485036	0.921644	exon	ENST00000391959,ENST00000608999	ENSG00000077157	PPP1R12B	---	---	---	---	---
1:202440706|202449171	0	0	1.41363	0.652309	0	0	0.471212	0.217436	-0.253775	0.800965	0.931732	exon	ENST00000391959,ENST00000608999	ENSG00000077157	PPP1R12B	---	---	---	---	---
1:202448989|202496822	2.08091	1.83985	3.45739	2.47857	0	2.41525	2.45939	1.63127	-0.828112	0.537001	0.921644	exon	ENST00000391959,ENST00000608999,ENST00000498070	ENSG00000077157	PPP1R12B	---	---	---	---	---
1:202488533|202496822	0	0	0	1.44098	0	0	0	0.480325	0.480325	0.5841	0.921644	exon	ENST00000391959,ENST00000608999,ENST00000498070,ENST00000290419,ENST00000491336	ENSG00000077157	PPP1R12B	hsa_circ_0015992	1	202488533	202496822	+
1:202493114|202496822	1.38702	0	0	0	0	0	0.46234	0	-0.46234	0.58606	0.921644	exon	ENST00000391959,ENST00000608999,ENST00000498070,ENST00000290419,ENST00000491336	ENSG00000077157	PPP1R12B	---	---	---	---	---
1:202558877|202569197	0	1.83985	1.41363	1.44098	0	0	1.0845	0.480325	-0.604171	0.720659	0.921644	exon	ENST00000391959,ENST00000608999,ENST00000634903,ENST00000290419,ENST00000491336	ENSG00000077157	PPP1R12B	---	---	---	---	---
1:202562778|202569197	1.38702	3.1275	2.36742	1.44098	2.84602	0	2.29398	1.429	-0.864985	0.501403	0.921644	exon	ENST00000391959,ENST00000608999,ENST00000634903,ENST00000290419,ENST00000491336	ENSG00000077157	PPP1R12B	---	---	---	---	---
1:202742391|202749139	0	0	0	0.652309	0	0	0	0.217436	0.217436	0.781429	0.921644	exon	ENST00000235790,ENST00000367265,ENST00000367264	ENSG00000117139	KDM5B	hsa_circ_0016019	1	202742391	202749139	-
1:202745858|202767060	0	0	2.58309	0	0	0	0.861031	0	-0.861031	0.328374	0.921644	exon	ENST00000235790,ENST00000367265,ENST00000367264	ENSG00000117139	KDM5B	---	---	---	---	---
1:202746142|202750778	0	0	0	1.44098	0	0	0	0.480325	0.480325	0.5841	0.921644	exon	ENST00000235790,ENST00000367265,ENST00000367264	ENSG00000117139	KDM5B	---	---	---	---	---
1:202748945|202753067	0	0	1.80575	0	0	0	0.601917	0	-0.601917	0.475406	0.921644	exon	ENST00000235790,ENST00000367265,ENST00000367264	ENSG00000117139	KDM5B	---	---	---	---	---
1:202750659|202758510	0	0	0	0.652309	3.3625	1.95955	0	1.99145	1.99145	0.037626	0.921644	exon	ENST00000235790,ENST00000367265,ENST00000367264	ENSG00000117139	KDM5B	hsa_circ_0016031	1	202750659	202758510	-
1:202755271|202758510	2.08091	0	3.08548	1.44098	3.3625	2.41525	1.72213	2.40624	0.684109	0.834647	0.941209	exon	ENST00000235790,ENST00000456180,ENST00000367265,ENST00000367264	ENSG00000117139	KDM5B	hsa_circ_0016039	1	202755271	202758510	-
8:47396376|47407961	8.08949	6.9933	5.96742	6.10915	5.90222	5.87746	7.01674	5.96294	-1.05379	0.026253	0.921644	exon	ENST00000521918,ENST00000524141,ENST00000541342,ENST00000297423,ENST00000521214,ENST00000522117,ENST00000523814,ENST00000518074	ENSG00000164808	SPIDR	hsa_circ_0001798	8	47396376	47407961	+
1:202755271|202764145	3.1822	1.83985	3.08548	3.76309	0	3.27325	2.70251	2.34545	-0.357062	0.791387	0.928574	exon	ENST00000235790,ENST00000367265,ENST00000367264	ENSG00000117139	KDM5B	hsa_circ_0004981	1	202755271	202764145	-
1:202755271|202767060	0	0	0	0.652309	0	0	0	0.217436	0.217436	0.781429	0.921644	exon	ENST00000235790,ENST00000367265,ENST00000367264	ENSG00000117139	KDM5B	hsa_circ_0016041	1	202755271	202767060	-
1:202755271|202773288	1.38702	0	0	0	0	0	0.46234	0	-0.46234	0.58606	0.921644	exon	ENST00000235790,ENST00000367265,ENST00000367264	ENSG00000117139	KDM5B	---	---	---	---	---
1:202760415|202767060	1.38702	0	0	0	2.03388	0	0.46234	0.677962	0.215622	0.858511	0.949777	exon	ENST00000235790,ENST00000367265,ENST00000367264	ENSG00000117139	KDM5B	---	---	---	---	---
1:202762699|202773288	0	0	0	1.09988	2.03388	0	0	1.04459	1.04459	0.386055	0.921644	exon	ENST00000235790,ENST00000367265,ENST00000367264	ENSG00000117139	KDM5B	---	---	---	---	---
1:202766926|202777094	0	0	0	1.09988	0	0	0	0.366626	0.366626	0.661625	0.921644	exon	ENST00000235790,ENST00000367265,ENST00000367264	ENSG00000117139	KDM5B	---	---	---	---	---
1:202773118|202774735	0	0	0	1.09988	0	1.95955	0	1.01981	1.01981	0.374354	0.921644	exon	ENST00000235790,ENST00000367265,ENST00000367264,ENST00000602511	ENSG00000117139	KDM5B	hsa_circ_0016049	1	202773118	202774735	-
2:54982515|54987698	6.97021	6.5526	7.51084	6.76882	7.03334	7.45787	7.01122	7.08668	0.0754607	0.969316	0.98778	exon	ENST00000337526,ENST00000404909,ENST00000402434,ENST00000317610,ENST00000438462,ENST00000357376,ENST00000405240,ENST00000357732,ENST00000394611,ENST00000394609	ENSG00000115310	RTN4	hsa_circ_0001006	2	54982515	54987698	-
1:202893239|202895717	0	0	2.11375	0	0	2.76104	0.704583	0.920346	0.215762	0.851796	0.947397	exon	ENST00000367261	ENSG00000117153	KLHL12	---	---	---	---	---
1:202894184|202896960	0	0	0	1.09988	0	0	0	0.366626	0.366626	0.661625	0.921644	exon	ENST00000367261,ENST00000367259	ENSG00000117153	KLHL12	---	---	---	---	---
1:202943758|202946610	2.08091	0	0	0	0	1.28966	0.693638	0.429887	-0.263751	0.776051	0.921644	exon	ENST00000367254,ENST00000340990	ENSG00000159346	ADIPOR1	hsa_circ_0016055	1	202943758	202946610	-
1:202948304|202954307	0	1.83985	0	0	0	0	0.613285	0	-0.613285	0.494453	0.921644	exon	ENST00000417068,ENST00000426229	ENSG00000159346	ADIPOR1	---	---	---	---	---
1:202950930|202954307	0	0	0	0.652309	0	1.28966	0	0.647324	0.647324	0.555025	0.921644	exon	ENST00000417068,ENST00000426229	ENSG00000159346	ADIPOR1	---	---	---	---	---
1:203682742|203683398	0	0	0	0	0	1.95955	0	0.653185	0.653185	0.485036	0.921644	exon	ENST00000357681,ENST00000367218	ENSG00000058668	ATP2B4	hsa_circ_0004290	1	203682742	203683398	+
1:203699460|203708104	0	0	0.873449	0	0	0	0.29115	0	-0.29115	0.69286	0.921644	exon	ENST00000357681,ENST00000367218,ENST00000341360	ENSG00000058668	ATP2B4	---	---	---	---	---
1:203703652|203722689	2.54748	3.50067	0.873449	0	0	1.28966	2.3072	0.429887	-1.87731	0.0635487	0.921644	exon	ENST00000357681,ENST00000367218,ENST00000341360	ENSG00000058668	ATP2B4	hsa_circ_0002815	1	203703652	203722689	+
4:105424196|105456745	7.19361	7.15872	6.6796	7.0497	6.73108	6.22265	7.01064	6.66781	-0.342833	0.252345	0.921644	exon	ENST00000502833,ENST00000432483,ENST00000508518,ENST00000348706,ENST00000510015,ENST00000457404,ENST00000341695,ENST00000509031,ENST00000509426	ENSG00000138777	PPA2	hsa_circ_0001434	4	105424196	105456745	-
1:203707009|203714277	1.38702	0	3.08548	0	0	0	1.49083	0	-1.49083	0.185046	0.921644	exon	ENST00000357681,ENST00000367218,ENST00000341360	ENSG00000058668	ATP2B4	hsa_circ_0016083	1	203707009	203714277	+
1:203707862|203712139	1.38702	0	0	0	0	2.76104	0.46234	0.920346	0.458006	0.648887	0.921644	exon	ENST00000357681,ENST00000367218,ENST00000341360	ENSG00000058668	ATP2B4	---	---	---	---	---
1:203710877|203714277	0	2.62281	0	0	0	0	0.874269	0	-0.874269	0.339128	0.921644	exon	ENST00000357681,ENST00000367218,ENST00000341360	ENSG00000058668	ATP2B4	hsa_circ_0002827	1	203710877	203714277	+
4:147939825|147966839	6.85414	6.96379	7.21209	6.83533	7.16363	7.28155	7.01001	7.0935	0.0834944	0.904266	0.969803	exon	ENST00000506054,ENST00000507661,ENST00000336498	ENSG00000071205	ARHGAP10	hsa_circ_0007265	4	147939825	147966839	+
1:203713165|203722689	0	0	0	0	2.84602	0	0	0.948672	0.948672	0.330659	0.921644	exon	ENST00000357681,ENST00000367218,ENST00000341360	ENSG00000058668	ATP2B4	hsa_circ_0016096	1	203713165	203722689	+
1:203720549|203721410	0	1.83985	0	0	0	2.41525	0.613285	0.805084	0.191799	0.796495	0.931281	exon	ENST00000357681,ENST00000367218,ENST00000341360	ENSG00000058668	ATP2B4	hsa_circ_0016101	1	203720549	203721410	+
1:203720549|203722689	2.08091	0	2.58309	1.09988	4.2906	1.95955	1.55467	2.45001	0.895341	0.363549	0.921644	exon	ENST00000357681,ENST00000367218,ENST00000341360	ENSG00000058668	ATP2B4	hsa_circ_0016102	1	203720549	203722689	+
1:203723881|203727571	2.08091	1.83985	0	0	0	2.41525	1.30692	0.805084	-0.501839	0.876336	0.95799	exon	ENST00000357681,ENST00000367218,ENST00000341360	ENSG00000058668	ATP2B4	---	---	---	---	---
1:203770828|203772147	0	0	0	0	0	3.03976	0	1.01325	1.01325	0.298236	0.921644	exon	ENST00000367215,ENST00000367217,ENST00000442561	ENSG00000122188	LAX1	hsa_circ_0016105	1	203770828	203772147	+
1:203816926|203818689	2.89947	2.62281	1.80575	2.47857	0	1.95955	2.44268	1.47938	-0.9633	0.562749	0.921644	exon	ENST00000367212,ENST00000495527,ENST00000453771,ENST00000332127,ENST00000367210,ENST00000545588,ENST00000367214	ENSG00000058673	ZC3H11A	hsa_circ_0003639	1	203816926	203818689	+
1:203816926|203829654	2.08091	0	2.36742	1.44098	0	2.41525	1.48278	1.28541	-0.19737	0.866486	0.953201	exon	ENST00000367212,ENST00000495527,ENST00000453771,ENST00000332127,ENST00000367210,ENST00000545588,ENST00000367214	ENSG00000058673	ZC3H11A	hsa_circ_0016107	1	203816926	203829654	+
1:203816926|203830203	1.38702	0	0	0	0	0	0.46234	0	-0.46234	0.58606	0.921644	exon	ENST00000367212,ENST00000495527,ENST00000453771,ENST00000332127,ENST00000367210,ENST00000545588,ENST00000367214	ENSG00000058673	ZC3H11A	---	---	---	---	---
1:203816926|203831771	0	1.83985	0	1.94801	0	0	0.613285	0.649335	0.0360506	0.922066	0.977053	exon	ENST00000367212,ENST00000495527,ENST00000453771,ENST00000332127,ENST00000367210,ENST00000545588,ENST00000367214	ENSG00000058673	ZC3H11A	---	---	---	---	---
1:203816926|203833853	0	0	0	1.44098	0	0	0	0.480325	0.480325	0.5841	0.921644	exon	ENST00000367212,ENST00000495527,ENST00000453771,ENST00000332127,ENST00000367210,ENST00000545588,ENST00000367214	ENSG00000058673	ZC3H11A	---	---	---	---	---
1:203816926|203838064	1.38702	0	0	0	0	0	0.46234	0	-0.46234	0.58606	0.921644	exon	ENST00000367212,ENST00000495527,ENST00000453771,ENST00000332127,ENST00000367210,ENST00000545588,ENST00000367214	ENSG00000058673	ZC3H11A	---	---	---	---	---
1:203816926|203840374	2.08091	1.83985	0	1.71665	0	0	1.30692	0.572217	-0.734706	0.675665	0.921644	exon	ENST00000367212,ENST00000495527,ENST00000453771,ENST00000332127,ENST00000367210,ENST00000545588,ENST00000367214	ENSG00000058673	ZC3H11A	---	---	---	---	---
1:203828299|203830203	0	1.83985	0	0	0	0	0.613285	0	-0.613285	0.494453	0.921644	exon	ENST00000367212,ENST00000495527,ENST00000453771,ENST00000332127,ENST00000367210,ENST00000545588,ENST00000367214	ENSG00000058673	ZC3H11A	---	---	---	---	---
1:203828299|203831771	1.38702	1.83985	0	2.32244	2.03388	1.28966	1.07562	1.882	0.806371	0.548181	0.921644	exon	ENST00000367212,ENST00000495527,ENST00000453771,ENST00000332127,ENST00000367210,ENST00000545588,ENST00000367214	ENSG00000058673	ZC3H11A	---	---	---	---	---
1:203828299|203833853	0	1.83985	0	0	0	0	0.613285	0	-0.613285	0.494453	0.921644	exon	ENST00000367212,ENST00000495527,ENST00000453771,ENST00000332127,ENST00000367210,ENST00000545588,ENST00000367214	ENSG00000058673	ZC3H11A	---	---	---	---	---
1:203828299|203838064	0	0	0.873449	0	0	0	0.29115	0	-0.29115	0.69286	0.921644	exon	ENST00000367212,ENST00000495527,ENST00000453771,ENST00000332127,ENST00000367210,ENST00000545588,ENST00000367214	ENSG00000058673	ZC3H11A	---	---	---	---	---
1:203828299|203840374	2.54748	1.83985	1.80575	0	3.3625	0	2.06436	1.12083	-0.943531	0.883906	0.960332	exon	ENST00000367212,ENST00000495527,ENST00000453771,ENST00000332127,ENST00000367210,ENST00000545588,ENST00000367214	ENSG00000058673	ZC3H11A	hsa_circ_0007684	1	203828299	203840374	+
1:203833791|203840374	0	0	0	0	0	1.28966	0	0.429887	0.429887	0.635324	0.921644	exon	ENST00000367212,ENST00000495527,ENST00000453771,ENST00000332127,ENST00000367210,ENST00000545588,ENST00000367214	ENSG00000058673	ZC3H11A	hsa_circ_0016113	1	203833791	203840374	+
1:203847184|203847687	0	0	0	0	0	2.41525	0	0.805084	0.805084	0.395572	0.921644	exon	ENST00000367212,ENST00000495527,ENST00000453771,ENST00000332127,ENST00000367210,ENST00000545588,ENST00000367214	ENSG00000058673	ZC3H11A	hsa_circ_0016115	1	203847184	203847687	+
1:203847184|203848407	0	1.83985	0	0	0	0	0.613285	0	-0.613285	0.494453	0.921644	exon	ENST00000367212,ENST00000495527,ENST00000332127,ENST00000367210,ENST00000545588,ENST00000367214	ENSG00000058673	ZC3H11A	---	---	---	---	---
6:136151160|136155758	6.61357	6.14268	8.26689	6.36069	6.29235	6.71451	7.00771	6.45585	-0.551862	0.178787	0.921644	exon	ENST00000308191,ENST00000615259,ENST00000446774	ENSG00000171408	PDE7B	hsa_circ_0002198	6	136151160	136155758	+
1:204112915|204117707	2.08091	2.62281	0	2.97456	2.84602	3.8076	1.56791	3.20939	1.64149	0.125075	0.921644	exon	ENST00000367203,ENST00000367204	ENSG00000143842	SOX13	hsa_circ_0003600	1	204112915	204117707	+
1:204116507|204117707	1.38702	0	0.873449	1.44098	2.84602	0	0.753489	1.429	0.675508	0.517334	0.921644	exon	ENST00000272193,ENST00000367203,ENST00000367204,ENST00000480326,ENST00000618875	ENSG00000143842	SOX13	hsa_circ_0016123	1	204116507	204117707	+
1:204121900|204124857	0	2.62281	0	0	0	0	0.874269	0	-0.874269	0.339128	0.921644	exon	ENST00000272193,ENST00000367204,ENST00000618875	ENSG00000143842	SOX13	---	---	---	---	---
1:204141315|204149962	0	0	1.80575	0	0	0	0.601917	0	-0.601917	0.475406	0.921644	exon	ENST00000367202,ENST00000367201	ENSG00000143845	ETNK2	---	---	---	---	---
1:204161438|204162012	0	0	1.80575	0	0	0	0.601917	0	-0.601917	0.475406	0.921644	intron	ENST00000272190,ENST00000638118	ENSG00000143839	REN	---	---	---	---	---
1:204228083|204241814	0	0	0	0	0	1.95955	0	0.653185	0.653185	0.485036	0.921644	exon	ENST00000637508,ENST00000272203,ENST00000414478	ENSG00000143850	PLEKHA6	---	---	---	---	---
1:204267475|204274809	0	0	2.36742	1.71665	0	0	0.789141	0.572217	-0.216924	0.803436	0.932343	exon	ENST00000637508,ENST00000272203,ENST00000414478	ENSG00000143850	PLEKHA6	---	---	---	---	---
1:204427648|204430038	0	1.83985	0	0	2.84602	1.95955	0.613285	1.60186	0.988572	0.442522	0.921644	exon	ENST00000424712,ENST00000367187	ENSG00000133056	PIK3C2B	---	---	---	---	---
1:204433793|204439071	0	0	0	1.09988	0	0	0	0.366626	0.366626	0.661625	0.921644	exon	ENST00000424712,ENST00000367187	ENSG00000133056	PIK3C2B	---	---	---	---	---
1:204438935|204440321	0	0	0	0.652309	0	0	0	0.217436	0.217436	0.781429	0.921644	exon	ENST00000424712,ENST00000367187	ENSG00000133056	PIK3C2B	---	---	---	---	---
1:204464012|204469886	0	2.62281	0	0	0	0	0.874269	0	-0.874269	0.339128	0.921644	exon	ENST00000424712,ENST00000367187	ENSG00000133056	PIK3C2B	hsa_circ_0016155	1	204464012	204469886	-
1:204468870|204469886	2.08091	0	2.58309	3.42204	0	1.95955	1.55467	1.79387	0.239197	0.683996	0.921644	exon	ENST00000424712,ENST00000367187	ENSG00000133056	PIK3C2B	hsa_circ_0000174	1	204468870	204469886	-
1:204525484|204532246	0	1.83985	3.22039	2.61944	0	1.95955	1.68675	1.52633	-0.160414	0.803972	0.93282	exon	ENST00000621032,ENST00000391947,ENST00000367182,ENST00000463049,ENST00000470797,ENST00000470908,ENST00000616250,ENST00000454264	ENSG00000198625	MDM4	hsa_circ_0016158	1	204525484	204532246	+
1:204525484|204538308	0	0	2.93665	0	0	0	0.978882	0	-0.978882	0.233967	0.921644	exon	ENST00000614459,ENST00000621032,ENST00000391947,ENST00000367182,ENST00000463049,ENST00000470908,ENST00000471783,ENST00000454264	ENSG00000198625	MDM4	---	---	---	---	---
1:204530684|204538308	0	0	1.41363	1.71665	0	0	0.471212	0.572217	0.101006	0.908401	0.971481	exon	ENST00000621032,ENST00000391947,ENST00000367182,ENST00000463049,ENST00000470908,ENST00000507825,ENST00000454264	ENSG00000198625	MDM4	---	---	---	---	---
1:204950557|204982020	0	1.83985	0	0	0	0	0.613285	0	-0.613285	0.494453	0.921644	exon	ENST00000367173,ENST00000504476,ENST00000401399,ENST00000339876	ENSG00000163531	NFASC	---	---	---	---	---
1:204950557|204984142	0	0	0	0	2.03388	0	0	0.677962	0.677962	0.50093	0.921644	exon	ENST00000504476	ENSG00000163531	NFASC	---	---	---	---	---
1:204952011|204991306	0	0	0.873449	0	0	0	0.29115	0	-0.29115	0.69286	0.921644	exon	ENST00000367173,ENST00000539706,ENST00000404907,ENST00000401399,ENST00000404076,ENST00000430393,ENST00000339876	ENSG00000163531	NFASC	---	---	---	---	---
1:204952011|205002748	1.38702	0	0	1.44098	0	0	0.46234	0.480325	0.0179858	0.959736	0.983054	exon	ENST00000401399,ENST00000339876	ENSG00000163531	NFASC	---	---	---	---	---
1:204987418|204988806	0	0	0	0	0	2.41525	0	0.805084	0.805084	0.395572	0.921644	exon	ENST00000367173,ENST00000513543,ENST00000539706,ENST00000425360,ENST00000404907,ENST00000495396,ENST00000504476,ENST00000401399,ENST00000404076,ENST00000512826,ENST00000430393,ENST00000339876,ENST00000360049,ENST00000404977	ENSG00000163531	NFASC	---	---	---	---	---
1:205001170|205012866	1.38702	0	0	0	0	0	0.46234	0	-0.46234	0.58606	0.921644	exon	ENST00000401399,ENST00000413225,ENST00000339876	ENSG00000163531	NFASC	---	---	---	---	---
1:205002596|205012866	0	0	0	0.652309	0	0	0	0.217436	0.217436	0.781429	0.921644	exon	ENST00000495396,ENST00000401399,ENST00000413225,ENST00000339876	ENSG00000163531	NFASC	---	---	---	---	---
1:205103857|205105168	2.54748	0	0	0.652309	0	3.27325	0.849161	1.30852	0.459361	0.75611	0.921644	exon	ENST00000367164,ENST00000264515	ENSG00000117222	RBBP5	hsa_circ_0003527	1	205103857	205105168	-
1:205103857|205115883	0	0	0	0	0	1.28966	0	0.429887	0.429887	0.635324	0.921644	exon	ENST00000367164,ENST00000264515	ENSG00000117222	RBBP5	---	---	---	---	---
1:205157273|205160270	0	2.62281	0	0	0	0	0.874269	0	-0.874269	0.339128	0.921644	exon	ENST00000367161,ENST00000367162	ENSG00000133059	DSTYK	---	---	---	---	---
1:205159547|205169832	0	1.83985	0	0	0	0	0.613285	0	-0.613285	0.494453	0.921644	exon	ENST00000367161,ENST00000367162	ENSG00000133059	DSTYK	hsa_circ_0016190	1	205159547	205169832	-
1:205161258|205163955	2.89947	0	1.80575	2.14734	0	0	1.56841	0.715779	-0.852627	0.566769	0.921644	exon	ENST00000367161,ENST00000367162	ENSG00000133059	DSTYK	---	---	---	---	---
1:205162923|205163955	0	0	0	2.47857	0	0	0	0.826191	0.826191	0.374623	0.921644	exon	ENST00000367161,ENST00000367162	ENSG00000133059	DSTYK	---	---	---	---	---
1:205169163|205187806	2.08091	1.83985	0.873449	2.47857	0	1.28966	1.59807	1.25608	-0.341995	0.99622	0.998518	exon	ENST00000367161,ENST00000367162	ENSG00000133059	DSTYK	hsa_circ_0016199	1	205169163	205187806	-
1:205187418|205187806	0	1.83985	0	1.94801	0	0	0.613285	0.649335	0.0360506	0.922066	0.977053	exon	ENST00000367161,ENST00000367162	ENSG00000133059	DSTYK	hsa_circ_0016201	1	205187418	205187806	-
1:205268950|205269884	4.10045	0	3.56273	1.71665	2.03388	2.76104	2.55439	2.17052	-0.38387	0.209006	0.921644	exon	ENST00000358024,ENST00000481950,ENST00000637895,ENST00000545499,ENST00000329800,ENST00000495538,ENST00000330675	ENSG00000133069	TMCC2	hsa_circ_0003344	1	205268950	205269884	+
1:205338495|205339808	0	0	0	1.09988	0	0	0	0.366626	0.366626	0.661625	0.921644	exon	ENST00000606181,ENST00000539253,ENST00000367155,ENST00000367156,ENST00000460687	ENSG00000162873	KLHDC8A	---	---	---	---	---
1:205379054|205382144	0	0	2.36742	0	0	0	0.789141	0	-0.789141	0.368163	0.921644	exon	ENST00000447832	ENSG00000226235	LEMD1-AS1	---	---	---	---	---
1:205616478|205623891	2.89947	1.83985	0.873449	4.03874	0	3.6505	1.87092	2.56308	0.692154	0.287411	0.921644	exon	ENST00000616704,ENST00000357992	ENSG00000158711	ELK4	hsa_circ_0000175	1	205616478	205623891	-
1:205618957|205620838	1.38702	2.62281	0	0	0	0	1.33661	0	-1.33661	0.200534	0.921644	exon	ENST00000616704,ENST00000357992	ENSG00000158711	ELK4	---	---	---	---	---
1:205661861|205664886	0	0	2.11375	0	0	0	0.704583	0	-0.704583	0.413185	0.921644	exon	ENST00000367145	ENSG00000158715	SLC45A3	---	---	---	---	---
1:205720501|205729621	0	0	0	1.09988	0	0	0	0.366626	0.366626	0.661625	0.921644	exon	ENST00000367142	ENSG00000069275	NUCKS1	---	---	---	---	---
1:205723926|205729621	1.38702	0	0	0	0	1.28966	0.46234	0.429887	-0.0324521	0.980058	0.991303	exon	ENST00000367142	ENSG00000069275	NUCKS1	hsa_circ_0005169	1	205723926	205729621	-
1:206205429|206206037	0	0	1.41363	0	0	0	0.471212	0	-0.471212	0.566201	0.921644	exon	ENST00000579225,ENST00000624686	ENSG00000266028	SRGAP2	---	---	---	---	---
1:206303281|206343008	0	1.83985	0	0	0	0	0.613285	0	-0.613285	0.494453	0.921644	exon	ENST00000605610,ENST00000573034,ENST00000624873,ENST00000605242	ENSG00000266028	SRGAP2	---	---	---	---	---
1:206342846|206393673	0	0	2.11375	0	0	0	0.704583	0	-0.704583	0.413185	0.921644	exon	ENST00000605610,ENST00000573034,ENST00000624873	ENSG00000266028	SRGAP2	---	---	---	---	---
1:20637842|20639992	1.38702	0	3.34375	1.44098	0	0	1.57692	0.480325	-1.0966	0.269979	0.921644	exon	ENST00000321556	ENSG00000158828	PINK1	---	---	---	---	---
1:20637842|20645723	0	1.83985	0	0	0	0	0.613285	0	-0.613285	0.494453	0.921644	exon	ENST00000321556	ENSG00000158828	PINK1	---	---	---	---	---
1:206384014|206393673	2.89947	0	1.41363	1.44098	0	0	1.4377	0.480325	-0.957375	0.414148	0.921644	exon	ENST00000605610,ENST00000573034,ENST00000419187,ENST00000624873	ENSG00000266028	SRGAP2	---	---	---	---	---
1:206392689|206393673	0	2.62281	1.80575	2.61944	0	0	1.47619	0.873148	-0.603038	0.860921	0.950686	exon	ENST00000605610,ENST00000573034,ENST00000419187,ENST00000624873	ENSG00000266028	SRGAP2	hsa_circ_0008182	1	206392689	206393673	+
1:206392689|206406574	0	0	0	0	2.03388	0	0	0.677962	0.677962	0.50093	0.921644	exon	ENST00000605610,ENST00000573034,ENST00000419187,ENST00000624873	ENSG00000266028	SRGAP2	---	---	---	---	---
1:206392689|206415973	0	0	0	1.94801	0	0	0	0.649335	0.649335	0.47295	0.921644	exon	ENST00000605610,ENST00000573034,ENST00000624873	ENSG00000266028	SRGAP2	---	---	---	---	---
1:206392689|206430222	0	0	0	0.652309	0	0	0	0.217436	0.217436	0.781429	0.921644	exon	ENST00000605610,ENST00000573034,ENST00000624873	ENSG00000266028	SRGAP2	---	---	---	---	---
1:206415889|206430222	0	0	1.41363	0	0	0	0.471212	0	-0.471212	0.566201	0.921644	exon	ENST00000605610,ENST00000573034,ENST00000624873,ENST00000605476	ENSG00000266028	SRGAP2	---	---	---	---	---
1:206593619|206595838	0	1.83985	0	0	0	0	0.613285	0	-0.613285	0.494453	0.921644	exon	ENST00000271764,ENST00000367114	ENSG00000143486	EIF2D	hsa_circ_0016248	1	206593619	206595838	-
1:206597100|206600308	0	2.62281	1.41363	1.94801	2.03388	1.28966	1.34548	1.75718	0.411704	0.935393	0.980408	exon	ENST00000613435,ENST00000484492,ENST00000271764,ENST00000617960,ENST00000367114	ENSG00000143486	EIF2D	---	---	---	---	---
1:206599003|206608326	0	0	0	1.94801	0	0	0	0.649335	0.649335	0.47295	0.921644	exon	ENST00000613435,ENST00000271764,ENST00000367114	ENSG00000143486	EIF2D	---	---	---	---	---
1:206599866|206600262	0	0	0	0.652309	0	0	0	0.217436	0.217436	0.781429	0.921644	intron	ENST00000613435,ENST00000484492,ENST00000271764,ENST00000617960,ENST00000367114	ENSG00000143486	EIF2D	---	---	---	---	---
1:207054701|207063829	0	0	0	1.09988	0	0	0	0.366626	0.366626	0.661625	0.921644	exon	ENST00000411990,ENST00000367080,ENST00000367079	ENSG00000123836	PFKFB2	hsa_circ_0016280	1	207054701	207063829	+
1:207061953|207065160	0	0	1.80575	0	2.03388	1.28966	0.601917	1.10785	0.505932	0.84123	0.941209	exon	ENST00000411990,ENST00000367080,ENST00000367079	ENSG00000123836	PFKFB2	---	---	---	---	---
1:207061953|207068309	0	0	1.80575	0	0	0	0.601917	0	-0.601917	0.475406	0.921644	exon	ENST00000411990,ENST00000367080,ENST00000367079	ENSG00000123836	PFKFB2	hsa_circ_0016282	1	207061953	207068309	+
1:207061953|207071573	0	0	0.873449	1.09988	0	0	0.29115	0.366626	0.0754759	0.929396	0.977053	exon	ENST00000411990,ENST00000367080,ENST00000367079	ENSG00000123836	PFKFB2	---	---	---	---	---
1:207124170|207134780	1.38702	2.62281	2.11375	3.87974	0	1.28966	2.04119	1.72313	-0.318058	0.597013	0.921644	exon_intron	ENST00000619568	ENSG00000275392	RP11-164O23.8	---	---	---	---	---
1:247156406|247159813	8.80363	7.23482	4.95202	7.34683	6.59912	6.47779	6.99682	6.80792	-0.188906	0.374087	0.921644	exon	ENST00000340684	ENSG00000196418	ZNF124	---	---	---	---	---
1:207124170|207203946	0	0	0	0	2.03388	0	0	0.677962	0.677962	0.50093	0.921644	exon_intron	ENST00000619568,ENST00000423510	ENSG00000275392,ENSG00000226565	RP11-164O23.8,RP11-164O23.5	---	---	---	---	---
1:207130171|207134780	1.38702	0	0	0	0	0	0.46234	0	-0.46234	0.58606	0.921644	intergenic region	n/a	n/a	---	---	---	---	---	---
8:102360071|102361626	6.3817	7.44164	7.15427	6.57482	7.13214	7.12611	6.99254	6.94436	-0.048182	0.64189	0.921644	exon	ENST00000521922,ENST00000220959,ENST00000520539	ENSG00000104517	UBR5	hsa_circ_0001819	8	102360071	102361626	-
1:207130171|207156421	2.54748	0	0	0.652309	0	0	0.849161	0.217436	-0.631724	0.496237	0.921644	exon_intron	ENST00000423510	ENSG00000226565	RP11-164O23.5	---	---	---	---	---
1:207130171|207203946	0	1.83985	2.11375	1.44098	0	0	1.31787	0.480325	-0.837543	0.570766	0.921644	exon_intron	ENST00000423510	ENSG00000226565	RP11-164O23.5	---	---	---	---	---
1:207134694|207155058	0	0	0	0.652309	0	0	0	0.217436	0.217436	0.781429	0.921644	exon_intron	ENST00000423510	ENSG00000226565	RP11-164O23.5	---	---	---	---	---
1:207134694|207156421	0	0	1.41363	0	0	0	0.471212	0	-0.471212	0.566201	0.921644	exon_intron	ENST00000423510	ENSG00000226565	RP11-164O23.5	---	---	---	---	---
1:207134694|207203946	0	0	1.41363	1.09988	0	0	0.471212	0.366626	-0.104586	0.926801	0.977053	exon_intron	ENST00000423510	ENSG00000226565	RP11-164O23.5	---	---	---	---	---
1:207322382|207326837	0	0	0	1.09988	0	0	0	0.366626	0.366626	0.661625	0.921644	exon	ENST00000343420,ENST00000367064,ENST00000367067,ENST00000391921,ENST00000314754,ENST00000488171,ENST00000367063	ENSG00000196352	CD55	hsa_circ_0016291	1	207322382	207326837	+
1:207325622|207340508	0	0	0	0	0	1.95955	0	0.653185	0.653185	0.485036	0.921644	exon	ENST00000314754,ENST00000367063	ENSG00000196352	CD55	---	---	---	---	---
1:20744355|20744743	0	0	1.80575	0	0	0	0.601917	0	-0.601917	0.475406	0.921644	exon	ENST00000375003,ENST00000312239	ENSG00000127483	HP1BP3	---	---	---	---	---
1:20745543|20773610	0	0	0	1.44098	0	0	0	0.480325	0.480325	0.5841	0.921644	exon	ENST00000375003,ENST00000312239	ENSG00000127483	HP1BP3	---	---	---	---	---
1:20747544|20773610	0	0	0	1.71665	2.03388	0	0	1.25018	1.25018	0.302852	0.921644	exon	ENST00000375003,ENST00000312239	ENSG00000127483	HP1BP3	hsa_circ_0010439	1	20747544	20773610	-
1:20747544|20776750	0	0	1.41363	1.44098	0	0	0.471212	0.480325	0.0091139	0.984003	0.99243	exon	ENST00000312239	ENSG00000127483	HP1BP3	---	---	---	---	---
1:20749723|20765531	0	1.83985	0	0	0	0	0.613285	0	-0.613285	0.494453	0.921644	exon	ENST00000419948,ENST00000375003,ENST00000312239	ENSG00000127483	HP1BP3	---	---	---	---	---
10:103622470|103661114	6.85414	6.93366	7.17103	7.47289	7.19444	7.38493	6.98628	7.35075	0.364474	0.184594	0.921644	exon	ENST00000369774	ENSG00000107957	SH3PXD2A	hsa_circ_0005620	10	103622470	103661114	-
1:20757166|20767664	1.38702	0	0	0	0	0	0.46234	0	-0.46234	0.58606	0.921644	exon	ENST00000375003,ENST00000312239,ENST00000438032	ENSG00000127483	HP1BP3	---	---	---	---	---
1:20757166|20771073	0	0	1.41363	0	0	0	0.471212	0	-0.471212	0.566201	0.921644	exon	ENST00000419948,ENST00000375003,ENST00000312239,ENST00000438032	ENSG00000127483	HP1BP3	hsa_circ_0005553	1	20757166	20771073	-
10:126970702|127000307	7.25593	7.23482	6.46539	7.0805	6.77251	6.77285	6.98538	6.87529	-0.110091	0.584085	0.921644	exon	ENST00000280333,ENST00000623213	ENSG00000150760	DOCK1	hsa_circ_0002669	10	126970702	127000307	+
7:122113118|122133741	7.22511	7.05057	6.6796	6.9195	6.17366	6.67426	6.98509	6.58914	-0.395958	0.197501	0.921644	exon	ENST00000393376,ENST00000417368,ENST00000358954,ENST00000431170	ENSG00000008311	AASS	hsa_circ_0006919	7	122113118	122133741	-
1:20757166|20779911	2.08091	0	1.80575	0.652309	0	1.28966	1.29556	0.647324	-0.648232	0.557401	0.921644	exon	ENST00000312239,ENST00000438032	ENSG00000127483	HP1BP3	hsa_circ_0010444	1	20757166	20779911	-
3:107710452|107716849	6.74973	7.65978	6.54467	6.93979	6.64446	6.40587	6.98473	6.66338	-0.321352	0.288272	0.921644	exon	ENST00000406780,ENST00000449213,ENST00000402543,ENST00000456419,ENST00000416476,ENST00000402163,ENST00000325805,ENST00000429270,ENST00000415149,ENST00000449335,ENST00000427402,ENST00000413213	ENSG00000114439	BBX	hsa_circ_0001324	3	107710452	107716849	+
16:4332215|4333519	6.9515	6.24436	7.72455	7.62687	7.95771	7.11111	6.97347	7.56523	0.591756	0.351504	0.921644	exon	ENST00000262366	ENSG00000126603	GLIS2	hsa_circ_0005692	16	4332215	4333519	+
1:20765377|20776750	3.62148	0	0.873449	1.94801	3.74203	2.76104	1.49831	2.81703	1.31871	0.642515	0.921644	exon	ENST00000424732,ENST00000312239,ENST00000438032	ENSG00000127483	HP1BP3	---	---	---	---	---
1:20765377|20780540	0	0	0	0.652309	0	0	0	0.217436	0.217436	0.781429	0.921644	exon	ENST00000312239,ENST00000438032	ENSG00000127483	HP1BP3	hsa_circ_0010445	1	20765377	20780540	-
1:20767584|20773610	0	0	0	0	0	1.28966	0	0.429887	0.429887	0.635324	0.921644	exon	ENST00000424732,ENST00000375003,ENST00000312239,ENST00000438032	ENSG00000127483	HP1BP3	---	---	---	---	---
1:20767584|20776750	0	1.83985	0	0	0	0	0.613285	0	-0.613285	0.494453	0.921644	exon	ENST00000424732,ENST00000312239,ENST00000438032	ENSG00000127483	HP1BP3	---	---	---	---	---
2:147972739|147982081	6.89388	7.15872	6.7257	6.59202	6.40202	6.77285	6.9261	6.58896	-0.337134	0.187528	0.921644	exon	ENST00000535373,ENST00000457954	ENSG00000115947	ORC4	hsa_circ_0004491	2	147972739	147982081	-
1:20770930|20776750	2.08091	0	0	1.71665	2.03388	0	0.693638	1.25018	0.556541	0.807778	0.93419	exon	ENST00000424732,ENST00000312239,ENST00000438032	ENSG00000127483	HP1BP3	---	---	---	---	---
1:20770930|20780540	0	0	0	1.09988	0	0	0	0.366626	0.366626	0.661625	0.921644	exon	ENST00000312239,ENST00000438032	ENSG00000127483	HP1BP3	---	---	---	---	---
1:207757014|207759724	0	3.79688	2.36742	1.71665	0	3.8076	2.05477	1.84142	-0.21335	0.947305	0.983054	exon	ENST00000354848,ENST00000357714,ENST00000322875,ENST00000322918,ENST00000360212,ENST00000469535,ENST00000367041,ENST00000367042,ENST00000358170,ENST00000493796,ENST00000480003	ENSG00000117335	CD46	---	---	---	---	---
1:207757014|207761446	0	0	0	0	2.03388	0	0	0.677962	0.677962	0.50093	0.921644	exon	ENST00000354848,ENST00000357714,ENST00000322875,ENST00000322918,ENST00000360212,ENST00000469535,ENST00000367041,ENST00000367042,ENST00000358170,ENST00000480003	ENSG00000117335	CD46	hsa_circ_0016302	1	207757014	207761446	+
1:207757014|207767195	2.08091	3.50067	2.58309	2.61944	0	1.28966	2.72156	1.30304	-1.41852	0.314515	0.921644	exon	ENST00000354848,ENST00000357714,ENST00000322875,ENST00000322918,ENST00000360212,ENST00000469535,ENST00000367041,ENST00000367042,ENST00000358170,ENST00000480003	ENSG00000117335	CD46	---	---	---	---	---
1:207757014|207770362	0	1.83985	0	0	0	0	0.613285	0	-0.613285	0.494453	0.921644	exon	ENST00000354848,ENST00000357714,ENST00000322875,ENST00000322918,ENST00000469535,ENST00000367041,ENST00000367042,ENST00000358170	ENSG00000117335	CD46	---	---	---	---	---
1:20775724|20776005	0	0	0	0	0	1.95955	0	0.653185	0.653185	0.485036	0.921644	exon	ENST00000487117,ENST00000375000	ENSG00000127483	HP1BP3	---	---	---	---	---
[truncated: 46,262 more rows]
