# Supplementary material for: Identification and characterization of human ovary-derived circular RNAs and their potential roles in ovarian aging
Source: Aging (Albany NY). 2018 Sep 23;10(9):2511–34. doi: 10.18632/aging.101565 (PMC6188495; doi:10.18632/aging.101565)
Supplement: Supplementary Table S2 [file aging-10-101565-s003.xlsx]

## Sheet: 工作表1
Transcript ID	N25	N26	N28	N46	N45	N44	G1	G2	G2 vs G1 (log2 Fold Change)	G2 vs G1 P value	G2 vs G1 FDR	circRNA type	Transcript ID	Gene ID	Symbol	cirbase ID	cirbase chr	cirbase Start	cirbase End	cirbase strand
1:100913663|100921841	0	0	0.873449	2.61944	3.3625	2.41525	0.29115	2.79906	2.50791	0.0238109	0.921644	exon	ENST00000357650,ENST00000370112	ENSG00000162695	SLC30A7	hsa_circ_0013353	1	100913663	100921841	+
1:117460489|117502970	2.54748	2.62281	2.36742	3.07585	5.13116	3.03976	2.51257	3.74893	1.23635	0.0443052	0.921644	exon	ENST00000449370,ENST00000356554	ENSG00000198162	MAN1A2	hsa_circ_0002059	1	117460489	117502970	+
1:146617029|146650451	0	0	0.873449	2.61944	2.03388	3.03976	0.29115	2.56436	2.27321	0.045823	0.921644	exon	ENST00000614586	ENSG00000276975	HYDIN2	---	---	---	---	---
1:155370504|155370983	4.23029	5.11005	3.6609	4.67708	5.65881	5.87746	4.33375	5.40445	1.0707	0.0326749	0.921644	exon	ENST00000368346,ENST00000392403	ENSG00000116539	ASH1L	hsa_circ_0007608	1	155370504	155370983	-
1:168104477|168104894	1.38702	2.62281	1.41363	4.39293	3.74203	4.50275	1.80782	4.21257	2.40475	0.000492298	0.921644	exon	ENST00000367835,ENST00000367838,ENST00000493800,ENST00000271357,ENST00000537209	ENSG00000143147	GPR161	hsa_circ_0015136	1	168104477	168104894	-
1:168231514|168236770	0	0	0	2.32244	4.04223	1.28966	0	2.55145	2.55145	0.00336616	0.921644	exon	ENST00000471981,ENST00000630869,ENST00000367829,ENST00000271375	ENSG00000213064	SFT2D2	---	---	---	---	---
1:182874854|182880608	2.54748	1.83985	2.58309	0	0	0	2.32348	0	-2.32348	0.0193318	0.921644	exon	ENST00000367549	ENSG00000135829	DHX9	hsa_circ_0015571	1	182874854	182880608	+
1:202750659|202758510	0	0	0	0.652309	3.3625	1.95955	0	1.99145	1.99145	0.037626	0.921644	exon	ENST00000235790,ENST00000367265,ENST00000367264	ENSG00000117139	KDM5B	hsa_circ_0016031	1	202750659	202758510	-
1:20749723|20773610	5.84645	5.21398	5.52137	4.46938	4.2906	4.67582	5.52727	4.4786	-1.04867	0.00632891	0.921644	exon	ENST00000419948,ENST00000375003,ENST00000312239	ENSG00000127483	HP1BP3	hsa_circ_0000023	1	20749723	20773610	-
1:213071006|213117410	4.10045	4.87662	2.58309	2.14734	2.84602	1.28966	3.85339	2.09434	-1.75905	0.00801636	0.921644	exon	ENST00000614059,ENST00000543354,ENST00000615329,ENST00000366960,ENST00000543470	ENSG00000136643	RPS6KC1	---	---	---	---	---
1:227004994|227017050	4.74664	4.99805	4.20733	3.49701	3.74203	3.27325	4.65067	3.5041	-1.14657	0.0190424	0.921644	exon	ENST00000366766,ENST00000334218,ENST00000448940,ENST00000366764,ENST00000366769,ENST00000429440,ENST00000442054,ENST00000366767	ENSG00000143776	CDC42BPA	hsa_circ_0016733	1	227004994	227017050	-
1:229460611|229465519	3.1822	1.83985	3.08548	3.70103	4.04223	4.67582	2.70251	4.13969	1.43718	0.0452514	0.921644	exon	ENST00000261396	ENSG00000069248	NUP133	---	---	---	---	---
1:231537213|231542611	2.54748	3.1275	1.80575	0	0	0	2.49358	0	-2.49358	0.00817753	0.921644	exon	ENST00000413309,ENST00000602962,ENST00000602634,ENST00000475168,ENST00000602567,ENST00000366639,ENST00000476913,ENST00000602956,ENST00000602825	ENSG00000116918,ENSG00000270106	TSNAX,TSNAX-DISC1	hsa_circ_0004834	1	231537213	231542611	+
1:232460887|232483966	0	0	0	1.94801	4.2906	2.41525	0	2.88462	2.88462	0.000816181	0.921644	exon	ENST00000262861,ENST00000366630	ENSG00000116991	SIPA1L2	---	---	---	---	---
1:235419473|235430804	2.89947	1.83985	1.41363	0	0	0	2.05099	0	-2.05099	0.0403136	0.921644	exon	ENST00000543662,ENST00000461651,ENST00000472011,ENST00000482230,ENST00000406207,ENST00000366601	ENSG00000116957	TBCE	hsa_circ_0007247	1	235419473	235430804	+
1:235793503|235801097	2.08091	3.1275	1.80575	3.42204	4.2906	4.59188	2.33806	4.10151	1.76345	0.00972594	0.921644	exon	ENST00000489585,ENST00000389793,ENST00000389794,ENST00000465349	ENSG00000143669	LYST	hsa_circ_0004550	1	235793503	235801097	-
1:236024070|236038253	1.38702	2.62281	2.93665	4.67708	3.74203	4.30606	2.31549	4.24172	1.92623	0.00645292	0.921644	exon	ENST00000264187,ENST00000366595	ENSG00000116962	NID1	hsa_circ_0017105	1	236024070	236038253	-
1:236850344|236853088	3.62148	3.50067	0.873449	0	0	0	2.6652	0	-2.6652	0.00118194	0.921644	exon	ENST00000366577,ENST00000463959,ENST00000366576,ENST00000535889	ENSG00000116984	MTR	hsa_circ_0017160	1	236850344	236853088	+
1:243316755|243344331	2.54748	2.62281	1.80575	0	0	0	2.32535	0	-2.32535	0.0195405	0.921644	exon	ENST00000366541,ENST00000435549	ENSG00000054282	SDCCAG8	---	---	---	---	---
1:25448808|25456831	2.89947	4.25234	4.33177	2.61944	0	3.03976	3.82786	1.8864	-1.94146	0.0444549	0.921644	exon	ENST00000374343	ENSG00000204178	TMEM57	hsa_circ_0010937	1	25448808	25456831	+
1:30992390|31007102	5.88639	5.64429	4.95202	4.91436	4.2906	4.07825	5.49424	4.42774	-1.0665	0.0165674	0.921644	exon	ENST00000373747,ENST00000426105,ENST00000525843,ENST00000373741,ENST00000257075,ENST00000440538	ENSG00000134644	PUM1	hsa_circ_0000044	1	30992390	31007102	-
1:32633645|32634792	0	0	0	3.25931	2.84602	1.28966	0	2.465	2.465	0.00912892	0.921644	exon	ENST00000468695,ENST00000476493,ENST00000483138,ENST00000436661,ENST00000473294,ENST00000373501	ENSG00000176261	ZBTB8OS	hsa_circ_0007516	1	32633645	32634792	-
1:38998171|39001106	0	0	2.11375	3.49701	3.3625	3.47417	0.704583	3.44456	2.73997	0.0210329	0.921644	exon	ENST00000531822,ENST00000432648	ENSG00000174574	AKIRIN1	hsa_circ_0003529	1	38998171	39001106	+
1:43920404|43920928	3.1822	3.1275	4.33177	2.14734	2.84602	1.28966	3.54716	2.09434	-1.45282	0.038827	0.921644	exon	ENST00000372368,ENST00000332628,ENST00000262915,ENST00000361400,ENST00000361392,ENST00000490541,ENST00000347631,ENST00000469715,ENST00000490502,ENST00000372374,ENST00000495482,ENST00000361746,ENST00000351035,ENST00000372372,ENST00000530581,ENST00000533212	ENSG00000126091	ST3GAL3	hsa_circ_0006595	1	43920404	43920928	+
1:50567077|50596216	3.95777	3.50067	4.95202	2.61944	2.03388	3.47417	4.13682	2.70917	-1.42765	0.0250032	0.921644	exon	ENST00000472808,ENST00000494400,ENST00000396153	ENSG00000185104	FAF1	hsa_circ_0008197	1	50567077	50596216	-
1:54036610|54043525	2.08091	3.1275	1.41363	4.22667	4.04223	2.76104	2.20735	3.67665	1.4693	0.0491087	0.921644	exon	ENST00000371341,ENST00000440019,ENST00000371348,ENST00000234831,ENST00000420738,ENST00000452421,ENST00000371344	ENSG00000116209	TMEM59	---	---	---	---	---
1:6231902|6233643	0	0	1.80575	2.74778	3.3625	3.27325	0.601917	3.12784	2.52593	0.0379625	0.921644	exon	ENST00000343813,ENST00000489498	ENSG00000116237	ICMT	hsa_circ_0007427	1	6231902	6233643	-
1:64602806|64634260	0	1.83985	0	2.61944	4.99777	3.27325	0.613285	3.63016	3.01687	0.00768109	0.921644	exon	ENST00000290039,ENST00000470527,ENST00000495994	ENSG00000158966	CACHD1	---	---	---	---	---
1:64629355|64634260	3.4185	4.25234	2.11375	1.94801	0	0	3.26153	0.649335	-2.61219	0.0165718	0.921644	exon	ENST00000290039,ENST00000470527,ENST00000495994	ENSG00000158966	CACHD1	hsa_circ_0012845	1	64629355	64634260	+
1:64671564|64675983	0	0	0.873449	2.32244	3.3625	1.95955	0.29115	2.54816	2.25701	0.0461785	0.921644	exon	ENST00000290039,ENST00000470527,ENST00000495994	ENSG00000158966	CACHD1	---	---	---	---	---
1:65913245|65918835	2.89947	2.62281	3.22039	4.50614	4.2906	4.07825	2.91422	4.29166	1.37744	0.0264974	0.921644	exon	ENST00000329654,ENST00000341517	ENSG00000184588	PDE4B	hsa_circ_0008433	1	65913245	65918835	+
1:70292388|70306290	5.37102	5.11005	4.20733	4.08806	3.3625	3.8076	4.89613	3.75272	-1.14341	0.0226161	0.921644	exon	ENST00000490846,ENST00000370944,ENST00000262346	ENSG00000118454	ANKRD13C	hsa_circ_0002231	1	70292388	70306290	-
1:74249459|74336149	0	0	0	2.14734	2.84602	2.76104	0	2.5848	2.5848	0.0105424	0.921644	exon	ENST00000326637,ENST00000370899,ENST00000557284,ENST00000370895	ENSG00000116783,ENSG00000259030	TNNI3K,FPGT-TNNI3K	---	---	---	---	---
1:84179177|84185182	2.54748	3.79688	3.56273	1.09988	0	1.95955	3.30236	1.01981	-2.28255	0.0153977	0.921644	exon	ENST00000610703,ENST00000417530,ENST00000432111,ENST00000370684,ENST00000394838,ENST00000370680,ENST00000370689,ENST00000450730,ENST00000446538,ENST00000413538,ENST00000436133,ENST00000370688,ENST00000470673,ENST00000370685,ENST00000394839,ENST00000370682,ENST00000614872	ENSG00000142875	PRKACB	---	---	---	---	---
10:110589605|110593223	2.89947	1.83985	3.34375	1.09988	0	0	2.69436	0.366626	-2.32773	0.0324535	0.921644	exon	ENST00000361804	ENSG00000108055	SMC3	---	---	---	---	---
10:11249153|11270824	0	0	0.873449	3.56827	0	2.76104	0.29115	2.10977	1.81862	0.0476837	0.921644	exon	ENST00000632065,ENST00000354897,ENST00000636488,ENST00000608830,ENST00000633200,ENST00000542579,ENST00000416382,ENST00000637215,ENST00000399850,ENST00000631816,ENST00000638035,ENST00000631460,ENST00000632728,ENST00000609870,ENST00000417956,ENST00000633077,ENST00000609692	ENSG00000048740	CELF2	---	---	---	---	---
10:119838535|119842595	0	0	0	1.09988	3.3625	2.41525	0	2.29254	2.29254	0.0177789	0.921644	exon	ENST00000360003,ENST00000466047,ENST00000369077	ENSG00000197771	MCMBP	hsa_circ_0020190	10	119838535	119842595	-
10:124681607|124706887	3.7994	3.50067	3.45739	4.39293	4.85078	4.67582	3.58582	4.63984	1.05402	0.0466415	0.921644	exon	ENST00000494792,ENST00000392754,ENST00000280780,ENST00000337318	ENSG00000258539,ENSG00000189319	RP11-12J10.3,FAM53B	hsa_circ_0002282	10	124681607	124706887	-
10:26759062|26770345	3.1822	1.83985	0.873449	0	0	0	1.96517	0	-1.96517	0.033842	0.921644	exon	ENST00000346832,ENST00000376142,ENST00000376170,ENST00000376140,ENST00000376139,ENST00000376160,ENST00000359188,ENST00000376166,ENST00000376138	ENSG00000136754	ABI1	---	---	---	---	---
10:27142387|27145590	3.1822	2.62281	2.58309	0	0	0	2.79603	0	-2.79603	0.00232103	0.921644	exon	ENST00000375972,ENST00000376016,ENST00000326799,ENST00000396296	ENSG00000136758	YME1L1	hsa_circ_0005633	10	27142387	27145590	-
10:46932377|46947955	2.08091	4.04251	4.33177	2.74778	0	1.28966	3.48506	1.34581	-2.13925	0.0348173	0.921644	exon_intron	ENST00000513159,ENST00000374339,ENST00000395722,ENST00000374342,ENST00000509599,ENST00000513756,ENST00000506080,ENST00000395725,ENST00000508715,ENST00000374218,ENST00000466912,ENST00000509774,ENST00000374346,ENST00000437863,ENST00000510335,ENST00000502254,ENST00000503851,ENST00000513156,ENST00000509900,ENST00000506881,ENST00000505814,ENST00000417004,ENST00000508602,ENST00000511769,ENST00000395721…	ENSG00000204179	PTPN20	---	---	---	---	---
10:49474027|49500696	2.54748	2.62281	0.873449	0	0	0	2.01458	0	-2.01458	0.0412083	0.921644	exon	ENST00000623115,ENST00000355832,ENST00000623073	ENSG00000225830	ERCC6	---	---	---	---	---
10:49952126|49958480	3.62148	4.99805	3.45739	2.61944	2.03388	3.03976	4.02564	2.56436	-1.46128	0.0229124	0.921644	exon	ENST00000483296,ENST00000374098,ENST00000451577,ENST00000478381	ENSG00000204152	TIMM23B	hsa_circ_0006820	10	49952126	49958480	+
10:52280789|52290290	3.1822	1.83985	1.80575	0	0	0	2.27593	0	-2.27593	0.0163572	0.921644	exon	ENST00000401604,ENST00000373985,ENST00000373975,ENST00000373980	ENSG00000185532	PRKG1	hsa_circ_0003030	10	52280789	52290290	+
10:5773842|5800705	4.10045	4.87662	4.27089	3.49701	2.03388	2.76104	4.41599	2.76398	-1.65201	0.0152288	0.921644	exon	ENST00000456041,ENST00000380191,ENST00000380181	ENSG00000057608	GDI2	hsa_circ_0017586	10	5773842	5800705	-
10:68393138|68396881	2.54748	3.50067	2.77067	0.652309	0	0	2.93961	0.217436	-2.72217	0.00661619	0.921644	exon	ENST00000472394,ENST00000454950,ENST00000388768,ENST00000466493,ENST00000602465	ENSG00000204130	RUFY2	---	---	---	---	---
10:7367649|7381949	4.83094	3.79688	3.75281	3.17049	2.84602	3.03976	4.12687	3.01876	-1.10812	0.0494343	0.921644	exon	ENST00000361972,ENST00000379711,ENST00000397167,ENST00000379713	ENSG00000198879	SFMBT2	hsa_circ_0017648	10	7367649	7381949	-
10:84417771|84477664	0	0	0	2.61944	4.04223	2.41525	0	3.02564	3.02564	0.000704091	0.921644	exon	ENST00000372088,ENST00000224756,ENST00000494144	ENSG00000107771	CCSER2	hsa_circ_0018996	10	84417771	84477664	+
10:92081320|92091944	4.10045	2.62281	1.80575	1.09988	0	0	2.843	0.366626	-2.47638	0.0118315	0.921644	exon	ENST00000412050,ENST00000614585,ENST00000265997	ENSG00000107864	CPEB3	hsa_circ_0004224	10	92081320	92091944	-
11:103943452|104000255	0	0	0	2.14734	3.3625	1.28966	0	2.2665	2.2665	0.0204524	0.921644	exon	ENST00000393158	ENSG00000170962	PDGFD	---	---	---	---	---
11:108673467|108679560	3.7994	3.50067	2.58309	0.652309	0	1.95955	3.29439	0.870621	-2.42377	0.0120126	0.921644	exon	ENST00000322536,ENST00000526794	ENSG00000178105	DDX10	hsa_circ_0024242	11	108673467	108679560	+
11:108688936|108706837	2.89947	2.62281	2.58309	0	0	1.28966	2.70179	0.429887	-2.2719	0.0389696	0.921644	exon	ENST00000322536,ENST00000526794	ENSG00000178105	DDX10	hsa_circ_0024246	11	108688936	108706837	+
11:111836165|111838378	1.38702	0	0.873449	2.47857	3.74203	3.27325	0.753489	3.16462	2.41113	0.0144372	0.921644	exon	ENST00000398006,ENST00000619129,ENST00000616540,ENST00000614444,ENST00000622211,ENST00000531154	ENSG00000086848,ENSG00000258529	ALG9,RP11-108O10.8	---	---	---	---	---
11:111836165|111838399	2.08091	2.62281	2.36742	0	0	0	2.35705	0	-2.35705	0.0185435	0.921644	exon	ENST00000616540,ENST00000531154	ENSG00000086848	ALG9	---	---	---	---	---
11:112037273|112045230	0	0	0	3.56827	2.03388	1.28966	0	2.29727	2.29727	0.0117038	0.921644	exon	ENST00000280346,ENST00000531306,ENST00000533297	ENSG00000150768	DLAT	hsa_circ_0024297	11	112037273	112045230	+
11:117776791|117780810	1.38702	0	0	2.14734	3.74203	2.76104	0.46234	2.88347	2.42113	0.0222333	0.921644	exon	ENST00000321322	ENSG00000177103	DSCAML1	---	---	---	---	---
11:118489792|118493230	0	1.83985	0.873449	3.42204	2.84602	2.76104	0.904434	3.0097	2.10526	0.0348307	0.921644	exon	ENST00000534358,ENST00000389506	ENSG00000118058	KMT2A	hsa_circ_0024444	11	118489792	118493230	+
11:125602303|125604247	0	0	0.873449	1.94801	2.84602	3.27325	0.29115	2.68909	2.39794	0.0303446	0.921644	exon	ENST00000534472,ENST00000392708,ENST00000529196,ENST00000531491	ENSG00000134910	STT3A	hsa_circ_0024766	11	125602303	125604247	+
11:128758115|128768272	0	0	1.41363	2.14734	4.2906	2.76104	0.471212	3.06632	2.59511	0.0134231	0.921644	exon	ENST00000527767,ENST00000534087,ENST00000608055,ENST00000527786,ENST00000281428,ENST00000429175	ENSG00000151702	FLI1	hsa_circ_0000368	11	128758115	128768272	+
11:18564892|18578808	0	0	1.41363	2.14734	3.74203	2.41525	0.471212	2.76821	2.297	0.0486397	0.921644	exon	ENST00000396197,ENST00000300038,ENST00000320750,ENST00000379387,ENST00000396196,ENST00000543987,ENST00000535484,ENST00000541984	ENSG00000151116	UEVLD	---	---	---	---	---
11:230452|233534	2.89947	3.50067	2.58309	0	0	0	2.99441	0	-2.99441	0.00071853	0.921644	exon	ENST00000529382,ENST00000529055,ENST00000532837,ENST00000382743,ENST00000532956,ENST00000528702	ENSG00000142082	SIRT3	hsa_circ_0020611	11	230452	233534	-
11:238998|244761	1.38702	1.83985	2.93665	0	0	0	2.05451	0	-2.05451	0.0370163	0.921644	exon	ENST00000382671,ENST00000525665,ENST00000534590,ENST00000352303,ENST00000621534,ENST00000532097	ENSG00000185627	PSMD13	---	---	---	---	---
11:28211062|28228931	0	0	0.873449	0.652309	3.3625	3.03976	0.29115	2.35152	2.06037	0.0481809	0.921644	exon_intron	ENST00000634973,ENST00000451385,ENST00000303459,ENST00000634627,ENST00000407364,ENST00000406787	ENSG00000169519	METTL15	---	---	---	---	---
11:34931404|34960518	0	0	0.873449	3.07585	2.84602	1.95955	0.29115	2.62714	2.33599	0.0377376	0.921644	exon	ENST00000448838,ENST00000227868	ENSG00000110435	PDHX	hsa_circ_0021706	11	34931404	34960518	+
11:3691347|3695606	2.08091	4.04251	4.07114	2.61944	0	1.28966	3.39819	1.30304	-2.09515	0.0410196	0.921644	exon	ENST00000355260,ENST00000359171,ENST00000429801,ENST00000324932	ENSG00000110713	NUP98	hsa_circ_0006430	11	3691347	3695606	-
11:46889411|46890494	1.38702	2.62281	2.36742	0	0	0	2.12575	0	-2.12575	0.0360373	0.921644	exon	ENST00000378623	ENSG00000134569	LRP4	---	---	---	---	---
11:47358844|47375729	0	0	0	2.61944	2.84602	1.95955	0	2.47501	2.47501	0.0156568	0.921644	exon	ENST00000378538,ENST00000227163,ENST00000533968	ENSG00000066336	SPI1	hsa_circ_0000303	11	47358844	47375729	-
11:63895159|63895633	1.38702	3.1275	2.93665	0	0	0	2.48372	0	-2.48372	0.00624228	0.921644	exon	ENST00000543220,ENST00000402010,ENST00000508192,ENST00000502399,ENST00000377810,ENST00000540169,ENST00000350490,ENST00000513765,ENST00000361128,ENST00000509502	ENSG00000072518	MARK2	hsa_circ_0022614	11	63895159	63895633	+
11:66519617|66523882	2.08091	1.83985	2.36742	0	0	0	2.09606	0	-2.09606	0.0490863	0.921644	exon	ENST00000419755,ENST00000630659,ENST00000529955,ENST00000526760,ENST00000529766,ENST00000318312	ENSG00000256349,ENSG00000174483	CTD-3074O7.11,BBS1	hsa_circ_0022995	11	66519617	66523882	+
11:68505145|68537891	5.31357	5.21398	5.29549	4.27007	3.74203	4.40776	5.27435	4.13995	-1.1344	0.00950113	0.921644	exon	ENST00000265636,ENST00000529710	ENSG00000110075	PPP6R3	hsa_circ_0004449	11	68505145	68537891	+
11:68519501|68551186	3.62148	1.83985	2.58309	0.652309	0	0	2.68148	0.217436	-2.46404	0.0125601	0.921644	exon	ENST00000393800,ENST00000524845,ENST00000529907,ENST00000265636,ENST00000529710,ENST00000393801,ENST00000524904	ENSG00000110075	PPP6R3	---	---	---	---	---
11:72981278|72989097	1.38702	1.83985	3.08548	0	0	0	2.10412	0	-2.10412	0.0275258	0.921644	exon_intron	ENST00000543644,ENST00000409418,ENST00000311172,ENST00000458644,ENST00000409853,ENST00000409314,ENST00000422375	ENSG00000137478	FCHSD2	---	---	---	---	---
11:77624963|77625818	4.74664	4.04251	3.34375	2.86562	2.84602	2.41525	4.0443	2.70896	-1.33533	0.0249921	0.921644	exon	ENST00000528364,ENST00000525064,ENST00000527133,ENST00000525428	ENSG00000074201	CLNS1A	hsa_circ_0000343	11	77624963	77625818	-
11:86007542|86031611	6.23472	3.79688	2.36742	2.47857	0	0	4.13301	0.826191	-3.30682	0.0356176	0.921644	exon	ENST00000630913,ENST00000528398,ENST00000526033,ENST00000393346,ENST00000532317,ENST00000356360	ENSG00000073921	PICALM	hsa_circ_0023936	11	86007542	86031611	-
11:86556553|86559823	4.74664	3.79688	4.95202	2.74778	2.84602	4.19665	4.49851	3.26348	-1.23503	0.0412047	0.921644	exon	ENST00000323418,ENST00000393324,ENST00000530520,ENST00000524826,ENST00000543262,ENST00000526504	ENSG00000151376	ME3	hsa_circ_0023966	11	86556553	86559823	-
12:103979831|103980962	1.38702	0	0	2.32244	3.3625	2.76104	0.46234	2.81532	2.35298	0.0343179	0.921644	exon	ENST00000266775,ENST00000537100,ENST00000392872,ENST00000436021,ENST00000544861	ENSG00000139372	TDG	---	---	---	---	---
12:104120400|104123423	2.08091	1.83985	3.08548	3.34297	4.68709	4.07825	2.33542	4.0361	1.70069	0.0275988	0.921644	exon	ENST00000551727,ENST00000240055	ENSG00000120837	NFYB	---	---	---	---	---
12:109102839|109103611	2.54748	2.62281	0.873449	0	0	0	2.01458	0	-2.01458	0.0412083	0.921644	exon	ENST00000446767,ENST00000336865,ENST00000539287,ENST00000242576	ENSG00000076248	UNG	hsa_circ_0028098	12	109102839	109103611	+
12:128414732|128415620	2.89947	3.79688	2.58309	2.97456	5.13116	4.67582	3.09315	4.26052	1.16737	0.0484455	0.921644	exon	ENST00000435159	ENSG00000181234	TMEM132C	---	---	---	---	---
12:131000383|131014340	1.38702	1.83985	2.77067	3.63618	4.68709	4.83033	1.99918	4.38453	2.38535	0.00108555	0.921644	exon	ENST00000261654,ENST00000535015	ENSG00000111452	ADGRD1	hsa_circ_0029434	12	131000383	131014340	+
12:19462510|19473355	5.58032	6.29264	5.2646	4.70896	4.2906	5.0349	5.71252	4.67815	-1.03437	0.0105189	0.921644	exon	ENST00000538425,ENST00000398864,ENST00000360995,ENST00000266508,ENST00000541908	ENSG00000139154	AEBP2	hsa_circ_0006420	12	19462510	19473355	+
12:22490123|22506819	2.89947	4.04251	4.14084	2.14734	2.84602	0	3.69427	1.66445	-2.02982	0.0224106	0.921644	exon	ENST00000396028,ENST00000541310,ENST00000543855,ENST00000535555,ENST00000545552,ENST00000333957,ENST00000542676,ENST00000543797,ENST00000536386,ENST00000446597	ENSG00000111731	C2CD5	hsa_circ_0008769	12	22490123	22506819	-
12:31451940|31495919	4.23029	4.74402	2.93665	1.44098	2.03388	1.95955	3.97032	1.81147	-2.15885	0.00102802	0.921644	exon	ENST00000536562,ENST00000389082,ENST00000354285	ENSG00000170456	DENND5B	hsa_circ_0025830	12	31451940	31495919	-
12:31701863|31709425	0	0	1.41363	1.09988	4.50242	3.27325	0.471212	2.95852	2.48731	0.0266269	0.921644	exon	ENST00000537960,ENST00000537562,ENST00000281471,ENST00000535408,ENST00000536761	ENSG00000151743	AMN1	---	---	---	---	---
12:3821873|3863957	2.08091	2.62281	0.873449	4.08806	3.74203	3.47417	1.85906	3.76809	1.90903	0.0150697	0.921644	exon	ENST00000427057	ENSG00000111224	PARP11	---	---	---	---	---
12:41014228|41029219	1.38702	1.83985	3.56273	0	0	0	2.2632	0	-2.2632	0.00932676	0.921644	exon	ENST00000551295,ENST00000347616,ENST00000348761	ENSG00000018236	CNTN1	---	---	---	---	---
12:46229153|46254936	1.38702	0	0	3.42204	3.3625	2.41525	0.46234	3.0666	2.60426	0.0121136	0.921644	exon	ENST00000439706	ENSG00000111371	SLC38A1	hsa_circ_0000397	12	46229153	46254936	-
12:50814010|50814439	2.54748	3.1275	3.22039	4.13576	4.2906	4.40776	2.96512	4.27804	1.31291	0.0341503	0.921644	exon	ENST00000551831,ENST00000262053	ENSG00000123268	ATF1	hsa_circ_0026285	12	50814010	50814439	+
12:53719739|53722183	2.08091	2.62281	2.77067	4.39293	3.3625	3.94926	2.49147	3.90156	1.4101	0.033509	0.921644	exon	ENST00000262059,ENST00000548263,ENST00000550804,ENST00000430117,ENST00000549935	ENSG00000012822	CALCOCO1	---	---	---	---	---
12:56664776|56673065	0	0	0	2.14734	2.84602	2.41525	0	2.46953	2.46953	0.017249	0.921644	exon	ENST00000414274,ENST00000436399,ENST00000537473,ENST00000614328,ENST00000456859,ENST00000448157,ENST00000262033	ENSG00000110958	PTGES3	hsa_circ_0027088	12	56664776	56673065	-
12:56671749|56673065	4.45943	4.25234	1.41363	1.09988	0	2.41525	3.37513	1.17171	-2.20342	0.033986	0.921644	exon	ENST00000414274,ENST00000537473,ENST00000614328,ENST00000456859,ENST00000448157,ENST00000262033	ENSG00000110958	PTGES3	hsa_circ_0008137	12	56671749	56673065	-
12:62667178|62720289	2.08091	1.83985	2.58309	0	0	0	2.16795	0	-2.16795	0.0357459	0.921644	exon	ENST00000551214,ENST00000228705	ENSG00000111110	PPM1H	---	---	---	---	---
12:91151654|91158509	2.08091	3.1275	2.36742	0	0	0	2.52528	0	-2.52528	0.00769688	0.921644	exon	ENST00000052754,ENST00000552962,ENST00000393155	ENSG00000011465	DCN	---	---	---	---	---
12:97185076|97186784	0	0	0	0.652309	2.84602	2.76104	0	2.08645	2.08645	0.0355395	0.921644	exon_intron	ENST00000552238	ENSG00000258131	RP11-541G9.1	---	---	---	---	---
12:98773042|98801125	0	0	0.873449	2.14734	3.3625	3.47417	0.29115	2.99467	2.70352	0.00997961	0.921644	exon	ENST00000549025,ENST00000546960,ENST00000549493,ENST00000550693,ENST00000547446,ENST00000547010,ENST00000546568,ENST00000547776,ENST00000547362,ENST00000333732,ENST00000550778,ENST00000549558,ENST00000341752	ENSG00000185046	ANKS1B	---	---	---	---	---
12:99772922|99812311	0	0	0	1.71665	3.3625	2.76104	0	2.61339	2.61339	0.00668463	0.921644	exon	ENST00000329257,ENST00000547776,ENST00000549866	ENSG00000185046	ANKS1B	---	---	---	---	---
13:101283933|101292366	3.1822	1.83985	0.873449	0	0	0	1.96517	0	-1.96517	0.033842	0.921644	exon	ENST00000251127,ENST00000470333,ENST00000497170	ENSG00000102452	NALCN	hsa_circ_0030787	13	101283933	101292366	-
13:19835477|19838985	4.10045	2.62281	2.93665	1.44098	0	1.28966	3.21997	0.910213	-2.30976	0.0125745	0.921644	exon	ENST00000382909,ENST00000502168,ENST00000337963	ENSG00000132950	ZMYM5	---	---	---	---	---
13:20064451|20083032	0	1.83985	1.41363	2.74778	3.3625	3.27325	1.0845	3.12784	2.04335	0.0441635	0.921644	exon	ENST00000382870,ENST00000382871,ENST00000382883,ENST00000382874,ENST00000610343	ENSG00000121741	ZMYM2	hsa_circ_0029638	13	20064451	20083032	+
13:21381434|21425678	0	0	0	1.09988	3.74203	1.28966	0	2.04386	2.04386	0.0212221	0.921644	exon	ENST00000320220,ENST00000382466,ENST00000415724,ENST00000400590	ENSG00000180776	ZDHHC20	---	---	---	---	---
13:32687134|32696902	3.4185	1.83985	1.41363	0	0	0	2.22399	0	-2.22399	0.0137785	0.921644	exon	ENST00000450460,ENST00000315596	ENSG00000083642	PDS5B	hsa_circ_0029951	13	32687134	32696902	+
13:35040933|35070852	0	2.62281	0.873449	2.74778	4.04223	3.03976	1.16542	3.27659	2.11117	0.0430956	0.921644	exon	ENST00000310336,ENST00000400445,ENST00000379939,ENST00000629018	ENSG00000172915	NBEA	hsa_circ_0029976	13	35040933	35070852	+
13:41727194|41778056	0	0	0	0.652309	3.3625	2.76104	0	2.25861	2.25861	0.0154885	0.921644	exon	ENST00000281496,ENST00000379310	ENSG00000102763	VWA8	hsa_circ_0030097	13	41727194	41778056	-
13:42168440|42187148	1.38702	2.62281	2.58309	0	0	0	2.19764	0	-2.19764	0.0263462	0.921644	exon	ENST00000628433,ENST00000627777,ENST00000337343,ENST00000261491,ENST00000498255,ENST00000379274,ENST00000536612,ENST00000626247	ENSG00000102780	DGKH	---	---	---	---	---
13:45151687|45207505	2.54748	3.1275	1.80575	2.74778	4.85078	5.15676	2.49358	4.25177	1.75819	0.00470613	0.921644	exon	ENST00000340473	ENSG00000188342	GTF2F2	hsa_circ_0007259	13	45151687	45207505	+
13:60439688|60460540	5.25375	5.11005	3.83921	3.87974	3.3625	3.8076	4.73434	3.68328	-1.05106	0.0340128	0.921644	exon	ENST00000377894,ENST00000196169,ENST00000484389,ENST00000377881,ENST00000377882,ENST00000621840,ENST00000535286	ENSG00000083544	TDRD3	hsa_circ_0004245	13	60439688	60460540	+
14:103662116|103670283	0	0	0	1.09988	3.3625	1.95955	0	2.14064	2.14064	0.0285447	0.921644	exon	ENST00000380038,ENST00000389744,ENST00000347839,ENST00000553286,ENST00000452929,ENST00000246489,ENST00000348520,ENST00000472726,ENST00000634686,ENST00000554228,ENST00000334553,ENST00000555836,ENST00000557450,ENST00000554280,ENST00000557575,ENST00000445352	ENSG00000126214,ENSG00000256500	KLC1,RP11-73M18.2	hsa_circ_0033498	14	103662116	103670283	+
14:22950314|22952683	3.7994	3.50067	4.14084	4.31219	5.5676	4.75514	3.81364	4.87831	1.06468	0.0455052	0.921644	exon	ENST00000554373,ENST00000554516,ENST00000554446,ENST00000541587,ENST00000555040,ENST00000555986,ENST00000342454,ENST00000556915,ENST00000206474,ENST00000554651,ENST00000555367,ENST00000554349	ENSG00000092036	HAUS4	hsa_circ_0005663	14	22950314	22952683	-
14:30715924|30734858	2.08091	2.62281	3.75281	0	0	0	2.81884	0	-2.81884	0.00107779	0.921644	exon	ENST00000556768,ENST00000556486,ENST00000396629,ENST00000463622,ENST00000311943,ENST00000554437,ENST00000544052,ENST00000458591,ENST00000484733	ENSG00000092108	SCFD1	hsa_circ_0000528	14	30715924	30734858	+
14:31113104|31133675	3.62148	1.83985	1.80575	0	0	0	2.42236	0	-2.42236	0.00585765	0.921644	exon	ENST00000611816,ENST00000399332,ENST00000553700	ENSG00000092148	HECTD1	hsa_circ_0031460	14	31113104	31133675	-
14:31380467|31383771	3.1822	1.83985	2.36742	0.652309	0	0	2.46316	0.217436	-2.24572	0.0348488	0.921644	exon	ENST00000543095,ENST00000549185,ENST00000550366,ENST00000538864	ENSG00000129493,ENSG00000203546	HEATR5A,RP11-176H8.1	hsa_circ_0031570	14	31380467	31383771	-
14:39064913|39085906	3.4185	1.83985	2.93665	1.09988	0	0	2.73167	0.366626	-2.36504	0.0281257	0.921644	exon	ENST00000545328,ENST00000307712,ENST00000537403	ENSG00000100934	SEC23A	---	---	---	---	---
14:60808325|60879835	3.7994	2.62281	2.11375	0	0	0	2.84532	0	-2.84532	0.000974656	0.921644	exon	ENST00000554002,ENST00000539616,ENST00000261245	ENSG00000020426	MNAT1	hsa_circ_0004244	14	60808325	60879835	+
14:80862757|80906081	3.7994	4.25234	4.44632	3.49701	2.84602	1.28966	4.16602	2.54423	-1.62179	0.0437478	0.921644	exon	ENST00000216517,ENST00000281129,ENST00000555265	ENSG00000100629	CEP128	hsa_circ_0002499	14	80862757	80906081	-
14:90676523|90689712	0	0	0	1.71665	3.3625	1.95955	0	2.34623	2.34623	0.0179067	0.921644	exon	ENST00000555005,ENST00000328459	ENSG00000165914	TTC7B	hsa_circ_0032931	14	90676523	90689712	-
14:92088730|92096838	3.7994	3.79688	0.873449	0.652309	0	0	2.82324	0.217436	-2.60581	0.0033109	0.921644	exon	ENST00000554350,ENST00000553498,ENST00000556288,ENST00000556898,ENST00000617719,ENST00000554592,ENST00000556082,ENST00000553309,ENST00000556671,ENST00000621269,ENST00000545170,ENST00000620536,ENST00000557030,ENST00000393287,ENST00000553686,ENST00000555816,ENST00000553491,ENST00000554673,ENST00000556274,ENST00000556374,ENST00000558190,ENST00000503767,ENST00000359366,ENST00000554491,ENST00000506466…	ENSG00000066427	ATXN3	---	---	---	---	---
14:92142164|92143294	1.38702	1.83985	0.873449	2.32244	4.04223	2.76104	1.36677	3.0419	1.67513	0.0477684	0.921644	exon	ENST00000298875	ENSG00000165934	CPSF2	---	---	---	---	---
15:24508861|24535806	0	0	0.873449	3.07585	2.84602	1.95955	0.29115	2.62714	2.33599	0.0377376	0.921644	exon_intron	ENST00000562244,ENST00000568045,ENST00000565512,ENST00000565893	ENSG00000259905	PWRN1	---	---	---	---	---
15:34915038|34927138	4.65711	4.04251	4.8723	3.93471	2.84602	2.76104	4.52397	3.18059	-1.34338	0.031096	0.921644	exon	ENST00000543879,ENST00000156471	ENSG00000021776	AQR	---	---	---	---	---
15:43334945|43335826	1.38702	0	0	2.47857	4.04223	1.28966	0.46234	2.60349	2.14115	0.0302545	0.921644	exon	ENST00000428046,ENST00000389651,ENST00000610420,ENST00000422466	ENSG00000168803	ADAL	hsa_circ_0034947	15	43334945	43335826	+
15:48596283|48613092	2.54748	1.83985	1.41363	3.49701	4.99777	3.8076	1.93366	4.10079	2.16714	0.00224944	0.921644	exon	ENST00000537463,ENST00000316623	ENSG00000166147	FBN1	hsa_circ_0008421	15	48596283	48613092	-
15:57451500|57461892	4.23029	4.99805	5.49499	3.63618	4.2906	2.76104	4.90778	3.5626	-1.34517	0.00761823	0.921644	exon	ENST00000281282	ENSG00000128849	CGNL1	hsa_circ_0035435	15	57451500	57461892	+
15:59671183|59680308	4.74664	2.62281	3.22039	1.94801	2.84602	1.28966	3.52994	2.02789	-1.50205	0.0223877	0.921644	exon	ENST00000415213,ENST00000267859,ENST00000612191,ENST00000607373	ENSG00000140299	BNIP2	---	---	---	---	---
15:64817946|64819223	0	0	0	1.44098	3.74203	2.76104	0	2.64802	2.64802	0.00374677	0.921644	exon	ENST00000333425,ENST00000559239,ENST00000268043	ENSG00000140451	PIF1	hsa_circ_0002205	15	64817946	64819223	-
15:65410178|65411370	2.54748	0	2.77067	3.70103	4.99777	4.19665	1.77272	4.29848	2.52576	0.00407579	0.921644	exon	ENST00000352385	ENSG00000103742	IGDCC4	---	---	---	---	---
15:65463761|65481615	0	0	0	3.17049	2.03388	1.95955	0	2.38798	2.38798	0.0160632	0.921644	exon	ENST00000559233,ENST00000300141,ENST00000321147,ENST00000341861,ENST00000395652,ENST00000358939	ENSG00000074603	DPP8	---	---	---	---	---
15:65702305|65703008	3.4185	3.50067	4.65129	2.47857	2.03388	1.28966	3.85682	1.93404	-1.92278	0.00752553	0.921644	exon	ENST00000635620,ENST00000443035,ENST00000431932,ENST00000564674	ENSG00000174485	DENND4A	hsa_circ_0007072	15	65702305	65703008	-
15:65715478|65761438	2.89947	2.62281	2.58309	1.09988	0	0	2.70179	0.366626	-2.33516	0.0450962	0.921644	exon	ENST00000443035,ENST00000431932,ENST00000568515,ENST00000564674	ENSG00000174485	DENND4A	---	---	---	---	---
15:66508841|66521205	0	0	0	1.94801	4.04223	2.76104	0	2.91709	2.91709	0.00103803	0.921644	exon	ENST00000565627,ENST00000446801,ENST00000307897,ENST00000613446	ENSG00000174442	ZWILCH	---	---	---	---	---
15:66535933|66546705	3.7994	2.62281	1.41363	1.09988	0	0	2.61195	0.366626	-2.24532	0.0287217	0.921644	exon	ENST00000565627,ENST00000446801,ENST00000307897,ENST00000613446,ENST00000535141	ENSG00000174442	ZWILCH	hsa_circ_0008168	15	66535933	66546705	+
15:77052385|77056255	0	1.83985	1.80575	2.61944	3.3625	3.94926	1.2152	3.3104	2.0952	0.0306365	0.921644	exon	ENST00000346495,ENST00000561277,ENST00000267970,ENST00000558745	ENSG00000140391	TSPAN3	hsa_circ_0000641	15	77052385	77056255	-
15:92978234|92979283	2.89947	1.83985	1.80575	0	0	0	2.18169	0	-2.18169	0.0284536	0.921644	exon	ENST00000636881,ENST00000394196,ENST00000635856,ENST00000626874,ENST00000637572,ENST00000636306	ENSG00000173575	CHD2	hsa_circ_0036988	15	92978234	92979283	+
15:99671323|99675458	3.1822	1.83985	3.08548	4.91436	3.74203	4.19665	2.70251	4.28435	1.58184	0.0170799	0.921644	exon	ENST00000558812,ENST00000557785,ENST00000449277,ENST00000557942,ENST00000338042	ENSG00000068305	MEF2A	hsa_circ_0003062	15	99671323	99675458	+
16:11894954|11898035	4.65711	5.56789	4.55244	4.18193	3.3625	3.27325	4.92581	3.60589	-1.31992	0.0139682	0.921644	exon	ENST00000439887,ENST00000568849,ENST00000420576,ENST00000434724	ENSG00000103342	GSPT1	hsa_circ_0037911	16	11894954	11898035	-
16:192927|227336	1.38702	0	0	2.32244	2.03388	3.47417	0.46234	2.61017	2.14783	0.0493523	0.921644	exon	ENST00000419516,ENST00000418978,ENST00000397780,ENST00000293872,ENST00000490762,ENST00000397783,ENST00000629543,ENST00000426094,ENST00000337351	ENSG00000007392	LUC7L	---	---	---	---	---
16:29905788|29906127	0	0	1.41363	2.14734	4.68709	2.76104	0.471212	3.19849	2.72728	0.00554301	0.921644	exon	ENST00000566693	ENSG00000174939	ASPHD1	---	---	---	---	---
16:30496097|30496566	2.08091	1.83985	1.80575	3.87974	3.3625	3.27325	1.90884	3.50516	1.59632	0.0360916	0.921644	exon	ENST00000358164,ENST00000356798	ENSG00000005844	ITGAL	---	---	---	---	---
16:3504720|3512478	0	0	0	3.34297	2.84602	2.41525	0	2.86808	2.86808	0.00236338	0.921644	exon	ENST00000576634,ENST00000574369,ENST00000571025,ENST00000341633,ENST00000573370	ENSG00000103351	CLUAP1	hsa_circ_0037602	16	3504720	3512478	+
16:47463899|47515601	3.1822	3.79688	3.83921	0.652309	0	1.95955	3.6061	0.870621	-2.73548	0.00261334	0.921644	exon	ENST00000566044,ENST00000566037	ENSG00000102893	PHKB	hsa_circ_0000697	16	47463899	47515601	+
16:57204504|57217035	3.4185	2.62281	2.11375	1.09988	0	0	2.71835	0.366626	-2.35173	0.0339567	0.921644	exon	ENST00000394420,ENST00000537866	ENSG00000159579	RSPRY1	hsa_circ_0039550	16	57204504	57217035	+
16:66608309|66610003	2.54748	1.83985	3.45739	4.08806	4.68709	4.07825	2.61491	4.28447	1.66956	0.0284666	0.921644	exon	ENST00000564060,ENST00000565666,ENST00000568477,ENST00000567572,ENST00000424011,ENST00000566121,ENST00000565003,ENST00000562707,ENST00000566756,ENST00000361909,ENST00000460097	ENSG00000140931	CMTM3	hsa_circ_0008450	16	66608309	66610003	+
16:68121987|68158068	0	0	0	1.94801	2.03388	2.76104	0	2.24764	2.24764	0.0353999	0.921644	exon	ENST00000570212,ENST00000553077,ENST00000575270,ENST00000535127,ENST00000563319,ENST00000563796,ENST00000563288,ENST00000379165,ENST00000567152,ENST00000562926,ENST00000349223,ENST00000569766,ENST00000329524,ENST00000549350,ENST00000346183,ENST00000566301	ENSG00000072736	NFATC3	hsa_circ_0039927	16	68121987	68158068	+
16:8801799|8806407	0	0	0	2.32244	2.84602	1.28966	0	2.15271	2.15271	0.0412091	0.921644	exon	ENST00000566983,ENST00000566540,ENST00000564030,ENST00000562448,ENST00000568602,ENST00000566604,ENST00000562318,ENST00000564069,ENST00000268261,ENST00000570134	ENSG00000140650	PMM2	---	---	---	---	---
17:14074323|14077056	0	0	0	1.71665	3.74203	1.28966	0	2.24945	2.24945	0.013503	0.921644	exon	ENST00000261643,ENST00000581931,ENST00000429152	ENSG00000006695	COX10	hsa_circ_0007743	17	14074323	14077056	+
17:18865469|18877870	3.95777	1.83985	4.07114	1.94801	0	0	3.28959	0.649335	-2.64025	0.034658	0.921644	exon	ENST00000268835,ENST00000419071,ENST00000487101,ENST00000610773,ENST00000414602,ENST00000492129,ENST00000570450,ENST00000455992,ENST00000419284,ENST00000422237	ENSG00000141127	PRPSAP2	hsa_circ_0042356	17	18865469	18877870	+
17:28349083|28351800	0	0	0	1.44098	3.74203	2.41525	0	2.53275	2.53275	0.0059702	0.921644	exon	ENST00000618887,ENST00000540200	ENSG00000004142	POLDIP2	hsa_circ_0042531	17	28349083	28351800	-
17:32171043|32183272	2.89947	3.50067	3.08548	4.57696	4.2906	5.42279	3.16187	4.76345	1.60158	0.00217807	0.921644	exon	ENST00000333942,ENST00000581031,ENST00000394692,ENST00000581094,ENST00000578205,ENST00000583994,ENST00000545287,ENST00000358365	ENSG00000126858	RHOT1	---	---	---	---	---
17:37283267|37289528	4.56165	2.62281	4.69828	2.86562	3.3625	2.41525	3.96091	2.88112	-1.07979	0.0338152	0.921644	exon	ENST00000617649,ENST00000615229	ENSG00000278540	ACACA	hsa_circ_0000759	17	37283267	37289528	-
17:56814869|56825321	3.7994	3.1275	4.20733	1.94801	3.3625	1.28966	3.71141	2.20005	-1.51136	0.0395407	0.921644	exon	ENST00000397861	ENSG00000214226	C17orf67	---	---	---	---	---
17:60460663|60466459	3.95777	1.83985	1.41363	1.09988	0	0	2.40375	0.366626	-2.03713	0.0378767	0.921644	exon	ENST00000589341,ENST00000083182	ENSG00000062725	APPBP2	hsa_circ_0044964	17	60460663	60466459	-
17:60683982|60709325	0	0	0	0.652309	4.04223	1.28966	0	1.99473	1.99473	0.0133874	0.921644	exon	ENST00000592393,ENST00000592848,ENST00000589916,ENST00000591147,ENST00000407086,ENST00000589222,ENST00000408905,ENST00000588168,ENST00000593004,ENST00000588462,ENST00000390652,ENST00000591371	ENSG00000141376	BCAS3	---	---	---	---	---
17:62033787|62035608	4.83094	4.74402	3.08548	1.71665	2.03388	3.03976	4.22015	2.26343	-1.95671	0.0028497	0.921644	exon	ENST00000397786	ENSG00000108510	MED13	hsa_circ_0004273	17	62033787	62035608	-
17:64562771|64571956	0	0	0	0.652309	3.3625	1.95955	0	1.99145	1.99145	0.037626	0.921644	exon	ENST00000262435,ENST00000582081,ENST00000585301,ENST00000578386	ENSG00000108854	SMURF2	---	---	---	---	---
17:66096251|66132763	0	0	0.873449	2.32244	4.2906	2.41525	0.29115	3.00943	2.71828	0.00590743	0.921644	exon	ENST00000392769,ENST00000583358,ENST00000535342	ENSG00000154240	CEP112	hsa_circ_0045355	17	66096251	66132763	-
17:69155019|69155925	5.19134	3.50067	4.07114	2.61944	3.74203	1.28966	4.25438	2.55038	-1.704	0.0112733	0.921644	exon	ENST00000519732,ENST00000269081,ENST00000523419,ENST00000518929,ENST00000522406	ENSG00000154263	ABCA10	---	---	---	---	---
17:78086503|78087093	1.38702	2.62281	1.80575	3.8226	4.2906	3.47417	1.93853	3.86246	1.92393	0.00942025	0.921644	exon	ENST00000335749,ENST00000636222,ENST00000588847,ENST00000301624,ENST00000588061	ENSG00000078687	TNRC6C	hsa_circ_0045862	17	78086503	78087093	+
17:78392476|78398351	0	0	2.11375	2.74778	4.85078	3.27325	0.704583	3.62394	2.91935	0.0236034	0.921644	exon	ENST00000585521,ENST00000592043,ENST00000589426,ENST00000589689,ENST00000262764	ENSG00000087157	PGS1	---	---	---	---	---
17:78392476|78399537	0	0	0	0.652309	2.84602	3.27325	0	2.25719	2.25719	0.015272	0.921644	exon	ENST00000592043,ENST00000589426,ENST00000589689,ENST00000262764	ENSG00000087157	PGS1	hsa_circ_0045888	17	78392476	78399537	+
17:82127692|82134194	0	0	0.873449	2.14734	3.3625	3.8076	0.29115	3.10581	2.81466	0.00552267	0.921644	exon	ENST00000419322,ENST00000392346	ENSG00000176155	CCDC57	---	---	---	---	---
17:82563354|82571870	4.74664	4.74402	5.2646	4.13576	2.84602	3.47417	4.91842	3.48532	-1.4331	0.0108342	0.921644	exon	ENST00000473637,ENST00000526383,ENST00000570585,ENST00000531030,ENST00000335255,ENST00000527313	ENSG00000141568	FOXK2	hsa_circ_0000817	17	82563354	82571870	+
18:12999421|13001582	1.38702	2.62281	2.36742	0	0	0	2.12575	0	-2.12575	0.0360373	0.921644	exon	ENST00000507064,ENST00000506447,ENST00000325971,ENST00000589596	ENSG00000101639	CEP192	hsa_circ_0046995	18	12999421	13001582	+
18:24196125|24239382	1.38702	2.62281	3.9979	0.652309	2.03388	0	2.66924	0.895398	-1.77384	0.0347888	0.921644	exon	ENST00000578055,ENST00000585247,ENST00000399443,ENST00000319481,ENST00000357041	ENSG00000141447	OSBPL1A	---	---	---	---	---
18:54277703|54284013	2.54748	1.83985	2.58309	0	0	0	2.32348	0	-2.32348	0.0193318	0.921644	exon	ENST00000579434,ENST00000406285,ENST00000579534	ENSG00000101751	POLI	---	---	---	---	---
18:56717964|56758953	0	0	0	2.14734	3.3625	1.95955	0	2.4898	2.4898	0.0116217	0.921644	exon	ENST00000254442,ENST00000357574	ENSG00000091157	WDR7	hsa_circ_0006090	18	56717964	56758953	+
18:62138243|62163656	2.08091	3.1275	2.11375	0.652309	0	0	2.44072	0.217436	-2.22329	0.0412307	0.921644	exon	ENST00000400334,ENST00000357637	ENSG00000197563	PIGN	---	---	---	---	---
18:76370528|76380303	0	0	0	2.61944	2.03388	2.41525	0	2.35619	2.35619	0.0251349	0.921644	exon	ENST00000443185	ENSG00000101493	ZNF516	hsa_circ_0003479	18	76370528	76380303	-
18:76441245|76443211	3.7994	2.62281	4.27089	5.11808	4.99777	4.40776	3.56437	4.8412	1.27684	0.0459558	0.921644	exon	ENST00000443185	ENSG00000101493	ZNF516	hsa_circ_0008699	18	76441245	76443211	-
18:9117838|9124983	2.08091	4.04251	2.36742	0.652309	2.03388	0	2.83028	0.895398	-1.93488	0.0280869	0.921644	exon	ENST00000400033,ENST00000579126,ENST00000318388	ENSG00000178127,ENSG00000265257	NDUFV2,RP11-21J18.1	---	---	---	---	---
19:10637644|10638315	0	0	0	1.09988	3.74203	1.95955	0	2.26715	2.26715	0.0126486	0.921644	exon	ENST00000591194,ENST00000335757,ENST00000589561,ENST00000586078,ENST00000407327	ENSG00000129353	SLC44A2	hsa_circ_0049303	19	10637644	10638315	+
19:12145258|12146224	2.89947	1.83985	1.41363	0	0	0	2.05099	0	-2.05099	0.0403136	0.921644	exon	ENST00000455799,ENST00000434822	ENSG00000257591,ENSG00000213297	ZNF625,ZNF625-ZNF20	---	---	---	---	---
19:20792512|20793878	3.7994	4.74402	3.45739	2.47857	3.3625	1.95955	4.00027	2.60021	-1.40006	0.0257894	0.921644	exon	ENST00000594534,ENST00000344519,ENST00000360204	ENSG00000160229	ZNF66	---	---	---	---	---
19:3425106|3435207	3.7994	3.50067	4.14084	1.71665	0	3.03976	3.81364	1.58547	-2.22817	0.0235681	0.921644	exon	ENST00000341919,ENST00000395111,ENST00000589123,ENST00000443272,ENST00000590282	ENSG00000141905	NFIC	hsa_circ_0006392	19	3425106	3435207	+
19:34430576|34434968	6.1053	5.11005	5.09936	4.57696	4.2906	3.94926	5.43824	4.27227	-1.16596	0.00560343	0.921644	exon	ENST00000607361,ENST00000246548,ENST00000439527	ENSG00000126261	UBA2	hsa_circ_0005325	19	34430576	34434968	+
19:40623604|40624082	2.54748	0	2.11375	2.97456	4.50242	3.47417	1.55374	3.65039	2.09664	0.0325025	0.921644	exon	ENST00000599724,ENST00000601032,ENST00000204005,ENST00000595118,ENST00000243562,ENST00000396819,ENST00000318809,ENST00000308370	ENSG00000090006	LTBP4	hsa_circ_0051123	19	40623604	40624082	+
19:43497118|43497876	0	0	0	2.97456	3.74203	3.03976	0	3.25212	3.25212	0.000316145	0.921644	exon	ENST00000292140,ENST00000599242	ENSG00000176531	PHLDB3	---	---	---	---	---
19:51573150|51581882	2.08091	4.04251	2.36742	0	0	0	2.83028	0	-2.83028	0.000749842	0.921644	exon	ENST00000262259	ENSG00000105497	ZNF175	hsa_circ_0052048	19	51573150	51581882	+
19:57778751|57780146	2.54748	0	0.873449	3.34297	4.2906	2.41525	1.14031	3.34961	2.2093	0.0342715	0.921644	exon	ENST00000391702,ENST00000396150,ENST00000396154	ENSG00000083828	ZNF586	---	---	---	---	---
19:6010136|6016271	2.89947	1.83985	2.58309	0	0	0	2.4408	0	-2.4408	0.0109505	0.921644	exon	ENST00000592546,ENST00000588021,ENST00000589742,ENST00000359161,ENST00000592337,ENST00000303657	ENSG00000087903	RFX2	hsa_circ_0048810	19	6010136	6016271	-
19:8468774|8474244	2.08091	1.83985	0	3.93471	2.03388	3.47417	1.30692	3.14759	1.84067	0.0455197	0.921644	exon	ENST00000325495,ENST00000600806,ENST00000348943,ENST00000597270,ENST00000620401,ENST00000600092	ENSG00000099783	HNRNPM	hsa_circ_0003765	19	8468774	8474244	+
2:106830066|106844034	0	0	0.873449	2.97456	3.3625	1.95955	0.29115	2.76554	2.47439	0.0229597	0.921644	exon	ENST00000409382,ENST00000361686,ENST00000409087	ENSG00000144057	ST6GAL2	hsa_circ_0055954	2	106830066	106844034	-
2:111944960|111947567	0	0	1.41363	3.76309	3.3625	2.76104	0.471212	3.29554	2.82433	0.00813979	0.921644	exon	ENST00000421804,ENST00000439966,ENST00000409780,ENST00000295408,ENST00000616902	ENSG00000153208	MERTK	hsa_circ_0056121	2	111944960	111947567	+
2:121503167|121530325	3.1822	4.43549	3.34375	4.67708	4.99777	4.96988	3.65381	4.88158	1.22776	0.0242803	0.921644	exon	ENST00000409078,ENST00000397587,ENST00000455322,ENST00000263710,ENST00000541377	ENSG00000074054	CLASP1	hsa_circ_0002374	2	121503167	121530325	-
2:121757240|121763084	2.54748	3.50067	3.75281	1.94801	0	1.95955	3.26699	1.30252	-1.96447	0.0480012	0.921644	exon	ENST00000467324,ENST00000389682,ENST00000409193,ENST00000490104,ENST00000455432	ENSG00000211460	TSN	hsa_circ_0003789	2	121757240	121763084	+
2:127989564|127989866	2.89947	3.79688	3.45739	0	0	1.28966	3.38458	0.429887	-2.95469	0.00145447	0.921644	exon	ENST00000357702,ENST00000259235,ENST00000259234	ENSG00000136715	SAP130	hsa_circ_0003525	2	127989564	127989866	-
2:144564697|144579335	0	0	0	1.09988	3.3625	2.41525	0	2.29254	2.29254	0.0177789	0.921644	exon_intron	ENST00000413525	ENSG00000232606	LINC01412	---	---	---	---	---
2:15327750|15330765	0	0	0.873449	2.61944	4.04223	1.28966	0.29115	2.65045	2.3593	0.0170923	0.921644	exon	ENST00000442506,ENST00000281513	ENSG00000151779	NBAS	hsa_circ_0052728	2	15327750	15330765	-
2:159777938|159783469	3.62148	3.50067	4.60271	2.86562	0	1.28966	3.90829	1.38509	-2.52319	0.012615	0.921644	exon	ENST00000505052,ENST00000259053,ENST00000480212,ENST00000429078,ENST00000504764	ENSG00000248672,ENSG00000241399	LY75-CD302,CD302	---	---	---	---	---
2:159955199|159970212	2.08091	1.83985	2.58309	0	0	0	2.16795	0	-2.16795	0.0357459	0.921644	exon	ENST00000283243,ENST00000392771	ENSG00000153246	PLA2R1	---	---	---	---	---
2:171325841|171330698	3.4185	4.04251	3.83921	1.71665	0	0	3.76674	0.572217	-3.19452	0.00141967	0.921644	exon	ENST00000483284,ENST00000447486,ENST00000612742,ENST00000392604,ENST00000375258,ENST00000438609	ENSG00000123600	METTL8	---	---	---	---	---
2:172960760|172967444	0	0	0	1.44098	2.84602	3.27325	0	2.52008	2.52008	0.0084567	0.921644	exon	ENST00000397081,ENST00000540783,ENST00000409036,ENST00000397087	ENSG00000091428	RAPGEF4	---	---	---	---	---
2:175080660|175097593	0	0	0	1.44098	3.3625	3.03976	0	2.61441	2.61441	0.00545441	0.921644	exon	ENST00000429579,ENST00000345739,ENST00000538946,ENST00000428760,ENST00000417080,ENST00000421438,ENST00000415955,ENST00000409437,ENST00000392544,ENST00000409635,ENST00000264110,ENST00000426833,ENST00000456655	ENSG00000115966	ATF2	---	---	---	---	---
2:175080660|175121540	0	0	0	1.94801	2.03388	2.76104	0	2.24764	2.24764	0.0353999	0.921644	exon	ENST00000429579,ENST00000428760,ENST00000417080,ENST00000421438,ENST00000409437,ENST00000392544,ENST00000264110,ENST00000426833	ENSG00000115966	ATF2	hsa_circ_0057144	2	175080660	175121540	-
2:175970764|175995646	4.91058	4.25234	2.93665	2.61944	0	2.41525	4.03319	1.67823	-2.35496	0.00634378	0.921644	exon	ENST00000544803,ENST00000392540,ENST00000409660,ENST00000272748	ENSG00000144320	LNPK	hsa_circ_0005775	2	175970764	175995646	-
2:182976893|182989186	0	0	0	1.09988	2.84602	3.03976	0	2.32855	2.32855	0.0171072	0.921644	exon	ENST00000360982,ENST00000361354	ENSG00000061676	NCKAP1	hsa_circ_0057282	2	182976893	182989186	-
2:185889509|185952902	4.23029	3.1275	2.11375	1.44098	0	0	3.15718	0.480325	-2.67686	0.00812883	0.921644	intergenic region	n/a	n/a	---	---	---	---	---	---
2:189225148|189348196	0	0	0	2.14734	2.03388	3.6505	0	2.61057	2.61057	0.00469966	0.921644	exon_intron	ENST00000395181	ENSG00000213601	KRT18P19	---	---	---	---	---
2:200853903|200855086	1.38702	3.1275	2.36742	0	0	0	2.29398	0	-2.29398	0.0150159	0.921644	exon	ENST00000434813,ENST00000473565,ENST00000621181,ENST00000461981,ENST00000409769,ENST00000432425,ENST00000321356	ENSG00000013441	CLK1	hsa_circ_0003941	2	200853903	200855086	-
2:202811746|202821481	3.62148	0	2.58309	0.652309	0	0	2.06819	0.217436	-1.85075	0.0372822	0.921644	exon	ENST00000617388,ENST00000438804,ENST00000358299,ENST00000392237	ENSG00000163596	ICA1L	---	---	---	---	---
2:202811746|202829016	4.45943	1.83985	3.75281	1.94801	2.03388	1.28966	3.3507	1.75718	-1.59351	0.015645	0.921644	exon	ENST00000617388,ENST00000438804,ENST00000358299,ENST00000392237	ENSG00000163596	ICA1L	hsa_circ_0057823	2	202811746	202829016	-
2:20297553|20327378	2.08091	2.62281	2.77067	0	0	0	2.49147	0	-2.49147	0.0100426	0.921644	exon	ENST00000403432,ENST00000319801,ENST00000361078,ENST00000338086	ENSG00000055917	PUM2	hsa_circ_0003733	2	20297553	20327378	-
2:205440370|205440672	5.05778	4.59799	4.07114	3.63618	3.3625	3.47417	4.57563	3.49095	-1.08469	0.0321485	0.921644	exon	ENST00000406610,ENST00000614500,ENST00000613457,ENST00000358768,ENST00000351153	ENSG00000116117	PARD3B	hsa_circ_0004575	2	205440370	205440672	+
2:219566830|219568324	2.08091	1.83985	1.80575	3.42204	4.99777	1.28966	1.90884	3.23649	1.32765	0.0283326	0.921644	exon	ENST00000373873,ENST00000465149,ENST00000603926,ENST00000404537,ENST00000289656,ENST00000373876	ENSG00000124006	OBSL1	hsa_circ_0007065	2	219566830	219568324	-
2:220753613|220776862	2.89947	1.83985	3.83921	1.09988	0	1.28966	2.85951	0.796513	-2.063	0.0256683	0.921644	intergenic region	n/a	n/a	---	---	---	---	---	---
2:223998115|224001922	6.17146	6.93366	6.63198	5.21008	5.5676	5.76697	6.57904	5.51488	-1.06415	0.000590906	0.921644	exon	ENST00000447280,ENST00000258405,ENST00000409840,ENST00000409304,ENST00000432738	ENSG00000135919	SERPINE2	hsa_circ_0001103	2	223998115	224001922	-
2:232806491|232812491	0	0	0	1.71665	2.03388	3.27325	0	2.34126	2.34126	0.0173645	0.921644	exon	ENST00000409196,ENST00000409547,ENST00000440945,ENST00000409451,ENST00000423659,ENST00000629305,ENST00000409480,ENST00000373563	ENSG00000204120	GIGYF2	---	---	---	---	---
2:233256102|233273052	0	0	0	1.44098	3.74203	1.28966	0	2.15756	2.15756	0.0168041	0.921644	exon	ENST00000474148,ENST00000417017,ENST00000392020,ENST00000347464,ENST00000373525,ENST00000444735,ENST00000479942,ENST00000392018,ENST00000419681,ENST00000392021,ENST00000392017	ENSG00000085978	ATG16L1	---	---	---	---	---
2:235930765|235968623	1.38702	1.83985	2.11375	2.32244	3.74203	4.30606	1.78021	3.45684	1.67664	0.0296454	0.921644	exon	ENST00000448025,ENST00000428334,ENST00000304032	ENSG00000157985	AGAP1	hsa_circ_0003272	2	235930765	235968623	+
2:24135119|24147086	6.40938	5.85186	4.33177	4.74015	3.74203	4.40776	5.531	4.29665	-1.23435	0.0324467	0.921644	exon	ENST00000613899,ENST00000610442,ENST00000611127,ENST00000615575	ENSG00000219626,ENSG00000276087	FAM228B,RP11-507M3.1	hsa_circ_0000982	2	24135119	24147086	+
2:241407537|241431774	2.89947	1.83985	1.80575	0	0	0	2.18169	0	-2.18169	0.0284536	0.921644	exon	ENST00000627550,ENST00000264042,ENST00000373287	ENSG00000006607	FARP2	---	---	---	---	---
2:24563904|24584560	5.42626	5.21398	5.09936	3.17049	3.74203	4.19665	5.24653	3.70306	-1.54348	0.000785633	0.921644	exon_intron	ENST00000395856,ENST00000407230,ENST00000405141,ENST00000348332,ENST00000406961,ENST00000288599,ENST00000469850,ENST00000496333,ENST00000483904	ENSG00000084676	NCOA1	hsa_circ_0000983	2	24563904	24584560	+
2:29131258|29135666	2.08091	0	2.77067	3.98766	4.99777	3.27325	1.6172	4.08623	2.46903	0.00675513	0.921644	exon	ENST00000320081,ENST00000456385,ENST00000415891,ENST00000404424,ENST00000401617,ENST00000401605	ENSG00000115295	CLIP4	hsa_circ_0006348	2	29131258	29135666	+
2:31917926|31932135	5.05778	3.79688	3.45739	3.07585	3.3625	2.41525	4.10401	2.9512	-1.15282	0.0377429	0.921644	exon	ENST00000379383,ENST00000446765,ENST00000404530,ENST00000490459,ENST00000413686,ENST00000295065	ENSG00000162959,ENSG00000162961	MEMO1,DPY30	hsa_circ_0007385	2	31917926	31932135	-
2:32098796|32116212	4.3494	2.62281	1.80575	0	0	0	2.92599	0	-2.92599	0.000259293	0.921644	exon	ENST00000315285,ENST00000615843,ENST00000621856	ENSG00000021574	SPAST	---	---	---	---	---
2:36396614|36464655	2.54748	2.62281	3.08548	4.08806	4.2906	4.50275	2.75192	4.29381	1.54188	0.0150303	0.921644	exon	ENST00000280527	ENSG00000150938	CRIM1	hsa_circ_0005579	2	36396614	36464655	+
2:40160765|40177855	2.89947	0	3.34375	0.652309	0	0	2.08107	0.217436	-1.86364	0.0414511	0.921644	exon	ENST00000406785,ENST00000406391,ENST00000405269,ENST00000408028,ENST00000402441,ENST00000407929	ENSG00000183023	SLC8A1	---	---	---	---	---
2:43726272|43738520	5.1261	4.04251	4.50035	3.17049	2.84602	1.95955	4.55632	2.65869	-1.89763	0.00160015	0.921644	exon	ENST00000405000,ENST00000282406,ENST00000405223	ENSG00000152527	PLEKHH2	---	---	---	---	---
2:43973607|43982434	3.95777	3.79688	2.36742	2.14734	0	1.28966	3.37402	1.14567	-2.22836	0.0251756	0.921644	exon	ENST00000260665,ENST00000409659,ENST00000409946	ENSG00000138095	LRPPRC	---	---	---	---	---
2:48646453|48669982	2.89947	2.62281	1.80575	0	0	0	2.44268	0	-2.44268	0.0110945	0.921644	exon	ENST00000394754,ENST00000405008,ENST00000402114,ENST00000430487,ENST00000403751,ENST00000394751	ENSG00000068781,ENSG00000242441	STON1-GTF2A1L,GTF2A1L	---	---	---	---	---
2:62943802|62949162	4.3494	4.04251	1.80575	1.94801	2.03388	1.95955	3.39922	1.98048	-1.41874	0.0281191	0.921644	exon	ENST00000405015,ENST00000405289,ENST00000263991,ENST00000431489	ENSG00000115504	EHBP1	---	---	---	---	---
2:88182699|88183073	1.38702	1.83985	3.9979	0	0	0	2.40826	0	-2.40826	0.00270703	0.921644	exon	ENST00000496844,ENST00000464022,ENST00000324166,ENST00000377254,ENST00000476349,ENST00000343544,ENST00000496165	ENSG00000144115	THNSL2	hsa_circ_0055554	2	88182699	88183073	+
2:9318524|9327911	1.38702	3.1275	2.58309	3.07585	4.85078	3.94926	2.36587	3.95863	1.59276	0.031402	0.921644	exon	ENST00000315273,ENST00000281419	ENSG00000151693	ASAP2	hsa_circ_0002362	2	9318524	9327911	+
2:97144518|97187226	0	0	0	1.44098	2.84602	2.41525	0	2.23408	2.23408	0.0336713	0.921644	exon	ENST00000461153,ENST00000420699	ENSG00000135976	ANKRD36	---	---	---	---	---
20:13559008|13580981	3.62148	2.62281	4.14084	1.71665	0	2.41525	3.46171	1.3773	-2.08441	0.0244739	0.921644	exon	ENST00000480436,ENST00000455532,ENST00000337743	ENSG00000089123	TASP1	hsa_circ_0002001	20	13559008	13580981	-
20:26018832|26019924	3.1822	3.1275	3.92074	0	0	1.95955	3.41015	0.653185	-2.75696	0.00720417	0.921644	exon	ENST00000376401	ENSG00000204556	CTD-2514C3.1	---	---	---	---	---
20:32366384|32369123	4.65711	4.43549	3.34375	2.32244	2.03388	3.27325	4.14545	2.54319	-1.60226	0.0154988	0.921644	exon	ENST00000542461,ENST00000555343,ENST00000306058,ENST00000497249,ENST00000613218,ENST00000375687,ENST00000470145,ENST00000620121,ENST00000375689	ENSG00000171456	ASXL1	hsa_circ_0001136	20	32366384	32369123	+
20:35716740|35732135	2.54748	3.1275	1.41363	0	0	0	2.36287	0	-2.36287	0.011791	0.921644	exon	ENST00000429968,ENST00000253363,ENST00000528062,ENST00000361162,ENST00000461283,ENST00000463004,ENST00000492779,ENST00000338163,ENST00000444878,ENST00000403542	ENSG00000131051	RBM39	---	---	---	---	---
20:35847350|35863400	2.89947	3.1275	3.92074	0	0	1.95955	3.3159	0.653185	-2.66272	0.0105763	0.921644	exon	ENST00000461122,ENST00000374012,ENST00000339089,ENST00000374000,ENST00000481202	ENSG00000025293	PHF20	---	---	---	---	---
20:3910577|3912634	2.54748	2.62281	1.80575	0	0	0	2.32535	0	-2.32535	0.0195405	0.921644	exon	ENST00000610179,ENST00000464452,ENST00000336066,ENST00000497424,ENST00000621507,ENST00000495692,ENST00000316562	ENSG00000125779	PANK2	---	---	---	---	---
20:41512846|41533570	4.56165	3.50067	2.77067	2.32244	0	2.41525	3.611	1.57923	-2.03177	0.0283965	0.921644	exon	ENST00000373233,ENST00000373222	ENSG00000124177	CHD6	hsa_circ_0004359	20	41512846	41533570	-
20:44511289|44514040	3.1822	2.62281	3.08548	1.09988	0	1.28966	2.9635	0.796513	-2.16698	0.0319802	0.921644	exon	ENST00000342374,ENST00000255175	ENSG00000132824	SERINC3	hsa_circ_0060491	20	44511289	44514040	-
20:49090742|49094963	4.3494	3.79688	3.75281	2.32244	2.03388	1.28966	3.96636	1.882	-2.08437	0.0038151	0.921644	exon	ENST00000262982,ENST00000396192	ENSG00000124207	CSE1L	hsa_circ_0060762	20	49090742	49094963	+
20:49855438|49864844	0	0	0	2.61944	3.3625	1.28966	0	2.42387	2.42387	0.0114212	0.921644	exon	ENST00000361573,ENST00000417961	ENSG00000197818	SLC9A8	hsa_circ_0060816	20	49855438	49864844	+
20:50902017|50904001	2.08091	2.62281	2.36742	0	0	0	2.35705	0	-2.35705	0.0185435	0.921644	exon	ENST00000396032,ENST00000349014,ENST00000621696,ENST00000371602,ENST00000534467,ENST00000396029	ENSG00000101126	ADNP	---	---	---	---	---
21:25741573|25758204	0	0	0.873449	2.74778	2.84602	2.41525	0.29115	2.66968	2.37853	0.0391814	0.921644	exon	ENST00000400075,ENST00000354828	ENSG00000154727	GABPA	hsa_circ_0061327	21	25741573	25758204	+
21:28986139|28986934	1.38702	3.50067	2.58309	0	0	1.28966	2.49026	0.429887	-2.06037	0.0449186	0.921644	exon	ENST00000389195,ENST00000361371,ENST00000389194,ENST00000614971	ENSG00000198862	LTN1	hsa_circ_0061363	21	28986139	28986934	-
21:33750143|33761986	3.1822	3.1275	1.41363	0	0	1.28966	2.57445	0.429887	-2.14456	0.0386872	0.921644	exon	ENST00000399355,ENST00000381318,ENST00000381291,ENST00000399352,ENST00000399338,ENST00000379960,ENST00000399349,ENST00000399367	ENSG00000205726	ITSN1	hsa_circ_0061562	21	33750143	33761986	+
21:37108392|37148647	2.89947	1.83985	1.41363	0	0	0	2.05099	0	-2.05099	0.0403136	0.921644	exon	ENST00000450533,ENST00000399017,ENST00000485402,ENST00000476784,ENST00000438055,ENST00000479930,ENST00000354749,ENST00000540756,ENST00000355666,ENST00000418766,ENST00000481605	ENSG00000182670	TTC3	---	---	---	---	---
21:39224408|39238573	0	0	0	0.652309	3.3625	2.76104	0	2.25861	2.25861	0.0154885	0.921644	exon	ENST00000380800,ENST00000446924,ENST00000333229,ENST00000342449	ENSG00000185658	BRWD1	hsa_circ_0061728	21	39224408	39238573	-
22:25678816|25690283	2.08091	3.50067	2.11375	0	0	1.28966	2.56511	0.429887	-2.13522	0.0430427	0.921644	exon	ENST00000324198,ENST00000619906	ENSG00000100077	GRK3	---	---	---	---	---
22:28694032|28695873	1.38702	0	0	3.25931	3.3625	3.6505	0.46234	3.4241	2.96176	0.00275234	0.921644	exon	ENST00000404276,ENST00000416671,ENST00000403642,ENST00000448511,ENST00000382580,ENST00000348295,ENST00000433728,ENST00000328354,ENST00000434810,ENST00000405598,ENST00000417588,ENST00000402731	ENSG00000183765	CHEK2	hsa_circ_0004811	22	28694032	28695873	-
22:31258291|31260077	0	0	1.41363	2.61944	4.68709	2.76104	0.471212	3.35586	2.88465	0.00349256	0.921644	exon	ENST00000333611,ENST00000406516,ENST00000331728,ENST00000340552	ENSG00000182541	LIMK2	hsa_circ_0062885	22	31258291	31260077	+
22:38636451|38639724	0	1.83985	0	2.32244	3.3625	3.03976	0.613285	2.90823	2.29495	0.0345513	0.921644	exon	ENST00000540952,ENST00000535113,ENST00000544346,ENST00000355830	ENSG00000184949	FAM227A	hsa_circ_0063343	22	38636451	38639724	-
22:46974290|46997709	3.4185	1.83985	1.41363	0	0	0	2.22399	0	-2.22399	0.0137785	0.921644	exon	ENST00000337137,ENST00000406733,ENST00000355704,ENST00000380995,ENST00000407381,ENST00000394449	ENSG00000054611	TBC1D22A	hsa_circ_0001252	22	46974290	46997709	+
3:100732508|100736716	3.62148	3.50067	3.75281	0.652309	0	0	3.62499	0.217436	-3.40755	0.000198887	0.921644	exon	ENST00000490574,ENST00000240851,ENST00000620299,ENST00000615993	ENSG00000114354	TFG	hsa_circ_0008839	3	100732508	100736716	+
3:100885536|100902686	1.38702	0	0	2.86562	2.03388	3.47417	0.46234	2.79123	2.32889	0.028222	0.921644	exon	ENST00000527258,ENST00000495063,ENST00000475896,ENST00000471714,ENST00000284322	ENSG00000154175	ABI3BP	---	---	---	---	---
3:105670233|105685466	1.38702	0	0	2.47857	3.3625	3.03976	0.46234	2.96028	2.49794	0.0209634	0.921644	exon	ENST00000394030,ENST00000264122	ENSG00000114423	CBLB	---	---	---	---	---
3:11358418|11380052	3.62148	3.50067	4.39018	4.54198	4.68709	5.60512	3.83744	4.94473	1.10729	0.0389341	0.921644	exon	ENST00000446450,ENST00000354449	ENSG00000197548	ATG7	hsa_circ_0008927	3	11358418	11380052	+
3:121045435|121157627	0	0	0	1.09988	4.04223	1.28966	0	2.14392	2.14392	0.00998842	0.921644	exon	ENST00000471454,ENST00000492541,ENST00000273666,ENST00000472879,ENST00000461772,ENST00000471262,ENST00000497029	ENSG00000145087	STXBP5L	---	---	---	---	---
3:121114925|121157627	3.62148	2.62281	3.45739	0	0	1.28966	3.23389	0.429887	-2.80401	0.00299624	0.921644	exon	ENST00000471454,ENST00000492541,ENST00000273666,ENST00000472879,ENST00000461772,ENST00000471262,ENST00000497029	ENSG00000145087	STXBP5L	---	---	---	---	---
3:124817621|124848558	0	0	0	1.09988	3.3625	1.28966	0	1.91734	1.91734	0.0480672	0.921644	exon	ENST00000296181	ENSG00000082781	ITGB5	---	---	---	---	---
3:12516611|12532773	4.65711	3.50067	1.41363	1.09988	0	0	3.19047	0.366626	-2.82384	0.00701544	0.921644	exon	ENST00000415684,ENST00000473755,ENST00000402228,ENST00000284995,ENST00000454502	ENSG00000154743	TSEN2	---	---	---	---	---
3:130967145|130969396	2.08091	3.50067	3.83921	1.09988	0	1.95955	3.14027	1.01981	-2.12046	0.0237994	0.921644	exon	ENST00000514654,ENST00000504948,ENST00000504381,ENST00000505330,ENST00000504571,ENST00000533801,ENST00000507488,ENST00000422190,ENST00000510168,ENST00000504612,ENST00000359644,ENST00000428331,ENST00000508532,ENST00000328560,ENST00000513801	ENSG00000017260	ATP2C1	---	---	---	---	---
3:136377660|136423044	3.7994	4.04251	3.9979	2.97456	2.03388	0	3.9466	1.66948	-2.27712	0.0252545	0.921644	exon	ENST00000629124,ENST00000383202,ENST00000236698,ENST00000434713,ENST00000483235	ENSG00000118007	STAG1	hsa_circ_0005023	3	136377660	136423044	-
3:136417885|136423044	3.4185	1.83985	2.11375	0	0	0	2.45737	0	-2.45737	0.00696982	0.921644	exon	ENST00000629124,ENST00000487065,ENST00000383202,ENST00000236698,ENST00000434713,ENST00000483235	ENSG00000118007	STAG1	---	---	---	---	---
3:138263739|138274544	0	1.83985	1.41363	3.07585	3.74203	2.41525	1.0845	3.07771	1.99322	0.0453082	0.921644	exon	ENST00000491704,ENST00000469044,ENST00000481646,ENST00000466762,ENST00000538260,ENST00000485396,ENST00000460495,ENST00000461822	ENSG00000114098	ARMC8	---	---	---	---	---
3:138681967|138684803	2.54748	3.1275	3.56273	4.22667	4.85078	4.19665	3.07924	4.4247	1.34546	0.0341257	0.921644	exon	ENST00000289153,ENST00000493568,ENST00000544716,ENST00000481749,ENST00000462898,ENST00000469284,ENST00000477593	ENSG00000051382	PIK3CB	hsa_circ_0004431	3	138681967	138684803	-
3:15217425|15220981	0	0	0	1.09988	2.84602	2.41525	0	2.12038	2.12038	0.0430556	0.921644	exon	ENST00000253693,ENST00000457023	ENSG00000131375	CAPN7	---	---	---	---	---
3:155893518|155906263	4.45943	4.74402	3.34375	2.97456	2.84602	3.27325	4.1824	3.03128	-1.15112	0.0421681	0.921644	exon	ENST00000496455	ENSG00000163655	GMPS	hsa_circ_0008929	3	155893518	155906263	+
3:160521779|160528039	0	0	0	1.44098	3.3625	2.41525	0	2.40624	2.40624	0.0137638	0.921644	exon	ENST00000334256	ENSG00000186432	KPNA4	---	---	---	---	---
3:174523413|174553757	5.58032	3.1275	2.93665	2.47857	0	2.76104	3.88149	1.74654	-2.13496	0.0477713	0.921644	exon_intron	ENST00000489729,ENST00000482228,ENST00000434257,ENST00000481679,ENST00000495900	ENSG00000177694	NAALADL2	---	---	---	---	---
3:179859062|179898246	3.4185	1.83985	2.77067	0.652309	0	0	2.67634	0.217436	-2.4589	0.0147155	0.921644	exon	ENST00000467460,ENST00000476138,ENST00000465751,ENST00000392649,ENST00000263962,ENST00000464614	ENSG00000114757	PEX5L	---	---	---	---	---
3:183033991|183041750	1.38702	3.1275	2.58309	0	0	0	2.36587	0	-2.36587	0.0111531	0.921644	exon	ENST00000629669,ENST00000497830,ENST00000497959,ENST00000265594,ENST00000476176,ENST00000492597,ENST00000610757,ENST00000495767	ENSG00000078070	MCCC1	---	---	---	---	---
3:195306511|195336976	0	0	0	0.652309	3.74203	3.03976	0	2.47803	2.47803	0.00472329	0.921644	exon	ENST00000618471,ENST00000326793,ENST00000439758,ENST00000635383	ENSG00000114331	ACAP2	---	---	---	---	---
3:197814908|197820430	5.25375	4.59799	3.92074	3.42204	2.03388	3.27325	4.59082	2.90973	-1.6811	0.00715182	0.921644	exon	ENST00000414675,ENST00000334859,ENST00000425562,ENST00000438796	ENSG00000186001	LRCH3	hsa_circ_0002266	3	197814908	197820430	+
3:20095263|20114988	3.1822	2.62281	1.41363	0	0	0	2.40621	0	-2.40621	0.00930719	0.921644	exon	ENST00000263754	ENSG00000114166	KAT2B	---	---	---	---	---
3:44629065|44631221	0	0	0	1.71665	2.84602	1.95955	0	2.17407	2.17407	0.0448182	0.921644	exon	ENST00000396058,ENST00000383745	ENSG00000186448	ZNF197	---	---	---	---	---
3:47056821|47067118	3.62148	3.1275	3.83921	4.70896	4.68709	4.75514	3.5294	4.71706	1.18766	0.0311179	0.921644	exon	ENST00000431180,ENST00000445387,ENST00000409792,ENST00000330022	ENSG00000181555	SETD2	hsa_circ_0002569	3	47056821	47067118	-
3:48450037|48454418	0	0	0	2.74778	2.84602	2.41525	0	2.66968	2.66968	0.00753574	0.921644	exon	ENST00000320211,ENST00000635464,ENST00000635082,ENST00000634384,ENST00000346691,ENST00000635099,ENST00000357105,ENST00000412052	ENSG00000164053,ENSG00000282827	ATRIP	hsa_circ_0065384	3	48450037	48454418	+
3:50105549|50107569	0	0	0	1.09988	3.3625	1.28966	0	1.91734	1.91734	0.0480672	0.921644	exon	ENST00000395174,ENST00000464087,ENST00000474818,ENST00000496179,ENST00000347869	ENSG00000003756	RBM5	hsa_circ_0065805	3	50105549	50107569	+
3:51416787|51418876	0	0	0	1.94801	3.3625	1.28966	0	2.20005	2.20005	0.024973	0.921644	exon	ENST00000423656,ENST00000335891,ENST00000504652	ENSG00000145041	DCAF1	hsa_circ_0065898	3	51416787	51418876	-
3:66243203|66263379	0	0	0	0.652309	3.74203	3.6505	0	2.68161	2.68161	0.00636102	0.921644	exon	ENST00000354883,ENST00000336733,ENST00000413054,ENST00000483224,ENST00000464350	ENSG00000144741	SLC25A26	hsa_circ_0004113	3	66243203	66263379	+
4:109491327|109494856	3.62148	4.25234	4.20733	5.16481	5.36583	4.90179	4.02705	5.14414	1.11709	0.0181601	0.921644	exon	ENST00000399100,ENST00000504968,ENST00000265175	ENSG00000138802	SEC24B	hsa_circ_0001436	4	109491327	109494856	+
4:119596523|119607297	1.38702	0	3.34375	3.93471	4.50242	4.59188	1.57692	4.343	2.76608	0.0327996	0.921644	exon	ENST00000354960,ENST00000394439,ENST00000264805	ENSG00000138735	PDE5A	hsa_circ_0002474	4	119596523	119607297	-
4:128077788|128082305	0	0	0	1.44098	2.84602	2.41525	0	2.23408	2.23408	0.0336713	0.921644	exon	ENST00000432347,ENST00000512292,ENST00000394288,ENST00000326639	ENSG00000138709	LARP1B	---	---	---	---	---
4:128121826|128179512	1.38702	3.1275	2.11375	0	0	0	2.20942	0	-2.20942	0.020348	0.921644	exon	ENST00000326639	ENSG00000138709	LARP1B	hsa_circ_0070942	4	128121826	128179512	+
4:128970378|129003876	0	1.83985	0	1.71665	2.84602	4.07825	0.613285	2.88031	2.26702	0.0188095	0.921644	exon	ENST00000281142	ENSG00000151466	SCLT1	hsa_circ_0007233	4	128970378	129003876	-
4:145823422|145903215	0	0	0	1.09988	3.3625	1.95955	0	2.14064	2.14064	0.0285447	0.921644	exon	ENST00000508784,ENST00000379448	ENSG00000151612	ZNF827	---	---	---	---	---
4:151127618|151135132	2.89947	2.62281	2.11375	0	0	0	2.54534	0	-2.54534	0.00787465	0.921644	exon	ENST00000409598,ENST00000514152,ENST00000478503,ENST00000604030,ENST00000304527,ENST00000427414,ENST00000409252	ENSG00000109686	SH3D19	---	---	---	---	---
4:182891403|182915575	2.08091	0	2.36742	2.86562	2.84602	4.59188	1.48278	3.43451	1.95173	0.0388628	0.921644	exon	ENST00000510370,ENST00000438320,ENST00000500813,ENST00000507631,ENST00000507543,ENST00000357067	ENSG00000129187	DCTD	hsa_circ_0002212	4	182891403	182915575	-
4:183693589|183701808	3.62148	4.43549	2.36742	0.652309	0	1.95955	3.4748	0.870621	-2.60418	0.00340688	0.921644	exon	ENST00000505676,ENST00000357207,ENST00000512476,ENST00000334690	ENSG00000168538	TRAPPC11	hsa_circ_0071515	4	183693589	183701808	+
4:184661774|184682336	2.08091	3.1275	2.11375	0	0	0	2.44072	0	-2.44072	0.0106249	0.921644	exon	ENST00000512834,ENST00000515774,ENST00000503752,ENST00000314970	ENSG00000164306	PRIMPOL	---	---	---	---	---
4:2490337|2497121	0	1.83985	2.36742	3.49701	4.85078	3.47417	1.40243	3.94065	2.53823	0.00473272	0.921644	exon	ENST00000507784,ENST00000511843,ENST00000509258,ENST00000502316,ENST00000511859,ENST00000513284,ENST00000511600,ENST00000506706,ENST00000504224,ENST00000314289,ENST00000513450,ENST00000507247,ENST00000513578,ENST00000541204	ENSG00000063978	RNF4	hsa_circ_0008872	4	2490337	2497121	+
4:3004231|3013828	0	0	1.41363	3.07585	3.3625	3.03976	0.471212	3.15937	2.68816	0.0175105	0.921644	exon	ENST00000504933,ENST00000398052,ENST00000345167,ENST00000398051	ENSG00000125388	GRK4	---	---	---	---	---
4:39869394|39890364	1.38702	0	0	1.44098	4.04223	2.76104	0.46234	2.74808	2.28574	0.0219789	0.921644	exon	ENST00000303538	ENSG00000121892	PDS5A	---	---	---	---	---
4:39874289|39890364	0	0	0	2.47857	2.84602	1.28966	0	2.20475	2.20475	0.0336388	0.921644	exon	ENST00000303538	ENSG00000121892	PDS5A	---	---	---	---	---
4:39898389|39904191	0	0	0.873449	2.61944	2.03388	3.03976	0.29115	2.56436	2.27321	0.045823	0.921644	exon	ENST00000503396,ENST00000303538	ENSG00000121892	PDS5A	---	---	---	---	---
4:40890364|40893411	2.08091	1.83985	2.11375	4.18193	2.84602	3.47417	2.01151	3.50071	1.4892	0.0386777	0.921644	exon	ENST00000514094,ENST00000508593,ENST00000506352,ENST00000513140,ENST00000295974,ENST00000513611,ENST00000509475	ENSG00000163697	APBB2	hsa_circ_0069559	4	40890364	40893411	-
4:4237827|4246343	2.54748	2.62281	2.11375	4.27007	4.04223	3.8076	2.42801	4.03997	1.61195	0.0131633	0.921644	exon	ENST00000254742,ENST00000382753	ENSG00000132406	TMEM128	hsa_circ_0005963	4	4237827	4246343	-
4:73064778|73065413	0	0	0.873449	1.71665	3.3625	2.76104	0.29115	2.61339	2.32225	0.0365408	0.921644	exon	ENST00000449739,ENST00000510031,ENST00000507544,ENST00000295890	ENSG00000163626	COX18	hsa_circ_0069931	4	73064778	73065413	-
4:75806486|75812375	4.10045	3.79688	3.34375	2.32244	0	2.76104	3.74703	1.69449	-2.05253	0.0366578	0.921644	exon	ENST00000264904,ENST00000514213	ENSG00000138768	USO1	hsa_circ_0070012	4	75806486	75812375	+
4:86354530|86399806	3.95777	2.62281	2.58309	1.44098	0	1.28966	3.05455	0.910213	-2.14434	0.0254523	0.921644	exon	ENST00000504397,ENST00000513839	ENSG00000109339	MAPK10	---	---	---	---	---
4:86686710|86701801	3.62148	1.83985	3.34375	1.44098	2.03388	0	2.93503	1.15829	-1.77674	0.0494677	0.921644	exon	ENST00000316707,ENST00000511467,ENST00000427191,ENST00000436978,ENST00000411767	ENSG00000163629	PTPN13	hsa_circ_0070358	4	86686710	86701801	+
4:88475841|88494331	4.10045	4.04251	3.83921	2.32244	2.03388	2.41525	3.99406	2.25719	-1.73687	0.00865283	0.921644	exon	ENST00000502913,ENST00000508159,ENST00000510223,ENST00000264350	ENSG00000138646	HERC5	hsa_circ_0001426	4	88475841	88494331	+
4:88649840|88658491	0	1.83985	0	2.74778	4.04223	2.41525	0.613285	3.06842	2.45514	0.0136877	0.921644	exon	ENST00000264345,ENST00000402738	ENSG00000138641	HERC3	hsa_circ_0006387	4	88649840	88658491	+
4:9980592|9996941	0	0	0	2.74778	3.3625	1.95955	0	2.68994	2.68994	0.00513319	0.921644	exon	ENST00000506583,ENST00000309065,ENST00000513129,ENST00000264784,ENST00000505104	ENSG00000109667	SLC2A9	hsa_circ_0069190	4	9980592	9996941	-
5:123155884|123180323	2.08091	1.83985	2.36742	0	0	0	2.09606	0	-2.09606	0.0490863	0.921644	exon	ENST00000407847	ENSG00000061455	PRDM6	---	---	---	---	---
5:134741063|134744052	5.53077	6.19442	5.13396	4.8586	2.84602	3.6505	5.61972	3.78504	-1.83468	0.0136016	0.921644	exon	ENST00000297156	ENSG00000164615	CAMLG	hsa_circ_0003154	5	134741063	134744052	+
5:138198199|138202155	1.38702	3.1275	2.36742	0	0	0	2.29398	0	-2.29398	0.0150159	0.921644	exon	ENST00000394886	ENSG00000094880	CDC23	---	---	---	---	---
5:138372674|138379708	0	0	0	2.47857	2.03388	2.76104	0	2.4245	2.4245	0.0188198	0.921644	exon	ENST00000510866,ENST00000314358	ENSG00000120733	KDM3B	hsa_circ_0007640	5	138372674	138379708	+
5:139600372|139614966	4.83094	3.1275	3.9979	2.32244	3.74203	2.41525	3.98544	2.82657	-1.15887	0.0438343	0.921644	exon	ENST00000505007,ENST00000253815,ENST00000398734,ENST00000511725,ENST00000505548,ENST00000398733	ENSG00000131508	UBE2D2	hsa_circ_0005728	5	139600372	139614966	+
5:143054439|143121147	0	0	0	1.71665	4.2906	1.95955	0	2.6556	2.6556	0.00170541	0.921644	exon	ENST00000378004,ENST00000418236,ENST00000443674,ENST00000274498	ENSG00000145819	ARHGAP26	---	---	---	---	---
5:154865192|154872651	0	2.62281	2.36742	4.27007	4.04223	4.83033	1.66341	4.38088	2.71747	0.000710432	0.921644	exon	ENST00000524105,ENST00000521583,ENST00000285896,ENST00000403027,ENST00000520671,ENST00000519404,ENST00000517876,ENST00000518775	ENSG00000155508	CNOT8	hsa_circ_0074719	5	154865192	154872651	+
5:157359005|157361598	2.89947	3.1275	1.41363	0	0	0	2.4802	0	-2.4802	0.00679019	0.921644	exon	ENST00000521420,ENST00000618329,ENST00000522463,ENST00000616178,ENST00000435847,ENST00000620254	ENSG00000055163	CYFIP2	hsa_circ_0003506	5	157359005	157361598	+
5:157518823|157537991	0	0	0	1.44098	2.84602	2.41525	0	2.23408	2.23408	0.0336713	0.921644	exon	ENST00000257527,ENST00000517951,ENST00000517905	ENSG00000135074	ADAM19	---	---	---	---	---
5:168559032|168568998	0	0	1.80575	3.17049	3.3625	2.76104	0.601917	3.09801	2.49609	0.0415148	0.921644	exon	ENST00000239231	ENSG00000120137	PANK3	hsa_circ_0006386	5	168559032	168568998	-
5:168683966|168685927	0	0	0	2.61944	3.74203	1.95955	0	2.77368	2.77368	0.00266277	0.921644	exon	ENST00000332966,ENST00000519560,ENST00000518092,ENST00000404867	ENSG00000184347	SLIT3	hsa_circ_0074903	5	168683966	168685927	-
5:173108624|173123202	4.23029	2.62281	2.36742	1.44098	0	0	3.07351	0.480325	-2.59318	0.011114	0.921644	exon	ENST00000520464,ENST00000296953	ENSG00000164463	CREBRF	---	---	---	---	---
5:176154751|176159196	5.47946	3.79688	3.22039	2.61944	0	3.03976	4.16558	1.8864	-2.27917	0.0363618	0.921644	exon	ENST00000515403	ENSG00000248596	RP11-844P9.5	---	---	---	---	---
5:179823858|179825226	0	0	0.873449	1.44098	3.3625	3.27325	0.29115	2.69224	2.40109	0.0232776	0.921644	exon	ENST00000360718,ENST00000514093,ENST00000466342,ENST00000510187,ENST00000389805	ENSG00000161011	SQSTM1	---	---	---	---	---
5:31995576|32010482	3.4185	2.62281	3.83921	4.82989	5.13116	4.19665	3.29351	4.71923	1.42573	0.0187282	0.921644	exon	ENST00000438447,ENST00000502489	ENSG00000133401	PDZD2	---	---	---	---	---
5:32414969|32417792	3.1822	2.62281	3.34375	0.652309	0	1.28966	3.04959	0.647324	-2.40226	0.0127273	0.921644	exon	ENST00000505366,ENST00000265069	ENSG00000056097	ZFR	hsa_circ_0072099	5	32414969	32417792	-
5:40934325|40945368	2.54748	2.62281	1.80575	4.77069	4.68709	3.6505	2.32535	4.36942	2.04408	0.00103232	0.921644	exon	ENST00000313164	ENSG00000112936	C7	---	---	---	---	---
5:69306817|69314043	3.62148	1.83985	3.45739	0	2.03388	0	2.97291	0.677962	-2.29495	0.0405124	0.921644	exon	ENST00000396499,ENST00000383374,ENST00000396496,ENST00000511257	ENSG00000183323	CCDC125	---	---	---	---	---
5:73058433|73077493	4.23029	4.43549	3.75281	5.33793	5.36583	5.32219	4.13953	5.34198	1.20245	0.00564983	0.921644	exon	ENST00000430046,ENST00000512348	ENSG00000157107	FCHO2	hsa_circ_0003571	5	73058433	73077493	+
5:81094296|81109078	1.38702	0	0	3.63618	2.03388	2.41525	0.46234	2.6951	2.23276	0.0326981	0.921644	exon	ENST00000265080,ENST00000503795	ENSG00000113319	RASGRF2	---	---	---	---	---
5:87332507|87346724	0	0	0.873449	0.652309	4.2906	1.95955	0.29115	2.30082	2.00967	0.0254132	0.921644	exon	ENST00000456692,ENST00000506290,ENST00000274376,ENST00000512763,ENST00000515800	ENSG00000145715	RASA1	---	---	---	---	---
6:106583328|106602922	5.1261	2.62281	3.9979	2.97456	2.03388	1.95955	3.9156	2.32267	-1.59293	0.0125762	0.921644	exon	ENST00000369063	ENSG00000130347	RTN4IP1	hsa_circ_0008514	6	106583328	106602922	-
6:109419187|109436199	4.45943	4.25234	4.44632	3.07585	3.3625	3.27325	4.38603	3.2372	-1.14883	0.02562	0.921644	exon	ENST00000447468,ENST00000521072,ENST00000440797	ENSG00000185250	PPIL6	---	---	---	---	---
6:111177212|111177665	0	0	0	2.74778	2.03388	2.41525	0	2.39897	2.39897	0.020589	0.921644	exon	ENST00000439288,ENST00000368850,ENST00000368851,ENST00000465319,ENST00000419619,ENST00000612036	ENSG00000112394	SLC16A10	---	---	---	---	---
6:118826147|118829250	2.54748	1.83985	2.11375	0	0	0	2.16703	0	-2.16703	0.0368223	0.921644	exon	ENST00000316316,ENST00000619706,ENST00000458674	ENSG00000111877	MCM9	---	---	---	---	---
6:124935008|124948098	0	0	0	1.09988	2.84602	2.76104	0	2.23564	2.23564	0.0266954	0.921644	exon	ENST00000439075	ENSG00000236548	RNF217-AS1	---	---	---	---	---
6:126111219|126115855	3.1822	3.50067	4.07114	1.09988	2.03388	1.28966	3.58467	1.47447	-2.11019	0.00387513	0.921644	intergenic region	n/a	n/a	---	---	---	---	---	---
6:130175841|130184623	0	0	0	0.652309	3.3625	1.95955	0	1.99145	1.99145	0.037626	0.921644	exon	ENST00000532763,ENST00000437477,ENST00000368134,ENST00000439090,ENST00000457563,ENST00000526886	ENSG00000164483	SAMD3	---	---	---	---	---
6:135318519|135346796	0	1.83985	0.873449	1.44098	4.04223	3.03976	0.904434	2.84099	1.93656	0.036975	0.921644	exon_intron	ENST00000533029,ENST00000531788,ENST00000475846,ENST00000457866,ENST00000265602,ENST00000367799,ENST00000367800	ENSG00000135541	AHI1	---	---	---	---	---
6:138945219|138947913	2.08091	1.83985	2.36742	0	0	0	2.09606	0	-2.09606	0.0490863	0.921644	exon	ENST00000483468,ENST00000450536,ENST00000415951,ENST00000529597,ENST00000445570,ENST00000626459,ENST00000409812,ENST00000258062,ENST00000367663	ENSG00000135597	REPS1	---	---	---	---	---
6:158448996|158452268	0	0	0	3.34297	3.74203	1.28966	0	2.79155	2.79155	0.00144156	0.921644	exon	ENST00000367097,ENST00000616856,ENST00000367094	ENSG00000130338	TULP4	hsa_circ_0002073	6	158448996	158452268	+
6:163455279|163478896	4.65711	5.64429	5.80515	6.78387	6.55231	6.2503	5.36885	6.52882	1.15998	0.00336266	0.921644	exon	ENST00000453779,ENST00000424802,ENST00000361758,ENST00000275262,ENST00000361752,ENST00000545346,ENST00000392127,ENST00000544436,ENST00000544823,ENST00000537041,ENST00000361195	ENSG00000112531	QKI	hsa_circ_0005328	6	163455279	163478896	+
6:16485972|16753347	1.38702	4.25234	2.58309	4.35312	4.50242	4.59188	2.74082	4.48247	1.74166	0.0398639	0.921644	exon	ENST00000244769,ENST00000436367,ENST00000473388	ENSG00000124788	ATXN1	hsa_circ_0004625	6	16485972	16753347	-
6:22173998|22191656	3.62148	3.50067	1.41363	1.44098	0	0	2.84526	0.480325	-2.36494	0.0263792	0.921644	exon	ENST00000606197,ENST00000606851,ENST00000607048	ENSG00000272168	CASC15	---	---	---	---	---
6:35619096|35680422	2.08091	1.83985	1.80575	2.74778	4.04223	4.40776	1.90884	3.73259	1.82375	0.0113492	0.921644	exon_intron	ENST00000357266,ENST00000542713,ENST00000583739,ENST00000536438,ENST00000539068	ENSG00000096060,ENSG00000265527	FKBP5,MIR5690	---	---	---	---	---
6:37650109|37652340	3.4185	3.1275	3.75281	0	2.03388	0	3.43294	0.677962	-2.75497	0.00196275	0.921644	exon	ENST00000478143,ENST00000434837,ENST00000505425	ENSG00000112139	MDGA1	---	---	---	---	---
6:42650284|42652645	0	0	0	2.14734	3.74203	1.28966	0	2.39301	2.39301	0.00892589	0.921644	exon	ENST00000372901,ENST00000372899	ENSG00000024048	UBR2	hsa_circ_0076387	6	42650284	42652645	+
6:70475410|70502791	0	0	0	2.14734	2.84602	2.41525	0	2.46953	2.46953	0.017249	0.921644	exon	ENST00000361499,ENST00000194672,ENST00000393299,ENST00000418814,ENST00000370479,ENST00000505868,ENST00000505769,ENST00000515323	ENSG00000082269	FAM135A	hsa_circ_0076961	6	70475410	70502791	+
6:73479732|73480805	0	0	0	3.49701	2.84602	1.28966	0	2.54423	2.54423	0.00540511	0.921644	exon	ENST00000415954,ENST00000370300,ENST00000370308,ENST00000498286,ENST00000415228,ENST00000462039,ENST00000370305	ENSG00000135297	MTO1	hsa_circ_0076978	6	73479732	73480805	+
6:75621532|75647801	2.89947	2.62281	2.11375	0	0	0	2.54534	0	-2.54534	0.00787465	0.921644	exon	ENST00000370010,ENST00000447266,ENST00000327284,ENST00000483859	ENSG00000112701	SENP6	hsa_circ_0001612	6	75621532	75647801	+
6:80167678|80203212	2.89947	2.62281	2.77067	0	0	0	2.76432	0	-2.76432	0.00297908	0.921644	exon	ENST00000356489,ENST00000320393	ENSG00000083123	BCKDHB	hsa_circ_0077164	6	80167678	80203212	+
6:83934595|83936376	0	0	0	1.44098	3.3625	1.28966	0	2.03104	2.03104	0.038215	0.921644	exon	ENST00000479164,ENST00000369681	ENSG00000065615	CYB5R4	---	---	---	---	---
6:88844357|88853764	5.05778	4.25234	2.93665	2.74778	2.03388	3.47417	4.08225	2.75194	-1.33031	0.0366529	0.921644	exon	ENST00000538899,ENST00000627296,ENST00000369475,ENST00000369485	ENSG00000111880	RNGTT	hsa_circ_0077292	6	88844357	88853764	-
7:128574720|128592017	3.62148	3.50067	2.58309	1.71665	0	1.95955	3.23508	1.2254	-2.00968	0.0451196	0.921644	exon	ENST00000479267	ENSG00000280828	RP11-274B21.1	hsa_circ_0006771	7	128574720	128592017	+
7:130170400|130181719	2.89947	3.50067	2.11375	1.44098	0	0	2.83796	0.480325	-2.35764	0.0417269	0.921644	exon	ENST00000473456,ENST00000462753,ENST00000397622	ENSG00000146842	TMEM209	hsa_circ_0082341	7	130170400	130181719	-
7:139083780|139089759	3.1822	3.1275	3.08548	1.94801	0	0	3.13173	0.649335	-2.48239	0.0464618	0.921644	exon	ENST00000242351,ENST00000464606,ENST00000471652	ENSG00000105939	ZC3HAV1	hsa_circ_0082633	7	139083780	139089759	-
7:139237005|139266403	3.1822	3.1275	2.58309	1.09988	0	0	2.96426	0.366626	-2.59764	0.0171889	0.921644	exon	ENST00000473989	ENSG00000157741	UBN2	---	---	---	---	---
7:140041644|140058034	4.65711	4.25234	4.44632	1.71665	3.3625	2.41525	4.45192	2.49813	-1.95379	0.00102469	0.921644	exon	ENST00000473341,ENST00000263549	ENSG00000059378	PARP12	hsa_circ_0004684	7	140041644	140058034	-
7:140601403|140602542	3.62148	3.79688	3.56273	4.61111	4.50242	5.09712	3.66036	4.73688	1.07652	0.0287818	0.921644	exon	ENST00000496613,ENST00000275884,ENST00000537639,ENST00000492720	ENSG00000146966	DENND2A	hsa_circ_0002142	7	140601403	140602542	-
7:140702866|140704963	4.45943	2.62281	3.83921	2.47857	2.03388	0	3.64048	1.50415	-2.13633	0.0177385	0.921644	exon	ENST00000482954,ENST00000247866,ENST00000464566,ENST00000472695,ENST00000479181,ENST00000460088,ENST00000476279,ENST00000465506,ENST00000475276,ENST00000471136,ENST00000476470,ENST00000476181,ENST00000464564	ENSG00000090266	NDUFB2	hsa_circ_0007518	7	140702866	140704963	+
7:152330601|152358675	0	0	0	0.652309	2.84602	3.27325	0	2.25719	2.25719	0.015272	0.921644	exon	ENST00000452749,ENST00000558084,ENST00000262189,ENST00000355193	ENSG00000055609	KMT2C	hsa_circ_0001770	7	152330601	152358675	-
7:157220689|157231327	1.38702	1.83985	3.22039	3.87974	3.74203	4.19665	2.14909	3.93947	1.79039	0.0445914	0.921644	exon	ENST00000348165,ENST00000470408	ENSG00000009335	UBE3C	hsa_circ_0004755	7	157220689	157231327	+
7:158773341|158799072	4.10045	3.79688	3.34375	1.44098	0	1.28966	3.74703	0.910213	-2.83681	0.00109385	0.921644	exon	ENST00000613624,ENST00000275418,ENST00000251527	ENSG00000117868	ESYT2	hsa_circ_0083220	7	158773341	158799072	-
7:158901739|158906091	2.54748	3.79688	1.80575	1.09988	0	0	2.7167	0.366626	-2.35008	0.0251447	0.921644	exon	ENST00000407559,ENST00000444851,ENST00000467220	ENSG00000126870	WDR60	---	---	---	---	---
7:22976210|22984045	4.10045	4.59799	3.9979	3.34297	2.03388	2.41525	4.23211	2.59737	-1.63474	0.0219601	0.921644	exon	ENST00000409923,ENST00000440481,ENST00000432176	ENSG00000122591	FAM126A	hsa_circ_0001971	7	22976210	22984045	-
7:42148226|42148468	2.08091	1.83985	2.58309	0	0	0	2.16795	0	-2.16795	0.0357459	0.921644	exon	ENST00000479210,ENST00000395925,ENST00000448703	ENSG00000106571	GLI3	hsa_circ_0008537	7	42148226	42148468	-
7:5919849|5923962	1.38702	2.62281	3.22039	0	0	0	2.41007	0	-2.41007	0.00835194	0.921644	exon	ENST00000325974,ENST00000628813,ENST00000474507	ENSG00000122674	CCZ1	---	---	---	---	---
7:5986759|5992057	0	1.83985	0	2.86562	3.3625	2.76104	0.613285	2.99638	2.3831	0.0265041	0.921644	exon	ENST00000441476,ENST00000265849	ENSG00000122512	PMS2	hsa_circ_0008656	7	5986759	5992057	-
7:6111125|6115523	5.19134	5.40176	4.07114	4.18193	3.3625	3.6505	4.88808	3.73164	-1.15644	0.0249013	0.921644	exon	ENST00000306177,ENST00000479544,ENST00000404008,ENST00000521713	ENSG00000106346	USP42	hsa_circ_0007823	7	6111125	6115523	+
7:64336259|64336982	2.89947	1.83985	1.41363	0	0	0	2.05099	0	-2.05099	0.0403136	0.921644	exon	ENST00000488621,ENST00000355095,ENST00000423484	ENSG00000234444	ZNF736	hsa_circ_0008543	7	64336259	64336982	+
7:66771883|66775393	3.7994	3.1275	4.20733	4.22667	4.99777	5.60512	3.71141	4.94319	1.23178	0.025811	0.921644	exon	ENST00000380828,ENST00000437078,ENST00000439720,ENST00000450873,ENST00000607882,ENST00000284957,ENST00000484547,ENST00000503687	ENSG00000154710,ENSG00000243335	RABGEF1,KCTD7	hsa_circ_0006032	7	66771883	66775393	+
7:75199651|75202613	1.38702	2.62281	2.11375	0	0	0	2.04119	0	-2.04119	0.0495157	0.921644	exon	ENST00000622829,ENST00000616377,ENST00000614592	ENSG00000277053	GTF2IP1	hsa_circ_0005908	7	75199651	75202613	-
7:77083887|77098951	2.08091	4.04251	2.11375	4.74015	6.04431	4.75514	2.74572	5.17987	2.43415	0.00243709	0.921644	exon	ENST00000443595	ENSG00000214439	FAM185BP	hsa_circ_0003169	7	77083887	77098951	-
7:93252653|93276305	2.54748	2.62281	1.80575	0	0	0	2.32535	0	-2.32535	0.0195405	0.921644	exon	ENST00000305866,ENST00000544910,ENST00000251739	ENSG00000004766	VPS50	---	---	---	---	---
8:100062591|100080355	3.4185	1.83985	1.41363	0	0	0	2.22399	0	-2.22399	0.0137785	0.921644	exon	ENST00000360863,ENST00000617334,ENST00000523437,ENST00000523287,ENST00000519725	ENSG00000132554	RGS22	---	---	---	---	---
8:17675186|17723833	3.4185	3.1275	4.50035	1.44098	2.84602	2.41525	3.68212	2.23408	-1.44804	0.0258452	0.921644	exon	ENST00000520196,ENST00000262102	ENSG00000129422	MTUS1	hsa_circ_0083441	8	17675186	17723833	-
8:17743604|17755961	4.10045	3.1275	0.873449	0	0	0	2.70047	0	-2.70047	0.00328414	0.921644	exon	ENST00000519263,ENST00000262102,ENST00000381869,ENST00000523718	ENSG00000129422	MTUS1	hsa_circ_0083444	8	17743604	17755961	-
8:18799295|18804898	9.17011	9.31201	8.05756	8.09339	7.9028	6.98515	8.84656	7.66045	-1.18611	0.010394	0.921644	exon	ENST00000519851,ENST00000286485,ENST00000519653,ENST00000523619,ENST00000518315,ENST00000440756,ENST00000327040	ENSG00000156011	PSD3	hsa_circ_0004458	8	18799295	18804898	-
8:25298944|25310532	4.23029	3.50067	3.34375	1.71665	0	0	3.69157	0.572217	-3.11935	0.00197767	0.921644	exon	ENST00000276440,ENST00000444569	ENSG00000147459	DOCK5	hsa_circ_0005042	8	25298944	25310532	+
8:30069642|30070059	1.38702	3.79688	2.11375	0	0	0	2.43255	0	-2.43255	0.00423991	0.921644	exon	ENST00000521265,ENST00000518174,ENST00000520303,ENST00000522794,ENST00000545648,ENST00000518340,ENST00000256255	ENSG00000133872	SARAF	hsa_circ_0004283	8	30069642	30070059	-
8:30700081|30703240	0	0	0	0.652309	3.3625	2.41525	0	2.14335	2.14335	0.0238726	0.921644	exon	ENST00000521479,ENST00000537535,ENST00000541648,ENST00000546342,ENST00000221130	ENSG00000104687	GSR	hsa_circ_0083861	8	30700081	30703240	-
8:38429682|38429948	4.10045	4.04251	2.93665	5.81898	5.25326	5.21404	3.6932	5.42876	1.73556	0.000325859	0.921644	exon	ENST00000525001,ENST00000397113,ENST00000425967,ENST00000397091,ENST00000341462,ENST00000335922,ENST00000397090,ENST00000526570,ENST00000484370,ENST00000447712,ENST00000397108,ENST00000532791,ENST00000532386	ENSG00000077782	FGFR1	hsa_circ_0008016	8	38429682	38429948	-
8:43007847|43013400	2.89947	3.1275	3.56273	2.14734	0	0	3.19657	0.715779	-2.48079	0.0491318	0.921644	exon	ENST00000307602,ENST00000533539	ENSG00000168172	HOOK3	---	---	---	---	---
8:47396376|47407961	8.08949	6.9933	5.96742	6.10915	5.90222	5.87746	7.01674	5.96294	-1.05379	0.026253	0.921644	exon	ENST00000521918,ENST00000524141,ENST00000541342,ENST00000297423,ENST00000521214,ENST00000522117,ENST00000523814,ENST00000518074	ENSG00000164808	SPIDR	hsa_circ_0001798	8	47396376	47407961	+
8:47777686|47785317	0	0	0	1.44098	3.3625	1.28966	0	2.03104	2.03104	0.038215	0.921644	exon	ENST00000338368,ENST00000314191	ENSG00000253729	PRKDC	---	---	---	---	---
8:70594506|70598255	2.89947	1.83985	3.22039	0.652309	0	1.28966	2.65324	0.647324	-2.00591	0.0460355	0.921644	exon	ENST00000520700,ENST00000262213,ENST00000521425	ENSG00000067167	TRAM1	hsa_circ_0084756	8	70594506	70598255	-
8:86494829|86507112	1.38702	1.83985	0.873449	3.07585	4.04223	3.27325	1.36677	3.46378	2.09701	0.0105382	0.921644	exon	ENST00000523370,ENST00000522804	ENSG00000176623	RMDN1	hsa_circ_0002845	8	86494829	86507112	-
8:9706811|9710220	0	0	0	1.09988	3.3625	1.95955	0	2.14064	2.14064	0.0285447	0.921644	exon	ENST00000518281,ENST00000310430,ENST00000520408	ENSG00000173273	TNKS	---	---	---	---	---
8:97686668|97691188	5.76308	4.99805	4.20733	3.8226	3.3625	3.8076	4.98949	3.66423	-1.32526	0.00566733	0.921644	exon	ENST00000336273,ENST00000519934	ENSG00000147649	MTDH	hsa_circ_0002961	8	97686668	97691188	+
8:98749276|98774819	4.91058	4.25234	1.41363	1.09988	0	1.95955	3.52552	1.01981	-2.50571	0.00940391	0.921644	exon	ENST00000419617,ENST00000518165,ENST00000424861,ENST00000617590,ENST00000523601	ENSG00000104375	STK3	---	---	---	---	---
9:100016322|100022226	3.7994	3.1275	2.58309	0	0	0	3.17	0	-3.17	0.000211884	0.921644	exon	ENST00000262455	ENSG00000023318	ERP44	hsa_circ_0087750	9	100016322	100022226	-
9:111914605|111926496	2.89947	2.62281	0.873449	0	0	0	2.13191	0	-2.13191	0.0236381	0.921644	exon	ENST00000495085,ENST00000374279	ENSG00000148154	UGCG	---	---	---	---	---
9:114633768|114638726	2.08091	0	2.93665	2.97456	4.85078	4.83033	1.67252	4.21856	2.54604	0.018455	0.921644	exon	ENST00000374049,ENST00000288502	ENSG00000157693	TMEM268	hsa_circ_0088190	9	114633768	114638726	+
9:120536372|120539164	0	0	0	1.44098	3.3625	1.95955	0	2.25434	2.25434	0.0224417	0.921644	exon	ENST00000481266,ENST00000360822,ENST00000360190,ENST00000480112,ENST00000349780,ENST00000473282	ENSG00000136861	CDK5RAP2	---	---	---	---	---
9:122877471|122883379	3.4185	4.25234	3.92074	4.61111	5.65881	4.67582	3.86386	4.98191	1.11806	0.0263332	0.921644	exon	ENST00000335387,ENST00000373670,ENST00000357244,ENST00000423239,ENST00000498479	ENSG00000056586	RC3H2	hsa_circ_0088389	9	122877471	122883379	-
9:122890312|122897576	2.08091	1.83985	2.58309	0	0	0	2.16795	0	-2.16795	0.0357459	0.921644	exon	ENST00000335387,ENST00000373670,ENST00000357244,ENST00000423239,ENST00000498479	ENSG00000056586	RC3H2	hsa_circ_0088396	9	122890312	122897576	-
9:124799285|124801663	0	0	0.873449	1.09988	2.03388	3.8076	0.29115	2.31379	2.02264	0.0406853	0.921644	exon	ENST00000331715,ENST00000373580	ENSG00000185585	OLFML2A	---	---	---	---	---
9:124971370|124999990	0	1.83985	0	3.76309	2.84602	2.76104	0.613285	3.12338	2.5101	0.0119907	0.921644	exon	ENST00000373549,ENST00000477186,ENST00000336505	ENSG00000173611	SCAI	---	---	---	---	---
9:127344235|127345477	2.54748	2.62281	3.6609	0	0	1.28966	2.94373	0.429887	-2.51384	0.0109613	0.921644	exon	ENST00000373386,ENST00000373387,ENST00000460176,ENST00000435213	ENSG00000136895	GARNL3	hsa_circ_0088635	9	127344235	127345477	+
9:15777600|15784694	0	0	0	2.47857	2.84602	2.41525	0	2.57995	2.57995	0.0113441	0.921644	exon	ENST00000449575,ENST00000380701	ENSG00000164989	CCDC171	---	---	---	---	---
9:33068824|33073806	1.38702	4.43549	2.11375	0	0	1.28966	2.64542	0.429887	-2.21553	0.0279726	0.921644	exon	ENST00000397149	ENSG00000122692	SMU1	---	---	---	---	---
9:4823548|4849550	4.10045	4.43549	3.22039	1.71665	2.03388	1.28966	3.91878	1.68007	-2.23871	0.00126394	0.921644	exon	ENST00000381750,ENST00000442869	ENSG00000120158	RCL1	hsa_circ_0086258	9	4823548	4849550	+
9:4860125|4860901	6.20344	6.24436	5.54727	5.43644	4.04223	4.90179	5.99835	4.79349	-1.20487	0.00878556	0.921644	exon	ENST00000448872,ENST00000381750	ENSG00000120158	RCL1	hsa_circ_0007592	9	4860125	4860901	+
9:75932379|75986245	4.23029	3.1275	4.33177	1.94801	0	3.47417	3.89652	1.80739	-2.08913	0.0424111	0.921644	exon	ENST00000545128,ENST00000376752,ENST00000376767	ENSG00000099139	PCSK5	---	---	---	---	---
9:77214329|77227485	0	0	1.80575	2.47857	3.3625	3.27325	0.601917	3.03811	2.43619	0.0487147	0.921644	exon	ENST00000360280,ENST00000376634,ENST00000357409,ENST00000376636	ENSG00000197969	VPS13A	hsa_circ_0087243	9	77214329	77227485	+
9:96336717|96352109	3.62148	3.50067	2.11375	1.71665	0	1.28966	3.07863	1.0021	-2.07653	0.0387073	0.921644	exon	ENST00000253270	ENSG00000130958	SLC35D2	hsa_circ_0087616	9	96336717	96352109	-
9:96827080|96852005	0	0	0	2.14734	3.3625	1.28966	0	2.2665	2.2665	0.0204524	0.921644	exon	ENST00000478850,ENST00000535338,ENST00000481138,ENST00000466833	ENSG00000196597	ZNF782	---	---	---	---	---
9:99915178|99928843	1.38702	0	0.873449	2.97456	3.3625	3.03976	0.753489	3.12561	2.37212	0.0195424	0.921644	exon	ENST00000525342,ENST00000525640,ENST00000533696,ENST00000259400,ENST00000524405,ENST00000529340,ENST00000531035,ENST00000534052	ENSG00000136874	STX17	hsa_circ_0004825	9	99915178	99928843	+
X:105935170|105946464	0	1.83985	1.41363	2.14734	3.74203	3.27325	1.0845	3.05421	1.96971	0.0469773	0.921644	exon	ENST00000243300	ENSG00000123572	NRK	---	---	---	---	---
X:118766530|118776511	0	1.83985	1.41363	2.86562	2.03388	4.40776	1.0845	3.10242	2.01792	0.0183275	0.921644	exon	ENST00000371666	ENSG00000131724	IL13RA1	---	---	---	---	---
X:129032350|129122193	4.10045	2.62281	4.44632	2.86562	2.03388	2.41525	3.72319	2.43825	-1.28494	0.0448862	0.921644	exon_intron	ENST00000458202	ENSG00000234592	RP11-41L14.1	---	---	---	---	---
X:150727215|150737448	2.54748	1.83985	2.11375	0	0	0	2.16703	0	-2.16703	0.0368223	0.921644	exon	ENST00000370390,ENST00000485376,ENST00000445323,ENST00000488357	ENSG00000063601	MTMR1	hsa_circ_0091686	X	150727215	150737448	+
X:154764899|154767382	2.89947	2.62281	0.873449	0	0	0	2.13191	0	-2.13191	0.0236381	0.921644	exon	ENST00000369550,ENST00000620277,ENST00000413910	ENSG00000130826	DKC1	hsa_circ_0092136	X	154764899	154767382	+
X:16689450|16702941	0	0	0	1.09988	3.3625	2.41525	0	2.29254	2.29254	0.0177789	0.921644	exon	ENST00000443824,ENST00000380241,ENST00000359276	ENSG00000047230	CTPS2	---	---	---	---	---
X:53217143|53218398	2.08091	3.1275	3.6609	1.44098	0	0	2.95644	0.480325	-2.47611	0.0237159	0.921644	exon	ENST00000404049,ENST00000375379,ENST00000375401	ENSG00000126012	KDM5C	hsa_circ_0090618	X	53217143	53218398	-
X:6029280|6151771	0	0	0	1.09988	4.50242	3.6505	0	3.08426	3.08426	0.00180662	0.921644	exon	ENST00000381092,ENST00000381095,ENST00000275857,ENST00000381093	ENSG00000146938	NLGN4X	---	---	---	---	---
