# Supplementary material for: Identification and characterization of human ovary-derived circular RNAs and their potential roles in ovarian aging
Source: Aging (Albany NY). 2018 Sep 23;10(9):2511–34. doi: 10.18632/aging.101565 (PMC6188495; doi:10.18632/aging.101565)
Supplement: Supplementary Table S3 [file aging-10-101565-s004.xlsx]

## Sheet: 工作表1
GO ID	GO term	GO Category	Annotated	Significant	Symbol List	Expected	Classic Fisher Value	FDR
GO:0006996	organelle organization	Biological Process	3544	109	ABI1,AEBP2,AHI1,ARHGAP26,ASH1L,ASXL1,ATF2,ATG16L1,ATP2C1,ATXN3,BBS1,BCAS3,BRWD1,C2CD5,CCSER2,CDC23,CDC42BPA,CDK5RAP2,CEP192,CHD2,CHD6,CHEK2,CLASP1,CLUAP1,COX10,COX18,DCN,DHX9,DKC1,DPY30,ERCC6,FARP2,FCHO2,FCHSD2,GABPA,HAUS4,HOOK3,HP1BP3,ITGB5,KAT2B,KDM3B,KDM5B,KDM5C,KLC1,KMT2A,KMT2C,LRPPRC,LYST,MARK2,MCMBP,MEF2A,MTO1,NCKAP1,NCOA1,NDUFB2,NDUFV2,NUP133,NUP98,OBSL1,PANK2,PARP11,PDS5A,PDS5B,PEX5L,PHF2…	71.33	8.6e-07	0.00345462
GO:0044237	cellular metabolic process	Biological Process	10856	254	ABCA10,ABI1,ACACA,ACAP2,ADAL,ADGRD1,ADNP,AEBP2,AGAP1,AHI1,ALG9,ANKRD13C,APBB2,AQR,ARHGAP26,ASAP2,ASH1L,ASPHD1,ASXL1,ATF1,ATF2,ATG16L1,ATG7,ATP2C1,ATRIP,ATXN1,ATXN3,BCAS3,BCKDHB,BNIP2,BRWD1,CALCOCO1,CAMLG,CBLB,CCZ1,CDC23,CDC42BPA,CDK5RAP2,CELF2,CEP192,CHD2,CHD6,CHEK2,CLK1,CLNS1A,CNOT8,CNTN1,COX10,CPEB3,CPSF2,CREBRF,CRIM1,CTPS2,CYB5R4,CYFIP2,DCN,DCTD,DDX10,DENND2A,DENND4A,DENND5B,DGKH,DHX9,DKC1,DLA…	218.49	1.2e-05	0.024102
GO:0016043	cellular component organization	Biological Process	5696	151	ABI1,ABI3BP,ACACA,ADNP,AEBP2,AHI1,APBB2,ARHGAP26,ASH1L,ASXL1,ATF1,ATF2,ATG16L1,ATG7,ATP2C1,ATXN3,BBS1,BCAS3,BRWD1,C2CD5,CCSER2,CDC23,CDC42BPA,CDK5RAP2,CEP192,CHD2,CHD6,CHEK2,CLASP1,CLNS1A,CLUAP1,CNTN1,COX10,COX18,CPEB3,CRIM1,DCN,DGKH,DHX9,DKC1,DOCK5,DPY30,DSCAML1,ERCC6,FAF1,FAM126A,FARP2,FBN1,FCHO2,FCHSD2,FGFR1,GABPA,GLI3,GSPT1,GTF2F2,HAUS4,HOOK3,HP1BP3,ITGAL,ITGB5,KAT2B,KCTD7,KDM3B,KDM5B,KDM5C,K…	114.64	2e-05	0.02678
GO:0051276	chromosome organization	Biological Process	1116	43	AEBP2,ASH1L,ASXL1,ATF2,CDC23,CHD2,CHD6,CLASP1,DHX9,DKC1,DPY30,ERCC6,HP1BP3,KAT2B,KDM3B,KDM5B,KDM5C,KMT2A,KMT2C,MCMBP,NCOA1,NUP133,NUP98,PDS5A,PDS5B,PHF20,PIF1,PRDM6,PRKDC,PTGES3,RNF4,SAP130,SENP6,SETD2,SIRT3,SMC3,SPI1,STAG1,TDG,TDRD3,TNKS,UBR2,ZWILCH	22.46	3.1e-05	0.0311317
GO:0018205	peptidyl-lysine modification	Biological Process	398	21	ASH1L,ATF2,DPY30,KAT2B,KMT2A,KMT2C,NCOA1,NUP133,NUP98,PHF20,PRDM6,RNF4,SAP130,SENP6,SETD2,SIRT3,SMC3,SPI1,STAG1,TDG,UBA2	8.01	6e-05	0.044187
GO:0071840	cellular component organization or bioge...	Biological Process	5918	153	ABI1,ABI3BP,ACACA,ADNP,AEBP2,AHI1,APBB2,ARHGAP26,ASH1L,ASXL1,ATF1,ATF2,ATG16L1,ATG7,ATP2C1,ATXN3,BBS1,BCAS3,BRWD1,C2CD5,CCSER2,CDC23,CDC42BPA,CDK5RAP2,CEP192,CHD2,CHD6,CHEK2,CLASP1,CLNS1A,CLUAP1,CNTN1,COX10,COX18,CPEB3,CRIM1,DCN,DGKH,DHX9,DKC1,DOCK5,DPY30,DSCAML1,ERCC6,FAF1,FAM126A,FARP2,FBN1,FCHO2,FCHSD2,FGFR1,GABPA,GLI3,GSPT1,GTF2F2,HAUS4,HOOK3,HP1BP3,ITGAL,ITGB5,KAT2B,KCTD7,KDM3B,KDM5B,KDM5C,K…	119.11	7.1e-05	0.044187
GO:0006139	nucleobase-containing compound metabolic...	Biological Process	6655	168	ABCA10,ACACA,ACAP2,ADAL,ADGRD1,ADNP,AEBP2,AGAP1,AHI1,APBB2,AQR,ARHGAP26,ASAP2,ASH1L,ASXL1,ATF1,ATF2,ATP2C1,ATRIP,ATXN1,ATXN3,BCAS3,BNIP2,BRWD1,CALCOCO1,CCZ1,CDK5RAP2,CELF2,CHD2,CHD6,CHEK2,CLK1,CLNS1A,CNOT8,COX10,CPEB3,CPSF2,CREBRF,CTPS2,DCN,DCTD,DDX10,DENND2A,DENND4A,DENND5B,DHX9,DKC1,DOCK5,DPY30,ERCC6,FARP2,FBN1,FGFR1,FLI1,FOXK2,GABPA,GARNL3,GDI2,GLI3,GMPS,GPR161,GSPT1,GSR,GTF2A1L,GTF2F2,HNRNPM,…	133.94	8.4e-05	0.044187
GO:0018193	peptidyl-amino acid modification	Biological Process	1175	43	ABI1,ADNP,ASH1L,ASPHD1,ATF2,CBLB,CHEK2,CLK1,CNTN1,DCN,DPY30,ERCC6,FGFR1,FKBP5,KAT2B,KMT2A,KMT2C,LRP4,MARK2,MERTK,NCOA1,NUP133,NUP98,PDGFD,PHF20,PPIL6,PRDM6,PRKDC,RNF4,SAP130,SENP6,SETD2,SIRT3,SMC3,SPI1,ST3GAL3,ST6GAL2,STAG1,STT3A,TDG,TNKS,UBA2,ZMYM2	23.65	0.0001	0.044187
GO:0008152	metabolic process	Biological Process	11909	269	ABCA10,ABI1,ACACA,ACAP2,ADAL,ADAM19,ADGRD1,ADNP,AEBP2,AGAP1,AHI1,ALG9,ANKRD13C,APBB2,APPBP2,AQR,ARHGAP26,ASAP2,ASH1L,ASPHD1,ASXL1,ATF1,ATF2,ATG16L1,ATG7,ATP2C1,ATRIP,ATXN1,ATXN3,BCAS3,BCKDHB,BNIP2,BRWD1,C7,CALCOCO1,CAMLG,CAPN7,CBLB,CCZ1,CDC23,CDC42BPA,CDK5RAP2,CELF2,CEP192,CGNL1,CHD2,CHD6,CHEK2,CLK1,CLNS1A,CNOT8,CNTN1,COX10,CPEB3,CPSF2,CREBRF,CRIM1,CTPS2,CYB5R4,CYFIP2,DCN,DCTD,DDX10,DENND2A,DENND…	239.69	0.0001	0.044187
GO:0046483	heterocycle metabolic process	Biological Process	6835	171	ABCA10,ACACA,ACAP2,ADAL,ADGRD1,ADNP,AEBP2,AGAP1,AHI1,APBB2,AQR,ARHGAP26,ASAP2,ASH1L,ASXL1,ATF1,ATF2,ATP2C1,ATRIP,ATXN1,ATXN3,BCAS3,BNIP2,BRWD1,CALCOCO1,CCZ1,CDK5RAP2,CELF2,CHD2,CHD6,CHEK2,CLK1,CLNS1A,CNOT8,COX10,CPEB3,CPSF2,CREBRF,CTPS2,DCN,DCTD,DDX10,DENND2A,DENND4A,DENND5B,DHX9,DKC1,DOCK5,DPY30,ERCC6,FARP2,FBN1,FGFR1,FLI1,FOXK2,GABPA,GARNL3,GDI2,GLI3,GMPS,GPR161,GSPT1,GSR,GTF2A1L,GTF2F2,HNRNPM,…	137.56	0.00011	0.044187
GO:0019219	regulation of nucleobase-containing comp...	Biological Process	4558	122	ACAP2,ADGRD1,ADNP,AEBP2,AGAP1,AHI1,APBB2,ARHGAP26,ASAP2,ASH1L,ASXL1,ATF1,ATF2,ATXN1,ATXN3,BCAS3,BNIP2,BRWD1,CALCOCO1,CCZ1,CDK5RAP2,CHD2,CHD6,CHEK2,CLK1,CNOT8,CPEB3,CREBRF,DCN,DENND2A,DENND4A,DENND5B,DKC1,DOCK5,DPY30,ERCC6,FARP2,FBN1,FGFR1,FLI1,FOXK2,GABPA,GARNL3,GDI2,GLI3,GPR161,GTF2A1L,GTF2F2,HP1BP3,ITSN1,KAT2B,KDM3B,KDM5B,KDM5C,KMT2A,KMT2C,LRP4,LRPPRC,MAPK10,MED13,MEF2A,MNAT1,MTDH,NBAS,NCOA1,NF…	91.74	0.00016	0.0545164
GO:0043412	macromolecule modification	Biological Process	3978	109	ABI1,ADNP,AEBP2,ALG9,ASH1L,ASPHD1,ASXL1,ATF2,ATG7,ATXN3,CBLB,CDC23,CDC42BPA,CHD2,CHD6,CHEK2,CLK1,CNTN1,CRIM1,DCN,DKC1,DPY30,ERCC6,FAF1,FGFR1,FKBP5,FPGT-TNNI3K,GRK4,GSPT1,HECTD1,HERC3,HERC5,ICMT,KAT2B,KDM3B,KDM5B,KDM5C,KMT2A,KMT2C,LIMK2,LRP4,LTBP4,LTN1,MAN1A2,MAPK10,MARK2,MEF2A,MERTK,METTL15,MNAT1,MTMR1,MTO1,NCOA1,NRK,NUP133,NUP98,PDE5A,PDGFD,PHF20,PHKB,PIGN,PIK3CB,PMM2,PPIL6,PPM1H,PPP6R3,PRDM6,PR…	80.06	0.00018	0.0545164
GO:0006793	phosphorus metabolic process	Biological Process	4121	112	ABCA10,ABI1,ACACA,ACAP2,ADAL,ADGRD1,ADNP,AGAP1,ARHGAP26,ASAP2,ASH1L,ATP2C1,BCAS3,BNIP2,CBLB,CCZ1,CDC42BPA,CEP192,CHD2,CHD6,CHEK2,CLK1,CNTN1,COX10,CRIM1,CTPS2,DCN,DCTD,DDX10,DENND2A,DENND4A,DENND5B,DGKH,DHX9,DLAT,DOCK5,ERCC6,FAF1,FAM126A,FARP2,FGFR1,FPGT-TNNI3K,GARNL3,GDI2,GMPS,GPR161,GRK4,GSPT1,HERC5,ITSN1,KAT2B,LIMK2,LRP4,LTBP4,MAPK10,MARK2,MEF2A,MERTK,MNAT1,MTMR1,NDUFB2,NDUFV2,NRK,PANK2,PANK3,P…	82.94	0.00019	0.0545164
GO:1901135	carbohydrate derivative metabolic proces...	Biological Process	2544	76	ABCA10,ACACA,ACAP2,ADAL,ADGRD1,ADNP,AGAP1,ALG9,ARHGAP26,ASAP2,ATP2C1,BCAS3,BNIP2,CCZ1,CHD2,CHD6,COX10,CTPS2,DCN,DCTD,DDX10,DENND2A,DENND4A,DENND5B,DHX9,DOCK5,ERCC6,ERP44,FARP2,FGFR1,GARNL3,GDI2,GMPS,GPR161,GSPT1,ITSN1,KAT2B,MAN1A2,MNAT1,MTO1,NDUFB2,NDUFV2,PANK2,PANK3,PDE4B,PDE5A,PIF1,PIGN,PMM2,PMS2,PRKG1,PRPSAP2,PSD3,RABGEF1,RAPGEF4,RASA1,RASGRF2,RGS22,RHOT1,SERINC3,SIPA1L2,SIRT3,SLC35D2,SPAST,ST…	51.2	0.00019	0.0545164
GO:0009894	regulation of catabolic process	Biological Process	1295	45	ACAP2,AGAP1,ARHGAP26,ASAP2,ATG7,BCAS3,BNIP2,CCZ1,CDC23,CHEK2,CNOT8,CPEB3,DCN,DENND2A,DENND4A,DENND5B,DOCK5,FAF1,FARP2,FGFR1,GARNL3,GDI2,ITSN1,LRPPRC,MTDH,NBAS,PIK3CB,POLDIP2,PRKG1,PSD3,PSMD13,RABGEF1,RAPGEF4,RASA1,RASGRF2,RGS22,SERPINE2,SH3D19,SIPA1L2,SQSTM1,STXBP5L,TBC1D22A,TMEM59,TNRC6C,ZC3HAV1	26.06	0.00022	0.0549695
GO:0006725	cellular aromatic compound metabolic pro...	Biological Process	6863	170	ABCA10,ACACA,ACAP2,ADAL,ADGRD1,ADNP,AEBP2,AGAP1,AHI1,APBB2,AQR,ARHGAP26,ASAP2,ASH1L,ASXL1,ATF1,ATF2,ATP2C1,ATRIP,ATXN1,ATXN3,BCAS3,BNIP2,BRWD1,CALCOCO1,CCZ1,CDK5RAP2,CELF2,CHD2,CHD6,CHEK2,CLK1,CLNS1A,CNOT8,COX10,CPEB3,CPSF2,CREBRF,CTPS2,DCN,DCTD,DDX10,DENND2A,DENND4A,DENND5B,DHX9,DKC1,DOCK5,DPY30,ERCC6,FARP2,FBN1,FGFR1,FLI1,FOXK2,GABPA,GARNL3,GDI2,GLI3,GMPS,GPR161,GSPT1,GSR,GTF2A1L,GTF2F2,HNRNPM,…	138.13	0.00023	0.0549695
GO:0051171	regulation of nitrogen compound metaboli...	Biological Process	4834	127	ACAP2,ADGRD1,ADNP,AEBP2,AGAP1,AHI1,APBB2,ARHGAP26,ASAP2,ASH1L,ASXL1,ATF1,ATF2,ATXN1,ATXN3,BCAS3,BNIP2,BRWD1,CALCOCO1,CCZ1,CDK5RAP2,CHD2,CHD6,CHEK2,CLK1,CNOT8,CPEB3,CREBRF,DCN,DENND2A,DENND4A,DENND5B,DKC1,DOCK5,DPY30,ERCC6,FARP2,FBN1,FGFR1,FLI1,FOXK2,GABPA,GARNL3,GDI2,GIGYF2,GLI3,GPR161,GTF2A1L,GTF2F2,HP1BP3,ITSN1,KAT2B,KDM3B,KDM5B,KDM5C,KMT2A,KMT2C,LRP4,LRPPRC,MAPK10,MED13,MEF2A,MNAT1,MTDH,NBAS,N…	97.29	0.00025	0.0549695
GO:0061013	regulation of mRNA catabolic process	Biological Process	29	5	CNOT8,CPEB3,NBAS,TNRC6C,ZC3HAV1	0.58	0.00026	0.0549695
GO:0006796	phosphate-containing compound metabolic ...	Biological Process	4061	110	ABCA10,ABI1,ACACA,ACAP2,ADAL,ADGRD1,ADNP,AGAP1,ARHGAP26,ASAP2,ASH1L,ATP2C1,BCAS3,BNIP2,CBLB,CCZ1,CDC42BPA,CEP192,CHD2,CHD6,CHEK2,CLK1,CNTN1,COX10,CRIM1,CTPS2,DCN,DCTD,DDX10,DENND2A,DENND4A,DENND5B,DGKH,DHX9,DOCK5,ERCC6,FAF1,FAM126A,FARP2,FGFR1,FPGT-TNNI3K,GARNL3,GDI2,GMPS,GPR161,GRK4,GSPT1,HERC5,ITSN1,KAT2B,LIMK2,LRP4,LTBP4,MAPK10,MARK2,MEF2A,MERTK,MNAT1,MTMR1,NDUFB2,NDUFV2,NRK,PANK2,PANK3,PDE4B,…	81.73	0.00026	0.0549695
GO:0034641	cellular nitrogen compound metabolic pro...	Biological Process	7364	179	ABCA10,ACACA,ACAP2,ADAL,ADGRD1,ADNP,AEBP2,AGAP1,AHI1,APBB2,AQR,ARHGAP26,ASAP2,ASH1L,ASXL1,ATF1,ATF2,ATP2C1,ATRIP,ATXN1,ATXN3,BCAS3,BNIP2,BRWD1,CALCOCO1,CCZ1,CDK5RAP2,CELF2,CHD2,CHD6,CHEK2,CLK1,CLNS1A,CNOT8,COX10,CPEB3,CPSF2,CREBRF,CTPS2,DCN,DCTD,DDX10,DENND2A,DENND4A,DENND5B,DHX9,DKC1,DOCK5,DPY30,ERCC6,FARP2,FBN1,FGFR1,FLI1,FOXK2,GABPA,GARNL3,GDI2,GIGYF2,GLI3,GMPS,GPR161,GSPT1,GSR,GTF2A1L,GTF2F2,…	148.21	0.00037	0.0734141
GO:0031329	regulation of cellular catabolic process	Biological Process	1213	42	ACAP2,AGAP1,ARHGAP26,ASAP2,ATG7,BCAS3,BNIP2,CCZ1,CDC23,CNOT8,CPEB3,DCN,DENND2A,DENND4A,DENND5B,DOCK5,FARP2,FGFR1,GARNL3,GDI2,ITSN1,LRPPRC,MTDH,NBAS,PIK3CB,POLDIP2,PRKG1,PSD3,PSMD13,RABGEF1,RAPGEF4,RASA1,RASGRF2,RGS22,SH3D19,SIPA1L2,SQSTM1,STXBP5L,TBC1D22A,TMEM59,TNRC6C,ZC3HAV1	24.41	0.00039	0.0734141
GO:0043547	positive regulation of GTPase activity	Biological Process	599	25	ACAP2,AGAP1,ARHGAP26,ASAP2,BCAS3,BNIP2,CCZ1,DENND2A,DENND4A,DENND5B,DOCK5,FARP2,FGFR1,GARNL3,GDI2,ITSN1,PSD3,RABGEF1,RAPGEF4,RASA1,RASGRF2,RGS22,SIPA1L2,STXBP5L,TBC1D22A	12.06	0.00049	0.0734141
GO:0055086	nucleobase-containing small molecule met...	Biological Process	2031	62	ABCA10,ACACA,ACAP2,ADAL,ADGRD1,ADNP,AGAP1,ARHGAP26,ASAP2,ATP2C1,BCAS3,BNIP2,CCZ1,CHD2,CHD6,COX10,CTPS2,DCTD,DDX10,DENND2A,DENND4A,DENND5B,DHX9,DOCK5,ERCC6,FARP2,FGFR1,GARNL3,GDI2,GMPS,GPR161,GSPT1,GSR,ITSN1,MNAT1,MTO1,NDUFB2,NDUFV2,PANK2,PANK3,PDE4B,PDE5A,PIF1,PMM2,PMS2,PRKG1,PRPSAP2,PSD3,RABGEF1,RAPGEF4,RASA1,RASGRF2,RGS22,RHOT1,SIPA1L2,SPAST,STXBP5L,TBC1D22A,TDG,UNG,VWA8,YME1L1	40.88	0.00049	0.0734141
GO:0016569	covalent chromatin modification	Biological Process	532	23	AEBP2,ASH1L,ASXL1,ATF2,CHD2,CHD6,DPY30,KAT2B,KDM3B,KDM5B,KDM5C,KMT2A,KMT2C,NCOA1,PHF20,PRDM6,SAP130,SETD2,SIRT3,SPI1,TDG,TDRD3,UBR2	10.71	0.0005	0.0734141
GO:1901360	organic cyclic compound metabolic proces...	Biological Process	7061	172	ABCA10,ACACA,ACAP2,ADAL,ADGRD1,ADNP,AEBP2,AGAP1,AHI1,APBB2,AQR,ARHGAP26,ASAP2,ASH1L,ASXL1,ATF1,ATF2,ATP2C1,ATRIP,ATXN1,ATXN3,BCAS3,BNIP2,BRWD1,CALCOCO1,CCZ1,CDK5RAP2,CELF2,CHD2,CHD6,CHEK2,CLK1,CLNS1A,CNOT8,COX10,CPEB3,CPSF2,CREBRF,CTPS2,DCN,DCTD,DDX10,DENND2A,DENND4A,DENND5B,DHX9,DKC1,DOCK5,DPY30,ERCC6,FARP2,FBN1,FGFR1,FLI1,FOXK2,GABPA,GARNL3,GDI2,GLI3,GMPS,GPR161,GSPT1,GSR,GTF2A1L,GTF2F2,HNRNPM,…	142.11	0.00052	0.0734141
GO:0006464	cellular protein modification process	Biological Process	3728	101	ABI1,ADNP,ALG9,ASH1L,ASPHD1,ASXL1,ATF2,ATG7,ATXN3,CBLB,CDC23,CDC42BPA,CHEK2,CLK1,CNTN1,CRIM1,DCN,DPY30,ERCC6,FAF1,FGFR1,FKBP5,FPGT-TNNI3K,GRK4,GSPT1,HECTD1,HERC3,HERC5,ICMT,KAT2B,KDM3B,KDM5B,KDM5C,KMT2A,KMT2C,LIMK2,LRP4,LTBP4,LTN1,MAN1A2,MAPK10,MARK2,MEF2A,MERTK,MNAT1,MTMR1,NCOA1,NRK,NUP133,NUP98,PDE5A,PDGFD,PHF20,PHKB,PIGN,PIK3CB,PMM2,PPIL6,PPM1H,PPP6R3,PRDM6,PRKACB,PRKDC,PRKG1,PSMD13,PTPN13,PTP…	75.03	0.00053	0.0734141
GO:0036211	protein modification process	Biological Process	3728	101	ABI1,ADNP,ALG9,ASH1L,ASPHD1,ASXL1,ATF2,ATG7,ATXN3,CBLB,CDC23,CDC42BPA,CHEK2,CLK1,CNTN1,CRIM1,DCN,DPY30,ERCC6,FAF1,FGFR1,FKBP5,FPGT-TNNI3K,GRK4,GSPT1,HECTD1,HERC3,HERC5,ICMT,KAT2B,KDM3B,KDM5B,KDM5C,KMT2A,KMT2C,LIMK2,LRP4,LTBP4,LTN1,MAN1A2,MAPK10,MARK2,MEF2A,MERTK,MNAT1,MTMR1,NCOA1,NRK,NUP133,NUP98,PDE5A,PDGFD,PHF20,PHKB,PIGN,PIK3CB,PMM2,PPIL6,PPM1H,PPP6R3,PRDM6,PRKACB,PRKDC,PRKG1,PSMD13,PTPN13,PTP…	75.03	0.00053	0.0734141
GO:0009117	nucleotide metabolic process	Biological Process	1954	60	ABCA10,ACACA,ACAP2,ADAL,ADGRD1,ADNP,AGAP1,ARHGAP26,ASAP2,ATP2C1,BCAS3,BNIP2,CCZ1,CHD2,CHD6,COX10,CTPS2,DCTD,DDX10,DENND2A,DENND4A,DENND5B,DHX9,DOCK5,ERCC6,FARP2,FGFR1,GARNL3,GDI2,GMPS,GPR161,GSPT1,ITSN1,MNAT1,NDUFB2,NDUFV2,PANK2,PANK3,PDE4B,PDE5A,PIF1,PMM2,PMS2,PRKG1,PRPSAP2,PSD3,RABGEF1,RAPGEF4,RASA1,RASGRF2,RGS22,RHOT1,SIPA1L2,SPAST,STXBP5L,TBC1D22A,TDG,UNG,VWA8,YME1L1	39.33	0.00053	0.0734141
GO:0071704	organic substance metabolic process	Biological Process	11214	253	ABCA10,ABI1,ACACA,ACAP2,ADAL,ADAM19,ADGRD1,ADNP,AEBP2,AGAP1,AHI1,ALG9,ANKRD13C,APBB2,AQR,ARHGAP26,ASAP2,ASH1L,ASPHD1,ASXL1,ATF1,ATF2,ATG7,ATP2C1,ATRIP,ATXN1,ATXN3,BCAS3,BCKDHB,BNIP2,BRWD1,C7,CALCOCO1,CAMLG,CAPN7,CBLB,CCZ1,CDC23,CDC42BPA,CDK5RAP2,CELF2,CHD2,CHD6,CHEK2,CLK1,CLNS1A,CNOT8,CNTN1,COX10,CPEB3,CPSF2,CREBRF,CRIM1,CTPS2,CYFIP2,DCN,DCTD,DDX10,DENND2A,DENND4A,DENND5B,DHX9,DKC1,DLAT,DOCK5,DPP…	225.7	0.00053	0.0734141
GO:0006753	nucleoside phosphate metabolic process	Biological Process	1962	60	ABCA10,ACACA,ACAP2,ADAL,ADGRD1,ADNP,AGAP1,ARHGAP26,ASAP2,ATP2C1,BCAS3,BNIP2,CCZ1,CHD2,CHD6,COX10,CTPS2,DCTD,DDX10,DENND2A,DENND4A,DENND5B,DHX9,DOCK5,ERCC6,FARP2,FGFR1,GARNL3,GDI2,GMPS,GPR161,GSPT1,ITSN1,MNAT1,NDUFB2,NDUFV2,PANK2,PANK3,PDE4B,PDE5A,PIF1,PMM2,PMS2,PRKG1,PRPSAP2,PSD3,RABGEF1,RAPGEF4,RASA1,RASGRF2,RGS22,RHOT1,SIPA1L2,SPAST,STXBP5L,TBC1D22A,TDG,UNG,VWA8,YME1L1	39.49	0.00059	0.079001
GO:0080090	regulation of primary metabolic process	Biological Process	6065	151	ABI1,ACAP2,ADGRD1,ADNP,AEBP2,AGAP1,AHI1,APBB2,ARHGAP26,ASAP2,ASH1L,ASXL1,ATF1,ATF2,ATG7,ATXN1,ATXN3,BCAS3,BNIP2,BRWD1,C7,CALCOCO1,CBLB,CCZ1,CDC23,CDK5RAP2,CHD2,CHD6,CHEK2,CLK1,CNOT8,CNTN1,CPEB3,CREBRF,CRIM1,CYFIP2,DCN,DENND2A,DENND4A,DENND5B,DKC1,DLAT,DOCK5,DPY30,ERCC6,FAF1,FARP2,FBN1,FGFR1,FLI1,FOXK2,GABPA,GARNL3,GDI2,GIGYF2,GLI3,GPR161,GTF2A1L,GTF2F2,HERC5,HP1BP3,ITSN1,KAT2B,KDM3B,KDM5B,KDM5C,K…	122.07	0.00061	0.0790442
GO:0051646	mitochondrion localization	Biological Process	36	5	LRPPRC,MARK2,MEF2A,RHOT1,SPAST	0.72	0.00072	0.0887968
GO:0006901	vesicle coating	Biological Process	75	7	FCHO2,PICALM,PPP6R3,SCFD1,SEC24B,TFG,USO1	1.51	0.00077	0.0887968
GO:0043087	regulation of GTPase activity	Biological Process	654	26	ACAP2,AGAP1,ARHGAP26,ASAP2,BCAS3,BNIP2,CCZ1,DENND2A,DENND4A,DENND5B,DOCK5,FARP2,FGFR1,GARNL3,GDI2,ITSN1,PRKG1,PSD3,RABGEF1,RAPGEF4,RASA1,RASGRF2,RGS22,SIPA1L2,STXBP5L,TBC1D22A	13.16	0.00078	0.0887968
GO:0031323	regulation of cellular metabolic process	Biological Process	6192	153	ABI1,ACACA,ACAP2,ADGRD1,ADNP,AEBP2,AGAP1,AHI1,ANKRD13C,APBB2,ARHGAP26,ASAP2,ASH1L,ASXL1,ATF1,ATF2,ATG7,ATXN1,ATXN3,BCAS3,BNIP2,BRWD1,CALCOCO1,CBLB,CCZ1,CDC23,CDK5RAP2,CEP192,CHD2,CHD6,CHEK2,CLK1,CNOT8,CNTN1,CPEB3,CREBRF,CRIM1,CYFIP2,DCN,DENND2A,DENND4A,DENND5B,DKC1,DLAT,DOCK5,DPY30,ERCC6,FAF1,FARP2,FBN1,FGFR1,FLI1,FOXK2,GABPA,GARNL3,GDI2,GIGYF2,GLI3,GPR161,GTF2A1L,GTF2F2,HERC5,HP1BP3,ITSN1,KAT2B,…	124.62	0.00079	0.0887968
GO:0007062	sister chromatid cohesion	Biological Process	122	9	CLASP1,MCMBP,NUP133,NUP98,PDS5A,PDS5B,SMC3,STAG1,ZWILCH	2.46	0.00081	0.0887968
GO:0009116	nucleoside metabolic process	Biological Process	1577	50	ABCA10,ACACA,ACAP2,ADAL,AGAP1,ARHGAP26,ASAP2,ATP2C1,BCAS3,BNIP2,CCZ1,CHD2,CHD6,CTPS2,DCTD,DDX10,DENND2A,DENND4A,DENND5B,DHX9,DOCK5,ERCC6,FARP2,FGFR1,GARNL3,GDI2,GMPS,GSPT1,ITSN1,MNAT1,MTO1,PANK2,PANK3,PIF1,PMS2,PRKG1,PRPSAP2,PSD3,RABGEF1,RAPGEF4,RASA1,RASGRF2,RGS22,RHOT1,SIPA1L2,SPAST,STXBP5L,TBC1D22A,VWA8,YME1L1	31.74	0.00082	0.0887968
GO:0044238	primary metabolic process	Biological Process	10894	246	ABCA10,ABI1,ACACA,ACAP2,ADAL,ADAM19,ADGRD1,ADNP,AEBP2,AGAP1,AHI1,ALG9,APBB2,AQR,ARHGAP26,ASAP2,ASH1L,ASPHD1,ASXL1,ATF1,ATF2,ATG7,ATP2C1,ATRIP,ATXN1,ATXN3,BCAS3,BCKDHB,BNIP2,BRWD1,C7,CALCOCO1,CAPN7,CBLB,CCZ1,CDC23,CDC42BPA,CDK5RAP2,CELF2,CHD2,CHD6,CHEK2,CLK1,CLNS1A,CNOT8,CNTN1,COX10,CPEB3,CPSF2,CREBRF,CRIM1,CTPS2,CYFIP2,DCN,DCTD,DDX10,DENND2A,DENND4A,DENND5B,DHX9,DKC1,DLAT,DOCK5,DPP8,DPY30,ERCC6,E…	219.26	0.00084	0.0887968
GO:0019222	regulation of metabolic process	Biological Process	6789	165	ABI1,ACACA,ACAP2,ADGRD1,ADNP,AEBP2,AGAP1,AHI1,ANKRD13C,APBB2,ARHGAP26,ASAP2,ASH1L,ASXL1,ATF1,ATF2,ATG7,ATXN1,ATXN3,BCAS3,BNIP2,BRWD1,C7,CALCOCO1,CBLB,CCZ1,CDC23,CDK5RAP2,CEP192,CHD2,CHD6,CHEK2,CLK1,CNOT8,CNTN1,CPEB3,CREBRF,CRIM1,CYFIP2,DCN,DENND2A,DENND4A,DENND5B,DHX9,DKC1,DLAT,DOCK5,DPY30,ERCC6,FAF1,FARP2,FBN1,FGFR1,FLI1,FOXK2,GABPA,GARNL3,GDI2,GIGYF2,GLI3,GPR161,GSPT1,GTF2A1L,GTF2F2,HERC5,HP1BP…	136.64	0.0009	0.0927
GO:1901657	glycosyl compound metabolic process	Biological Process	1595	50	ABCA10,ACACA,ACAP2,ADAL,AGAP1,ARHGAP26,ASAP2,ATP2C1,BCAS3,BNIP2,CCZ1,CHD2,CHD6,CTPS2,DCTD,DDX10,DENND2A,DENND4A,DENND5B,DHX9,DOCK5,ERCC6,FARP2,FGFR1,GARNL3,GDI2,GMPS,GSPT1,ITSN1,MNAT1,MTO1,PANK2,PANK3,PIF1,PMS2,PRKG1,PRPSAP2,PSD3,RABGEF1,RAPGEF4,RASA1,RASGRF2,RGS22,RHOT1,SIPA1L2,SPAST,STXBP5L,TBC1D22A,VWA8,YME1L1	32.1	0.00105	0.105446
GO:0019637	organophosphate metabolic process	Biological Process	2352	68	ABCA10,ACACA,ACAP2,ADAL,ADGRD1,ADNP,AGAP1,ARHGAP26,ASAP2,ATP2C1,BCAS3,BNIP2,CCZ1,CHD2,CHD6,COX10,CTPS2,DCTD,DDX10,DENND2A,DENND4A,DENND5B,DHX9,DOCK5,ERCC6,FAM126A,FARP2,FGFR1,GARNL3,GDI2,GMPS,GPR161,GSPT1,ITSN1,MNAT1,MTMR1,NDUFB2,NDUFV2,PANK2,PANK3,PDE4B,PDE5A,PGS1,PIF1,PIGN,PIK3CB,PMM2,PMS2,PRKG1,PRPSAP2,PSD3,RABGEF1,RAPGEF4,RASA1,RASGRF2,RGS22,RHOT1,SERINC3,SIPA1L2,SLC44A2,SPAST,STXBP5L,TBC1D22…	47.34	0.00111	0.108753
GO:0090234	regulation of kinetochore assembly	Biological Process	3	2	RNF4,SENP6	0.06	0.0012	0.112102
GO:2001038	regulation of cellular response to drug	Biological Process	3	2	KMT2A,NCOA1	0.06	0.0012	0.112102
GO:0006807	nitrogen compound metabolic process	Biological Process	7726	183	ABCA10,ACACA,ACAP2,ADAL,ADGRD1,ADNP,AEBP2,AGAP1,AHI1,APBB2,AQR,ARHGAP26,ASAP2,ASH1L,ASXL1,ATF1,ATF2,ATP2C1,ATRIP,ATXN1,ATXN3,BCAS3,BCKDHB,BNIP2,BRWD1,CALCOCO1,CCZ1,CDK5RAP2,CELF2,CHD2,CHD6,CHEK2,CLK1,CLNS1A,CNOT8,COX10,CPEB3,CPSF2,CREBRF,CTPS2,DCN,DCTD,DDX10,DENND2A,DENND4A,DENND5B,DHX9,DKC1,DOCK5,DPY30,ERCC6,FARP2,FBN1,FGFR1,FLI1,FOXK2,GABPA,GARNL3,GDI2,GIGYF2,GLI3,GMPS,GPR161,GSPT1,GSR,GTF2A1L,…	155.5	0.00134	0.122336
GO:0006471	protein ADP-ribosylation	Biological Process	25	4	ADNP,KAT2B,SIRT3,TNKS	0.5	0.00146	0.126493
GO:0045879	negative regulation of smoothened signal...	Biological Process	25	4	GLI3,GPR161,PRKACB,SERPINE2	0.5	0.00146	0.126493
GO:0072521	purine-containing compound metabolic pro...	Biological Process	1869	56	ABCA10,ACACA,ACAP2,ADAL,ADGRD1,ADNP,AGAP1,ARHGAP26,ASAP2,ATP2C1,BCAS3,BNIP2,CCZ1,CHD2,CHD6,COX10,DDX10,DENND2A,DENND4A,DENND5B,DHX9,DOCK5,ERCC6,FARP2,FGFR1,GARNL3,GDI2,GMPS,GPR161,GSPT1,ITSN1,MNAT1,MTO1,NDUFB2,NDUFV2,PANK2,PANK3,PDE4B,PDE5A,PIF1,PMS2,PRKG1,PSD3,RABGEF1,RAPGEF4,RASA1,RASGRF2,RGS22,RHOT1,SIPA1L2,SLC2A9,SPAST,STXBP5L,TBC1D22A,VWA8,YME1L1	37.62	0.00148	0.126493
GO:0015937	coenzyme A biosynthetic process	Biological Process	12	3	ACACA,PANK2,PANK3	0.24	0.00155	0.129716
GO:0061014	positive regulation of mRNA catabolic pr...	Biological Process	26	4	CNOT8,CPEB3,TNRC6C,ZC3HAV1	0.52	0.0017	0.136578
GO:0090075	relaxation of muscle	Biological Process	26	4	PDE4B,PDE5A,PRKG1,SLC8A1	0.52	0.0017	0.136578
GO:0009119	ribonucleoside metabolic process	Biological Process	1553	48	ABCA10,ACACA,ACAP2,ADAL,AGAP1,ARHGAP26,ASAP2,ATP2C1,BCAS3,BNIP2,CCZ1,CHD2,CHD6,CTPS2,DDX10,DENND2A,DENND4A,DENND5B,DHX9,DOCK5,ERCC6,FARP2,FGFR1,GARNL3,GDI2,GMPS,GSPT1,ITSN1,MNAT1,MTO1,PANK2,PANK3,PIF1,PMS2,PRKG1,PSD3,RABGEF1,RAPGEF4,RASA1,RASGRF2,RGS22,RHOT1,SIPA1L2,SPAST,STXBP5L,TBC1D22A,VWA8,YME1L1	31.26	0.00179	0.138277
GO:0009166	nucleotide catabolic process	Biological Process	1431	45	ABCA10,ACAP2,AGAP1,ARHGAP26,ASAP2,ATP2C1,BCAS3,BNIP2,CCZ1,CHD2,CHD6,DDX10,DENND2A,DENND4A,DENND5B,DHX9,DOCK5,ERCC6,FARP2,FGFR1,GARNL3,GDI2,GSPT1,ITSN1,MNAT1,PDE4B,PDE5A,PIF1,PMS2,PRKG1,PSD3,RABGEF1,RAPGEF4,RASA1,RASGRF2,RGS22,RHOT1,SIPA1L2,SPAST,STXBP5L,TBC1D22A,TDG,UNG,VWA8,YME1L1	28.8	0.00179	0.138277
GO:1902589	single-organism organelle organization	Biological Process	1434	45	ABI1,AHI1,ARHGAP26,ATP2C1,ATXN3,BBS1,BCAS3,C2CD5,CDC23,CDC42BPA,CLASP1,CLUAP1,COX18,FARP2,FCHSD2,HOOK3,ITGB5,KLC1,MARK2,MCMBP,MEF2A,NCKAP1,NUP133,NUP98,OBSL1,PANK2,PDS5A,PDS5B,PEX5L,PICALM,PLEKHH2,POLDIP2,PRKG1,RASA1,RFX2,RHOT1,SCLT1,SMC3,SPAST,SQSTM1,STAG1,STX17,TBC1D22A,USO1,ZWILCH	28.86	0.00187	0.140947
GO:0034655	nucleobase-containing compound catabolic...	Biological Process	1725	52	ABCA10,ACAP2,ADAL,AGAP1,ARHGAP26,ASAP2,ATP2C1,BCAS3,BNIP2,CCZ1,CHD2,CHD6,CNOT8,CPEB3,DDX10,DENND2A,DENND4A,DENND5B,DHX9,DOCK5,ERCC6,FARP2,FGFR1,GARNL3,GDI2,GSPT1,ITSN1,LRPPRC,MNAT1,NBAS,PDE4B,PDE5A,PIF1,PMS2,PRKG1,PSD3,RABGEF1,RAPGEF4,RASA1,RASGRF2,RGS22,RHOT1,SIPA1L2,SPAST,STXBP5L,TBC1D22A,TDG,TNRC6C,UNG,VWA8,YME1L1,ZC3HAV1	34.72	0.00195	0.140947
GO:0060831	smoothened signaling pathway involved in...	Biological Process	13	3	GLI3,GPR161,PRKACB	0.26	0.00199	0.140947
GO:0009259	ribonucleotide metabolic process	Biological Process	1810	54	ABCA10,ACACA,ACAP2,ADGRD1,ADNP,AGAP1,ARHGAP26,ASAP2,ATP2C1,BCAS3,BNIP2,CCZ1,CHD2,CHD6,COX10,CTPS2,DDX10,DENND2A,DENND4A,DENND5B,DHX9,DOCK5,ERCC6,FARP2,FGFR1,GARNL3,GDI2,GMPS,GPR161,GSPT1,ITSN1,MNAT1,NDUFB2,NDUFV2,PANK2,PANK3,PDE4B,PDE5A,PIF1,PMS2,PRKG1,PSD3,RABGEF1,RAPGEF4,RASA1,RASGRF2,RGS22,RHOT1,SIPA1L2,SPAST,STXBP5L,TBC1D22A,VWA8,YME1L1	36.43	0.00199	0.140947
GO:1901292	nucleoside phosphate catabolic process	Biological Process	1439	45	ABCA10,ACAP2,AGAP1,ARHGAP26,ASAP2,ATP2C1,BCAS3,BNIP2,CCZ1,CHD2,CHD6,DDX10,DENND2A,DENND4A,DENND5B,DHX9,DOCK5,ERCC6,FARP2,FGFR1,GARNL3,GDI2,GSPT1,ITSN1,MNAT1,PDE4B,PDE5A,PIF1,PMS2,PRKG1,PSD3,RABGEF1,RAPGEF4,RASA1,RASGRF2,RGS22,RHOT1,SIPA1L2,SPAST,STXBP5L,TBC1D22A,TDG,UNG,VWA8,YME1L1	28.96	0.002	0.140947
GO:0046128	purine ribonucleoside metabolic process	Biological Process	1525	47	ABCA10,ACACA,ACAP2,ADAL,AGAP1,ARHGAP26,ASAP2,ATP2C1,BCAS3,BNIP2,CCZ1,CHD2,CHD6,DDX10,DENND2A,DENND4A,DENND5B,DHX9,DOCK5,ERCC6,FARP2,FGFR1,GARNL3,GDI2,GMPS,GSPT1,ITSN1,MNAT1,MTO1,PANK2,PANK3,PIF1,PMS2,PRKG1,PSD3,RABGEF1,RAPGEF4,RASA1,RASGRF2,RGS22,RHOT1,SIPA1L2,SPAST,STXBP5L,TBC1D22A,VWA8,YME1L1	30.69	0.00212	0.145778
GO:0042278	purine nucleoside metabolic process	Biological Process	1528	47	ABCA10,ACACA,ACAP2,ADAL,AGAP1,ARHGAP26,ASAP2,ATP2C1,BCAS3,BNIP2,CCZ1,CHD2,CHD6,DDX10,DENND2A,DENND4A,DENND5B,DHX9,DOCK5,ERCC6,FARP2,FGFR1,GARNL3,GDI2,GMPS,GSPT1,ITSN1,MNAT1,MTO1,PANK2,PANK3,PIF1,PMS2,PRKG1,PSD3,RABGEF1,RAPGEF4,RASA1,RASGRF2,RGS22,RHOT1,SIPA1L2,SPAST,STXBP5L,TBC1D22A,VWA8,YME1L1	30.75	0.0022	0.145778
GO:0033036	macromolecule localization	Biological Process	2633	73	ABCA10,ACACA,ACAP2,AGAP1,AHI1,ANKRD13C,ANKS1B,APPBP2,ATG16L1,ATG7,BBS1,BCAS3,C2CD5,CBLB,CEP112,CLASP1,COX18,CPSF2,CSE1L,CYB5R4,DENND2A,ESYT2,FAF1,FAM126A,FBN1,FCHO2,GDI2,GLI3,HOOK3,ICMT,ITGAL,KDM5B,KLC1,KPNA4,LRP4,LRPPRC,LYST,NBAS,NBEA,NCOA1,NUP133,NUP98,OBSL1,OSBPL1A,PARP11,PCSK5,PEX5L,PICALM,PLA2R1,PMM2,QKI,RABGEF1,RAPGEF4,SCFD1,SEC24B,SETD2,SFT2D2,SIRT3,SPIDR,SQSTM1,STX17,STXBP5L,TBC1D22A,TIMM…	52.99	0.00222	0.145778
GO:0007051	spindle organization	Biological Process	141	9	CEP192,CHEK2,CLASP1,HAUS4,RNF4,SENP6,SMC3,SPAST,TNKS	2.84	0.00223	0.145778
GO:0051225	spindle assembly	Biological Process	90	7	CEP192,CHEK2,CLASP1,HAUS4,RNF4,SENP6,TNKS	1.81	0.00225	0.145778
GO:0019693	ribose phosphate metabolic process	Biological Process	1825	54	ABCA10,ACACA,ACAP2,ADGRD1,ADNP,AGAP1,ARHGAP26,ASAP2,ATP2C1,BCAS3,BNIP2,CCZ1,CHD2,CHD6,COX10,CTPS2,DDX10,DENND2A,DENND4A,DENND5B,DHX9,DOCK5,ERCC6,FARP2,FGFR1,GARNL3,GDI2,GMPS,GPR161,GSPT1,ITSN1,MNAT1,NDUFB2,NDUFV2,PANK2,PANK3,PDE4B,PDE5A,PIF1,PMS2,PRKG1,PSD3,RABGEF1,RAPGEF4,RASA1,RASGRF2,RGS22,RHOT1,SIPA1L2,SPAST,STXBP5L,TBC1D22A,VWA8,YME1L1	36.73	0.00238	0.150488
GO:0016570	histone modification	Biological Process	424	18	ASH1L,ASXL1,ATF2,DPY30,KAT2B,KDM3B,KDM5B,KDM5C,KMT2A,KMT2C,NCOA1,PHF20,PRDM6,SAP130,SETD2,SIRT3,SPI1,UBR2	8.53	0.00245	0.150488
GO:0033121	regulation of purine nucleotide cataboli...	Biological Process	710	26	ACAP2,AGAP1,ARHGAP26,ASAP2,BCAS3,BNIP2,CCZ1,DENND2A,DENND4A,DENND5B,DOCK5,FARP2,FGFR1,GARNL3,GDI2,ITSN1,PRKG1,PSD3,RABGEF1,RAPGEF4,RASA1,RASGRF2,RGS22,SIPA1L2,STXBP5L,TBC1D22A	14.29	0.00246	0.150488
GO:0060049	regulation of protein glycosylation	Biological Process	14	3	ADNP,KAT2B,TMEM59	0.28	0.00249	0.150488
GO:0030811	regulation of nucleotide catabolic proce...	Biological Process	711	26	ACAP2,AGAP1,ARHGAP26,ASAP2,BCAS3,BNIP2,CCZ1,DENND2A,DENND4A,DENND5B,DOCK5,FARP2,FGFR1,GARNL3,GDI2,ITSN1,PRKG1,PSD3,RABGEF1,RAPGEF4,RASA1,RASGRF2,RGS22,SIPA1L2,STXBP5L,TBC1D22A	14.31	0.00251	0.150488
GO:0044248	cellular catabolic process	Biological Process	3089	83	ABCA10,ACAP2,ADAL,AGAP1,ARHGAP26,ASAP2,ATG16L1,ATG7,ATP2C1,ATXN3,BCAS3,BCKDHB,BNIP2,CCZ1,CDC23,CHD2,CHD6,CHEK2,CNOT8,CPEB3,DCN,DDX10,DENND2A,DENND4A,DENND5B,DHX9,DOCK5,ERCC6,FAF1,FARP2,FGFR1,GARNL3,GDI2,GSPT1,HECTD1,HERC3,HERC5,ITSN1,LRPPRC,MARK2,MCCC1,MNAT1,MTDH,NBAS,PDE4B,PDE5A,PHKB,PIF1,PIK3CB,PMS2,POLDIP2,PRKG1,PSD3,PSMD13,RABGEF1,RAPGEF4,RASA1,RASGRF2,RGS22,RHOT1,RNF4,SH3D19,SIPA1L2,SMURF2,S…	62.17	0.00255	0.150638
GO:0009118	regulation of nucleoside metabolic proce...	Biological Process	714	26	ACAP2,AGAP1,ARHGAP26,ASAP2,BCAS3,BNIP2,CCZ1,DENND2A,DENND4A,DENND5B,DOCK5,FARP2,FGFR1,GARNL3,GDI2,ITSN1,PRKG1,PSD3,RABGEF1,RAPGEF4,RASA1,RASGRF2,RGS22,SIPA1L2,STXBP5L,TBC1D22A	14.37	0.00266	0.152869
GO:0072523	purine-containing compound catabolic pro...	Biological Process	1421	44	ABCA10,ACAP2,ADAL,AGAP1,ARHGAP26,ASAP2,ATP2C1,BCAS3,BNIP2,CCZ1,CHD2,CHD6,DDX10,DENND2A,DENND4A,DENND5B,DHX9,DOCK5,ERCC6,FARP2,FGFR1,GARNL3,GDI2,GSPT1,ITSN1,MNAT1,PDE4B,PDE5A,PIF1,PMS2,PRKG1,PSD3,RABGEF1,RAPGEF4,RASA1,RASGRF2,RGS22,RHOT1,SIPA1L2,SPAST,STXBP5L,TBC1D22A,VWA8,YME1L1	28.6	0.0027	0.152869
GO:1901136	carbohydrate derivative catabolic proces...	Biological Process	1545	47	ABCA10,ACAP2,ADAL,AGAP1,ARHGAP26,ASAP2,ATP2C1,BCAS3,BNIP2,CCZ1,CHD2,CHD6,DCN,DDX10,DENND2A,DENND4A,DENND5B,DHX9,DOCK5,ERCC6,FARP2,FGFR1,GARNL3,GDI2,GSPT1,ITSN1,MNAT1,PDE4B,PDE5A,PIF1,PMS2,PRKG1,PSD3,RABGEF1,RAPGEF4,RASA1,RASGRF2,RGS22,RHOT1,SIPA1L2,SPAST,STXBP5L,TBC1D22A,TDG,UNG,VWA8,YME1L1	31.1	0.00274	0.152869
GO:0009150	purine ribonucleotide metabolic process	Biological Process	1795	53	ABCA10,ACACA,ACAP2,ADGRD1,ADNP,AGAP1,ARHGAP26,ASAP2,ATP2C1,BCAS3,BNIP2,CCZ1,CHD2,CHD6,COX10,DDX10,DENND2A,DENND4A,DENND5B,DHX9,DOCK5,ERCC6,FARP2,FGFR1,GARNL3,GDI2,GMPS,GPR161,GSPT1,ITSN1,MNAT1,NDUFB2,NDUFV2,PANK2,PANK3,PDE4B,PDE5A,PIF1,PMS2,PRKG1,PSD3,RABGEF1,RAPGEF4,RASA1,RASGRF2,RGS22,RHOT1,SIPA1L2,SPAST,STXBP5L,TBC1D22A,VWA8,YME1L1	36.13	0.00274	0.152869
GO:0010508	positive regulation of autophagy	Biological Process	71	6	ATG7,DCN,MTDH,PIK3CB,SQSTM1,TMEM59	1.43	0.00303	0.164429
GO:0034643	establishment of mitochondrion localizat...	Biological Process	15	3	LRPPRC,RHOT1,SPAST	0.3	0.00307	0.164429
GO:0047497	mitochondrion transport along microtubul...	Biological Process	15	3	LRPPRC,RHOT1,SPAST	0.3	0.00307	0.164429
GO:0046700	heterocycle catabolic process	Biological Process	1770	52	ABCA10,ACAP2,ADAL,AGAP1,ARHGAP26,ASAP2,ATP2C1,BCAS3,BNIP2,CCZ1,CHD2,CHD6,CNOT8,CPEB3,DDX10,DENND2A,DENND4A,DENND5B,DHX9,DOCK5,ERCC6,FARP2,FGFR1,GARNL3,GDI2,GSPT1,ITSN1,LRPPRC,MNAT1,NBAS,PDE4B,PDE5A,PIF1,PMS2,PRKG1,PSD3,RABGEF1,RAPGEF4,RASA1,RASGRF2,RGS22,RHOT1,SIPA1L2,SPAST,STXBP5L,TBC1D22A,TDG,TNRC6C,UNG,VWA8,YME1L1,ZC3HAV1	35.62	0.00335	0.171225
GO:0009154	purine ribonucleotide catabolic process	Biological Process	1397	43	ABCA10,ACAP2,AGAP1,ARHGAP26,ASAP2,ATP2C1,BCAS3,BNIP2,CCZ1,CHD2,CHD6,DDX10,DENND2A,DENND4A,DENND5B,DHX9,DOCK5,ERCC6,FARP2,FGFR1,GARNL3,GDI2,GSPT1,ITSN1,MNAT1,PDE4B,PDE5A,PIF1,PMS2,PRKG1,PSD3,RABGEF1,RAPGEF4,RASA1,RASGRF2,RGS22,RHOT1,SIPA1L2,SPAST,STXBP5L,TBC1D22A,VWA8,YME1L1	28.12	0.00337	0.171225
GO:0006163	purine nucleotide metabolic process	Biological Process	1813	53	ABCA10,ACACA,ACAP2,ADGRD1,ADNP,AGAP1,ARHGAP26,ASAP2,ATP2C1,BCAS3,BNIP2,CCZ1,CHD2,CHD6,COX10,DDX10,DENND2A,DENND4A,DENND5B,DHX9,DOCK5,ERCC6,FARP2,FGFR1,GARNL3,GDI2,GMPS,GPR161,GSPT1,ITSN1,MNAT1,NDUFB2,NDUFV2,PANK2,PANK3,PDE4B,PDE5A,PIF1,PMS2,PRKG1,PSD3,RABGEF1,RAPGEF4,RASA1,RASGRF2,RGS22,RHOT1,SIPA1L2,SPAST,STXBP5L,TBC1D22A,VWA8,YME1L1	36.49	0.00338	0.171225
GO:0044270	cellular nitrogen compound catabolic pro...	Biological Process	1771	52	ABCA10,ACAP2,ADAL,AGAP1,ARHGAP26,ASAP2,ATP2C1,BCAS3,BNIP2,CCZ1,CHD2,CHD6,CNOT8,CPEB3,DDX10,DENND2A,DENND4A,DENND5B,DHX9,DOCK5,ERCC6,FARP2,FGFR1,GARNL3,GDI2,GSPT1,ITSN1,LRPPRC,MNAT1,NBAS,PDE4B,PDE5A,PIF1,PMS2,PRKG1,PSD3,RABGEF1,RAPGEF4,RASA1,RASGRF2,RGS22,RHOT1,SIPA1L2,SPAST,STXBP5L,TBC1D22A,TDG,TNRC6C,UNG,VWA8,YME1L1,ZC3HAV1	35.64	0.00338	0.171225
GO:0009261	ribonucleotide catabolic process	Biological Process	1398	43	ABCA10,ACAP2,AGAP1,ARHGAP26,ASAP2,ATP2C1,BCAS3,BNIP2,CCZ1,CHD2,CHD6,DDX10,DENND2A,DENND4A,DENND5B,DHX9,DOCK5,ERCC6,FARP2,FGFR1,GARNL3,GDI2,GSPT1,ITSN1,MNAT1,PDE4B,PDE5A,PIF1,PMS2,PRKG1,PSD3,RABGEF1,RAPGEF4,RASA1,RASGRF2,RGS22,RHOT1,SIPA1L2,SPAST,STXBP5L,TBC1D22A,VWA8,YME1L1	28.14	0.00341	0.171225
GO:0031047	gene silencing by RNA	Biological Process	124	8	CNOT8,NUP133,NUP98,PUM1,PUM2,TNRC6C,TSN,TSNAX	2.5	0.00361	0.175574
GO:0006260	DNA replication	Biological Process	338	15	ATF1,ATRIP,CHEK2,DKC1,MCM9,MCMBP,NFIC,NUP98,PDS5A,PIF1,POLI,PRIMPOL,PTGES3,SMC3,TNKS	6.8	0.00365	0.175574
GO:0019439	aromatic compound catabolic process	Biological Process	1778	52	ABCA10,ACAP2,ADAL,AGAP1,ARHGAP26,ASAP2,ATP2C1,BCAS3,BNIP2,CCZ1,CHD2,CHD6,CNOT8,CPEB3,DDX10,DENND2A,DENND4A,DENND5B,DHX9,DOCK5,ERCC6,FARP2,FGFR1,GARNL3,GDI2,GSPT1,ITSN1,LRPPRC,MNAT1,NBAS,PDE4B,PDE5A,PIF1,PMS2,PRKG1,PSD3,RABGEF1,RAPGEF4,RASA1,RASGRF2,RGS22,RHOT1,SIPA1L2,SPAST,STXBP5L,TBC1D22A,TDG,TNRC6C,UNG,VWA8,YME1L1,ZC3HAV1	35.78	0.00367	0.175574
GO:0006900	membrane budding	Biological Process	99	7	FCHO2,PICALM,PPP6R3,SCFD1,SEC24B,TFG,USO1	1.99	0.00385	0.175574
GO:0046434	organophosphate catabolic process	Biological Process	1490	45	ABCA10,ACAP2,AGAP1,ARHGAP26,ASAP2,ATP2C1,BCAS3,BNIP2,CCZ1,CHD2,CHD6,DDX10,DENND2A,DENND4A,DENND5B,DHX9,DOCK5,ERCC6,FARP2,FGFR1,GARNL3,GDI2,GSPT1,ITSN1,MNAT1,PDE4B,PDE5A,PIF1,PMS2,PRKG1,PSD3,RABGEF1,RAPGEF4,RASA1,RASGRF2,RGS22,RHOT1,SIPA1L2,SPAST,STXBP5L,TBC1D22A,TDG,UNG,VWA8,YME1L1	29.99	0.00386	0.175574
GO:0010835	regulation of protein ADP-ribosylation	Biological Process	5	2	ADNP,KAT2B	0.1	0.00388	0.175574
GO:0090230	regulation of centromere complex assembl...	Biological Process	5	2	RNF4,SENP6	0.1	0.00388	0.175574
GO:2001023	regulation of response to drug	Biological Process	5	2	KMT2A,NCOA1	0.1	0.00388	0.175574
GO:1900542	regulation of purine nucleotide metaboli...	Biological Process	888	30	ACAP2,ADGRD1,ADNP,AGAP1,ARHGAP26,ASAP2,BCAS3,BNIP2,CCZ1,DENND2A,DENND4A,DENND5B,DOCK5,FARP2,FGFR1,GARNL3,GDI2,GPR161,ITSN1,PDE5A,PRKG1,PSD3,RABGEF1,RAPGEF4,RASA1,RASGRF2,RGS22,SIPA1L2,STXBP5L,TBC1D22A	17.87	0.00389	0.175574
GO:0000209	protein polyubiquitination	Biological Process	244	12	CBLB,CDC23,HERC5,PSMD13,RC3H2,RNF4,SMURF2,TNKS,TTC3,UBE2D2,UBE3C,UBR2	4.91	0.00401	0.17898
GO:0006195	purine nucleotide catabolic process	Biological Process	1412	43	ABCA10,ACAP2,AGAP1,ARHGAP26,ASAP2,ATP2C1,BCAS3,BNIP2,CCZ1,CHD2,CHD6,DDX10,DENND2A,DENND4A,DENND5B,DHX9,DOCK5,ERCC6,FARP2,FGFR1,GARNL3,GDI2,GSPT1,ITSN1,MNAT1,PDE4B,PDE5A,PIF1,PMS2,PRKG1,PSD3,RABGEF1,RAPGEF4,RASA1,RASGRF2,RGS22,RHOT1,SIPA1L2,SPAST,STXBP5L,TBC1D22A,VWA8,YME1L1	28.42	0.00408	0.180103
GO:0006140	regulation of nucleotide metabolic proce...	Biological Process	892	30	ACAP2,ADGRD1,ADNP,AGAP1,ARHGAP26,ASAP2,BCAS3,BNIP2,CCZ1,DENND2A,DENND4A,DENND5B,DOCK5,FARP2,FGFR1,GARNL3,GDI2,GPR161,ITSN1,PDE5A,PRKG1,PSD3,RABGEF1,RAPGEF4,RASA1,RASGRF2,RGS22,SIPA1L2,STXBP5L,TBC1D22A	17.95	0.00415	0.180549
GO:0000226	microtubule cytoskeleton organization	Biological Process	446	18	ATXN3,BCAS3,CCSER2,CDK5RAP2,CEP192,CHEK2,CLASP1,HAUS4,HOOK3,MARK2,OBSL1,RNF4,SDCCAG8,SENP6,SMC3,SPAST,TBCE,TNKS	8.98	0.00418	0.180549
GO:0044260	cellular macromolecule metabolic process	Biological Process	8291	191	ABI1,ADNP,AEBP2,AHI1,ALG9,ANKRD13C,APBB2,AQR,ASH1L,ASPHD1,ASXL1,ATF1,ATF2,ATG7,ATRIP,ATXN1,ATXN3,BCAS3,BRWD1,CALCOCO1,CAMLG,CBLB,CDC23,CDC42BPA,CDK5RAP2,CELF2,CHD2,CHD6,CHEK2,CLK1,CLNS1A,CNOT8,CNTN1,CPEB3,CPSF2,CREBRF,CRIM1,CYFIP2,DCN,DDX10,DENND4A,DHX9,DKC1,DPY30,ERCC6,ERP44,FAF1,FBN1,FGFR1,FKBP5,FLI1,FOXK2,FPGT-TNNI3K,GABPA,GIGYF2,GLI3,GRK4,GSPT1,GTF2A1L,GTF2F2,HECTD1,HERC3,HERC5,HNRNPM,HP1BP3,…	166.87	0.00428	0.182902
GO:0051654	establishment of mitochondrion localizat...	Biological Process	17	3	LRPPRC,RHOT1,SPAST	0.34	0.00446	0.186623
GO:0055119	relaxation of cardiac muscle	Biological Process	17	3	PDE4B,PDE5A,SLC8A1	0.34	0.00446	0.186623
GO:0006903	vesicle targeting	Biological Process	77	6	CLASP1,PPP6R3,SCFD1,SEC24B,TFG,USO1	1.55	0.00454	0.188012
GO:0016925	protein sumoylation	Biological Process	129	8	NUP133,NUP98,RNF4,SENP6,SMC3,STAG1,TDG,UBA2	2.6	0.00459	0.188143
GO:0006152	purine nucleoside catabolic process	Biological Process	1383	42	ABCA10,ACAP2,ADAL,AGAP1,ARHGAP26,ASAP2,ATP2C1,BCAS3,BNIP2,CCZ1,CHD2,CHD6,DDX10,DENND2A,DENND4A,DENND5B,DHX9,DOCK5,ERCC6,FARP2,FGFR1,GARNL3,GDI2,GSPT1,ITSN1,MNAT1,PIF1,PMS2,PRKG1,PSD3,RABGEF1,RAPGEF4,RASA1,RASGRF2,RGS22,RHOT1,SIPA1L2,SPAST,STXBP5L,TBC1D22A,VWA8,YME1L1	27.83	0.00476	0.191209
GO:0046130	purine ribonucleoside catabolic process	Biological Process	1383	42	ABCA10,ACAP2,ADAL,AGAP1,ARHGAP26,ASAP2,ATP2C1,BCAS3,BNIP2,CCZ1,CHD2,CHD6,DDX10,DENND2A,DENND4A,DENND5B,DHX9,DOCK5,ERCC6,FARP2,FGFR1,GARNL3,GDI2,GSPT1,ITSN1,MNAT1,PIF1,PMS2,PRKG1,PSD3,RABGEF1,RAPGEF4,RASA1,RASGRF2,RGS22,RHOT1,SIPA1L2,SPAST,STXBP5L,TBC1D22A,VWA8,YME1L1	27.83	0.00476	0.191209
GO:0006325	chromatin organization	Biological Process	710	25	AEBP2,ASH1L,ASXL1,ATF2,CHD2,CHD6,DPY30,HP1BP3,KAT2B,KDM3B,KDM5B,KDM5C,KMT2A,KMT2C,NCOA1,NUP133,PHF20,PRDM6,SAP130,SETD2,SIRT3,SPI1,TDG,TDRD3,UBR2	14.29	0.0049	0.194884
GO:1901565	organonitrogen compound catabolic proces...	Biological Process	1721	50	ABCA10,ACAP2,ADAL,AGAP1,ARHGAP26,ASAP2,ATP2C1,BCAS3,BCKDHB,BNIP2,CCZ1,CHD2,CHD6,DCN,DDX10,DENND2A,DENND4A,DENND5B,DHX9,DOCK5,ERCC6,FARP2,FGFR1,GARNL3,GDI2,GSPT1,ITSN1,MCCC1,MNAT1,PDE4B,PDE5A,PIF1,PMS2,PRKG1,PSD3,RABGEF1,RAPGEF4,RASA1,RASGRF2,RGS22,RHOT1,SIPA1L2,SPAST,STXBP5L,TBC1D22A,TDG,THNSL2,UNG,VWA8,YME1L1	34.64	0.005	0.196015
GO:1901361	organic cyclic compound catabolic proces...	Biological Process	1810	52	ABCA10,ACAP2,ADAL,AGAP1,ARHGAP26,ASAP2,ATP2C1,BCAS3,BNIP2,CCZ1,CHD2,CHD6,CNOT8,CPEB3,DDX10,DENND2A,DENND4A,DENND5B,DHX9,DOCK5,ERCC6,FARP2,FGFR1,GARNL3,GDI2,GSPT1,ITSN1,LRPPRC,MNAT1,NBAS,PDE4B,PDE5A,PIF1,PMS2,PRKG1,PSD3,RABGEF1,RAPGEF4,RASA1,RASGRF2,RGS22,RHOT1,SIPA1L2,SPAST,STXBP5L,TBC1D22A,TDG,TNRC6C,UNG,VWA8,YME1L1,ZC3HAV1	36.43	0.00524	0.196015
GO:0015936	coenzyme A metabolic process	Biological Process	18	3	ACACA,PANK2,PANK3	0.36	0.00527	0.196015
GO:0033866	nucleoside bisphosphate biosynthetic pro...	Biological Process	18	3	ACACA,PANK2,PANK3	0.36	0.00527	0.196015
GO:0034030	ribonucleoside bisphosphate biosynthetic...	Biological Process	18	3	ACACA,PANK2,PANK3	0.36	0.00527	0.196015
GO:0034033	purine nucleoside bisphosphate biosynthe...	Biological Process	18	3	ACACA,PANK2,PANK3	0.36	0.00527	0.196015
GO:0061157	mRNA destabilization	Biological Process	18	3	CPEB3,PUM1,QKI	0.36	0.00527	0.196015
GO:0008104	protein localization	Biological Process	2330	64	ACAP2,AGAP1,AHI1,ANKRD13C,ANKS1B,APPBP2,ATG16L1,ATG7,BBS1,BCAS3,C2CD5,CBLB,CEP112,CLASP1,COX18,CPSF2,CSE1L,CYB5R4,DENND2A,FAF1,FAM126A,FBN1,FCHO2,GDI2,GLI3,HOOK3,ICMT,ITGAL,KLC1,KPNA4,LRP4,LYST,NBAS,NBEA,NUP133,NUP98,OBSL1,PARP11,PCSK5,PEX5L,PICALM,PMM2,RABGEF1,RAPGEF4,SCFD1,SEC24B,SETD2,SFT2D2,SIRT3,SPIDR,SQSTM1,STX17,STXBP5L,TBC1D22A,TIMM23B,TMEM59,TNKS,TRAM1,TSNAX,TTC7B,UEVLD,USO1,VPS13A,VPS50	46.89	0.00538	0.19827
GO:0042454	ribonucleoside catabolic process	Biological Process	1394	42	ABCA10,ACAP2,ADAL,AGAP1,ARHGAP26,ASAP2,ATP2C1,BCAS3,BNIP2,CCZ1,CHD2,CHD6,DDX10,DENND2A,DENND4A,DENND5B,DHX9,DOCK5,ERCC6,FARP2,FGFR1,GARNL3,GDI2,GSPT1,ITSN1,MNAT1,PIF1,PMS2,PRKG1,PSD3,RABGEF1,RAPGEF4,RASA1,RASGRF2,RGS22,RHOT1,SIPA1L2,SPAST,STXBP5L,TBC1D22A,VWA8,YME1L1	28.06	0.00546	0.199389
GO:0009060	aerobic respiration	Biological Process	57	5	COX10,DLAT,ME3,PANK2,SIRT3	1.15	0.0057	0.200501
GO:0000972	transcription-dependent tethering of RNA...	Biological Process	6	2	NUP133,NUP98	0.12	0.00574	0.200501
GO:0007256	activation of JNKK activity	Biological Process	6	2	ERCC6,NRK	0.12	0.00574	0.200501
GO:0034720	histone H3-K4 demethylation	Biological Process	6	2	KDM5B,KDM5C	0.12	0.00574	0.200501
GO:1901621	negative regulation of smoothened signal...	Biological Process	6	2	GPR161,PRKACB	0.12	0.00574	0.200501
GO:0006281	DNA repair	Biological Process	498	19	AQR,ATRIP,ATXN3,CHEK2,ERCC6,MCM9,MNAT1,PDS5A,PDS5B,PIF1,PMS2,POLI,PRIMPOL,PRKDC,SETD2,SMC3,SPIDR,TDG,UNG	10.02	0.00598	0.207083
GO:0009164	nucleoside catabolic process	Biological Process	1405	42	ABCA10,ACAP2,ADAL,AGAP1,ARHGAP26,ASAP2,ATP2C1,BCAS3,BNIP2,CCZ1,CHD2,CHD6,DDX10,DENND2A,DENND4A,DENND5B,DHX9,DOCK5,ERCC6,FARP2,FGFR1,GARNL3,GDI2,GSPT1,ITSN1,MNAT1,PIF1,PMS2,PRKG1,PSD3,RABGEF1,RAPGEF4,RASA1,RASGRF2,RGS22,RHOT1,SIPA1L2,SPAST,STXBP5L,TBC1D22A,VWA8,YME1L1	28.28	0.00624	0.211652
GO:0009203	ribonucleoside triphosphate catabolic pr...	Biological Process	1364	41	ABCA10,ACAP2,AGAP1,ARHGAP26,ASAP2,ATP2C1,BCAS3,BNIP2,CCZ1,CHD2,CHD6,DDX10,DENND2A,DENND4A,DENND5B,DHX9,DOCK5,ERCC6,FARP2,FGFR1,GARNL3,GDI2,GSPT1,ITSN1,MNAT1,PIF1,PMS2,PRKG1,PSD3,RABGEF1,RAPGEF4,RASA1,RASGRF2,RGS22,RHOT1,SIPA1L2,SPAST,STXBP5L,TBC1D22A,VWA8,YME1L1	27.45	0.00627	0.211652
GO:0009207	purine ribonucleoside triphosphate catab...	Biological Process	1364	41	ABCA10,ACAP2,AGAP1,ARHGAP26,ASAP2,ATP2C1,BCAS3,BNIP2,CCZ1,CHD2,CHD6,DDX10,DENND2A,DENND4A,DENND5B,DHX9,DOCK5,ERCC6,FARP2,FGFR1,GARNL3,GDI2,GSPT1,ITSN1,MNAT1,PIF1,PMS2,PRKG1,PSD3,RABGEF1,RAPGEF4,RASA1,RASGRF2,RGS22,RHOT1,SIPA1L2,SPAST,STXBP5L,TBC1D22A,VWA8,YME1L1	27.45	0.00627	0.211652
GO:0051668	localization within membrane	Biological Process	109	7	ANKS1B,CEP112,COX18,ITGAL,LRP4,NUP133,SEC24B	2.19	0.0065	0.217587
GO:0009146	purine nucleoside triphosphate catabolic...	Biological Process	1368	41	ABCA10,ACAP2,AGAP1,ARHGAP26,ASAP2,ATP2C1,BCAS3,BNIP2,CCZ1,CHD2,CHD6,DDX10,DENND2A,DENND4A,DENND5B,DHX9,DOCK5,ERCC6,FARP2,FGFR1,GARNL3,GDI2,GSPT1,ITSN1,MNAT1,PIF1,PMS2,PRKG1,PSD3,RABGEF1,RAPGEF4,RASA1,RASGRF2,RGS22,RHOT1,SIPA1L2,SPAST,STXBP5L,TBC1D22A,VWA8,YME1L1	27.53	0.00658	0.218445
GO:1901658	glycosyl compound catabolic process	Biological Process	1411	42	ABCA10,ACAP2,ADAL,AGAP1,ARHGAP26,ASAP2,ATP2C1,BCAS3,BNIP2,CCZ1,CHD2,CHD6,DDX10,DENND2A,DENND4A,DENND5B,DHX9,DOCK5,ERCC6,FARP2,FGFR1,GARNL3,GDI2,GSPT1,ITSN1,MNAT1,PIF1,PMS2,PRKG1,PSD3,RABGEF1,RAPGEF4,RASA1,RASGRF2,RGS22,RHOT1,SIPA1L2,SPAST,STXBP5L,TBC1D22A,VWA8,YME1L1	28.4	0.0067	0.220606
GO:0051028	mRNA transport	Biological Process	138	8	CPSF2,LRPPRC,NUP133,NUP98,PARP11,QKI,SETD2,TNKS	2.78	0.00685	0.220626
GO:0016070	RNA metabolic process	Biological Process	4492	111	ADNP,AEBP2,AHI1,APBB2,AQR,ASH1L,ASXL1,ATF1,ATF2,ATXN1,ATXN3,BCAS3,BRWD1,CALCOCO1,CDK5RAP2,CELF2,CHD2,CHD6,CHEK2,CLK1,CLNS1A,CNOT8,CPEB3,CPSF2,CREBRF,DCN,DDX10,DENND4A,DHX9,DKC1,DPY30,ERCC6,FBN1,FGFR1,FLI1,FOXK2,GABPA,GLI3,GSPT1,GTF2A1L,GTF2F2,HNRNPM,HP1BP3,KAT2B,KDM3B,KDM5B,KDM5C,KMT2A,KMT2C,LRP4,LRPPRC,LUC7L,MAPK10,MED13,MEF2A,METTL15,MNAT1,MTDH,MTO1,NBAS,NCOA1,NFATC3,NFIC,NFYB,NUP133,NUP98,PHF2…	90.41	0.00691	0.220626
GO:0051056	regulation of small GTPase mediated sign...	Biological Process	295	13	ARHGAP26,FARP2,GARNL3,GDI2,ITSN1,PSD3,RABGEF1,RASA1,RASGRF2,RHOT1,SCAI,SIPA1L2,SQSTM1	5.94	0.00697	0.220626
GO:0009143	nucleoside triphosphate catabolic proces...	Biological Process	1374	41	ABCA10,ACAP2,AGAP1,ARHGAP26,ASAP2,ATP2C1,BCAS3,BNIP2,CCZ1,CHD2,CHD6,DDX10,DENND2A,DENND4A,DENND5B,DHX9,DOCK5,ERCC6,FARP2,FGFR1,GARNL3,GDI2,GSPT1,ITSN1,MNAT1,PIF1,PMS2,PRKG1,PSD3,RABGEF1,RAPGEF4,RASA1,RASGRF2,RGS22,RHOT1,SIPA1L2,SPAST,STXBP5L,TBC1D22A,VWA8,YME1L1	27.65	0.00708	0.220626
GO:0048207	vesicle targeting, rough ER to cis-Golgi	Biological Process	60	5	PPP6R3,SCFD1,SEC24B,TFG,USO1	1.21	0.00708	0.220626
GO:0048208	COPII vesicle coating	Biological Process	60	5	PPP6R3,SCFD1,SEC24B,TFG,USO1	1.21	0.00708	0.220626
GO:0035418	protein localization to synapse	Biological Process	20	3	ANKS1B,CEP112,KLC1	0.4	0.00714	0.220626
GO:0050779	RNA destabilization	Biological Process	20	3	CPEB3,PUM1,QKI	0.4	0.00714	0.220626
GO:0031331	positive regulation of cellular cataboli...	Biological Process	298	13	ATG7,CDC23,CNOT8,CPEB3,DCN,MTDH,PIK3CB,PSMD13,SH3D19,SQSTM1,TMEM59,TNRC6C,ZC3HAV1	6	0.00756	0.231821
GO:0007017	microtubule-based process	Biological Process	623	22	ATXN3,BCAS3,CCSER2,CDK5RAP2,CEP192,CHEK2,CLASP1,HAUS4,HOOK3,KLC1,LRPPRC,MARK2,MEMO1,OBSL1,RHOT1,RNF4,SDCCAG8,SENP6,SMC3,SPAST,TBCE,TNKS	12.54	0.00782	0.232517
GO:0044557	relaxation of smooth muscle	Biological Process	7	2	PRKG1,SLC8A1	0.14	0.00793	0.232517
GO:0060628	regulation of ER to Golgi vesicle-mediat...	Biological Process	7	2	SCFD1,SEC24B	0.14	0.00793	0.232517
GO:1900246	positive regulation of RIG-I signaling p...	Biological Process	7	2	PUM1,PUM2	0.14	0.00793	0.232517
GO:1901620	regulation of smoothened signaling pathw...	Biological Process	7	2	GPR161,PRKACB	0.14	0.00793	0.232517
GO:1902369	negative regulation of RNA catabolic pro...	Biological Process	7	2	LRPPRC,NBAS	0.14	0.00793	0.232517
GO:0010256	endomembrane system organization	Biological Process	513	19	BBS1,BCAS3,C2CD5,CLASP1,FAM126A,FCHO2,HOOK3,LYST,NUP133,NUP98,OBSL1,PARP11,RFX2,SERPINE2,SPAST,STX17,TMEM59,TTC7B,USO1	10.32	0.0081	0.23578
GO:0007064	mitotic sister chromatid cohesion	Biological Process	21	3	PDS5A,PDS5B,SMC3	0.42	0.00821	0.236716
GO:0090304	nucleic acid metabolic process	Biological Process	5082	123	ADNP,AEBP2,AHI1,APBB2,AQR,ASH1L,ASXL1,ATF1,ATF2,ATRIP,ATXN1,ATXN3,BCAS3,BRWD1,CALCOCO1,CDK5RAP2,CELF2,CHD2,CHD6,CHEK2,CLK1,CLNS1A,CNOT8,CPEB3,CPSF2,CREBRF,DCN,DDX10,DENND4A,DHX9,DKC1,DPY30,ERCC6,FBN1,FGFR1,FLI1,FOXK2,GABPA,GLI3,GSPT1,GTF2A1L,GTF2F2,HNRNPM,HP1BP3,KAT2B,KDM3B,KDM5B,KDM5C,KMT2A,KMT2C,LRP4,LRPPRC,LUC7L,MAPK10,MCM9,MCMBP,MED13,MEF2A,METTL15,MNAT1,MTDH,MTO1,NBAS,NCOA1,NFATC3,NFIC,NFYB,…	102.28	0.00825	0.236716
GO:0009199	ribonucleoside triphosphate metabolic pr...	Biological Process	1561	45	ABCA10,ACAP2,AGAP1,ARHGAP26,ASAP2,ATP2C1,BCAS3,BNIP2,CCZ1,CHD2,CHD6,COX10,CTPS2,DDX10,DENND2A,DENND4A,DENND5B,DHX9,DOCK5,ERCC6,FARP2,FGFR1,GARNL3,GDI2,GSPT1,ITSN1,MNAT1,NDUFB2,NDUFV2,PIF1,PMS2,PRKG1,PSD3,RABGEF1,RAPGEF4,RASA1,RASGRF2,RGS22,RHOT1,SIPA1L2,SPAST,STXBP5L,TBC1D22A,VWA8,YME1L1	31.42	0.00883	0.251561
GO:0051640	organelle localization	Biological Process	482	18	CDC23,CDK5RAP2,CLASP1,HOOK3,ITSN1,LRPPRC,MARK2,MEF2A,NUP98,PICALM,PPP6R3,RABGEF1,RHOT1,SCFD1,SEC24B,SPAST,TFG,USO1	9.7	0.00907	0.256189
GO:0009791	post-embryonic development	Biological Process	89	6	FBN1,GIGYF2,KDM5B,KMT2A,RC3H2,TBCE	1.79	0.00912	0.256189
GO:0090114	COPII-coated vesicle budding	Biological Process	64	5	PPP6R3,SCFD1,SEC24B,TFG,USO1	1.29	0.00927	0.258594
GO:0040029	regulation of gene expression, epigeneti...	Biological Process	274	12	AEBP2,CNOT8,DPY30,ERCC6,KAT2B,KMT2A,PUM1,PUM2,SPI1,TDG,TNRC6C,UBR2	5.51	0.00979	0.271217
GO:0048199	vesicle targeting, to, from or within Go...	Biological Process	65	5	PPP6R3,SCFD1,SEC24B,TFG,USO1	1.31	0.00988	0.271835
GO:0043085	positive regulation of catalytic activit...	Biological Process	1488	43	ABI1,ACAP2,ADGRD1,ADNP,AGAP1,ARHGAP26,ASAP2,BCAS3,BNIP2,CCZ1,CDC23,CYFIP2,DENND2A,DENND4A,DENND5B,DKC1,DOCK5,ERCC6,FARP2,FGFR1,GARNL3,GDI2,ITSN1,MAPK10,MARK2,NRK,PDE5A,PDGFD,PIK3CB,PRKACB,PSD3,PSMD13,RABGEF1,RAPGEF4,RASA1,RASGRF2,RGS22,SIPA1L2,STK3,STXBP5L,TBC1D22A,TNKS,UBA2	29.95	0.01002	0.272321
GO:0044267	cellular protein metabolic process	Biological Process	4829	117	ABI1,ADNP,ALG9,ASH1L,ASPHD1,ASXL1,ATF2,ATG7,ATXN3,CBLB,CDC23,CDC42BPA,CHEK2,CLK1,CNOT8,CNTN1,CPEB3,CRIM1,CYFIP2,DCN,DPY30,ERCC6,ERP44,FAF1,FGFR1,FKBP5,FPGT-TNNI3K,GIGYF2,GRK4,GSPT1,HECTD1,HERC3,HERC5,ICMT,KAT2B,KDM3B,KDM5B,KDM5C,KMT2A,KMT2C,LIMK2,LRP4,LRPPRC,LTBP4,LTN1,MAN1A2,MAPK10,MARK2,MEF2A,MERTK,MNAT1,MTMR1,NCOA1,NRK,NUP133,NUP98,PCSK5,PDE5A,PDGFD,PHF20,PHKB,PIGN,PIK3CB,PMM2,PPIL6,PPM1H,PPP6…	97.19	0.01012	0.272321
GO:0016458	gene silencing	Biological Process	210	10	CNOT8,DPY30,NUP133,NUP98,PUM1,PUM2,TNRC6C,TSN,TSNAX,UBR2	4.23	0.01026	0.272321
GO:0034654	nucleobase-containing compound biosynthe...	Biological Process	4223	104	ACACA,ADAL,ADGRD1,ADNP,AEBP2,AHI1,APBB2,ASH1L,ASXL1,ATF1,ATF2,ATXN1,ATXN3,BCAS3,BRWD1,CALCOCO1,CDK5RAP2,CHD2,CHD6,CHEK2,CNOT8,CPEB3,CPSF2,CREBRF,CTPS2,DCN,DCTD,DENND4A,DKC1,DPY30,ERCC6,FBN1,FGFR1,FLI1,FOXK2,GABPA,GLI3,GMPS,GPR161,GTF2A1L,GTF2F2,HP1BP3,KAT2B,KDM3B,KDM5B,KDM5C,KMT2A,KMT2C,LRP4,LRPPRC,MAPK10,MED13,MEF2A,MNAT1,MTDH,NCOA1,NFATC3,NFIC,NFYB,NUP133,NUP98,PANK2,PANK3,PHF20,PICALM,PIF1,PMM…	84.99	0.01038	0.272321
GO:0035520	monoubiquitinated protein deubiquitinati...	Biological Process	8	2	ASXL1,ATXN3	0.16	0.01044	0.272321
GO:0045008	depyrimidination	Biological Process	8	2	TDG,UNG	0.16	0.01044	0.272321
GO:0097105	presynaptic membrane assembly	Biological Process	8	2	LRP4,NLGN4X	0.16	0.01044	0.272321
GO:0099054	presynapse assembly	Biological Process	8	2	LRP4,NLGN4X	0.16	0.01044	0.272321
GO:0021904	dorsal/ventral neural tube patterning	Biological Process	23	3	GLI3,GPR161,PRKACB	0.46	0.01062	0.275229
GO:0045995	regulation of embryonic development	Biological Process	120	7	CLASP1,FGFR1,GPR161,NRK,PRKACB,SEC24B,STK3	2.42	0.01078	0.277585
GO:0000819	sister chromatid segregation	Biological Process	212	10	CDC23,CLASP1,MCMBP,NUP133,NUP98,PDS5A,PDS5B,SMC3,STAG1,ZWILCH	4.27	0.01092	0.279399
GO:0009141	nucleoside triphosphate metabolic proces...	Biological Process	1582	45	ABCA10,ACAP2,AGAP1,ARHGAP26,ASAP2,ATP2C1,BCAS3,BNIP2,CCZ1,CHD2,CHD6,COX10,CTPS2,DDX10,DENND2A,DENND4A,DENND5B,DHX9,DOCK5,ERCC6,FARP2,FGFR1,GARNL3,GDI2,GSPT1,ITSN1,MNAT1,NDUFB2,NDUFV2,PIF1,PMS2,PRKG1,PSD3,RABGEF1,RAPGEF4,RASA1,RASGRF2,RGS22,RHOT1,SIPA1L2,SPAST,STXBP5L,TBC1D22A,VWA8,YME1L1	31.84	0.01107	0.281443
GO:0006259	DNA metabolic process	Biological Process	1081	33	AQR,ASH1L,ATF1,ATRIP,ATXN3,CHD2,CHEK2,DHX9,DKC1,ERCC6,HP1BP3,KMT2A,MCM9,MCMBP,MNAT1,NFIC,NUP98,PDS5A,PDS5B,PIF1,PMS2,POLI,PRIMPOL,PRKDC,PTGES3,SETD2,SMC3,SPI1,SPIDR,TDG,TNKS,TSN,UNG	21.76	0.01114	0.281443
GO:0007005	mitochondrion organization	Biological Process	531	19	COX10,COX18,DCN,GABPA,LRPPRC,MARK2,MEF2A,MTO1,NDUFB2,NDUFV2,PANK2,PIF1,POLDIP2,PRIMPOL,RHOT1,SIRT3,SQSTM1,TIMM23B,YME1L1	10.69	0.01141	0.286462
GO:0008156	negative regulation of DNA replication	Biological Process	44	4	CHEK2,PDS5A,PIF1,SMC3	0.89	0.01162	0.289923
GO:0070076	histone lysine demethylation	Biological Process	24	3	KDM3B,KDM5B,KDM5C	0.48	0.01195	0.292979
GO:0015931	nucleobase-containing compound transport	Biological Process	216	10	CPSF2,LRPPRC,NUP133,NUP98,PARP11,QKI,SETD2,SLC25A26,SLC35D2,TNKS	4.35	0.01233	0.292979
GO:0051252	regulation of RNA metabolic process	Biological Process	3646	91	ADNP,AEBP2,AHI1,APBB2,ASH1L,ASXL1,ATF1,ATF2,ATXN1,ATXN3,BCAS3,BRWD1,CALCOCO1,CDK5RAP2,CHD2,CHD6,CHEK2,CLK1,CNOT8,CPEB3,CREBRF,DCN,DENND4A,DPY30,ERCC6,FBN1,FGFR1,FLI1,FOXK2,GABPA,GLI3,GTF2A1L,GTF2F2,HP1BP3,KAT2B,KDM3B,KDM5B,KDM5C,KMT2A,KMT2C,LRP4,LRPPRC,MAPK10,MED13,MEF2A,MNAT1,MTDH,NBAS,NCOA1,NFATC3,NFIC,NFYB,NUP133,PHF20,PICALM,PRDM6,PRKDC,RASA1,RBM39,RBM5,RFX2,RNF4,SAP130,SCAI,SETD2,SFMBT2,SMUR…	73.38	0.01243	0.292979
GO:0006220	pyrimidine nucleotide metabolic process	Biological Process	45	4	CTPS2,DCTD,TDG,UNG	0.91	0.01255	0.292979
GO:0009205	purine ribonucleoside triphosphate metab...	Biological Process	1555	44	ABCA10,ACAP2,AGAP1,ARHGAP26,ASAP2,ATP2C1,BCAS3,BNIP2,CCZ1,CHD2,CHD6,COX10,DDX10,DENND2A,DENND4A,DENND5B,DHX9,DOCK5,ERCC6,FARP2,FGFR1,GARNL3,GDI2,GSPT1,ITSN1,MNAT1,NDUFB2,NDUFV2,PIF1,PMS2,PRKG1,PSD3,RABGEF1,RAPGEF4,RASA1,RASGRF2,RGS22,RHOT1,SIPA1L2,SPAST,STXBP5L,TBC1D22A,VWA8,YME1L1	31.3	0.01303	0.292979
GO:0090331	negative regulation of platelet aggregat...	Biological Process	9	2	PRKG1,SERPINE2	0.18	0.01324	0.292979
GO:0097120	receptor localization to synapse	Biological Process	9	2	ANKS1B,CEP112	0.18	0.01324	0.292979
GO:0018130	heterocycle biosynthetic process	Biological Process	4307	105	ACACA,ADAL,ADGRD1,ADNP,AEBP2,AHI1,APBB2,ASH1L,ASXL1,ATF1,ATF2,ATXN1,ATXN3,BCAS3,BRWD1,CALCOCO1,CDK5RAP2,CHD2,CHD6,CHEK2,CNOT8,COX10,CPEB3,CPSF2,CREBRF,CTPS2,DCN,DCTD,DENND4A,DKC1,DPY30,ERCC6,FBN1,FGFR1,FLI1,FOXK2,GABPA,GLI3,GMPS,GPR161,GTF2A1L,GTF2F2,HP1BP3,KAT2B,KDM3B,KDM5B,KDM5C,KMT2A,KMT2C,LRP4,LRPPRC,MAPK10,MED13,MEF2A,MNAT1,MTDH,NCOA1,NFATC3,NFIC,NFYB,NUP133,NUP98,PANK2,PANK3,PHF20,PICALM,PI…	86.68	0.01338	0.292979
GO:0007059	chromosome segregation	Biological Process	321	13	CDC23,CDK5RAP2,CLASP1,MCMBP,NUP133,NUP98,PDS5A,PDS5B,PUM1,PUM2,SMC3,STAG1,ZWILCH	6.46	0.01349	0.292979
GO:1901069	guanosine-containing compound catabolic ...	Biological Process	893	28	ACAP2,AGAP1,ARHGAP26,ASAP2,BCAS3,BNIP2,CCZ1,DENND2A,DENND4A,DENND5B,DOCK5,FARP2,FGFR1,GARNL3,GDI2,GSPT1,ITSN1,PRKG1,PSD3,RABGEF1,RAPGEF4,RASA1,RASGRF2,RGS22,RHOT1,SIPA1L2,STXBP5L,TBC1D22A	17.97	0.01357	0.292979
GO:0045935	positive regulation of nucleobase-contai...	Biological Process	1602	45	ADGRD1,ADNP,AHI1,ASH1L,ASXL1,ATF1,ATF2,BCAS3,CALCOCO1,CDK5RAP2,CHD6,CHEK2,CNOT8,CPEB3,DCN,DKC1,ERCC6,FLI1,FOXK2,GABPA,GLI3,GPR161,GTF2F2,KAT2B,KMT2A,MED13,MEF2A,MNAT1,NCOA1,NFATC3,NFIC,NFYB,PICALM,PRKDC,RNF4,SPI1,SPIDR,SQSTM1,STAG1,TASP1,TNKS,TNRC6C,UNG,ZC3HAV1,ZNF516	32.24	0.01362	0.292979
GO:1901068	guanosine-containing compound metabolic ...	Biological Process	934	29	ACAP2,AGAP1,ARHGAP26,ASAP2,BCAS3,BNIP2,CCZ1,DENND2A,DENND4A,DENND5B,DOCK5,FARP2,FGFR1,GARNL3,GDI2,GMPS,GSPT1,ITSN1,PRKG1,PSD3,RABGEF1,RAPGEF4,RASA1,RASGRF2,RGS22,RHOT1,SIPA1L2,STXBP5L,TBC1D22A	18.8	0.01368	0.292979
GO:0019438	aromatic compound biosynthetic process	Biological Process	4311	105	ACACA,ADAL,ADGRD1,ADNP,AEBP2,AHI1,APBB2,ASH1L,ASXL1,ATF1,ATF2,ATXN1,ATXN3,BCAS3,BRWD1,CALCOCO1,CDK5RAP2,CHD2,CHD6,CHEK2,CNOT8,COX10,CPEB3,CPSF2,CREBRF,CTPS2,DCN,DCTD,DENND4A,DKC1,DPY30,ERCC6,FBN1,FGFR1,FLI1,FOXK2,GABPA,GLI3,GMPS,GPR161,GTF2A1L,GTF2F2,HP1BP3,KAT2B,KDM3B,KDM5B,KDM5C,KMT2A,KMT2C,LRP4,LRPPRC,MAPK10,MED13,MEF2A,MNAT1,MTDH,NCOA1,NFATC3,NFIC,NFYB,NUP133,NUP98,PANK2,PANK3,PHF20,PICALM,PI…	86.77	0.01374	0.292979
GO:0009144	purine nucleoside triphosphate metabolic...	Biological Process	1561	44	ABCA10,ACAP2,AGAP1,ARHGAP26,ASAP2,ATP2C1,BCAS3,BNIP2,CCZ1,CHD2,CHD6,COX10,DDX10,DENND2A,DENND4A,DENND5B,DHX9,DOCK5,ERCC6,FARP2,FGFR1,GARNL3,GDI2,GSPT1,ITSN1,MNAT1,NDUFB2,NDUFV2,PIF1,PMS2,PRKG1,PSD3,RABGEF1,RAPGEF4,RASA1,RASGRF2,RGS22,RHOT1,SIPA1L2,SPAST,STXBP5L,TBC1D22A,VWA8,YME1L1	31.42	0.01387	0.292979
GO:0051179	localization	Biological Process	5598	132	ABCA10,ABI1,ACACA,ACAP2,AGAP1,AHI1,ANKRD13C,ANKS1B,APBB2,APPBP2,ATG16L1,ATG7,ATP2C1,ATXN1,BBS1,BCAS3,C2CD5,CACHD1,CAPN7,CBLB,CD302,CDC23,CDC42BPA,CDK5RAP2,CEP112,CLASP1,CLNS1A,CNTN1,COX10,COX18,CPSF2,CREBRF,CSE1L,CYB5R4,CYFIP2,DCN,DENND2A,DENND5B,DOCK5,DPY30,ESYT2,FAF1,FAM126A,FBN1,FCHO2,FGFR1,GDI2,GLI3,GRK4,HOOK3,ICMT,ITGAL,ITSN1,KDM5B,KLC1,KMT2A,KPNA4,LRP4,LRPPRC,LTBP4,LYST,MARK2,MDGA1,MEF2A,ME…	112.67	0.01439	0.292979
GO:1903313	positive regulation of mRNA metabolic pr...	Biological Process	47	4	CNOT8,CPEB3,TNRC6C,ZC3HAV1	0.95	0.01456	0.292979
GO:0044271	cellular nitrogen compound biosynthetic ...	Biological Process	4793	115	ACACA,ADAL,ADGRD1,ADNP,AEBP2,AHI1,APBB2,ASH1L,ASXL1,ATF1,ATF2,ATXN1,ATXN3,BCAS3,BRWD1,CALCOCO1,CDK5RAP2,CHD2,CHD6,CHEK2,CNOT8,COX10,CPEB3,CPSF2,CREBRF,CTPS2,DCN,DCTD,DENND4A,DKC1,DPY30,ERCC6,FBN1,FGFR1,FLI1,FOXK2,GABPA,GIGYF2,GLI3,GMPS,GPR161,GSPT1,GTF2A1L,GTF2F2,HP1BP3,KAT2B,KDM3B,KDM5B,KDM5C,KMT2A,KMT2C,LRP4,LRPPRC,MAPK10,MED13,MEF2A,MNAT1,MTDH,MTR,NCOA1,NFATC3,NFIC,NFYB,NUP133,NUP98,PANK2,PANK…	96.47	0.01479	0.292979
GO:0021846	cell proliferation in forebrain	Biological Process	26	3	FGFR1,GLI3,HOOK3	0.52	0.01491	0.292979
GO:0033363	secretory granule organization	Biological Process	26	3	LYST,RFX2,SERPINE2	0.52	0.01491	0.292979
GO:0009163	nucleoside biosynthetic process	Biological Process	128	7	ACACA,ADAL,CTPS2,DCTD,GMPS,PANK2,PANK3	2.58	0.01497	0.292979
GO:1901659	glycosyl compound biosynthetic process	Biological Process	128	7	ACACA,ADAL,CTPS2,DCTD,GMPS,PANK2,PANK3	2.58	0.01497	0.292979
GO:0034968	histone lysine methylation	Biological Process	100	6	ASH1L,DPY30,KMT2A,KMT2C,PRDM6,SETD2	2.01	0.0156	0.292979
GO:0035195	gene silencing by miRNA	Biological Process	48	4	CNOT8,PUM1,PUM2,TNRC6C	0.97	0.01564	0.292979
GO:0016192	vesicle-mediated transport	Biological Process	1445	41	ABI1,AHI1,BBS1,BCAS3,C2CD5,CD302,CLASP1,CYFIP2,DENND2A,ESYT2,FCHO2,GDI2,GRK4,HOOK3,ITGAL,ITSN1,KLC1,LRP4,LYST,MERTK,NBAS,NCKAP1,OSBPL1A,PICALM,PIK3CB,PLA2R1,PPP6R3,RABGEF1,RAPGEF4,SCFD1,SEC24B,SFT2D2,SPAST,STX17,STXBP5L,TBC1D22A,TFG,TRAPPC11,USO1,VPS13A,VPS50	29.08	0.0157	0.292979
GO:0006479	protein methylation	Biological Process	160	8	ASH1L,DPY30,GSPT1,ICMT,KMT2A,KMT2C,PRDM6,SETD2	3.22	0.01582	0.292979
GO:0008213	protein alkylation	Biological Process	160	8	ASH1L,DPY30,GSPT1,ICMT,KMT2A,KMT2C,PRDM6,SETD2	3.22	0.01582	0.292979
GO:0016050	vesicle organization	Biological Process	364	14	C2CD5,FCHO2,HOOK3,LYST,PICALM,PPP6R3,RFX2,SCFD1,SEC24B,SERPINE2,STX17,TBC1D22A,TFG,USO1	7.33	0.01596	0.292979
GO:0006285	base-excision repair, AP site formation	Biological Process	10	2	TDG,UNG	0.2	0.01633	0.292979
GO:0010452	histone H3-K36 methylation	Biological Process	10	2	ASH1L,SETD2	0.2	0.01633	0.292979
GO:0035459	cargo loading into vesicle	Biological Process	10	2	PICALM,SEC24B	0.2	0.01633	0.292979
GO:2000637	positive regulation of gene silencing by...	Biological Process	10	2	PUM1,PUM2	0.2	0.01633	0.292979
GO:0051174	regulation of phosphorus metabolic proce...	Biological Process	2100	56	ABI1,ACAP2,ADGRD1,ADNP,AGAP1,ARHGAP26,ASAP2,ASH1L,BCAS3,BNIP2,CBLB,CCZ1,CEP192,CHEK2,CNTN1,DCN,DENND2A,DENND4A,DENND5B,DLAT,DOCK5,ERCC6,FAF1,FARP2,FGFR1,GARNL3,GDI2,GPR161,HERC5,ITSN1,KAT2B,LRP4,MAPK10,MARK2,MNAT1,NRK,PDE5A,PDGFD,PDHX,PIK3CB,PPP6R3,PRKACB,PRKDC,PRKG1,PSD3,RABGEF1,RAPGEF4,RASA1,RASGRF2,RGS22,SIPA1L2,SIRT3,SQSTM1,STK3,STXBP5L,TBC1D22A	42.27	0.01635	0.292979
GO:0018394	peptidyl-lysine acetylation	Biological Process	161	8	ATF2,KAT2B,KMT2A,NCOA1,PHF20,SAP130,SIRT3,SPI1	3.24	0.01637	0.292979
GO:0000002	mitochondrial genome maintenance	Biological Process	27	3	MEF2A,PIF1,PRIMPOL	0.54	0.01653	0.292979
GO:0010458	exit from mitosis	Biological Process	27	3	CDC23,CLASP1,SPAST	0.54	0.01653	0.292979
GO:0051234	establishment of localization	Biological Process	4581	110	ABCA10,ABI1,ACACA,AGAP1,AHI1,APPBP2,ATG16L1,ATG7,ATP2C1,ATXN1,BBS1,BCAS3,C2CD5,CACHD1,CBLB,CD302,CDC23,CDK5RAP2,CLASP1,CLNS1A,CNTN1,COX10,COX18,CPSF2,CREBRF,CSE1L,CYB5R4,CYFIP2,DENND2A,DENND5B,DPY30,ESYT2,FAF1,FAM126A,FCHO2,FGFR1,GDI2,GLI3,GRK4,HOOK3,ICMT,ITGAL,ITSN1,KDM5B,KLC1,KMT2A,KPNA4,LRP4,LRPPRC,LTBP4,LYST,MERTK,NALCN,NBAS,NCKAP1,NCOA1,NUP133,NUP98,OSBPL1A,PARP11,PCSK5,PDE4B,PEX5L,PICALM,PI…	92.2	0.01723	0.292979
GO:1901137	carbohydrate derivative biosynthetic pro...	Biological Process	750	24	ACACA,ADAL,ADGRD1,ADNP,ALG9,CTPS2,DCN,DCTD,GMPS,GPR161,KAT2B,MAN1A2,PANK2,PANK3,PIGN,PMM2,SIRT3,SLC35D2,ST3GAL3,ST6GAL2,STT3A,TMEM59,TNKS,UGCG	15.09	0.01725	0.292979
GO:0046039	GTP metabolic process	Biological Process	912	28	ACAP2,AGAP1,ARHGAP26,ASAP2,BCAS3,BNIP2,CCZ1,DENND2A,DENND4A,DENND5B,DOCK5,FARP2,FGFR1,GARNL3,GDI2,GSPT1,ITSN1,PRKG1,PSD3,RABGEF1,RAPGEF4,RASA1,RASGRF2,RGS22,RHOT1,SIPA1L2,STXBP5L,TBC1D22A	18.36	0.01747	0.292979
GO:0016577	histone demethylation	Biological Process	28	3	KDM3B,KDM5B,KDM5C	0.56	0.01824	0.292979
GO:0046487	glyoxylate metabolic process	Biological Process	28	3	BCKDHB,DLAT,PDHX	0.56	0.01824	0.292979
GO:0010468	regulation of gene expression	Biological Process	4450	107	ADNP,AEBP2,AHI1,APBB2,ASH1L,ASXL1,ATF1,ATF2,ATXN1,ATXN3,BCAS3,BRWD1,C7,CALCOCO1,CDK5RAP2,CHD2,CHD6,CHEK2,CLK1,CNOT8,CNTN1,CPEB3,CREBRF,DCN,DENND4A,DHX9,DPY30,ERCC6,FBN1,FGFR1,FLI1,FOXK2,GABPA,GIGYF2,GLI3,GSPT1,GTF2A1L,GTF2F2,HP1BP3,KAT2B,KDM3B,KDM5B,KDM5C,KMT2A,KMT2C,LRP4,LRPPRC,MAPK10,MED13,MEF2A,MNAT1,MTDH,NBAS,NCOA1,NFATC3,NFIC,NFYB,NUP133,NUP98,PHF20,PICALM,PIK3CB,PRDM6,PRKACB,PRKDC,PSMD13,PU…	89.56	0.01839	0.292979
GO:0051254	positive regulation of RNA metabolic pro...	Biological Process	1377	39	AHI1,ASH1L,ASXL1,ATF1,ATF2,BCAS3,CALCOCO1,CDK5RAP2,CHD6,CHEK2,CNOT8,CPEB3,DCN,ERCC6,FLI1,FOXK2,GABPA,GLI3,GTF2F2,KAT2B,KMT2A,MED13,MEF2A,MNAT1,NCOA1,NFATC3,NFIC,NFYB,PICALM,PRKDC,RNF4,SPI1,SQSTM1,STAG1,TASP1,TNKS,TNRC6C,ZC3HAV1,ZNF516	27.71	0.01878	0.292979
GO:0006974	cellular response to DNA damage stimulus	Biological Process	756	24	AQR,ATF2,ATRIP,ATXN3,CHD2,CHEK2,CNOT8,ERCC6,GIGYF2,MCM9,MNAT1,PDS5A,PDS5B,PIF1,PLA2R1,PMS2,POLI,PRIMPOL,PRKDC,SETD2,SMC3,SPIDR,TDG,UNG	15.22	0.01879	0.292979
GO:0017148	negative regulation of translation	Biological Process	134	7	CNOT8,CPEB3,GIGYF2,PUM1,PUM2,QKI,TNRC6C	2.7	0.0188	0.292979
GO:0070271	protein complex biogenesis	Biological Process	1251	36	ACACA,ATF1,ATG16L1,CLASP1,COX10,COX18,DGKH,FAF1,FARP2,FCHO2,FCHSD2,GTF2F2,KCTD7,KMT2A,LRP4,MCCC1,MNAT1,NCKAP1,NDUFB2,NDUFV2,NUP98,PEX5L,PICALM,PPP6R3,PSMD13,RASA1,RNF4,SCFD1,SEC24B,SENP6,SPAST,SPIDR,SQSTM1,TBCE,TFG,USO1	25.18	0.01901	0.292979
GO:0071705	nitrogen compound transport	Biological Process	2120	56	ACACA,AGAP1,APPBP2,ATG16L1,ATG7,BBS1,BCAS3,C2CD5,CBLB,COX18,CPSF2,CSE1L,CYB5R4,DENND2A,FAF1,GDI2,GLI3,HOOK3,ICMT,KLC1,KPNA4,LRPPRC,LTBP4,LYST,NBAS,NUP133,NUP98,PARP11,PCSK5,PEX5L,PMM2,QKI,RABGEF1,RAPGEF4,SCFD1,SEC24B,SERINC3,SETD2,SFT2D2,SIRT3,SLC16A10,SLC25A26,SLC35D2,SLC38A1,SLC44A2,STX17,STXBP5L,TBC1D22A,TIMM23B,TNKS,TRAM1,TSNAX,UEVLD,USO1,VPS13A,VPS50	42.67	0.01941	0.292979
GO:0009223	pyrimidine deoxyribonucleotide catabolic...	Biological Process	11	2	TDG,UNG	0.22	0.0197	0.292979
GO:0060148	positive regulation of posttranscription...	Biological Process	11	2	PUM1,PUM2	0.22	0.0197	0.292979
GO:0060211	regulation of nuclear-transcribed mRNA p...	Biological Process	11	2	CPEB3,TNRC6C	0.22	0.0197	0.292979
GO:0060213	positive regulation of nuclear-transcrib...	Biological Process	11	2	CPEB3,TNRC6C	0.22	0.0197	0.292979
GO:0032106	positive regulation of response to extra...	Biological Process	29	3	ATG7,DCN,SQSTM1	0.58	0.02005	0.292979
GO:0032109	positive regulation of response to nutri...	Biological Process	29	3	ATG7,DCN,SQSTM1	0.58	0.02005	0.292979
GO:0000409	regulation of transcription by galactose	Biological Process	1	1	NCOA1	0.02	0.02013	0.292979
GO:0000411	positive regulation of transcription by ...	Biological Process	1	1	NCOA1	0.02	0.02013	0.292979
GO:0000431	regulation of transcription from RNA pol...	Biological Process	1	1	NCOA1	0.02	0.02013	0.292979
GO:0000435	positive regulation of transcription fro...	Biological Process	1	1	NCOA1	0.02	0.02013	0.292979
GO:0000495	box H/ACA snoRNA 3-end processing	Biological Process	1	1	DKC1	0.02	0.02013	0.292979
GO:0007037	vacuolar phosphate transport	Biological Process	1	1	FGFR1	0.02	0.02013	0.292979
GO:0015805	S-adenosyl-L-methionine transport	Biological Process	1	1	SLC25A26	0.02	0.02013	0.292979
GO:0022012	subpallium cell proliferation in forebra...	Biological Process	1	1	GLI3	0.02	0.02013	0.292979
GO:0022018	lateral ganglionic eminence cell prolife...	Biological Process	1	1	GLI3	0.02	0.02013	0.292979
GO:0032468	Golgi calcium ion homeostasis	Biological Process	1	1	ATP2C1	0.02	0.02013	0.292979
GO:0033979	box H/ACA snoRNA metabolic process	Biological Process	1	1	DKC1	0.02	0.02013	0.292979
GO:0034721	histone H3-K4 demethylation, trimethyl-H...	Biological Process	1	1	KDM5B	0.02	0.02013	0.292979
GO:0034964	box H/ACA snoRNA processing	Biological Process	1	1	DKC1	0.02	0.02013	0.292979
GO:0035937	estrogen secretion	Biological Process	1	1	KDM5B	0.02	0.02013	0.292979
GO:0035938	estradiol secretion	Biological Process	1	1	KDM5B	0.02	0.02013	0.292979
GO:0039007	pronephric nephron morphogenesis	Biological Process	1	1	AHI1	0.02	0.02013	0.292979
GO:0039008	pronephric nephron tubule morphogenesis	Biological Process	1	1	AHI1	0.02	0.02013	0.292979
GO:0039022	pronephric duct development	Biological Process	1	1	AHI1	0.02	0.02013	0.292979
GO:0039023	pronephric duct morphogenesis	Biological Process	1	1	AHI1	0.02	0.02013	0.292979
GO:0039521	suppression by virus of host autophagy	Biological Process	1	1	ATG7	0.02	0.02013	0.292979
GO:0042628	mating plug formation	Biological Process	1	1	SERPINE2	0.02	0.02013	0.292979
GO:0044648	histone H3-K4 dimethylation	Biological Process	1	1	KMT2A	0.02	0.02013	0.292979
GO:0045297	post-mating behavior	Biological Process	1	1	SERPINE2	0.02	0.02013	0.292979
GO:0046360	2-oxobutyrate biosynthetic process	Biological Process	1	1	THNSL2	0.02	0.02013	0.292979
GO:0046361	2-oxobutyrate metabolic process	Biological Process	1	1	THNSL2	0.02	0.02013	0.292979
GO:0048033	heme o metabolic process	Biological Process	1	1	COX10	0.02	0.02013	0.292979
GO:0048034	heme O biosynthetic process	Biological Process	1	1	COX10	0.02	0.02013	0.292979
GO:0051228	mitotic spindle disassembly	Biological Process	1	1	SPAST	0.02	0.02013	0.292979
GO:0051230	spindle disassembly	Biological Process	1	1	SPAST	0.02	0.02013	0.292979
GO:0060366	lambdoid suture morphogenesis	Biological Process	1	1	GLI3	0.02	0.02013	0.292979
GO:0060367	sagittal suture morphogenesis	Biological Process	1	1	GLI3	0.02	0.02013	0.292979
GO:0060720	spongiotrophoblast cell proliferation	Biological Process	1	1	NRK	0.02	0.02013	0.292979
GO:0060721	regulation of spongiotrophoblast cell pr...	Biological Process	1	1	NRK	0.02	0.02013	0.292979
GO:0060722	cell proliferation involved in embryonic...	Biological Process	1	1	NRK	0.02	0.02013	0.292979
GO:0060723	regulation of cell proliferation involve...	Biological Process	1	1	NRK	0.02	0.02013	0.292979
GO:0060873	anterior semicircular canal development	Biological Process	1	1	GLI3	0.02	0.02013	0.292979
GO:0060875	lateral semicircular canal development	Biological Process	1	1	GLI3	0.02	0.02013	0.292979
GO:0061107	seminal vesicle development	Biological Process	1	1	SERPINE2	0.02	0.02013	0.292979
GO:0061108	seminal vesicle epithelium development	Biological Process	1	1	SERPINE2	0.02	0.02013	0.292979
GO:0070121	Kupffers vesicle development	Biological Process	1	1	AHI1	0.02	0.02013	0.292979
GO:0070202	regulation of establishment of protein l...	Biological Process	1	1	SPIDR	0.02	0.02013	0.292979
GO:0070640	vitamin D3 metabolic process	Biological Process	1	1	FGFR1	0.02	0.02013	0.292979
GO:0070899	mitochondrial tRNA wobble uridine modifi...	Biological Process	1	1	MTO1	0.02	0.02013	0.292979
GO:0072428	signal transduction involved in intra-S ...	Biological Process	1	1	CHEK2	0.02	0.02013	0.292979
GO:0097298	regulation of nucleus size	Biological Process	1	1	HP1BP3	0.02	0.02013	0.292979
GO:0097369	sodium ion import	Biological Process	1	1	SLC8A1	0.02	0.02013	0.292979
GO:1900139	negative regulation of arachidonic acid ...	Biological Process	1	1	PLA2R1	0.02	0.02013	0.292979
GO:1900170	negative regulation of glucocorticoid me...	Biological Process	1	1	CREBRF	0.02	0.02013	0.292979
GO:1900234	regulation of Kit signaling pathway	Biological Process	1	1	RABGEF1	0.02	0.02013	0.292979
GO:1900235	negative regulation of Kit signaling pat...	Biological Process	1	1	RABGEF1	0.02	0.02013	0.292979
GO:1900365	positive regulation of mRNA polyadenylat...	Biological Process	1	1	CPEB3	0.02	0.02013	0.292979
GO:1900383	regulation of synaptic plasticity by rec...	Biological Process	1	1	ANKS1B	0.02	0.02013	0.292979
GO:1901962	S-adenosyl-L-methionine transmembrane tr...	Biological Process	1	1	SLC25A26	0.02	0.02013	0.292979
GO:1902969	mitotic DNA replication	Biological Process	1	1	CHEK2	0.02	0.02013	0.292979
GO:1903463	regulation of mitotic cell cycle DNA rep...	Biological Process	1	1	CHEK2	0.02	0.02013	0.292979
GO:1903464	negative regulation of mitotic cell cycl...	Biological Process	1	1	CHEK2	0.02	0.02013	0.292979
GO:2000830	positive regulation of parathyroid hormo...	Biological Process	1	1	FGFR1	0.02	0.02013	0.292979
GO:2000861	regulation of estrogen secretion	Biological Process	1	1	KDM5B	0.02	0.02013	0.292979
GO:2000864	regulation of estradiol secretion	Biological Process	1	1	KDM5B	0.02	0.02013	0.292979
GO:2001025	positive regulation of response to drug	Biological Process	1	1	KMT2A	0.02	0.02013	0.292979
GO:2001040	positive regulation of cellular response...	Biological Process	1	1	KMT2A	0.02	0.02013	0.292979
GO:2001228	regulation of response to gamma radiatio...	Biological Process	1	1	PRKDC	0.02	0.02013	0.292979
GO:2001229	negative regulation of response to gamma...	Biological Process	1	1	PRKDC	0.02	0.02013	0.292979
GO:0009059	macromolecule biosynthetic process	Biological Process	4986	118	ADNP,AEBP2,AHI1,ALG9,ANKRD13C,APBB2,ASH1L,ASXL1,ATF1,ATF2,ATG7,ATRIP,ATXN1,ATXN3,BCAS3,BRWD1,CALCOCO1,CDK5RAP2,CHD2,CHD6,CHEK2,CNOT8,CPEB3,CPSF2,CREBRF,DCN,DENND4A,DKC1,DPY30,ERCC6,FBN1,FGFR1,FLI1,FOXK2,GABPA,GIGYF2,GLI3,GSPT1,GTF2A1L,GTF2F2,HP1BP3,KAT2B,KDM3B,KDM5B,KDM5C,KMT2A,KMT2C,LRP4,LRPPRC,MAN1A2,MAPK10,MCM9,MCMBP,MED13,MEF2A,MNAT1,MTDH,NCOA1,NFATC3,NFIC,NFYB,NUP133,NUP98,PCSK5,PDS5A,PHF20,…	100.35	0.02021	0.293081
GO:0016441	posttranscriptional gene silencing	Biological Process	52	4	CNOT8,PUM1,PUM2,TNRC6C	1.05	0.02045	0.294436
GO:0035194	posttranscriptional gene silencing by RN...	Biological Process	52	4	CNOT8,PUM1,PUM2,TNRC6C	1.05	0.02045	0.294436
GO:0032259	methylation	Biological Process	340	13	ASH1L,DPY30,GSPT1,ICMT,KMT2A,KMT2C,METTL15,METTL8,MTO1,MTR,PRDM6,SETD2,SPI1	6.84	0.02067	0.296541
GO:0034645	cellular macromolecule biosynthetic proc...	Biological Process	4803	114	ADNP,AEBP2,AHI1,ALG9,APBB2,ASH1L,ASXL1,ATF1,ATF2,ATG7,ATRIP,ATXN1,ATXN3,BCAS3,BRWD1,CALCOCO1,CDK5RAP2,CHD2,CHD6,CHEK2,CNOT8,CPEB3,CPSF2,CREBRF,DCN,DENND4A,DKC1,DPY30,ERCC6,FBN1,FGFR1,FLI1,FOXK2,GABPA,GIGYF2,GLI3,GSPT1,GTF2A1L,GTF2F2,HP1BP3,KAT2B,KDM3B,KDM5B,KDM5C,KMT2A,KMT2C,LRP4,LRPPRC,MAN1A2,MAPK10,MCM9,MCMBP,MED13,MEF2A,MNAT1,MTDH,NCOA1,NFATC3,NFIC,NFYB,NUP133,NUP98,PDS5A,PHF20,PICALM,PIF1,PIG…	96.67	0.02108	0.301346
GO:0051641	cellular localization	Biological Process	2942	74	ACACA,ACAP2,AHI1,ANKRD13C,ANKS1B,APPBP2,ATP2C1,ATXN1,BBS1,BCAS3,C2CD5,CBLB,CDC23,CDK5RAP2,CEP112,CLASP1,COX18,CPSF2,CSE1L,CYB5R4,DENND2A,DPY30,FAF1,FAM126A,FCHO2,FGFR1,GLI3,HOOK3,ICMT,ITGAL,ITSN1,KDM5B,KLC1,KPNA4,LRP4,LRPPRC,LTBP4,LYST,MARK2,MEF2A,MERTK,NBAS,NUP133,NUP98,OBSL1,PCSK5,PEX5L,PICALM,PMM2,PPP6R3,RABGEF1,RAPGEF4,RHOT1,SCFD1,SEC24B,SERPINE2,SETD2,SIRT3,SLC8A1,SPAST,SPIDR,SQSTM1,STX17,ST…	59.21	0.02135	0.304124
GO:0006397	mRNA processing	Biological Process	491	17	AQR,CELF2,CLNS1A,CNOT8,CPEB3,CPSF2,DHX9,GTF2F2,HNRNPM,LUC7L,MNAT1,QKI,RBM39,RBM5,RNGTT,TNRC6C,TSEN2	9.88	0.02155	0.304811
GO:0007507	heart development	Biological Process	491	17	ADAM19,AHI1,ASXL1,ATF2,FBN1,FGFR1,GLI3,MEF2A,MNAT1,NDUFV2,OBSL1,PCSK5,PRKDC,SEC24B,SETD2,SLC8A1,STK3	9.88	0.02155	0.304811
GO:0034249	negative regulation of cellular amide me...	Biological Process	138	7	CNOT8,CPEB3,GIGYF2,PUM1,PUM2,QKI,TNRC6C	2.78	0.0217	0.305792
GO:2000112	regulation of cellular macromolecule bio...	Biological Process	3868	94	ADNP,AEBP2,AHI1,APBB2,ASH1L,ASXL1,ATF1,ATF2,ATXN1,ATXN3,BCAS3,BRWD1,CALCOCO1,CDK5RAP2,CHD2,CHD6,CHEK2,CNOT8,CPEB3,CREBRF,DCN,DENND4A,DKC1,DPY30,ERCC6,FBN1,FGFR1,FLI1,FOXK2,GABPA,GIGYF2,GLI3,GTF2A1L,GTF2F2,HP1BP3,KAT2B,KDM3B,KDM5B,KDM5C,KMT2A,KMT2C,LRP4,LRPPRC,MAPK10,MED13,MEF2A,MNAT1,MTDH,NCOA1,NFATC3,NFIC,NFYB,NUP133,PDS5A,PHF20,PICALM,PIF1,PRDM6,PRKDC,PUM1,PUM2,QKI,RBM39,RFX2,RNF4,SAP130,SCAI,S…	77.85	0.02184	0.305792
GO:0006482	protein demethylation	Biological Process	30	3	KDM3B,KDM5B,KDM5C	0.6	0.02195	0.305792
GO:0008214	protein dealkylation	Biological Process	30	3	KDM3B,KDM5B,KDM5C	0.6	0.02195	0.305792
GO:0007010	cytoskeleton organization	Biological Process	1138	33	ABI1,ARHGAP26,ATP2C1,ATXN3,BCAS3,BRWD1,CCSER2,CDC42BPA,CDK5RAP2,CEP192,CHEK2,CLASP1,FARP2,FCHSD2,HAUS4,HOOK3,ITGB5,MARK2,MEF2A,NCKAP1,OBSL1,PLEKHH2,PRKG1,RASA1,RNF4,SDCCAG8,SENP6,SH3D19,SMC3,SPAST,TBCE,TNKS,ZMYM2	22.9	0.022	0.305792
GO:0006486	protein glycosylation	Biological Process	272	11	ADNP,ALG9,KAT2B,MAN1A2,PMM2,SIRT3,ST3GAL3,ST6GAL2,STT3A,TMEM59,TNKS	5.47	0.02225	0.30609
GO:0043413	macromolecule glycosylation	Biological Process	272	11	ADNP,ALG9,KAT2B,MAN1A2,PMM2,SIRT3,ST3GAL3,ST6GAL2,STT3A,TMEM59,TNKS	5.47	0.02225	0.30609
GO:0043414	macromolecule methylation	Biological Process	272	11	ASH1L,DPY30,GSPT1,ICMT,KMT2A,KMT2C,METTL15,MTO1,PRDM6,SETD2,SPI1	5.47	0.02225	0.30609
GO:0018022	peptidyl-lysine methylation	Biological Process	109	6	ASH1L,DPY30,KMT2A,KMT2C,PRDM6,SETD2	2.19	0.02285	0.309296
GO:0009056	catabolic process	Biological Process	3412	84	ABCA10,ACAP2,ADAL,AGAP1,ARHGAP26,ASAP2,ATG16L1,ATG7,ATP2C1,ATXN3,BCAS3,BCKDHB,BNIP2,CCZ1,CDC23,CHD2,CHD6,CHEK2,CNOT8,CPEB3,DCN,DDX10,DENND2A,DENND4A,DENND5B,DHX9,DOCK5,ERCC6,FAF1,FARP2,FGFR1,GARNL3,GDI2,GSPT1,HECTD1,HERC3,HERC5,ITSN1,LRPPRC,MARK2,MCCC1,MNAT1,MTDH,NBAS,PDE4B,PDE5A,PHKB,PIF1,PIK3CB,PMS2,POLDIP2,PRKG1,PSD3,PSMD13,RABGEF1,RAPGEF4,RASA1,RASGRF2,RGS22,RHOT1,RNF4,SERPINE2,SH3D19,SIPA1L2…	68.67	0.02304	0.309296
GO:0010810	regulation of cell-substrate adhesion	Biological Process	172	8	ABI3BP,ATXN3,BCAS3,CLASP1,DOCK5,NID1,PIK3CB,RASA1	3.46	0.02331	0.309296
GO:0006244	pyrimidine nucleotide catabolic process	Biological Process	12	2	TDG,UNG	0.24	0.02333	0.309296
GO:0009113	purine nucleobase biosynthetic process	Biological Process	12	2	ADAL,GMPS	0.24	0.02333	0.309296
GO:0010510	regulation of acetyl-CoA biosynthetic pr...	Biological Process	12	2	DLAT,PDHX	0.24	0.02333	0.309296
GO:0034111	negative regulation of homotypic cell-ce...	Biological Process	12	2	PRKG1,SERPINE2	0.24	0.02333	0.309296
GO:0039535	regulation of RIG-I signaling pathway	Biological Process	12	2	PUM1,PUM2	0.24	0.02333	0.309296
GO:0060977	coronary vasculature morphogenesis	Biological Process	12	2	SEC24B,SETD2	0.24	0.02333	0.309296
GO:0061158	3-UTR-mediated mRNA destabilization	Biological Process	12	2	CPEB3,QKI	0.24	0.02333	0.309296
GO:0090399	replicative senescence	Biological Process	12	2	CHEK2,PLA2R1	0.24	0.02333	0.309296
GO:0009896	positive regulation of catabolic process	Biological Process	347	13	ATG7,CDC23,CNOT8,CPEB3,DCN,MTDH,PIK3CB,PSMD13,SH3D19,SQSTM1,TMEM59,TNRC6C,ZC3HAV1	6.98	0.02393	0.315433
GO:0098751	bone cell development	Biological Process	31	3	ABI1,FBN1,FLI1	0.62	0.02395	0.315433
GO:0010556	regulation of macromolecule biosynthetic...	Biological Process	3980	96	ADNP,AEBP2,AHI1,ANKRD13C,APBB2,ASH1L,ASXL1,ATF1,ATF2,ATXN1,ATXN3,BCAS3,BRWD1,CALCOCO1,CDK5RAP2,CHD2,CHD6,CHEK2,CNOT8,CPEB3,CREBRF,DCN,DENND4A,DKC1,DPY30,ERCC6,FBN1,FGFR1,FLI1,FOXK2,GABPA,GIGYF2,GLI3,GTF2A1L,GTF2F2,HP1BP3,KAT2B,KDM3B,KDM5B,KDM5C,KMT2A,KMT2C,LRP4,LRPPRC,MAPK10,MED13,MEF2A,MNAT1,MTDH,NCOA1,NFATC3,NFIC,NFYB,NUP133,PDS5A,PHF20,PICALM,PIF1,PRDM6,PRKDC,PUM1,PUM2,QKI,RBM39,RFX2,RNF4,SAP1…	80.1	0.02457	0.322541
GO:0044249	cellular biosynthetic process	Biological Process	5936	137	ACACA,ADAL,ADGRD1,ADNP,AEBP2,AHI1,ALG9,APBB2,ASH1L,ASXL1,ATF1,ATF2,ATG7,ATRIP,ATXN1,ATXN3,BCAS3,BRWD1,CALCOCO1,CDK5RAP2,CHD2,CHD6,CHEK2,CNOT8,COX10,CPEB3,CPSF2,CREBRF,CTPS2,DCN,DCTD,DENND4A,DKC1,DLAT,DPY30,ERCC6,FBN1,FGFR1,FLI1,FOXK2,GABPA,GIGYF2,GLI3,GMPS,GPR161,GSPT1,GTF2A1L,GTF2F2,HP1BP3,KAT2B,KDM3B,KDM5B,KDM5C,KMT2A,KMT2C,LRP4,LRPPRC,MAN1A2,MAPK10,MCM9,MCMBP,MED13,MEF2A,MNAT1,MTDH,MTMR1,MTR,N…	119.47	0.02525	0.330388
GO:0070085	glycosylation	Biological Process	278	11	ADNP,ALG9,KAT2B,MAN1A2,PMM2,SIRT3,ST3GAL3,ST6GAL2,STT3A,TMEM59,TNKS	5.6	0.02559	0.33375
GO:1903047	mitotic cell cycle process	Biological Process	861	26	ATF2,CDC23,CDK5RAP2,CEP192,CHEK2,CLASP1,CNOT8,GIGYF2,GSPT1,HAUS4,MCMBP,MNAT1,NUP133,NUP98,OBSL1,PDS5A,PDS5B,PRKDC,PSMD13,RASA1,SDCCAG8,SMC3,SPAST,STAG1,TNKS,ZWILCH	17.33	0.02585	0.33605
GO:0006084	acetyl-CoA metabolic process	Biological Process	32	3	ACACA,DLAT,PDHX	0.64	0.02605	0.3362
GO:1903008	organelle disassembly	Biological Process	56	4	KLC1,MARK2,SPAST,SQSTM1	1.13	0.02608	0.3362
GO:0050657	nucleic acid transport	Biological Process	176	8	CPSF2,LRPPRC,NUP133,NUP98,PARP11,QKI,SETD2,TNKS	3.54	0.02628	0.3362
GO:0050658	RNA transport	Biological Process	176	8	CPSF2,LRPPRC,NUP133,NUP98,PARP11,QKI,SETD2,TNKS	3.54	0.02628	0.3362
GO:0051236	establishment of RNA localization	Biological Process	176	8	CPSF2,LRPPRC,NUP133,NUP98,PARP11,QKI,SETD2,TNKS	3.54	0.02628	0.3362
GO:0006086	acetyl-CoA biosynthetic process from pyr...	Biological Process	13	2	DLAT,PDHX	0.26	0.02721	0.344803
GO:0048268	clathrin coat assembly	Biological Process	13	2	FCHO2,PICALM	0.26	0.02721	0.344803
GO:0050812	regulation of acyl-CoA biosynthetic proc...	Biological Process	13	2	DLAT,PDHX	0.26	0.02721	0.344803
GO:0006278	RNA-dependent DNA biosynthetic process	Biological Process	57	4	DKC1,PIF1,PTGES3,TNKS	1.15	0.02762	0.348898
GO:0000289	nuclear-transcribed mRNA poly(A) tail sh...	Biological Process	33	3	CNOT8,CPEB3,TNRC6C	0.66	0.02823	0.354375
GO:0006370	7-methylguanosine mRNA capping	Biological Process	33	3	GTF2F2,MNAT1,RNGTT	0.66	0.02823	0.354375
GO:0043543	protein acylation	Biological Process	213	9	ATF2,KAT2B,KMT2A,NCOA1,PHF20,SAP130,SIRT3,SPI1,ZDHHC20	4.29	0.02882	0.360654
GO:0006461	protein complex assembly	Biological Process	1249	35	ACACA,ATF1,ATG16L1,CLASP1,COX10,COX18,DGKH,FAF1,FARP2,FCHO2,FCHSD2,GTF2F2,KCTD7,KMT2A,LRP4,MCCC1,MNAT1,NCKAP1,NDUFB2,NDUFV2,NUP98,PEX5L,PICALM,PPP6R3,PSMD13,RASA1,RNF4,SCFD1,SEC24B,SENP6,SPAST,SPIDR,SQSTM1,TFG,USO1	25.14	0.02911	0.363152
GO:0051345	positive regulation of hydrolase activit...	Biological Process	871	26	ACAP2,AGAP1,ARHGAP26,ASAP2,BCAS3,BNIP2,CCZ1,CYFIP2,DENND2A,DENND4A,DENND5B,DOCK5,FARP2,FGFR1,GARNL3,GDI2,ITSN1,PSD3,RABGEF1,RAPGEF4,RASA1,RASGRF2,RGS22,SIPA1L2,STXBP5L,TBC1D22A	17.53	0.02924	0.363644
GO:1901575	organic substance catabolic process	Biological Process	3080	76	ABCA10,ACAP2,ADAL,AGAP1,ARHGAP26,ASAP2,ATG7,ATP2C1,ATXN3,BCAS3,BCKDHB,BNIP2,CCZ1,CDC23,CHD2,CHD6,CHEK2,CNOT8,CPEB3,DCN,DDX10,DENND2A,DENND4A,DENND5B,DHX9,DOCK5,ERCC6,FAF1,FARP2,FGFR1,GARNL3,GDI2,GSPT1,HECTD1,HERC3,HERC5,ITSN1,LRPPRC,MCCC1,MNAT1,NBAS,PDE4B,PDE5A,PHKB,PIF1,PMS2,PRKG1,PSD3,PSMD13,RABGEF1,RAPGEF4,RASA1,RASGRF2,RGS22,RHOT1,RNF4,SERPINE2,SH3D19,SIPA1L2,SMURF2,SPAST,SQSTM1,STXBP5L,TBC1D…	61.99	0.02948	0.365215
GO:1901576	organic substance biosynthetic process	Biological Process	6014	138	ACACA,ADAL,ADGRD1,ADNP,AEBP2,AHI1,ALG9,ANKRD13C,APBB2,ASH1L,ASXL1,ATF1,ATF2,ATG7,ATRIP,ATXN1,ATXN3,BCAS3,BRWD1,CALCOCO1,CDK5RAP2,CHD2,CHD6,CHEK2,CNOT8,COX10,CPEB3,CPSF2,CREBRF,CTPS2,DCN,DCTD,DENND4A,DKC1,DLAT,DPY30,ERCC6,FBN1,FGFR1,FLI1,FOXK2,GABPA,GIGYF2,GLI3,GMPS,GPR161,GSPT1,GTF2A1L,GTF2F2,HP1BP3,KAT2B,KDM3B,KDM5B,KDM5C,KMT2A,KMT2C,LRP4,LRPPRC,MAN1A2,MAPK10,MCM9,MCMBP,MED13,MEF2A,MNAT1,MTDH,MT…	121.04	0.02963	0.365215
GO:0019098	reproductive behavior	Biological Process	86	5	CREBRF,KMT2A,NCOA1,NLGN4X,SERPINE2	1.73	0.02971	0.365215
GO:1901362	organic cyclic compound biosynthetic pro...	Biological Process	4435	105	ACACA,ADAL,ADGRD1,ADNP,AEBP2,AHI1,APBB2,ASH1L,ASXL1,ATF1,ATF2,ATXN1,ATXN3,BCAS3,BRWD1,CALCOCO1,CDK5RAP2,CHD2,CHD6,CHEK2,CNOT8,COX10,CPEB3,CPSF2,CREBRF,CTPS2,DCN,DCTD,DENND4A,DKC1,DPY30,ERCC6,FBN1,FGFR1,FLI1,FOXK2,GABPA,GLI3,GMPS,GPR161,GTF2A1L,GTF2F2,HP1BP3,KAT2B,KDM3B,KDM5B,KDM5C,KMT2A,KMT2C,LRP4,LRPPRC,MAPK10,MED13,MEF2A,MNAT1,MTDH,NCOA1,NFATC3,NFIC,NFYB,NUP133,NUP98,PANK2,PANK3,PHF20,PICALM,PI…	89.26	0.02973	0.365215
GO:0009889	regulation of biosynthetic process	Biological Process	4200	100	ADGRD1,ADNP,AEBP2,AHI1,ANKRD13C,APBB2,ASH1L,ASXL1,ATF1,ATF2,ATXN1,ATXN3,BCAS3,BRWD1,CALCOCO1,CDK5RAP2,CHD2,CHD6,CHEK2,CNOT8,CPEB3,CREBRF,DCN,DENND4A,DKC1,DLAT,DPY30,ERCC6,FBN1,FGFR1,FLI1,FOXK2,GABPA,GIGYF2,GLI3,GPR161,GTF2A1L,GTF2F2,HP1BP3,KAT2B,KDM3B,KDM5B,KDM5C,KMT2A,KMT2C,LRP4,LRPPRC,MAPK10,MED13,MEF2A,MNAT1,MTDH,NCOA1,NFATC3,NFIC,NFYB,NUP133,PDHX,PDS5A,PHF20,PICALM,PIF1,PRDM6,PRKDC,PUM1,PUM2,…	84.53	0.0299	0.366184
GO:0006473	protein acetylation	Biological Process	181	8	ATF2,KAT2B,KMT2A,NCOA1,PHF20,SAP130,SIRT3,SPI1	3.64	0.03035	0.36723
GO:0019220	regulation of phosphate metabolic proces...	Biological Process	2087	54	ABI1,ACAP2,ADGRD1,ADNP,AGAP1,ARHGAP26,ASAP2,ASH1L,BCAS3,BNIP2,CBLB,CCZ1,CEP192,CHEK2,CNTN1,DCN,DENND2A,DENND4A,DENND5B,DOCK5,ERCC6,FAF1,FARP2,FGFR1,GARNL3,GDI2,GPR161,HERC5,ITSN1,KAT2B,LRP4,MAPK10,MARK2,MNAT1,NRK,PDE5A,PDGFD,PIK3CB,PPP6R3,PRKACB,PRKDC,PRKG1,PSD3,RABGEF1,RAPGEF4,RASA1,RASGRF2,RGS22,SIPA1L2,SIRT3,SQSTM1,STK3,STXBP5L,TBC1D22A	42	0.03067	0.36723
GO:0072583	clathrin-dependent endocytosis	Biological Process	59	4	FCHO2,ITSN1,PICALM,PIK3CB	1.19	0.03086	0.36723
GO:0006768	biotin metabolic process	Biological Process	14	2	ACACA,MCCC1	0.28	0.03133	0.36723
GO:0018410	C-terminal protein amino acid modificati...	Biological Process	14	2	ATG7,ICMT	0.28	0.03133	0.36723
GO:0039531	regulation of viral-induced cytoplasmic ...	Biological Process	14	2	PUM1,PUM2	0.28	0.03133	0.36723
GO:0051382	kinetochore assembly	Biological Process	14	2	RNF4,SENP6	0.28	0.03133	0.36723
GO:0097090	presynaptic membrane organization	Biological Process	14	2	LRP4,NLGN4X	0.28	0.03133	0.36723
GO:0031326	regulation of cellular biosynthetic proc...	Biological Process	4161	99	ADGRD1,ADNP,AEBP2,AHI1,APBB2,ASH1L,ASXL1,ATF1,ATF2,ATXN1,ATXN3,BCAS3,BRWD1,CALCOCO1,CDK5RAP2,CHD2,CHD6,CHEK2,CNOT8,CPEB3,CREBRF,DCN,DENND4A,DKC1,DLAT,DPY30,ERCC6,FBN1,FGFR1,FLI1,FOXK2,GABPA,GIGYF2,GLI3,GPR161,GTF2A1L,GTF2F2,HP1BP3,KAT2B,KDM3B,KDM5B,KDM5C,KMT2A,KMT2C,LRP4,LRPPRC,MAPK10,MED13,MEF2A,MNAT1,MTDH,NCOA1,NFATC3,NFIC,NFYB,NUP133,PDHX,PDS5A,PHF20,PICALM,PIF1,PRDM6,PRKDC,PUM1,PUM2,QKI,RBM39…	83.75	0.03136	0.36723
GO:0031023	microtubule organizing center organizati...	Biological Process	118	6	BCAS3,CDK5RAP2,CEP192,CLASP1,HAUS4,SDCCAG8	2.37	0.03209	0.36723
GO:0070925	organelle assembly	Biological Process	594	19	AHI1,ATG16L1,BBS1,CDK5RAP2,CEP192,CHEK2,CLASP1,CLUAP1,FARP2,HAUS4,MEF2A,OBSL1,PUM2,RFX2,RNF4,SCLT1,SENP6,STX17,TNKS	11.96	0.03209	0.36723
GO:0016573	histone acetylation	Biological Process	150	7	ATF2,KAT2B,KMT2A,NCOA1,PHF20,SAP130,SPI1	3.02	0.03224	0.36723
GO:0006487	protein N-linked glycosylation	Biological Process	88	5	MAN1A2,PMM2,ST3GAL3,ST6GAL2,STT3A	1.77	0.03237	0.36723
GO:0043170	macromolecule metabolic process	Biological Process	9043	199	ABI1,ACACA,ADAM19,ADNP,AEBP2,AHI1,ALG9,ANKRD13C,APBB2,AQR,ASH1L,ASPHD1,ASXL1,ATF1,ATF2,ATG7,ATRIP,ATXN1,ATXN3,BCAS3,BRWD1,C7,CALCOCO1,CAMLG,CAPN7,CBLB,CDC23,CDC42BPA,CDK5RAP2,CELF2,CHD2,CHD6,CHEK2,CLK1,CLNS1A,CNOT8,CNTN1,CPEB3,CPSF2,CREBRF,CRIM1,CYFIP2,DCN,DDX10,DENND4A,DHX9,DKC1,DPP8,DPY30,ERCC6,ERP44,FAF1,FBN1,FGFR1,FKBP5,FLI1,FOXK2,FPGT-TNNI3K,GABPA,GIGYF2,GLI3,GRK4,GSPT1,GTF2A1L,GTF2F2,HECTD1…	182	0.03241	0.36723
GO:0051568	histone H3-K4 methylation	Biological Process	60	4	ASH1L,DPY30,KMT2A,KMT2C	1.21	0.03255	0.36723
GO:0070988	demethylation	Biological Process	60	4	KDM3B,KDM5B,KDM5C,TDG	1.21	0.03255	0.36723
GO:0051173	positive regulation of nitrogen compound...	Biological Process	1696	45	ADGRD1,ADNP,AHI1,ASH1L,ASXL1,ATF1,ATF2,BCAS3,CALCOCO1,CDK5RAP2,CHD6,CHEK2,CNOT8,CPEB3,DCN,DKC1,ERCC6,FLI1,FOXK2,GABPA,GLI3,GPR161,GTF2F2,KAT2B,KMT2A,MED13,MEF2A,MNAT1,NCOA1,NFATC3,NFIC,NFYB,PICALM,PRKDC,RNF4,SPI1,SPIDR,SQSTM1,STAG1,TASP1,TNKS,TNRC6C,UNG,ZC3HAV1,ZNF516	34.13	0.03283	0.36723
GO:0030219	megakaryocyte differentiation	Biological Process	35	3	ABI1,FLI1,GABPA	0.7	0.0329	0.36723
GO:0042455	ribonucleoside biosynthetic process	Biological Process	119	6	ACACA,ADAL,CTPS2,GMPS,PANK2,PANK3	2.4	0.03325	0.36723
GO:0045184	establishment of protein localization	Biological Process	1923	50	AGAP1,APPBP2,ATG16L1,ATG7,BBS1,BCAS3,C2CD5,CBLB,COX18,CPSF2,CSE1L,CYB5R4,DENND2A,FAF1,FAM126A,GDI2,GLI3,HOOK3,ICMT,KLC1,KPNA4,LYST,NBAS,NUP133,NUP98,PARP11,PCSK5,PEX5L,PMM2,RABGEF1,RAPGEF4,SCFD1,SEC24B,SETD2,SFT2D2,SIRT3,SPIDR,STX17,STXBP5L,TBC1D22A,TIMM23B,TMEM59,TNKS,TRAM1,TSNAX,TTC7B,UEVLD,USO1,VPS13A,VPS50	38.7	0.03439	0.36723
GO:0006298	mismatch repair	Biological Process	36	3	PMS2,SETD2,TDG	0.72	0.03537	0.36723
GO:0010559	regulation of glycoprotein biosynthetic ...	Biological Process	36	3	ADNP,KAT2B,TMEM59	0.72	0.03537	0.36723
GO:0016239	positive regulation of macroautophagy	Biological Process	36	3	ATG7,DCN,SQSTM1	0.72	0.03537	0.36723
GO:0071702	organic substance transport	Biological Process	2513	63	ABCA10,ACACA,AGAP1,APPBP2,ATG16L1,ATG7,BBS1,BCAS3,C2CD5,CBLB,COX18,CPSF2,CSE1L,CYB5R4,DENND2A,ESYT2,FAF1,GDI2,GLI3,HOOK3,ICMT,KDM5B,KLC1,KPNA4,LRPPRC,LTBP4,LYST,NBAS,NCOA1,NUP133,NUP98,OSBPL1A,PARP11,PCSK5,PEX5L,PLA2R1,PMM2,QKI,RABGEF1,RAPGEF4,SCFD1,SEC24B,SERINC3,SETD2,SFT2D2,SIRT3,SLC16A10,SLC25A26,SLC2A9,SLC35D2,SLC38A1,SLC44A2,STX17,STXBP5L,TBC1D22A,TIMM23B,TNKS,TRAM1,TSNAX,UEVLD,USO1,VPS13A,…	50.58	0.03564	0.36723
GO:0006388	tRNA splicing, via endonucleolytic cleav...	Biological Process	15	2	TSEN2,ZBTB8OS	0.3	0.03568	0.36723
GO:0006999	nuclear pore organization	Biological Process	15	2	NUP133,NUP98	0.3	0.03568	0.36723
GO:0016446	somatic hypermutation of immunoglobulin ...	Biological Process	15	2	PMS2,UNG	0.3	0.03568	0.36723
GO:0035855	megakaryocyte development	Biological Process	15	2	ABI1,FLI1	0.3	0.03568	0.36723
GO:0039529	RIG-I signaling pathway	Biological Process	15	2	PUM1,PUM2	0.3	0.03568	0.36723
GO:0043970	histone H3-K9 acetylation	Biological Process	15	2	KAT2B,KMT2A	0.3	0.03568	0.36723
GO:0060255	regulation of macromolecule metabolic pr...	Biological Process	5808	133	ABI1,ADNP,AEBP2,AHI1,ANKRD13C,APBB2,ASH1L,ASXL1,ATF1,ATF2,ATG7,ATXN1,ATXN3,BCAS3,BRWD1,C7,CALCOCO1,CBLB,CDC23,CDK5RAP2,CHD2,CHD6,CHEK2,CLK1,CNOT8,CNTN1,CPEB3,CREBRF,CRIM1,CYFIP2,DCN,DENND4A,DHX9,DKC1,DPY30,ERCC6,FAF1,FBN1,FGFR1,FLI1,FOXK2,GABPA,GIGYF2,GLI3,GSPT1,GTF2A1L,GTF2F2,HERC5,HP1BP3,KAT2B,KDM3B,KDM5B,KDM5C,KMT2A,KMT2C,LRP4,LRPPRC,LTBP4,MAPK10,MARK2,MED13,MEF2A,MNAT1,MTDH,NBAS,NCOA1,NFATC3,…	116.89	0.03579	0.36723
GO:0043966	histone H3 acetylation	Biological Process	62	4	KAT2B,KMT2A,SAP130,SPI1	1.25	0.03611	0.36723
GO:0043967	histone H4 acetylation	Biological Process	62	4	KMT2A,NCOA1,PHF20,SPI1	1.25	0.03611	0.36723
GO:0006275	regulation of DNA replication	Biological Process	154	7	ATF1,CHEK2,DKC1,PDS5A,PIF1,SMC3,TNKS	3.1	0.03641	0.36723
GO:0021915	neural tube development	Biological Process	154	7	GLI3,GPR161,NUP133,PRKACB,SEC24B,SETD2,STK3	3.1	0.03641	0.36723
GO:1903311	regulation of mRNA metabolic process	Biological Process	122	6	CNOT8,CPEB3,NBAS,RBM5,TNRC6C,ZC3HAV1	2.46	0.03687	0.36723
GO:2001141	regulation of RNA biosynthetic process	Biological Process	3532	85	ADNP,AEBP2,AHI1,APBB2,ASH1L,ASXL1,ATF1,ATF2,ATXN1,ATXN3,BCAS3,BRWD1,CALCOCO1,CDK5RAP2,CHD2,CHD6,CHEK2,CNOT8,CPEB3,CREBRF,DCN,DENND4A,DPY30,ERCC6,FBN1,FGFR1,FLI1,FOXK2,GABPA,GLI3,GTF2A1L,GTF2F2,HP1BP3,KAT2B,KDM3B,KDM5B,KDM5C,KMT2A,KMT2C,LRP4,LRPPRC,MAPK10,MED13,MEF2A,MNAT1,MTDH,NCOA1,NFATC3,NFIC,NFYB,NUP133,PHF20,PICALM,PRDM6,PRKDC,RBM39,RFX2,RNF4,SAP130,SCAI,SETD2,SFMBT2,SMURF2,SPI1,SQSTM1,STAG1,…	71.09	0.03687	0.36723
GO:0042886	amide transport	Biological Process	1843	48	AGAP1,APPBP2,ATG16L1,ATG7,BBS1,BCAS3,C2CD5,CBLB,COX18,CPSF2,CSE1L,CYB5R4,DENND2A,FAF1,GDI2,GLI3,HOOK3,ICMT,KLC1,KPNA4,LTBP4,LYST,NBAS,NUP133,NUP98,PARP11,PCSK5,PEX5L,PMM2,RABGEF1,RAPGEF4,SCFD1,SEC24B,SETD2,SFT2D2,SIRT3,SLC38A1,STX17,STXBP5L,TBC1D22A,TIMM23B,TNKS,TRAM1,TSNAX,UEVLD,USO1,VPS13A,VPS50	37.09	0.03696	0.36723
GO:0044093	positive regulation of molecular functio...	Biological Process	1756	46	ABI1,ACAP2,ADGRD1,ADNP,AGAP1,ARHGAP26,ASAP2,ATF2,BCAS3,BNIP2,CCZ1,CDC23,CYFIP2,DENND2A,DENND4A,DENND5B,DKC1,DOCK5,ERCC6,FARP2,FGFR1,GARNL3,GDI2,ITSN1,KMT2A,MAPK10,MARK2,MTDH,NRK,PDE5A,PDGFD,PIK3CB,PRKACB,PSD3,PSMD13,RABGEF1,RAPGEF4,RASA1,RASGRF2,RGS22,SIPA1L2,STK3,STXBP5L,TBC1D22A,TNKS,UBA2	35.34	0.0375	0.36723
GO:0018393	internal peptidyl-lysine acetylation	Biological Process	155	7	ATF2,KAT2B,KMT2A,NCOA1,PHF20,SAP130,SPI1	3.12	0.0375	0.36723
GO:0016358	dendrite development	Biological Process	189	8	ABI1,CPEB3,LRP4,MEF2A,OBSL1,PICALM,PRKG1,RTN4IP1	3.8	0.03774	0.36723
GO:0048536	spleen development	Biological Process	37	3	KMT2A,PRKDC,RC3H2	0.74	0.03793	0.36723
GO:1903018	regulation of glycoprotein metabolic pro...	Biological Process	37	3	ADNP,KAT2B,TMEM59	0.74	0.03793	0.36723
GO:0007052	mitotic spindle organization	Biological Process	92	5	CHEK2,CLASP1,SMC3,SPAST,TNKS	1.85	0.03813	0.36723
GO:1902850	microtubule cytoskeleton organization in...	Biological Process	92	5	CHEK2,CLASP1,SMC3,SPAST,TNKS	1.85	0.03813	0.36723
GO:0006403	RNA localization	Biological Process	190	8	CPSF2,LRPPRC,NUP133,NUP98,PARP11,QKI,SETD2,TNKS	3.82	0.03874	0.36723
GO:0006355	regulation of transcription, DNA-templat...	Biological Process	3494	84	ADNP,AEBP2,AHI1,APBB2,ASH1L,ASXL1,ATF1,ATF2,ATXN1,ATXN3,BCAS3,BRWD1,CALCOCO1,CDK5RAP2,CHD2,CHD6,CHEK2,CNOT8,CPEB3,CREBRF,DCN,DENND4A,DPY30,ERCC6,FBN1,FGFR1,FLI1,FOXK2,GABPA,GLI3,GTF2A1L,GTF2F2,HP1BP3,KAT2B,KDM3B,KDM5B,KDM5C,KMT2A,KMT2C,LRP4,LRPPRC,MAPK10,MED13,MEF2A,MNAT1,MTDH,NCOA1,NFATC3,NFIC,NFYB,NUP133,PHF20,PICALM,PRDM6,PRKDC,RBM39,RFX2,RNF4,SAP130,SCAI,SETD2,SFMBT2,SMURF2,SPI1,SQSTM1,STAG1,…	70.32	0.03886	0.36723
GO:1903506	regulation of nucleic acid-templated tra...	Biological Process	3495	84	ADNP,AEBP2,AHI1,APBB2,ASH1L,ASXL1,ATF1,ATF2,ATXN1,ATXN3,BCAS3,BRWD1,CALCOCO1,CDK5RAP2,CHD2,CHD6,CHEK2,CNOT8,CPEB3,CREBRF,DCN,DENND4A,DPY30,ERCC6,FBN1,FGFR1,FLI1,FOXK2,GABPA,GLI3,GTF2A1L,GTF2F2,HP1BP3,KAT2B,KDM3B,KDM5B,KDM5C,KMT2A,KMT2C,LRP4,LRPPRC,MAPK10,MED13,MEF2A,MNAT1,MTDH,NCOA1,NFATC3,NFIC,NFYB,NUP133,PHF20,PICALM,PRDM6,PRKDC,RBM39,RFX2,RNF4,SAP130,SCAI,SETD2,SFMBT2,SMURF2,SPI1,SQSTM1,STAG1,…	70.34	0.03909	0.36723
GO:0000961	negative regulation of mitochondrial RNA...	Biological Process	2	1	LRPPRC	0.04	0.03985	0.36723
GO:0000973	posttranscriptional tethering of RNA pol...	Biological Process	2	1	NUP98	0.04	0.03985	0.36723
GO:0002182	cytoplasmic translational elongation	Biological Process	2	1	CPEB3	0.04	0.03985	0.36723
GO:0002184	cytoplasmic translational termination	Biological Process	2	1	GSPT1	0.04	0.03985	0.36723
GO:0003032	detection of oxygen	Biological Process	2	1	CYB5R4	0.04	0.03985	0.36723
GO:0006481	C-terminal protein methylation	Biological Process	2	1	ICMT	0.04	0.03985	0.36723
GO:0006679	glucosylceramide biosynthetic process	Biological Process	2	1	UGCG	0.04	0.03985	0.36723
GO:0006784	heme a biosynthetic process	Biological Process	2	1	COX10	0.04	0.03985	0.36723
GO:0009088	threonine biosynthetic process	Biological Process	2	1	THNSL2	0.04	0.03985	0.36723
GO:0030860	regulation of polarized epithelial cell ...	Biological Process	2	1	AHI1	0.04	0.03985	0.36723
GO:0030862	positive regulation of polarized epithel...	Biological Process	2	1	AHI1	0.04	0.03985	0.36723
GO:0031081	nuclear pore distribution	Biological Process	2	1	NUP133	0.04	0.03985	0.36723
GO:0032472	Golgi calcium ion transport	Biological Process	2	1	ATP2C1	0.04	0.03985	0.36723
GO:0032510	endosome to lysosome transport via multi...	Biological Process	2	1	LYST	0.04	0.03985	0.36723
GO:0032915	positive regulation of transforming grow...	Biological Process	2	1	ATF2	0.04	0.03985	0.36723
GO:0033364	mast cell secretory granule organization	Biological Process	2	1	LYST	0.04	0.03985	0.36723
GO:0035607	fibroblast growth factor receptor signal...	Biological Process	2	1	FGFR1	0.04	0.03985	0.36723
GO:0035617	stress granule disassembly	Biological Process	2	1	KLC1	0.04	0.03985	0.36723
GO:0039019	pronephric nephron development	Biological Process	2	1	AHI1	0.04	0.03985	0.36723
GO:0039020	pronephric nephron tubule development	Biological Process	2	1	AHI1	0.04	0.03985	0.36723
GO:0039506	modulation by virus of host molecular fu...	Biological Process	2	1	ZC3HAV1	0.04	0.03985	0.36723
GO:0039507	suppression by virus of host molecular f...	Biological Process	2	1	ZC3HAV1	0.04	0.03985	0.36723
GO:0039519	modulation by virus of host autophagy	Biological Process	2	1	ATG7	0.04	0.03985	0.36723
GO:0043686	co-translational protein modification	Biological Process	2	1	STT3A	0.04	0.03985	0.36723
GO:0044210	de novo CTP biosynthetic process	Biological Process	2	1	CTPS2	0.04	0.03985	0.36723
GO:0046160	heme a metabolic process	Biological Process	2	1	COX10	0.04	0.03985	0.36723
GO:0048211	Golgi vesicle docking	Biological Process	2	1	USO1	0.04	0.03985	0.36723
GO:0048372	lateral mesodermal cell fate commitment	Biological Process	2	1	FGFR1	0.04	0.03985	0.36723
GO:0048377	lateral mesodermal cell fate specificati...	Biological Process	2	1	FGFR1	0.04	0.03985	0.36723
GO:0048378	regulation of lateral mesodermal cell fa...	Biological Process	2	1	FGFR1	0.04	0.03985	0.36723
GO:0051664	nuclear pore localization	Biological Process	2	1	NUP133	0.04	0.03985	0.36723
GO:0052056	negative regulation by symbiont of host ...	Biological Process	2	1	ZC3HAV1	0.04	0.03985	0.36723
GO:0071436	sodium ion export	Biological Process	2	1	SLC8A1	0.04	0.03985	0.36723
GO:0090214	spongiotrophoblast layer developmental g...	Biological Process	2	1	NRK	0.04	0.03985	0.36723
GO:0090285	negative regulation of protein glycosyla...	Biological Process	2	1	TMEM59	0.04	0.03985	0.36723
GO:0097111	endoplasmic reticulum-Golgi intermediate...	Biological Process	2	1	STX17	0.04	0.03985	0.36723
GO:0097198	histone H3-K36 trimethylation	Biological Process	2	1	SETD2	0.04	0.03985	0.36723
GO:0097338	response to clozapine	Biological Process	2	1	PRKACB	0.04	0.03985	0.36723
GO:1900169	regulation of glucocorticoid mediated si...	Biological Process	2	1	CREBRF	0.04	0.03985	0.36723
GO:1900247	regulation of cytoplasmic translational ...	Biological Process	2	1	CPEB3	0.04	0.03985	0.36723
GO:1900248	negative regulation of cytoplasmic trans...	Biological Process	2	1	CPEB3	0.04	0.03985	0.36723
GO:1901078	negative regulation of relaxation of mus...	Biological Process	2	1	PDE4B	0.04	0.03985	0.36723
GO:1901301	regulation of cargo loading into COPII-c...	Biological Process	2	1	SEC24B	0.04	0.03985	0.36723
GO:1901898	negative regulation of relaxation of car...	Biological Process	2	1	PDE4B	0.04	0.03985	0.36723
GO:2000439	positive regulation of monocyte extravas...	Biological Process	2	1	PDGFD	0.04	0.03985	0.36723
GO:2000828	regulation of parathyroid hormone secret...	Biological Process	2	1	FGFR1	0.04	0.03985	0.36723
GO:2001295	malonyl-CoA biosynthetic process	Biological Process	2	1	ACACA	0.04	0.03985	0.36723
GO:0008589	regulation of smoothened signaling pathw...	Biological Process	64	4	GLI3,GPR161,PRKACB,SERPINE2	1.29	0.03988	0.36723
GO:0000394	RNA splicing, via endonucleolytic cleava...	Biological Process	16	2	TSEN2,ZBTB8OS	0.32	0.04024	0.36723
GO:0002566	somatic diversification of immune recept...	Biological Process	16	2	PMS2,UNG	0.32	0.04024	0.36723
GO:0009219	pyrimidine deoxyribonucleotide metabolic...	Biological Process	16	2	TDG,UNG	0.32	0.04024	0.36723
GO:0010544	negative regulation of platelet activati...	Biological Process	16	2	PRKG1,SERPINE2	0.32	0.04024	0.36723
GO:0045932	negative regulation of muscle contractio...	Biological Process	16	2	PDE5A,PRKG1	0.32	0.04024	0.36723
GO:0051383	kinetochore organization	Biological Process	16	2	RNF4,SENP6	0.32	0.04024	0.36723
GO:0055003	cardiac myofibril assembly	Biological Process	16	2	MEF2A,OBSL1	0.32	0.04024	0.36723
GO:0060964	regulation of gene silencing by miRNA	Biological Process	16	2	PUM1,PUM2	0.32	0.04024	0.36723
GO:0090169	regulation of spindle assembly	Biological Process	16	2	RNF4,SENP6	0.32	0.04024	0.36723
GO:0090330	regulation of platelet aggregation	Biological Process	16	2	PRKG1,SERPINE2	0.32	0.04024	0.36723
GO:1900151	regulation of nuclear-transcribed mRNA c...	Biological Process	16	2	CPEB3,TNRC6C	0.32	0.04024	0.36723
GO:1900153	positive regulation of nuclear-transcrib...	Biological Process	16	2	CPEB3,TNRC6C	0.32	0.04024	0.36723
GO:2000104	negative regulation of DNA-dependent DNA...	Biological Process	16	2	CHEK2,SMC3	0.32	0.04024	0.36723
GO:0006284	base-excision repair	Biological Process	38	3	ERCC6,TDG,UNG	0.76	0.04059	0.36723
GO:0009452	7-methylguanosine RNA capping	Biological Process	38	3	GTF2F2,MNAT1,RNGTT	0.76	0.04059	0.36723
GO:0021532	neural tube patterning	Biological Process	38	3	GLI3,GPR161,PRKACB	0.76	0.04059	0.36723
GO:0033865	nucleoside bisphosphate metabolic proces...	Biological Process	38	3	ACACA,PANK2,PANK3	0.76	0.04059	0.36723
GO:0033875	ribonucleoside bisphosphate metabolic pr...	Biological Process	38	3	ACACA,PANK2,PANK3	0.76	0.04059	0.36723
GO:0034032	purine nucleoside bisphosphate metabolic...	Biological Process	38	3	ACACA,PANK2,PANK3	0.76	0.04059	0.36723
GO:0036260	RNA capping	Biological Process	38	3	GTF2F2,MNAT1,RNGTT	0.76	0.04059	0.36723
GO:0007030	Golgi organization	Biological Process	94	5	BCAS3,CLASP1,OBSL1,STX17,USO1	1.89	0.04123	0.372182
GO:1901564	organonitrogen compound metabolic proces...	Biological Process	3412	82	ABCA10,ACACA,ACAP2,ADAL,ADGRD1,ADNP,AGAP1,ARHGAP26,ASAP2,ATP2C1,BCAS3,BCKDHB,BNIP2,CCZ1,CHD2,CHD6,CNOT8,COX10,CPEB3,CTPS2,DCN,DCTD,DDX10,DENND2A,DENND4A,DENND5B,DHX9,DOCK5,ERCC6,FARP2,FGFR1,GARNL3,GDI2,GIGYF2,GMPS,GPR161,GSPT1,GSR,ITSN1,LRPPRC,MCCC1,MNAT1,MTO1,MTR,NDUFB2,NDUFV2,PANK2,PANK3,PCSK5,PDE4B,PDE5A,PIF1,PMS2,PRKG1,PRPSAP2,PSD3,PSMD13,PUM1,PUM2,QKI,RABGEF1,RAPGEF4,RASA1,RASGRF2,RGS22,RHOT…	68.67	0.04159	0.37459
GO:0016571	histone methylation	Biological Process	126	6	ASH1L,DPY30,KMT2A,KMT2C,PRDM6,SETD2	2.54	0.04209	0.378245
GO:0031589	cell-substrate adhesion	Biological Process	302	11	ABI3BP,ATXN3,BCAS3,CLASP1,DOCK5,ITGAL,ITGB5,MERTK,NID1,PIK3CB,RASA1	6.08	0.04267	0.382018
GO:0009058	biosynthetic process	Biological Process	6085	138	ACACA,ADAL,ADGRD1,ADNP,AEBP2,AHI1,ALG9,ANKRD13C,APBB2,ASH1L,ASXL1,ATF1,ATF2,ATG7,ATRIP,ATXN1,ATXN3,BCAS3,BRWD1,CALCOCO1,CDK5RAP2,CHD2,CHD6,CHEK2,CNOT8,COX10,CPEB3,CPSF2,CREBRF,CTPS2,DCN,DCTD,DENND4A,DKC1,DLAT,DPY30,ERCC6,FBN1,FGFR1,FLI1,FOXK2,GABPA,GIGYF2,GLI3,GMPS,GPR161,GSPT1,GTF2A1L,GTF2F2,HP1BP3,KAT2B,KDM3B,KDM5B,KDM5C,KMT2A,KMT2C,LRP4,LRPPRC,MAN1A2,MAPK10,MCM9,MCMBP,MED13,MEF2A,MNAT1,MTDH,MT…	122.47	0.0427	0.382018
GO:0051656	establishment of organelle localization	Biological Process	417	14	CDC23,CDK5RAP2,CLASP1,ITSN1,LRPPRC,PICALM,PPP6R3,RABGEF1,RHOT1,SCFD1,SEC24B,SPAST,TFG,USO1	8.39	0.04341	0.387507
GO:0006810	transport	Biological Process	4456	104	ABCA10,ABI1,ACACA,AGAP1,AHI1,APPBP2,ATG16L1,ATG7,ATP2C1,ATXN1,BBS1,BCAS3,C2CD5,CACHD1,CBLB,CD302,CLASP1,CLNS1A,CNTN1,COX10,COX18,CPSF2,CREBRF,CSE1L,CYB5R4,CYFIP2,DENND2A,DENND5B,DPY30,ESYT2,FAF1,FCHO2,FGFR1,GDI2,GLI3,GRK4,HOOK3,ICMT,ITGAL,ITSN1,KDM5B,KLC1,KMT2A,KPNA4,LRP4,LRPPRC,LTBP4,LYST,MERTK,NALCN,NBAS,NCKAP1,NCOA1,NUP133,NUP98,OSBPL1A,PARP11,PCSK5,PDE4B,PEX5L,PICALM,PIK3CB,PLA2R1,PMM2,PPP6R3…	89.68	0.04366	0.388874
GO:0015833	peptide transport	Biological Process	1820	47	AGAP1,APPBP2,ATG16L1,ATG7,BBS1,BCAS3,C2CD5,CBLB,COX18,CPSF2,CSE1L,CYB5R4,DENND2A,FAF1,GDI2,GLI3,HOOK3,ICMT,KLC1,KPNA4,LTBP4,LYST,NBAS,NUP133,NUP98,PARP11,PCSK5,PEX5L,PMM2,RABGEF1,RAPGEF4,SCFD1,SEC24B,SETD2,SFT2D2,SIRT3,STX17,STXBP5L,TBC1D22A,TIMM23B,TNKS,TRAM1,TSNAX,UEVLD,USO1,VPS13A,VPS50	36.63	0.04387	0.389019
GO:0035690	cellular response to drug	Biological Process	66	4	CHEK2,KMT2A,NCOA1,PDE4B	1.33	0.04387	0.389019
GO:0006475	internal protein amino acid acetylation	Biological Process	161	7	ATF2,KAT2B,KMT2A,NCOA1,PHF20,SAP130,SPI1	3.24	0.04452	0.393914
GO:0031442	positive regulation of mRNA 3-end proce...	Biological Process	17	2	CPEB3,TNRC6C	0.34	0.04501	0.396074
GO:0031573	intra-S DNA damage checkpoint	Biological Process	17	2	ATF2,CHEK2	0.34	0.04501	0.396074
GO:0034613	cellular protein localization	Biological Process	1513	40	ACAP2,AHI1,ANKRD13C,APPBP2,BBS1,BCAS3,C2CD5,CBLB,CLASP1,COX18,CPSF2,CSE1L,FAF1,FAM126A,FCHO2,GLI3,HOOK3,ICMT,ITGAL,KLC1,KPNA4,LRP4,NUP133,NUP98,OBSL1,PEX5L,PMM2,RABGEF1,SEC24B,SETD2,SPIDR,STX17,TBC1D22A,TIMM23B,TMEM59,TNKS,TRAM1,TTC7B,USO1,VPS13A	30.45	0.04506	0.396074
GO:0000278	mitotic cell cycle	Biological Process	951	27	ATF2,CDC23,CDK5RAP2,CEP192,CHEK2,CLASP1,CNOT8,GIGYF2,GSPT1,HAUS4,MCMBP,MNAT1,NUP133,NUP98,OBSL1,PDS5A,PDS5B,POLDIP2,PRKDC,PSMD13,RASA1,SDCCAG8,SMC3,SPAST,STAG1,TNKS,ZWILCH	19.14	0.04521	0.396525
GO:0061024	membrane organization	Biological Process	868	25	ATG7,BBS1,C2CD5,COX18,FAM126A,FCHO2,ITGAL,LRP4,NLGN4X,NUP133,NUP98,PARP11,PICALM,PPP6R3,RHOT1,SCFD1,SCLT1,SEC24B,SPAST,STX17,TBC1D22A,TFG,TMEM59,TTC7B,USO1	17.47	0.04589	0.399709
GO:0022037	metencephalon development	Biological Process	97	5	CNTN1,NCOA1,NLGN4X,SEC24B,SERPINE2	1.95	0.04615	0.399709
GO:0044773	mitotic DNA damage checkpoint	Biological Process	97	5	ATF2,CHEK2,CNOT8,GIGYF2,PRKDC	1.95	0.04615	0.399709
GO:0018279	protein N-linked glycosylation via aspar...	Biological Process	40	3	ST3GAL3,ST6GAL2,STT3A	0.81	0.04617	0.399709
GO:0043687	post-translational protein modification	Biological Process	40	3	ATG7,ICMT,STT3A	0.81	0.04617	0.399709
GO:0048286	lung alveolus development	Biological Process	40	3	ASXL1,MAN1A2,RC3H2	0.81	0.04617	0.399709
GO:0010467	gene expression	Biological Process	5328	122	ADNP,AEBP2,AHI1,APBB2,AQR,ASH1L,ASXL1,ATF1,ATF2,ATXN1,ATXN3,BCAS3,BRWD1,C7,CALCOCO1,CDK5RAP2,CELF2,CHD2,CHD6,CHEK2,CLK1,CLNS1A,CNOT8,CNTN1,CPEB3,CPSF2,CREBRF,CYFIP2,DCN,DENND4A,DHX9,DKC1,DPY30,ERCC6,FBN1,FGFR1,FLI1,FOXK2,GABPA,GIGYF2,GLI3,GSPT1,GTF2A1L,GTF2F2,HNRNPM,HP1BP3,KAT2B,KDM3B,KDM5B,KDM5C,KMT2A,KMT2C,LRP4,LRPPRC,LUC7L,MAPK10,MED13,MEF2A,METTL15,MNAT1,MTDH,MTO1,NBAS,NCOA1,NFATC3,NFIC,NFYB,…	107.23	0.04635	0.400321
GO:0050790	regulation of catalytic activity	Biological Process	2278	57	ABI1,ACAP2,ADGRD1,ADNP,AGAP1,ARHGAP26,ASAP2,BCAS3,BNIP2,CBLB,CCZ1,CDC23,CEP192,CRIM1,CYFIP2,DCN,DENND2A,DENND4A,DENND5B,DKC1,DOCK5,ERCC6,FAF1,FARP2,FGFR1,GARNL3,GDI2,HERC5,ITSN1,KAT2B,MAPK10,MARK2,MNAT1,NRK,PDE5A,PDGFD,PIF1,PIK3CB,PLA2R1,PPP6R3,PRKACB,PRKG1,PRPSAP2,PSD3,PSMD13,RABGEF1,RAPGEF4,RASA1,RASGRF2,RGS22,SERPINE2,SIPA1L2,STK3,STXBP5L,TBC1D22A,TNKS,UBA2	45.85	0.04644	0.400321
GO:0015031	protein transport	Biological Process	1785	46	AGAP1,APPBP2,ATG16L1,ATG7,BBS1,BCAS3,C2CD5,CBLB,COX18,CPSF2,CSE1L,CYB5R4,DENND2A,FAF1,GDI2,GLI3,HOOK3,ICMT,KLC1,KPNA4,LYST,NBAS,NUP133,NUP98,PARP11,PCSK5,PEX5L,PMM2,RABGEF1,RAPGEF4,SCFD1,SEC24B,SETD2,SFT2D2,SIRT3,STX17,STXBP5L,TBC1D22A,TIMM23B,TNKS,TRAM1,TSNAX,UEVLD,USO1,VPS13A,VPS50	35.93	0.0473	0.406226
GO:0010629	negative regulation of gene expression	Biological Process	1563	41	ADNP,AEBP2,ASXL1,ATF2,ATXN1,CNOT8,CPEB3,DPY30,FGFR1,GABPA,GIGYF2,GLI3,GSPT1,KDM5B,KDM5C,MEF2A,MTDH,NBAS,NFATC3,NFIC,NUP133,NUP98,PICALM,PRDM6,PUM1,PUM2,QKI,SAP130,SERPINE2,SFMBT2,SLIT3,SMURF2,SPI1,SQSTM1,TDG,TMEM59,TNRC6C,TSN,TSNAX,UBR2,ZC3HAV1	31.46	0.04735	0.406226
GO:0070727	cellular macromolecule localization	Biological Process	1520	40	ACAP2,AHI1,ANKRD13C,APPBP2,BBS1,BCAS3,C2CD5,CBLB,CLASP1,COX18,CPSF2,CSE1L,FAF1,FAM126A,FCHO2,GLI3,HOOK3,ICMT,ITGAL,KLC1,KPNA4,LRP4,NUP133,NUP98,OBSL1,PEX5L,PMM2,RABGEF1,SEC24B,SETD2,SPIDR,STX17,TBC1D22A,TIMM23B,TMEM59,TNKS,TRAM1,TTC7B,USO1,VPS13A	30.59	0.04781	0.406226
GO:0003333	amino acid transmembrane transport	Biological Process	98	5	ACACA,SERINC3,SLC16A10,SLC25A26,SLC38A1	1.97	0.04786	0.406226
GO:0009101	glycoprotein biosynthetic process	Biological Process	346	12	ADNP,ALG9,DCN,KAT2B,MAN1A2,PMM2,SIRT3,ST3GAL3,ST6GAL2,STT3A,TMEM59,TNKS	6.96	0.04806	0.406226
GO:0018196	peptidyl-asparagine modification	Biological Process	41	3	ST3GAL3,ST6GAL2,STT3A	0.83	0.0491	0.406226
GO:0046580	negative regulation of Ras protein signa...	Biological Process	41	3	RABGEF1,RASA1,SCAI	0.83	0.0491	0.406226
GO:0051972	regulation of telomerase activity	Biological Process	41	3	DKC1,PIF1,TNKS	0.83	0.0491	0.406226
GO:0001764	neuron migration	Biological Process	131	6	APBB2,FGFR1,MARK2,MDGA1,PRKG1,SDCCAG8	2.64	0.04924	0.406226
GO:0032446	protein modification by small protein co...	Biological Process	875	25	ATG7,CBLB,CDC23,HECTD1,HERC3,HERC5,LTN1,NUP133,NUP98,PSMD13,RABGEF1,RC3H2,RNF4,SENP6,SMC3,SMURF2,STAG1,TDG,TNKS,TTC3,TULP4,UBA2,UBE2D2,UBE3C,UBR2	17.61	0.04957	0.406226
GO:0009953	dorsal/ventral pattern formation	Biological Process	99	5	DSCAML1,GLI3,GPR161,LRP4,PRKACB	1.99	0.04962	0.406226
GO:0045333	cellular respiration	Biological Process	165	7	COX10,DLAT,ME3,NDUFB2,NDUFV2,PANK2,SIRT3	3.32	0.04963	0.406226
GO:0016071	mRNA metabolic process	Biological Process	667	20	AQR,CELF2,CLNS1A,CNOT8,CPEB3,CPSF2,DHX9,GSPT1,GTF2F2,HNRNPM,LUC7L,MNAT1,NBAS,QKI,RBM39,RBM5,RNGTT,TNRC6C,TSEN2,ZC3HAV1	13.42	0.04983	0.406226
GO:0070647	protein modification by small protein co...	Biological Process	1003	28	ASXL1,ATG7,ATXN3,CBLB,CDC23,HECTD1,HERC3,HERC5,LTN1,NUP133,NUP98,PSMD13,RABGEF1,RC3H2,RNF4,SENP6,SMC3,SMURF2,STAG1,TDG,TNKS,TTC3,TULP4,UBA2,UBE2D2,UBE3C,UBR2,USP42	20.19	0.0499	0.406226
GO:0002320	lymphoid progenitor cell differentiation	Biological Process	18	2	PRKDC,SPI1	0.36	0.04998	0.406226
GO:0006085	acetyl-CoA biosynthetic process	Biological Process	18	2	DLAT,PDHX	0.36	0.04998	0.406226
GO:0031112	positive regulation of microtubule polym...	Biological Process	18	2	CLASP1,SPAST	0.36	0.04998	0.406226
GO:0031114	regulation of microtubule depolymerizati...	Biological Process	18	2	CLASP1,SPAST	0.36	0.04998	0.406226
GO:0042762	regulation of sulfur metabolic process	Biological Process	18	2	DLAT,PDHX	0.36	0.04998	0.406226
GO:0046112	nucleobase biosynthetic process	Biological Process	18	2	ADAL,GMPS	0.36	0.04998	0.406226
GO:0048261	negative regulation of receptor-mediated...	Biological Process	18	2	PICALM,RABGEF1	0.36	0.04998	0.406226
GO:0048339	paraxial mesoderm development	Biological Process	18	2	FGFR1,NUP133	0.36	0.04998	0.406226
GO:0060117	auditory receptor cell development	Biological Process	18	2	FGFR1,SEC24B	0.36	0.04998	0.406226
GO:0060147	regulation of posttranscriptional gene s...	Biological Process	18	2	PUM1,PUM2	0.36	0.04998	0.406226
GO:0060966	regulation of gene silencing by RNA	Biological Process	18	2	PUM1,PUM2	0.36	0.04998	0.406226
GO:1901984	negative regulation of protein acetylati...	Biological Process	18	2	SIRT3,SPI1	0.36	0.04998	0.406226
GO:2000757	negative regulation of peptidyl-lysine a...	Biological Process	18	2	SIRT3,SPI1	0.36	0.04998	0.406226
GO:0043226	organelle	Cellular Component	12833	293	ABCA10,ABI1,ACACA,ACAP2,ADAM19,ADNP,AEBP2,AHI1,AKIRIN1,ALG9,ANKRD13C,ANKS1B,APBB2,APPBP2,AQR,ARHGAP26,ASAP2,ASH1L,ASXL1,ATF1,ATF2,ATG16L1,ATG7,ATP2C1,ATRIP,ATXN1,ATXN3,BBS1,BCAS3,BCKDHB,BNIP2,BRWD1,C2CD5,C7,CALCOCO1,CAMLG,CAPN7,CBLB,CCSER2,CCZ1,CDC23,CDC42BPA,CDK5RAP2,CELF2,CEP112,CEP128,CEP192,CGNL1,CHD2,CHD6,CHEK2,CLASP1,CLK1,CLNS1A,CLUAP1,CMTM3,CNOT8,CNTN1,COX10,COX18,CPEB3,CPSF2,CREBRF,CRIM1,…	246.05	5.2e-10	2.8e-07
GO:0043229	intracellular organelle	Cellular Component	11958	277	ABCA10,ABI1,ACACA,ACAP2,ADAM19,ADNP,AEBP2,AHI1,AKIRIN1,ALG9,ANKRD13C,ANKS1B,APBB2,APPBP2,AQR,ARHGAP26,ASAP2,ASH1L,ASXL1,ATF1,ATF2,ATG16L1,ATG7,ATP2C1,ATRIP,ATXN1,ATXN3,BBS1,BCAS3,BCKDHB,BNIP2,BRWD1,C2CD5,CALCOCO1,CAMLG,CAPN7,CBLB,CCSER2,CCZ1,CDC23,CDC42BPA,CDK5RAP2,CELF2,CEP112,CEP128,CEP192,CGNL1,CHD2,CHD6,CHEK2,CLASP1,CLK1,CLNS1A,CLUAP1,CMTM3,CNOT8,COX10,COX18,CPEB3,CPSF2,CREBRF,CSE1L,CTPS2,CYB…	229.27	3.2e-09	8.61e-07
GO:0044424	intracellular part	Cellular Component	13617	302	ABCA10,ABI1,ACACA,ACAP2,ADAL,ADAM19,ADNP,AEBP2,AGAP1,AHI1,AKIRIN1,ALG9,ANKRD13C,ANKS1B,APBB2,APPBP2,AQR,ARHGAP26,ASAP2,ASH1L,ASXL1,ATF1,ATF2,ATG16L1,ATG7,ATP2C1,ATRIP,ATXN1,ATXN3,BBS1,BCAS3,BCKDHB,BNIP2,BRWD1,C2CD5,CALCOCO1,CAMLG,CAPN7,CBLB,CCDC125,CCSER2,CCZ1,CD302,CDC23,CDC42BPA,CDK5RAP2,CELF2,CEP112,CEP128,CEP192,CGNL1,CHD2,CHD6,CHEK2,CLASP1,CLK1,CLNS1A,CLUAP1,CMTM3,CNOT8,COX10,COX18,CPEB3,CPS…	261.08	6.5e-09	1.17e-06
GO:0043231	intracellular membrane-bounded organelle	Cellular Component	11007	257	ABCA10,ABI1,ACACA,ACAP2,ADAM19,ADNP,AEBP2,AHI1,AKIRIN1,ALG9,ANKRD13C,ANKS1B,APBB2,APPBP2,AQR,ASAP2,ASH1L,ASXL1,ATF1,ATF2,ATG16L1,ATG7,ATP2C1,ATRIP,ATXN1,ATXN3,BBS1,BCAS3,BCKDHB,BNIP2,BRWD1,C2CD5,CALCOCO1,CAMLG,CAPN7,CBLB,CCZ1,CDC23,CDK5RAP2,CELF2,CHD2,CHD6,CHEK2,CLASP1,CLK1,CLNS1A,CLUAP1,CMTM3,CNOT8,COX10,COX18,CPEB3,CPSF2,CREBRF,CSE1L,CTPS2,CYB5R4,CYFIP2,DCN,DENND4A,DGKH,DHX9,DKC1,DLAT,DPP8,DPY3…	211.04	5.8e-08	7.42e-06
GO:0043227	membrane-bounded organelle	Cellular Component	12087	275	ABCA10,ABI1,ACACA,ACAP2,ADAM19,ADNP,AEBP2,AHI1,AKIRIN1,ALG9,ANKRD13C,ANKS1B,APBB2,APPBP2,AQR,ASAP2,ASH1L,ASXL1,ATF1,ATF2,ATG16L1,ATG7,ATP2C1,ATRIP,ATXN1,ATXN3,BBS1,BCAS3,BCKDHB,BNIP2,BRWD1,C2CD5,C7,CALCOCO1,CAMLG,CAPN7,CBLB,CCZ1,CDC23,CDC42BPA,CDK5RAP2,CELF2,CHD2,CHD6,CHEK2,CLASP1,CLK1,CLNS1A,CLUAP1,CMTM3,CNOT8,CNTN1,COX10,COX18,CPEB3,CPSF2,CREBRF,CRIM1,CSE1L,CTPS2,CYB5R4,CYFIP2,DCN,DCTD,DENND4A,…	231.75	6.9e-08	7.42e-06
GO:0044446	intracellular organelle part	Cellular Component	8218	204	ABI1,ACACA,ACAP2,AEBP2,AHI1,AKIRIN1,ALG9,ANKRD13C,ANKS1B,APPBP2,AQR,ASAP2,ASH1L,ASXL1,ATF1,ATF2,ATG16L1,ATG7,ATP2C1,ATRIP,ATXN1,ATXN3,BBS1,BCAS3,BCKDHB,BNIP2,BRWD1,C2CD5,CALCOCO1,CAPN7,CBLB,CCZ1,CDC23,CDC42BPA,CDK5RAP2,CEP112,CEP128,CEP192,CGNL1,CHD2,CHD6,CHEK2,CLASP1,CLNS1A,CLUAP1,CMTM3,COX10,COX18,CPSF2,CREBRF,CSE1L,CYB5R4,DCN,DGKH,DHX9,DKC1,DLAT,DPP8,DPY30,ERCC6,ERP44,ESYT2,FAF1,FKBP5,FOXK2,GA…	157.56	2.2e-07	1.77e-05
GO:0005622	intracellular	Cellular Component	13957	303	ABCA10,ABI1,ACACA,ACAP2,ADAL,ADAM19,ADNP,AEBP2,AGAP1,AHI1,AKIRIN1,ALG9,ANKRD13C,ANKS1B,APBB2,APPBP2,AQR,ARHGAP26,ASAP2,ASH1L,ASXL1,ATF1,ATF2,ATG16L1,ATG7,ATP2C1,ATRIP,ATXN1,ATXN3,BBS1,BCAS3,BCKDHB,BNIP2,BRWD1,C2CD5,CALCOCO1,CAMLG,CAPN7,CBLB,CCDC125,CCSER2,CCZ1,CD302,CDC23,CDC42BPA,CDK5RAP2,CELF2,CEP112,CEP128,CEP192,CGNL1,CHD2,CHD6,CHEK2,CLASP1,CLK1,CLNS1A,CLUAP1,CMTM3,CNOT8,COX10,COX18,CPEB3,CPS…	267.6	2.3e-07	1.77e-05
GO:0044428	nuclear part	Cellular Component	3909	115	ACACA,AEBP2,AKIRIN1,ANKS1B,AQR,ASH1L,ASXL1,ATF1,ATF2,ATRIP,ATXN1,ATXN3,BCAS3,BNIP2,BRWD1,CALCOCO1,CAPN7,CBLB,CDC23,CHD2,CHD6,CHEK2,CLNS1A,CLUAP1,CMTM3,CPSF2,CREBRF,CSE1L,DGKH,DHX9,DKC1,DPP8,DPY30,ERCC6,FAF1,FKBP5,FOXK2,GABPA,GLI3,GTF2A1L,GTF2F2,HNRNPM,KAT2B,KDM3B,KDM5B,KDM5C,KMT2A,KMT2C,KPNA4,LRPPRC,LUC7L,MAPK10,MCMBP,MED13,MEF2A,MNAT1,MTDH,NCOA1,NFATC3,NFIC,NFYB,NUP133,NUP98,OSBPL1A,PARP11,PDS5A…	74.95	3.2e-07	2.15e-05
GO:0044422	organelle part	Cellular Component	8328	205	ABI1,ACACA,ACAP2,AEBP2,AHI1,AKIRIN1,ALG9,ANKRD13C,ANKS1B,APPBP2,AQR,ASAP2,ASH1L,ASXL1,ATF1,ATF2,ATG16L1,ATG7,ATP2C1,ATRIP,ATXN1,ATXN3,BBS1,BCAS3,BCKDHB,BNIP2,BRWD1,C2CD5,CALCOCO1,CAPN7,CBLB,CCZ1,CDC23,CDC42BPA,CDK5RAP2,CEP112,CEP128,CEP192,CGNL1,CHD2,CHD6,CHEK2,CLASP1,CLNS1A,CLUAP1,CMTM3,COX10,COX18,CPSF2,CREBRF,CSE1L,CYB5R4,DCN,DGKH,DHX9,DKC1,DLAT,DPP8,DPY30,ERCC6,ERP44,ESYT2,FAF1,FKBP5,FOXK2,GA…	159.67	4.1e-07	2.45e-05
GO:0005654	nucleoplasm	Cellular Component	2994	92	AEBP2,AKIRIN1,ANKS1B,AQR,ASH1L,ATF1,ATF2,ATRIP,ATXN1,ATXN3,CAPN7,CBLB,CDC23,CHD2,CHD6,CHEK2,CLNS1A,CLUAP1,CPSF2,CREBRF,CSE1L,DHX9,DKC1,DPP8,DPY30,ERCC6,FKBP5,FOXK2,GABPA,GLI3,GTF2A1L,GTF2F2,HNRNPM,KAT2B,KDM3B,KDM5B,KDM5C,KMT2A,KMT2C,KPNA4,LRPPRC,MAPK10,MCMBP,MED13,MEF2A,MNAT1,MTDH,NCOA1,NFATC3,NFYB,NUP98,OSBPL1A,PDS5A,PDS5B,PHF20,PMS2,POLI,PPP6R3,PRKACB,PRKDC,PSMD13,PTGES3,RBM39,RBM5,RC3H2,RCL1,R…	57.4	1.3e-06	6.99e-05
GO:0005737	cytoplasm	Cellular Component	10523	243	ABI1,ACACA,ACAP2,ADAL,ADAM19,ADNP,AGAP1,AHI1,ALG9,ANKRD13C,ANKS1B,APBB2,APPBP2,ARHGAP26,ASAP2,ASH1L,ATF2,ATG16L1,ATG7,ATP2C1,ATXN1,ATXN3,BBS1,BCAS3,BCKDHB,BNIP2,BRWD1,C2CD5,CALCOCO1,CAMLG,CAPN7,CBLB,CCDC125,CCZ1,CD302,CDC23,CDC42BPA,CDK5RAP2,CELF2,CEP112,CEP128,CEP192,CHEK2,CLASP1,CLK1,CLNS1A,CMTM3,CNOT8,COX10,COX18,CPEB3,CREBRF,CSE1L,CTPS2,CYB5R4,CYFIP2,DCN,DCTD,DENND2A,DGKH,DHX9,DKC1,DLAT,DOCK5…	201.76	1.7e-06	7.62e-05
GO:0031981	nuclear lumen	Cellular Component	3541	104	ACACA,AEBP2,AKIRIN1,ANKS1B,AQR,ASH1L,ASXL1,ATF1,ATF2,ATRIP,ATXN1,ATXN3,BCAS3,BRWD1,CALCOCO1,CAPN7,CBLB,CDC23,CHD2,CHD6,CHEK2,CLNS1A,CLUAP1,CPSF2,CREBRF,CSE1L,DHX9,DKC1,DPP8,DPY30,ERCC6,FKBP5,FOXK2,GABPA,GLI3,GTF2A1L,GTF2F2,HNRNPM,KAT2B,KDM3B,KDM5B,KDM5C,KMT2A,KMT2C,KPNA4,LRPPRC,MAPK10,MCMBP,MED13,MEF2A,MNAT1,MTDH,NCOA1,NFATC3,NFIC,NFYB,NUP98,OSBPL1A,PDS5A,PDS5B,PHF20,PIF1,PIK3CB,PMS2,POLI,PPP6R3,…	67.89	1.7e-06	7.62e-05
GO:0005829	cytosol	Cellular Component	3339	96	ABI1,ACACA,ADAL,AHI1,ARHGAP26,ATG16L1,ATG7,ATXN3,BBS1,BNIP2,CBLB,CDC23,CDK5RAP2,CEP192,CLASP1,CLNS1A,CNOT8,CSE1L,CTPS2,CYFIP2,DCTD,DENND2A,DHX9,FAF1,FAM126A,FARP2,FGFR1,GDI2,GLI3,GMPS,GRK4,GSPT1,GSR,HAUS4,HERC5,HOOK3,ITSN1,KCTD7,KLC1,KPNA4,MAPK10,MCCC1,MEMO1,MTMR1,MTR,NBAS,NBEA,NCKAP1,NFATC3,NUP133,NUP98,PANK2,PDE4B,PDE5A,PDS5A,PDS5B,PHF20,PHKB,PIK3CB,PMM2,PPP6R3,PRKACB,PRKDC,PRKG1,PSMD13,PTGES3,…	64.02	1.3e-05	0.000538
GO:0031974	membrane-enclosed lumen	Cellular Component	4377	118	ACACA,AEBP2,AKIRIN1,ANKS1B,AQR,ASH1L,ASXL1,ATF1,ATF2,ATRIP,ATXN1,ATXN3,BCAS3,BCKDHB,BRWD1,CALCOCO1,CAPN7,CBLB,CDC23,CHD2,CHD6,CHEK2,CLNS1A,CLUAP1,CPSF2,CREBRF,CSE1L,DCN,DHX9,DKC1,DLAT,DPP8,DPY30,ERCC6,ERP44,FKBP5,FOXK2,GABPA,GLI3,GSR,GTF2A1L,GTF2F2,HNRNPM,KAT2B,KDM3B,KDM5B,KDM5C,KMT2A,KMT2C,KPNA4,LRPPRC,MAPK10,MCCC1,MCMBP,ME3,MED13,MEF2A,MNAT1,MTDH,NCOA1,NFATC3,NFIC,NFYB,NUP98,OSBPL1A,PANK2,PCSK5…	83.92	1.9e-05	0.000638875
GO:0043233	organelle lumen	Cellular Component	4377	118	ACACA,AEBP2,AKIRIN1,ANKS1B,AQR,ASH1L,ASXL1,ATF1,ATF2,ATRIP,ATXN1,ATXN3,BCAS3,BCKDHB,BRWD1,CALCOCO1,CAPN7,CBLB,CDC23,CHD2,CHD6,CHEK2,CLNS1A,CLUAP1,CPSF2,CREBRF,CSE1L,DCN,DHX9,DKC1,DLAT,DPP8,DPY30,ERCC6,ERP44,FKBP5,FOXK2,GABPA,GLI3,GSR,GTF2A1L,GTF2F2,HNRNPM,KAT2B,KDM3B,KDM5B,KDM5C,KMT2A,KMT2C,KPNA4,LRPPRC,MAPK10,MCCC1,MCMBP,ME3,MED13,MEF2A,MNAT1,MTDH,NCOA1,NFATC3,NFIC,NFYB,NUP98,OSBPL1A,PANK2,PCSK5…	83.92	1.9e-05	0.000638875
GO:0070013	intracellular organelle lumen	Cellular Component	4377	118	ACACA,AEBP2,AKIRIN1,ANKS1B,AQR,ASH1L,ASXL1,ATF1,ATF2,ATRIP,ATXN1,ATXN3,BCAS3,BCKDHB,BRWD1,CALCOCO1,CAPN7,CBLB,CDC23,CHD2,CHD6,CHEK2,CLNS1A,CLUAP1,CPSF2,CREBRF,CSE1L,DCN,DHX9,DKC1,DLAT,DPP8,DPY30,ERCC6,ERP44,FKBP5,FOXK2,GABPA,GLI3,GSR,GTF2A1L,GTF2F2,HNRNPM,KAT2B,KDM3B,KDM5B,KDM5C,KMT2A,KMT2C,KPNA4,LRPPRC,MAPK10,MCCC1,MCMBP,ME3,MED13,MEF2A,MNAT1,MTDH,NCOA1,NFATC3,NFIC,NFYB,NUP98,OSBPL1A,PANK2,PCSK5…	83.92	1.9e-05	0.000638875
GO:0005634	nucleus	Cellular Component	6835	165	ABI1,ACACA,ADNP,AEBP2,AKIRIN1,ANKS1B,APBB2,APPBP2,AQR,ASH1L,ASXL1,ATF1,ATF2,ATRIP,ATXN1,ATXN3,BCAS3,BNIP2,BRWD1,CALCOCO1,CAPN7,CBLB,CDC23,CELF2,CHD2,CHD6,CHEK2,CLK1,CLNS1A,CLUAP1,CMTM3,CNOT8,CPEB3,CPSF2,CREBRF,CSE1L,CYFIP2,DENND4A,DGKH,DHX9,DKC1,DPP8,DPY30,ERCC6,FAF1,FGFR1,FKBP5,FLI1,FOXK2,GABPA,GLI3,GTF2A1L,GTF2F2,HECTD1,HERC3,HERC5,HNRNPM,HP1BP3,KAT2B,KDM3B,KDM5B,KDM5C,KMT2A,KMT2C,KPNA4,LARP1B,…	131.05	9.7e-05	0.00306976
GO:0044444	cytoplasmic part	Cellular Component	7923	186	ABI1,ACACA,ACAP2,ADAL,ADAM19,AHI1,ALG9,ANKRD13C,APPBP2,ARHGAP26,ASAP2,ASH1L,ATF2,ATG16L1,ATG7,ATP2C1,ATXN3,BBS1,BCAS3,BCKDHB,BNIP2,C2CD5,CAMLG,CBLB,CCZ1,CD302,CDC23,CDK5RAP2,CEP128,CEP192,CHEK2,CLASP1,CLNS1A,CNOT8,COX10,COX18,CSE1L,CTPS2,CYB5R4,CYFIP2,DCN,DCTD,DENND2A,DGKH,DHX9,DLAT,DPY30,ERP44,ESYT2,FAF1,FAM126A,FARP2,FCHO2,FCHSD2,FGFR1,FKBP5,GDI2,GLI3,GMPS,GPR161,GRK4,GSPT1,GSR,HAUS4,HERC3,HERC…	151.91	0.00011	0.00328778
GO:0005694	chromosome	Cellular Component	874	33	ASH1L,ASXL1,ATF2,BCAS3,CALCOCO1,CHEK2,CLASP1,DPY30,GABPA,HP1BP3,KAT2B,KDM3B,LRPPRC,MCMBP,MEF2A,NCOA1,NUP133,NUP98,PDS5A,PDS5B,PIF1,PRKDC,PTGES3,SAP130,SETD2,SMC3,SPI1,SPIDR,STAG1,TNKS,UBR2,ZFR,ZWILCH	16.76	0.00017	0.00481368
GO:0000242	pericentriolar material	Cellular Component	18	4	CDK5RAP2,CEP192,HOOK3,TNKS	0.35	0.00033	0.008877
GO:0016234	inclusion body	Cellular Component	70	7	ATXN1,ATXN3,CCZ1,NUP98,PICALM,SFMBT2,SQSTM1	1.34	0.00038	0.00973524
GO:0044450	microtubule organizing center part	Cellular Component	152	10	AHI1,CDK5RAP2,CEP128,CEP192,CLASP1,HOOK3,PDE4B,SCLT1,SDCCAG8,TNKS	2.91	0.00071	0.0173627
GO:0044427	chromosomal part	Cellular Component	765	28	ASXL1,ATF2,BCAS3,CALCOCO1,CHEK2,CLASP1,DPY30,GABPA,HP1BP3,KAT2B,KDM3B,MCMBP,MEF2A,NCOA1,NUP133,NUP98,PDS5A,PDS5B,PIF1,PRKDC,PTGES3,SAP130,SMC3,SPI1,STAG1,TNKS,UBR2,ZWILCH	14.67	0.00084	0.0196487
GO:0098687	chromosomal region	Cellular Component	314	15	CHEK2,CLASP1,DPY30,KAT2B,NUP133,NUP98,PDS5A,PDS5B,PIF1,PRKDC,PTGES3,SMC3,STAG1,TNKS,ZWILCH	6.02	0.00114	0.025555
GO:0043228	non-membrane-bounded organelle	Cellular Component	3908	99	ABI1,ACACA,AHI1,ANKS1B,APPBP2,ARHGAP26,ASH1L,ASXL1,ATF2,ATG16L1,ATG7,BBS1,BCAS3,BRWD1,C2CD5,CALCOCO1,CCSER2,CDC42BPA,CDK5RAP2,CEP112,CEP128,CEP192,CGNL1,CHD2,CHEK2,CLASP1,CLNS1A,CLUAP1,DENND2A,DHX9,DKC1,DPY30,ERCC6,FARP2,GABPA,GLI3,GTF2F2,HAUS4,HNRNPM,HOOK3,HP1BP3,KAT2B,KDM3B,KLC1,LRP4,LRPPRC,LYST,MARK2,MCMBP,MEF2A,MTDH,MTUS1,NCOA1,NFATC3,NFIC,NLGN4X,NUP133,NUP98,OBSL1,PDE4B,PDS5A,PDS5B,PIF1,PIK3…	74.93	0.00124	0.0256585
GO:0043232	intracellular non-membrane-bounded organ...	Cellular Component	3908	99	ABI1,ACACA,AHI1,ANKS1B,APPBP2,ARHGAP26,ASH1L,ASXL1,ATF2,ATG16L1,ATG7,BBS1,BCAS3,BRWD1,C2CD5,CALCOCO1,CCSER2,CDC42BPA,CDK5RAP2,CEP112,CEP128,CEP192,CGNL1,CHD2,CHEK2,CLASP1,CLNS1A,CLUAP1,DENND2A,DHX9,DKC1,DPY30,ERCC6,FARP2,GABPA,GLI3,GTF2F2,HAUS4,HNRNPM,HOOK3,HP1BP3,KAT2B,KDM3B,KLC1,LRP4,LRPPRC,LYST,MARK2,MCMBP,MEF2A,MTDH,MTUS1,NCOA1,NFATC3,NFIC,NLGN4X,NUP133,NUP98,OBSL1,PDE4B,PDS5A,PDS5B,PIF1,PIK3…	74.93	0.00124	0.0256585
GO:0005635	nuclear envelope	Cellular Component	420	18	AKIRIN1,BNIP2,CMTM3,CSE1L,DGKH,FAF1,KPNA4,LRPPRC,MTDH,NUP133,NUP98,PARP11,PHF20,PUM2,SCAI,SPAST,TMEM57,TNKS	8.05	0.00131	0.0259393
GO:0042405	nuclear inclusion body	Cellular Component	12	3	ATXN1,ATXN3,NUP98	0.23	0.00135	0.0259393
GO:0015630	microtubule cytoskeleton	Cellular Component	1070	35	AHI1,APPBP2,BBS1,BCAS3,C2CD5,CCSER2,CDK5RAP2,CEP112,CEP128,CEP192,CLASP1,CLUAP1,DHX9,GTF2F2,HAUS4,HOOK3,KLC1,LRPPRC,LYST,MTUS1,OBSL1,PDE4B,PMS2,PRKACB,PTPN20,RBM39,RMDN1,SCLT1,SDCCAG8,SLC8A1,SMC3,SPAST,TBCE,TNKS,TSEN2	20.52	0.00143	0.026529
GO:0005813	centrosome	Cellular Component	481	19	AHI1,BBS1,CDK5RAP2,CEP112,CEP128,CEP192,CLASP1,CLUAP1,DHX9,HAUS4,HOOK3,OBSL1,PDE4B,PRKACB,SCLT1,SDCCAG8,SPAST,TNKS,TSEN2	9.22	0.00247	0.0440813
GO:0005815	microtubule organizing center	Cellular Component	631	23	AHI1,BBS1,C2CD5,CDK5RAP2,CEP112,CEP128,CEP192,CLASP1,CLUAP1,DHX9,HAUS4,HOOK3,MTUS1,OBSL1,PDE4B,PRKACB,PTPN20,RBM39,SCLT1,SDCCAG8,SPAST,TNKS,TSEN2	12.1	0.00254	0.0440813
GO:0000775	chromosome, centromeric region	Cellular Component	182	10	CLASP1,KAT2B,NUP133,NUP98,PDS5A,PDS5B,SMC3,STAG1,TNKS,ZWILCH	3.49	0.00275	0.0453224
GO:0031965	nuclear membrane	Cellular Component	277	13	AKIRIN1,CMTM3,DGKH,LRPPRC,MTDH,NUP133,NUP98,PHF20,PUM2,SCAI,SPAST,TMEM57,TNKS	5.31	0.00278	0.0453224
GO:0044464	cell part	Cellular Component	16011	321	ABCA10,ABI1,ACACA,ACAP2,ADAL,ADAM19,ADGRD1,ADNP,AEBP2,AGAP1,AHI1,AKIRIN1,ALG9,ANKRD13C,ANKS1B,APBB2,APPBP2,AQR,ARHGAP26,ASAP2,ASH1L,ASXL1,ATF1,ATF2,ATG16L1,ATG7,ATP2C1,ATRIP,ATXN1,ATXN3,BBS1,BCAS3,BCKDHB,BNIP2,BRWD1,C2CD5,C7,CALCOCO1,CAMLG,CAPN7,CBLB,CCDC125,CCSER2,CCZ1,CD302,CDC23,CDC42BPA,CDK5RAP2,CELF2,CEP112,CEP128,CEP192,CGNL1,CHD2,CHD6,CHEK2,CLASP1,CLK1,CLNS1A,CLUAP1,CMTM3,CNOT8,CNTN1,COX10…	306.98	0.00344	0.0544329
GO:0044451	nucleoplasm part	Cellular Component	928	30	AEBP2,ANKS1B,ATXN1,CHD6,CHEK2,CPSF2,CREBRF,DKC1,DPY30,ERCC6,GLI3,GTF2A1L,GTF2F2,HNRNPM,KAT2B,KMT2A,KMT2C,MED13,MEF2A,MNAT1,MTDH,NFYB,PHF20,PRKDC,RBM39,RNF4,SAP130,SQSTM1,TDG,ZMYM2	17.79	0.00369	0.0567206
GO:0031967	organelle envelope	Cellular Component	1106	34	AKIRIN1,ATF2,ATXN3,BNIP2,CMTM3,COX10,COX18,CSE1L,DGKH,FAF1,KPNA4,LRPPRC,MCCC1,MTDH,NDUFB2,NDUFV2,NUP133,NUP98,PANK2,PARP11,PGS1,PHF20,PUM2,RHOT1,RTN4IP1,SCAI,SIRT3,SLC25A26,SPAST,STX17,TIMM23B,TMEM57,TNKS,YME1L1	21.21	0.00448	0.0667411
GO:0005623	cell	Cellular Component	16040	321	ABCA10,ABI1,ACACA,ACAP2,ADAL,ADAM19,ADGRD1,ADNP,AEBP2,AGAP1,AHI1,AKIRIN1,ALG9,ANKRD13C,ANKS1B,APBB2,APPBP2,AQR,ARHGAP26,ASAP2,ASH1L,ASXL1,ATF1,ATF2,ATG16L1,ATG7,ATP2C1,ATRIP,ATXN1,ATXN3,BBS1,BCAS3,BCKDHB,BNIP2,BRWD1,C2CD5,C7,CALCOCO1,CAMLG,CAPN7,CBLB,CCDC125,CCSER2,CCZ1,CD302,CDC23,CDC42BPA,CDK5RAP2,CELF2,CEP112,CEP128,CEP192,CGNL1,CHD2,CHD6,CHEK2,CLASP1,CLK1,CLNS1A,CLUAP1,CMTM3,CNOT8,CNTN1,COX10…	307.54	0.00459	0.0667411
GO:0031975	envelope	Cellular Component	1111	34	AKIRIN1,ATF2,ATXN3,BNIP2,CMTM3,COX10,COX18,CSE1L,DGKH,FAF1,KPNA4,LRPPRC,MCCC1,MTDH,NDUFB2,NDUFV2,NUP133,NUP98,PANK2,PARP11,PGS1,PHF20,PUM2,RHOT1,RTN4IP1,SCAI,SIRT3,SLC25A26,SPAST,STX17,TIMM23B,TMEM57,TNKS,YME1L1	21.3	0.0048	0.0679579
GO:0012505	endomembrane system	Cellular Component	3860	94	ABI1,ACAP2,ADAM19,AKIRIN1,ALG9,ANKRD13C,APPBP2,ASAP2,ASH1L,ATP2C1,ATXN3,BNIP2,C2CD5,CAMLG,CDK5RAP2,CHEK2,CLASP1,CMTM3,CSE1L,CYB5R4,DCN,DGKH,DPY30,ERP44,ESYT2,FAF1,FCHO2,FCHSD2,FKBP5,GDI2,GPR161,HOOK3,ICMT,ITSN1,KPNA4,LRPPRC,MAN1A2,MDGA1,MTDH,MTUS1,NBAS,NBEA,NUP133,NUP98,OBSL1,OSBPL1A,PARD3B,PARP11,PCSK5,PDE4B,PDGFD,PDZD2,PGS1,PHF20,PICALM,PIGN,PPP6R3,PRKG1,PUM2,RABGEF1,RASGRF2,REPS1,RPS6KC1,SARAF…	74.01	0.00574	0.0791826
GO:0034708	methyltransferase complex	Cellular Component	87	6	AEBP2,CLNS1A,DPY30,KMT2A,KMT2C,PHF20	1.67	0.00654	0.087963
GO:0000785	chromatin	Cellular Component	423	16	ASXL1,BCAS3,CALCOCO1,GABPA,HP1BP3,KDM3B,MCMBP,MEF2A,NCOA1,PDS5A,PDS5B,SAP130,SMC3,SPI1,STAG1,UBR2	8.11	0.00786	0.103139
GO:0031209	SCAR complex	Cellular Component	8	2	ABI1,NCKAP1	0.15	0.00951	0.118986
GO:0045254	pyruvate dehydrogenase complex	Cellular Component	8	2	DLAT,PDHX	0.15	0.00951	0.118986
GO:0046930	pore complex	Cellular Component	96	6	C7,KPNA4,NUP133,NUP98,PARP11,TNKS	1.84	0.01041	0.127286
GO:0044430	cytoskeletal part	Cellular Component	1619	44	ABI1,AHI1,ANKS1B,APPBP2,ATG16L1,ATG7,BBS1,BCAS3,C2CD5,CDC42BPA,CDK5RAP2,CEP112,CEP128,CEP192,CGNL1,CLASP1,CLUAP1,DHX9,GLI3,HAUS4,HOOK3,KAT2B,KLC1,LRP4,LRPPRC,MARK2,MTUS1,NLGN4X,OBSL1,PDE4B,PLEKHH2,PRKACB,PSD3,PTPN20,RBM39,RMDN1,SCLT1,SDCCAG8,SLC8A1,SMC3,SPAST,TBCE,TNKS,TSEN2	31.04	0.01153	0.136488
GO:0035097	histone methyltransferase complex	Cellular Component	71	5	AEBP2,DPY30,KMT2A,KMT2C,PHF20	1.36	0.01167	0.136488
GO:0044666	MLL3/4 complex	Cellular Component	9	2	DPY30,KMT2C	0.17	0.01207	0.138163
GO:0031080	nuclear pore outer ring	Cellular Component	10	2	NUP133,NUP98	0.19	0.0149	0.167004
GO:0005856	cytoskeleton	Cellular Component	2149	55	ABI1,ACACA,AHI1,ANKS1B,APPBP2,ARHGAP26,ATG16L1,ATG7,BBS1,BCAS3,C2CD5,CCSER2,CDC42BPA,CDK5RAP2,CEP112,CEP128,CEP192,CGNL1,CLASP1,CLNS1A,CLUAP1,DENND2A,DHX9,FARP2,GLI3,GTF2F2,HAUS4,HOOK3,KAT2B,KLC1,LRP4,LRPPRC,LYST,MARK2,MTUS1,NLGN4X,OBSL1,PDE4B,PLEKHH2,PMS2,PRKACB,PSD3,PTPN13,PTPN20,RBM39,RMDN1,SCLT1,SDCCAG8,SLC8A1,SMC3,SPAST,TBCE,TNKS,TSEN2,ZNF175	41.2	0.01532	0.168207
GO:0043234	protein complex	Cellular Component	4303	100	ABI1,AEBP2,AHI1,APPBP2,ASXL1,ATXN1,BBS1,BCAS3,BCKDHB,C7,CDC23,CDK5RAP2,CEP128,CGNL1,CHD6,CLASP1,CLNS1A,CLUAP1,CNOT8,COX10,CPEB3,CPSF2,DCN,DHX9,DLAT,DPY30,ERCC6,FAF1,FGFR1,GLI3,GSPT1,GTF2A1L,GTF2F2,HAUS4,HOOK3,IL13RA1,ITGAL,ITGB5,KAT2B,KLC1,KMT2A,KMT2C,KPNA4,LRP4,LRPPRC,MARK2,MCCC1,MCM9,MCMBP,MED13,MEF2A,MNAT1,MTUS1,NBAS,NCKAP1,NDUFB2,NDUFV2,NFYB,NUP133,NUP98,PARP11,PDE4B,PDHX,PEX5L,PHF20,PHKB,PIC…	82.5	0.01628	0.175173
GO:0005874	microtubule	Cellular Component	386	14	APPBP2,BCAS3,CDK5RAP2,CLASP1,HAUS4,HOOK3,KLC1,LRPPRC,MTUS1,PTPN20,RMDN1,SLC8A1,SPAST,TBCE	7.4	0.01735	0.177818
GO:0042555	MCM complex	Cellular Component	11	2	MCM9,MCMBP	0.21	0.01798	0.177818
GO:0005643	nuclear pore	Cellular Component	80	5	KPNA4,NUP133,NUP98,PARP11,TNKS	1.53	0.01877	0.177818
GO:0005898	interleukin-13 receptor complex	Cellular Component	1	1	IL13RA1	0.02	0.01917	0.177818
GO:0016028	rhabdomere	Cellular Component	1	1	MERTK	0.02	0.01917	0.177818
GO:0031592	centrosomal corona	Cellular Component	1	1	CLASP1	0.02	0.01917	0.177818
GO:0045272	plasma membrane respiratory chain comple...	Cellular Component	1	1	NDUFV2	0.02	0.01917	0.177818
GO:0070470	plasma membrane respiratory chain	Cellular Component	1	1	NDUFV2	0.02	0.01917	0.177818
GO:1902494	catalytic complex	Cellular Component	1230	34	AEBP2,AQR,BCKDHB,CDC23,CHD6,CLNS1A,DKC1,DLAT,DPY30,GTF2A1L,GTF2F2,HNRNPM,KAT2B,KMT2A,KMT2C,MCCC1,MNAT1,NDUFB2,NDUFV2,PDHX,PHF20,PHKB,PIK3CB,PRPSAP2,PSMD13,RNF4,SAP130,SMURF2,STT3A,TSEN2,UBA2,UBE2D2,UBE3C,UBR2	23.58	0.02021	0.184288
GO:0000407	pre-autophagosomal structure	Cellular Component	31	3	ATG16L1,ATG7,SQSTM1	0.59	0.02112	0.187947
GO:0044232	organelle membrane contact site	Cellular Component	12	2	ESYT2,STX17	0.23	0.02131	0.187947
GO:0016235	aggresome	Cellular Component	33	3	CCZ1,SFMBT2,SQSTM1	0.63	0.02493	0.216328
GO:0099023	tethering complex	Cellular Component	59	4	HOOK3,NBAS,SCFD1,STX17	1.13	0.02647	0.226045
GO:0030897	HOPS complex	Cellular Component	14	2	HOOK3,STX17	0.27	0.02865	0.232196
GO:0005794	Golgi apparatus	Cellular Component	1444	38	ADAM19,ASAP2,ASH1L,ATP2C1,CDK5RAP2,CHEK2,CLASP1,DCN,DPY30,GDI2,HOOK3,MAN1A2,MDGA1,MTUS1,NBEA,OBSL1,PCSK5,PDGFD,PICALM,PPP6R3,PRKG1,SCFD1,SEC24B,SERINC3,SH3D19,SLC30A7,SLC35D2,SLC9A8,ST3GAL3,ST6GAL2,TFG,TMEM59,TNKS,TRAPPC11,TSNAX,UGCG,USO1,ZC3HAV1	27.69	0.02871	0.232196
GO:0005795	Golgi stack	Cellular Component	121	6	ASAP2,SCFD1,ST3GAL3,ST6GAL2,TMEM59,USO1	2.32	0.02915	0.232196
GO:0032991	macromolecular complex	Cellular Component	4951	111	ABI1,AEBP2,AHI1,APPBP2,AQR,ASXL1,ATXN1,BBS1,BCAS3,BCKDHB,C7,CDC23,CDK5RAP2,CEP128,CGNL1,CHD6,CLASP1,CLNS1A,CLUAP1,CNOT8,COX10,CPEB3,CPSF2,DCN,DHX9,DKC1,DLAT,DPY30,ERCC6,FAF1,FGFR1,GLI3,GSPT1,GTF2A1L,GTF2F2,HAUS4,HNRNPM,HOOK3,HP1BP3,IL13RA1,ITGAL,ITGB5,KAT2B,KLC1,KMT2A,KMT2C,KPNA4,LRP4,LRPPRC,LUC7L,MARK2,MCCC1,MCM9,MCMBP,MED13,MEF2A,MNAT1,MTUS1,NBAS,NCKAP1,NDUFB2,NDUFV2,NFYB,NUP133,NUP98,PARP11,PD…	94.93	0.02993	0.232196
GO:0048471	perinuclear region of cytoplasm	Cellular Component	620	19	ANKRD13C,BNIP2,CDK5RAP2,CYB5R4,CYFIP2,FAF1,HERC5,LRPPRC,MTDH,OBSL1,PICALM,PRKACB,PUM2,SEC24B,SERINC3,SLC30A7,SPAST,TSNAX,USO1	11.89	0.03067	0.232196
GO:0031985	Golgi cisterna	Cellular Component	91	5	ASAP2,SCFD1,ST3GAL3,ST6GAL2,TMEM59	1.74	0.0307	0.232196
GO:0030014	CCR4-NOT complex	Cellular Component	15	2	CNOT8,CPEB3	0.29	0.03264	0.232196
GO:0016604	nuclear body	Cellular Component	345	12	ANKS1B,CHEK2,CREBRF,DKC1,GLI3,HNRNPM,MTDH,RBM39,RNF4,SQSTM1,TDG,ZMYM2	6.61	0.03482	0.232196
GO:1990234	transferase complex	Cellular Component	714	21	AEBP2,CDC23,CHD6,CLNS1A,DPY30,GTF2A1L,GTF2F2,KAT2B,KMT2A,KMT2C,MNAT1,PHF20,PHKB,PIK3CB,PRPSAP2,RNF4,SAP130,SMURF2,STT3A,UBE2D2,UBR2	13.69	0.03498	0.232196
GO:0016605	PML body	Cellular Component	95	5	CHEK2,RNF4,SQSTM1,TDG,ZMYM2	1.82	0.03599	0.232196
GO:0090575	RNA polymerase II transcription factor c...	Cellular Component	65	4	GTF2A1L,GTF2F2,MNAT1,NFYB	1.25	0.03605	0.232196
GO:0002169	3-methylcrotonyl-CoA carboxylase complex...	Cellular Component	2	1	MCCC1	0.04	0.03798	0.232196
GO:0002189	ribose phosphate diphosphokinase complex	Cellular Component	2	1	PRPSAP2	0.04	0.03798	0.232196
GO:0005674	transcription factor TFIIF complex	Cellular Component	2	1	GTF2F2	0.04	0.03798	0.232196
GO:0018444	translation release factor complex	Cellular Component	2	1	GSPT1	0.04	0.03798	0.232196
GO:0030981	cortical microtubule cytoskeleton	Cellular Component	2	1	CLASP1	0.04	0.03798	0.232196
GO:0031510	SUMO activating enzyme complex	Cellular Component	2	1	UBA2	0.04	0.03798	0.232196
GO:0033768	SUMO-targeted ubiquitin ligase complex	Cellular Component	2	1	RNF4	0.04	0.03798	0.232196
GO:0034684	integrin alphav-beta5 complex	Cellular Component	2	1	ITGB5	0.04	0.03798	0.232196
GO:0034687	integrin alphaL-beta2 complex	Cellular Component	2	1	ITGAL	0.04	0.03798	0.232196
GO:0035517	PR-DUB complex	Cellular Component	2	1	ASXL1	0.04	0.03798	0.232196
GO:0044753	amphisome	Cellular Component	2	1	SQSTM1	0.04	0.03798	0.232196
GO:0097165	nuclear stress granule	Cellular Component	2	1	DHX9	0.04	0.03798	0.232196
GO:0097362	MCM8-MCM9 complex	Cellular Component	2	1	MCM9	0.04	0.03798	0.232196
GO:1905202	methylcrotonoyl-CoA carboxylase complex	Cellular Component	2	1	MCCC1	0.04	0.03798	0.232196
GO:0035371	microtubule plus-end	Cellular Component	17	2	CDK5RAP2,CLASP1	0.33	0.04124	0.246524
GO:1990752	microtubule end	Cellular Component	17	2	CDK5RAP2,CLASP1	0.33	0.04124	0.246524
GO:0098796	membrane protein complex	Cellular Component	689	20	C7,FAF1,HOOK3,ITGAL,ITGB5,KPNA4,LRP4,NDUFB2,NDUFV2,NUP133,NUP98,PARP11,PICALM,SCFD1,SCLT1,SEC24B,STX17,STXBP5L,TIMM23B,TNKS	13.21	0.04366	0.258122
GO:1990204	oxidoreductase complex	Cellular Component	101	5	BCKDHB,DLAT,NDUFB2,NDUFV2,PDHX	1.94	0.04493	0.262521
GO:0005905	clathrin-coated pit	Cellular Component	70	4	FCHO2,ITSN1,PICALM,REPS1	1.34	0.04538	0.262521
GO:0003824	catalytic activity	Molecular Function	7219	184	ABCA10,ABI1,ACACA,ACAP2,ADAL,ADAM19,ADGRD1,ADNP,AGAP1,ALG9,APPBP2,ARHGAP26,ASAP2,ASH1L,ASPHD1,ATF2,ATG16L1,ATG7,ATP2C1,ATXN3,BCAS3,BCKDHB,BNIP2,CAPN7,CBLB,CCZ1,CDC23,CDC42BPA,CEP192,CGNL1,CHD2,CHD6,CHEK2,CLK1,CNOT8,COX10,CRIM1,CTPS2,CYB5R4,CYFIP2,DCN,DCTD,DDX10,DENND2A,DENND4A,DENND5B,DGKH,DHX9,DKC1,DLAT,DOCK5,DPP8,DPY30,ERCC6,ERP44,FAF1,FAM135A,FARP2,FGFR1,FKBP5,FPGT-TNNI3K,GARNL3,GDI2,GMPS,GRK4…	145.48	8e-06	0.006592
GO:0016740	transferase activity	Molecular Function	2898	88	ABI1,ADNP,ALG9,ASH1L,ATF2,ATG16L1,BCAS3,CBLB,CDC23,CDC42BPA,CHEK2,CLK1,COX10,CRIM1,DCN,DGKH,DKC1,DLAT,DPY30,ERCC6,FAF1,FGFR1,FPGT-TNNI3K,GRK4,HECTD1,HERC3,HERC5,ICMT,ITSN1,KAT2B,KMT2A,KMT2C,LIMK2,LTBP4,MAPK10,MARK2,MERTK,METTL15,METTL8,MNAT1,MTR,NCOA1,NRK,PANK2,PANK3,PARP11,PARP12,PDE5A,PDGFD,PDHX,PGS1,PHF20,PHKB,PIF1,PIGN,PIK3CB,POLI,PRDM6,PRIMPOL,PRKACB,PRKDC,PRKG1,PRPSAP2,PSMD13,PTGES3,RC3H2,R…	58.4	2.5e-05	0.0103
GO:0003682	chromatin binding	Molecular Function	467	22	ADNP,ASH1L,ATF2,BCAS3,CALCOCO1,ERCC6,FLI1,GABPA,GLI3,HP1BP3,KAT2B,KDM3B,KMT2A,MCMBP,MEF2A,NCOA1,PRIMPOL,RNF4,SMC3,STAG1,TDG,TDRD3	9.41	0.00021	0.044496
GO:0003950	NAD+ ADP-ribosyltransferase activity	Molecular Function	29	5	PARP11,PARP12,SIRT3,TNKS,ZC3HAV1	0.58	0.00026	0.044496
GO:0018024	histone-lysine N-methyltransferase activ...	Molecular Function	45	6	ASH1L,DPY30,KMT2A,KMT2C,PRDM6,SETD2	0.91	0.00027	0.044496
GO:0042800	histone methyltransferase activity (H3-K...	Molecular Function	18	4	ASH1L,DPY30,KMT2A,KMT2C	0.36	0.0004	0.0542105
GO:0097367	carbohydrate derivative binding	Molecular Function	2471	72	ABCA10,ABI3BP,ACACA,AGAP1,ATP2C1,CCZ1,CDC42BPA,CHD2,CHD6,CHEK2,CLASP1,CLK1,CNTN1,CTPS2,DCN,DDX10,DENND2A,DENND4A,DENND5B,DGKH,DHX9,DOCK5,ERCC6,FARP2,FBN1,FGFR1,FPGT-TNNI3K,GDI2,GMPS,GRK4,GSPT1,GTF2F2,ITSN1,LIMK2,LTBP4,MAPK10,MARK2,MCCC1,MCM9,MERTK,NID1,NRK,PANK2,PANK3,PDE4B,PDE5A,PDS5B,PGS1,PIF1,PIK3CB,PMS2,PRKACB,PRKDC,PRKG1,PSD3,RABGEF1,RAPGEF4,RASA1,RASGRF2,RHOT1,RNGTT,RPS6KC1,SERPINE2,SLIT3,S…	49.8	0.00061	0.0542105
GO:0030695	GTPase regulator activity	Molecular Function	574	24	ACAP2,AGAP1,ARHGAP26,ASAP2,BNIP2,CCZ1,DENND2A,DENND4A,DENND5B,DOCK5,FARP2,FGFR1,GARNL3,GDI2,ITSN1,PSD3,RABGEF1,RAPGEF4,RASA1,RASGRF2,RGS22,SIPA1L2,STXBP5L,TBC1D22A	11.57	0.00062	0.0542105
GO:0016462	pyrophosphatase activity	Molecular Function	1528	49	ABCA10,ACAP2,AGAP1,APPBP2,ARHGAP26,ASAP2,ATP2C1,BCAS3,BNIP2,CCZ1,CGNL1,CHD2,CHD6,DDX10,DENND2A,DENND4A,DENND5B,DHX9,DOCK5,ERCC6,FARP2,FGFR1,GARNL3,GDI2,GMPS,GSPT1,GTF2F2,ITSN1,KLC1,MCM9,MNAT1,PIF1,PMS2,PRKG1,PSD3,RABGEF1,RAPGEF4,RASA1,RASGRF2,RGS22,RHOT1,RNGTT,SIPA1L2,SMC3,SPAST,STXBP5L,TBC1D22A,VWA8,YME1L1	30.79	0.00073	0.0542105
GO:0016818	hydrolase activity, acting on acid anhyd...	Molecular Function	1530	49	ABCA10,ACAP2,AGAP1,APPBP2,ARHGAP26,ASAP2,ATP2C1,BCAS3,BNIP2,CCZ1,CGNL1,CHD2,CHD6,DDX10,DENND2A,DENND4A,DENND5B,DHX9,DOCK5,ERCC6,FARP2,FGFR1,GARNL3,GDI2,GMPS,GSPT1,GTF2F2,ITSN1,KLC1,MCM9,MNAT1,PIF1,PMS2,PRKG1,PSD3,RABGEF1,RAPGEF4,RASA1,RASGRF2,RGS22,RHOT1,RNGTT,SIPA1L2,SMC3,SPAST,STXBP5L,TBC1D22A,VWA8,YME1L1	30.83	0.00075	0.0542105
GO:0016817	hydrolase activity, acting on acid anhyd...	Molecular Function	1532	49	ABCA10,ACAP2,AGAP1,APPBP2,ARHGAP26,ASAP2,ATP2C1,BCAS3,BNIP2,CCZ1,CGNL1,CHD2,CHD6,DDX10,DENND2A,DENND4A,DENND5B,DHX9,DOCK5,ERCC6,FARP2,FGFR1,GARNL3,GDI2,GMPS,GSPT1,GTF2F2,ITSN1,KLC1,MCM9,MNAT1,PIF1,PMS2,PRKG1,PSD3,RABGEF1,RAPGEF4,RASA1,RASGRF2,RGS22,RHOT1,RNGTT,SIPA1L2,SMC3,SPAST,STXBP5L,TBC1D22A,VWA8,YME1L1	30.87	0.00077	0.0542105
GO:0016279	protein-lysine N-methyltransferase activ...	Molecular Function	55	6	ASH1L,DPY30,KMT2A,KMT2C,PRDM6,SETD2	1.11	0.00081	0.0542105
GO:0016278	lysine N-methyltransferase activity	Molecular Function	56	6	ASH1L,DPY30,KMT2A,KMT2C,PRDM6,SETD2	1.13	0.00089	0.0542105
GO:0042054	histone methyltransferase activity	Molecular Function	57	6	ASH1L,DPY30,KMT2A,KMT2C,PRDM6,SETD2	1.15	0.00098	0.0542105
GO:0005515	protein binding	Molecular Function	8767	204	ABI1,ABI3BP,ACACA,ACAP2,ADAM19,ADNP,AHI1,ANKRD13C,ANKS1B,APBB2,APPBP2,ASAP2,ASXL1,ATF1,ATF2,ATG16L1,ATG7,ATRIP,ATXN1,ATXN3,BBS1,BCAS3,BCKDHB,BNIP2,CALCOCO1,CAMLG,CAPN7,CBLB,CCSER2,CCZ1,CDC23,CDC42BPA,CDK5RAP2,CEP192,CHD2,CHD6,CHEK2,CLASP1,CLIP4,CLNS1A,CLUAP1,CMTM3,CNOT8,CNTN1,CPEB3,CPSF2,CREBRF,CRIM1,CSE1L,CYFIP2,DCN,DCTD,DHX9,DKC1,DLAT,DOCK5,DPY30,DSCAML1,ERCC6,FAF1,FAM126A,FARP2,FBN1,FCHSD2,FGF…	176.67	0.00103	0.0542105
GO:0008276	protein methyltransferase activity	Molecular Function	80	7	ASH1L,DPY30,ICMT,KMT2A,KMT2C,PRDM6,SETD2	1.61	0.00114	0.0542105
GO:0008134	transcription factor binding	Molecular Function	497	21	APBB2,ASXL1,ATF2,ATG7,BBS1,BCAS3,CHD6,DHX9,FAF1,KAT2B,MED13,MEF2A,MTDH,NCOA1,NFYB,PRKDC,RNF4,SPI1,TDG,UBA2,ZNF516	10.02	0.00118	0.0542105
GO:0017111	nucleoside-triphosphatase activity	Molecular Function	1485	47	ABCA10,ACAP2,AGAP1,APPBP2,ARHGAP26,ASAP2,ATP2C1,BCAS3,BNIP2,CCZ1,CGNL1,CHD2,CHD6,DDX10,DENND2A,DENND4A,DENND5B,DHX9,DOCK5,ERCC6,FARP2,FGFR1,GARNL3,GDI2,GSPT1,GTF2F2,ITSN1,KLC1,MCM9,MNAT1,PIF1,PMS2,PRKG1,PSD3,RABGEF1,RAPGEF4,RASA1,RASGRF2,RGS22,RHOT1,SIPA1L2,SMC3,SPAST,STXBP5L,TBC1D22A,VWA8,YME1L1	29.93	0.00124	0.0542105
GO:0060589	nucleoside-triphosphatase regulator acti...	Molecular Function	604	24	ACAP2,AGAP1,ARHGAP26,ASAP2,BNIP2,CCZ1,DENND2A,DENND4A,DENND5B,DOCK5,FARP2,FGFR1,GARNL3,GDI2,ITSN1,PSD3,RABGEF1,RAPGEF4,RASA1,RASGRF2,RGS22,SIPA1L2,STXBP5L,TBC1D22A	12.17	0.00125	0.0542105
GO:0032555	purine ribonucleotide binding	Molecular Function	2128	62	ABCA10,ACACA,AGAP1,ATP2C1,CCZ1,CDC42BPA,CHD2,CHD6,CHEK2,CLK1,CTPS2,DDX10,DENND2A,DENND4A,DENND5B,DGKH,DHX9,DOCK5,ERCC6,FARP2,FGFR1,FPGT-TNNI3K,GDI2,GMPS,GRK4,GSPT1,GTF2F2,ITSN1,LIMK2,MAPK10,MARK2,MCCC1,MCM9,MERTK,NRK,PANK2,PANK3,PDE4B,PDE5A,PDS5B,PGS1,PIF1,PIK3CB,PMS2,PRKACB,PRKDC,PRKG1,PSD3,RABGEF1,RAPGEF4,RASGRF2,RHOT1,RNGTT,RPS6KC1,SMC3,SPAST,STK3,TNNI3K,UBA2,UBE2D2,VWA8,YME1L1	42.88	0.00159	0.0605323
GO:0008170	N-methyltransferase activity	Molecular Function	86	7	ASH1L,DPY30,KMT2A,KMT2C,METTL15,PRDM6,SETD2	1.73	0.00174	0.0605323
GO:0000166	nucleotide binding	Molecular Function	2612	73	ABCA10,ACACA,AGAP1,ATP2C1,CCZ1,CDC42BPA,CELF2,CHD2,CHD6,CHEK2,CLK1,CPEB3,CTPS2,CYB5R4,DDX10,DENND2A,DENND4A,DENND5B,DGKH,DHX9,DOCK5,ERCC6,FARP2,FGFR1,FPGT-TNNI3K,GDI2,GMPS,GRK4,GSPT1,GSR,GTF2F2,HNRNPM,ITSN1,LIMK2,MAPK10,MARK2,MCCC1,MCM9,ME3,MERTK,MTO1,NRK,PANK2,PANK3,PDE4B,PDE5A,PDS5B,PGS1,PIF1,PIK3CB,PMS2,PRKACB,PRKDC,PRKG1,PSD3,RABGEF1,RAPGEF4,RASGRF2,RBM39,RBM5,RHOT1,RNGTT,RPS6KC1,SIRT3,SMC3,S…	52.64	0.00178	0.0605323
GO:1901265	nucleoside phosphate binding	Molecular Function	2613	73	ABCA10,ACACA,AGAP1,ATP2C1,CCZ1,CDC42BPA,CELF2,CHD2,CHD6,CHEK2,CLK1,CPEB3,CTPS2,CYB5R4,DDX10,DENND2A,DENND4A,DENND5B,DGKH,DHX9,DOCK5,ERCC6,FARP2,FGFR1,FPGT-TNNI3K,GDI2,GMPS,GRK4,GSPT1,GSR,GTF2F2,HNRNPM,ITSN1,LIMK2,MAPK10,MARK2,MCCC1,MCM9,ME3,MERTK,MTO1,NRK,PANK2,PANK3,PDE4B,PDE5A,PDS5B,PGS1,PIF1,PIK3CB,PMS2,PRKACB,PRKDC,PRKG1,PSD3,RABGEF1,RAPGEF4,RASGRF2,RBM39,RBM5,RHOT1,RNGTT,RPS6KC1,SIRT3,SMC3,S…	52.66	0.0018	0.0605323
GO:0043168	anion binding	Molecular Function	2922	80	ABCA10,ABI3BP,ACACA,AGAP1,ARHGAP26,ATP2C1,C2CD5,CCZ1,CDC42BPA,CHD2,CHD6,CHEK2,CLK1,CTPS2,CYB5R4,DDX10,DENND2A,DENND4A,DENND5B,DGKH,DHX9,DOCK5,ERCC6,ESYT2,FARP2,FBN1,FCHO2,FGFR1,FPGT-TNNI3K,GDI2,GMPS,GRK4,GSPT1,GSR,GTF2F2,ITSN1,LIMK2,MAPK10,MARK2,MCCC1,MCM9,MERTK,MTO1,NLGN4X,NRK,OSBPL1A,PANK2,PANK3,PDE4B,PDE5A,PDS5B,PGS1,PICALM,PIF1,PIK3CB,PMS2,PRKACB,PRKDC,PRKG1,PSD3,RABGEF1,RAPGEF4,RASGRF2,RHOT1…	58.88	0.00183	0.0605323
GO:0017076	purine nucleotide binding	Molecular Function	2141	62	ABCA10,ACACA,AGAP1,ATP2C1,CCZ1,CDC42BPA,CHD2,CHD6,CHEK2,CLK1,CTPS2,DDX10,DENND2A,DENND4A,DENND5B,DGKH,DHX9,DOCK5,ERCC6,FARP2,FGFR1,FPGT-TNNI3K,GDI2,GMPS,GRK4,GSPT1,GTF2F2,ITSN1,LIMK2,MAPK10,MARK2,MCCC1,MCM9,MERTK,NRK,PANK2,PANK3,PDE4B,PDE5A,PDS5B,PGS1,PIF1,PIK3CB,PMS2,PRKACB,PRKDC,PRKG1,PSD3,RABGEF1,RAPGEF4,RASGRF2,RHOT1,RNGTT,RPS6KC1,SMC3,SPAST,STK3,TNNI3K,UBA2,UBE2D2,VWA8,YME1L1	43.15	0.00184	0.0605323
GO:0032553	ribonucleotide binding	Molecular Function	2144	62	ABCA10,ACACA,AGAP1,ATP2C1,CCZ1,CDC42BPA,CHD2,CHD6,CHEK2,CLK1,CTPS2,DDX10,DENND2A,DENND4A,DENND5B,DGKH,DHX9,DOCK5,ERCC6,FARP2,FGFR1,FPGT-TNNI3K,GDI2,GMPS,GRK4,GSPT1,GTF2F2,ITSN1,LIMK2,MAPK10,MARK2,MCCC1,MCM9,MERTK,NRK,PANK2,PANK3,PDE4B,PDE5A,PDS5B,PGS1,PIF1,PIK3CB,PMS2,PRKACB,PRKDC,PRKG1,PSD3,RABGEF1,RAPGEF4,RASGRF2,RHOT1,RNGTT,RPS6KC1,SMC3,SPAST,STK3,TNNI3K,UBA2,UBE2D2,VWA8,YME1L1	43.21	0.00191	0.0605323
GO:1901363	heterocyclic compound binding	Molecular Function	5662	139	ABCA10,ACACA,ADNP,AEBP2,AGAP1,ASH1L,ASXL1,ATF1,ATF2,ATP2C1,ATXN1,CALCOCO1,CCZ1,CDC42BPA,CDK5RAP2,CELF2,CHD2,CHD6,CHEK2,CLK1,CNOT8,CPEB3,CPSF2,CREBRF,CTPS2,CYB5R4,DDX10,DENND2A,DENND4A,DENND5B,DGKH,DHX9,DKC1,DOCK5,ERCC6,FARP2,FGFR1,FKBP5,FLI1,FOXK2,FPGT-TNNI3K,GABPA,GDI2,GLI3,GMPS,GRK4,GSPT1,GSR,GTF2A1L,GTF2F2,HNRNPM,HP1BP3,ITSN1,KAT2B,KDM3B,KDM5B,KDM5C,KMT2A,KMT2C,LIMK2,LRPPRC,LUC7L,MAPK10,MARK2,…	114.1	0.00219	0.0668356
GO:0004594	pantothenate kinase activity	Molecular Function	4	2	PANK2,PANK3	0.08	0.00236	0.0681173
GO:0008757	S-adenosylmethionine-dependent methyltra...	Molecular Function	143	9	ASH1L,DPY30,ICMT,KMT2A,KMT2C,METTL15,MTR,PRDM6,SETD2	2.88	0.00247	0.0681173
GO:0032559	adenyl ribonucleotide binding	Molecular Function	1496	46	ABCA10,ACACA,ATP2C1,CDC42BPA,CHD2,CHD6,CHEK2,CLK1,CTPS2,DDX10,DGKH,DHX9,ERCC6,FGFR1,FPGT-TNNI3K,GMPS,GRK4,GTF2F2,LIMK2,MAPK10,MARK2,MCCC1,MCM9,MERTK,NRK,PANK2,PANK3,PDE4B,PDS5B,PGS1,PIF1,PIK3CB,PMS2,PRKACB,PRKDC,PRKG1,RAPGEF4,RPS6KC1,SMC3,SPAST,STK3,TNNI3K,UBA2,UBE2D2,VWA8,YME1L1	30.15	0.00248	0.0681173
GO:0016772	transferase activity, transferring phosp...	Molecular Function	1581	48	ABI1,ADNP,CBLB,CDC42BPA,CHEK2,CLK1,CRIM1,DCN,DGKH,DKC1,ERCC6,FAF1,FGFR1,FPGT-TNNI3K,GRK4,HERC5,ITSN1,KAT2B,LIMK2,LTBP4,MAPK10,MARK2,MERTK,MNAT1,NRK,PANK2,PANK3,PDE5A,PDGFD,PGS1,PHKB,PIF1,PIGN,PIK3CB,POLI,PRIMPOL,PRKACB,PRKDC,PRKG1,PRPSAP2,PTGES3,RNGTT,RPS6KC1,SQSTM1,STK3,TNKS,TNNI3K,ZMYM2	31.86	0.00257	0.0683123
GO:0030554	adenyl nucleotide binding	Molecular Function	1507	46	ABCA10,ACACA,ATP2C1,CDC42BPA,CHD2,CHD6,CHEK2,CLK1,CTPS2,DDX10,DGKH,DHX9,ERCC6,FGFR1,FPGT-TNNI3K,GMPS,GRK4,GTF2F2,LIMK2,MAPK10,MARK2,MCCC1,MCM9,MERTK,NRK,PANK2,PANK3,PDE4B,PDS5B,PGS1,PIF1,PIK3CB,PMS2,PRKACB,PRKDC,PRKG1,RAPGEF4,RPS6KC1,SMC3,SPAST,STK3,TNNI3K,UBA2,UBE2D2,VWA8,YME1L1	30.37	0.00286	0.0688956
GO:0032550	purine ribonucleoside binding	Molecular Function	2097	60	ABCA10,ACACA,AGAP1,ATP2C1,CCZ1,CDC42BPA,CHD2,CHD6,CHEK2,CLK1,CTPS2,DDX10,DENND2A,DENND4A,DENND5B,DGKH,DHX9,DOCK5,ERCC6,FARP2,FGFR1,FPGT-TNNI3K,GDI2,GMPS,GRK4,GSPT1,GTF2F2,ITSN1,LIMK2,MAPK10,MARK2,MCCC1,MCM9,MERTK,NRK,PANK2,PANK3,PDS5B,PGS1,PIF1,PIK3CB,PMS2,PRKACB,PRKDC,PRKG1,PSD3,RABGEF1,RAPGEF4,RASGRF2,RHOT1,RNGTT,RPS6KC1,SMC3,SPAST,STK3,TNNI3K,UBA2,UBE2D2,VWA8,YME1L1	42.26	0.00291	0.0688956
GO:0017112	Rab guanyl-nucleotide exchange factor ac...	Molecular Function	30	4	DENND2A,DENND4A,DENND5B,RABGEF1	0.6	0.00293	0.0688956
GO:0001883	purine nucleoside binding	Molecular Function	2100	60	ABCA10,ACACA,AGAP1,ATP2C1,CCZ1,CDC42BPA,CHD2,CHD6,CHEK2,CLK1,CTPS2,DDX10,DENND2A,DENND4A,DENND5B,DGKH,DHX9,DOCK5,ERCC6,FARP2,FGFR1,FPGT-TNNI3K,GDI2,GMPS,GRK4,GSPT1,GTF2F2,ITSN1,LIMK2,MAPK10,MARK2,MCCC1,MCM9,MERTK,NRK,PANK2,PANK3,PDS5B,PGS1,PIF1,PIK3CB,PMS2,PRKACB,PRKDC,PRKG1,PSD3,RABGEF1,RAPGEF4,RASGRF2,RHOT1,RNGTT,RPS6KC1,SMC3,SPAST,STK3,TNNI3K,UBA2,UBE2D2,VWA8,YME1L1	42.32	0.00301	0.0688956
GO:0032549	ribonucleoside binding	Molecular Function	2100	60	ABCA10,ACACA,AGAP1,ATP2C1,CCZ1,CDC42BPA,CHD2,CHD6,CHEK2,CLK1,CTPS2,DDX10,DENND2A,DENND4A,DENND5B,DGKH,DHX9,DOCK5,ERCC6,FARP2,FGFR1,FPGT-TNNI3K,GDI2,GMPS,GRK4,GSPT1,GTF2F2,ITSN1,LIMK2,MAPK10,MARK2,MCCC1,MCM9,MERTK,NRK,PANK2,PANK3,PDS5B,PGS1,PIF1,PIK3CB,PMS2,PRKACB,PRKDC,PRKG1,PSD3,RABGEF1,RAPGEF4,RASGRF2,RHOT1,RNGTT,RPS6KC1,SMC3,SPAST,STK3,TNNI3K,UBA2,UBE2D2,VWA8,YME1L1	42.32	0.00301	0.0688956
GO:0001882	nucleoside binding	Molecular Function	2107	60	ABCA10,ACACA,AGAP1,ATP2C1,CCZ1,CDC42BPA,CHD2,CHD6,CHEK2,CLK1,CTPS2,DDX10,DENND2A,DENND4A,DENND5B,DGKH,DHX9,DOCK5,ERCC6,FARP2,FGFR1,FPGT-TNNI3K,GDI2,GMPS,GRK4,GSPT1,GTF2F2,ITSN1,LIMK2,MAPK10,MARK2,MCCC1,MCM9,MERTK,NRK,PANK2,PANK3,PDS5B,PGS1,PIF1,PIK3CB,PMS2,PRKACB,PRKDC,PRKG1,PSD3,RABGEF1,RAPGEF4,RASGRF2,RHOT1,RNGTT,RPS6KC1,SMC3,SPAST,STK3,TNNI3K,UBA2,UBE2D2,VWA8,YME1L1	42.46	0.00325	0.0723784
GO:0008047	enzyme activator activity	Molecular Function	477	19	ABI1,ACAP2,AGAP1,ARHGAP26,ASAP2,BCAS3,BNIP2,ERCC6,GARNL3,GDI2,ITSN1,MARK2,RASA1,RGS22,SIPA1L2,STK3,STXBP5L,TBC1D22A,UBA2	9.61	0.00382	0.0751181
GO:0004075	biotin carboxylase activity	Molecular Function	5	2	ACACA,MCCC1	0.1	0.00389	0.0751181
GO:0004844	uracil DNA N-glycosylase activity	Molecular Function	5	2	TDG,UNG	0.1	0.00389	0.0751181
GO:0032453	histone demethylase activity (H3-K4 spec...	Molecular Function	5	2	KDM5B,KDM5C	0.1	0.00389	0.0751181
GO:0097506	deaminated base DNA N-glycosylase activi...	Molecular Function	5	2	TDG,UNG	0.1	0.00389	0.0751181
GO:0097159	organic cyclic compound binding	Molecular Function	5741	139	ABCA10,ACACA,ADNP,AEBP2,AGAP1,ASH1L,ASXL1,ATF1,ATF2,ATP2C1,ATXN1,CALCOCO1,CCZ1,CDC42BPA,CDK5RAP2,CELF2,CHD2,CHD6,CHEK2,CLK1,CNOT8,CPEB3,CPSF2,CREBRF,CTPS2,CYB5R4,DDX10,DENND2A,DENND4A,DENND5B,DGKH,DHX9,DKC1,DOCK5,ERCC6,FARP2,FGFR1,FKBP5,FLI1,FOXK2,FPGT-TNNI3K,GABPA,GDI2,GLI3,GMPS,GRK4,GSPT1,GSR,GTF2A1L,GTF2F2,HNRNPM,HP1BP3,ITSN1,KAT2B,KDM3B,KDM5B,KDM5C,KMT2A,KMT2C,LIMK2,LRPPRC,LUC7L,MAPK10,MARK2,…	115.69	0.00392	0.0751181
GO:0005524	ATP binding	Molecular Function	1460	44	ABCA10,ACACA,ATP2C1,CDC42BPA,CHD2,CHD6,CHEK2,CLK1,CTPS2,DDX10,DGKH,DHX9,ERCC6,FGFR1,FPGT-TNNI3K,GMPS,GRK4,GTF2F2,LIMK2,MAPK10,MARK2,MCCC1,MCM9,MERTK,NRK,PANK2,PANK3,PDS5B,PGS1,PIF1,PIK3CB,PMS2,PRKACB,PRKDC,PRKG1,RPS6KC1,SMC3,SPAST,STK3,TNNI3K,UBA2,UBE2D2,VWA8,YME1L1	29.42	0.00447	0.0837109
GO:0048487	beta-tubulin binding	Molecular Function	34	4	ADNP,BCAS3,LRPPRC,SPAST	0.69	0.00466	0.0853298
GO:0034061	DNA polymerase activity	Molecular Function	78	6	DKC1,PIF1,POLI,PRIMPOL,PTGES3,TNKS	1.57	0.00487	0.0872365
GO:0016763	transferase activity, transferring pento...	Molecular Function	56	5	PARP11,PARP12,SIRT3,TNKS,ZC3HAV1	1.13	0.00531	0.0912738
GO:0004738	pyruvate dehydrogenase activity	Molecular Function	6	2	DLAT,PDHX	0.12	0.00576	0.0912738
GO:0016421	CoA carboxylase activity	Molecular Function	6	2	ACACA,MCCC1	0.12	0.00576	0.0912738
GO:0034603	pyruvate dehydrogenase [NAD(P)+] activit...	Molecular Function	6	2	DLAT,PDHX	0.12	0.00576	0.0912738
GO:0034604	pyruvate dehydrogenase (NAD+) activity	Molecular Function	6	2	DLAT,PDHX	0.12	0.00576	0.0912738
GO:0046975	histone methyltransferase activity (H3-K...	Molecular Function	6	2	ASH1L,SETD2	0.12	0.00576	0.0912738
GO:0016407	acetyltransferase activity	Molecular Function	108	7	ATF2,BCAS3,DLAT,KAT2B,NCOA1,PHF20,SAP130	2.18	0.00622	0.0967034
GO:0008094	DNA-dependent ATPase activity	Molecular Function	83	6	CHD2,CHD6,DHX9,ERCC6,MNAT1,PIF1	1.67	0.00658	0.100406
GO:0036094	small molecule binding	Molecular Function	2978	78	ABCA10,ACACA,AGAP1,ATP2C1,CCZ1,CDC42BPA,CELF2,CHD2,CHD6,CHEK2,CLK1,CPEB3,CTPS2,CYB5R4,DDX10,DENND2A,DENND4A,DENND5B,DGKH,DHX9,DOCK5,ERCC6,ESYT2,FARP2,FCHO2,FGFR1,FPGT-TNNI3K,GDI2,GMPS,GRK4,GSPT1,GSR,GTF2F2,HNRNPM,ITSN1,LIMK2,MAPK10,MARK2,MCCC1,MCM9,ME3,MERTK,MTO1,MTR,NRK,PANK2,PANK3,PDE4B,PDE5A,PDS5B,PGS1,PIF1,PIK3CB,PMS2,PRKACB,PRKDC,PRKG1,PSD3,RABGEF1,RAPGEF4,RASGRF2,RBM39,RBM5,RHOT1,RNGTT,RPS6…	60.01	0.00687	0.102411
GO:0030551	cyclic nucleotide binding	Molecular Function	38	4	PDE4B,PDE5A,PRKG1,RAPGEF4	0.77	0.00696	0.102411
GO:0004402	histone acetyltransferase activity	Molecular Function	61	5	ATF2,KAT2B,NCOA1,PHF20,SAP130	1.23	0.00763	0.1103
GO:0030234	enzyme regulator activity	Molecular Function	1216	37	ABI1,ACAP2,AGAP1,ARHGAP26,ASAP2,BCAS3,BNIP2,CCZ1,CRIM1,DCN,DENND2A,DENND4A,DENND5B,DOCK5,ERCC6,FAF1,FARP2,FGFR1,GARNL3,GDI2,ITSN1,KAT2B,MARK2,PIF1,PRPSAP2,PSD3,RABGEF1,RAPGEF4,RASA1,RASGRF2,RGS22,SERPINE2,SIPA1L2,STK3,STXBP5L,TBC1D22A,UBA2	24.5	0.00778	0.11053
GO:0008545	JUN kinase kinase activity	Molecular Function	7	2	ERCC6,NRK	0.14	0.00795	0.111031
GO:0061733	peptide-lysine-N-acetyltransferase activ...	Molecular Function	62	5	ATF2,KAT2B,NCOA1,PHF20,SAP130	1.25	0.00816	0.112064
GO:0003713	transcription coactivator activity	Molecular Function	303	13	ASXL1,ATF2,CALCOCO1,GABPA,GTF2A1L,KAT2B,MED13,MEF2A,MTDH,NCOA1,RNF4,SAP130,TDRD3	6.11	0.00869	0.115892
GO:0019209	kinase activator activity	Molecular Function	63	5	ABI1,ERCC6,ITSN1,MARK2,STK3	1.27	0.00872	0.115892
GO:0005096	GTPase activator activity	Molecular Function	274	12	ACAP2,AGAP1,ARHGAP26,ASAP2,BNIP2,GARNL3,GDI2,RASA1,RGS22,SIPA1L2,STXBP5L,TBC1D22A	5.52	0.00985	0.12875
GO:0008168	methyltransferase activity	Molecular Function	209	10	ASH1L,DPY30,ICMT,KMT2A,KMT2C,METTL15,METTL8,MTR,PRDM6,SETD2	4.21	0.01	0.12875
GO:0016885	ligase activity, forming carbon-carbon b...	Molecular Function	8	2	ACACA,MCCC1	0.16	0.01046	0.132601
GO:0003720	telomerase activity	Molecular Function	45	4	DKC1,PIF1,PTGES3,TNKS	0.91	0.0126	0.154015
GO:0003964	RNA-directed DNA polymerase activity	Molecular Function	45	4	DKC1,PIF1,PTGES3,TNKS	0.91	0.0126	0.154015
GO:0016879	ligase activity, forming carbon-nitrogen...	Molecular Function	499	18	ACACA,ATG16L1,CBLB,CDC23,CTPS2,GMPS,HECTD1,HERC3,HERC5,MCCC1,PSMD13,RC3H2,RNF4,SMURF2,TTC3,UBE2D2,UBE3C,UBR2	10.06	0.01271	0.154015
GO:0003924	GTPase activity	Molecular Function	890	28	ACAP2,AGAP1,ARHGAP26,ASAP2,BCAS3,BNIP2,CCZ1,DENND2A,DENND4A,DENND5B,DOCK5,FARP2,FGFR1,GARNL3,GDI2,GSPT1,ITSN1,PRKG1,PSD3,RABGEF1,RAPGEF4,RASA1,RASGRF2,RGS22,RHOT1,SIPA1L2,STXBP5L,TBC1D22A	17.94	0.01313	0.156799
GO:0034212	peptide N-acetyltransferase activity	Molecular Function	70	5	ATF2,KAT2B,NCOA1,PHF20,SAP130	1.41	0.01341	0.157855
GO:0016741	transferase activity, transferring one-c...	Molecular Function	221	10	ASH1L,DPY30,ICMT,KMT2A,KMT2C,METTL15,METTL8,MTR,PRDM6,SETD2	4.45	0.01437	0.15965
GO:0032452	histone demethylase activity	Molecular Function	26	3	KDM3B,KDM5B,KDM5C	0.52	0.01496	0.15965
GO:0098772	molecular function regulator	Molecular Function	1358	39	ABI1,ACAP2,AGAP1,ARHGAP26,ASAP2,BCAS3,BNIP2,CCZ1,CRIM1,DCN,DENND2A,DENND4A,DENND5B,DOCK5,ERCC6,FAF1,FARP2,FGFR1,GARNL3,GDI2,ITSN1,KAT2B,MARK2,PIF1,PRKG1,PRPSAP2,PSD3,RABGEF1,RAPGEF4,RASA1,RASGRF2,RGS22,SCLT1,SERPINE2,SIPA1L2,STK3,STXBP5L,TBC1D22A,UBA2	27.37	0.01546	0.15965
GO:0008641	small protein activating enzyme activity	Molecular Function	10	2	ATG7,UBA2	0.2	0.01637	0.15965
GO:0008565	protein transporter activity	Molecular Function	101	6	COX18,CSE1L,KPNA4,TIMM23B,TSNAX,USO1	2.04	0.01639	0.15965
GO:0001085	RNA polymerase II transcription factor b...	Molecular Function	102	6	ATF2,BBS1,DHX9,MEF2A,MTDH,SPI1	2.06	0.01713	0.15965
GO:0004386	helicase activity	Molecular Function	163	8	CHD2,CHD6,DDX10,DHX9,ERCC6,GTF2F2,MCM9,PIF1	3.28	0.0176	0.15965
GO:0035035	histone acetyltransferase binding	Molecular Function	28	3	BCAS3,GLI3,MEF2A	0.56	0.0183	0.15965
GO:0016874	ligase activity	Molecular Function	678	22	ACACA,ATG16L1,ATG7,CBLB,CDC23,CTPS2,GMPS,HECTD1,HERC3,HERC5,LTN1,MCCC1,PSMD13,RC3H2,RCL1,RNF4,SMURF2,TTC3,UBA2,UBE2D2,UBE3C,UBR2	13.66	0.01935	0.15965
GO:0005487	nucleocytoplasmic transporter activity	Molecular Function	29	3	CSE1L,NUP133,NUP98	0.58	0.02011	0.15965
GO:0000095	S-adenosyl-L-methionine transmembrane tr...	Molecular Function	1	1	SLC25A26	0.02	0.02015	0.15965
GO:0003921	GMP synthase activity	Molecular Function	1	1	GMPS	0.02	0.02015	0.15965
GO:0003922	GMP synthase (glutamine-hydrolyzing) act...	Molecular Function	1	1	GMPS	0.02	0.02015	0.15965
GO:0004132	dCMP deaminase activity	Molecular Function	1	1	DCTD	0.02	0.02015	0.15965
GO:0004362	glutathione-disulfide reductase activity	Molecular Function	1	1	GSR	0.02	0.02015	0.15965
GO:0004484	mRNA guanylyltransferase activity	Molecular Function	1	1	RNGTT	0.02	0.02015	0.15965
GO:0004671	protein C-terminal S-isoprenylcysteine c...	Molecular Function	1	1	ICMT	0.02	0.02015	0.15965
GO:0004742	dihydrolipoyllysine-residue acetyltransf...	Molecular Function	1	1	DLAT	0.02	0.02015	0.15965
GO:0008118	N-acetyllactosaminide alpha-2,3-sialyltr...	Molecular Function	1	1	ST3GAL3	0.02	0.02015	0.15965
GO:0008120	ceramide glucosyltransferase activity	Molecular Function	1	1	UGCG	0.02	0.02015	0.15965
GO:0008444	CDP-diacylglycerol-glycerol-3-phosphate ...	Molecular Function	1	1	PGS1	0.02	0.02015	0.15965
GO:0008495	protoheme IX farnesyltransferase activit...	Molecular Function	1	1	COX10	0.02	0.02015	0.15965
GO:0008705	methionine synthase activity	Molecular Function	1	1	MTR	0.02	0.02015	0.15965
GO:0019778	Atg12 activating enzyme activity	Molecular Function	1	1	ATG7	0.02	0.02015	0.15965
GO:0019779	Atg8 activating enzyme activity	Molecular Function	1	1	ATG7	0.02	0.02015	0.15965
GO:0030523	dihydrolipoamide S-acyltransferase activ...	Molecular Function	1	1	DLAT	0.02	0.02015	0.15965
GO:0033678	5-3 DNA/RNA helicase activity	Molecular Function	1	1	PIF1	0.02	0.02015	0.15965
GO:0033680	ATP-dependent DNA/RNA helicase activity	Molecular Function	1	1	PIF1	0.02	0.02015	0.15965
GO:0033682	ATP-dependent 5-3 DNA/RNA helicase act...	Molecular Function	1	1	PIF1	0.02	0.02015	0.15965
GO:0034647	histone demethylase activity (H3-trimeth...	Molecular Function	1	1	KDM5B	0.02	0.02015	0.15965
GO:0042084	5-methyltetrahydrofolate-dependent methy...	Molecular Function	1	1	MTR	0.02	0.02015	0.15965
GO:0050355	triphosphatase activity	Molecular Function	1	1	RNGTT	0.02	0.02015	0.15965
GO:0052918	dol-P-Man:Man(8)GlcNAc(2)-PP-Dol alpha-1...	Molecular Function	1	1	ALG9	0.02	0.02015	0.15965
GO:0052926	dol-P-Man:Man(6)GlcNAc(2)-PP-Dol alpha-1...	Molecular Function	1	1	ALG9	0.02	0.02015	0.15965
GO:0003729	mRNA binding	Molecular Function	169	8	CPEB3,LUC7L,PUM1,PUM2,QKI,RBM5,RC3H2,TSN	3.41	0.02136	0.164575
GO:0016773	phosphotransferase activity, alcohol gro...	Molecular Function	1304	37	ABI1,ADNP,CBLB,CDC42BPA,CHEK2,CLK1,CRIM1,DCN,DGKH,ERCC6,FAF1,FGFR1,FPGT-TNNI3K,GRK4,HERC5,KAT2B,LIMK2,LTBP4,MAPK10,MARK2,MERTK,MNAT1,NRK,PANK2,PANK3,PDE5A,PDGFD,PHKB,PIK3CB,PRKACB,PRKDC,PRKG1,RPS6KC1,SQSTM1,STK3,TNNI3K,ZMYM2	26.28	0.02148	0.164575
GO:0005085	guanyl-nucleotide exchange factor activi...	Molecular Function	306	12	CCZ1,DENND2A,DENND4A,DENND5B,DOCK5,FARP2,FGFR1,ITSN1,PSD3,RABGEF1,RAPGEF4,RASGRF2	6.17	0.02169	0.164575
GO:0003677	DNA binding	Molecular Function	2491	64	ADNP,AEBP2,ASH1L,ASXL1,ATF1,ATF2,ATXN1,CALCOCO1,CDK5RAP2,CHD2,CHD6,CREBRF,DENND4A,DHX9,ERCC6,FLI1,FOXK2,GABPA,GLI3,GTF2A1L,GTF2F2,HP1BP3,KAT2B,KDM3B,KDM5B,KDM5C,KMT2A,KMT2C,LRPPRC,MCM9,MEF2A,NCOA1,NFATC3,NFIC,NFYB,PDS5B,PHF20,PIF1,PMS2,POLDIP2,POLI,PRKDC,RABGEF1,RBM5,RC3H2,RFX2,RNF4,SPI1,TDG,TSN,TSNAX,UNG,ZFR,ZMYM2,ZMYM5,ZNF175,ZNF197,ZNF516,ZNF586,ZNF625,ZNF66,ZNF736,ZNF782,ZNF827	50.2	0.02181	0.164575
GO:0004672	protein kinase activity	Molecular Function	1179	34	ABI1,ADNP,CBLB,CDC42BPA,CHEK2,CLK1,CRIM1,DCN,ERCC6,FAF1,FGFR1,FPGT-TNNI3K,GRK4,HERC5,KAT2B,LIMK2,LTBP4,MAPK10,MARK2,MERTK,MNAT1,NRK,PDE5A,PDGFD,PHKB,PIK3CB,PRKACB,PRKDC,PRKG1,RPS6KC1,SQSTM1,STK3,TNNI3K,ZMYM2	23.76	0.02193	0.164575
GO:0043167	ion binding	Molecular Function	6302	145	ABCA10,ABI3BP,ACACA,ACAP2,ADAL,ADAM19,ADNP,AEBP2,AGAP1,ARHGAP26,ASAP2,ASH1L,ASXL1,ATF2,ATP2C1,BNIP2,C2CD5,CBLB,CCZ1,CDC42BPA,CHD2,CHD6,CHEK2,CLK1,CNOT8,CTPS2,CYB5R4,DCTD,DDX10,DENND2A,DENND4A,DENND5B,DGKH,DHX9,DOCK5,ERCC6,ESYT2,FARP2,FBN1,FCHO2,FGFR1,FOXK2,FPGT-TNNI3K,GDI2,GLI3,GMPS,GRK4,GSPT1,GSR,GTF2F2,HECTD1,ITGAL,ITSN1,KDM3B,KDM5B,KDM5C,KMT2A,KMT2C,LIMK2,LRP4,LTBP4,LTN1,MAN1A2,MAPK10,MARK2,MC…	127	0.02197	0.164575
GO:0004674	protein serine/threonine kinase activity	Molecular Function	810	25	CDC42BPA,CHEK2,CLK1,ERCC6,FGFR1,GRK4,HERC5,KAT2B,LIMK2,LTBP4,MAPK10,MARK2,MNAT1,NRK,PDE5A,PDGFD,PHKB,PIK3CB,PRKACB,PRKDC,PRKG1,RPS6KC1,SQSTM1,STK3,TNNI3K	16.32	0.02286	0.169699
GO:0003678	DNA helicase activity	Molecular Function	54	4	CHD2,DHX9,ERCC6,PIF1	1.09	0.02325	0.170488
GO:0030983	mismatched DNA binding	Molecular Function	12	2	PMS2,TDG	0.24	0.02338	0.170488
GO:0015197	peptide transporter activity	Molecular Function	111	6	COX18,CSE1L,KPNA4,TIMM23B,TSNAX,USO1	2.24	0.02485	0.179618
GO:0035639	purine ribonucleoside triphosphate bindi...	Molecular Function	1799	48	ABCA10,ACACA,AGAP1,ATP2C1,CDC42BPA,CHD2,CHD6,CHEK2,CLK1,CTPS2,DDX10,DGKH,DHX9,ERCC6,FGFR1,FPGT-TNNI3K,GMPS,GRK4,GSPT1,GTF2F2,LIMK2,MAPK10,MARK2,MCCC1,MCM9,MERTK,NRK,PANK2,PANK3,PDS5B,PGS1,PIF1,PIK3CB,PMS2,PRKACB,PRKDC,PRKG1,RHOT1,RNGTT,RPS6KC1,SMC3,SPAST,STK3,TNNI3K,UBA2,UBE2D2,VWA8,YME1L1	36.25	0.02575	0.184504
GO:0030295	protein kinase activator activity	Molecular Function	56	4	ABI1,ERCC6,MARK2,STK3	1.13	0.02618	0.185968
GO:0005488	binding	Molecular Function	13004	275	ABCA10,ABI1,ABI3BP,ACACA,ACAP2,ADAL,ADAM19,ADNP,AEBP2,AGAP1,AHI1,ANKRD13C,ANKS1B,APBB2,APPBP2,ARHGAP26,ASAP2,ASH1L,ASXL1,ATF1,ATF2,ATG16L1,ATG7,ATP2C1,ATRIP,ATXN1,ATXN3,BBS1,BCAS3,BCKDHB,BNIP2,C2CD5,CALCOCO1,CAMLG,CAPN7,CBLB,CCSER2,CCZ1,CD302,CDC23,CDC42BPA,CDK5RAP2,CELF2,CEP192,CHD2,CHD6,CHEK2,CLASP1,CLIP4,CLK1,CLNS1A,CLUAP1,CMTM3,CNOT8,CNTN1,CPEB3,CPSF2,CREBRF,CRIM1,CSE1L,CTPS2,CYB5R4,CYFIP2,DC…	262.06	0.02912	0.205084
GO:0032451	demethylase activity	Molecular Function	34	3	KDM3B,KDM5B,KDM5C	0.69	0.03061	0.213751
GO:0032183	SUMO binding	Molecular Function	14	2	RNF4,TDG	0.28	0.0314	0.217202
GO:0019207	kinase regulator activity	Molecular Function	183	8	ABI1,DCN,ERCC6,FAF1,ITSN1,KAT2B,MARK2,STK3	3.69	0.03227	0.217202
GO:0000987	core promoter proximal region sequence-s...	Molecular Function	365	13	AEBP2,FLI1,FOXK2,GABPA,GLI3,MEF2A,NFATC3,NFIC,RFX2,SPI1,ZNF516,ZNF66,ZNF736	7.36	0.03428	0.217202
GO:0008080	N-acetyltransferase activity	Molecular Function	90	5	ATF2,KAT2B,NCOA1,PHF20,SAP130	1.81	0.03532	0.217202
GO:0019104	DNA N-glycosylase activity	Molecular Function	15	2	TDG,UNG	0.3	0.03576	0.217202
GO:0001159	core promoter proximal region DNA bindin...	Molecular Function	368	13	AEBP2,FLI1,FOXK2,GABPA,GLI3,MEF2A,NFATC3,NFIC,RFX2,SPI1,ZNF516,ZNF66,ZNF736	7.42	0.03624	0.217202
GO:0004003	ATP-dependent DNA helicase activity	Molecular Function	37	3	CHD2,DHX9,PIF1	0.75	0.03804	0.217202
GO:0019003	GDP binding	Molecular Function	372	13	CCZ1,DENND2A,DENND4A,DENND5B,DOCK5,FARP2,FGFR1,GDI2,ITSN1,PSD3,RABGEF1,RAPGEF4,RASGRF2	7.5	0.03897	0.217202
GO:0000991	transcription factor activity, core RNA ...	Molecular Function	2	1	GTF2F2	0.04	0.0399	0.217202
GO:0003826	alpha-ketoacid dehydrogenase activity	Molecular Function	2	1	BCKDHB	0.04	0.0399	0.217202
GO:0003835	beta-galactoside alpha-2,6-sialyltransfe...	Molecular Function	2	1	ST6GAL2	0.04	0.0399	0.217202
GO:0003863	3-methyl-2-oxobutanoate dehydrogenase (2...	Molecular Function	2	1	BCKDHB	0.04	0.0399	0.217202
GO:0003880	protein C-terminal carboxyl O-methyltran...	Molecular Function	2	1	ICMT	0.04	0.0399	0.217202
GO:0003883	CTP synthase activity	Molecular Function	2	1	CTPS2	0.04	0.0399	0.217202
GO:0003963	RNA-3-phosphate cyclase activity	Molecular Function	2	1	RCL1	0.04	0.0399	0.217202
GO:0003989	acetyl-CoA carboxylase activity	Molecular Function	2	1	ACACA	0.04	0.0399	0.217202
GO:0004473	malate dehydrogenase (decarboxylating) (...	Molecular Function	2	1	ME3	0.04	0.0399	0.217202
GO:0004485	methylcrotonoyl-CoA carboxylase activity	Molecular Function	2	1	MCCC1	0.04	0.0399	0.217202
GO:0004615	phosphomannomutase activity	Molecular Function	2	1	PMM2	0.04	0.0399	0.217202
GO:0004651	polynucleotide 5-phosphatase activity	Molecular Function	2	1	RNGTT	0.04	0.0399	0.217202
GO:0004692	cGMP-dependent protein kinase activity	Molecular Function	2	1	PRKG1	0.04	0.0399	0.217202
GO:0004795	threonine synthase activity	Molecular Function	2	1	THNSL2	0.04	0.0399	0.217202
GO:0005093	Rab GDP-dissociation inhibitor activity	Molecular Function	2	1	GDI2	0.04	0.0399	0.217202
GO:0008263	pyrimidine-specific mismatch base pair D...	Molecular Function	2	1	TDG	0.04	0.0399	0.217202
GO:0008898	S-adenosylmethionine-homocysteine S-meth...	Molecular Function	2	1	MTR	0.04	0.0399	0.217202
GO:0010698	acetyltransferase activator activity	Molecular Function	2	1	BCAS3	0.04	0.0399	0.217202
GO:0016418	S-acetyltransferase activity	Molecular Function	2	1	DLAT	0.04	0.0399	0.217202
GO:0017116	single-stranded DNA-dependent ATP-depend...	Molecular Function	2	1	PIF1	0.04	0.0399	0.217202
GO:0019948	SUMO activating enzyme activity	Molecular Function	2	1	UBA2	0.04	0.0399	0.217202
GO:0033142	progesterone receptor binding	Molecular Function	2	1	NCOA1	0.04	0.0399	0.217202
GO:0033677	DNA/RNA helicase activity	Molecular Function	2	1	PIF1	0.04	0.0399	0.217202
GO:0071424	rRNA (cytosine-N4-)-methyltransferase ac...	Molecular Function	2	1	METTL15	0.04	0.0399	0.217202
GO:0090541	MIT domain binding	Molecular Function	2	1	CAPN7	0.04	0.0399	0.217202
GO:0016301	kinase activity	Molecular Function	1411	38	ABI1,ADNP,CBLB,CDC42BPA,CHEK2,CLK1,CRIM1,DCN,DGKH,ERCC6,FAF1,FGFR1,FPGT-TNNI3K,GRK4,HERC5,ITSN1,KAT2B,LIMK2,LTBP4,MAPK10,MARK2,MERTK,MNAT1,NRK,PANK2,PANK3,PDE5A,PDGFD,PHKB,PIK3CB,PRKACB,PRKDC,PRKG1,RPS6KC1,SQSTM1,STK3,TNNI3K,ZMYM2	28.43	0.04007	0.217202
GO:0072349	modified amino acid transmembrane transp...	Molecular Function	16	2	SLC16A10,SLC25A26	0.32	0.04033	0.217202
GO:0003676	nucleic acid binding	Molecular Function	3362	81	ADNP,AEBP2,ASH1L,ASXL1,ATF1,ATF2,ATXN1,CALCOCO1,CDK5RAP2,CELF2,CHD2,CHD6,CNOT8,CPEB3,CPSF2,CREBRF,DENND4A,DHX9,DKC1,ERCC6,FLI1,FOXK2,GABPA,GLI3,GSPT1,GTF2A1L,GTF2F2,HNRNPM,HP1BP3,KAT2B,KDM3B,KDM5B,KDM5C,KMT2A,KMT2C,LRPPRC,LUC7L,MCM9,MEF2A,MTDH,NCOA1,NFATC3,NFIC,NFYB,NUP98,PDS5B,PHF20,PIF1,PMS2,POLDIP2,POLI,PRDM6,PRKDC,PUM1,PUM2,QKI,RABGEF1,RBM5,RC3H2,RCL1,RFX2,RNF4,SPI1,TDG,TNRC6C,TSEN2,TSN,TSNAX…	67.75	0.04096	0.219163
GO:0005088	Ras guanyl-nucleotide exchange factor ac...	Molecular Function	228	9	DENND2A,DENND4A,DENND5B,FARP2,FGFR1,ITSN1,RABGEF1,RAPGEF4,RASGRF2	4.59	0.04188	0.222639
GO:0016746	transferase activity, transferring acyl ...	Molecular Function	265	10	ATF2,BCAS3,DLAT,KAT2B,KMT2C,NCOA1,PDHX,PHF20,SAP130,ZDHHC20	5.34	0.04277	0.225913
GO:0001077	transcriptional activator activity, RNA ...	Molecular Function	230	9	ATF2,FLI1,FOXK2,GABPA,GLI3,MEF2A,NFATC3,NFIC,SPI1	4.63	0.04385	0.230143
GO:0003690	double-stranded DNA binding	Molecular Function	781	23	AEBP2,ATF1,ATF2,CHD2,FLI1,FOXK2,GABPA,GLI3,KAT2B,KDM3B,KMT2A,MEF2A,NFATC3,NFIC,PMS2,PRKDC,RFX2,SPI1,TDG,ZNF516,ZNF586,ZNF66,ZNF736	15.74	0.04446	0.231867
GO:0030296	protein tyrosine kinase activator activi...	Molecular Function	17	2	ABI1,ERCC6	0.34	0.04511	0.232317
GO:0030553	cGMP binding	Molecular Function	17	2	PDE5A,PRKG1	0.34	0.04511	0.232317
GO:0047485	protein N-terminus binding	Molecular Function	97	5	DCN,ERCC6,MNAT1,NCOA1,SCFD1	1.95	0.04634	0.237169
GO:0000978	RNA polymerase II core promoter proximal...	Molecular Function	346	12	AEBP2,FLI1,FOXK2,GABPA,GLI3,MEF2A,NFATC3,NFIC,RFX2,SPI1,ZNF66,ZNF736	6.97	0.04836	0.245431
GO:0019887	protein kinase regulator activity	Molecular Function	164	7	ABI1,DCN,ERCC6,FAF1,KAT2B,MARK2,STK3	3.3	0.04855	0.245431
GO:0003712	transcription cofactor activity	Molecular Function	543	17	AEBP2,ASXL1,ATF2,CALCOCO1,GABPA,GTF2A1L,KAT2B,KDM5B,MED13,MEF2A,MTDH,NCOA1,RNF4,SAP130,SCAI,TDG,TDRD3	10.94	0.04893	0.245843
