# Supplementary material for: Identification and characterization of human ovary-derived circular RNAs and their potential roles in ovarian aging
Source: Aging (Albany NY). 2018 Sep 23;10(9):2511–34. doi: 10.18632/aging.101565 (PMC6188495; doi:10.18632/aging.101565)
Supplement: Supplementary Table S4 [file aging-10-101565-s005.xlsx]

## Sheet: 工作表1
Pathway ID	Pathway Name	Pathway Class	Annotated	Significant	Symbol List	Expected	Classic Fisher Value	FDR
hsa05166	HTLV-I infection	Infectious diseases: Viral	261	12	CDC23,NFYB,SPI1,NFATC3,PRKACB,PIK3CB,ATF2,MAPK10,ATF1,CHEK2,ITGAL,KAT2B	4.85581	0.00319095	0.561608
hsa04141	Protein processing in endoplasmic reticulum	Folding, sorting and degradation	164	8	SEC23A,STT3A,ATXN3,SEC24B,TRAM1,UBE2D2,MAPK10,MAN1A2	3.05116	0.0110716	0.596916
hsa00510	N-Glycan biosynthesis	Glycan biosynthesis and metabolism	48	4	STT3A,ALG9,ST6GAL2,MAN1A2	0.893023	0.0117916	0.596916
hsa04120	Ubiquitin mediated proteolysis	Folding, sorting and degradation	137	7	UBA2,CBLB,CDC23,HERC3,UBE3C,UBE2D2,SMURF2	2.54884	0.0135663	0.596916
hsa00770	Pantothenate and CoA biosynthesis	Metabolism of cofactors and vitamins	17	2	PANK2,PANK3	0.316279	0.0389031	0.832325
hsa00620	Pyruvate metabolism	Carbohydrate metabolism	41	3	ME3,ACACA,DLAT	0.762791	0.0400912	0.832325
hsa03022	Basal transcription factors	Transcription	44	3	GTF2F2,MNAT1,GTF2A1L	0.818605	0.0478708	0.832325
hsa04810	Regulation of actin cytoskeleton	Cell motility	211	8	PDGFD,FGFR1,PIK3CB,CYFIP2,ITGB5,ITGAL,LIMK2,NCKAP1	3.92558	0.042299	0.832325
hsa04910	Insulin signaling pathway	Endocrine system	137	6	CBLB,ACACA,PRKACB,PIK3CB,MAPK10,PHKB	2.54884	0.0418809	0.832325
