# Supplementary material for: Identification and characterization of human ovary-derived circular RNAs and their potential roles in ovarian aging
Source: Aging (Albany NY). 2018 Sep 23;10(9):2511–34. doi: 10.18632/aging.101565 (PMC6188495; doi:10.18632/aging.101565)
Supplement: Supplementary Table S5 [file aging-10-101565-s006.xlsx]

## Sheet: cirRNA_and_mRNA_with_miRNA_filt
ceRNA_id	mRNA_id	Total_num_of_miRNAs_in_Reference	Num_of_miRNAs_in_ceRNA	Num_of_miRNAs_in_mRNA	Num_of_miRNAs_in_ceRNA_and_mRNA	Shared_miRNAs	Shared_miRNA_Pvalue	Shared_miRNA_FDR	EnrichScore
11:13413530|13445181//ENST00000525108	ENST00000469384	2588	17	4	2	hsa-miR-5187-5p,hsa-miR-6757-5p	0.000241877	0.00347606	76.1176
11:13413530|13445181//ENST00000527102	ENST00000469384	2588	14	4	2	hsa-miR-5187-5p,hsa-miR-6757-5p	0.000162095	0.00251686	92.4286
11:13413530|13445181//ENST00000278174	ENST00000469384	2588	17	4	2	hsa-miR-5187-5p,hsa-miR-6757-5p	0.000241877	0.00347606	76.1176
3:195306511|195336976//ENST00000439758	ENST00000318023	2588	7	30	3	hsa-miR-1254,hsa-miR-3116,hsa-miR-6792-5p	4.77198e-05	0.000919057	36.9714
3:195306511|195336976//ENST00000326793	ENST00000318023	2588	7	30	3	hsa-miR-1254,hsa-miR-3116,hsa-miR-6792-5p	4.77198e-05	0.000919057	36.9714
6:80167678|80203212//ENST00000320393	ENST00000318023	2588	16	30	4	hsa-miR-1254,hsa-miR-4298,hsa-miR-6076,hsa-miR-6875-3p	2.42743e-05	0.000520705	21.5667
3:195306511|195336976//ENST00000635383	ENST00000318023	2588	7	30	3	hsa-miR-1254,hsa-miR-3116,hsa-miR-6792-5p	4.77198e-05	0.000919057	36.9714
6:17507169|17513954//ENST00000229922	ENST00000476098	2588	12	27	3	hsa-miR-4632-5p,hsa-miR-4763-3p,hsa-miR-6879-5p	0.000209419	0.00309688	23.963
19:43497118|43497876//ENST00000292140	ENST00000476098	2588	29	27	7	hsa-miR-1254,hsa-miR-149-5p,hsa-miR-298,hsa-miR-3176,hsa-miR-3191-5p,hsa-miR-4254,hsa-miR-6791-5p	7.79494e-09	4.43928e-07	23.1367
9:86033282|86040868//ENST00000388711	ENST00000376760	2588	57	2	2	hsa-miR-4526,hsa-miR-6734-3p	0.000476763	0.00597177	45.4035
22:24302195|24313466//ENST00000314328	ENST00000612651	2588	17	43	7	hsa-miR-1207-5p,hsa-miR-1909-3p,hsa-miR-4763-3p,hsa-miR-6721-5p,hsa-miR-6722-3p,hsa-miR-6743-5p,hsa-miR-7150	3.62158e-09	2.22499e-07	24.7825
2:31917926|31932135//ENST00000295065	ENST00000612651	2588	9	43	3	hsa-miR-423-5p,hsa-miR-6743-5p,hsa-miR-7152-5p	0.000334973	0.00451637	20.062
9:122989297|122990213//ENST00000373647	ENST00000374879	2588	9	9	2	hsa-miR-34a-5p,hsa-miR-34b-5p	0.000382281	0.00501236	63.9012
2:241407537|241431774//ENST00000264042	ENST00000374879	2588	17	9	3	hsa-miR-2682-5p,hsa-miR-34a-5p,hsa-miR-449c-5p	1.93172e-05	0.000429621	50.7451
17:78392476|78398351//ENST00000589426	ENST00000374879	2588	28	9	3	hsa-miR-2682-5p,hsa-miR-34b-5p,hsa-miR-449c-5p	9.12902e-05	0.00157409	30.8095
17:63193991|63200957//ENST00000389520	ENST00000374879	2588	34	9	3	hsa-miR-2682-5p,hsa-miR-34a-5p,hsa-miR-449c-5p	0.000165009	0.00255372	25.3725
14:105252507|105272894//ENST00000327359	ENST00000374879	2588	21	9	4	hsa-miR-2682-5p,hsa-miR-34a-5p,hsa-miR-34b-5p,hsa-miR-449c-5p	3.93854e-07	1.4687e-05	54.7725
15:94356137|94402019//ENST00000557742	ENST00000374879	2588	34	9	3	hsa-miR-2682-5p,hsa-miR-449c-5p,hsa-miR-7161-3p	0.000165009	0.00255372	25.3725
13:41761128|41833531//ENST00000281496	ENST00000374879	2588	41	9	4	hsa-miR-2682-5p,hsa-miR-34a-5p,hsa-miR-34b-5p,hsa-miR-449c-5p	6.45956e-06	0.000168643	28.0542
22:38636451|38639724//ENST00000355830	ENST00000374879	2588	8	9	2	hsa-miR-2682-5p,hsa-miR-34b-5p	0.000297867	0.00410959	71.8889
1:155370504|155370983//ENST00000368346	ENST00000374879	2588	12	9	2	hsa-miR-2682-5p,hsa-miR-34b-5p	0.000697058	0.00803827	47.9259
15:94356137|94402019//ENST00000357742	ENST00000374879	2588	34	9	3	hsa-miR-2682-5p,hsa-miR-449c-5p,hsa-miR-7161-3p	0.000165009	0.00255372	25.3725
9:84702159|84710791//ENST00000277120	ENST00000374879	2588	10	9	3	hsa-miR-2682-5p,hsa-miR-34b-5p,hsa-miR-449c-5p	3.45082e-06	9.81505e-05	86.2667
11:118758774|118763306//ENST00000526070	ENST00000374879	2588	8	9	2	hsa-miR-34a-5p,hsa-miR-449c-5p	0.000297867	0.00410959	71.8889
2:220753613|220776862//XLOC.113846.1	ENST00000374879	2588	29	9	4	hsa-miR-2682-5p,hsa-miR-34a-5p,hsa-miR-34b-5p,hsa-miR-449c-5p	1.54362e-06	4.8743e-05	39.6628
22:38636451|38639724//ENST00000544346	ENST00000374879	2588	10	9	2	hsa-miR-2682-5p,hsa-miR-34b-5p	0.000476988	0.00597324	57.5111
15:49235851|49239367//ENST00000327171	ENST00000374879	2588	4	9	2	hsa-miR-2682-5p,hsa-miR-449c-5p	6.42916e-05	0.0011777	143.778
5:157518823|157537991//ENST00000257527	ENST00000263817	2588	19	21	4	hsa-miR-204-5p,hsa-miR-211-5p,hsa-miR-4663,hsa-miR-5006-3p	1.14923e-05	0.000276074	25.9449
6:83934595|83936376//ENST00000369681	ENST00000303395	2588	3	41	2	hsa-miR-103a-3p,hsa-miR-107	0.000727471	0.00831216	42.0813
11:128758115|128768272//ENST00000527767	ENST00000303395	2588	21	41	7	hsa-miR-185-3p,hsa-miR-3689a-3p,hsa-miR-3689b-3p,hsa-miR-3689c,hsa-miR-6779-5p,hsa-miR-6785-5p,hsa-miR-6883-5p	1.45206e-08	7.77291e-07	21.0407
1:32633645|32634792//ENST00000473294	ENST00000492843	2588	8	15	2	hsa-miR-4691-5p,hsa-miR-6792-3p	0.00086074	0.00946676	43.1333
1:32633645|32634792//ENST00000436661	ENST00000492843	2588	8	15	2	hsa-miR-4691-5p,hsa-miR-6792-3p	0.00086074	0.00946676	43.1333
4:150588048|150599131//ENST00000507224	ENST00000246672	2588	15	36	5	hsa-miR-3934-3p,hsa-miR-6762-5p,hsa-miR-6805-5p,hsa-miR-6845-5p,hsa-miR-765	1.06234e-06	3.51446e-05	23.963
6:158448996|158452268//ENST00000367094	ENST00000246672	2588	19	36	6	hsa-miR-149-3p,hsa-miR-4640-5p,hsa-miR-4728-5p,hsa-miR-6785-5p,hsa-miR-6825-5p,hsa-miR-6883-5p	1.11825e-07	4.81231e-06	22.7018
4:150588048|150599131//ENST00000357115	ENST00000246672	2588	15	36	5	hsa-miR-3934-3p,hsa-miR-6762-5p,hsa-miR-6805-5p,hsa-miR-6845-5p,hsa-miR-765	1.06234e-06	3.51446e-05	23.963
11:18564892|18578808//ENST00000320750	ENST00000246672	2588	9	36	3	hsa-miR-4723-5p,hsa-miR-5698,hsa-miR-7111-5p	0.000196197	0.00293913	23.963
1:35470863|35479212//ENST00000431916	ENST00000246672	2588	13	36	4	hsa-miR-1249-5p,hsa-miR-4665-5p,hsa-miR-6133,hsa-miR-6797-5p	2.06499e-05	0.000454503	22.1197
15:41085369|41087682//ENST00000361937	ENST00000246672	2588	13	36	4	hsa-miR-4723-5p,hsa-miR-5698,hsa-miR-6798-5p,hsa-miR-6825-5p	2.06499e-05	0.000454503	22.1197
4:39898389|39904191//ENST00000303538	ENST00000246672	2588	9	36	3	hsa-miR-1275,hsa-miR-4665-5p,hsa-miR-6796-5p	0.000196197	0.00293913	23.963
3:105670233|105685466//ENST00000394030	ENST00000246672	2588	33	36	11	hsa-miR-1249-5p,hsa-miR-4665-5p,hsa-miR-4723-5p,hsa-miR-4728-5p,hsa-miR-5698,hsa-miR-6785-5p,hsa-miR-6797-5p,hsa-miR-6825-5p,hsa-miR-6870-5p,hsa-miR-6883-5p,hsa-miR-7111-5p	1.11603e-13	1.69676e-11	23.963
4:3186597|3189093//ENST00000355072	ENST00000246672	2588	17	36	6	hsa-miR-1249-5p,hsa-miR-185-5p,hsa-miR-4644,hsa-miR-6133,hsa-miR-6797-5p,hsa-miR-7106-5p	5.20407e-08	2.43246e-06	25.3725
1:35405023|35405468//ENST00000314607	ENST00000402965	2588	13	27	3	hsa-miR-1343-3p,hsa-miR-4448,hsa-miR-6783-3p	0.000270352	0.00380188	22.1197
6:83934595|83936376//ENST00000369681	ENST00000402965	2588	3	27	2	hsa-miR-103a-3p,hsa-miR-107	0.000312528	0.00427227	63.9012
5:618990|620261//ENST00000264935	ENST00000229922	2588	11	15	3	hsa-miR-4538,hsa-miR-5092,hsa-miR-6081	2.53009e-05	0.000539388	47.0545
10:102362475|102363798//ENST00000369983	ENST00000229922	2588	24	15	3	hsa-miR-4453,hsa-miR-4538,hsa-miR-7150	0.000296587	0.00409566	21.5667
10:119838535|119842595//ENST00000360003	ENST00000259633	2588	9	36	3	hsa-miR-3187-5p,hsa-miR-5189-5p,hsa-miR-6860	0.000196197	0.00293913	23.963
16:3504720|3512478//ENST00000574369	ENST00000259633	2588	10	36	3	hsa-miR-3064-5p,hsa-miR-3187-5p,hsa-miR-6860	0.000277603	0.00388406	21.5667
12:98773042|98801125//ENST00000547362	ENST00000259633	2588	10	36	3	hsa-miR-3187-5p,hsa-miR-5189-5p,hsa-miR-6860	0.000277603	0.00388406	21.5667
9:112403995|112405722//ENST00000398803	ENST00000299638	2588	8	39	3	hsa-miR-1273g-3p,hsa-miR-4722-3p,hsa-miR-6727-3p	0.000168293	0.00259577	24.8846
7:93291703|93297243//ENST00000305866	ENST00000430095	2588	3	34	2	hsa-miR-3622b-5p,hsa-miR-557	0.000498604	0.00618483	50.7451
13:45411362|45411938//ENST00000310862	ENST00000405659	2588	9	11	2	hsa-miR-3194-5p,hsa-miR-6849-3p	0.000581933	0.00698748	52.2828
4:102906536|102912129//ENST00000503584	ENST00000626172	2588	21	35	6	hsa-miR-4419a,hsa-miR-4510,hsa-miR-4739,hsa-miR-6133,hsa-miR-7106-5p,hsa-miR-922	1.83595e-07	7.47317e-06	21.1265
4:3186597|3189093//ENST00000355072	ENST00000626172	2588	17	35	5	hsa-miR-4419a,hsa-miR-4739,hsa-miR-6127,hsa-miR-6133,hsa-miR-7106-5p	1.85473e-06	5.71961e-05	21.7479
9:79612656|79654075//ENST00000435650	ENST00000425753	2588	38	38	12	hsa-miR-1207-5p,hsa-miR-138-5p,hsa-miR-1909-3p,hsa-miR-2861,hsa-miR-4763-3p,hsa-miR-5001-5p,hsa-miR-6722-3p,hsa-miR-6798-5p,hsa-miR-6805-5p,hsa-miR-6846-5p,hsa-miR-6848-5p,hsa-miR-762	3.12527e-14	5.26624e-12	21.5069
9:79612656|79654075//ENST00000376537	ENST00000425753	2588	38	38	12	hsa-miR-1207-5p,hsa-miR-138-5p,hsa-miR-1909-3p,hsa-miR-2861,hsa-miR-4763-3p,hsa-miR-5001-5p,hsa-miR-6722-3p,hsa-miR-6798-5p,hsa-miR-6805-5p,hsa-miR-6846-5p,hsa-miR-6848-5p,hsa-miR-762	3.12527e-14	5.26624e-12	21.5069
9:79612656|79654075//ENST00000265284	ENST00000425753	2588	32	38	11	hsa-miR-1207-5p,hsa-miR-1909-3p,hsa-miR-2861,hsa-miR-4763-3p,hsa-miR-5001-5p,hsa-miR-6722-3p,hsa-miR-6798-5p,hsa-miR-6805-5p,hsa-miR-6846-5p,hsa-miR-6848-5p,hsa-miR-762	1.48106e-13	2.19948e-11	23.4112
3:98768430|98773983//ENST00000394162	ENST00000539345	2588	10	30	3	hsa-miR-3916,hsa-miR-6758-5p,hsa-miR-6856-5p	0.0001598	0.00248882	25.88
15:75854386|75883424//ENST00000569423	ENST00000378460	2588	6	13	2	hsa-miR-301a-5p,hsa-miR-6780a-3p	0.000345559	0.0046293	66.359
15:75854386|75883424//ENST00000267938	ENST00000378460	2588	8	13	2	hsa-miR-301a-5p,hsa-miR-6780a-3p	0.000641392	0.00753621	49.7692
18:56717964|56758953//ENST00000254442	ENST00000318317	2588	41	3	2	hsa-miR-5006-3p,hsa-miR-5193	0.000727471	0.00831216	42.0813
22:32237244|32254213//ENST00000266086	ENST00000464560	2588	31	9	3	hsa-miR-6127,hsa-miR-6129,hsa-miR-6760-5p	0.000124603	0.00203101	27.828
12:31423597|31426424//ENST00000389082	ENST00000464560	2588	10	9	2	hsa-miR-214-3p,hsa-miR-3619-5p	0.000476988	0.00597324	57.5111
4:109530289|109531522//ENST00000265175	ENST00000464560	2588	12	9	2	hsa-miR-6127,hsa-miR-6129	0.000697058	0.00803827	47.9259
11:47815479|47819458//ENST00000378460	ENST00000464560	2588	13	9	2	hsa-miR-214-3p,hsa-miR-3619-5p	0.000822309	0.00913863	44.2393
1:25448808|25456831//ENST00000374343	ENST00000464560	2588	11	9	2	hsa-miR-3619-5p,hsa-miR-6760-5p	0.000581933	0.00698748	52.2828
17:16098367|16101805//ENST00000395848	ENST00000464560	2588	39	9	3	hsa-miR-6127,hsa-miR-6129,hsa-miR-6760-5p	0.000249809	0.00356668	22.1197
7:130945720|131052555//ENST00000431189	ENST00000430193	2588	11	34	3	hsa-miR-1183,hsa-miR-1236-3p,hsa-miR-508-5p	0.000318332	0.00433471	20.7594
2:99418828|99435941//ENST00000258428	ENST00000626778	2588	17	24	4	hsa-miR-18b-5p,hsa-miR-30c-2-3p,hsa-miR-4757-5p,hsa-miR-6788-5p	1.25092e-05	0.000296726	25.3725
X:32216916|32310276//ENST00000357033	ENST00000626778	2588	7	24	3	hsa-miR-30c-1-3p,hsa-miR-30c-2-3p,hsa-miR-8085	2.39566e-05	0.000514968	46.2143
1:151088190|151107222//ENST00000368916	ENST00000626778	2588	16	24	3	hsa-miR-3922-3p,hsa-miR-6878-3p,hsa-miR-6894-5p	0.000362809	0.00480938	20.2188
2:99418828|99435941//ENST00000393445	ENST00000626778	2588	17	24	4	hsa-miR-18b-5p,hsa-miR-30c-2-3p,hsa-miR-4757-5p,hsa-miR-6788-5p	1.25092e-05	0.000296726	25.3725
13:95177707|95188542//ENST00000376887	ENST00000626778	2588	15	24	3	hsa-miR-3160-5p,hsa-miR-4685-5p,hsa-miR-6837-5p	0.000296587	0.00409566	21.5667
2:99412731|99435941//ENST00000393445	ENST00000626778	2588	20	24	4	hsa-miR-18b-5p,hsa-miR-30c-2-3p,hsa-miR-4757-5p,hsa-miR-6788-5p	2.49946e-05	0.00053399	21.5667
2:99412731|99435941//ENST00000258428	ENST00000626778	2588	20	24	4	hsa-miR-18b-5p,hsa-miR-30c-2-3p,hsa-miR-4757-5p,hsa-miR-6788-5p	2.49946e-05	0.00053399	21.5667
X:32287529|32310276//ENST00000357033	ENST00000626778	2588	7	24	3	hsa-miR-30c-1-3p,hsa-miR-30c-2-3p,hsa-miR-8085	2.39566e-05	0.000514968	46.2143
5:74834426|74841679//ENST00000389156	ENST00000393717	2588	12	64	6	hsa-miR-106a-5p,hsa-miR-106b-5p,hsa-miR-17-5p,hsa-miR-20a-5p,hsa-miR-20b-5p,hsa-miR-7110-3p	1.48593e-07	6.19397e-06	20.2188
6:70475410|70502791//ENST00000194672	ENST00000263339	2588	17	20	3	hsa-miR-323b-5p,hsa-miR-410-5p,hsa-miR-7154-5p	0.000250679	0.00357646	22.8353
15:48596283|48613092//ENST00000316623	ENST00000263339	2588	19	20	3	hsa-miR-323b-5p,hsa-miR-410-5p,hsa-miR-4476	0.000353703	0.00471303	20.4316
X:73577407|73584572//ENST00000373502	ENST00000395451	2588	8	8	2	hsa-miR-3130-5p,hsa-miR-4482-5p	0.000232034	0.00336182	80.875
13:20064451|20083032//ENST00000382870	ENST00000395451	2588	11	8	3	hsa-miR-3130-5p,hsa-miR-3614-5p,hsa-miR-4482-5p	3.16509e-06	9.10627e-05	88.2273
X:73577407|73584572//ENST00000498318	ENST00000395451	2588	12	8	2	hsa-miR-3130-5p,hsa-miR-4482-5p	0.000543558	0.00662275	53.9167
11:34931404|34960518//ENST00000227868	ENST00000354276	2588	15	25	3	hsa-miR-2467-5p,hsa-miR-766-3p,hsa-miR-874-3p	0.000335855	0.00452468	20.704
15:50300789|50304133//ENST00000220429	ENST00000354276	2588	13	25	3	hsa-miR-197-3p,hsa-miR-216a-3p,hsa-miR-6081	0.000213826	0.00314898	23.8892
15:50300789|50304133//ENST00000359031	ENST00000354276	2588	13	25	3	hsa-miR-197-3p,hsa-miR-216a-3p,hsa-miR-6081	0.000213826	0.00314898	23.8892
5:32414969|32417792//ENST00000265069	ENST00000536323	2588	30	14	7	hsa-miR-378a-3p,hsa-miR-378b,hsa-miR-378c,hsa-miR-378d,hsa-miR-378e,hsa-miR-378f,hsa-miR-378h	4.32192e-11	3.99107e-09	43.1333
11:120476661|120477526//ENST00000356641	ENST00000536323	2588	13	14	5	hsa-miR-378a-3p,hsa-miR-378c,hsa-miR-378d,hsa-miR-378e,hsa-miR-378f	2.61198e-09	1.65594e-07	71.0989
13:40940921|40941370//ENST00000239882	ENST00000536323	2588	24	14	7	hsa-miR-378a-3p,hsa-miR-378b,hsa-miR-378c,hsa-miR-378d,hsa-miR-378e,hsa-miR-378f,hsa-miR-378h	7.45378e-12	8.01236e-10	53.9167
21:33421480|33432871//ENST00000290219	ENST00000536323	2588	41	14	7	hsa-miR-378a-3p,hsa-miR-378b,hsa-miR-378c,hsa-miR-378d,hsa-miR-378e,hsa-miR-378f,hsa-miR-378h	4.64865e-10	3.47299e-08	31.561
19:57778751|57780146//ENST00000391702	ENST00000536323	2588	39	14	5	hsa-miR-378a-3p,hsa-miR-378b,hsa-miR-378c,hsa-miR-378d,hsa-miR-378h	1.083e-06	3.57337e-05	23.6996
10:45728862|45740246//ENST00000336378	ENST00000536323	2588	18	14	4	hsa-miR-378a-3p,hsa-miR-378c,hsa-miR-378d,hsa-miR-378e	1.57268e-06	4.95362e-05	41.0794
22:46626751|46637960//ENST00000406902	ENST00000536323	2588	20	14	3	hsa-miR-378c,hsa-miR-378f,hsa-miR-378h	0.000136191	0.00218486	27.7286
1:155415744|155459898//ENST00000368346	ENST00000536323	2588	50	14	6	hsa-miR-3185,hsa-miR-378a-3p,hsa-miR-378b,hsa-miR-378c,hsa-miR-378e,hsa-miR-378f	1.02244e-07	4.4436e-06	22.1829
10:50069547|50080931//ENST00000282633	ENST00000536323	2588	18	14	4	hsa-miR-378a-3p,hsa-miR-378c,hsa-miR-378d,hsa-miR-378e	1.57268e-06	4.95362e-05	41.0794
1:12299202|12308641//ENST00000011700	ENST00000536323	2588	47	14	6	hsa-miR-378a-3p,hsa-miR-378c,hsa-miR-378d,hsa-miR-378e,hsa-miR-378f,hsa-miR-378h	6.96476e-08	3.15684e-06	23.5988
14:66965191|67023675//ENST00000543237	ENST00000536323	2588	33	14	6	hsa-miR-378a-3p,hsa-miR-378c,hsa-miR-378d,hsa-miR-378e,hsa-miR-378f,hsa-miR-378h	7.45922e-09	4.26688e-07	33.6104
10:84417771|84477664//ENST00000494144	ENST00000536323	2588	15	14	3	hsa-miR-378b,hsa-miR-378c,hsa-miR-378h	5.52341e-05	0.00103807	36.9714
4:102906536|102912129//ENST00000503584	ENST00000536323	2588	21	14	4	hsa-miR-4419a,hsa-miR-4510,hsa-miR-4739,hsa-miR-6133	3.04741e-06	8.8122e-05	35.2109
10:84417771|84477664//ENST00000224756	ENST00000536323	2588	20	14	3	hsa-miR-378b,hsa-miR-378c,hsa-miR-378h	0.000136191	0.00218486	27.7286
14:66965191|67023675//ENST00000555456	ENST00000536323	2588	29	14	5	hsa-miR-378a-3p,hsa-miR-378b,hsa-miR-378c,hsa-miR-378e,hsa-miR-378f	2.30017e-07	9.1253e-06	31.8719
14:102194938|102209862//ENST00000555879	ENST00000536323	2588	49	14	7	hsa-miR-378a-3p,hsa-miR-378b,hsa-miR-378c,hsa-miR-378d,hsa-miR-378e,hsa-miR-378f,hsa-miR-378h	1.74236e-09	1.14798e-07	26.4082
20:13559008|13580981//ENST00000337743	ENST00000536323	2588	8	14	2	hsa-miR-4739,hsa-miR-766-5p	0.000747132	0.00847956	46.2143
4:3186597|3189093//ENST00000355072	ENST00000536323	2588	17	14	3	hsa-miR-4419a,hsa-miR-4739,hsa-miR-6133	8.20209e-05	0.00144	32.6218
22:24302195|24313466//ENST00000314328	ENST00000259335	2588	17	43	6	hsa-miR-1207-5p,hsa-miR-1909-3p,hsa-miR-3591-3p,hsa-miR-4763-3p,hsa-miR-6722-3p,hsa-miR-6743-5p	1.5873e-07	6.56566e-06	21.2421
5:95763508|95788858//ENST00000379982	ENST00000394652	2588	29	22	5	hsa-miR-3187-5p,hsa-miR-5189-5p,hsa-miR-5589-5p,hsa-miR-612,hsa-miR-6860	2.84296e-06	8.29539e-05	20.2821
16:29905788|29906127//ENST00000566693	ENST00000394652	2588	23	22	5	hsa-miR-1913,hsa-miR-2861,hsa-miR-324-3p,hsa-miR-661,hsa-miR-6776-5p	8.32668e-07	2.83959e-05	25.5731
X:154789954|154792285//ENST00000369534	ENST00000394652	2588	16	22	3	hsa-miR-3187-5p,hsa-miR-612,hsa-miR-6860	0.000278146	0.00388996	22.0568
4:94573351|94586444//ENST00000513341	ENST00000394652	2588	17	22	3	hsa-miR-5189-5p,hsa-miR-612,hsa-miR-6860	0.000335889	0.00452468	20.7594
12:106842589|106851594//ENST00000355478	ENST00000394652	2588	11	22	3	hsa-miR-3187-5p,hsa-miR-612,hsa-miR-6860	8.42491e-05	0.0014713	32.0826
10:119838535|119842595//ENST00000360003	ENST00000394652	2588	9	22	4	hsa-miR-3187-5p,hsa-miR-5189-5p,hsa-miR-612,hsa-miR-6860	4.80628e-07	1.75054e-05	52.2828
15:66508841|66521205//ENST00000565627	ENST00000394652	2588	20	22	4	hsa-miR-3187-5p,hsa-miR-5189-5p,hsa-miR-612,hsa-miR-6860	1.73785e-05	0.000392482	23.5273
6:109475399|109476930//ENST00000230122	ENST00000394652	2588	13	22	3	hsa-miR-5189-5p,hsa-miR-612,hsa-miR-6860	0.000144427	0.00229075	27.1469
9:75932379|75986245//ENST00000376752	ENST00000394652	2588	6	22	3	hsa-miR-5189-5p,hsa-miR-612,hsa-miR-6860	1.04981e-05	0.000255452	58.8182
12:98773042|98801125//ENST00000333732	ENST00000394652	2588	11	22	3	hsa-miR-3187-5p,hsa-miR-5189-5p,hsa-miR-6860	8.42491e-05	0.0014713	32.0826
5:95763508|95783963//ENST00000379982	ENST00000394652	2588	27	22	5	hsa-miR-3187-5p,hsa-miR-5189-5p,hsa-miR-5589-5p,hsa-miR-612,hsa-miR-6860	1.95411e-06	5.98492e-05	21.7845
4:94573351|94586444//ENST00000437932	ENST00000394652	2588	11	22	3	hsa-miR-5189-5p,hsa-miR-612,hsa-miR-6860	8.42491e-05	0.0014713	32.0826
9:33068824|33073806//ENST00000397149	ENST00000394652	2588	21	22	4	hsa-miR-3187-5p,hsa-miR-612,hsa-miR-661,hsa-miR-6860	2.13478e-05	0.000467361	22.4069
12:98773042|98801125//ENST00000547362	ENST00000394652	2588	10	22	3	hsa-miR-3187-5p,hsa-miR-5189-5p,hsa-miR-6860	6.16116e-05	0.00113666	35.2909
12:50814010|50814439//ENST00000262053	ENST00000394652	2588	17	22	3	hsa-miR-3187-5p,hsa-miR-5189-5p,hsa-miR-612	0.000335889	0.00452468	20.7594
15:66508841|66521205//ENST00000307897	ENST00000394652	2588	21	22	4	hsa-miR-3187-5p,hsa-miR-5189-5p,hsa-miR-612,hsa-miR-6860	2.13478e-05	0.000467361	22.4069
4:94573351|94586444//ENST00000318007	ENST00000394652	2588	10	22	3	hsa-miR-5189-5p,hsa-miR-612,hsa-miR-6860	6.16116e-05	0.00113666	35.2909
6:130175841|130184623//ENST00000368134	ENST00000394652	2588	19	22	4	hsa-miR-2861,hsa-miR-5589-5p,hsa-miR-6756-5p,hsa-miR-6776-5p	1.39808e-05	0.000326308	24.7656
9:75932379|76027037//ENST00000376752	ENST00000394652	2588	11	22	3	hsa-miR-5189-5p,hsa-miR-612,hsa-miR-6860	8.42491e-05	0.0014713	32.0826
4:94573351|94586444//ENST00000380180	ENST00000394652	2588	17	22	3	hsa-miR-5189-5p,hsa-miR-612,hsa-miR-6860	0.000335889	0.00452468	20.7594
2:183133566|183159652//ENST00000295119	ENST00000394652	2588	14	22	3	hsa-miR-5189-5p,hsa-miR-612,hsa-miR-6860	0.000182804	0.00277578	25.2078
2:185889509|185952902//XLOC.110929.5	ENST00000394652	2588	28	22	5	hsa-miR-3187-5p,hsa-miR-612,hsa-miR-6726-5p,hsa-miR-6860,hsa-miR-920	2.36582e-06	7.06905e-05	21.0065
1:215586495|215595471//ENST00000259154	ENST00000548489	2588	9	5	2	hsa-miR-3692-3p,hsa-miR-4793-5p	0.000106959	0.00179235	115.022
17:20253505|20306082//ENST00000581399	ENST00000548489	2588	22	5	2	hsa-miR-3692-3p,hsa-miR-5196-5p	0.000679436	0.00788438	47.0545
10:119838535|119842595//ENST00000360003	ENST00000622544	2588	9	35	3	hsa-miR-5189-5p,hsa-miR-612,hsa-miR-7114-5p	0.000180163	0.00274359	24.6476
10:68393138|68396881//ENST00000388768	ENST00000622544	2588	10	35	3	hsa-miR-4685-3p,hsa-miR-5189-3p,hsa-miR-6867-3p	0.00025499	0.00362802	22.1829
6:35619096|35642843//ENST00000357266	ENST00000622544	2588	11	35	3	hsa-miR-642a-5p,hsa-miR-6867-3p,hsa-miR-6892-3p	0.000347364	0.00464854	20.1662
17:64562771|64571956//ENST00000262435	ENST00000360718	2588	11	50	5	hsa-miR-3189-3p,hsa-miR-4459,hsa-miR-4695-5p,hsa-miR-650,hsa-miR-665	9.30387e-07	3.1294e-05	23.5273
X:16689450|16702941//ENST00000359276	ENST00000533248	2588	16	2	2	hsa-miR-3690,hsa-miR-4638-3p	3.58468e-05	0.000723162	161.75
20:49090742|49094963//ENST00000262982	ENST00000533248	2588	12	2	2	hsa-miR-3690,hsa-miR-4638-3p	1.97157e-05	0.000437217	215.667
X:32216916|32310276//ENST00000357033	ENST00000249499	2588	7	48	3	hsa-miR-412-3p,hsa-miR-551b-5p,hsa-miR-8085	0.000199052	0.00297269	23.1071
X:32287529|32310276//ENST00000357033	ENST00000249499	2588	7	48	3	hsa-miR-412-3p,hsa-miR-551b-5p,hsa-miR-8085	0.000199052	0.00297269	23.1071
10:86467279|86473973//ENST00000263070	ENST00000591660	2588	22	12	3	hsa-miR-4632-5p,hsa-miR-6735-5p,hsa-miR-6879-5p	0.000111713	0.00185737	29.4091
6:42650284|42652645//ENST00000372899	ENST00000591660	2588	11	12	3	hsa-miR-4632-5p,hsa-miR-6735-5p,hsa-miR-6879-5p	1.23191e-05	0.000292915	58.8182
11:61271675|61274584//ENST00000301770	ENST00000591660	2588	32	12	3	hsa-miR-4632-5p,hsa-miR-6735-5p,hsa-miR-6879-5p	0.000350489	0.00468078	20.2188
16:77353733|77367723//ENST00000282849	ENST00000591660	2588	39	12	4	hsa-miR-1193,hsa-miR-6735-5p,hsa-miR-6770-3p,hsa-miR-7160-5p	2.00112e-05	0.000442727	22.1197
5:113082860|113085310//ENST00000302475	ENST00000221264	2588	26	25	6	hsa-miR-4446-3p,hsa-miR-4498,hsa-miR-4685-5p,hsa-miR-5001-5p,hsa-miR-6837-5p,hsa-miR-762	8.65725e-08	3.82917e-06	23.8892
6:42650284|42652645//ENST00000372899	ENST00000221264	2588	11	25	3	hsa-miR-4632-5p,hsa-miR-6735-5p,hsa-miR-6879-5p	0.00012495	0.00203542	28.2327
13:95177707|95188542//ENST00000376887	ENST00000221264	2588	15	25	3	hsa-miR-4446-3p,hsa-miR-4685-5p,hsa-miR-6837-5p	0.000335855	0.00452468	20.704
5:73058433|73077493//ENST00000430046	ENST00000221264	2588	29	25	7	hsa-miR-4446-3p,hsa-miR-4492,hsa-miR-4498,hsa-miR-5001-5p,hsa-miR-5787,hsa-miR-615-5p,hsa-miR-762	4.2834e-09	2.58831e-07	24.9876
5:73832338|73840760//ENST00000296794	ENST00000221264	2588	13	25	3	hsa-miR-4446-3p,hsa-miR-4498,hsa-miR-5001-5p	0.000213826	0.00314898	23.8892
9:96827080|96852005//ENST00000466833	ENST00000428545	2588	6	20	2	hsa-miR-6731-5p,hsa-miR-8085	0.000835676	0.00925566	43.1333
X:32216916|32310276//ENST00000357033	ENST00000428545	2588	7	20	3	hsa-miR-30c-1-3p,hsa-miR-6731-5p,hsa-miR-8085	1.35564e-05	0.000317784	55.4571
X:32287529|32310276//ENST00000357033	ENST00000428545	2588	7	20	3	hsa-miR-30c-1-3p,hsa-miR-6731-5p,hsa-miR-8085	1.35564e-05	0.000317784	55.4571
10:86467279|86473973//ENST00000263070	ENST00000221992	2588	22	11	3	hsa-miR-1304-3p,hsa-miR-143-5p,hsa-miR-152-3p	8.42491e-05	0.0014713	32.0826
17:37283267|37289528//ENST00000615229	ENST00000221992	2588	8	11	2	hsa-miR-1306-5p,hsa-miR-3934-5p	0.000453667	0.00574205	58.8182
12:56664776|56673065//ENST00000537473	ENST00000221992	2588	26	11	3	hsa-miR-1273f,hsa-miR-1304-3p,hsa-miR-504-3p	0.000140919	0.00224512	27.1469
8:30680904|30700135//ENST00000537535	ENST00000588576	2588	23	27	5	hsa-miR-4651,hsa-miR-6752-5p,hsa-miR-7110-5p,hsa-miR-99a-3p,hsa-miR-99b-3p	2.47916e-06	7.36527e-05	20.8374
1:35470863|35479212//ENST00000431916	ENST00000588576	2588	13	27	3	hsa-miR-1249-5p,hsa-miR-6127,hsa-miR-6133	0.000270352	0.00380188	22.1197
4:3186597|3189093//ENST00000355072	ENST00000588576	2588	17	27	5	hsa-miR-1249-5p,hsa-miR-4739,hsa-miR-6127,hsa-miR-6133,hsa-miR-7106-5p	4.75857e-07	1.73529e-05	28.1917
15:94440176|94458246//ENST00000357742	ENST00000573928	2588	14	5	2	hsa-miR-515-5p,hsa-miR-519d-5p	0.000269324	0.00379063	73.9429
X:40588986|40597664//ENST00000636574	ENST00000573928	2588	24	5	2	hsa-miR-515-5p,hsa-miR-519d-5p	0.000810534	0.00903982	43.1333
5:94888879|94912976//ENST00000312216	ENST00000573928	2588	34	5	3	hsa-miR-1236-3p,hsa-miR-519d-5p,hsa-miR-7111-3p	2.03661e-05	0.000449227	45.6706
X:40588986|40597664//ENST00000378438	ENST00000573928	2588	25	5	2	hsa-miR-515-5p,hsa-miR-519d-5p	0.000880331	0.00963109	41.408
X:40588986|40597664//ENST00000636287	ENST00000573928	2588	24	5	2	hsa-miR-515-5p,hsa-miR-519d-5p	0.000810534	0.00903982	43.1333
2:229774097|229788940//ENST00000283943	ENST00000573928	2588	20	5	2	hsa-miR-515-5p,hsa-miR-519d-5p	0.000559712	0.00677542	51.76
5:74813840|74841679//ENST00000510609	ENST00000421670	2588	11	13	3	hsa-miR-17-5p,hsa-miR-20a-5p,hsa-miR-20b-5p	1.59777e-05	0.000365636	54.2937
5:108946130|108959347//ENST00000281092	ENST00000421670	2588	19	13	4	hsa-miR-17-5p,hsa-miR-20a-5p,hsa-miR-20b-5p,hsa-miR-93-5p	1.42511e-06	4.54434e-05	41.9109
5:74834426|74841679//ENST00000389156	ENST00000421670	2588	12	13	3	hsa-miR-17-5p,hsa-miR-20a-5p,hsa-miR-20b-5p	2.12417e-05	0.000465477	49.7692
7:130170400|130181719//ENST00000397622	ENST00000421670	2588	23	13	3	hsa-miR-17-5p,hsa-miR-20b-5p,hsa-miR-93-5p	0.000165608	0.00256121	25.9666
5:74813840|74841679//ENST00000389156	ENST00000421670	2588	14	13	3	hsa-miR-17-5p,hsa-miR-20a-5p,hsa-miR-20b-5p	3.49414e-05	0.000707903	42.6593
3:65018441|65050822//XLOC.132426.12	ENST00000421670	2588	46	13	6	hsa-miR-17-5p,hsa-miR-20a-5p,hsa-miR-20b-5p,hsa-miR-619-5p,hsa-miR-6747-3p,hsa-miR-93-5p	3.52801e-08	1.71956e-06	25.9666
7:130170400|130181719//ENST00000473456	ENST00000421670	2588	18	13	3	hsa-miR-17-5p,hsa-miR-20b-5p,hsa-miR-93-5p	7.74239e-05	0.00137264	33.1795
7:130173632|130178527//ENST00000397622	ENST00000421670	2588	20	13	3	hsa-miR-17-5p,hsa-miR-20b-5p,hsa-miR-93-5p	0.000107538	0.00179993	29.8615
14:92088730|92096838//ENST00000393287	ENST00000360482	2588	9	18	3	hsa-miR-5196-3p,hsa-miR-6845-3p,hsa-miR-7111-3p	2.31401e-05	0.000500372	47.9259
14:92088730|92096838//ENST00000556315	ENST00000360482	2588	10	18	3	hsa-miR-5196-3p,hsa-miR-6845-3p,hsa-miR-7111-3p	3.29135e-05	0.000672924	43.1333
14:92088730|92096838//ENST00000506466	ENST00000360482	2588	9	18	3	hsa-miR-5196-3p,hsa-miR-6845-3p,hsa-miR-7111-3p	2.31401e-05	0.000500372	47.9259
14:92088730|92096838//ENST00000554350	ENST00000360482	2588	13	18	3	hsa-miR-5196-3p,hsa-miR-6845-3p,hsa-miR-7111-3p	7.74239e-05	0.00137264	33.1795
14:92088730|92096838//ENST00000532032	ENST00000360482	2588	13	18	3	hsa-miR-5196-3p,hsa-miR-6845-3p,hsa-miR-7111-3p	7.74239e-05	0.00137264	33.1795
14:92088730|92096838//ENST00000554592	ENST00000360482	2588	13	18	3	hsa-miR-5196-3p,hsa-miR-6845-3p,hsa-miR-7111-3p	7.74239e-05	0.00137264	33.1795
14:92088730|92096838//ENST00000503767	ENST00000360482	2588	13	18	3	hsa-miR-5196-3p,hsa-miR-6845-3p,hsa-miR-7111-3p	7.74239e-05	0.00137264	33.1795
14:92088730|92096838//ENST00000556374	ENST00000360482	2588	13	18	3	hsa-miR-5196-3p,hsa-miR-6845-3p,hsa-miR-7111-3p	7.74239e-05	0.00137264	33.1795
14:92088730|92096838//ENST00000359366	ENST00000360482	2588	10	18	3	hsa-miR-5196-3p,hsa-miR-6845-3p,hsa-miR-7111-3p	3.29135e-05	0.000672924	43.1333
7:137912991|137916012//ENST00000330387	ENST00000297450	2588	17	21	5	hsa-miR-4483,hsa-miR-608,hsa-miR-6751-5p,hsa-miR-6803-5p,hsa-miR-6842-5p	1.22782e-07	5.22904e-06	36.2465
2:159777938|159783469//ENST00000480212	ENST00000370794	2588	26	33	8	hsa-miR-1827,hsa-miR-4419b,hsa-miR-4459,hsa-miR-4722-5p,hsa-miR-508-5p,hsa-miR-665,hsa-miR-6720-5p,hsa-miR-6884-5p	3.75858e-10	2.86283e-08	24.1305
3:47037666|47067118//ENST00000445387	ENST00000375323	2588	72	8	5	hsa-miR-1237-5p,hsa-miR-3196,hsa-miR-328-5p,hsa-miR-4488,hsa-miR-6816-5p	7.6143e-07	2.62525e-05	22.4653
3:47037666|47067118//ENST00000330022	ENST00000375323	2588	70	8	5	hsa-miR-1237-5p,hsa-miR-3196,hsa-miR-328-5p,hsa-miR-4488,hsa-miR-6816-5p	6.59957e-07	2.3155e-05	23.1071
17:78086503|78087093//ENST00000301624	ENST00000375323	2588	28	8	3	hsa-miR-1237-5p,hsa-miR-3960,hsa-miR-6816-5p	6.13044e-05	0.00113211	34.6607
2:235930765|235968623//ENST00000304032	ENST00000375323	2588	33	8	4	hsa-miR-1237-5p,hsa-miR-328-5p,hsa-miR-4488,hsa-miR-6816-5p	1.48159e-06	4.70252e-05	39.2121
3:57890041|57909150//ENST00000295951	ENST00000345253	2588	7	14	2	hsa-miR-378g,hsa-miR-943	0.000562087	0.0067979	52.8163
3:57890041|57909150//ENST00000459654	ENST00000345253	2588	7	14	2	hsa-miR-378g,hsa-miR-943	0.000562087	0.0067979	52.8163
3:12516611|12532773//ENST00000284995	ENST00000345253	2588	13	14	3	hsa-miR-1587,hsa-miR-3620-5p,hsa-miR-4656	3.49414e-05	0.000707903	42.6593
5:14741827|14758598//ENST00000284268	ENST00000345253	2588	33	14	4	hsa-miR-1587,hsa-miR-3620-5p,hsa-miR-6715b-5p,hsa-miR-943	2.00712e-05	0.000443785	22.4069
1:204116507|204117707//ENST00000272193	ENST00000345253	2588	32	14	4	hsa-miR-1587,hsa-miR-3620-5p,hsa-miR-4656,hsa-miR-4725-3p	1.76934e-05	0.000398471	23.1071
12:31423597|31426424//ENST00000389082	ENST00000399677	2588	10	12	2	hsa-miR-214-3p,hsa-miR-3619-5p	0.000869077	0.00953846	43.1333
22:31258291|31260077//ENST00000331728	ENST00000399677	2588	26	12	3	hsa-miR-214-3p,hsa-miR-339-5p,hsa-miR-3619-5p	0.000186639	0.00282301	24.8846
12:56664776|56673065//ENST00000448157	ENST00000622002	2588	7	37	3	hsa-miR-212-5p,hsa-miR-3187-3p,hsa-miR-6813-3p	9.05813e-05	0.00156418	29.9768
12:56671749|56673065//ENST00000456859	ENST00000622002	2588	6	37	3	hsa-miR-212-5p,hsa-miR-3187-3p,hsa-miR-6813-3p	5.22759e-05	0.000991725	34.973
12:56664776|56673065//ENST00000537473	ENST00000622002	2588	26	37	8	hsa-miR-1273f,hsa-miR-1304-3p,hsa-miR-212-5p,hsa-miR-3187-3p,hsa-miR-504-3p,hsa-miR-5096,hsa-miR-619-5p,hsa-miR-6813-3p	1.01929e-09	7.07282e-08	21.5218
12:56664776|56673065//ENST00000414274	ENST00000622002	2588	10	37	3	hsa-miR-212-5p,hsa-miR-3187-3p,hsa-miR-6813-3p	0.00030148	0.00414905	20.9838
12:56671749|56673065//ENST00000262033	ENST00000622002	2588	6	37	3	hsa-miR-212-5p,hsa-miR-3187-3p,hsa-miR-6813-3p	5.22759e-05	0.000991725	34.973
9:98076918|98078347//ENST00000210444	ENST00000527446	2588	14	26	3	hsa-miR-3135b,hsa-miR-3652,hsa-miR-4430	0.000304701	0.00418428	21.3297
4:128121826|128179512//ENST00000326639	ENST00000382297	2588	27	26	10	hsa-miR-518d-5p,hsa-miR-518e-5p,hsa-miR-518f-5p,hsa-miR-519a-5p,hsa-miR-519b-5p,hsa-miR-519c-5p,hsa-miR-520c-5p,hsa-miR-522-5p,hsa-miR-523-5p,hsa-miR-526a	1.11479e-14	2.03861e-12	36.8661
14:50462665|50486194//ENST00000013125	ENST00000382297	2588	25	26	10	hsa-miR-518d-5p,hsa-miR-518e-5p,hsa-miR-518f-5p,hsa-miR-519a-5p,hsa-miR-519b-5p,hsa-miR-519c-5p,hsa-miR-520c-5p,hsa-miR-522-5p,hsa-miR-523-5p,hsa-miR-526a	4.36879e-15	8.5856e-13	39.8154
17:50736960|50741731//ENST00000507200	ENST00000382297	2588	17	26	11	hsa-miR-383-5p,hsa-miR-518d-5p,hsa-miR-518e-5p,hsa-miR-518f-5p,hsa-miR-519a-5p,hsa-miR-519b-5p,hsa-miR-519c-5p,hsa-miR-520c-5p,hsa-miR-522-5p,hsa-miR-523-5p,hsa-miR-526a	1.08239e-19	4.63187e-17	64.4072
1:64671564|64675983//ENST00000290039	ENST00000382297	2588	44	26	10	hsa-miR-518d-5p,hsa-miR-518e-5p,hsa-miR-518f-5p,hsa-miR-519a-5p,hsa-miR-519b-5p,hsa-miR-519c-5p,hsa-miR-520c-5p,hsa-miR-522-5p,hsa-miR-523-5p,hsa-miR-526a	2.97587e-12	3.44958e-10	22.6224
17:50736960|50741731//ENST00000508045	ENST00000382297	2588	27	26	11	hsa-miR-383-5p,hsa-miR-518d-5p,hsa-miR-518e-5p,hsa-miR-518f-5p,hsa-miR-519a-5p,hsa-miR-519b-5p,hsa-miR-519c-5p,hsa-miR-520c-5p,hsa-miR-522-5p,hsa-miR-523-5p,hsa-miR-526a	1.08068e-16	2.80842e-14	40.5527
5:65579424|65583219//ENST00000261308	ENST00000382297	2588	4	26	2	hsa-miR-331-3p,hsa-miR-4793-3p	0.000575327	0.00692807	49.7692
19:9652953|9660874//ENST00000590155	ENST00000621957	2588	29	8	3	hsa-miR-4490,hsa-miR-6735-5p,hsa-miR-8075	6.82783e-05	0.00123791	33.4655
19:9652953|9660874//ENST00000585688	ENST00000621957	2588	26	8	3	hsa-miR-4490,hsa-miR-6735-5p,hsa-miR-8075	4.87965e-05	0.000936519	37.3269
19:9652953|9660874//ENST00000453372	ENST00000621957	2588	29	8	3	hsa-miR-4490,hsa-miR-6735-5p,hsa-miR-8075	6.82783e-05	0.00123791	33.4655
1:219179147|219211752//ENST00000366928	ENST00000594092	2588	12	43	4	hsa-miR-30b-3p,hsa-miR-3192-5p,hsa-miR-6779-5p,hsa-miR-6780a-5p	2.97262e-05	0.000618073	20.062
16:15776078|15786732//ENST00000300036	ENST00000594092	2588	11	43	4	hsa-miR-1273h-5p,hsa-miR-3689b-3p,hsa-miR-3689c,hsa-miR-7106-5p	2.00594e-05	0.000443581	21.8858
1:219179147|219211752//ENST00000474379	ENST00000594092	2588	10	43	4	hsa-miR-30b-3p,hsa-miR-3192-5p,hsa-miR-6779-5p,hsa-miR-6780a-5p	1.29209e-05	0.000305001	24.0744
1:219179147|219211752//ENST00000477938	ENST00000594092	2588	10	43	4	hsa-miR-30b-3p,hsa-miR-3192-5p,hsa-miR-6779-5p,hsa-miR-6780a-5p	1.29209e-05	0.000305001	24.0744
8:47407861|47440542//ENST00000297423	ENST00000594092	2588	22	43	10	hsa-miR-1249-5p,hsa-miR-1343-3p,hsa-miR-149-3p,hsa-miR-4728-5p,hsa-miR-4739,hsa-miR-6754-5p,hsa-miR-6779-5p,hsa-miR-6780a-5p,hsa-miR-6883-5p,hsa-miR-765	2.95092e-13	4.14555e-11	27.3573
1:100913663|100921841//ENST00000357650	ENST00000594092	2588	12	43	4	hsa-miR-3120-5p,hsa-miR-550a-3-5p,hsa-miR-550a-5p,hsa-miR-550b-2-5p	2.97262e-05	0.000618073	20.062
10:110100625|110112915//ENST00000497125	ENST00000594092	2588	9	43	6	hsa-miR-30b-3p,hsa-miR-3192-5p,hsa-miR-6779-5p,hsa-miR-6780a-5p,hsa-miR-7106-5p,hsa-miR-765	1.18938e-09	8.13159e-08	40.124
7:6814764|6824737//ENST00000411858	ENST00000594092	2588	8	43	3	hsa-miR-4739,hsa-miR-550b-2-5p,hsa-miR-6851-5p	0.000225931	0.00329042	22.5698
1:219179147|219211752//ENST00000463964	ENST00000594092	2588	12	43	4	hsa-miR-30b-3p,hsa-miR-3192-5p,hsa-miR-6779-5p,hsa-miR-6780a-5p	2.97262e-05	0.000618073	20.062
10:110100625|110112915//ENST00000277900	ENST00000594092	2588	10	43	6	hsa-miR-30b-3p,hsa-miR-3192-5p,hsa-miR-6779-5p,hsa-miR-6780a-5p,hsa-miR-7106-5p,hsa-miR-765	2.93691e-09	1.84018e-07	36.1116
1:219179147|219211752//ENST00000460522	ENST00000594092	2588	10	43	4	hsa-miR-30b-3p,hsa-miR-3192-5p,hsa-miR-6779-5p,hsa-miR-6780a-5p	1.29209e-05	0.000305001	24.0744
1:219179147|219211752//ENST00000366927	ENST00000594092	2588	12	43	4	hsa-miR-30b-3p,hsa-miR-3192-5p,hsa-miR-6779-5p,hsa-miR-6780a-5p	2.97262e-05	0.000618073	20.062
13:41727194|41778056//ENST00000281496	ENST00000486556	2588	6	38	3	hsa-miR-3929,hsa-miR-515-5p,hsa-miR-519e-5p	5.67069e-05	0.00106121	34.0526
3:105670233|105685466//ENST00000264122	ENST00000557334	2588	41	8	3	hsa-miR-5187-5p,hsa-miR-6757-5p,hsa-miR-8085	0.000195729	0.0029334	23.6707
11:13413530|13445181//ENST00000527102	ENST00000557334	2588	14	8	2	hsa-miR-5187-5p,hsa-miR-6757-5p	0.000747132	0.00847956	46.2143
7:140702866|140704963//ENST00000247866	ENST00000382510	2588	7	10	2	hsa-miR-204-3p,hsa-miR-4646-5p	0.000279394	0.00390381	73.9429
3:136316941|136329984//ENST00000473073	ENST00000382510	2588	32	10	3	hsa-miR-204-3p,hsa-miR-4640-5p,hsa-miR-4646-5p	0.000194428	0.00291828	24.2625
17:50736960|50741731//ENST00000240304	ENST00000382510	2588	5	10	2	hsa-miR-4640-5p,hsa-miR-4726-5p	0.000133596	0.00214995	103.52
4:109530289|109531522//ENST00000265175	ENST00000577953	2588	12	38	5	hsa-miR-4510,hsa-miR-6127,hsa-miR-6129,hsa-miR-6834-5p,hsa-miR-6856-5p	3.82715e-07	1.43209e-05	28.3772
2:32098796|32116212//ENST00000315285	ENST00000548830	2588	16	23	3	hsa-miR-1238-5p,hsa-miR-4758-5p,hsa-miR-6081	0.000318661	0.00433753	21.0978
2:128097429|128109746//ENST00000259253	ENST00000563290	2588	14	7	2	hsa-miR-4686,hsa-miR-6856-5p	0.000562087	0.0067979	52.8163
15:65715478|65761438//ENST00000431932	ENST00000563290	2588	48	7	3	hsa-miR-4686,hsa-miR-499b-5p,hsa-miR-6856-5p	0.000199052	0.00297269	23.1071
15:65715478|65761438//ENST00000443035	ENST00000563290	2588	48	7	3	hsa-miR-4686,hsa-miR-499b-5p,hsa-miR-6856-5p	0.000199052	0.00297269	23.1071
7:158901739|158906091//ENST00000407559	ENST00000436088	2588	7	48	3	hsa-miR-3064-5p,hsa-miR-6504-5p,hsa-miR-6783-3p	0.000199052	0.00297269	23.1071
11:18564892|18578808//ENST00000320750	ENST00000436088	2588	9	48	4	hsa-miR-4723-5p,hsa-miR-5698,hsa-miR-7111-5p,hsa-miR-939-5p	1.22761e-05	0.000292081	23.963
15:100152612|100155320//ENST00000268070	ENST00000437422	2588	14	4	2	hsa-miR-4440,hsa-miR-6856-5p	0.000162095	0.00251686	92.4286
11:118489792|118493230//ENST00000534358	ENST00000437422	2588	28	4	2	hsa-miR-6758-5p,hsa-miR-6856-5p	0.000668455	0.00778018	46.2143
11:118489792|118493230//ENST00000389506	ENST00000437422	2588	28	4	2	hsa-miR-6758-5p,hsa-miR-6856-5p	0.000668455	0.00778018	46.2143
3:98768430|98773983//ENST00000394162	ENST00000437422	2588	10	4	2	hsa-miR-6758-5p,hsa-miR-6856-5p	8.0323e-05	0.0014153	129.4
3:98768430|98773983//ENST00000265261	ENST00000437422	2588	13	4	2	hsa-miR-6758-5p,hsa-miR-6856-5p	0.000139011	0.00222093	99.5385
2:31917926|31932135//ENST00000295065	ENST00000437422	2588	9	4	2	hsa-miR-6758-5p,hsa-miR-6856-5p	6.42916e-05	0.0011777	143.778
14:66965191|67023675//ENST00000315266	ENST00000437422	2588	25	4	2	hsa-miR-6758-5p,hsa-miR-6856-5p	0.000531346	0.00650577	51.76
11:125602303|125604247//ENST00000392708	ENST00000437422	2588	23	4	2	hsa-miR-6758-5p,hsa-miR-6856-5p	0.000448567	0.00569146	56.2609
3:170454290|170454913//ENST00000488989	ENST00000437422	2588	32	4	2	hsa-miR-298,hsa-miR-6758-5p	0.000875308	0.00959204	40.4375
14:66965191|67023675//ENST00000555456	ENST00000437422	2588	29	4	2	hsa-miR-6758-5p,hsa-miR-6856-5p	0.000717598	0.00822446	44.6207
9:37126312|37127263//ENST00000322831	ENST00000437422	2588	17	4	2	hsa-miR-298,hsa-miR-6758-5p	0.000241877	0.00347606	76.1176
8:30069642|30070059//ENST00000256255	ENST00000541571	2588	16	7	2	hsa-miR-765,hsa-miR-8077	0.000739301	0.00841095	46.2143
X:16667514|16691620//ENST00000359276	ENST00000343534	2588	19	16	3	hsa-miR-449c-5p,hsa-miR-4656,hsa-miR-6859-5p	0.000177013	0.00270488	25.5395
3:98768430|98773983//ENST00000394162	ENST00000333371	2588	10	26	3	hsa-miR-510-5p,hsa-miR-6859-5p,hsa-miR-877-5p	0.000103174	0.00173954	29.8615
3:98768430|98773983//ENST00000265261	ENST00000333371	2588	13	26	3	hsa-miR-510-5p,hsa-miR-6859-5p,hsa-miR-877-5p	0.000241014	0.00346688	22.9704
1:70417937|70424416//ENST00000370938	ENST00000283441	2588	7	58	4	hsa-miR-193b-5p,hsa-miR-6756-5p,hsa-miR-6855-5p,hsa-miR-92a-2-5p	7.57032e-06	0.000193153	25.4975
4:2662838|2672372//ENST00000324666	ENST00000367643	2588	43	8	3	hsa-miR-608,hsa-miR-6812-5p,hsa-miR-6852-5p	0.000225931	0.00329042	22.5698
X:37386599|37426000//ENST00000449135	ENST00000367643	2588	6	8	2	hsa-miR-6812-5p,hsa-miR-6855-5p	0.000124689	0.00203202	107.833
17:32171043|32183272//ENST00000333942	ENST00000367643	2588	15	8	2	hsa-miR-6737-5p,hsa-miR-6812-5p	0.00086074	0.00946676	43.1333
9:122989297|122990213//ENST00000373647	ENST00000367643	2588	9	8	2	hsa-miR-6737-5p,hsa-miR-6812-5p	0.000297867	0.00410959	71.8889
1:64671564|64675983//ENST00000290039	ENST00000367643	2588	44	8	3	hsa-miR-608,hsa-miR-6737-5p,hsa-miR-6812-5p	0.000242108	0.00347828	22.0568
2:160313156|160367391//ENST00000348849	ENST00000367643	2588	37	8	3	hsa-miR-608,hsa-miR-6737-5p,hsa-miR-6812-5p	0.000143503	0.00227902	26.2297
9:122989297|122990213//ENST00000317419	ENST00000367643	2588	15	8	2	hsa-miR-6737-5p,hsa-miR-6812-5p	0.00086074	0.00946676	43.1333
10:12117673|12120267//ENST00000263035	ENST00000394434	2588	8	25	3	hsa-miR-378a-5p,hsa-miR-4747-5p,hsa-miR-5196-5p	4.32291e-05	0.000846095	38.82
3:65018441|65050822//XLOC.132426.12	ENST00000394434	2588	46	25	9	hsa-miR-1304-3p,hsa-miR-373-3p,hsa-miR-378a-5p,hsa-miR-4258,hsa-miR-4772-3p,hsa-miR-619-5p,hsa-miR-6747-3p,hsa-miR-6843-3p,hsa-miR-93-5p	1.29125e-10	1.08328e-08	20.2539
12:56664776|56673065//ENST00000537473	ENST00000394434	2588	26	25	8	hsa-miR-1304-3p,hsa-miR-212-5p,hsa-miR-378a-5p,hsa-miR-4772-3p,hsa-miR-504-3p,hsa-miR-5096,hsa-miR-619-5p,hsa-miR-6813-3p	3.07819e-11	2.92981e-09	31.8523
6:73479732|73480805//ENST00000415228	ENST00000525380	2588	13	20	3	hsa-miR-1229-5p,hsa-miR-197-5p,hsa-miR-3132	0.000107538	0.00179993	29.8615
6:73479732|73480805//ENST00000370308	ENST00000525380	2588	14	20	3	hsa-miR-1229-5p,hsa-miR-197-5p,hsa-miR-3132	0.000136191	0.00218486	27.7286
7:130026158|130049144//ENST00000471022	ENST00000525380	2588	24	20	4	hsa-miR-4700-5p,hsa-miR-5196-5p,hsa-miR-6857-5p,hsa-miR-8089	2.49946e-05	0.00053399	21.5667
2:201565729|201575326//ENST00000286195	ENST00000525380	2588	6	20	2	hsa-miR-4700-5p,hsa-miR-8089	0.000835676	0.00925566	43.1333
12:41014228|41029219//ENST00000347616	ENST00000525380	2588	24	20	4	hsa-miR-4700-5p,hsa-miR-6857-5p,hsa-miR-6875-3p,hsa-miR-8089	2.49946e-05	0.00053399	21.5667
4:109659011|109664394//ENST00000394650	ENST00000394199	2588	5	54	3	hsa-miR-4647,hsa-miR-6815-5p,hsa-miR-6865-5p	8.34334e-05	0.00145957	28.7556
12:115996476|115997230//ENST00000281928	ENST00000394199	2588	15	54	7	hsa-miR-3944-3p,hsa-miR-4647,hsa-miR-6126,hsa-miR-6798-5p,hsa-miR-6805-5p,hsa-miR-766-5p,hsa-miR-8060	6.54869e-09	3.79292e-07	22.3654
3:65018441|65050822//XLOC.132426.12	ENST00000535489	2588	46	19	8	hsa-miR-1304-3p,hsa-miR-378a-5p,hsa-miR-4430,hsa-miR-619-5p,hsa-miR-640,hsa-miR-6765-3p,hsa-miR-6843-3p,hsa-miR-764	3.45495e-10	2.65382e-08	23.6888
2:164521980|164527135//ENST00000263915	ENST00000535489	2588	5	19	2	hsa-miR-4778-3p,hsa-miR-5096	0.000504132	0.00624037	54.4842
12:56664776|56673065//ENST00000537473	ENST00000535489	2588	26	19	7	hsa-miR-1224-3p,hsa-miR-1304-3p,hsa-miR-378a-5p,hsa-miR-504-3p,hsa-miR-5096,hsa-miR-619-5p,hsa-miR-6765-3p	2.00404e-10	1.61636e-08	36.6721
7:137912991|137916012//ENST00000330387	ENST00000313285	2588	17	28	4	hsa-miR-608,hsa-miR-6751-5p,hsa-miR-6783-3p,hsa-miR-6803-5p	2.37167e-05	0.000510684	21.7479
17:29648144|29650800//ENST00000269033	ENST00000313285	2588	18	28	4	hsa-miR-1236-3p,hsa-miR-3940-5p,hsa-miR-4507,hsa-miR-6880-5p	3.02663e-05	0.000627429	20.5397
2:128097429|128109746//ENST00000259253	ENST00000354284	2588	14	27	3	hsa-miR-1914-3p,hsa-miR-3135b,hsa-miR-3692-5p	0.000341692	0.00458744	20.5397
12:56664776|56673065//ENST00000537473	ENST00000354284	2588	26	27	7	hsa-miR-1224-3p,hsa-miR-1260a,hsa-miR-1260b,hsa-miR-1304-3p,hsa-miR-370-3p,hsa-miR-504-3p,hsa-miR-5096	3.35329e-09	2.07453e-07	25.8063
11:8435494|8464822//ENST00000315204	ENST00000354284	2588	13	27	3	hsa-miR-1184,hsa-miR-188-3p,hsa-miR-3692-5p	0.000270352	0.00380188	22.1197
1:20749723|20773610//ENST00000312239	ENST00000495186	2588	30	16	4	hsa-miR-1233-5p,hsa-miR-5088-3p,hsa-miR-6756-3p,hsa-miR-6778-5p	2.42743e-05	0.000520705	21.5667
3:65429520|65430881//ENST00000330909	ENST00000495186	2588	23	16	3	hsa-miR-3127-3p,hsa-miR-5088-3p,hsa-miR-6756-3p	0.000318661	0.00433753	21.0978
1:20765377|20776750//ENST00000312239	ENST00000495186	2588	28	16	4	hsa-miR-1233-5p,hsa-miR-5088-3p,hsa-miR-6756-3p,hsa-miR-6778-5p	1.8272e-05	0.000409763	23.1071
1:20749723|20773610//ENST00000419948	ENST00000495186	2588	28	16	4	hsa-miR-1233-5p,hsa-miR-5088-3p,hsa-miR-6756-3p,hsa-miR-6778-5p	1.8272e-05	0.000409763	23.1071
9:127344235|127345477//ENST00000373386	ENST00000495186	2588	7	16	2	hsa-miR-1271-3p,hsa-miR-6894-3p	0.000739301	0.00841095	46.2143
X:154789954|154792285//ENST00000369534	ENST00000256686	2588	16	28	4	hsa-miR-4722-5p,hsa-miR-612,hsa-miR-6860,hsa-miR-6864-5p	1.8272e-05	0.000409763	23.1071
19:10904951|10909207//ENST00000590039	ENST00000256686	2588	27	28	7	hsa-miR-3183,hsa-miR-3692-5p,hsa-miR-4723-3p,hsa-miR-5189-5p,hsa-miR-6071,hsa-miR-612,hsa-miR-6860	5.95397e-09	3.48004e-07	23.963
12:106842589|106851594//ENST00000355478	ENST00000256686	2588	11	28	3	hsa-miR-4723-3p,hsa-miR-612,hsa-miR-6860	0.000176731	0.00270163	25.2078
10:119838535|119842595//ENST00000360003	ENST00000256686	2588	9	28	3	hsa-miR-5189-5p,hsa-miR-612,hsa-miR-6860	9.12902e-05	0.00157409	30.8095
6:109475399|109476930//ENST00000230122	ENST00000256686	2588	13	28	3	hsa-miR-5189-5p,hsa-miR-612,hsa-miR-6860	0.000301913	0.00415332	21.3297
9:75932379|75986245//ENST00000376752	ENST00000256686	2588	6	28	3	hsa-miR-5189-5p,hsa-miR-612,hsa-miR-6860	2.22153e-05	0.0004836	46.2143
4:94573351|94586444//ENST00000437932	ENST00000256686	2588	11	28	3	hsa-miR-5189-5p,hsa-miR-612,hsa-miR-6860	0.000176731	0.00270163	25.2078
4:94573351|94586444//ENST00000318007	ENST00000256686	2588	10	28	3	hsa-miR-5189-5p,hsa-miR-612,hsa-miR-6860	0.00012947	0.00209478	27.7286
9:75932379|76027037//ENST00000376752	ENST00000256686	2588	11	28	6	hsa-miR-3183,hsa-miR-432-3p,hsa-miR-4723-3p,hsa-miR-5189-5p,hsa-miR-612,hsa-miR-6860	4.04414e-10	3.06049e-08	50.4156
19:10904951|10909207//ENST00000589693	ENST00000256686	2588	18	28	4	hsa-miR-3183,hsa-miR-3692-5p,hsa-miR-4723-3p,hsa-miR-6071	3.02663e-05	0.000627429	20.5397
4:128077788|128082305//ENST00000326639	ENST00000619676	2588	8	13	2	hsa-miR-212-5p,hsa-miR-4713-3p	0.000641392	0.00753621	49.7692
10:24937184|24942436//ENST00000320152	ENST00000619676	2588	6	13	2	hsa-miR-212-5p,hsa-miR-4435	0.000345559	0.0046293	66.359
14:93293858|93294937//ENST00000298896	ENST00000623213	2588	32	3	2	hsa-miR-3184-5p,hsa-miR-423-5p	0.000441063	0.00561496	53.9167
15:64817946|64819223//ENST00000268043	ENST00000623213	2588	35	3	2	hsa-miR-423-5p,hsa-miR-4688	0.000528685	0.00647963	49.2952
14:103662116|103670283//ENST00000445352	ENST00000623213	2588	35	3	2	hsa-miR-423-5p,hsa-miR-4688	0.000528685	0.00647963	49.2952
3:47056821|47067118//ENST00000445387	ENST00000623213	2588	42	3	2	hsa-miR-423-5p,hsa-miR-4688	0.000763646	0.00862872	41.0794
3:47056821|47067118//ENST00000330022	ENST00000623213	2588	40	3	2	hsa-miR-423-5p,hsa-miR-4688	0.000692165	0.00799913	43.1333
14:103662116|103670283//ENST00000246489	ENST00000623213	2588	35	3	2	hsa-miR-423-5p,hsa-miR-4688	0.000528685	0.00647963	49.2952
16:53469916|53470922//ENST00000262133	ENST00000623213	2588	35	3	2	hsa-miR-3184-5p,hsa-miR-423-5p	0.000528685	0.00647963	49.2952
14:93293858|93296157//ENST00000298896	ENST00000623213	2588	37	3	2	hsa-miR-3184-5p,hsa-miR-423-5p	0.000591464	0.00707689	46.6306
7:158901739|158906091//ENST00000407559	ENST00000370584	2588	7	30	3	hsa-miR-3064-5p,hsa-miR-518c-5p,hsa-miR-6504-5p	4.77198e-05	0.000919057	36.9714
21:34102835|34125480//ENST00000477091	ENST00000370584	2588	12	30	3	hsa-miR-3064-5p,hsa-miR-4512,hsa-miR-6504-5p	0.000288402	0.00400612	21.5667
15:85064370|85076787//ENST00000310298	ENST00000520188	2588	12	9	2	hsa-miR-216a-3p,hsa-miR-3681-3p	0.000697058	0.00803827	47.9259
22:41125864|41130003//ENST00000263253	ENST00000520188	2588	36	9	3	hsa-miR-216a-3p,hsa-miR-4725-3p,hsa-miR-6780b-5p	0.000196197	0.00293913	23.963
17:20253505|20306082//ENST00000581399	ENST00000520188	2588	22	9	3	hsa-miR-4725-3p,hsa-miR-5196-5p,hsa-miR-6780b-5p	4.33671e-05	0.00084841	39.2121
11:78465876|78493195//ENST00000281038	ENST00000520188	2588	8	9	2	hsa-miR-216a-3p,hsa-miR-3681-3p	0.000297867	0.00410959	71.8889
9:126381064|126395697//ENST00000361171	ENST00000520188	2588	35	9	3	hsa-miR-5196-5p,hsa-miR-6087,hsa-miR-6765-5p	0.000180163	0.00274359	24.6476
17:20253505|20306082//ENST00000261503	ENST00000520188	2588	33	9	3	hsa-miR-4725-3p,hsa-miR-5196-5p,hsa-miR-6780b-5p	0.000150713	0.00237244	26.1414
20:44511289|44514040//ENST00000255175	ENST00000431802	2588	16	5	2	hsa-miR-3160-3p,hsa-miR-765	0.000354601	0.00472155	64.7
8:30069642|30070059//ENST00000256255	ENST00000431802	2588	16	5	2	hsa-miR-4784,hsa-miR-765	0.000354601	0.00472155	64.7
6:16485972|16753347//ENST00000244769	ENST00000431802	2588	24	5	2	hsa-miR-4784,hsa-miR-765	0.000810534	0.00903982	43.1333
X:154789954|154792285//ENST00000369534	ENST00000447346	2588	16	17	3	hsa-miR-4763-3p,hsa-miR-6721-5p,hsa-miR-6836-5p	0.000125163	0.00203767	28.5441
19:10904951|10909207//ENST00000590699	ENST00000447346	2588	36	17	6	hsa-miR-4688,hsa-miR-4763-3p,hsa-miR-6721-5p,hsa-miR-6743-5p,hsa-miR-6808-5p,hsa-miR-6893-5p	5.20407e-08	2.43246e-06	25.3725
19:10904951|10909207//ENST00000590039	ENST00000447346	2588	27	17	4	hsa-miR-4688,hsa-miR-4763-3p,hsa-miR-6721-5p,hsa-miR-6743-5p	2.0411e-05	0.000449989	22.5534
9:77794463|77922345//ENST00000286548	ENST00000447346	2588	20	17	4	hsa-miR-4763-3p,hsa-miR-6808-5p,hsa-miR-6893-5p,hsa-miR-942-5p	5.79664e-06	0.00015361	30.4471
22:24302195|24313466//ENST00000314328	ENST00000447346	2588	17	17	4	hsa-miR-4688,hsa-miR-4763-3p,hsa-miR-6721-5p,hsa-miR-6743-5p	2.88221e-06	8.39553e-05	35.8201
6:17507169|17513954//ENST00000229922	ENST00000447346	2588	12	17	3	hsa-miR-4763-3p,hsa-miR-5008-5p,hsa-miR-6721-5p	4.99784e-05	0.000955537	38.0588
3:47840877|47843255//ENST00000348968	ENST00000447346	2588	45	17	7	hsa-miR-4763-3p,hsa-miR-4778-3p,hsa-miR-5088-3p,hsa-miR-6132,hsa-miR-6721-5p,hsa-miR-6836-5p,hsa-miR-6895-5p	5.0652e-09	3.00937e-07	23.681
9:96827080|96852005//ENST00000466833	ENST00000378406	2588	6	45	4	hsa-miR-3150a-3p,hsa-miR-6731-5p,hsa-miR-6763-5p,hsa-miR-8085	1.16823e-06	3.81654e-05	38.3407
9:96827080|96852005//ENST00000478850	ENST00000378406	2588	11	45	4	hsa-miR-3150a-3p,hsa-miR-6731-5p,hsa-miR-6763-5p,hsa-miR-8085	2.41122e-05	0.000517801	20.9131
X:32216916|32310276//ENST00000357033	ENST00000378406	2588	7	45	3	hsa-miR-412-3p,hsa-miR-6731-5p,hsa-miR-8085	0.000163882	0.00253959	24.6476
X:32287529|32310276//ENST00000357033	ENST00000378406	2588	7	45	3	hsa-miR-412-3p,hsa-miR-6731-5p,hsa-miR-8085	0.000163882	0.00253959	24.6476
6:158448996|158452268//ENST00000367094	ENST00000372723	2588	19	36	6	hsa-miR-1233-5p,hsa-miR-149-3p,hsa-miR-4728-5p,hsa-miR-6778-5p,hsa-miR-6825-5p,hsa-miR-6883-5p	1.11825e-07	4.81231e-06	22.7018
6:169762429|169769713//ENST00000366772	ENST00000372723	2588	10	36	3	hsa-miR-3155a,hsa-miR-3155b,hsa-miR-8069	0.000277603	0.00388406	21.5667
6:169762429|169769713//ENST00000588451	ENST00000372723	2588	10	36	3	hsa-miR-3155a,hsa-miR-3155b,hsa-miR-8069	0.000277603	0.00388406	21.5667
4:150588048|150599131//ENST00000507224	ENST00000627450	2588	15	3	2	hsa-miR-141-5p,hsa-miR-345-5p	9.37825e-05	0.00160889	115.022
4:150588048|150599131//ENST00000357115	ENST00000627450	2588	15	3	2	hsa-miR-141-5p,hsa-miR-345-5p	9.37825e-05	0.00160889	115.022
5:95763508|95788858//ENST00000379982	ENST00000422242	2588	29	16	5	hsa-miR-1587,hsa-miR-3620-5p,hsa-miR-4265,hsa-miR-4322,hsa-miR-6861-5p	4.94106e-07	1.79377e-05	27.8879
13:40940921|40941370//ENST00000239882	ENST00000422242	2588	24	16	3	hsa-miR-1587,hsa-miR-3620-5p,hsa-miR-6861-5p	0.000362809	0.00480938	20.2188
5:95763508|95783963//ENST00000379982	ENST00000422242	2588	27	16	5	hsa-miR-1587,hsa-miR-3620-5p,hsa-miR-4265,hsa-miR-4322,hsa-miR-6861-5p	3.38304e-07	1.2846e-05	29.9537
19:12679457|12680325//ENST00000595912	ENST00000422242	2588	23	16	3	hsa-miR-4296,hsa-miR-4322,hsa-miR-6773-5p	0.000318661	0.00433753	21.0978
2:100006632|100008932//ENST00000317233	ENST00000382828	2588	44	3	2	hsa-miR-143-5p,hsa-miR-4539	0.000838598	0.0092768	39.2121
1:219179147|219211752//ENST00000474379	ENST00000340811	2588	10	34	3	hsa-miR-30b-3p,hsa-miR-6779-5p,hsa-miR-6780a-5p	0.000233611	0.00338033	22.8353
1:219179147|219211752//ENST00000477938	ENST00000340811	2588	10	34	3	hsa-miR-30b-3p,hsa-miR-6779-5p,hsa-miR-6780a-5p	0.000233611	0.00338033	22.8353
10:110100625|110112915//ENST00000497125	ENST00000340811	2588	9	34	4	hsa-miR-30b-3p,hsa-miR-6779-5p,hsa-miR-6780a-5p,hsa-miR-7106-5p	2.99065e-06	8.66822e-05	33.8301
10:110100625|110112915//ENST00000277900	ENST00000340811	2588	10	34	4	hsa-miR-30b-3p,hsa-miR-6779-5p,hsa-miR-6780a-5p,hsa-miR-7106-5p	4.93814e-06	0.000133776	30.4471
1:219179147|219211752//ENST00000460522	ENST00000340811	2588	10	34	3	hsa-miR-30b-3p,hsa-miR-6779-5p,hsa-miR-6780a-5p	0.000233611	0.00338033	22.8353
10:91425281|91462184//ENST00000298068	ENST00000340811	2588	11	34	3	hsa-miR-1587,hsa-miR-3620-5p,hsa-miR-4498	0.000318332	0.00433471	20.7594
4:109659011|109664394//ENST00000394650	ENST00000557912	2588	5	15	2	hsa-miR-6815-5p,hsa-miR-6865-5p	0.000310517	0.00424925	69.0133
6:136147351|136155758//ENST00000308191	ENST00000557912	2588	19	15	4	hsa-miR-4701-3p,hsa-miR-6736-5p,hsa-miR-6815-5p,hsa-miR-6865-5p	2.69542e-06	7.91755e-05	36.3228
8:17989859|17993619//ENST00000519253	ENST00000303436	2588	9	10	2	hsa-miR-634,hsa-miR-8077	0.000476988	0.00597324	57.5111
8:17989859|17993619//ENST00000325083	ENST00000303436	2588	10	10	2	hsa-miR-634,hsa-miR-8077	0.000595005	0.00710843	51.76
17:62552302|62565137//ENST00000326270	ENST00000370723	2588	14	7	2	hsa-miR-6726-5p,hsa-miR-920	0.000562087	0.0067979	52.8163
20:58246267|58247321//ENST00000495058	ENST00000370723	2588	51	7	3	hsa-miR-589-5p,hsa-miR-6127,hsa-miR-6133	0.000238823	0.00344067	21.7479
22:32237244|32254213//ENST00000266086	ENST00000370723	2588	31	7	3	hsa-miR-6127,hsa-miR-6129,hsa-miR-6133	5.27709e-05	0.000999549	35.7788
1:35470863|35479212//ENST00000325722	ENST00000370723	2588	16	7	2	hsa-miR-6127,hsa-miR-6133	0.000739301	0.00841095	46.2143
1:35470863|35479212//ENST00000431916	ENST00000370723	2588	13	7	2	hsa-miR-6127,hsa-miR-6133	0.000482411	0.00602409	56.8791
11:12764179|12902113//ENST00000527636	ENST00000370723	2588	55	7	4	hsa-miR-6127,hsa-miR-6129,hsa-miR-6726-5p,hsa-miR-920	6.10275e-06	0.000160531	26.8883
4:109530289|109531522//ENST00000265175	ENST00000370723	2588	12	7	3	hsa-miR-6127,hsa-miR-6129,hsa-miR-6726-5p	2.64064e-06	7.78269e-05	92.4286
17:16098367|16101805//ENST00000395848	ENST00000370723	2588	39	7	3	hsa-miR-6127,hsa-miR-6129,hsa-miR-6133	0.000106292	0.00178314	28.4396
4:3186597|3189093//ENST00000355072	ENST00000370723	2588	17	7	2	hsa-miR-6127,hsa-miR-6133	0.000836792	0.00926133	43.4958
7:137912991|137916012//ENST00000330387	ENST00000299529	2588	17	16	3	hsa-miR-608,hsa-miR-6751-5p,hsa-miR-6803-5p	0.000125163	0.00203767	28.5441
1:70417937|70424416//ENST00000370938	ENST00000299529	2588	7	16	2	hsa-miR-6756-5p,hsa-miR-92a-2-5p	0.000739301	0.00841095	46.2143
8:30680904|30700135//ENST00000546342	ENST00000299529	2588	29	16	4	hsa-miR-4651,hsa-miR-608,hsa-miR-6752-5p,hsa-miR-7110-5p	2.11165e-05	0.000463094	22.3103
12:78049993|78059115//ENST00000397909	ENST00000299529	2588	28	16	4	hsa-miR-4651,hsa-miR-6751-5p,hsa-miR-6756-5p,hsa-miR-6803-5p	1.8272e-05	0.000409763	23.1071
8:30680904|30700135//ENST00000541648	ENST00000299529	2588	29	16	4	hsa-miR-4651,hsa-miR-608,hsa-miR-6752-5p,hsa-miR-7110-5p	2.11165e-05	0.000463094	22.3103
8:30680904|30700135//ENST00000537535	ENST00000299529	2588	23	16	4	hsa-miR-4651,hsa-miR-608,hsa-miR-6752-5p,hsa-miR-7110-5p	8.05123e-06	0.000203645	28.1304
5:168683966|168685927//ENST00000518092	ENST00000299529	2588	23	16	4	hsa-miR-4472,hsa-miR-6752-5p,hsa-miR-7110-5p,hsa-miR-92a-2-5p	8.05123e-06	0.000203645	28.1304
5:168683966|168685927//ENST00000332966	ENST00000299529	2588	29	16	4	hsa-miR-4472,hsa-miR-6752-5p,hsa-miR-7110-5p,hsa-miR-92a-2-5p	2.11165e-05	0.000463094	22.3103
2:48328561|48346751//ENST00000340553	ENST00000551156	2588	19	17	3	hsa-miR-211-3p,hsa-miR-6793-5p,hsa-miR-7845-5p	0.000213946	0.00314991	24.0372
8:100062591|100080355//ENST00000523437	ENST00000551156	2588	21	17	5	hsa-miR-4722-5p,hsa-miR-6134,hsa-miR-6754-5p,hsa-miR-6851-5p,hsa-miR-7150	1.22782e-07	5.22904e-06	36.2465
7:6814764|6824737//ENST00000411858	ENST00000551156	2588	8	17	4	hsa-miR-4739,hsa-miR-6134,hsa-miR-6799-5p,hsa-miR-6851-5p	8.79081e-08	3.88166e-06	76.1176
1:237364358|237388183//ENST00000366574	ENST00000551156	2588	26	17	4	hsa-miR-6134,hsa-miR-6799-5p,hsa-miR-6851-5p,hsa-miR-7845-5p	1.74576e-05	0.000394009	23.4208
8:100062591|100080355//ENST00000360863	ENST00000551156	2588	21	17	5	hsa-miR-4722-5p,hsa-miR-6134,hsa-miR-6754-5p,hsa-miR-6851-5p,hsa-miR-7150	1.22782e-07	5.22904e-06	36.2465
7:6814764|6824737//ENST00000626257	ENST00000551156	2588	11	17	4	hsa-miR-4739,hsa-miR-6134,hsa-miR-6799-5p,hsa-miR-6851-5p	4.09436e-07	1.51944e-05	55.3583
7:6814764|6824737//ENST00000316731	ENST00000551156	2588	11	17	4	hsa-miR-4739,hsa-miR-6134,hsa-miR-6799-5p,hsa-miR-6851-5p	4.09436e-07	1.51944e-05	55.3583
9:137728349|137744090//ENST00000637261	ENST00000238855	2588	32	11	3	hsa-miR-2278,hsa-miR-5196-5p,hsa-miR-6757-5p	0.000265093	0.00374343	22.0568
1:64629355|64634260//ENST00000495994	ENST00000367928	2588	8	44	3	hsa-miR-296-3p,hsa-miR-3652,hsa-miR-6823-5p	0.000242108	0.00347828	22.0568
10:13291831|13295606//ENST00000263038	ENST00000367928	2588	8	44	3	hsa-miR-3175,hsa-miR-5011-3p,hsa-miR-6823-5p	0.000242108	0.00347828	22.0568
4:109530289|109531522//ENST00000265175	ENST00000337579	2588	12	3	2	hsa-miR-4496,hsa-miR-6720-5p	5.89948e-05	0.00109686	143.778
12:72618891|72621751//ENST00000261180	ENST00000389420	2588	10	9	2	hsa-miR-520a-5p,hsa-miR-525-5p	0.000476988	0.00597324	57.5111
5:38510464|38530666//ENST00000263409	ENST00000389420	2588	12	9	2	hsa-miR-520a-5p,hsa-miR-525-5p	0.000697058	0.00803827	47.9259
19:20792512|20793878//ENST00000344519	ENST00000389420	2588	4	9	2	hsa-miR-520a-5p,hsa-miR-525-5p	6.42916e-05	0.0011777	143.778
12:96323948|96334865//ENST00000261211	ENST00000389420	2588	11	9	2	hsa-miR-141-3p,hsa-miR-200a-3p	0.000581933	0.00698748	52.2828
7:137912991|137916012//ENST00000616381	ENST00000389420	2588	11	9	2	hsa-miR-520a-5p,hsa-miR-525-5p	0.000581933	0.00698748	52.2828
5:38527155|38530666//ENST00000263409	ENST00000389420	2588	3	9	2	hsa-miR-520a-5p,hsa-miR-525-5p	3.22039e-05	0.000660867	191.704
2:144424796|144430026//ENST00000636732	ENST00000389420	2588	13	9	2	hsa-miR-520a-5p,hsa-miR-525-5p	0.000822309	0.00913863	44.2393
1:25448808|25456831//ENST00000374343	ENST00000389420	2588	11	9	2	hsa-miR-525-5p,hsa-miR-6760-5p	0.000581933	0.00698748	52.2828
2:144424796|144430026//ENST00000392861	ENST00000389420	2588	11	9	2	hsa-miR-520a-5p,hsa-miR-525-5p	0.000581933	0.00698748	52.2828
2:144424796|144430026//ENST00000303660	ENST00000389420	2588	11	9	2	hsa-miR-520a-5p,hsa-miR-525-5p	0.000581933	0.00698748	52.2828
12:56664776|56673065//ENST00000537473	ENST00000400217	2588	26	4	2	hsa-miR-1224-3p,hsa-miR-5096	0.000575327	0.00692807	49.7692
3:49335020|49335596//ENST00000265560	ENST00000240335	2588	10	33	3	hsa-miR-1972,hsa-miR-4717-5p,hsa-miR-6800-3p	0.000213434	0.0031446	23.5273
1:11068008|11076948//ENST00000376936	ENST00000261007	2588	19	18	3	hsa-miR-6735-5p,hsa-miR-7843-5p,hsa-miR-942-5p	0.000255544	0.003634	22.7018
6:42650284|42652645//ENST00000372899	ENST00000261007	2588	11	18	4	hsa-miR-4632-5p,hsa-miR-6735-5p,hsa-miR-6879-5p,hsa-miR-942-5p	5.25274e-07	1.89349e-05	52.2828
17:82563354|82571870//ENST00000527313	ENST00000261007	2588	34	18	5	hsa-miR-1976,hsa-miR-4632-5p,hsa-miR-6735-5p,hsa-miR-6879-5p,hsa-miR-7843-5p	2.18914e-06	6.61176e-05	21.1438
1:11068008|11076948//ENST00000474216	ENST00000261007	2588	20	18	3	hsa-miR-6735-5p,hsa-miR-7843-5p,hsa-miR-942-5p	0.000299331	0.00412563	21.5667
1:43920404|43920928//ENST00000262915	ENST00000261007	2588	21	18	4	hsa-miR-3180-5p,hsa-miR-4632-5p,hsa-miR-6879-5p,hsa-miR-7843-5p	9.12097e-06	0.000226453	27.3862
10:69198372|69203043//ENST00000359655	ENST00000261007	2588	20	18	3	hsa-miR-4270,hsa-miR-6754-5p,hsa-miR-6760-5p	0.000299331	0.00412563	21.5667
1:74249459|74336149//ENST00000326637	ENST00000261007	2588	12	18	3	hsa-miR-3617-3p,hsa-miR-4632-5p,hsa-miR-6735-5p	5.98172e-05	0.00110955	35.9444
11:125602303|125604247//ENST00000392708	ENST00000534871	2588	23	7	3	hsa-miR-3173-3p,hsa-miR-6891-5p,hsa-miR-765	2.09865e-05	0.00046072	48.2236
10:26759062|26770345//ENST00000346832	ENST00000534871	2588	37	7	3	hsa-miR-3173-3p,hsa-miR-6891-5p,hsa-miR-765	9.05813e-05	0.00156418	29.9768
17:63193991|63200957//ENST00000389520	ENST00000589160	2588	34	14	4	hsa-miR-1233-5p,hsa-miR-6756-5p,hsa-miR-6766-5p,hsa-miR-6778-5p	2.26765e-05	0.000491943	21.7479
8:38429682|38429948//ENST00000335922	ENST00000589160	2588	25	14	3	hsa-miR-4651,hsa-miR-4776-5p,hsa-miR-608	0.000270408	0.0038023	22.1829
3:170454290|170454913//ENST00000488989	ENST00000589160	2588	32	14	4	hsa-miR-4651,hsa-miR-5194,hsa-miR-608,hsa-miR-6756-5p	1.76934e-05	0.000398471	23.1071
12:116096669|116111512//ENST00000281928	ENST00000253778	2588	2	56	2	hsa-miR-2278,hsa-miR-4709-3p	0.000460034	0.0058062	46.2143
1:11068008|11076948//ENST00000376936	ENST00000395915	2588	19	30	6	hsa-miR-1226-5p,hsa-miR-370-3p,hsa-miR-4436b-3p,hsa-miR-6735-5p,hsa-miR-760,hsa-miR-7843-5p	3.49914e-08	1.70695e-06	27.2421
6:42650284|42652645//ENST00000372899	ENST00000395915	2588	11	30	3	hsa-miR-4632-5p,hsa-miR-6735-5p,hsa-miR-6879-5p	0.000218006	0.00319787	23.5273
1:11068008|11076948//ENST00000474216	ENST00000395915	2588	20	30	6	hsa-miR-1226-5p,hsa-miR-370-3p,hsa-miR-4436b-3p,hsa-miR-6735-5p,hsa-miR-760,hsa-miR-7843-5p	4.95886e-08	2.33055e-06	25.88
15:22541995|22543138//ENST00000613386	ENST00000544280	2588	35	10	3	hsa-miR-6795-5p,hsa-miR-6887-5p,hsa-miR-7158-5p	0.00025499	0.00362802	22.1829
10:24937184|24942436//ENST00000320152	ENST00000544280	2588	6	10	2	hsa-miR-4435,hsa-miR-7158-5p	0.00019998	0.00298348	86.2667
11:66519617|66523882//ENST00000318312	ENST00000544280	2588	38	10	3	hsa-miR-3190-5p,hsa-miR-3911,hsa-miR-4435	0.000326653	0.00442537	20.4316
1:204116507|204117707//ENST00000272193	ENST00000544280	2588	32	10	3	hsa-miR-3138,hsa-miR-6795-5p,hsa-miR-6887-5p	0.000194428	0.00291828	24.2625
5:138006990|138019146//ENST00000033079	ENST00000397505	2588	20	3	2	hsa-miR-3202,hsa-miR-6876-5p	0.000169482	0.00261072	86.2667
5:157518823|157537991//ENST00000257527	ENST00000397505	2588	19	3	2	hsa-miR-4739,hsa-miR-6876-5p	0.000152574	0.00239659	90.807
3:65429520|65453340//ENST00000330909	ENST00000443022	2588	40	3	2	hsa-miR-6826-3p,hsa-miR-6887-3p	0.000692165	0.00799913	43.1333
4:151127618|151135132//ENST00000304527	ENST00000443022	2588	29	3	2	hsa-miR-6826-3p,hsa-miR-6887-3p	0.000361313	0.00479359	59.4943
3:65429520|65430881//ENST00000330909	ENST00000443022	2588	23	3	2	hsa-miR-6826-3p,hsa-miR-6887-3p	0.000225504	0.00328556	75.0145
1:32279671|32280210//ENST00000469765	ENST00000443022	2588	30	3	2	hsa-miR-6887-3p,hsa-miR-761	0.00038702	0.00505893	57.5111
3:136443287|136477412//ENST00000236698	ENST00000443022	2588	10	3	2	hsa-miR-6826-3p,hsa-miR-6887-3p	4.02445e-05	0.000796999	172.533
4:53425872|53444103//ENST00000306932	ENST00000489459	2588	25	18	4	hsa-miR-1249-5p,hsa-miR-6779-5p,hsa-miR-6780a-5p,hsa-miR-6797-5p	1.89453e-05	0.000422471	23.0044
6:158448996|158452268//ENST00000367094	ENST00000489459	2588	19	18	3	hsa-miR-149-3p,hsa-miR-4728-5p,hsa-miR-6785-5p	0.000255544	0.003634	22.7018
8:47407861|47440542//ENST00000297423	ENST00000489459	2588	22	18	6	hsa-miR-1249-5p,hsa-miR-149-3p,hsa-miR-4728-5p,hsa-miR-6779-5p,hsa-miR-6780a-5p,hsa-miR-6797-5p	3.13157e-09	1.9504e-07	39.2121
3:4410865|4420146//ENST00000272902	ENST00000489459	2588	26	18	6	hsa-miR-1249-5p,hsa-miR-149-3p,hsa-miR-4728-5p,hsa-miR-6780a-5p,hsa-miR-6785-5p,hsa-miR-6797-5p	9.50921e-09	5.31385e-07	33.1795
4:53425872|53444103//ENST00000358575	ENST00000489459	2588	26	18	4	hsa-miR-1249-5p,hsa-miR-6779-5p,hsa-miR-6780a-5p,hsa-miR-6797-5p	2.22926e-05	0.000484944	22.1197
2:160313156|160367391//ENST00000348849	ENST00000489459	2588	37	18	6	hsa-miR-149-3p,hsa-miR-608,hsa-miR-6779-5p,hsa-miR-6785-5p,hsa-miR-6812-5p,hsa-miR-6819-5p	9.18701e-08	4.03711e-06	23.3153
11:9989497|10002689//ENST00000256190	ENST00000489459	2588	37	18	8	hsa-miR-1249-5p,hsa-miR-149-3p,hsa-miR-4728-5p,hsa-miR-6779-5p,hsa-miR-6780a-5p,hsa-miR-6785-5p,hsa-miR-6797-5p,hsa-miR-8059	3.0945e-11	2.94405e-09	31.0871
8:21974670|21980203//ENST00000252512	ENST00000403663	2588	13	23	3	hsa-miR-1249-5p,hsa-miR-6797-5p,hsa-miR-6891-5p	0.000165608	0.00256121	25.9666
19:8468774|8474244//ENST00000600092	ENST00000403663	2588	12	23	3	hsa-miR-1249-5p,hsa-miR-4459,hsa-miR-6797-5p	0.000128134	0.00207726	28.1304
12:91151654|91158509//ENST00000052754	ENST00000403663	2588	19	23	4	hsa-miR-4533,hsa-miR-4747-5p,hsa-miR-5196-5p,hsa-miR-6891-5p	1.68454e-05	0.000382343	23.6888
19:8468774|8474244//ENST00000325495	ENST00000403663	2588	13	23	3	hsa-miR-1249-5p,hsa-miR-4459,hsa-miR-6797-5p	0.000165608	0.00256121	25.9666
19:40623604|40624082//ENST00000204005	ENST00000426650	2588	23	14	3	hsa-miR-1228-3p,hsa-miR-1296-3p,hsa-miR-3663-5p	0.000209552	0.00309826	24.1118
10:13291831|13295606//ENST00000263038	ENST00000426650	2588	8	14	2	hsa-miR-6777-5p,hsa-miR-6889-5p	0.000747132	0.00847956	46.2143
6:160397979|160410846//ENST00000275300	ENST00000426650	2588	33	14	5	hsa-miR-3173-3p,hsa-miR-320a,hsa-miR-320b,hsa-miR-6777-5p,hsa-miR-6889-5p	4.54347e-07	1.66575e-05	28.0087
3:100732508|100736716//ENST00000240851	ENST00000343139	2588	14	23	3	hsa-miR-6769a-5p,hsa-miR-6769b-5p,hsa-miR-765	0.000209552	0.00309826	24.1118
19:10637644|10638315//ENST00000591194	ENST00000343139	2588	16	23	4	hsa-miR-6748-5p,hsa-miR-6769a-5p,hsa-miR-6769b-5p,hsa-miR-6782-5p	8.05123e-06	0.000203645	28.1304
17:50736960|50741731//ENST00000240304	ENST00000343139	2588	5	23	2	hsa-miR-4640-5p,hsa-miR-4726-5p	0.000743567	0.00844785	45.0087
17:42345559|42348517//ENST00000264657	ENST00000343139	2588	15	23	3	hsa-miR-4640-5p,hsa-miR-4726-5p,hsa-miR-8082	0.000260421	0.00368901	22.5043
19:10637644|10638315//ENST00000335757	ENST00000343139	2588	18	23	4	hsa-miR-6748-5p,hsa-miR-6769a-5p,hsa-miR-6769b-5p,hsa-miR-6782-5p	1.33778e-05	0.000314279	25.0048
6:73466209|73466606//ENST00000370300	ENST00000328092	2588	11	6	2	hsa-miR-199a-5p,hsa-miR-199b-5p	0.000244168	0.00350153	78.4242
3:113488945|113499582//ENST00000295872	ENST00000328092	2588	6	6	2	hsa-miR-199a-5p,hsa-miR-199b-5p	6.69359e-05	0.00121741	143.778
19:12145258|12146224//ENST00000434822	ENST00000328092	2588	20	6	2	hsa-miR-199a-5p,hsa-miR-199b-5p	0.000835676	0.00925566	43.1333
10:125995417|126008550//ENST00000368693	ENST00000328092	2588	28	6	3	hsa-miR-199a-5p,hsa-miR-199b-5p,hsa-miR-2276-5p	2.22153e-05	0.0004836	46.2143
10:125995417|126008550//ENST00000368691	ENST00000328092	2588	28	6	3	hsa-miR-199a-5p,hsa-miR-199b-5p,hsa-miR-2276-5p	2.22153e-05	0.0004836	46.2143
22:41125864|41130003//ENST00000263253	ENST00000524226	2588	36	3	2	hsa-miR-216a-3p,hsa-miR-4716-3p	0.000559639	0.00677542	47.9259
4:113500463|113548729//ENST00000508738	ENST00000578122	2588	21	5	2	hsa-miR-6512-3p,hsa-miR-6720-5p	0.000618149	0.00732321	49.2952
4:113500463|113548729//ENST00000394522	ENST00000578122	2588	21	5	2	hsa-miR-6512-3p,hsa-miR-6720-5p	0.000618149	0.00732321	49.2952
4:113500463|113548729//ENST00000514328	ENST00000578122	2588	21	5	2	hsa-miR-6512-3p,hsa-miR-6720-5p	0.000618149	0.00732321	49.2952
4:113500463|113548729//ENST00000296402	ENST00000578122	2588	21	5	2	hsa-miR-6512-3p,hsa-miR-6720-5p	0.000618149	0.00732321	49.2952
1:202750659|202758510//ENST00000235790	ENST00000578122	2588	22	5	2	hsa-miR-6512-3p,hsa-miR-6720-5p	0.000679436	0.00788438	47.0545
20:32366384|32369123//ENST00000375687	ENST00000382082	2588	9	5	2	hsa-miR-449c-5p,hsa-miR-616-3p	0.000106959	0.00179235	115.022
20:32366384|32369123//ENST00000542461	ENST00000382082	2588	12	5	2	hsa-miR-449c-5p,hsa-miR-616-3p	0.000195637	0.00293254	86.2667
20:32366384|32369123//ENST00000306058	ENST00000382082	2588	10	5	2	hsa-miR-449c-5p,hsa-miR-616-3p	0.000133596	0.00214995	103.52
11:120476661|120477526//ENST00000356641	ENST00000439706	2588	13	32	4	hsa-miR-378a-3p,hsa-miR-378c,hsa-miR-378d,hsa-miR-378e	1.27486e-05	0.000301584	24.8846
10:45728862|45740246//ENST00000336378	ENST00000439706	2588	18	32	5	hsa-miR-378a-3p,hsa-miR-378c,hsa-miR-378d,hsa-miR-378e,hsa-miR-378i	1.59775e-06	5.02295e-05	22.4653
10:50069547|50080931//ENST00000282633	ENST00000439706	2588	18	32	5	hsa-miR-378a-3p,hsa-miR-378c,hsa-miR-378d,hsa-miR-378e,hsa-miR-378i	1.59775e-06	5.02295e-05	22.4653
14:31380467|31383771//ENST00000538864	ENST00000409368	2588	8	13	2	hsa-miR-3146,hsa-miR-4786-3p	0.000641392	0.00753621	49.7692
1:219179147|219211752//ENST00000366928	ENST00000619636	2588	12	42	4	hsa-miR-30b-3p,hsa-miR-3187-5p,hsa-miR-6779-5p,hsa-miR-6860	2.70285e-05	0.000570239	20.5397
7:140702866|140704963//ENST00000247866	ENST00000619636	2588	7	42	5	hsa-miR-204-3p,hsa-miR-4283,hsa-miR-4437,hsa-miR-4646-5p,hsa-miR-6784-5p	1.80962e-08	9.47017e-07	44.0136
10:119838535|119842595//ENST00000360003	ENST00000619636	2588	9	42	4	hsa-miR-3154,hsa-miR-3187-5p,hsa-miR-612,hsa-miR-6860	7.12836e-06	0.000183511	27.3862
5:154865192|154872651//ENST00000518775	ENST00000619636	2588	7	42	3	hsa-miR-298,hsa-miR-3174,hsa-miR-6882-3p	0.000133051	0.00214254	26.4082
6:83934595|83936376//ENST00000369681	ENST00000619636	2588	3	42	2	hsa-miR-103a-3p,hsa-miR-107	0.000763646	0.00862872	41.0794
1:219179147|219211752//ENST00000463964	ENST00000619636	2588	12	42	4	hsa-miR-30b-3p,hsa-miR-3187-5p,hsa-miR-6779-5p,hsa-miR-6860	2.70285e-05	0.000570239	20.5397
16:3504720|3512478//ENST00000574369	ENST00000619636	2588	10	42	4	hsa-miR-3187-5p,hsa-miR-6851-5p,hsa-miR-6860,hsa-miR-6882-3p	1.17409e-05	0.000281152	24.6476
1:219179147|219211752//ENST00000366927	ENST00000619636	2588	12	42	4	hsa-miR-30b-3p,hsa-miR-3187-5p,hsa-miR-6779-5p,hsa-miR-6860	2.70285e-05	0.000570239	20.5397
X:37386599|37426000//ENST00000449135	ENST00000484980	2588	6	62	3	hsa-miR-5572,hsa-miR-6825-5p,hsa-miR-6855-5p	0.000248907	0.00355685	20.871
9:137564434|137565154//ENST00000479650	ENST00000543163	2588	32	36	9	hsa-miR-138-5p,hsa-miR-149-3p,hsa-miR-4322,hsa-miR-4446-3p,hsa-miR-4721,hsa-miR-5001-5p,hsa-miR-6785-5p,hsa-miR-6883-5p,hsa-miR-762	1.4997e-10	1.24164e-08	20.2188
10:12117673|12120267//ENST00000263035	ENST00000354185	2588	8	40	3	hsa-miR-4747-5p,hsa-miR-5196-5p,hsa-miR-6743-5p	0.000181673	0.00276224	24.2625
6:22173998|22191656//ENST00000606197	ENST00000588114	2588	5	20	2	hsa-miR-4763-5p,hsa-miR-596	0.000559712	0.00677542	51.76
10:86467279|86473973//ENST00000263070	ENST00000588114	2588	22	20	4	hsa-miR-4436b-3p,hsa-miR-4632-5p,hsa-miR-6735-5p,hsa-miR-6879-5p	1.73785e-05	0.000392482	23.5273
1:11068008|11076948//ENST00000376936	ENST00000588114	2588	19	20	3	hsa-miR-4436b-3p,hsa-miR-6735-5p,hsa-miR-7843-5p	0.000353703	0.00471303	20.4316
6:42650284|42652645//ENST00000372899	ENST00000588114	2588	11	20	4	hsa-miR-4632-5p,hsa-miR-650,hsa-miR-6735-5p,hsa-miR-6879-5p	8.28071e-07	2.82617e-05	47.0545
1:43920404|43920928//ENST00000262915	ENST00000588114	2588	21	20	4	hsa-miR-4436b-3p,hsa-miR-4632-5p,hsa-miR-6879-5p,hsa-miR-7843-5p	1.42897e-05	0.000332388	24.6476
5:74813840|74841679//ENST00000510609	ENST00000409640	2588	11	28	5	hsa-miR-106a-5p,hsa-miR-106b-5p,hsa-miR-17-5p,hsa-miR-20a-5p,hsa-miR-20b-5p	4.50539e-08	2.13918e-06	42.013
5:108946130|108959347//ENST00000281092	ENST00000409640	2588	19	28	6	hsa-miR-106a-5p,hsa-miR-106b-5p,hsa-miR-17-5p,hsa-miR-20a-5p,hsa-miR-20b-5p,hsa-miR-93-5p	2.23954e-08	1.14596e-06	29.188
5:74834426|74841679//ENST00000389156	ENST00000409640	2588	12	28	5	hsa-miR-106a-5p,hsa-miR-106b-5p,hsa-miR-17-5p,hsa-miR-20a-5p,hsa-miR-20b-5p	7.66618e-08	3.4372e-06	38.5119
5:74813840|74841679//ENST00000389156	ENST00000409640	2588	14	28	5	hsa-miR-106a-5p,hsa-miR-106b-5p,hsa-miR-17-5p,hsa-miR-20a-5p,hsa-miR-20b-5p	1.90916e-07	7.73592e-06	33.0102
3:65018441|65050822//XLOC.132426.12	ENST00000409640	2588	46	28	12	hsa-miR-106a-5p,hsa-miR-106b-5p,hsa-miR-1304-3p,hsa-miR-17-5p,hsa-miR-20a-5p,hsa-miR-20b-5p,hsa-miR-372-3p,hsa-miR-378a-5p,hsa-miR-4430,hsa-miR-4772-3p,hsa-miR-619-5p,hsa-miR-93-5p	5.29354e-15	1.0249e-12	24.1118
7:130170400|130181719//ENST00000473456	ENST00000409640	2588	18	28	4	hsa-miR-17-5p,hsa-miR-20b-5p,hsa-miR-378a-5p,hsa-miR-93-5p	3.02663e-05	0.000627429	20.5397
12:19462510|19473355//ENST00000266508	ENST00000409640	2588	4	28	2	hsa-miR-3135b,hsa-miR-6514-5p	0.000668455	0.00778018	46.2143
12:56664776|56673065//ENST00000537473	ENST00000409640	2588	26	28	7	hsa-miR-1273f,hsa-miR-1304-3p,hsa-miR-378a-5p,hsa-miR-4772-3p,hsa-miR-504-3p,hsa-miR-5096,hsa-miR-619-5p	4.44211e-09	2.67442e-07	24.8846
11:18564892|18578808//ENST00000300038	ENST00000409206	2588	11	46	5	hsa-miR-4716-3p,hsa-miR-4723-5p,hsa-miR-6794-5p,hsa-miR-7111-5p,hsa-miR-939-5p	6.06663e-07	2.14967e-05	25.5731
11:18564892|18578808//ENST00000320750	ENST00000409206	2588	9	46	5	hsa-miR-4716-3p,hsa-miR-4723-5p,hsa-miR-6794-5p,hsa-miR-7111-5p,hsa-miR-939-5p	1.69918e-07	6.97838e-06	31.256
2:205440370|205440672//ENST00000351153	ENST00000409206	2588	12	46	5	hsa-miR-4716-3p,hsa-miR-4723-5p,hsa-miR-6794-5p,hsa-miR-6870-5p,hsa-miR-7111-5p	1.02624e-06	3.41039e-05	23.442
1:219179147|219211752//ENST00000366928	ENST00000341298	2588	12	10	2	hsa-miR-6779-5p,hsa-miR-6780a-5p	0.000869077	0.00953846	43.1333
4:53425872|53444103//ENST00000306932	ENST00000341298	2588	25	10	3	hsa-miR-6779-5p,hsa-miR-6780a-5p,hsa-miR-766-5p	9.14558e-05	0.00157645	31.056
16:15776078|15786732//ENST00000300036	ENST00000341298	2588	11	10	2	hsa-miR-1273h-5p,hsa-miR-7106-5p	0.000725728	0.00829611	47.0545
1:219179147|219211752//ENST00000474379	ENST00000341298	2588	10	10	2	hsa-miR-6779-5p,hsa-miR-6780a-5p	0.000595005	0.00710843	51.76
1:219179147|219211752//ENST00000477938	ENST00000341298	2588	10	10	2	hsa-miR-6779-5p,hsa-miR-6780a-5p	0.000595005	0.00710843	51.76
10:110100625|110112915//ENST00000497125	ENST00000341298	2588	9	10	3	hsa-miR-6779-5p,hsa-miR-6780a-5p,hsa-miR-7106-5p	3.45082e-06	9.81505e-05	86.2667
1:219179147|219211752//ENST00000463964	ENST00000341298	2588	12	10	2	hsa-miR-6779-5p,hsa-miR-6780a-5p	0.000869077	0.00953846	43.1333
10:110100625|110112915//ENST00000277900	ENST00000341298	2588	10	10	3	hsa-miR-6779-5p,hsa-miR-6780a-5p,hsa-miR-7106-5p	4.91972e-06	0.000133353	77.64
X:17687742|17692468//ENST00000380060	ENST00000341298	2588	36	10	4	hsa-miR-1273h-5p,hsa-miR-6780a-5p,hsa-miR-7106-5p,hsa-miR-766-5p	6.24877e-06	0.000163907	28.7556
4:53425872|53444103//ENST00000358575	ENST00000341298	2588	26	10	3	hsa-miR-6779-5p,hsa-miR-6780a-5p,hsa-miR-766-5p	0.000103174	0.00173954	29.8615
1:219179147|219211752//ENST00000460522	ENST00000341298	2588	10	10	2	hsa-miR-6779-5p,hsa-miR-6780a-5p	0.000595005	0.00710843	51.76
2:160313156|160367391//ENST00000348849	ENST00000341298	2588	37	10	3	hsa-miR-4446-3p,hsa-miR-4741,hsa-miR-6779-5p	0.00030148	0.00414905	20.9838
10:7197548|7285954//ENST00000361972	ENST00000341298	2588	46	10	4	hsa-miR-1273h-5p,hsa-miR-6779-5p,hsa-miR-6780a-5p,hsa-miR-7106-5p	1.69893e-05	0.00038512	22.5043
1:219179147|219211752//ENST00000366927	ENST00000341298	2588	12	10	2	hsa-miR-6779-5p,hsa-miR-6780a-5p	0.000869077	0.00953846	43.1333
12:45931506|45934505//ENST00000369367	ENST00000341298	2588	5	10	2	hsa-miR-4476,hsa-miR-892b	0.000133596	0.00214995	103.52
12:31701863|31709425//ENST00000281471	ENST00000341298	2588	7	10	2	hsa-miR-1273h-5p,hsa-miR-6780a-5p	0.000279394	0.00390381	73.9429
6:85557976|85572374//ENST00000508980	ENST00000323492	2588	17	38	5	hsa-miR-1273g-3p,hsa-miR-4419b,hsa-miR-4537,hsa-miR-6771-5p,hsa-miR-6884-5p	2.83435e-06	8.27394e-05	20.031
2:159777938|159783469//ENST00000480212	ENST00000323492	2588	26	38	8	hsa-miR-1273g-3p,hsa-miR-4419b,hsa-miR-4722-5p,hsa-miR-508-5p,hsa-miR-6720-5p,hsa-miR-6808-5p,hsa-miR-6884-5p,hsa-miR-7703	1.28303e-09	8.70947e-08	20.9555
9:85669485|85692813//ENST00000337006	ENST00000393081	2588	13	28	3	hsa-miR-1275,hsa-miR-4472,hsa-miR-6870-5p	0.000301913	0.00415332	21.3297
2:205440370|205440672//ENST00000351153	ENST00000393081	2588	12	28	3	hsa-miR-4267,hsa-miR-4755-5p,hsa-miR-6870-5p	0.000233935	0.00338395	23.1071
15:29761139|29762438//ENST00000346128	ENST00000572467	2588	14	12	3	hsa-miR-1908-5p,hsa-miR-3960,hsa-miR-8072	2.69642e-05	0.000569125	46.2143
11:18564892|18578808//ENST00000320750	ENST00000572467	2588	9	12	2	hsa-miR-4723-5p,hsa-miR-939-5p	0.000697058	0.00803827	47.9259
10:60084602|60088358//ENST00000280772	ENST00000572467	2588	20	12	3	hsa-miR-1908-5p,hsa-miR-663a,hsa-miR-6787-5p	8.31314e-05	0.00145539	32.35
17:78086503|78087093//ENST00000301624	ENST00000572467	2588	28	12	5	hsa-miR-1908-5p,hsa-miR-3960,hsa-miR-663a,hsa-miR-6787-5p,hsa-miR-8072	7.66618e-08	3.4372e-06	38.5119
3:170454290|170454913//ENST00000488989	ENST00000572467	2588	32	12	3	hsa-miR-4651,hsa-miR-608,hsa-miR-6756-5p	0.000350489	0.00468078	20.2188
10:49474027|49500696//ENST00000623073	ENST00000572467	2588	47	12	5	hsa-miR-1908-5p,hsa-miR-3960,hsa-miR-663a,hsa-miR-6787-5p,hsa-miR-8072	1.14579e-06	3.75353e-05	22.9433
9:126381064|126395697//ENST00000361171	ENST00000572467	2588	35	12	4	hsa-miR-1908-5p,hsa-miR-4651,hsa-miR-6087,hsa-miR-663a	1.28668e-05	0.000303946	24.6476
18:24196125|24239382//ENST00000319481	ENST00000506939	2588	7	52	4	hsa-miR-185-5p,hsa-miR-3667-3p,hsa-miR-3677-5p,hsa-miR-6770-5p	4.85799e-06	0.000131926	28.4396
5:157359005|157361598//ENST00000435847	ENST00000379242	2588	29	12	3	hsa-miR-138-5p,hsa-miR-3194-3p,hsa-miR-874-3p	0.000260244	0.0036871	22.3103
14:22950314|22952683//ENST00000206474	ENST00000379242	2588	29	12	3	hsa-miR-5581-3p,hsa-miR-6872-3p,hsa-miR-766-3p	0.000260244	0.0036871	22.3103
12:91151654|91158509//ENST00000052754	ENST00000379242	2588	19	12	3	hsa-miR-138-5p,hsa-miR-3189-5p,hsa-miR-3194-3p	7.08471e-05	0.00127494	34.0526
6:118826147|118829250//ENST00000316316	ENST00000379242	2588	29	12	3	hsa-miR-3194-3p,hsa-miR-323a-5p,hsa-miR-5581-3p	0.000260244	0.0036871	22.3103
7:130945720|131052555//ENST00000451786	ENST00000396349	2588	28	30	7	hsa-miR-4419b,hsa-miR-4695-5p,hsa-miR-508-5p,hsa-miR-6086,hsa-miR-665,hsa-miR-6720-5p,hsa-miR-6884-5p	1.33586e-08	7.21146e-07	21.5667
6:85557976|85572374//ENST00000508980	ENST00000396349	2588	17	30	4	hsa-miR-1285-3p,hsa-miR-4419b,hsa-miR-4537,hsa-miR-6884-5p	3.14879e-05	0.000648737	20.298
X:118766530|118776511//ENST00000371666	ENST00000396349	2588	4	30	2	hsa-miR-4722-5p,hsa-miR-508-5p	0.000768456	0.00867188	43.1333
12:31701863|31709425//ENST00000281471	ENST00000396349	2588	7	30	4	hsa-miR-1273h-5p,hsa-miR-1299,hsa-miR-4722-5p,hsa-miR-6780a-5p	5.0203e-07	1.81871e-05	49.2952
2:159777938|159783469//ENST00000480212	ENST00000396349	2588	26	30	10	hsa-miR-1827,hsa-miR-4419b,hsa-miR-4695-5p,hsa-miR-4722-5p,hsa-miR-508-5p,hsa-miR-6086,hsa-miR-665,hsa-miR-6720-5p,hsa-miR-6884-5p,hsa-miR-7703	3.90301e-14	6.45966e-12	33.1795
10:60084602|60088358//ENST00000280772	ENST00000518681	2588	20	9	4	hsa-miR-1908-5p,hsa-miR-3141,hsa-miR-663a,hsa-miR-6787-5p	3.1933e-07	1.22025e-05	57.5111
17:78086503|78087093//ENST00000301624	ENST00000518681	2588	28	9	4	hsa-miR-1908-5p,hsa-miR-3960,hsa-miR-663a,hsa-miR-6787-5p	1.33279e-06	4.28406e-05	41.0794
10:49474027|49500696//ENST00000623073	ENST00000518681	2588	47	9	5	hsa-miR-1908-5p,hsa-miR-3960,hsa-miR-663a,hsa-miR-6768-5p,hsa-miR-6787-5p	1.89898e-07	7.69815e-06	30.591
2:100006632|100008932//ENST00000317233	ENST00000329276	2588	44	6	3	hsa-miR-1224-3p,hsa-miR-1306-5p,hsa-miR-6766-5p	8.85579e-05	0.00153404	29.4091
3:12516611|12532773//ENST00000473755	ENST00000329276	2588	85	6	5	hsa-miR-1224-3p,hsa-miR-2110,hsa-miR-4758-3p,hsa-miR-5093,hsa-miR-6766-5p	1.98943e-07	8.02431e-06	25.3725
10:110100625|110112915//ENST00000497125	ENST00000409041	2588	9	38	3	hsa-miR-4259,hsa-miR-6780a-5p,hsa-miR-7106-5p	0.000230997	0.00335066	22.7018
17:64562771|64571956//ENST00000262435	ENST00000409041	2588	11	38	4	hsa-miR-3189-3p,hsa-miR-3913-5p,hsa-miR-4695-5p,hsa-miR-8052	1.213e-05	0.000289125	24.7656
10:110100625|110112915//ENST00000277900	ENST00000409041	2588	10	38	3	hsa-miR-4259,hsa-miR-6780a-5p,hsa-miR-7106-5p	0.000326653	0.00442537	20.4316
2:11566480|11576535//ENST00000234142	ENST00000449534	2588	12	22	3	hsa-miR-4731-5p,hsa-miR-637,hsa-miR-6859-3p	0.000111713	0.00185737	29.4091
9:76067955|76071898//ENST00000376752	ENST00000582137	2588	11	5	2	hsa-miR-6751-5p,hsa-miR-6803-5p	0.000163157	0.00253039	94.1091
5:173108624|173123202//ENST00000520464	ENST00000582137	2588	68	5	3	hsa-miR-6751-5p,hsa-miR-6803-5p,hsa-miR-7110-5p	0.00016719	0.00258197	22.8353
7:137912991|137916012//ENST00000330387	ENST00000582137	2588	17	5	2	hsa-miR-6751-5p,hsa-miR-6803-5p	0.00040157	0.00521409	60.8941
X:40588986|40597664//ENST00000636574	ENST00000582137	2588	24	5	2	hsa-miR-6751-5p,hsa-miR-6803-5p	0.000810534	0.00903982	43.1333
2:99418828|99435941//ENST00000258428	ENST00000582137	2588	17	5	2	hsa-miR-6751-5p,hsa-miR-6803-5p	0.00040157	0.00521409	60.8941
11:46889411|46890494//ENST00000378623	ENST00000582137	2588	39	5	3	hsa-miR-6751-5p,hsa-miR-6803-5p,hsa-miR-7110-5p	3.10129e-05	0.000640557	39.8154
4:74174506|74225394//ENST00000325278	ENST00000582137	2588	19	5	2	hsa-miR-6751-5p,hsa-miR-6803-5p	0.000504132	0.00624037	54.4842
2:99418828|99435941//ENST00000393445	ENST00000582137	2588	17	5	2	hsa-miR-6751-5p,hsa-miR-6803-5p	0.00040157	0.00521409	60.8941
1:146617029|146650451//ENST00000614586	ENST00000582137	2588	64	5	3	hsa-miR-6751-5p,hsa-miR-6803-5p,hsa-miR-7110-5p	0.000139322	0.00222423	24.2625
X:40588986|40597664//ENST00000378438	ENST00000582137	2588	25	5	2	hsa-miR-6751-5p,hsa-miR-6803-5p	0.000880331	0.00963109	41.408
X:40588986|40597664//ENST00000636287	ENST00000582137	2588	24	5	2	hsa-miR-6751-5p,hsa-miR-6803-5p	0.000810534	0.00903982	43.1333
2:99412731|99435941//ENST00000393445	ENST00000582137	2588	20	5	2	hsa-miR-6751-5p,hsa-miR-6803-5p	0.000559712	0.00677542	51.76
2:99412731|99435941//ENST00000258428	ENST00000582137	2588	20	5	2	hsa-miR-6751-5p,hsa-miR-6803-5p	0.000559712	0.00677542	51.76
2:216141186|216148276//ENST00000392132	ENST00000582137	2588	8	5	2	hsa-miR-6751-5p,hsa-miR-6803-5p	8.3255e-05	0.00145704	129.4
4:147939825|148023413//ENST00000336498	ENST00000582137	2588	33	5	3	hsa-miR-6751-5p,hsa-miR-6803-5p,hsa-miR-7110-5p	1.85799e-05	0.000415656	47.0545
15:43756649|43763206//ENST00000300289	ENST00000621318	2588	5	19	2	hsa-miR-296-3p,hsa-miR-6823-5p	0.000504132	0.00624037	54.4842
11:118556906|118559864//ENST00000264020	ENST00000621318	2588	20	19	3	hsa-miR-4688,hsa-miR-486-3p,hsa-miR-6743-5p	0.000353703	0.00471303	20.4316
5:618990|620261//ENST00000264935	ENST00000508989	2588	11	7	2	hsa-miR-5092,hsa-miR-6874-5p	0.000341041	0.00458098	67.2208
7:24623663|24668660//ENST00000222644	ENST00000625938	2588	19	20	3	hsa-miR-3689d,hsa-miR-4632-5p,hsa-miR-532-3p	0.000353703	0.00471303	20.4316
8:47407861|47440542//ENST00000297423	ENST00000591470	2588	22	35	8	hsa-miR-1249-5p,hsa-miR-149-3p,hsa-miR-4728-5p,hsa-miR-4739,hsa-miR-6779-5p,hsa-miR-6780a-5p,hsa-miR-6797-5p,hsa-miR-6883-5p	1.33711e-10	1.11815e-08	26.8883
1:35470863|35479212//ENST00000431916	ENST00000591470	2588	13	35	4	hsa-miR-1249-5p,hsa-miR-6127,hsa-miR-6133,hsa-miR-6797-5p	1.84071e-05	0.000412296	22.7516
4:3186597|3189093//ENST00000355072	ENST00000591470	2588	17	35	5	hsa-miR-1249-5p,hsa-miR-4739,hsa-miR-6127,hsa-miR-6133,hsa-miR-6797-5p	1.85473e-06	5.71961e-05	21.7479
4:17909094|17972885//ENST00000510451	ENST00000374700	2588	11	10	2	hsa-miR-133a-3p,hsa-miR-133b	0.000725728	0.00829611	47.0545
2:119920069|119955323//ENST00000263708	ENST00000374700	2588	25	10	3	hsa-miR-133a-3p,hsa-miR-133b,hsa-miR-4539	9.14558e-05	0.00157645	31.056
4:17909094|17972885//ENST00000326877	ENST00000374700	2588	11	10	2	hsa-miR-133a-3p,hsa-miR-133b	0.000725728	0.00829611	47.0545
3:183650296|183665039//ENST00000242810	ENST00000374700	2588	28	10	3	hsa-miR-133a-3p,hsa-miR-133b,hsa-miR-5187-5p	0.00012947	0.00209478	27.7286
16:57204504|57217035//ENST00000394420	ENST00000357376	2588	28	17	4	hsa-miR-608,hsa-miR-6742-5p,hsa-miR-6796-5p,hsa-miR-6812-5p	2.37167e-05	0.000510684	21.7479
2:160313156|160367391//ENST00000348849	ENST00000357376	2588	37	17	6	hsa-miR-4651,hsa-miR-608,hsa-miR-6737-5p,hsa-miR-6796-5p,hsa-miR-6812-5p,hsa-miR-6819-5p	6.18844e-08	2.84041e-06	24.6868
18:13681605|13682105//ENST00000322247	ENST00000357376	2588	12	17	3	hsa-miR-4651,hsa-miR-6812-5p,hsa-miR-6819-5p	4.99784e-05	0.000955537	38.0588
3:170454290|170454913//ENST00000488989	ENST00000357376	2588	32	17	5	hsa-miR-33b-3p,hsa-miR-4651,hsa-miR-608,hsa-miR-6742-5p,hsa-miR-6819-5p	1.16408e-06	3.80508e-05	23.7868
7:130026158|130049144//ENST00000471022	ENST00000247219	2588	24	22	5	hsa-miR-1231,hsa-miR-3155a,hsa-miR-3155b,hsa-miR-4692,hsa-miR-6511a-5p	1.04601e-06	3.46793e-05	24.5076
8:42861745|42874006//ENST00000526349	ENST00000247219	2588	17	22	3	hsa-miR-4692,hsa-miR-6511a-5p,hsa-miR-764	0.000335889	0.00452468	20.7594
8:42861745|42874006//ENST00000240159	ENST00000247219	2588	17	22	3	hsa-miR-4692,hsa-miR-6511a-5p,hsa-miR-764	0.000335889	0.00452468	20.7594
5:138198199|138202155//ENST00000394886	ENST00000247219	2588	14	22	3	hsa-miR-1231,hsa-miR-3155a,hsa-miR-3155b	0.000182804	0.00277578	25.2078
X:135545423|135552146//ENST00000370752	ENST00000247219	2588	24	22	5	hsa-miR-4530,hsa-miR-4647,hsa-miR-4673,hsa-miR-4692,hsa-miR-6511a-5p	1.04601e-06	3.46793e-05	24.5076
2:200419250|200419496//ENST00000358677	ENST00000394901	2588	12	42	5	hsa-miR-1291,hsa-miR-3173-5p,hsa-miR-6747-3p,hsa-miR-6775-3p,hsa-miR-6799-3p	6.42715e-07	2.26182e-05	25.6746
9:77794463|77922345//ENST00000286548	ENST00000377811	2588	20	22	5	hsa-miR-1207-5p,hsa-miR-4763-3p,hsa-miR-6808-5p,hsa-miR-6893-5p,hsa-miR-92a-2-5p	3.90058e-07	1.45615e-05	29.4091
1:52490732|52509712//ENST00000257177	ENST00000377811	2588	18	22	4	hsa-miR-1207-5p,hsa-miR-4763-3p,hsa-miR-6722-3p,hsa-miR-6780b-5p	1.10994e-05	0.000267951	26.1414
8:30680904|30700135//ENST00000537535	ENST00000377811	2588	23	22	4	hsa-miR-4651,hsa-miR-608,hsa-miR-6752-5p,hsa-miR-7110-5p	3.12332e-05	0.000644317	20.4585
22:24302195|24313466//ENST00000314328	ENST00000377811	2588	17	22	4	hsa-miR-1207-5p,hsa-miR-4763-3p,hsa-miR-6722-3p,hsa-miR-7150	8.68131e-06	0.000217085	27.6791
17:20253505|20306082//ENST00000261503	ENST00000377811	2588	33	22	7	hsa-miR-4514,hsa-miR-4692,hsa-miR-4725-3p,hsa-miR-6780b-5p,hsa-miR-6808-5p,hsa-miR-6893-5p,hsa-miR-92a-2-5p	4.16795e-09	2.52466e-07	24.9532
2:43726272|43738520//ENST00000282406	ENST00000371123	2588	19	4	2	hsa-miR-3660,hsa-miR-4526	0.00030381	0.00417402	68.1053
8:89970364|89978323//ENST00000265433	ENST00000371123	2588	9	4	2	hsa-miR-3660,hsa-miR-4526	6.42916e-05	0.0011777	143.778
1:176043186|176136547//ENST00000367667	ENST00000371123	2588	21	4	2	hsa-miR-3660,hsa-miR-4526	0.000372714	0.00491467	61.619
3:149846011|149872154//ENST00000344229	ENST00000371123	2588	8	4	2	hsa-miR-3660,hsa-miR-4526	5.00304e-05	0.000956317	161.75
3:170136419|170178938//ENST00000467570	ENST00000371123	2588	29	4	2	hsa-miR-3660,hsa-miR-4526	0.000717598	0.00822446	44.6207
6:136637325|136659378//ENST00000359015	ENST00000371123	2588	8	4	2	hsa-miR-3660,hsa-miR-4526	5.00304e-05	0.000956317	161.75
10:102023477|102029745//ENST00000370033	ENST00000409163	2588	5	15	2	hsa-miR-3064-5p,hsa-miR-5010-5p	0.000310517	0.00424925	69.0133
15:41085369|41087682//ENST00000361937	ENST00000409163	2588	13	15	3	hsa-miR-1183,hsa-miR-4716-3p,hsa-miR-6798-5p	4.35499e-05	0.000851403	39.8154
12:68690631|68715740//ENST00000229179	ENST00000409163	2588	20	15	3	hsa-miR-1301-3p,hsa-miR-22-3p,hsa-miR-3064-5p	0.0001694	0.00261006	25.88
9:137728349|137744090//ENST00000637261	ENST00000367749	2588	32	12	4	hsa-let-7a-5p,hsa-let-7b-5p,hsa-let-7c-5p,hsa-let-7f-5p	8.90311e-06	0.000221862	26.9583
4:39869394|39890364//ENST00000303538	ENST00000367749	2588	24	12	3	hsa-let-7b-5p,hsa-let-7e-5p,hsa-miR-4458	0.000146055	0.00231123	26.9583
9:137728349|137744090//ENST00000626066	ENST00000367749	2588	28	12	4	hsa-let-7a-5p,hsa-let-7b-5p,hsa-let-7c-5p,hsa-let-7f-5p	5.12009e-06	0.000137997	30.8095
6:85557976|85572374//ENST00000508980	ENST00000367749	2588	17	12	3	hsa-let-7b-5p,hsa-let-7c-5p,hsa-let-7e-5p	4.99784e-05	0.000955537	38.0588
4:39874289|39890364//ENST00000303538	ENST00000367749	2588	18	12	3	hsa-let-7b-5p,hsa-let-7e-5p,hsa-miR-4458	5.98172e-05	0.00110955	35.9444
9:137728349|137744090//ENST00000371394	ENST00000367749	2588	28	12	4	hsa-let-7a-5p,hsa-let-7b-5p,hsa-let-7c-5p,hsa-let-7f-5p	5.12009e-06	0.000137997	30.8095
1:95143891|95173889//ENST00000370203	ENST00000367749	2588	11	12	3	hsa-let-7a-5p,hsa-let-7d-5p,hsa-let-7e-5p	1.23191e-05	0.000292915	58.8182
14:80862757|80906081//ENST00000216517	ENST00000367749	2588	31	12	4	hsa-let-7b-5p,hsa-let-7c-5p,hsa-let-7e-5p,hsa-miR-4458	7.80967e-06	0.0001984	27.828
2:159777938|159783469//ENST00000480212	ENST00000367749	2588	26	12	5	hsa-let-7a-5p,hsa-let-7b-5p,hsa-let-7c-5p,hsa-let-7d-5p,hsa-let-7e-5p	5.15446e-08	2.41202e-06	41.4744
3:20095263|20114988//ENST00000263754	ENST00000367749	2588	23	12	4	hsa-let-7a-5p,hsa-let-7c-5p,hsa-let-7d-5p,hsa-let-7e-5p	2.24209e-06	6.74812e-05	37.5072
11:47815479|47819458//ENST00000378460	ENST00000350026	2588	13	21	3	hsa-miR-214-3p,hsa-miR-2467-3p,hsa-miR-3619-5p	0.000125096	0.00203727	28.4396
6:80167678|80203212//ENST00000320393	ENST00000350026	2588	16	21	3	hsa-miR-4778-3p,hsa-miR-6076,hsa-miR-6875-3p	0.000241128	0.00346757	23.1071
7:140702866|140704963//ENST00000247866	ENST00000540248	2588	7	17	2	hsa-miR-204-3p,hsa-miR-4646-5p	0.000836792	0.00926133	43.4958
17:50736960|50741731//ENST00000240304	ENST00000540248	2588	5	17	2	hsa-miR-4640-5p,hsa-miR-4726-5p	0.00040157	0.00521409	60.8941
5:157518823|157537991//ENST00000257527	ENST00000617201	2588	19	21	4	hsa-miR-3184-5p,hsa-miR-4756-5p,hsa-miR-6754-5p,hsa-miR-6785-5p	1.14923e-05	0.000276074	25.9449
16:15776078|15786732//ENST00000300036	ENST00000356458	2588	11	58	6	hsa-miR-1233-5p,hsa-miR-1273h-5p,hsa-miR-3689a-3p,hsa-miR-3689b-3p,hsa-miR-3689c,hsa-miR-6778-5p	4.13132e-08	1.98073e-06	24.3386
16:15776078|15786732//ENST00000396324	ENST00000356458	2588	13	58	7	hsa-miR-1233-5p,hsa-miR-1273h-5p,hsa-miR-3689a-3p,hsa-miR-3689b-3p,hsa-miR-3689c,hsa-miR-6778-5p,hsa-miR-6806-5p	3.03645e-09	1.89764e-07	24.0265
17:60683982|60709325//ENST00000390652	ENST00000391809	2588	3	33	2	hsa-miR-3158-5p,hsa-miR-6757-5p	0.000469396	0.00589834	52.2828
10:12117673|12120267//ENST00000263035	ENST00000391809	2588	8	33	3	hsa-miR-4747-5p,hsa-miR-5196-5p,hsa-miR-7113-5p	0.000101357	0.0017149	29.4091
1:64629355|64634260//ENST00000495994	ENST00000391809	2588	8	33	3	hsa-miR-204-3p,hsa-miR-3652,hsa-miR-4430	0.000101357	0.0017149	29.4091
3:183033991|183041750//ENST00000497959	ENST00000471642	2588	11	9	2	hsa-miR-149-5p,hsa-miR-2861	0.000581933	0.00698748	52.2828
17:14074323|14077056//ENST00000261643	ENST00000471642	2588	12	9	2	hsa-miR-149-5p,hsa-miR-6881-3p	0.000697058	0.00803827	47.9259
12:46229153|46254936//ENST00000439706	ENST00000610545	2588	21	18	3	hsa-miR-2110,hsa-miR-4667-5p,hsa-miR-8089	0.0003477	0.00465132	20.5397
17:78392476|78398351//ENST00000589426	ENST00000610545	2588	28	18	4	hsa-miR-2110,hsa-miR-4667-5p,hsa-miR-4700-5p,hsa-miR-8089	3.02663e-05	0.000627429	20.5397
2:58198579|58232112//ENST00000402135	ENST00000610545	2588	18	18	4	hsa-miR-4667-5p,hsa-miR-4695-5p,hsa-miR-4700-5p,hsa-miR-8089	4.72465e-06	0.000128836	31.9506
2:201565729|201575326//ENST00000286195	ENST00000610545	2588	6	18	2	hsa-miR-4700-5p,hsa-miR-8089	0.000674333	0.00783635	47.9259
9:111914605|111926496//ENST00000374279	ENST00000483970	2588	9	9	2	hsa-miR-6815-5p,hsa-miR-6865-5p	0.000382281	0.00501236	63.9012
4:109659011|109664394//ENST00000394650	ENST00000483970	2588	5	9	2	hsa-miR-6815-5p,hsa-miR-6865-5p	0.000106959	0.00179235	115.022
9:111914605|111926496//ENST00000495085	ENST00000483970	2588	9	9	2	hsa-miR-6815-5p,hsa-miR-6865-5p	0.000382281	0.00501236	63.9012
1:52490732|52509712//ENST00000257177	ENST00000483970	2588	18	9	3	hsa-miR-6134,hsa-miR-6815-5p,hsa-miR-6865-5p	2.31401e-05	0.000500372	47.9259
6:136147351|136155758//ENST00000308191	ENST00000483970	2588	19	9	4	hsa-miR-4701-3p,hsa-miR-6736-5p,hsa-miR-6815-5p,hsa-miR-6865-5p	2.55862e-07	1.00283e-05	60.538
15:99671323|99675458//ENST00000338042	ENST00000483970	2588	21	9	4	hsa-miR-6134,hsa-miR-6815-5p,hsa-miR-6865-5p,hsa-miR-7162-3p	3.93854e-07	1.4687e-05	54.7725
5:74813840|74841679//ENST00000510609	ENST00000437775	2588	11	37	5	hsa-miR-106a-5p,hsa-miR-106b-5p,hsa-miR-17-5p,hsa-miR-20a-5p,hsa-miR-20b-5p	1.96346e-07	7.93095e-06	31.7936
5:108946130|108959347//ENST00000281092	ENST00000437775	2588	19	37	6	hsa-miR-106a-5p,hsa-miR-106b-5p,hsa-miR-17-5p,hsa-miR-20a-5p,hsa-miR-20b-5p,hsa-miR-93-5p	1.32888e-07	5.60844e-06	22.0882
17:37283267|37289528//ENST00000615229	ENST00000437775	2588	8	37	3	hsa-miR-216a-3p,hsa-miR-3135b,hsa-miR-3934-5p	0.000143503	0.00227902	26.2297
5:74834426|74841679//ENST00000389156	ENST00000437775	2588	12	37	6	hsa-miR-106a-5p,hsa-miR-106b-5p,hsa-miR-17-5p,hsa-miR-20a-5p,hsa-miR-20b-5p,hsa-miR-6878-3p	4.86583e-09	2.90269e-07	34.973
5:74813840|74841679//ENST00000389156	ENST00000437775	2588	14	37	6	hsa-miR-106a-5p,hsa-miR-106b-5p,hsa-miR-17-5p,hsa-miR-20a-5p,hsa-miR-20b-5p,hsa-miR-6878-3p	1.54899e-08	8.23559e-07	29.9768
5:618990|620261//ENST00000264935	ENST00000266579	2588	11	17	3	hsa-miR-3150b-3p,hsa-miR-3665,hsa-miR-4784	3.76367e-05	0.000753606	41.5187
2:58198579|58232112//ENST00000402135	ENST00000266579	2588	18	17	4	hsa-miR-1205,hsa-miR-3150b-3p,hsa-miR-4689,hsa-miR-6858-5p	3.69075e-06	0.000104077	33.8301
2:97144518|97187226//ENST00000420699	ENST00000266579	2588	19	17	4	hsa-miR-3150b-3p,hsa-miR-4689,hsa-miR-4784,hsa-miR-6858-5p	4.6561e-06	0.000127213	32.0495
3:47675475|47686170//ENST00000254480	ENST00000266579	2588	21	17	3	hsa-miR-4689,hsa-miR-6732-5p,hsa-miR-6858-5p	0.00029127	0.00403626	21.7479
12:105203703|105211317//ENST00000258530	ENST00000513574	2588	21	4	3	hsa-miR-520b,hsa-miR-520c-3p,hsa-miR-526b-3p	1.834e-06	5.666e-05	92.4286
12:105203703|105211317//ENST00000551662	ENST00000513574	2588	21	4	3	hsa-miR-520b,hsa-miR-520c-3p,hsa-miR-526b-3p	1.834e-06	5.666e-05	92.4286
3:98768430|98773983//ENST00000394162	ENST00000301310	2588	10	29	3	hsa-miR-6758-5p,hsa-miR-6856-5p,hsa-miR-7848-3p	0.000144114	0.00228688	26.7724
3:98768430|98773983//ENST00000265261	ENST00000301310	2588	13	29	3	hsa-miR-6758-5p,hsa-miR-6856-5p,hsa-miR-7848-3p	0.00033577	0.00452454	20.5942
6:169762429|169769713//ENST00000366772	ENST00000301310	2588	10	29	3	hsa-miR-3155a,hsa-miR-3155b,hsa-miR-519e-5p	0.000144114	0.00228688	26.7724
6:169762429|169769713//ENST00000588451	ENST00000301310	2588	10	29	3	hsa-miR-3155a,hsa-miR-3155b,hsa-miR-519e-5p	0.000144114	0.00228688	26.7724
15:48596283|48613092//ENST00000316623	ENST00000427255	2588	19	4	2	hsa-miR-6500-5p,hsa-miR-708-5p	0.00030381	0.00417402	68.1053
8:97686668|97691188//ENST00000336273	ENST00000440428	2588	11	22	3	hsa-miR-4673,hsa-miR-4692,hsa-miR-6512-3p	8.42491e-05	0.0014713	32.0826
1:202750659|202758510//ENST00000235790	ENST00000440428	2588	22	22	4	hsa-miR-497-5p,hsa-miR-6512-3p,hsa-miR-6720-5p,hsa-miR-6810-5p	2.59461e-05	0.000550862	21.3884
12:3821873|3863957//ENST00000427057	ENST00000447266	2588	13	24	3	hsa-miR-127-5p,hsa-miR-3928-5p,hsa-miR-6806-3p	0.000188716	0.00284741	24.8846
1:148135672|148143686//ENST00000615281	ENST00000447266	2588	14	24	3	hsa-miR-127-5p,hsa-miR-3928-5p,hsa-miR-6806-3p	0.000238722	0.00343951	23.1071
12:68816812|68824651//ENST00000258149	ENST00000447266	2588	11	24	3	hsa-miR-127-5p,hsa-miR-3928-5p,hsa-miR-6806-3p	0.000110212	0.00183693	29.4091
1:148135672|148143686//ENST00000614506	ENST00000447266	2588	12	24	3	hsa-miR-127-5p,hsa-miR-3928-5p,hsa-miR-6806-3p	0.000146055	0.00231123	26.9583
1:52490732|52509712//ENST00000257177	ENST00000609664	2588	18	38	6	hsa-miR-3919,hsa-miR-4271,hsa-miR-6722-3p,hsa-miR-6780b-5p,hsa-miR-6815-5p,hsa-miR-6865-5p	1.08658e-07	4.69213e-06	22.7018
3:65018441|65050822//XLOC.132426.15	ENST00000262992	2588	25	15	3	hsa-miR-4502,hsa-miR-4739,hsa-miR-7106-5p	0.000335855	0.00452468	20.704
13:98409338|98412034//ENST00000319562	ENST00000536404	2588	26	12	3	hsa-miR-1909-3p,hsa-miR-4763-3p,hsa-miR-7150	0.000186639	0.00282301	24.8846
6:73479732|73480805//ENST00000462039	ENST00000536404	2588	40	12	4	hsa-miR-1207-5p,hsa-miR-4763-3p,hsa-miR-6798-5p,hsa-miR-7150	2.21792e-05	0.000482952	21.5667
9:79612656|79654075//ENST00000435650	ENST00000536404	2588	38	12	5	hsa-miR-1207-5p,hsa-miR-1909-3p,hsa-miR-4763-3p,hsa-miR-6798-5p,hsa-miR-7150	3.82715e-07	1.43209e-05	28.3772
11:61271675|61274584//ENST00000301770	ENST00000536404	2588	32	12	3	hsa-miR-1207-5p,hsa-miR-4763-3p,hsa-miR-7150	0.000350489	0.00468078	20.2188
22:24302195|24313466//ENST00000314328	ENST00000536404	2588	17	12	4	hsa-miR-1207-5p,hsa-miR-1909-3p,hsa-miR-4763-3p,hsa-miR-7150	6.1168e-07	2.16526e-05	50.7451
16:30704064|30704315//ENST00000262518	ENST00000536404	2588	32	12	3	hsa-miR-1207-5p,hsa-miR-1909-3p,hsa-miR-4763-3p	0.000350489	0.00468078	20.2188
6:73479732|73480805//ENST00000370300	ENST00000536404	2588	35	12	4	hsa-miR-1207-5p,hsa-miR-4763-3p,hsa-miR-6798-5p,hsa-miR-7150	1.28668e-05	0.000303946	24.6476
9:79612656|79654075//ENST00000376537	ENST00000536404	2588	38	12	5	hsa-miR-1207-5p,hsa-miR-1909-3p,hsa-miR-4763-3p,hsa-miR-6798-5p,hsa-miR-7150	3.82715e-07	1.43209e-05	28.3772
9:79612656|79654075//ENST00000265284	ENST00000536404	2588	32	12	5	hsa-miR-1207-5p,hsa-miR-1909-3p,hsa-miR-4763-3p,hsa-miR-6798-5p,hsa-miR-7150	1.55657e-07	6.45366e-06	33.6979
11:63895159|63895633//ENST00000350490	ENST00000592005	2588	19	10	3	hsa-miR-3135b,hsa-miR-4430,hsa-miR-924	3.90051e-05	0.000776297	40.8632
1:35470863|35479212//ENST00000431916	ENST00000583917	2588	13	42	5	hsa-miR-1249-5p,hsa-miR-4731-5p,hsa-miR-5787,hsa-miR-6133,hsa-miR-6797-5p	1.03195e-06	3.42661e-05	23.6996
19:8468774|8474244//ENST00000600092	ENST00000583917	2588	12	42	4	hsa-miR-1249-5p,hsa-miR-4459,hsa-miR-6797-5p,hsa-miR-6887-3p	2.70285e-05	0.000570239	20.5397
4:3186597|3189093//ENST00000355072	ENST00000583917	2588	17	42	6	hsa-miR-1249-5p,hsa-miR-4419a,hsa-miR-4739,hsa-miR-6133,hsa-miR-6797-5p,hsa-miR-7106-5p	1.37087e-07	5.76695e-06	21.7479
1:27668226|27669346//ENST00000361157	ENST00000398462	2588	20	2	2	hsa-miR-5581-5p,hsa-miR-6747-3p	5.67575e-05	0.00106194	129.4
1:27668226|27669346//ENST00000362020	ENST00000398462	2588	21	2	2	hsa-miR-5581-5p,hsa-miR-6747-3p	6.27319e-05	0.00115373	123.238
1:27668226|27669346//ENST00000339145	ENST00000398462	2588	21	2	2	hsa-miR-5581-5p,hsa-miR-6747-3p	6.27319e-05	0.00115373	123.238
5:74813840|74841679//ENST00000510609	ENST00000358598	2588	11	40	4	hsa-miR-106a-5p,hsa-miR-106b-5p,hsa-miR-17-5p,hsa-miR-20a-5p	1.49526e-05	0.000345506	23.5273
5:74834426|74841679//ENST00000389156	ENST00000358598	2588	12	40	4	hsa-miR-106a-5p,hsa-miR-106b-5p,hsa-miR-17-5p,hsa-miR-20a-5p	2.21792e-05	0.000482952	21.5667
8:18799295|18804898//ENST00000286485	ENST00000375960	2588	6	17	2	hsa-miR-134-5p,hsa-miR-3187-3p	0.000600027	0.00715399	50.7451
12:31701863|31709425//ENST00000281471	ENST00000357167	2588	7	65	4	hsa-miR-1273h-5p,hsa-miR-1299,hsa-miR-4722-5p,hsa-miR-6780a-5p	1.20009e-05	0.000286484	22.7516
2:32098796|32116212//ENST00000315285	ENST00000513858	2588	16	7	2	hsa-miR-1238-5p,hsa-miR-4758-5p	0.000739301	0.00841095	46.2143
X:53600118|53604834//ENST00000218328	ENST00000513858	2588	55	7	3	hsa-miR-4277,hsa-miR-4739,hsa-miR-6753-5p	0.000299455	0.00412675	20.1662
X:53600118|53604834//ENST00000612484	ENST00000513858	2588	52	7	3	hsa-miR-4277,hsa-miR-4739,hsa-miR-6753-5p	0.000253147	0.00360574	21.3297
4:3186597|3189093//ENST00000355072	ENST00000513858	2588	17	7	2	hsa-miR-2115-3p,hsa-miR-4739	0.000836792	0.00926133	43.4958
5:74813840|74841679//ENST00000510609	ENST00000238146	2588	11	21	3	hsa-miR-17-5p,hsa-miR-20a-5p,hsa-miR-20b-5p	7.29303e-05	0.00130537	33.6104
5:108946130|108959347//ENST00000281092	ENST00000238146	2588	19	21	5	hsa-miR-17-5p,hsa-miR-20a-5p,hsa-miR-20b-5p,hsa-miR-2115-3p,hsa-miR-93-5p	2.28341e-07	9.0667e-06	32.4311
5:74834426|74841679//ENST00000389156	ENST00000238146	2588	12	21	3	hsa-miR-17-5p,hsa-miR-20a-5p,hsa-miR-20b-5p	9.67328e-05	0.00165007	30.8095
5:74813840|74841679//ENST00000389156	ENST00000238146	2588	14	21	3	hsa-miR-17-5p,hsa-miR-20a-5p,hsa-miR-20b-5p	0.000158382	0.00247022	26.4082
7:130170400|130181719//ENST00000473456	ENST00000238146	2588	18	21	3	hsa-miR-17-5p,hsa-miR-20b-5p,hsa-miR-93-5p	0.0003477	0.00465132	20.5397
18:54277703|54284013//ENST00000406285	ENST00000401461	2588	8	27	3	hsa-miR-1301-3p,hsa-miR-4701-3p,hsa-miR-5047	5.4816e-05	0.00103158	35.9444
6:136147351|136155758//ENST00000308191	ENST00000401461	2588	19	27	4	hsa-miR-4530,hsa-miR-4701-3p,hsa-miR-6736-5p,hsa-miR-6776-5p	3.27689e-05	0.00067042	20.1793
18:54277703|54284013//ENST00000579434	ENST00000401461	2588	11	27	3	hsa-miR-1301-3p,hsa-miR-4701-3p,hsa-miR-5047	0.000158164	0.00246781	26.1414
6:109475399|109476930//ENST00000230122	ENST00000447204	2588	13	25	3	hsa-miR-3665,hsa-miR-612,hsa-miR-6860	0.000213826	0.00314898	23.8892
2:183133566|183159652//ENST00000295119	ENST00000447204	2588	14	25	3	hsa-miR-4433a-3p,hsa-miR-612,hsa-miR-6860	0.000270408	0.0038023	22.1829
15:50300789|50304133//ENST00000220429	ENST00000582870	2588	13	4	2	hsa-miR-342-3p,hsa-miR-767-3p	0.000139011	0.00222093	99.5385
15:50300789|50304133//ENST00000359031	ENST00000582870	2588	13	4	2	hsa-miR-342-3p,hsa-miR-767-3p	0.000139011	0.00222093	99.5385
14:90676523|90689712//ENST00000328459	ENST00000582870	2588	20	4	2	hsa-miR-342-3p,hsa-miR-767-3p	0.000337392	0.00454099	64.7
12:22490123|22506819//ENST00000535555	ENST00000389817	2588	9	12	2	hsa-miR-6808-5p,hsa-miR-6893-5p	0.000697058	0.00803827	47.9259
2:24135119|24147086//ENST00000610442	ENST00000389817	2588	7	12	2	hsa-miR-4769-5p,hsa-miR-6728-5p	0.000408722	0.00528673	61.619
X:154789954|154792285//ENST00000369534	ENST00000389817	2588	16	12	3	hsa-miR-1207-5p,hsa-miR-4763-3p,hsa-miR-6721-5p	4.12666e-05	0.000813891	40.4375
18:21366027|21395561//ENST00000269218	ENST00000389817	2588	21	12	3	hsa-miR-4514,hsa-miR-4692,hsa-miR-6721-5p	9.67328e-05	0.00165007	30.8095
12:103733006|103737780//ENST00000388887	ENST00000389817	2588	36	12	4	hsa-miR-299-3p,hsa-miR-4514,hsa-miR-4692,hsa-miR-4769-5p	1.4439e-05	0.000335417	23.963
19:10904951|10909207//ENST00000590699	ENST00000389817	2588	36	12	7	hsa-miR-4514,hsa-miR-4673,hsa-miR-4692,hsa-miR-4763-3p,hsa-miR-6721-5p,hsa-miR-6808-5p,hsa-miR-6893-5p	4.11184e-11	3.81431e-09	41.9352
2:15603192|15607313//ENST00000233084	ENST00000389817	2588	8	12	2	hsa-miR-4514,hsa-miR-6808-5p	0.000543558	0.00662275	53.9167
19:10904951|10909207//ENST00000590039	ENST00000389817	2588	27	12	4	hsa-miR-4514,hsa-miR-4692,hsa-miR-4763-3p,hsa-miR-6721-5p	4.3996e-06	0.000121067	31.9506
11:61271675|61274584//ENST00000301770	ENST00000389817	2588	32	12	3	hsa-miR-1207-5p,hsa-miR-4763-3p,hsa-miR-6721-5p	0.000350489	0.00468078	20.2188
9:77794463|77922345//ENST00000286548	ENST00000389817	2588	20	12	4	hsa-miR-1207-5p,hsa-miR-4763-3p,hsa-miR-6808-5p,hsa-miR-6893-5p	1.23595e-06	4.00948e-05	43.1333
14:105252507|105272894//ENST00000327359	ENST00000389817	2588	21	12	3	hsa-miR-4514,hsa-miR-4673,hsa-miR-4692	9.67328e-05	0.00165007	30.8095
3:72832369|72844423//ENST00000325599	ENST00000389817	2588	10	12	2	hsa-miR-6721-5p,hsa-miR-6722-3p	0.000869077	0.00953846	43.1333
18:21366027|21395561//ENST00000580732	ENST00000389817	2588	21	12	3	hsa-miR-4514,hsa-miR-4692,hsa-miR-6721-5p	9.67328e-05	0.00165007	30.8095
1:52490732|52509712//ENST00000257177	ENST00000389817	2588	18	12	4	hsa-miR-1207-5p,hsa-miR-4763-3p,hsa-miR-6721-5p,hsa-miR-6722-3p	7.84493e-07	2.69515e-05	47.9259
18:21366027|21403994//ENST00000269218	ENST00000389817	2588	32	12	3	hsa-miR-4514,hsa-miR-4692,hsa-miR-6721-5p	0.000350489	0.00468078	20.2188
1:237364358|237388183//ENST00000366574	ENST00000389817	2588	26	12	3	hsa-miR-4692,hsa-miR-6808-5p,hsa-miR-6893-5p	0.000186639	0.00282301	24.8846
11:12764179|12902113//ENST00000527636	ENST00000389817	2588	55	12	6	hsa-miR-1207-5p,hsa-miR-4514,hsa-miR-4673,hsa-miR-4763-3p,hsa-miR-6808-5p,hsa-miR-6893-5p	5.85123e-08	2.70066e-06	23.5273
22:24302195|24313466//ENST00000314328	ENST00000389817	2588	17	12	4	hsa-miR-1207-5p,hsa-miR-4763-3p,hsa-miR-6721-5p,hsa-miR-6722-3p	6.1168e-07	2.16526e-05	50.7451
1:21001199|21111383//ENST00000356916	ENST00000389817	2588	60	12	7	hsa-miR-1207-5p,hsa-miR-4673,hsa-miR-4763-3p,hsa-miR-6721-5p,hsa-miR-6722-3p,hsa-miR-6808-5p,hsa-miR-6893-5p	1.82548e-09	1.1975e-07	25.1611
15:96285326|96290783//ENST00000561344	ENST00000389817	2588	20	12	3	hsa-miR-4514,hsa-miR-4673,hsa-miR-4692	8.31314e-05	0.00145539	32.35
16:30704064|30704315//ENST00000262518	ENST00000389817	2588	32	12	3	hsa-miR-1207-5p,hsa-miR-4763-3p,hsa-miR-6808-5p	0.000350489	0.00468078	20.2188
7:66771883|66775393//ENST00000284957	ENST00000389817	2588	23	12	3	hsa-miR-1207-5p,hsa-miR-4673,hsa-miR-6808-5p	0.000128134	0.00207726	28.1304
1:214451805|214464957//ENST00000366956	ENST00000389817	2588	39	12	5	hsa-miR-1207-5p,hsa-miR-4514,hsa-miR-4673,hsa-miR-6808-5p,hsa-miR-6893-5p	4.37997e-07	1.61299e-05	27.6496
13:35040933|35070852//ENST00000310336	ENST00000389817	2588	24	12	3	hsa-miR-4514,hsa-miR-4673,hsa-miR-4692	0.000146055	0.00231123	26.9583
9:79612656|79654075//ENST00000265284	ENST00000389817	2588	32	12	3	hsa-miR-1207-5p,hsa-miR-4763-3p,hsa-miR-6722-3p	0.000350489	0.00468078	20.2188
15:96285326|96290783//ENST00000502125	ENST00000389817	2588	18	12	3	hsa-miR-4514,hsa-miR-4673,hsa-miR-4692	5.98172e-05	0.00110955	35.9444
6:17507169|17513954//ENST00000229922	ENST00000389817	2588	12	12	3	hsa-miR-1207-5p,hsa-miR-4763-3p,hsa-miR-6721-5p	1.63826e-05	0.000373464	53.9167
2:24135119|24147086//ENST00000611127	ENST00000389817	2588	9	12	2	hsa-miR-4769-5p,hsa-miR-6728-5p	0.000697058	0.00803827	47.9259
18:21366027|21403994//ENST00000580732	ENST00000389817	2588	32	12	3	hsa-miR-4514,hsa-miR-4692,hsa-miR-6721-5p	0.000350489	0.00468078	20.2188
17:20253505|20306082//ENST00000261503	ENST00000389817	2588	33	12	4	hsa-miR-4514,hsa-miR-4692,hsa-miR-6808-5p,hsa-miR-6893-5p	1.01059e-05	0.000247319	26.1414
3:20095263|20114988//ENST00000263754	ENST00000382389	2588	23	5	2	hsa-miR-3529-5p,hsa-miR-379-5p	0.000743567	0.00844785	45.0087
8:47407861|47440542//ENST00000297423	ENST00000373042	2588	22	31	6	hsa-miR-1249-5p,hsa-miR-149-3p,hsa-miR-1972,hsa-miR-4728-5p,hsa-miR-6797-5p,hsa-miR-8089	1.15863e-07	4.96678e-06	22.7683
10:118685983|118695230//ENST00000369151	ENST00000373042	2588	20	31	5	hsa-miR-1249-5p,hsa-miR-3663-5p,hsa-miR-3943,hsa-miR-4510,hsa-miR-6133	2.40877e-06	7.18082e-05	20.871
1:35470863|35479212//ENST00000325722	ENST00000373042	2588	16	31	4	hsa-miR-1249-5p,hsa-miR-6133,hsa-miR-6797-5p,hsa-miR-6861-5p	2.77665e-05	0.000583229	20.871
1:35470863|35479212//ENST00000431916	ENST00000373042	2588	13	31	4	hsa-miR-1249-5p,hsa-miR-6133,hsa-miR-6797-5p,hsa-miR-6861-5p	1.11864e-05	0.000269746	25.6873
10:118685983|118695230//ENST00000493518	ENST00000373042	2588	20	31	5	hsa-miR-1249-5p,hsa-miR-3663-5p,hsa-miR-3943,hsa-miR-4510,hsa-miR-6133	2.40877e-06	7.18082e-05	20.871
5:34922217|34923234//ENST00000510960	ENST00000229243	2588	4	26	2	hsa-miR-128-1-5p,hsa-miR-128-2-5p	0.000575327	0.00692807	49.7692
3:12516611|12532773//ENST00000284995	ENST00000229243	2588	13	26	3	hsa-miR-1587,hsa-miR-3183,hsa-miR-3620-5p	0.000241014	0.00346688	22.9704
5:40764514|40771863//ENST00000354209	ENST00000229243	2588	13	26	3	hsa-miR-326,hsa-miR-328-3p,hsa-miR-330-5p	0.000241014	0.00346688	22.9704
2:160313156|160367391//ENST00000348849	ENST00000229243	2588	37	26	8	hsa-miR-1587,hsa-miR-3620-5p,hsa-miR-4505,hsa-miR-5001-5p,hsa-miR-5787,hsa-miR-6812-5p,hsa-miR-6819-5p,hsa-miR-762	1.01929e-09	7.07282e-08	21.5218
5:168683966|168685927//ENST00000518092	ENST00000229243	2588	23	26	5	hsa-miR-1204,hsa-miR-1587,hsa-miR-3620-5p,hsa-miR-5001-5p,hsa-miR-6747-5p	2.03189e-06	6.19353e-05	21.6388
5:168683966|168685927//ENST00000332966	ENST00000229243	2588	29	26	6	hsa-miR-1204,hsa-miR-1587,hsa-miR-3620-5p,hsa-miR-5001-5p,hsa-miR-6747-5p,hsa-miR-7155-5p	2.26076e-07	8.98724e-06	20.5942
6:73466209|73466606//ENST00000370300	ENST00000615849	2588	11	33	3	hsa-miR-1972,hsa-miR-4494,hsa-miR-7161-3p	0.000290922	0.00403265	21.3884
12:91151654|91158509//ENST00000052754	ENST00000615849	2588	19	33	5	hsa-miR-3194-3p,hsa-miR-4533,hsa-miR-4660,hsa-miR-4747-5p,hsa-miR-5196-5p	2.52179e-06	7.47566e-05	20.638
11:108688936|108706837//ENST00000322536	ENST00000615849	2588	8	33	3	hsa-miR-4660,hsa-miR-4733-3p,hsa-miR-504-3p	0.000101357	0.0017149	29.4091
4:53425872|53444103//ENST00000306932	ENST00000470044	2588	25	14	3	hsa-miR-6779-5p,hsa-miR-6780a-5p,hsa-miR-765	0.000270408	0.0038023	22.1829
8:47407861|47440542//ENST00000297423	ENST00000470044	2588	22	14	4	hsa-miR-4739,hsa-miR-6779-5p,hsa-miR-6780a-5p,hsa-miR-765	3.71305e-06	0.000104613	33.6104
10:110100625|110112915//ENST00000497125	ENST00000470044	2588	9	14	3	hsa-miR-6779-5p,hsa-miR-6780a-5p,hsa-miR-765	1.03947e-05	0.00025329	61.619
3:65018441|65050822//XLOC.132426.15	ENST00000470044	2588	25	14	3	hsa-miR-3154,hsa-miR-4739,hsa-miR-765	0.000270408	0.0038023	22.1829
10:110100625|110112915//ENST00000277900	ENST00000470044	2588	10	14	3	hsa-miR-6779-5p,hsa-miR-6780a-5p,hsa-miR-765	1.48021e-05	0.000342558	55.4571
4:53425872|53444103//ENST00000358575	ENST00000470044	2588	26	14	3	hsa-miR-6779-5p,hsa-miR-6780a-5p,hsa-miR-765	0.000304701	0.00418428	21.3297
12:31701863|31709425//ENST00000281471	ENST00000470044	2588	7	14	2	hsa-miR-1273h-5p,hsa-miR-6780a-5p	0.000562087	0.0067979	52.8163
3:183033991|183041750//ENST00000497959	ENST00000318911	2588	11	22	3	hsa-miR-1915-5p,hsa-miR-4778-3p,hsa-miR-6856-5p	8.42491e-05	0.0014713	32.0826
15:90217439|90219891//ENST00000332496	ENST00000318911	2588	23	22	4	hsa-miR-1915-5p,hsa-miR-4656,hsa-miR-7150,hsa-miR-7160-5p	3.12332e-05	0.000644317	20.4585
6:80167678|80203212//ENST00000320393	ENST00000318911	2588	16	22	3	hsa-miR-4778-3p,hsa-miR-661,hsa-miR-6728-5p	0.000278146	0.00388996	22.0568
8:38788704|38820635//ENST00000317827	ENST00000550359	2588	62	5	3	hsa-miR-3652,hsa-miR-4697-3p,hsa-miR-6882-3p	0.000126617	0.00205759	25.0452
4:150588048|150599131//ENST00000507224	ENST00000229265	2588	15	17	3	hsa-miR-6762-5p,hsa-miR-6845-5p,hsa-miR-765	0.00010211	0.00172501	30.4471
7:140702866|140704963//ENST00000247866	ENST00000229265	2588	7	17	2	hsa-miR-204-3p,hsa-miR-4646-5p	0.000836792	0.00926133	43.4958
1:236032401|236038253//ENST00000264187	ENST00000229265	2588	19	17	3	hsa-miR-1227-5p,hsa-miR-6762-5p,hsa-miR-6845-5p	0.000213946	0.00314991	24.0372
4:150588048|150599131//ENST00000357115	ENST00000229265	2588	15	17	3	hsa-miR-6762-5p,hsa-miR-6845-5p,hsa-miR-765	0.00010211	0.00172501	30.4471
11:125602303|125604247//ENST00000392708	ENST00000229265	2588	23	17	4	hsa-miR-1911-3p,hsa-miR-6762-5p,hsa-miR-6845-5p,hsa-miR-765	1.04665e-05	0.000254784	26.4757
17:19958014|19958571//ENST00000225737	ENST00000229265	2588	22	17	3	hsa-miR-204-3p,hsa-miR-3153,hsa-miR-4646-5p	0.000335889	0.00452468	20.7594
10:119838535|119842595//ENST00000360003	ENST00000404752	2588	9	65	5	hsa-miR-3187-5p,hsa-miR-5189-5p,hsa-miR-612,hsa-miR-6860,hsa-miR-6874-3p	9.98709e-07	3.33105e-05	22.1197
12:22482557|22506819//ENST00000545552	ENST00000483687	2588	17	4	2	hsa-miR-6808-5p,hsa-miR-6893-5p	0.000241877	0.00347606	76.1176
12:22490123|22506819//ENST00000535555	ENST00000483687	2588	9	4	2	hsa-miR-6808-5p,hsa-miR-6893-5p	6.42916e-05	0.0011777	143.778
15:98891325|98899621//ENST00000268035	ENST00000483687	2588	26	4	2	hsa-miR-6808-5p,hsa-miR-6893-5p	0.000575327	0.00692807	49.7692
9:77794463|77922345//ENST00000286548	ENST00000483687	2588	20	4	2	hsa-miR-6808-5p,hsa-miR-6893-5p	0.000337392	0.00454099	64.7
13:19835477|19838985//ENST00000337963	ENST00000483687	2588	23	4	2	hsa-miR-6808-5p,hsa-miR-6893-5p	0.000448567	0.00569146	56.2609
1:237364358|237388183//ENST00000366574	ENST00000483687	2588	26	4	2	hsa-miR-6808-5p,hsa-miR-6893-5p	0.000575327	0.00692807	49.7692
3:125313308|125315053//ENST00000485866	ENST00000483687	2588	28	4	2	hsa-miR-6808-5p,hsa-miR-6893-5p	0.000668455	0.00778018	46.2143
13:101283933|101292366//ENST00000251127	ENST00000483687	2588	20	4	2	hsa-miR-6808-5p,hsa-miR-6893-5p	0.000337392	0.00454099	64.7
17:50736960|50741731//ENST00000507200	ENST00000641905	2588	17	53	10	hsa-miR-518d-5p,hsa-miR-518e-5p,hsa-miR-518f-5p,hsa-miR-519a-5p,hsa-miR-519b-5p,hsa-miR-519c-5p,hsa-miR-520c-5p,hsa-miR-522-5p,hsa-miR-523-5p,hsa-miR-526a	9.33444e-14	1.43997e-11	28.7236
1:100913663|100921841//ENST00000357650	ENST00000369285	2588	12	15	4	hsa-miR-298,hsa-miR-550a-3-5p,hsa-miR-550a-5p,hsa-miR-550b-2-5p	3.52565e-07	1.33185e-05	57.5111
2:86108350|86119044//ENST00000254630	ENST00000369285	2588	7	15	2	hsa-miR-550a-3-5p,hsa-miR-550a-5p	0.000647724	0.00759015	49.2952
1:100906852|100921841//ENST00000357650	ENST00000369285	2588	22	15	4	hsa-miR-298,hsa-miR-550a-3-5p,hsa-miR-550a-5p,hsa-miR-550b-2-5p	5.03501e-06	0.00013602	31.3697
3:183033991|183041750//ENST00000265594	ENST00000369285	2588	21	15	3	hsa-miR-550a-3-5p,hsa-miR-550a-5p,hsa-miR-550b-2-5p	0.000196944	0.00294733	24.6476
18:13681605|13682105//ENST00000322247	ENST00000397722	2588	12	49	5	hsa-miR-4651,hsa-miR-5189-5p,hsa-miR-5572,hsa-miR-6812-5p,hsa-miR-6819-5p	1.41787e-06	4.52421e-05	22.0068
15:64817946|64819223//ENST00000268043	ENST00000409366	2588	35	18	5	hsa-miR-1972,hsa-miR-3135b,hsa-miR-3139,hsa-miR-4487,hsa-miR-5088-3p	2.54322e-06	7.53042e-05	20.5397
1:219179147|219211752//ENST00000366928	ENST00000580844	2588	12	15	3	hsa-miR-3192-5p,hsa-miR-6779-5p,hsa-miR-6780a-5p	3.36171e-05	0.00068507	43.1333
6:158448996|158452268//ENST00000367094	ENST00000580844	2588	19	15	3	hsa-miR-4728-5p,hsa-miR-6785-5p,hsa-miR-6883-5p	0.000144494	0.00229133	27.2421
1:219179147|219211752//ENST00000474379	ENST00000580844	2588	10	15	3	hsa-miR-3192-5p,hsa-miR-6779-5p,hsa-miR-6780a-5p	1.8465e-05	0.000413424	51.76
1:219179147|219211752//ENST00000477938	ENST00000580844	2588	10	15	3	hsa-miR-3192-5p,hsa-miR-6779-5p,hsa-miR-6780a-5p	1.8465e-05	0.000413424	51.76
8:47407861|47440542//ENST00000297423	ENST00000580844	2588	22	15	5	hsa-miR-138-5p,hsa-miR-4728-5p,hsa-miR-6779-5p,hsa-miR-6780a-5p,hsa-miR-6883-5p	7.76618e-08	3.47687e-06	39.2121
10:110100625|110112915//ENST00000497125	ENST00000580844	2588	9	15	3	hsa-miR-3192-5p,hsa-miR-6779-5p,hsa-miR-6780a-5p	1.29707e-05	0.00030598	57.5111
3:4410865|4420146//ENST00000272902	ENST00000580844	2588	26	15	4	hsa-miR-4728-5p,hsa-miR-6780a-5p,hsa-miR-6785-5p,hsa-miR-6883-5p	1.01503e-05	0.000248213	26.5436
7:130170400|130181719//ENST00000397622	ENST00000580844	2588	23	15	3	hsa-miR-4685-5p,hsa-miR-4728-5p,hsa-miR-6883-5p	0.000260421	0.00368901	22.5043
17:82563354|82571870//ENST00000527313	ENST00000580844	2588	34	15	5	hsa-miR-4446-3p,hsa-miR-4656,hsa-miR-4728-5p,hsa-miR-6785-5p,hsa-miR-6883-5p	7.8923e-07	2.70968e-05	25.3725
1:219179147|219211752//ENST00000463964	ENST00000580844	2588	12	15	3	hsa-miR-3192-5p,hsa-miR-6779-5p,hsa-miR-6780a-5p	3.36171e-05	0.00068507	43.1333
8:30680904|30700135//ENST00000541648	ENST00000580844	2588	29	15	4	hsa-miR-3192-5p,hsa-miR-4446-3p,hsa-miR-4656,hsa-miR-4685-5p	1.59609e-05	0.000365351	23.7977
10:110100625|110112915//ENST00000277900	ENST00000580844	2588	10	15	3	hsa-miR-3192-5p,hsa-miR-6779-5p,hsa-miR-6780a-5p	1.8465e-05	0.000413424	51.76
8:30680904|30700135//ENST00000537535	ENST00000580844	2588	23	15	3	hsa-miR-4446-3p,hsa-miR-4656,hsa-miR-4685-5p	0.000260421	0.00368901	22.5043
13:95177707|95188542//ENST00000376887	ENST00000580844	2588	15	15	3	hsa-miR-128-2-5p,hsa-miR-4446-3p,hsa-miR-4685-5p	6.8802e-05	0.0012454	34.5067
7:130173632|130178527//ENST00000397622	ENST00000580844	2588	20	15	3	hsa-miR-4685-5p,hsa-miR-4728-5p,hsa-miR-6883-5p	0.0001694	0.00261006	25.88
1:219179147|219211752//ENST00000460522	ENST00000580844	2588	10	15	3	hsa-miR-3192-5p,hsa-miR-6779-5p,hsa-miR-6780a-5p	1.8465e-05	0.000413424	51.76
X:16667514|16691620//ENST00000359276	ENST00000580844	2588	19	15	3	hsa-miR-4446-3p,hsa-miR-4656,hsa-miR-4685-5p	0.000144494	0.00229133	27.2421
2:160313156|160367391//ENST00000348849	ENST00000580844	2588	37	15	5	hsa-miR-3192-5p,hsa-miR-4446-3p,hsa-miR-6779-5p,hsa-miR-6785-5p,hsa-miR-6883-5p	1.22434e-06	3.97647e-05	23.3153
1:219179147|219211752//ENST00000366927	ENST00000580844	2588	12	15	3	hsa-miR-3192-5p,hsa-miR-6779-5p,hsa-miR-6780a-5p	3.36171e-05	0.00068507	43.1333
11:9989497|10002689//ENST00000256190	ENST00000580844	2588	37	15	7	hsa-miR-3192-5p,hsa-miR-4685-5p,hsa-miR-4728-5p,hsa-miR-6779-5p,hsa-miR-6780a-5p,hsa-miR-6785-5p,hsa-miR-6883-5p	3.98899e-10	3.02258e-08	32.6414
11:128758115|128768272//ENST00000527767	ENST00000580844	2588	21	15	3	hsa-miR-6779-5p,hsa-miR-6785-5p,hsa-miR-6883-5p	0.000196944	0.00294733	24.6476
9:137564434|137565154//ENST00000479650	ENST00000580844	2588	32	15	4	hsa-miR-138-5p,hsa-miR-4446-3p,hsa-miR-6785-5p,hsa-miR-6883-5p	2.39183e-05	0.000514373	21.5667
5:34922217|34923234//ENST00000336767	ENST00000580844	2588	5	15	2	hsa-miR-128-2-5p,hsa-miR-6510-5p	0.000310517	0.00424925	69.0133
8:30680904|30700135//ENST00000546342	ENST00000389167	2588	29	13	3	hsa-miR-4651,hsa-miR-6752-5p,hsa-miR-7110-5p	0.00033577	0.00452454	20.5942
11:126017088|126021520//ENST00000263577	ENST00000389167	2588	19	13	3	hsa-miR-6756-5p,hsa-miR-6812-5p,hsa-miR-6819-5p	9.16737e-05	0.00157903	31.4332
21:37420299|37496258//ENST00000339659	ENST00000389167	2588	49	13	5	hsa-miR-4651,hsa-miR-6756-5p,hsa-miR-6812-5p,hsa-miR-6819-5p,hsa-miR-6890-5p	2.27135e-06	6.82635e-05	20.314
8:30680904|30700135//ENST00000541648	ENST00000389167	2588	29	13	3	hsa-miR-4651,hsa-miR-6752-5p,hsa-miR-7110-5p	0.00033577	0.00452454	20.5942
8:30680904|30700135//ENST00000537535	ENST00000389167	2588	23	13	3	hsa-miR-4651,hsa-miR-6752-5p,hsa-miR-7110-5p	0.000165608	0.00256121	25.9666
2:160313156|160367391//ENST00000348849	ENST00000389167	2588	37	13	5	hsa-miR-4651,hsa-miR-6756-5p,hsa-miR-6812-5p,hsa-miR-6819-5p,hsa-miR-6890-5p	5.35725e-07	1.92722e-05	26.9023
18:13681605|13682105//ENST00000322247	ENST00000389167	2588	12	13	3	hsa-miR-4651,hsa-miR-6812-5p,hsa-miR-6819-5p	2.12417e-05	0.000465477	49.7692
5:84060300|84066606//ENST00000296591	ENST00000389167	2588	24	13	3	hsa-miR-6747-5p,hsa-miR-6752-5p,hsa-miR-7110-5p	0.000188716	0.00284741	24.8846
5:168683966|168685927//ENST00000518092	ENST00000389167	2588	23	13	5	hsa-miR-4447,hsa-miR-4472,hsa-miR-6747-5p,hsa-miR-6752-5p,hsa-miR-7110-5p	4.28887e-08	2.04774e-06	43.2776
5:168683966|168685927//ENST00000332966	ENST00000389167	2588	29	13	5	hsa-miR-4447,hsa-miR-4472,hsa-miR-6747-5p,hsa-miR-6752-5p,hsa-miR-7110-5p	1.49023e-07	6.21045e-06	34.3236
21:37420299|37496258//ENST00000338785	ENST00000389167	2588	49	13	5	hsa-miR-4651,hsa-miR-6756-5p,hsa-miR-6812-5p,hsa-miR-6819-5p,hsa-miR-6890-5p	2.27135e-06	6.82635e-05	20.314
2:241407537|241431774//ENST00000264042	ENST00000433423	2588	17	20	3	hsa-miR-2682-5p,hsa-miR-34a-5p,hsa-miR-449c-5p	0.000250679	0.00357646	22.8353
10:119838535|119842595//ENST00000360003	ENST00000433423	2588	9	20	3	hsa-miR-3187-5p,hsa-miR-612,hsa-miR-6874-3p	3.22153e-05	0.00066103	43.1333
1:168231514|168236770//ENST00000367829	ENST00000433423	2588	16	20	4	hsa-miR-1910-3p,hsa-miR-3187-5p,hsa-miR-6511a-5p,hsa-miR-939-3p	4.45482e-06	0.000122386	32.35
1:168231514|168236770//ENST00000271375	ENST00000433423	2588	19	20	4	hsa-miR-1910-3p,hsa-miR-3187-5p,hsa-miR-6511a-5p,hsa-miR-939-3p	9.34681e-06	0.000231176	27.2421
15:49235851|49239367//ENST00000327171	ENST00000433423	2588	4	20	2	hsa-miR-2682-5p,hsa-miR-449c-5p	0.000337392	0.00454099	64.7
1:219179147|219211752//ENST00000366928	ENST00000342795	2588	12	23	3	hsa-miR-3187-5p,hsa-miR-6779-5p,hsa-miR-6860	0.000128134	0.00207726	28.1304
8:86494829|86507112//ENST00000522804	ENST00000342795	2588	29	23	6	hsa-miR-3187-5p,hsa-miR-3929,hsa-miR-4478,hsa-miR-6134,hsa-miR-6779-5p,hsa-miR-6884-5p	1.01439e-07	4.41151e-06	23.2804
1:219179147|219211752//ENST00000463964	ENST00000342795	2588	12	23	3	hsa-miR-3187-5p,hsa-miR-6779-5p,hsa-miR-6860	0.000128134	0.00207726	28.1304
21:37108392|37148647//ENST00000481605	ENST00000342795	2588	22	23	4	hsa-miR-185-5p,hsa-miR-4306,hsa-miR-4478,hsa-miR-6884-5p	3.12332e-05	0.000644317	20.4585
1:219179147|219211752//ENST00000366927	ENST00000342795	2588	12	23	3	hsa-miR-3187-5p,hsa-miR-6779-5p,hsa-miR-6860	0.000128134	0.00207726	28.1304
13:45411362|45411938//ENST00000310862	ENST00000342795	2588	9	23	3	hsa-miR-3187-5p,hsa-miR-6849-3p,hsa-miR-6860	4.9785e-05	0.000952611	37.5072
6:158448996|158452268//ENST00000367094	ENST00000544916	2588	19	23	4	hsa-miR-149-3p,hsa-miR-4728-5p,hsa-miR-6785-5p,hsa-miR-6883-5p	1.68454e-05	0.000382343	23.6888
8:47407861|47440542//ENST00000297423	ENST00000544916	2588	22	23	5	hsa-miR-149-3p,hsa-miR-4728-5p,hsa-miR-6779-5p,hsa-miR-6780a-5p,hsa-miR-6883-5p	8.32668e-07	2.83959e-05	25.5731
10:110100625|110112915//ENST00000497125	ENST00000544916	2588	9	23	3	hsa-miR-6779-5p,hsa-miR-6780a-5p,hsa-miR-7106-5p	4.9785e-05	0.000952611	37.5072
3:4410865|4420146//ENST00000272902	ENST00000544916	2588	26	23	6	hsa-miR-149-3p,hsa-miR-4728-5p,hsa-miR-584-3p,hsa-miR-6780a-5p,hsa-miR-6785-5p,hsa-miR-6883-5p	5.00105e-08	2.34815e-06	25.9666
10:110100625|110112915//ENST00000277900	ENST00000544916	2588	10	23	3	hsa-miR-6779-5p,hsa-miR-6780a-5p,hsa-miR-7106-5p	7.07089e-05	0.00127328	33.7565
11:128758115|128768272//ENST00000527767	ENST00000544916	2588	21	23	4	hsa-miR-6779-5p,hsa-miR-6785-5p,hsa-miR-6883-5p,hsa-miR-7106-5p	2.57058e-05	0.000546569	21.4327
3:105670233|105685466//ENST00000394030	ENST00000544916	2588	33	23	6	hsa-miR-4728-5p,hsa-miR-5698,hsa-miR-6785-5p,hsa-miR-6883-5p,hsa-miR-7111-5p,hsa-miR-942-5p	2.31194e-07	9.16664e-06	20.4585
6:73466209|73466606//ENST00000370300	ENST00000439705	2588	11	25	3	hsa-miR-199a-5p,hsa-miR-199b-5p,hsa-miR-6736-3p	0.00012495	0.00203542	28.2327
3:65018441|65050822//XLOC.132426.1	ENST00000439705	2588	12	25	3	hsa-miR-298,hsa-miR-3173-5p,hsa-miR-6779-3p	0.000165537	0.00256055	25.88
16:11774236|11782388//ENST00000355758	ENST00000524564	2588	20	18	3	hsa-miR-509-3-5p,hsa-miR-509-5p,hsa-miR-943	0.000299331	0.00412563	21.5667
4:147939825|148023413//ENST00000336498	ENST00000554736	2588	33	9	3	hsa-miR-2467-5p,hsa-miR-597-3p,hsa-miR-6837-3p	0.000150713	0.00237244	26.1414
7:6814764|6824737//ENST00000411858	ENST00000371459	2588	8	41	3	hsa-miR-4739,hsa-miR-6124,hsa-miR-6851-5p	0.000195729	0.0029334	23.6707
2:201565729|201575326//ENST00000286195	ENST00000371459	2588	6	41	3	hsa-miR-4700-5p,hsa-miR-6851-5p,hsa-miR-8089	7.14679e-05	0.00128427	31.561
2:9318524|9327911//ENST00000281419	ENST00000371459	2588	8	41	3	hsa-miR-3127-3p,hsa-miR-4747-5p,hsa-miR-5196-5p	0.000195729	0.0029334	23.6707
9:96827080|96852005//ENST00000466833	ENST00000602723	2588	6	19	3	hsa-miR-3925-5p,hsa-miR-6731-5p,hsa-miR-8085	6.62298e-06	0.000172328	68.1053
9:96827080|96852005//ENST00000478850	ENST00000602723	2588	11	19	3	hsa-miR-3925-5p,hsa-miR-6731-5p,hsa-miR-8085	5.33831e-05	0.00100921	37.1483
5:65579424|65583219//ENST00000261308	ENST00000602723	2588	4	19	2	hsa-miR-183-5p,hsa-miR-4793-3p	0.00030381	0.00417402	68.1053
4:39898389|39904191//ENST00000303538	ENST00000397375	2588	9	32	3	hsa-miR-1275,hsa-miR-4665-5p,hsa-miR-6796-5p	0.000137252	0.00219788	26.9583
3:57890041|57909150//ENST00000295951	ENST00000559004	2588	7	11	2	hsa-miR-378g,hsa-miR-6783-3p	0.000341041	0.00458098	67.2208
1:35405023|35405468//ENST00000314607	ENST00000559004	2588	13	11	4	hsa-miR-1343-3p,hsa-miR-378g,hsa-miR-6783-3p,hsa-miR-939-3p	1.24078e-07	5.27718e-06	72.3916
3:57890041|57909150//ENST00000459654	ENST00000559004	2588	7	11	2	hsa-miR-378g,hsa-miR-6783-3p	0.000341041	0.00458098	67.2208
2:48328561|48346751//ENST00000340553	ENST00000559004	2588	19	11	3	hsa-miR-1343-3p,hsa-miR-6783-3p,hsa-miR-8073	5.33831e-05	0.00100921	37.1483
1:168231514|168236770//ENST00000367829	ENST00000559004	2588	16	11	3	hsa-miR-1343-3p,hsa-miR-6783-3p,hsa-miR-939-3p	3.10672e-05	0.000641445	44.1136
1:35405023|35408159//ENST00000314607	ENST00000559004	2588	17	11	4	hsa-miR-1343-3p,hsa-miR-378g,hsa-miR-6783-3p,hsa-miR-939-3p	4.09436e-07	1.51944e-05	55.3583
1:168231514|168236770//ENST00000271375	ENST00000559004	2588	19	11	3	hsa-miR-1343-3p,hsa-miR-6783-3p,hsa-miR-939-3p	5.33831e-05	0.00100921	37.1483
18:56717964|56758953//ENST00000254442	ENST00000611110	2588	41	3	2	hsa-miR-6737-5p,hsa-miR-6819-5p	0.000727471	0.00831216	42.0813
10:124681607|124706887//ENST00000280780	ENST00000611110	2588	80	3	3	hsa-miR-6737-5p,hsa-miR-6812-5p,hsa-miR-6819-5p	2.84723e-05	0.000595662	32.35
11:47358844|47375729//ENST00000227163	ENST00000611110	2588	57	3	3	hsa-miR-6737-5p,hsa-miR-6812-5p,hsa-miR-6819-5p	1.014e-05	0.000247999	45.4035
4:2662838|2672372//ENST00000324666	ENST00000611110	2588	43	3	2	hsa-miR-6812-5p,hsa-miR-6819-5p	0.000800688	0.00895293	40.124
3:160521779|160528039//ENST00000334256	ENST00000611110	2588	18	3	2	hsa-miR-6812-5p,hsa-miR-6819-5p	0.000136548	0.00218914	95.8519
4:94573351|94586444//ENST00000317968	ENST00000611110	2588	39	3	2	hsa-miR-6812-5p,hsa-miR-6819-5p	0.000657728	0.00768219	44.2393
17:32171043|32183272//ENST00000578205	ENST00000611110	2588	16	3	2	hsa-miR-6737-5p,hsa-miR-6812-5p	0.000107152	0.00179479	107.833
17:32171043|32183272//ENST00000333942	ENST00000611110	2588	15	3	2	hsa-miR-6737-5p,hsa-miR-6812-5p	9.37825e-05	0.00160889	115.022
9:122989297|122990213//ENST00000373647	ENST00000611110	2588	9	3	2	hsa-miR-6737-5p,hsa-miR-6812-5p	3.22039e-05	0.000660867	191.704
9:85822880|85830576//ENST00000431724	ENST00000611110	2588	47	3	3	hsa-miR-6737-5p,hsa-miR-6812-5p,hsa-miR-6819-5p	5.61926e-06	0.000149537	55.0638
11:126017088|126021520//ENST00000263577	ENST00000611110	2588	19	3	2	hsa-miR-6812-5p,hsa-miR-6819-5p	0.000152574	0.00239659	90.807
16:68121987|68158068//ENST00000329524	ENST00000611110	2588	77	3	3	hsa-miR-6737-5p,hsa-miR-6812-5p,hsa-miR-6819-5p	2.53499e-05	0.00054018	33.6104
1:168104477|168104894//ENST00000271357	ENST00000611110	2588	52	3	3	hsa-miR-6737-5p,hsa-miR-6812-5p,hsa-miR-6819-5p	7.65869e-06	0.000195103	49.7692
1:64671564|64675983//ENST00000290039	ENST00000611110	2588	44	3	2	hsa-miR-6737-5p,hsa-miR-6812-5p	0.000838598	0.0092768	39.2121
16:68121987|68126610//ENST00000329524	ENST00000611110	2588	71	3	3	hsa-miR-6737-5p,hsa-miR-6812-5p,hsa-miR-6819-5p	1.98069e-05	0.000438896	36.4507
4:88475841|88494331//ENST00000264350	ENST00000611110	2588	17	3	2	hsa-miR-6812-5p,hsa-miR-6819-5p	0.000121408	0.00198857	101.49
18:56758865|56781656//ENST00000357574	ENST00000611110	2588	21	3	2	hsa-miR-6737-5p,hsa-miR-6819-5p	0.000187274	0.00282954	82.1587
2:160313156|160367391//ENST00000348849	ENST00000611110	2588	37	3	3	hsa-miR-6737-5p,hsa-miR-6812-5p,hsa-miR-6819-5p	2.69267e-06	7.91077e-05	69.9459
18:13681605|13682105//ENST00000322247	ENST00000611110	2588	12	3	2	hsa-miR-6812-5p,hsa-miR-6819-5p	5.89948e-05	0.00109686	143.778
18:56758865|56781656//ENST00000254442	ENST00000611110	2588	27	3	2	hsa-miR-6737-5p,hsa-miR-6819-5p	0.000312528	0.00427227	63.9012
1:12275825|12278038//ENST00000613099	ENST00000611110	2588	57	3	3	hsa-miR-6737-5p,hsa-miR-6812-5p,hsa-miR-6819-5p	1.014e-05	0.000247999	45.4035
9:122989297|122990213//ENST00000317419	ENST00000611110	2588	15	3	2	hsa-miR-6737-5p,hsa-miR-6812-5p	9.37825e-05	0.00160889	115.022
9:126381064|126395697//ENST00000361171	ENST00000611110	2588	35	3	3	hsa-miR-6737-5p,hsa-miR-6812-5p,hsa-miR-6819-5p	2.26815e-06	6.81775e-05	73.9429
1:70292388|70306290//ENST00000262346	ENST00000530617	2588	8	43	3	hsa-miR-1231,hsa-miR-3187-5p,hsa-miR-6511a-5p	0.000225931	0.00329042	22.5698
2:201565729|201575326//ENST00000286195	ENST00000381568	2588	6	85	4	hsa-miR-1306-5p,hsa-miR-4700-5p,hsa-miR-6851-5p,hsa-miR-8089	1.54803e-05	0.000356017	20.298
10:49474027|49500696//ENST00000623115	ENST00000487179	2588	29	4	2	hsa-miR-146a-5p,hsa-miR-146b-5p	0.000717598	0.00822446	44.6207
17:78392476|78398351//ENST00000589426	ENST00000487179	2588	28	4	2	hsa-miR-146a-5p,hsa-miR-146b-5p	0.000668455	0.00778018	46.2143
17:78392476|78398351//ENST00000262764	ENST00000487179	2588	32	4	2	hsa-miR-146a-5p,hsa-miR-146b-5p	0.000875308	0.00959204	40.4375
6:149597063|149598350//ENST00000335647	ENST00000591200	2588	9	15	3	hsa-miR-6736-3p,hsa-miR-6749-3p,hsa-miR-7113-3p	1.29707e-05	0.00030598	57.5111
1:7835762|7837149//ENST00000361923	ENST00000591200	2588	8	15	2	hsa-miR-4268,hsa-miR-6736-3p	0.00086074	0.00946676	43.1333
9:77794463|77922345//ENST00000286548	ENST00000398881	2588	20	16	3	hsa-miR-1207-5p,hsa-miR-6808-5p,hsa-miR-6893-5p	0.000207464	0.00307366	24.2625
8:86494829|86507112//ENST00000522804	ENST00000371060	2588	29	30	7	hsa-miR-320a,hsa-miR-320b,hsa-miR-320c,hsa-miR-320d,hsa-miR-3929,hsa-miR-4429,hsa-miR-5189-5p	1.74711e-08	9.17583e-07	20.823
4:94573351|94586444//ENST00000437932	ENST00000371060	2588	11	30	3	hsa-miR-4682,hsa-miR-4758-5p,hsa-miR-5189-5p	0.000218006	0.00319787	23.5273
4:94573351|94586444//ENST00000318007	ENST00000371060	2588	10	30	3	hsa-miR-4682,hsa-miR-4758-5p,hsa-miR-5189-5p	0.0001598	0.00248882	25.88
3:17372075|17384015//ENST00000253692	ENST00000537445	2588	15	8	2	hsa-miR-1266-5p,hsa-miR-3127-3p	0.00086074	0.00946676	43.1333
4:2954424|2956811//ENST00000314262	ENST00000537445	2588	9	8	2	hsa-miR-4268,hsa-miR-4691-5p	0.000297867	0.00410959	71.8889
15:57451500|57461892//ENST00000281282	ENST00000537445	2588	37	8	3	hsa-miR-1266-5p,hsa-miR-4518,hsa-miR-4691-5p	0.000143503	0.00227902	26.2297
11:128758115|128768272//ENST00000281428	ENST00000537445	2588	48	8	3	hsa-miR-1266-5p,hsa-miR-4518,hsa-miR-4691-5p	0.000314334	0.00429165	20.2188
15:64817946|64819223//ENST00000268043	ENST00000537445	2588	35	8	3	hsa-miR-1266-5p,hsa-miR-4276,hsa-miR-4518	0.000121232	0.00198653	27.7286
3:44629065|44631221//ENST00000383745	ENST00000537445	2588	46	8	3	hsa-miR-1266-5p,hsa-miR-3127-3p,hsa-miR-4268	0.000276688	0.00387416	21.0978
12:68816812|68824651//ENST00000258149	ENST00000422563	2588	11	27	3	hsa-miR-1271-5p,hsa-miR-3074-5p,hsa-miR-532-3p	0.000158164	0.00246781	26.1414
5:74813840|74841679//ENST00000510609	ENST00000358524	2588	11	37	4	hsa-miR-106a-5p,hsa-miR-17-5p,hsa-miR-20a-5p,hsa-miR-20b-5p	1.08769e-05	0.000263397	25.4349
5:74834426|74841679//ENST00000389156	ENST00000358524	2588	12	37	4	hsa-miR-106a-5p,hsa-miR-17-5p,hsa-miR-20a-5p,hsa-miR-20b-5p	1.61488e-05	0.000368937	23.3153
5:113082860|113085310//ENST00000302475	ENST00000622786	2588	26	8	3	hsa-miR-1238-5p,hsa-miR-4758-5p,hsa-miR-6855-5p	4.87965e-05	0.000936519	37.3269
12:32581960|32602317//ENST00000395740	ENST00000622786	2588	45	8	3	hsa-miR-4731-3p,hsa-miR-6852-5p,hsa-miR-6855-5p	0.000259022	0.00367347	21.5667
12:32581960|32602317//ENST00000427716	ENST00000622786	2588	41	8	3	hsa-miR-4731-3p,hsa-miR-6852-5p,hsa-miR-6855-5p	0.000195729	0.0029334	23.6707
X:154789954|154792285//ENST00000369534	ENST00000262675	2588	16	32	4	hsa-miR-1207-5p,hsa-miR-4763-3p,hsa-miR-6721-5p,hsa-miR-6836-5p	3.16147e-05	0.000650875	20.2188
6:42650284|42652645//ENST00000372899	ENST00000262675	2588	11	32	3	hsa-miR-4632-5p,hsa-miR-6735-5p,hsa-miR-6879-5p	0.000265093	0.00374343	22.0568
11:61271675|61274584//ENST00000301770	ENST00000262675	2588	32	32	8	hsa-miR-1207-5p,hsa-miR-4267,hsa-miR-4436b-3p,hsa-miR-4632-5p,hsa-miR-4763-3p,hsa-miR-6721-5p,hsa-miR-6735-5p,hsa-miR-6879-5p	1.8349e-09	1.20318e-07	20.2188
3:72832369|72844423//ENST00000325599	ENST00000262675	2588	10	32	3	hsa-miR-4267,hsa-miR-6721-5p,hsa-miR-6722-3p	0.000194428	0.00291828	24.2625
22:24302195|24313466//ENST00000314328	ENST00000262675	2588	17	32	5	hsa-miR-1207-5p,hsa-miR-1909-3p,hsa-miR-4763-3p,hsa-miR-6721-5p,hsa-miR-6722-3p	1.16408e-06	3.80508e-05	23.7868
2:205440370|205440672//ENST00000351153	ENST00000262675	2588	12	32	3	hsa-miR-4267,hsa-miR-6794-5p,hsa-miR-6870-5p	0.000350489	0.00468078	20.2188
6:17507169|17513954//ENST00000229922	ENST00000262675	2588	12	32	5	hsa-miR-1207-5p,hsa-miR-4632-5p,hsa-miR-4763-3p,hsa-miR-6721-5p,hsa-miR-6879-5p	1.55657e-07	6.45366e-06	33.6979
1:219179147|219211752//ENST00000474379	ENST00000372956	2588	10	33	3	hsa-miR-30b-3p,hsa-miR-3192-5p,hsa-miR-6780a-5p	0.000213434	0.0031446	23.5273
1:219179147|219211752//ENST00000477938	ENST00000372956	2588	10	33	3	hsa-miR-30b-3p,hsa-miR-3192-5p,hsa-miR-6780a-5p	0.000213434	0.0031446	23.5273
8:25332251|25336373//ENST00000276440	ENST00000372956	2588	7	33	3	hsa-miR-3135b,hsa-miR-3192-5p,hsa-miR-4465	6.39034e-05	0.00117166	33.6104
10:110100625|110112915//ENST00000497125	ENST00000372956	2588	9	33	3	hsa-miR-30b-3p,hsa-miR-3192-5p,hsa-miR-6780a-5p	0.000150713	0.00237244	26.1414
10:110100625|110112915//ENST00000277900	ENST00000372956	2588	10	33	3	hsa-miR-30b-3p,hsa-miR-3192-5p,hsa-miR-6780a-5p	0.000213434	0.0031446	23.5273
1:219179147|219211752//ENST00000460522	ENST00000372956	2588	10	33	3	hsa-miR-30b-3p,hsa-miR-3192-5p,hsa-miR-6780a-5p	0.000213434	0.0031446	23.5273
9:105721537|105748190//ENST00000374688	ENST00000641607	2588	15	29	4	hsa-miR-1263,hsa-miR-3927-3p,hsa-miR-6791-5p,hsa-miR-6831-5p	1.59609e-05	0.000365351	23.7977
6:17507169|17513954//ENST00000229922	ENST00000641607	2588	12	29	3	hsa-miR-4632-5p,hsa-miR-5004-3p,hsa-miR-6879-5p	0.000260244	0.0036871	22.3103
10:119838535|119842595//ENST00000360003	ENST00000461509	2588	9	62	5	hsa-miR-3135b,hsa-miR-3187-5p,hsa-miR-5189-5p,hsa-miR-612,hsa-miR-6860	7.85503e-07	2.69835e-05	23.19
9:75932379|75986245//ENST00000376752	ENST00000461509	2588	6	62	3	hsa-miR-5189-5p,hsa-miR-612,hsa-miR-6860	0.000248907	0.00355685	20.871
1:64629355|64634260//ENST00000495994	ENST00000461509	2588	8	62	4	hsa-miR-1229-5p,hsa-miR-3652,hsa-miR-4430,hsa-miR-6861-5p	1.94768e-05	0.000432682	20.871
16:29905788|29906127//ENST00000566693	ENST00000309366	2588	23	6	3	hsa-miR-1913,hsa-miR-6752-3p,hsa-miR-6801-3p	1.20623e-05	0.000287744	56.2609
1:35405023|35405468//ENST00000314607	ENST00000309366	2588	13	6	2	hsa-miR-6801-3p,hsa-miR-6810-3p	0.000345559	0.0046293	66.359
1:35966955|35973511//ENST00000324350	ENST00000309366	2588	16	6	2	hsa-miR-1913,hsa-miR-6752-3p	0.000529983	0.00649161	53.9167
19:12679457|12680325//ENST00000598850	ENST00000309366	2588	40	6	4	hsa-miR-6752-3p,hsa-miR-6801-3p,hsa-miR-6810-3p,hsa-miR-7152-3p	7.18815e-07	2.49545e-05	43.1333
1:35405023|35408159//ENST00000314607	ENST00000309366	2588	17	6	2	hsa-miR-6801-3p,hsa-miR-6810-3p	0.000600027	0.00715399	50.7451
1:236808704|236816543//ENST00000366577	ENST00000309366	2588	17	6	2	hsa-miR-6752-3p,hsa-miR-6801-3p	0.000600027	0.00715399	50.7451
6:130175841|130184623//ENST00000368134	ENST00000537763	2588	19	4	2	hsa-miR-6741-5p,hsa-miR-7155-5p	0.00030381	0.00417402	68.1053
2:200597397|200605628//ENST00000374700	ENST00000398793	2588	15	8	2	hsa-miR-6736-5p,hsa-miR-6776-5p	0.00086074	0.00946676	43.1333
1:168104477|168104894//ENST00000271357	ENST00000398793	2588	52	8	5	hsa-miR-4419a,hsa-miR-4701-3p,hsa-miR-4710,hsa-miR-6133,hsa-miR-7106-5p	1.44252e-07	6.03273e-06	31.1058
6:111177212|111177665//ENST00000612036	ENST00000398793	2588	15	8	2	hsa-miR-4419a,hsa-miR-6133	0.00086074	0.00946676	43.1333
6:136147351|136155758//ENST00000308191	ENST00000398793	2588	19	8	3	hsa-miR-4701-3p,hsa-miR-6736-5p,hsa-miR-6776-5p	1.83726e-05	0.000411657	51.0789
4:102906536|102912129//ENST00000503584	ENST00000398793	2588	21	8	5	hsa-miR-4419a,hsa-miR-4701-3p,hsa-miR-6133,hsa-miR-6776-5p,hsa-miR-7106-5p	1.1642e-09	7.97741e-08	77.0238
17:16098367|16101805//ENST00000395848	ENST00000398793	2588	39	8	3	hsa-miR-4419a,hsa-miR-6133,hsa-miR-6776-5p	0.000168293	0.00259577	24.8846
6:111177212|111177665//ENST00000368850	ENST00000398793	2588	15	8	2	hsa-miR-4419a,hsa-miR-6133	0.00086074	0.00946676	43.1333
4:3186597|3189093//ENST00000355072	ENST00000398793	2588	17	8	3	hsa-miR-4419a,hsa-miR-6133,hsa-miR-7106-5p	1.29306e-05	0.000305177	57.0882
18:24196125|24239382//ENST00000319481	ENST00000557575	2588	7	16	2	hsa-miR-185-5p,hsa-miR-4435	0.000739301	0.00841095	46.2143
12:31701863|31709425//ENST00000281471	ENST00000557575	2588	7	16	2	hsa-miR-4660,hsa-miR-4722-5p	0.000739301	0.00841095	46.2143
4:3186597|3189093//ENST00000355072	ENST00000557575	2588	17	16	3	hsa-miR-185-5p,hsa-miR-4435,hsa-miR-4644	0.000125163	0.00203767	28.5441
8:30680904|30700135//ENST00000537535	ENST00000395255	2588	23	15	3	hsa-miR-4651,hsa-miR-608,hsa-miR-6727-3p	0.000260421	0.00368901	22.5043
3:136443287|136477412//ENST00000236698	ENST00000513543	2588	10	35	3	hsa-miR-6826-3p,hsa-miR-6887-3p,hsa-miR-766-3p	0.00025499	0.00362802	22.1829
5:157359005|157361598//ENST00000435847	ENST00000216714	2588	29	4	2	hsa-miR-3155a,hsa-miR-3155b	0.000717598	0.00822446	44.6207
7:130026158|130049144//ENST00000311873	ENST00000216714	2588	29	4	2	hsa-miR-3155a,hsa-miR-3155b	0.000717598	0.00822446	44.6207
7:130026158|130049144//ENST00000471022	ENST00000216714	2588	24	4	2	hsa-miR-3155a,hsa-miR-3155b	0.000489092	0.00609344	53.9167
3:111112030|111126335//ENST00000319792	ENST00000216714	2588	13	4	2	hsa-miR-3155a,hsa-miR-3155b	0.000139011	0.00222093	99.5385
11:118754705|118758902//ENST00000526070	ENST00000216714	2588	17	4	2	hsa-miR-3155a,hsa-miR-3155b	0.000241877	0.00347606	76.1176
6:169762429|169769713//ENST00000366772	ENST00000216714	2588	10	4	2	hsa-miR-3155a,hsa-miR-3155b	8.0323e-05	0.0014153	129.4
6:169762429|169769713//ENST00000588451	ENST00000216714	2588	10	4	2	hsa-miR-3155a,hsa-miR-3155b	8.0323e-05	0.0014153	129.4
1:203720549|203722689//ENST00000341360	ENST00000216714	2588	31	4	2	hsa-miR-3155a,hsa-miR-3155b	0.000821027	0.00912983	41.7419
16:8801799|8806407//ENST00000568602	ENST00000216714	2588	12	4	2	hsa-miR-3155a,hsa-miR-3155b	0.000117685	0.00193816	107.833
6:16485972|16753347//ENST00000244769	ENST00000216714	2588	24	4	2	hsa-miR-3155a,hsa-miR-3155b	0.000489092	0.00609344	53.9167
5:138198199|138202155//ENST00000394886	ENST00000216714	2588	14	4	2	hsa-miR-3155a,hsa-miR-3155b	0.000162095	0.00251686	92.4286
17:19958014|19958571//ENST00000225737	ENST00000216714	2588	22	4	2	hsa-miR-3155a,hsa-miR-3155b	0.000409773	0.00529872	58.8182
11:18564892|18578808//ENST00000300038	ENST00000316316	2588	11	35	3	hsa-miR-4723-5p,hsa-miR-5698,hsa-miR-939-5p	0.000347364	0.00464854	20.1662
11:18564892|18578808//ENST00000320750	ENST00000316316	2588	9	35	3	hsa-miR-4723-5p,hsa-miR-5698,hsa-miR-939-5p	0.000180163	0.00274359	24.6476
6:13632370|13644729//ENST00000011619	ENST00000265968	2588	26	13	3	hsa-miR-4757-5p,hsa-miR-6744-3p,hsa-miR-6875-3p	0.000241014	0.00346688	22.9704
7:66771883|66775393//ENST00000284957	ENST00000265968	2588	23	13	3	hsa-miR-4757-5p,hsa-miR-6744-3p,hsa-miR-6875-3p	0.000165608	0.00256121	25.9666
10:110100625|110112915//ENST00000277900	ENST00000628272	2588	10	26	3	hsa-miR-4316,hsa-miR-6893-5p,hsa-miR-765	0.000103174	0.00173954	29.8615
6:42650284|42652645//ENST00000372899	ENST00000614895	2588	11	43	4	hsa-miR-4632-5p,hsa-miR-6735-5p,hsa-miR-6738-3p,hsa-miR-6879-5p	2.00594e-05	0.000443581	21.8858
9:122989297|122990213//ENST00000373647	ENST00000488558	2588	9	38	3	hsa-miR-2276-5p,hsa-miR-6737-5p,hsa-miR-6812-5p	0.000230997	0.00335066	22.7018
7:5919849|5923962//ENST00000325974	ENST00000507469	2588	9	41	3	hsa-miR-3170,hsa-miR-4731-5p,hsa-miR-6855-5p	0.000290363	0.00402644	21.0407
9:96827080|96852005//ENST00000466833	ENST00000367098	2588	6	14	2	hsa-miR-3150a-3p,hsa-miR-6763-5p	0.000402736	0.00522554	61.619
12:99772922|99812311//ENST00000329257	ENST00000367098	2588	23	14	3	hsa-miR-15b-5p,hsa-miR-497-5p,hsa-miR-6838-5p	0.000209552	0.00309826	24.1118
22:41338313|41339191//ENST00000352645	ENST00000367098	2588	33	14	4	hsa-miR-3150a-3p,hsa-miR-4667-5p,hsa-miR-6763-5p,hsa-miR-8089	2.00712e-05	0.000443785	22.4069
6:138945219|138947913//ENST00000258062	ENST00000367098	2588	27	14	3	hsa-miR-4667-5p,hsa-miR-4700-5p,hsa-miR-8089	0.000341692	0.00458744	20.5397
7:130026158|130049144//ENST00000471022	ENST00000367098	2588	24	14	3	hsa-miR-4700-5p,hsa-miR-6857-5p,hsa-miR-8089	0.000238722	0.00343951	23.1071
17:78392476|78398351//ENST00000589426	ENST00000367098	2588	28	14	4	hsa-miR-4667-5p,hsa-miR-4700-5p,hsa-miR-6763-5p,hsa-miR-8089	1.02007e-05	0.000249224	26.4082
15:22541995|22543138//ENST00000613386	ENST00000367098	2588	35	14	4	hsa-miR-3150a-3p,hsa-miR-4667-5p,hsa-miR-4700-5p,hsa-miR-6763-5p	2.55228e-05	0.000543198	21.1265
3:14443624|14447816//ENST00000622176	ENST00000367098	2588	44	14	5	hsa-miR-3150a-3p,hsa-miR-4667-5p,hsa-miR-4700-5p,hsa-miR-6763-5p,hsa-miR-8089	2.01304e-06	6.14296e-05	21.0065
2:58198579|58232112//ENST00000402135	ENST00000367098	2588	18	14	3	hsa-miR-4667-5p,hsa-miR-4700-5p,hsa-miR-8089	9.81106e-05	0.00166989	30.8095
2:172568741|172596023//ENST00000282077	ENST00000367098	2588	14	14	3	hsa-miR-1193,hsa-miR-4667-5p,hsa-miR-4700-5p	4.43289e-05	0.000863953	39.6122
2:201565729|201575326//ENST00000286195	ENST00000367098	2588	6	14	2	hsa-miR-4700-5p,hsa-miR-8089	0.000402736	0.00522554	61.619
12:99772922|99812311//ENST00000549866	ENST00000367098	2588	21	14	3	hsa-miR-15b-5p,hsa-miR-497-5p,hsa-miR-6838-5p	0.000158382	0.00247022	26.4082
12:41014228|41029219//ENST00000347616	ENST00000367098	2588	24	14	3	hsa-miR-4700-5p,hsa-miR-6857-5p,hsa-miR-8089	0.000238722	0.00343951	23.1071
17:78392476|78398351//ENST00000262764	ENST00000367098	2588	32	14	4	hsa-miR-4667-5p,hsa-miR-4700-5p,hsa-miR-6763-5p,hsa-miR-8089	1.76934e-05	0.000398471	23.1071
2:121503167|121530325//ENST00000263710	ENST00000367098	2588	22	14	4	hsa-miR-4667-5p,hsa-miR-4700-5p,hsa-miR-6857-5p,hsa-miR-8089	3.71305e-06	0.000104613	33.6104
12:22482557|22506819//ENST00000545552	ENST00000357086	2588	17	18	4	hsa-miR-1183,hsa-miR-3137,hsa-miR-665,hsa-miR-6877-3p	3.69075e-06	0.000104077	33.8301
12:22490123|22506819//ENST00000535555	ENST00000357086	2588	9	18	3	hsa-miR-1183,hsa-miR-3137,hsa-miR-665	2.31401e-05	0.000500372	47.9259
12:22490123|22506819//ENST00000333957	ENST00000357086	2588	7	18	3	hsa-miR-1183,hsa-miR-3137,hsa-miR-665	9.7262e-06	0.000239268	61.619
12:22482557|22506819//ENST00000333957	ENST00000357086	2588	15	18	4	hsa-miR-1183,hsa-miR-3137,hsa-miR-665,hsa-miR-6877-3p	2.13525e-06	6.47022e-05	38.3407
9:96827080|96852005//ENST00000466833	ENST00000428119	2588	6	44	3	hsa-miR-3150a-3p,hsa-miR-6763-5p,hsa-miR-8085	8.85579e-05	0.00153404	29.4091
20:13559008|13580981//ENST00000337743	ENST00000428119	2588	8	44	3	hsa-miR-4441,hsa-miR-4739,hsa-miR-766-5p	0.000242108	0.00347828	22.0568
20:41512846|41533570//ENST00000373222	ENST00000467076	2588	49	5	3	hsa-miR-5193,hsa-miR-6791-3p,hsa-miR-6829-3p	6.21554e-05	0.00114504	31.6898
3:138681967|138684803//ENST00000289153	ENST00000467076	2588	12	5	2	hsa-miR-6791-3p,hsa-miR-6829-3p	0.000195637	0.00293254	86.2667
20:59767186|59774490//ENST00000355648	ENST00000467076	2588	66	5	3	hsa-miR-5193,hsa-miR-6791-3p,hsa-miR-6829-3p	0.000152838	0.00239988	23.5273
12:32327461|32328555//ENST00000281474	ENST00000467076	2588	47	5	3	hsa-miR-5193,hsa-miR-6791-3p,hsa-miR-6829-3p	5.47674e-05	0.00103097	33.0383
19:51573150|51581882//ENST00000262259	ENST00000467076	2588	44	5	3	hsa-miR-5193,hsa-miR-6791-3p,hsa-miR-6829-3p	4.48115e-05	0.000871809	35.2909
X:72462004|72464731//ENST00000373568	ENST00000467076	2588	12	5	2	hsa-miR-5193,hsa-miR-6829-3p	0.000195637	0.00293254	86.2667
7:128574720|128592017//ENST00000479267	ENST00000467076	2588	20	5	2	hsa-miR-6791-3p,hsa-miR-6829-3p	0.000559712	0.00677542	51.76
3:44629065|44631221//ENST00000383745	ENST00000467076	2588	46	5	3	hsa-miR-5193,hsa-miR-6791-3p,hsa-miR-6829-3p	5.13018e-05	0.000976225	33.7565
14:30715924|30734858//ENST00000311943	ENST00000467076	2588	10	5	2	hsa-miR-5193,hsa-miR-6829-3p	0.000133596	0.00214995	103.52
1:44830848|44832341//ENST00000372192	ENST00000467076	2588	51	5	3	hsa-miR-5193,hsa-miR-6791-3p,hsa-miR-6829-3p	7.01729e-05	0.00126576	30.4471
3:138681967|138684803//ENST00000469284	ENST00000467076	2588	12	5	2	hsa-miR-6791-3p,hsa-miR-6829-3p	0.000195637	0.00293254	86.2667
15:63696124|63716473//ENST00000443617	ENST00000467076	2588	57	5	3	hsa-miR-5193,hsa-miR-6791-3p,hsa-miR-6829-3p	9.82484e-05	0.00167176	27.2421
14:102968253|102970261//ENST00000361246	ENST00000467076	2588	23	5	3	hsa-miR-5193,hsa-miR-6791-3p,hsa-miR-6829-3p	6.06633e-06	0.000159663	67.513
4:4237827|4246343//ENST00000254742	ENST00000503865	2588	6	15	2	hsa-miR-370-3p,hsa-miR-449c-5p	0.000464215	0.00584847	57.5111
2:88182699|88183073//ENST00000324166	ENST00000503865	2588	11	15	3	hsa-miR-3622a-3p,hsa-miR-3622b-3p,hsa-miR-370-3p	2.53009e-05	0.000539388	47.0545
14:66965191|67023675//ENST00000315266	ENST00000503865	2588	25	15	3	hsa-miR-3622a-3p,hsa-miR-3622b-3p,hsa-miR-6856-5p	0.000335855	0.00452468	20.704
15:80978766|80982182//ENST00000261758	ENST00000367535	2588	29	13	3	hsa-miR-3158-3p,hsa-miR-6501-3p,hsa-miR-6840-3p	0.00033577	0.00452454	20.5942
19:12679457|12680325//ENST00000595912	ENST00000367535	2588	23	13	3	hsa-miR-4436b-5p,hsa-miR-6792-3p,hsa-miR-6840-3p	0.000165608	0.00256121	25.9666
19:12679457|12680325//ENST00000210060	ENST00000367535	2588	26	13	3	hsa-miR-4436b-5p,hsa-miR-6792-3p,hsa-miR-6840-3p	0.000241014	0.00346688	22.9704
2:58198579|58232112//ENST00000402135	ENST00000252322	2588	18	28	4	hsa-miR-4459,hsa-miR-4667-5p,hsa-miR-4700-5p,hsa-miR-8089	3.02663e-05	0.000627429	20.5397
2:172568741|172596023//ENST00000282077	ENST00000252322	2588	14	28	4	hsa-miR-4667-5p,hsa-miR-4700-5p,hsa-miR-4731-5p,hsa-miR-6810-5p	1.02007e-05	0.000249224	26.4082
X:154789954|154792285//ENST00000369534	ENST00000319153	2588	16	14	3	hsa-miR-1207-5p,hsa-miR-4763-3p,hsa-miR-6836-5p	6.77632e-05	0.00122987	34.6607
9:77794463|77922345//ENST00000286548	ENST00000319153	2588	20	14	4	hsa-miR-1207-5p,hsa-miR-4763-3p,hsa-miR-6808-5p,hsa-miR-6893-5p	2.47464e-06	7.35399e-05	36.9714
X:150727215|150737448//ENST00000488357	ENST00000319153	2588	22	14	3	hsa-miR-1207-5p,hsa-miR-324-3p,hsa-miR-4763-3p	0.000182804	0.00277578	25.2078
1:52490732|52509712//ENST00000257177	ENST00000319153	2588	18	14	3	hsa-miR-1207-5p,hsa-miR-4747-5p,hsa-miR-4763-3p	9.81106e-05	0.00166989	30.8095
11:12764179|12902113//ENST00000527636	ENST00000319153	2588	55	14	6	hsa-miR-1207-5p,hsa-miR-4747-5p,hsa-miR-4763-3p,hsa-miR-6808-5p,hsa-miR-6836-5p,hsa-miR-6893-5p	1.84029e-07	7.48919e-06	20.1662
11:230452|233534//ENST00000382743	ENST00000319153	2588	27	14	3	hsa-miR-1207-5p,hsa-miR-6808-5p,hsa-miR-940	0.000341692	0.00458744	20.5397
16:30704064|30704315//ENST00000262518	ENST00000319153	2588	32	14	4	hsa-miR-1207-5p,hsa-miR-324-3p,hsa-miR-4763-3p,hsa-miR-6808-5p	1.76934e-05	0.000398471	23.1071
7:66771883|66775393//ENST00000284957	ENST00000319153	2588	23	14	3	hsa-miR-1207-5p,hsa-miR-6808-5p,hsa-miR-940	0.000209552	0.00309826	24.1118
11:230452|233534//ENST00000529055	ENST00000319153	2588	33	14	4	hsa-miR-1207-5p,hsa-miR-4763-3p,hsa-miR-6808-5p,hsa-miR-940	2.00712e-05	0.000443785	22.4069
X:150727215|150737448//ENST00000370390	ENST00000319153	2588	24	14	3	hsa-miR-1207-5p,hsa-miR-324-3p,hsa-miR-4763-3p	0.000238722	0.00343951	23.1071
9:125341177|125346941//ENST00000297933	ENST00000382164	2588	8	31	3	hsa-miR-4658,hsa-miR-4691-3p,hsa-miR-6790-5p	8.37482e-05	0.0014642	31.3065
9:123667026|123879021//ENST00000373620	ENST00000578648	2588	12	21	3	hsa-miR-1909-5p,hsa-miR-4269,hsa-miR-6753-5p	9.67328e-05	0.00165007	30.8095
9:123652013|123879021//ENST00000373620	ENST00000578648	2588	12	21	3	hsa-miR-1909-5p,hsa-miR-4269,hsa-miR-6753-5p	9.67328e-05	0.00165007	30.8095
9:123667026|123879021//ENST00000373618	ENST00000578648	2588	11	21	3	hsa-miR-1909-5p,hsa-miR-4269,hsa-miR-6753-5p	7.29303e-05	0.00130537	33.6104
7:128574720|128592017//ENST00000479267	ENST00000578648	2588	20	21	4	hsa-miR-185-3p,hsa-miR-1909-5p,hsa-miR-6813-5p,hsa-miR-6817-5p	1.42897e-05	0.000332388	24.6476
9:123652013|123879021//ENST00000373618	ENST00000578648	2588	11	21	3	hsa-miR-1909-5p,hsa-miR-4269,hsa-miR-6753-5p	7.29303e-05	0.00130537	33.6104
11:68759569|68761687//ENST00000265641	ENST00000617050	2588	17	6	2	hsa-miR-1910-3p,hsa-miR-6511a-5p	0.000600027	0.00715399	50.7451
14:23033368|23033674//ENST00000334454	ENST00000617050	2588	20	6	2	hsa-miR-4691-3p,hsa-miR-650	0.000835676	0.00925566	43.1333
1:168231514|168236770//ENST00000367829	ENST00000617050	2588	16	6	2	hsa-miR-1910-3p,hsa-miR-6511a-5p	0.000529983	0.00649161	53.9167
9:33068824|33073806//ENST00000397149	ENST00000617050	2588	21	6	2	hsa-miR-4691-3p,hsa-miR-650	0.000922686	0.00999232	41.0794
4:102906536|102912129//ENST00000503584	ENST00000617050	2588	21	6	2	hsa-miR-650,hsa-miR-6511a-5p	0.000922686	0.00999232	41.0794
1:168231514|168236770//ENST00000271375	ENST00000617050	2588	19	6	2	hsa-miR-1910-3p,hsa-miR-6511a-5p	0.000752887	0.00853159	45.4035
8:86494829|86507112//ENST00000522804	ENST00000587502	2588	29	12	4	hsa-miR-4459,hsa-miR-4695-5p,hsa-miR-665,hsa-miR-6778-5p	5.92452e-06	0.000156516	29.7471
17:64562771|64571956//ENST00000262435	ENST00000587502	2588	11	12	3	hsa-miR-4459,hsa-miR-4695-5p,hsa-miR-665	1.23191e-05	0.000292915	58.8182
2:58198579|58232112//ENST00000402135	ENST00000587502	2588	18	12	3	hsa-miR-4459,hsa-miR-4695-5p,hsa-miR-665	5.98172e-05	0.00110955	35.9444
7:130945720|131052555//ENST00000451786	ENST00000587502	2588	28	12	3	hsa-miR-4459,hsa-miR-4695-5p,hsa-miR-665	0.000233935	0.00338395	23.1071
7:75199651|75202613//ENST00000614592	ENST00000587502	2588	11	12	3	hsa-miR-4459,hsa-miR-4695-5p,hsa-miR-665	1.23191e-05	0.000292915	58.8182
2:159777938|159783469//ENST00000480212	ENST00000587502	2588	26	12	3	hsa-miR-4459,hsa-miR-4695-5p,hsa-miR-665	0.000186639	0.00282301	24.8846
5:38527155|38530666//ENST00000263409	ENST00000420764	2588	3	34	2	hsa-miR-520a-5p,hsa-miR-525-5p	0.000498604	0.00618483	50.7451
1:35470863|35479212//ENST00000325722	ENST00000375692	2588	16	40	5	hsa-miR-1249-5p,hsa-miR-4665-5p,hsa-miR-6127,hsa-miR-6133,hsa-miR-6797-5p	2.6321e-06	7.76013e-05	20.2188
1:35470863|35479212//ENST00000431916	ENST00000375692	2588	13	40	5	hsa-miR-1249-5p,hsa-miR-4665-5p,hsa-miR-6127,hsa-miR-6133,hsa-miR-6797-5p	8.02405e-07	2.74937e-05	24.8846
X:37386599|37426000//ENST00000449135	ENST00000263070	2588	6	35	3	hsa-miR-1229-5p,hsa-miR-6812-5p,hsa-miR-6825-5p	4.41116e-05	0.000860447	36.9714
16:3504720|3512478//ENST00000574369	ENST00000263070	2588	10	35	3	hsa-miR-3064-5p,hsa-miR-6882-3p,hsa-miR-7154-5p	0.00025499	0.00362802	22.1829
16:15776078|15786732//ENST00000300036	ENST00000579340	2588	11	50	5	hsa-miR-1233-5p,hsa-miR-3689a-3p,hsa-miR-3689b-3p,hsa-miR-3689c,hsa-miR-6778-5p	9.30387e-07	3.1294e-05	23.5273
1:219179147|219211752//ENST00000474379	ENST00000579340	2588	10	50	4	hsa-miR-30b-3p,hsa-miR-6779-5p,hsa-miR-6780a-5p,hsa-miR-8073	2.37971e-05	0.000512121	20.704
1:219179147|219211752//ENST00000477938	ENST00000579340	2588	10	50	4	hsa-miR-30b-3p,hsa-miR-6779-5p,hsa-miR-6780a-5p,hsa-miR-8073	2.37971e-05	0.000512121	20.704
10:110100625|110112915//ENST00000277900	ENST00000579340	2588	10	50	4	hsa-miR-30b-3p,hsa-miR-6779-5p,hsa-miR-6780a-5p,hsa-miR-6893-5p	2.37971e-05	0.000512121	20.704
1:219179147|219211752//ENST00000460522	ENST00000579340	2588	10	50	4	hsa-miR-30b-3p,hsa-miR-6779-5p,hsa-miR-6780a-5p,hsa-miR-8073	2.37971e-05	0.000512121	20.704
2:31917926|31932135//ENST00000295065	ENST00000621965	2588	9	32	3	hsa-miR-423-5p,hsa-miR-6743-5p,hsa-miR-6758-5p	0.000137252	0.00219788	26.9583
4:53425872|53444103//ENST00000306932	ENST00000620047	2588	25	18	4	hsa-miR-1249-5p,hsa-miR-6779-5p,hsa-miR-6780a-5p,hsa-miR-6797-5p	1.89453e-05	0.000422471	23.0044
6:158448996|158452268//ENST00000367094	ENST00000620047	2588	19	18	3	hsa-miR-149-3p,hsa-miR-4728-5p,hsa-miR-6785-5p	0.000255544	0.003634	22.7018
8:47407861|47440542//ENST00000297423	ENST00000620047	2588	22	18	6	hsa-miR-1249-5p,hsa-miR-149-3p,hsa-miR-4728-5p,hsa-miR-6779-5p,hsa-miR-6780a-5p,hsa-miR-6797-5p	3.13157e-09	1.9504e-07	39.2121
3:4410865|4420146//ENST00000272902	ENST00000620047	2588	26	18	6	hsa-miR-1249-5p,hsa-miR-149-3p,hsa-miR-4728-5p,hsa-miR-6780a-5p,hsa-miR-6785-5p,hsa-miR-6797-5p	9.50921e-09	5.31385e-07	33.1795
4:53425872|53444103//ENST00000358575	ENST00000620047	2588	26	18	4	hsa-miR-1249-5p,hsa-miR-6779-5p,hsa-miR-6780a-5p,hsa-miR-6797-5p	2.22926e-05	0.000484944	22.1197
2:160313156|160367391//ENST00000348849	ENST00000620047	2588	37	18	6	hsa-miR-149-3p,hsa-miR-608,hsa-miR-6779-5p,hsa-miR-6785-5p,hsa-miR-6812-5p,hsa-miR-6819-5p	9.18701e-08	4.03711e-06	23.3153
11:9989497|10002689//ENST00000256190	ENST00000620047	2588	37	18	8	hsa-miR-1249-5p,hsa-miR-149-3p,hsa-miR-4728-5p,hsa-miR-6779-5p,hsa-miR-6780a-5p,hsa-miR-6785-5p,hsa-miR-6797-5p,hsa-miR-8059	3.0945e-11	2.94405e-09	31.0871
10:115120185|115241725//ENST00000355044	ENST00000612907	2588	13	8	2	hsa-miR-4691-5p,hsa-miR-518c-5p	0.000641392	0.00753621	49.7692
9:85822880|85830576//ENST00000431724	ENST00000612907	2588	47	8	3	hsa-miR-665,hsa-miR-6812-5p,hsa-miR-7113-5p	0.00029512	0.00407875	20.6489
10:110100625|110112915//ENST00000497125	ENST00000543824	2588	9	41	3	hsa-miR-6779-5p,hsa-miR-6780a-5p,hsa-miR-7106-5p	0.000290363	0.00402644	21.0407
4:128077788|128082305//ENST00000326639	ENST00000543824	2588	8	41	3	hsa-miR-1199-5p,hsa-miR-4713-3p,hsa-miR-6809-3p	0.000195729	0.0029334	23.6707
X:32216916|32310276//ENST00000357033	ENST00000371838	2588	7	15	2	hsa-miR-30c-1-3p,hsa-miR-30c-2-3p	0.000647724	0.00759015	49.2952
X:32287529|32310276//ENST00000357033	ENST00000371838	2588	7	15	2	hsa-miR-30c-1-3p,hsa-miR-30c-2-3p	0.000647724	0.00759015	49.2952
11:120476661|120477526//ENST00000356641	ENST00000397763	2588	13	43	6	hsa-miR-378a-3p,hsa-miR-378c,hsa-miR-378d,hsa-miR-378e,hsa-miR-378f,hsa-miR-7156-3p	2.31249e-08	1.17946e-06	27.7782
13:40940921|40941370//ENST00000239882	ENST00000397763	2588	24	43	8	hsa-miR-378a-3p,hsa-miR-378b,hsa-miR-378c,hsa-miR-378d,hsa-miR-378e,hsa-miR-378f,hsa-miR-378h,hsa-miR-6825-3p	1.77846e-09	1.16961e-07	20.062
5:157359005|157361598//ENST00000435847	ENST00000505878	2588	29	12	3	hsa-miR-5090,hsa-miR-6727-5p,hsa-miR-6775-5p	0.000260244	0.0036871	22.3103
5:74813840|74841679//ENST00000510609	ENST00000456783	2588	11	44	5	hsa-miR-106a-5p,hsa-miR-106b-5p,hsa-miR-17-5p,hsa-miR-20a-5p,hsa-miR-20b-5p	4.82528e-07	1.75666e-05	26.7355
5:74834426|74841679//ENST00000389156	ENST00000456783	2588	12	44	5	hsa-miR-106a-5p,hsa-miR-106b-5p,hsa-miR-17-5p,hsa-miR-20a-5p,hsa-miR-20b-5p	8.16785e-07	2.79232e-05	24.5076
6:83934595|83936376//ENST00000369681	ENST00000456783	2588	3	44	2	hsa-miR-103a-3p,hsa-miR-107	0.000838598	0.0092768	39.2121
5:74813840|74841679//ENST00000389156	ENST00000456783	2588	14	44	5	hsa-miR-106a-5p,hsa-miR-106b-5p,hsa-miR-17-5p,hsa-miR-20a-5p,hsa-miR-20b-5p	2.01304e-06	6.14296e-05	21.0065
10:86467279|86473973//ENST00000263070	ENST00000513878	2588	22	18	4	hsa-miR-4436b-3p,hsa-miR-4632-5p,hsa-miR-6735-5p,hsa-miR-6879-5p	1.10994e-05	0.000267951	26.1414
1:11068008|11076948//ENST00000376936	ENST00000513878	2588	19	18	3	hsa-miR-4436b-3p,hsa-miR-6735-5p,hsa-miR-7843-5p	0.000255544	0.003634	22.7018
6:42650284|42652645//ENST00000372899	ENST00000513878	2588	11	18	3	hsa-miR-4632-5p,hsa-miR-6735-5p,hsa-miR-6879-5p	4.5059e-05	0.000875866	39.2121
11:61271675|61274584//ENST00000301770	ENST00000513878	2588	32	18	5	hsa-miR-4436b-3p,hsa-miR-4632-5p,hsa-miR-6735-5p,hsa-miR-6837-5p,hsa-miR-6879-5p	1.59775e-06	5.02295e-05	22.4653
1:11068008|11076948//ENST00000474216	ENST00000513878	2588	20	18	3	hsa-miR-4436b-3p,hsa-miR-6735-5p,hsa-miR-7843-5p	0.000299331	0.00412563	21.5667
1:43920404|43920928//ENST00000262915	ENST00000513878	2588	21	18	4	hsa-miR-4436b-3p,hsa-miR-4632-5p,hsa-miR-6879-5p,hsa-miR-7843-5p	9.12097e-06	0.000226453	27.3862
12:72618891|72621751//ENST00000261180	ENST00000418587	2588	10	10	2	hsa-miR-520a-5p,hsa-miR-525-5p	0.000595005	0.00710843	51.76
5:38510464|38530666//ENST00000263409	ENST00000418587	2588	12	10	2	hsa-miR-520a-5p,hsa-miR-525-5p	0.000869077	0.00953846	43.1333
19:20792512|20793878//ENST00000344519	ENST00000418587	2588	4	10	2	hsa-miR-520a-5p,hsa-miR-525-5p	8.0323e-05	0.0014153	129.4
7:137912991|137916012//ENST00000616381	ENST00000418587	2588	11	10	2	hsa-miR-520a-5p,hsa-miR-525-5p	0.000725728	0.00829611	47.0545
5:38527155|38530666//ENST00000263409	ENST00000418587	2588	3	10	2	hsa-miR-520a-5p,hsa-miR-525-5p	4.02445e-05	0.000796999	172.533
2:144424796|144430026//ENST00000636732	ENST00000418587	2588	13	10	3	hsa-miR-198,hsa-miR-520a-5p,hsa-miR-525-5p	1.16539e-05	0.000279363	59.7231
14:35625361|35635598//ENST00000307138	ENST00000418587	2588	23	10	4	hsa-miR-198,hsa-miR-3922-5p,hsa-miR-520a-5p,hsa-miR-525-5p	9.62483e-07	3.2245e-05	45.0087
14:90676523|90689712//ENST00000328459	ENST00000418587	2588	20	10	3	hsa-miR-198,hsa-miR-520a-5p,hsa-miR-525-5p	4.57949e-05	0.000887411	38.82
1:25448808|25456831//ENST00000374343	ENST00000418587	2588	11	10	2	hsa-miR-525-5p,hsa-miR-6760-5p	0.000725728	0.00829611	47.0545
2:144424796|144430026//ENST00000392861	ENST00000418587	2588	11	10	3	hsa-miR-198,hsa-miR-520a-5p,hsa-miR-525-5p	6.75087e-06	0.00017518	70.5818
2:144424796|144430026//ENST00000303660	ENST00000418587	2588	11	10	3	hsa-miR-198,hsa-miR-520a-5p,hsa-miR-525-5p	6.75087e-06	0.00017518	70.5818
16:70463169|70463774//ENST00000288078	ENST00000602318	2588	23	3	2	hsa-miR-5195-3p,hsa-miR-619-3p	0.000225504	0.00328556	75.0145
17:50736960|50741731//ENST00000240304	ENST00000524944	2588	5	21	2	hsa-miR-4726-5p,hsa-miR-6878-3p	0.000618149	0.00732321	49.2952
10:119902799|119904277//ENST00000369075	ENST00000598197	2588	11	9	2	hsa-miR-149-5p,hsa-miR-5580-5p	0.000581933	0.00698748	52.2828
6:136637325|136659378//ENST00000359015	ENST00000587708	2588	8	28	3	hsa-miR-3660,hsa-miR-4526,hsa-miR-6780a-3p	6.13044e-05	0.00113211	34.6607
8:30700081|30703240//ENST00000221130	ENST00000405772	2588	10	7	2	hsa-miR-608,hsa-miR-6782-5p	0.000279394	0.00390381	73.9429
19:10637644|10638315//ENST00000591194	ENST00000405772	2588	16	7	2	hsa-miR-608,hsa-miR-6782-5p	0.000739301	0.00841095	46.2143
13:20064451|20083032//ENST00000382870	ENST00000405772	2588	11	7	2	hsa-miR-1273d,hsa-miR-4482-5p	0.000341041	0.00458098	67.2208
9:124799285|124801663//ENST00000331715	ENST00000405772	2588	54	7	3	hsa-miR-4651,hsa-miR-608,hsa-miR-6782-5p	0.000283454	0.00395235	20.5397
8:86494829|86507112//ENST00000522804	ENST00000309877	2588	29	4	2	hsa-miR-6134,hsa-miR-650	0.000717598	0.00822446	44.6207
8:38429682|38429948//ENST00000335922	ENST00000407230	2588	25	9	3	hsa-miR-3692-5p,hsa-miR-4776-5p,hsa-miR-4800-5p	6.443e-05	0.00117944	34.5067
2:86108350|86119044//ENST00000254630	ENST00000596348	2588	7	19	3	hsa-miR-3188,hsa-miR-550a-3-5p,hsa-miR-550a-5p	1.15364e-05	0.000276944	58.3759
1:236032401|236038253//ENST00000264187	ENST00000596348	2588	19	19	3	hsa-miR-1227-5p,hsa-miR-4640-5p,hsa-miR-4731-5p	0.00030205	0.00415427	21.5069
10:60084602|60088358//ENST00000280772	ENST00000596348	2588	20	19	4	hsa-miR-4254,hsa-miR-637,hsa-miR-663a,hsa-miR-6787-5p	9.34681e-06	0.000231176	27.2421
16:68025415|68054617//ENST00000565263	ENST00000596348	2588	19	19	3	hsa-miR-1227-5p,hsa-miR-4640-5p,hsa-miR-6837-5p	0.00030205	0.00415427	21.5069
10:119838535|119842595//ENST00000360003	ENST00000456883	2588	9	41	3	hsa-miR-5189-5p,hsa-miR-612,hsa-miR-6860	0.000290363	0.00402644	21.0407
9:75932379|75986245//ENST00000376752	ENST00000456883	2588	6	41	3	hsa-miR-5189-5p,hsa-miR-612,hsa-miR-6860	7.14679e-05	0.00128427	31.561
13:45411362|45411938//ENST00000310862	ENST00000456883	2588	9	41	3	hsa-miR-3194-5p,hsa-miR-6849-3p,hsa-miR-6860	0.000290363	0.00402644	21.0407
2:183133566|183159652//ENST00000295119	ENST00000456883	2588	14	41	5	hsa-miR-5189-5p,hsa-miR-612,hsa-miR-615-3p,hsa-miR-6773-3p,hsa-miR-6860	1.40138e-06	4.47744e-05	22.5436
5:74813840|74841679//ENST00000510609	ENST00000573708	2588	11	36	5	hsa-miR-106a-5p,hsa-miR-106b-5p,hsa-miR-17-5p,hsa-miR-20a-5p,hsa-miR-20b-5p	1.70145e-07	6.98677e-06	32.6768
5:108946130|108959347//ENST00000281092	ENST00000573708	2588	19	36	6	hsa-miR-106a-5p,hsa-miR-106b-5p,hsa-miR-17-5p,hsa-miR-20a-5p,hsa-miR-20b-5p,hsa-miR-93-5p	1.11825e-07	4.81231e-06	22.7018
5:74834426|74841679//ENST00000389156	ENST00000573708	2588	12	36	5	hsa-miR-106a-5p,hsa-miR-106b-5p,hsa-miR-17-5p,hsa-miR-20a-5p,hsa-miR-20b-5p	2.88759e-07	1.11675e-05	29.9537
5:74813840|74841679//ENST00000389156	ENST00000573708	2588	14	36	5	hsa-miR-106a-5p,hsa-miR-106b-5p,hsa-miR-17-5p,hsa-miR-20a-5p,hsa-miR-20b-5p	7.15386e-07	2.4851e-05	25.6746
3:65018441|65050822//XLOC.132426.12	ENST00000573708	2588	46	36	17	hsa-miR-106a-5p,hsa-miR-106b-5p,hsa-miR-1273g-3p,hsa-miR-1304-3p,hsa-miR-17-5p,hsa-miR-20a-5p,hsa-miR-20b-5p,hsa-miR-373-3p,hsa-miR-378a-5p,hsa-miR-4430,hsa-miR-500b-3p,hsa-miR-619-5p,hsa-miR-640,hsa-miR-6747-3p,hsa-miR-6843-3p,hsa-miR-764,hsa-miR-93-5p	4.3877e-22	2.73785e-19	26.5676
11:111836165|111838378//ENST00000398006	ENST00000220809	2588	11	35	3	hsa-miR-3185,hsa-miR-3692-5p,hsa-miR-92a-1-5p	0.000347364	0.00464854	20.1662
10:12117673|12120267//ENST00000263035	ENST00000220809	2588	8	35	3	hsa-miR-4270,hsa-miR-4747-5p,hsa-miR-5196-5p	0.000121232	0.00198653	27.7286
17:50736960|50741731//ENST00000240304	ENST00000220809	2588	5	35	3	hsa-miR-3147,hsa-miR-4640-5p,hsa-miR-4726-5p	2.22624e-05	0.000484455	44.3657
11:111836165|111838399//ENST00000531154	ENST00000220809	2588	11	35	3	hsa-miR-3185,hsa-miR-3692-5p,hsa-miR-92a-1-5p	0.000347364	0.00464854	20.1662
7:75199651|75202613//ENST00000614592	ENST00000220809	2588	11	35	3	hsa-miR-1236-3p,hsa-miR-3612,hsa-miR-4695-5p	0.000347364	0.00464854	20.1662
6:73466209|73466606//ENST00000370300	ENST00000255304	2588	11	3	2	hsa-miR-199a-5p,hsa-miR-199b-5p	4.9175e-05	0.000942669	156.848
3:113488945|113499582//ENST00000295872	ENST00000255304	2588	6	3	2	hsa-miR-199a-5p,hsa-miR-199b-5p	1.34287e-05	0.000315289	287.556
19:12145258|12146224//ENST00000434822	ENST00000255304	2588	20	3	2	hsa-miR-199a-5p,hsa-miR-199b-5p	0.000169482	0.00261072	86.2667
10:125995417|126008550//ENST00000368693	ENST00000255304	2588	28	3	2	hsa-miR-199a-5p,hsa-miR-199b-5p	0.000336482	0.00453119	61.619
10:125995417|126008550//ENST00000368691	ENST00000255304	2588	28	3	2	hsa-miR-199a-5p,hsa-miR-199b-5p	0.000336482	0.00453119	61.619
13:30227412|30283791//ENST00000380615	ENST00000589289	2588	38	10	3	hsa-miR-550a-3-5p,hsa-miR-550a-5p,hsa-miR-6768-5p	0.000326653	0.00442537	20.4316
1:100913663|100921841//ENST00000357650	ENST00000589289	2588	12	10	3	hsa-miR-550a-3-5p,hsa-miR-550a-5p,hsa-miR-550b-2-5p	8.98285e-06	0.000223529	64.7
2:86108350|86119044//ENST00000254630	ENST00000589289	2588	7	10	2	hsa-miR-550a-3-5p,hsa-miR-550a-5p	0.000279394	0.00390381	73.9429
1:100906852|100921841//ENST00000357650	ENST00000589289	2588	22	10	3	hsa-miR-550a-3-5p,hsa-miR-550a-5p,hsa-miR-550b-2-5p	6.16116e-05	0.00113666	35.2909
3:183033991|183041750//ENST00000265594	ENST00000589289	2588	21	10	3	hsa-miR-550a-3-5p,hsa-miR-550a-5p,hsa-miR-550b-2-5p	5.33186e-05	0.00100846	36.9714
12:91151654|91158509//ENST00000052754	ENST00000452464	2588	19	15	3	hsa-miR-1202,hsa-miR-3972,hsa-miR-6891-5p	0.000144494	0.00229133	27.2421
17:82127692|82134194//ENST00000392346	ENST00000277480	2588	68	14	9	hsa-miR-3150a-3p,hsa-miR-4498,hsa-miR-4667-5p,hsa-miR-5001-5p,hsa-miR-608,hsa-miR-6763-5p,hsa-miR-762,hsa-miR-8089,hsa-miR-939-5p	6.28173e-12	6.85014e-10	24.4664
9:96827080|96852005//ENST00000466833	ENST00000277480	2588	6	14	2	hsa-miR-3150a-3p,hsa-miR-6763-5p	0.000402736	0.00522554	61.619
22:41338313|41339191//ENST00000352645	ENST00000277480	2588	33	14	6	hsa-miR-3150a-3p,hsa-miR-4667-5p,hsa-miR-6763-5p,hsa-miR-762,hsa-miR-8089,hsa-miR-939-5p	7.45922e-09	4.26688e-07	33.6104
5:113082860|113085310//ENST00000302475	ENST00000277480	2588	26	14	3	hsa-miR-4498,hsa-miR-5001-5p,hsa-miR-762	0.000304701	0.00418428	21.3297
15:22541995|22543138//ENST00000613386	ENST00000277480	2588	35	14	4	hsa-miR-3150a-3p,hsa-miR-4667-5p,hsa-miR-6763-5p,hsa-miR-939-5p	2.55228e-05	0.000543198	21.1265
3:14443624|14447816//ENST00000622176	ENST00000277480	2588	44	14	5	hsa-miR-3150a-3p,hsa-miR-4469,hsa-miR-4667-5p,hsa-miR-6763-5p,hsa-miR-8089	2.01304e-06	6.14296e-05	21.0065
4:9980592|9996941//ENST00000264784	ENST00000277480	2588	23	14	4	hsa-miR-1343-5p,hsa-miR-3150a-3p,hsa-miR-6763-5p,hsa-miR-939-5p	4.48078e-06	0.000123022	32.1491
2:121503167|121530325//ENST00000263710	ENST00000277480	2588	22	14	3	hsa-miR-4469,hsa-miR-4667-5p,hsa-miR-8089	0.000182804	0.00277578	25.2078
15:99671323|99675458//ENST00000338042	ENST00000277480	2588	21	14	3	hsa-miR-4498,hsa-miR-5001-5p,hsa-miR-762	0.000158382	0.00247022	26.4082
19:6010136|6016271//ENST00000589742	ENST00000277480	2588	21	14	3	hsa-miR-3150a-3p,hsa-miR-4498,hsa-miR-762	0.000158382	0.00247022	26.4082
3:136026832|136049361//ENST00000264977	ENST00000366732	2588	29	9	4	hsa-miR-3652,hsa-miR-4430,hsa-miR-6815-5p,hsa-miR-6865-5p	1.54362e-06	4.8743e-05	39.6628
9:111914605|111926496//ENST00000374279	ENST00000366732	2588	9	9	2	hsa-miR-6815-5p,hsa-miR-6865-5p	0.000382281	0.00501236	63.9012
11:63895159|63895633//ENST00000350490	ENST00000366732	2588	19	9	3	hsa-miR-3652,hsa-miR-4430,hsa-miR-6865-5p	2.74309e-05	0.00057724	45.4035
4:109659011|109664394//ENST00000394650	ENST00000366732	2588	5	9	2	hsa-miR-6815-5p,hsa-miR-6865-5p	0.000106959	0.00179235	115.022
9:111914605|111926496//ENST00000495085	ENST00000366732	2588	9	9	2	hsa-miR-6815-5p,hsa-miR-6865-5p	0.000382281	0.00501236	63.9012
1:64602806|64634260//ENST00000495994	ENST00000366732	2588	12	9	2	hsa-miR-3652,hsa-miR-4430	0.000697058	0.00803827	47.9259
1:64629355|64634260//ENST00000495994	ENST00000366732	2588	8	9	2	hsa-miR-3652,hsa-miR-4430	0.000297867	0.00410959	71.8889
2:61499713|61502310//ENST00000401558	ENST00000437550	2588	3	15	2	hsa-miR-4259,hsa-miR-6801-5p	9.37825e-05	0.00160889	115.022
3:66243203|66263379//ENST00000336733	ENST00000437550	2588	6	15	2	hsa-miR-1914-5p,hsa-miR-6889-3p	0.000464215	0.00584847	57.5111
9:76067955|76071898//ENST00000376752	ENST00000375663	2588	11	7	2	hsa-miR-6751-5p,hsa-miR-6803-5p	0.000341041	0.00458098	67.2208
5:173108624|173123202//ENST00000520464	ENST00000375663	2588	68	7	4	hsa-miR-6751-5p,hsa-miR-6752-5p,hsa-miR-6803-5p,hsa-miR-7110-5p	1.43946e-05	0.000334522	21.7479
7:137912991|137916012//ENST00000330387	ENST00000375663	2588	17	7	2	hsa-miR-6751-5p,hsa-miR-6803-5p	0.000836792	0.00926133	43.4958
X:40588986|40597664//ENST00000636574	ENST00000375663	2588	24	7	3	hsa-miR-6734-5p,hsa-miR-6751-5p,hsa-miR-6803-5p	2.39566e-05	0.000514968	46.2143
2:99418828|99435941//ENST00000258428	ENST00000375663	2588	17	7	2	hsa-miR-6751-5p,hsa-miR-6803-5p	0.000836792	0.00926133	43.4958
11:46889411|46890494//ENST00000378623	ENST00000375663	2588	39	7	4	hsa-miR-6751-5p,hsa-miR-6752-5p,hsa-miR-6803-5p,hsa-miR-7110-5p	1.49409e-06	4.73799e-05	37.9194
8:30680904|30700135//ENST00000546342	ENST00000375663	2588	29	7	3	hsa-miR-4769-3p,hsa-miR-6752-5p,hsa-miR-7110-5p	4.2998e-05	0.000842453	38.2463
8:30680904|30700135//ENST00000221130	ENST00000375663	2588	37	7	3	hsa-miR-4769-3p,hsa-miR-6752-5p,hsa-miR-7110-5p	9.05813e-05	0.00156418	29.9768
8:30680904|30700135//ENST00000541648	ENST00000375663	2588	29	7	3	hsa-miR-4769-3p,hsa-miR-6752-5p,hsa-miR-7110-5p	4.2998e-05	0.000842453	38.2463
2:99418828|99435941//ENST00000393445	ENST00000375663	2588	17	7	2	hsa-miR-6751-5p,hsa-miR-6803-5p	0.000836792	0.00926133	43.4958
8:30680904|30700135//ENST00000537535	ENST00000375663	2588	23	7	3	hsa-miR-4769-3p,hsa-miR-6752-5p,hsa-miR-7110-5p	2.09865e-05	0.00046072	48.2236
X:40588986|40597664//ENST00000378438	ENST00000375663	2588	25	7	3	hsa-miR-6734-5p,hsa-miR-6751-5p,hsa-miR-6803-5p	2.71917e-05	0.000573139	44.3657
X:40588986|40597664//ENST00000636287	ENST00000375663	2588	24	7	3	hsa-miR-6734-5p,hsa-miR-6751-5p,hsa-miR-6803-5p	2.39566e-05	0.000514968	46.2143
2:216141186|216148276//ENST00000392132	ENST00000375663	2588	8	7	2	hsa-miR-6751-5p,hsa-miR-6803-5p	0.000174295	0.00267145	92.4286
4:147939825|148023413//ENST00000336498	ENST00000375663	2588	33	7	4	hsa-miR-6751-5p,hsa-miR-6752-5p,hsa-miR-6803-5p,hsa-miR-7110-5p	7.47507e-07	2.58269e-05	44.8139
2:32098796|32116212//ENST00000315285	ENST00000452109	2588	16	21	4	hsa-miR-34a-5p,hsa-miR-34c-5p,hsa-miR-449b-5p,hsa-miR-449c-5p	5.48252e-06	0.000146389	30.8095
2:241407537|241431774//ENST00000264042	ENST00000452109	2588	17	21	4	hsa-miR-34a-5p,hsa-miR-449b-5p,hsa-miR-449c-5p,hsa-miR-4722-5p	7.13167e-06	0.000183561	28.9972
11:118754705|118758902//ENST00000526070	ENST00000452109	2588	17	21	4	hsa-miR-34a-5p,hsa-miR-34c-5p,hsa-miR-449b-5p,hsa-miR-449c-5p	7.13167e-06	0.000183561	28.9972
14:105252507|105272894//ENST00000327359	ENST00000452109	2588	21	21	5	hsa-miR-34a-5p,hsa-miR-34b-5p,hsa-miR-34c-5p,hsa-miR-449b-5p,hsa-miR-449c-5p	3.9547e-07	1.47381e-05	29.3424
11:118758774|118763306//ENST00000526070	ENST00000452109	2588	8	21	4	hsa-miR-34a-5p,hsa-miR-34c-5p,hsa-miR-449b-5p,hsa-miR-449c-5p	2.19966e-07	8.77099e-06	61.619
2:220753613|220776862//XLOC.113846.1	ENST00000452109	2588	29	21	5	hsa-miR-34a-5p,hsa-miR-34b-5p,hsa-miR-34c-5p,hsa-miR-449b-5p,hsa-miR-449c-5p	2.214e-06	6.67511e-05	21.2479
5:113082860|113085310//ENST00000302475	ENST00000613898	2588	26	11	3	hsa-miR-4446-3p,hsa-miR-4498,hsa-miR-5001-5p	0.000140919	0.00224512	27.1469
5:73058433|73077493//ENST00000430046	ENST00000613898	2588	29	11	3	hsa-miR-4446-3p,hsa-miR-4498,hsa-miR-5001-5p	0.000196664	0.00294413	24.3386
1:95143891|95173889//ENST00000370203	ENST00000613898	2588	11	11	2	hsa-miR-4498,hsa-miR-5001-5p	0.000884943	0.00966885	42.7769
9:137564434|137565154//ENST00000479650	ENST00000613898	2588	32	11	3	hsa-miR-4446-3p,hsa-miR-4498,hsa-miR-5001-5p	0.000265093	0.00374343	22.0568
13:45411362|45411938//ENST00000310862	ENST00000613898	2588	9	11	2	hsa-miR-4446-3p,hsa-miR-512-5p	0.000581933	0.00698748	52.2828
5:73832338|73840760//ENST00000296794	ENST00000613898	2588	13	11	3	hsa-miR-4446-3p,hsa-miR-4498,hsa-miR-5001-5p	1.59777e-05	0.000365636	54.2937
5:138372674|138379708//ENST00000314358	ENST00000613898	2588	23	11	3	hsa-miR-4446-3p,hsa-miR-4498,hsa-miR-5001-5p	9.66609e-05	0.00164927	30.6877
9:4823548|4849550//ENST00000442869	ENST00000618673	2588	36	7	3	hsa-miR-1291,hsa-miR-6803-5p,hsa-miR-6856-5p	8.33344e-05	0.0014582	30.8095
6:42650284|42652645//ENST00000372899	ENST00000618673	2588	11	7	2	hsa-miR-4632-5p,hsa-miR-6879-5p	0.000341041	0.00458098	67.2208
9:4823548|4849550//ENST00000381750	ENST00000618673	2588	40	7	3	hsa-miR-1291,hsa-miR-6803-5p,hsa-miR-6856-5p	0.000114776	0.00189936	27.7286
6:17507169|17513954//ENST00000229922	ENST00000618673	2588	12	7	2	hsa-miR-4632-5p,hsa-miR-6879-5p	0.000408722	0.00528673	61.619
11:108267171|108267342//ENST00000278616	ENST00000495082	2588	2	1	1	hsa-miR-4691-5p	0.000772798	0.00870869	1294
17:69155019|69155925//ENST00000269081	ENST00000495082	2588	2	1	1	hsa-miR-4691-5p	0.000772798	0.00870869	1294
1:229460611|229465519//ENST00000261396	ENST00000327359	2588	12	27	3	hsa-miR-4733-3p,hsa-miR-4784,hsa-miR-5000-3p	0.000209419	0.00309688	23.963
12:116096669|116111512//ENST00000281928	ENST00000596136	2588	2	7	2	hsa-miR-2278,hsa-miR-4709-3p	6.27319e-06	0.000164441	369.714
3:195306511|195336976//ENST00000439758	ENST00000275300	2588	7	34	3	hsa-miR-1254,hsa-miR-3116,hsa-miR-6872-3p	7.00057e-05	0.00126319	32.6218
3:195306511|195336976//ENST00000326793	ENST00000275300	2588	7	34	3	hsa-miR-1254,hsa-miR-3116,hsa-miR-6872-3p	7.00057e-05	0.00126319	32.6218
3:195306511|195336976//ENST00000635383	ENST00000275300	2588	7	34	3	hsa-miR-1254,hsa-miR-3116,hsa-miR-6872-3p	7.00057e-05	0.00126319	32.6218
12:22482557|22506819//ENST00000545552	ENST00000392542	2588	17	22	3	hsa-miR-665,hsa-miR-6819-3p,hsa-miR-6877-3p	0.000335889	0.00452468	20.7594
12:104120400|104123423//ENST00000240055	ENST00000392542	2588	5	22	2	hsa-miR-134-5p,hsa-miR-6780a-3p	0.000679436	0.00788438	47.0545
14:105252507|105272894//ENST00000327359	ENST00000392542	2588	21	22	4	hsa-miR-2682-5p,hsa-miR-4514,hsa-miR-4673,hsa-miR-4692	2.13478e-05	0.000467361	22.4069
15:96285326|96290783//ENST00000561344	ENST00000392542	2588	20	22	4	hsa-miR-4514,hsa-miR-4673,hsa-miR-4692,hsa-miR-6894-3p	1.73785e-05	0.000392482	23.5273
12:22482557|22506819//ENST00000333957	ENST00000392542	2588	15	22	3	hsa-miR-665,hsa-miR-6819-3p,hsa-miR-6877-3p	0.000227246	0.0033058	23.5273
15:96285326|96290783//ENST00000502125	ENST00000392542	2588	18	22	4	hsa-miR-4514,hsa-miR-4673,hsa-miR-4692,hsa-miR-6894-3p	1.10994e-05	0.000267951	26.1414
18:58696366|58700591//ENST00000345724	ENST00000378529	2588	5	25	2	hsa-miR-619-5p,hsa-miR-6506-5p	0.000880331	0.00963109	41.408
2:200419250|200419496//ENST00000358677	ENST00000378529	2588	12	25	3	hsa-miR-3173-5p,hsa-miR-6775-3p,hsa-miR-6799-3p	0.000165537	0.00256055	25.88
1:236024070|236038253//ENST00000264187	ENST00000377673	2588	68	2	2	hsa-miR-4700-3p,hsa-miR-6750-3p	0.000680492	0.00789332	38.0588
3:195306511|195336976//ENST00000439758	ENST00000254868	2588	7	17	2	hsa-miR-1254,hsa-miR-3116	0.000836792	0.00926133	43.4958
3:195306511|195336976//ENST00000326793	ENST00000254868	2588	7	17	2	hsa-miR-1254,hsa-miR-3116	0.000836792	0.00926133	43.4958
1:235793503|235801097//ENST00000389793	ENST00000254868	2588	4	17	2	hsa-miR-1288-3p,hsa-miR-4529-3p	0.000241877	0.00347606	76.1176
3:195306511|195336976//ENST00000635383	ENST00000254868	2588	7	17	2	hsa-miR-1254,hsa-miR-3116	0.000836792	0.00926133	43.4958
9:75932379|76027037//ENST00000376752	ENST00000518176	2588	11	33	3	hsa-miR-4763-3p,hsa-miR-612,hsa-miR-6860	0.000290922	0.00403265	21.3884
2:24135119|24147086//ENST00000610442	ENST00000452088	2588	7	12	2	hsa-miR-4769-5p,hsa-miR-6728-5p	0.000408722	0.00528673	61.619
2:24135119|24147086//ENST00000611127	ENST00000452088	2588	9	12	2	hsa-miR-4769-5p,hsa-miR-6728-5p	0.000697058	0.00803827	47.9259
1:204116507|204117707//ENST00000272193	ENST00000452088	2588	32	12	4	hsa-miR-4481,hsa-miR-6780b-5p,hsa-miR-6795-5p,hsa-miR-6887-5p	8.90311e-06	0.000221862	26.9583
19:39457675|39459960//ENST00000432763	ENST00000415846	2588	27	4	2	hsa-miR-6728-3p,hsa-miR-6828-3p	0.000621031	0.00735042	47.9259
10:46932377|46947955//ENST00000374339	ENST00000415846	2588	46	4	4	hsa-miR-4421,hsa-miR-5699-3p,hsa-miR-6728-3p,hsa-miR-6828-3p	8.75068e-08	3.86615e-06	56.2609
10:46932377|46947955//ENST00000466912	ENST00000415846	2588	45	4	4	hsa-miR-4421,hsa-miR-5699-3p,hsa-miR-6728-3p,hsa-miR-6828-3p	7.98975e-08	3.56473e-06	57.5111
10:46932377|46947955//ENST00000513756	ENST00000415846	2588	49	4	4	hsa-miR-4421,hsa-miR-5699-3p,hsa-miR-6728-3p,hsa-miR-6828-3p	1.13617e-07	4.88088e-06	52.8163
10:46932377|46947955//ENST00000506881	ENST00000415846	2588	85	4	4	hsa-miR-4421,hsa-miR-5699-3p,hsa-miR-6728-3p,hsa-miR-6828-3p	1.08578e-06	3.5811e-05	30.4471
1:236808704|236816543//ENST00000366577	ENST00000415846	2588	17	4	2	hsa-miR-4421,hsa-miR-5699-3p	0.000241877	0.00347606	76.1176
19:39457675|39459960//ENST00000359191	ENST00000415846	2588	27	4	2	hsa-miR-6728-3p,hsa-miR-6828-3p	0.000621031	0.00735042	47.9259
1:35470863|35479212//ENST00000325722	ENST00000336832	2588	16	36	5	hsa-miR-1249-5p,hsa-miR-22-3p,hsa-miR-6127,hsa-miR-6133,hsa-miR-6797-5p	1.52977e-06	4.83706e-05	22.4653
1:35470863|35479212//ENST00000431916	ENST00000336832	2588	13	36	5	hsa-miR-1249-5p,hsa-miR-22-3p,hsa-miR-6127,hsa-miR-6133,hsa-miR-6797-5p	4.64538e-07	1.69848e-05	27.6496
4:3186597|3189093//ENST00000355072	ENST00000336832	2588	17	36	5	hsa-miR-1249-5p,hsa-miR-4739,hsa-miR-6127,hsa-miR-6133,hsa-miR-6797-5p	2.14548e-06	6.49675e-05	21.1438
14:64107491|64121061//ENST00000344113	ENST00000391624	2588	30	15	4	hsa-miR-3153,hsa-miR-4265,hsa-miR-4296,hsa-miR-4322	1.83534e-05	0.000411299	23.0044
15:41055247|41058781//ENST00000361937	ENST00000391624	2588	7	15	2	hsa-miR-4793-5p,hsa-miR-922	0.000647724	0.00759015	49.2952
11:61271675|61274584//ENST00000301770	ENST00000391624	2588	32	15	4	hsa-miR-4265,hsa-miR-4296,hsa-miR-4322,hsa-miR-4417	2.39183e-05	0.000514373	21.5667
14:31380467|31383771//ENST00000538864	ENST00000391624	2588	8	15	2	hsa-miR-125a-3p,hsa-miR-922	0.00086074	0.00946676	43.1333
9:76067955|76071898//ENST00000376752	ENST00000431515	2588	11	22	3	hsa-miR-637,hsa-miR-6751-5p,hsa-miR-6803-5p	8.42491e-05	0.0014713	32.0826
7:137912991|137916012//ENST00000330387	ENST00000431515	2588	17	22	5	hsa-miR-4483,hsa-miR-608,hsa-miR-6751-5p,hsa-miR-6803-5p,hsa-miR-6842-5p	1.58277e-07	6.54939e-06	34.5989
2:99418828|99435941//ENST00000258428	ENST00000431515	2588	17	22	3	hsa-miR-4757-5p,hsa-miR-6751-5p,hsa-miR-6803-5p	0.000335889	0.00452468	20.7594
2:99418828|99435941//ENST00000393445	ENST00000431515	2588	17	22	3	hsa-miR-4757-5p,hsa-miR-6751-5p,hsa-miR-6803-5p	0.000335889	0.00452468	20.7594
15:92978234|92979283//ENST00000394196	ENST00000431515	2588	10	22	3	hsa-miR-4535,hsa-miR-637,hsa-miR-6751-5p	6.16116e-05	0.00113666	35.2909
3:56666260|56673725//ENST00000355628	ENST00000431515	2588	19	22	4	hsa-miR-1269a,hsa-miR-1288-3p,hsa-miR-615-5p,hsa-miR-6796-5p	1.39808e-05	0.000326308	24.7656
1:235793503|235801097//ENST00000389793	ENST00000431515	2588	4	22	2	hsa-miR-1269a,hsa-miR-1288-3p	0.000409773	0.00529872	58.8182
3:56660731|56673725//ENST00000355628	ENST00000431515	2588	20	22	4	hsa-miR-1269a,hsa-miR-1288-3p,hsa-miR-615-5p,hsa-miR-6796-5p	1.73785e-05	0.000392482	23.5273
9:111914605|111926496//ENST00000374279	ENST00000373426	2588	9	18	3	hsa-miR-3120-5p,hsa-miR-6815-5p,hsa-miR-6865-5p	2.31401e-05	0.000500372	47.9259
4:109659011|109664394//ENST00000394650	ENST00000373426	2588	5	18	2	hsa-miR-6815-5p,hsa-miR-6865-5p	0.000451416	0.00572137	57.5111
1:100913663|100921841//ENST00000357650	ENST00000373426	2588	12	18	3	hsa-miR-298,hsa-miR-3120-5p,hsa-miR-632	5.98172e-05	0.00110955	35.9444
9:111914605|111926496//ENST00000495085	ENST00000373426	2588	9	18	3	hsa-miR-3120-5p,hsa-miR-6815-5p,hsa-miR-6865-5p	2.31401e-05	0.000500372	47.9259
13:32732101|32735330//ENST00000315596	ENST00000372514	2588	2	78	2	hsa-miR-2467-3p,hsa-miR-7161-3p	0.000897066	0.00977596	33.1795
1:70292388|70306290//ENST00000262346	ENST00000312221	2588	8	2	2	hsa-miR-1231,hsa-miR-3187-5p	8.36426e-06	0.000210423	323.5
2:32098796|32116212//ENST00000315285	ENST00000307169	2588	16	31	5	hsa-miR-34a-5p,hsa-miR-34c-5p,hsa-miR-449b-5p,hsa-miR-449c-5p,hsa-miR-508-5p	7.01914e-07	2.4442e-05	26.0887
14:105252507|105272894//ENST00000327359	ENST00000307169	2588	21	31	7	hsa-miR-2682-5p,hsa-miR-34a-5p,hsa-miR-34b-5p,hsa-miR-34c-5p,hsa-miR-449b-5p,hsa-miR-449c-5p,hsa-miR-4692	1.78179e-09	1.17141e-07	27.828
1:155370504|155370983//ENST00000368346	ENST00000307169	2588	12	31	3	hsa-miR-2682-5p,hsa-miR-34b-5p,hsa-miR-4692	0.000318466	0.00433572	20.871
9:84702159|84710791//ENST00000277120	ENST00000307169	2588	10	31	4	hsa-miR-2682-5p,hsa-miR-34b-5p,hsa-miR-449c-5p,hsa-miR-4692	3.36928e-06	9.61518e-05	33.3935
11:118758774|118763306//ENST00000526070	ENST00000307169	2588	8	31	4	hsa-miR-34a-5p,hsa-miR-34c-5p,hsa-miR-449b-5p,hsa-miR-449c-5p	1.1421e-06	3.7437e-05	41.7419
2:220753613|220776862//XLOC.113846.1	ENST00000307169	2588	29	31	7	hsa-miR-2682-5p,hsa-miR-298,hsa-miR-34a-5p,hsa-miR-34b-5p,hsa-miR-34c-5p,hsa-miR-449b-5p,hsa-miR-449c-5p	2.23977e-08	1.14604e-06	20.1513
15:49235851|49239367//ENST00000327171	ENST00000307169	2588	4	31	2	hsa-miR-2682-5p,hsa-miR-449c-5p	0.000821027	0.00912983	41.7419
10:86467279|86473973//ENST00000263070	ENST00000349460	2588	22	13	4	hsa-miR-3929,hsa-miR-4632-5p,hsa-miR-6735-5p,hsa-miR-6879-5p	2.66705e-06	7.84562e-05	36.1958
6:42650284|42652645//ENST00000372899	ENST00000349460	2588	11	13	4	hsa-miR-29b-2-5p,hsa-miR-4632-5p,hsa-miR-6735-5p,hsa-miR-6879-5p	1.24078e-07	5.27718e-06	72.3916
17:82563354|82571870//ENST00000527313	ENST00000349460	2588	34	13	4	hsa-miR-4632-5p,hsa-miR-6735-5p,hsa-miR-6879-5p,hsa-miR-7843-5p	1.63493e-05	0.000372784	23.4208
1:43920404|43920928//ENST00000262915	ENST00000349460	2588	21	13	4	hsa-miR-4632-5p,hsa-miR-6864-5p,hsa-miR-6879-5p,hsa-miR-7843-5p	2.18825e-06	6.60953e-05	37.9194
7:139237005|139266403//ENST00000473989	ENST00000464451	2588	27	4	3	hsa-miR-15b-5p,hsa-miR-3127-3p,hsa-miR-497-5p	4.02637e-06	0.000112181	71.8889
12:99772922|99812311//ENST00000329257	ENST00000464451	2588	23	4	2	hsa-miR-15b-5p,hsa-miR-497-5p	0.000448567	0.00569146	56.2609
2:172960760|172967444//ENST00000397081	ENST00000464451	2588	25	4	2	hsa-miR-15b-5p,hsa-miR-497-5p	0.000531346	0.00650577	51.76
9:114633768|114638726//ENST00000288502	ENST00000464451	2588	25	4	2	hsa-miR-15b-5p,hsa-miR-497-5p	0.000531346	0.00650577	51.76
13:99539446|99552326//ENST00000376387	ENST00000464451	2588	25	4	2	hsa-miR-15b-5p,hsa-miR-497-5p	0.000531346	0.00650577	51.76
9:4860125|4860901//ENST00000381750	ENST00000464451	2588	30	4	3	hsa-miR-15b-5p,hsa-miR-16-5p,hsa-miR-497-5p	5.58383e-06	0.000148705	64.7
9:4823548|4860901//ENST00000381750	ENST00000464451	2588	68	4	3	hsa-miR-15b-5p,hsa-miR-16-5p,hsa-miR-497-5p	6.81601e-05	0.00123611	28.5441
12:99772922|99812311//ENST00000549866	ENST00000464451	2588	21	4	2	hsa-miR-15b-5p,hsa-miR-497-5p	0.000372714	0.00491467	61.619
13:101283933|101292366//ENST00000251127	ENST00000464451	2588	20	4	2	hsa-miR-15b-5p,hsa-miR-16-5p	0.000337392	0.00454099	64.7
1:219179147|219211752//ENST00000474379	ENST00000191018	2588	10	50	4	hsa-miR-30b-3p,hsa-miR-3192-5p,hsa-miR-6779-5p,hsa-miR-6780a-5p	2.37971e-05	0.000512121	20.704
1:219179147|219211752//ENST00000477938	ENST00000191018	2588	10	50	4	hsa-miR-30b-3p,hsa-miR-3192-5p,hsa-miR-6779-5p,hsa-miR-6780a-5p	2.37971e-05	0.000512121	20.704
10:110100625|110112915//ENST00000497125	ENST00000191018	2588	9	50	4	hsa-miR-30b-3p,hsa-miR-3192-5p,hsa-miR-6779-5p,hsa-miR-6780a-5p	1.44843e-05	0.000336215	23.0044
10:110100625|110112915//ENST00000277900	ENST00000191018	2588	10	50	4	hsa-miR-30b-3p,hsa-miR-3192-5p,hsa-miR-6779-5p,hsa-miR-6780a-5p	2.37971e-05	0.000512121	20.704
1:219179147|219211752//ENST00000460522	ENST00000191018	2588	10	50	4	hsa-miR-30b-3p,hsa-miR-3192-5p,hsa-miR-6779-5p,hsa-miR-6780a-5p	2.37971e-05	0.000512121	20.704
15:59671183|59680308//ENST00000267859	ENST00000373583	2588	6	21	2	hsa-miR-1200,hsa-miR-6732-3p	0.000922686	0.00999232	41.0794
9:75932379|76027037//ENST00000376752	ENST00000373583	2588	11	21	3	hsa-miR-3183,hsa-miR-432-3p,hsa-miR-4723-3p	7.29303e-05	0.00130537	33.6104
19:10904951|10909207//ENST00000589693	ENST00000373583	2588	18	21	3	hsa-miR-214-5p,hsa-miR-3183,hsa-miR-4723-3p	0.0003477	0.00465132	20.5397
9:76067955|76071898//ENST00000376752	ENST00000588262	2588	11	15	3	hsa-miR-328-5p,hsa-miR-637,hsa-miR-6848-5p	2.53009e-05	0.000539388	47.0545
20:44511289|44514040//ENST00000255175	ENST00000444486	2588	16	7	3	hsa-miR-361-3p,hsa-miR-3943,hsa-miR-6764-5p	6.69041e-06	0.000173853	69.3214
X:37386599|37426000//ENST00000449135	ENST00000368104	2588	6	35	3	hsa-miR-3689d,hsa-miR-6825-5p,hsa-miR-6855-5p	4.41116e-05	0.000860447	36.9714
11:18564892|18578808//ENST00000300038	ENST00000368104	2588	11	35	5	hsa-miR-4716-3p,hsa-miR-4723-5p,hsa-miR-5698,hsa-miR-6794-5p,hsa-miR-7111-5p	1.468e-07	6.12665e-06	33.6104
11:18564892|18578808//ENST00000320750	ENST00000368104	2588	9	35	5	hsa-miR-4716-3p,hsa-miR-4723-5p,hsa-miR-5698,hsa-miR-6794-5p,hsa-miR-7111-5p	4.08229e-08	1.95952e-06	41.0794
15:41085369|41087682//ENST00000361937	ENST00000368104	2588	13	35	4	hsa-miR-4716-3p,hsa-miR-4723-5p,hsa-miR-5698,hsa-miR-6825-5p	1.84071e-05	0.000412296	22.7516
2:205440370|205440672//ENST00000351153	ENST00000368104	2588	12	35	5	hsa-miR-4716-3p,hsa-miR-4723-5p,hsa-miR-6794-5p,hsa-miR-6870-5p,hsa-miR-7111-5p	2.49221e-07	9.8003e-06	30.8095
3:105670233|105685466//ENST00000394030	ENST00000368104	2588	33	35	9	hsa-miR-1249-5p,hsa-miR-4723-5p,hsa-miR-5698,hsa-miR-6799-5p,hsa-miR-6825-5p,hsa-miR-6870-5p,hsa-miR-6883-5p,hsa-miR-7111-5p,hsa-miR-8085	1.54494e-10	1.27529e-08	20.1662
11:47358844|47375729//ENST00000227163	ENST00000292596	2588	57	6	3	hsa-miR-1538,hsa-miR-5090,hsa-miR-6775-5p	0.000193423	0.00290707	22.7018
19:7267345|7267896//ENST00000302850	ENST00000292596	2588	15	6	2	hsa-miR-5090,hsa-miR-5587-3p	0.000464215	0.00584847	57.5111
17:64562771|64571956//ENST00000262435	ENST00000557320	2588	11	54	5	hsa-miR-3189-3p,hsa-miR-4459,hsa-miR-4695-5p,hsa-miR-650,hsa-miR-665	1.37786e-06	4.41145e-05	21.7845
4:102906536|102912129//ENST00000503584	ENST00000557320	2588	21	54	9	hsa-miR-4419a,hsa-miR-4510,hsa-miR-4701-3p,hsa-miR-4739,hsa-miR-6133,hsa-miR-650,hsa-miR-6720-5p,hsa-miR-6776-5p,hsa-miR-7106-5p	9.13151e-11	7.89914e-09	20.5397
2:159777938|159783469//ENST00000480212	ENST00000557320	2588	26	54	11	hsa-let-7d-5p,hsa-miR-1273g-3p,hsa-miR-3664-3p,hsa-miR-4459,hsa-miR-4695-5p,hsa-miR-508-5p,hsa-miR-510-5p,hsa-miR-665,hsa-miR-6720-5p,hsa-miR-6808-5p,hsa-miR-7703	6.85777e-13	8.99089e-11	20.2764
7:75199651|75202613//ENST00000614592	ENST00000395321	2588	11	34	3	hsa-miR-2276-5p,hsa-miR-665,hsa-miR-6840-3p	0.000318332	0.00433471	20.7594
4:39869394|39890364//ENST00000303538	ENST00000560722	2588	24	6	3	hsa-miR-135a-5p,hsa-miR-135b-5p,hsa-miR-6826-3p	1.37734e-05	0.000322187	53.9167
4:39874289|39890364//ENST00000303538	ENST00000560722	2588	18	6	3	hsa-miR-135a-5p,hsa-miR-135b-5p,hsa-miR-6826-3p	5.58212e-06	0.000148667	71.8889
19:11722954|11724254//ENST00000341191	ENST00000560722	2588	11	6	2	hsa-miR-135a-5p,hsa-miR-135b-5p	0.000244168	0.00350153	78.4242
1:236850344|236853088//ENST00000366576	ENST00000560722	2588	19	6	2	hsa-miR-135a-5p,hsa-miR-135b-5p	0.000752887	0.00853159	45.4035
11:8435494|8464822//ENST00000315204	ENST00000560722	2588	13	6	2	hsa-miR-135a-5p,hsa-miR-135b-5p	0.000345559	0.0046293	66.359
9:79612656|79654075//ENST00000435650	ENST00000435213	2588	38	8	3	hsa-miR-3199,hsa-miR-4647,hsa-miR-4740-5p	0.000155575	0.00243487	25.5395
1:151088190|151107222//ENST00000368918	ENST00000435213	2588	30	8	3	hsa-miR-3199,hsa-miR-4652-5p,hsa-miR-4740-5p	7.57541e-05	0.00134746	32.35
9:79612656|79654075//ENST00000376537	ENST00000435213	2588	38	8	3	hsa-miR-3199,hsa-miR-4647,hsa-miR-4740-5p	0.000155575	0.00243487	25.5395
9:79612656|79654075//ENST00000265284	ENST00000435213	2588	32	8	3	hsa-miR-3199,hsa-miR-4647,hsa-miR-4740-5p	9.2277e-05	0.00158756	30.3281
8:47407861|47440542//ENST00000297423	ENST00000283268	2588	22	23	5	hsa-miR-1249-5p,hsa-miR-149-3p,hsa-miR-4728-5p,hsa-miR-4739,hsa-miR-6797-5p	8.32668e-07	2.83959e-05	25.5731
3:4410865|4420146//ENST00000272902	ENST00000283268	2588	26	23	5	hsa-miR-1249-5p,hsa-miR-149-3p,hsa-miR-4728-5p,hsa-miR-5196-5p,hsa-miR-6797-5p	2.03189e-06	6.19353e-05	21.6388
10:12117673|12120267//ENST00000263035	ENST00000283268	2588	8	23	3	hsa-miR-4270,hsa-miR-4747-5p,hsa-miR-5196-5p	3.33836e-05	0.000681137	42.1957
20:41512846|41533570//ENST00000373222	ENST00000394834	2588	49	5	3	hsa-miR-3064-5p,hsa-miR-4268,hsa-miR-502-5p	6.21554e-05	0.00114504	31.6898
13:40940921|40941370//ENST00000239882	ENST00000394834	2588	24	5	2	hsa-miR-4268,hsa-miR-8075	0.000810534	0.00903982	43.1333
10:102023477|102029745//ENST00000370033	ENST00000394834	2588	5	5	2	hsa-miR-3064-5p,hsa-miR-8075	2.98031e-05	0.000619396	207.04
X:150727215|150737448//ENST00000488357	ENST00000394834	2588	22	5	2	hsa-miR-3064-5p,hsa-miR-502-5p	0.000679436	0.00788438	47.0545
21:34102835|34125480//ENST00000477091	ENST00000394834	2588	12	5	2	hsa-miR-3064-5p,hsa-miR-4268	0.000195637	0.00293254	86.2667
1:202750659|202758510//ENST00000235790	ENST00000394834	2588	22	5	2	hsa-miR-3064-5p,hsa-miR-8075	0.000679436	0.00788438	47.0545
X:150727215|150737448//ENST00000370390	ENST00000394834	2588	24	5	2	hsa-miR-3064-5p,hsa-miR-502-5p	0.000810534	0.00903982	43.1333
6:17507169|17513954//ENST00000229922	ENST00000595033	2588	12	45	5	hsa-miR-4632-5p,hsa-miR-4763-3p,hsa-miR-5008-5p,hsa-miR-6721-5p,hsa-miR-6879-5p	9.16786e-07	3.08985e-05	23.963
1:219179147|219211752//ENST00000474379	ENST00000389204	2588	10	38	3	hsa-miR-3192-5p,hsa-miR-6779-5p,hsa-miR-6780a-5p	0.000326653	0.00442537	20.4316
1:219179147|219211752//ENST00000477938	ENST00000389204	2588	10	38	3	hsa-miR-3192-5p,hsa-miR-6779-5p,hsa-miR-6780a-5p	0.000326653	0.00442537	20.4316
8:47407861|47440542//ENST00000297423	ENST00000389204	2588	22	38	7	hsa-miR-1249-5p,hsa-miR-149-3p,hsa-miR-4728-5p,hsa-miR-6779-5p,hsa-miR-6780a-5p,hsa-miR-6797-5p,hsa-miR-6883-5p	1.20006e-08	6.55005e-07	21.6699
10:110100625|110112915//ENST00000497125	ENST00000389204	2588	9	38	3	hsa-miR-3192-5p,hsa-miR-6779-5p,hsa-miR-6780a-5p	0.000230997	0.00335066	22.7018
3:4410865|4420146//ENST00000272902	ENST00000389204	2588	26	38	8	hsa-miR-1249-5p,hsa-miR-149-3p,hsa-miR-4728-5p,hsa-miR-5196-5p,hsa-miR-6780a-5p,hsa-miR-6785-5p,hsa-miR-6797-5p,hsa-miR-6883-5p	1.28303e-09	8.70947e-08	20.9555
10:110100625|110112915//ENST00000277900	ENST00000389204	2588	10	38	3	hsa-miR-3192-5p,hsa-miR-6779-5p,hsa-miR-6780a-5p	0.000326653	0.00442537	20.4316
1:219179147|219211752//ENST00000460522	ENST00000389204	2588	10	38	3	hsa-miR-3192-5p,hsa-miR-6779-5p,hsa-miR-6780a-5p	0.000326653	0.00442537	20.4316
8:47407861|47440542//ENST00000297423	ENST00000529930	2588	22	11	3	hsa-miR-1249-5p,hsa-miR-4728-5p,hsa-miR-6797-5p	8.42491e-05	0.0014713	32.0826
14:23033368|23033674//ENST00000334454	ENST00000529930	2588	20	11	3	hsa-miR-361-3p,hsa-miR-449b-3p,hsa-miR-4691-3p	6.26575e-05	0.00115261	35.2909
1:117460489|117502970//ENST00000356554	ENST00000529930	2588	30	11	3	hsa-miR-3130-3p,hsa-miR-449b-3p,hsa-miR-4691-3p	0.000218006	0.00319787	23.5273
3:4410865|4420146//ENST00000272902	ENST00000529930	2588	26	11	3	hsa-miR-1249-5p,hsa-miR-4728-5p,hsa-miR-6797-5p	0.000140919	0.00224512	27.1469
1:25448808|25456831//ENST00000374343	ENST00000529930	2588	11	11	2	hsa-miR-1249-5p,hsa-miR-6797-5p	0.000884943	0.00966885	42.7769
3:105670233|105685466//ENST00000394030	ENST00000529930	2588	33	11	3	hsa-miR-1249-5p,hsa-miR-4728-5p,hsa-miR-6797-5p	0.000290922	0.00403265	21.3884
X:41609904|41671530//ENST00000378154	ENST00000372841	2588	20	14	3	hsa-miR-3065-3p,hsa-miR-4448,hsa-miR-4689	0.000136191	0.00218486	27.7286
6:138945219|138947913//ENST00000258062	ENST00000372841	2588	27	14	3	hsa-miR-4667-5p,hsa-miR-4700-5p,hsa-miR-8089	0.000341692	0.00458744	20.5397
21:28986139|28986934//ENST00000361371	ENST00000372841	2588	8	14	2	hsa-miR-3065-3p,hsa-miR-4448	0.000747132	0.00847956	46.2143
14:22950314|22952683//ENST00000342454	ENST00000372841	2588	18	14	3	hsa-miR-152-5p,hsa-miR-4448,hsa-miR-6772-3p	9.81106e-05	0.00166989	30.8095
X:41609904|41671530//ENST00000421587	ENST00000372841	2588	19	14	3	hsa-miR-3065-3p,hsa-miR-4448,hsa-miR-4689	0.000116134	0.00191738	29.188
2:58198579|58232112//ENST00000402135	ENST00000372841	2588	18	14	5	hsa-miR-4667-5p,hsa-miR-4689,hsa-miR-4700-5p,hsa-miR-6858-5p,hsa-miR-8089	1.71372e-08	9.01811e-07	51.3492
8:43007847|43013400//ENST00000307602	ENST00000372841	2588	7	14	2	hsa-miR-4448,hsa-miR-6772-3p	0.000562087	0.0067979	52.8163
2:201565729|201575326//ENST00000286195	ENST00000372841	2588	6	14	2	hsa-miR-4700-5p,hsa-miR-8089	0.000402736	0.00522554	61.619
1:151638888|151668635//ENST00000368838	ENST00000372841	2588	24	14	3	hsa-miR-4700-5p,hsa-miR-6858-5p,hsa-miR-8089	0.000238722	0.00343951	23.1071
2:121503167|121530325//ENST00000263710	ENST00000372841	2588	22	14	3	hsa-miR-4667-5p,hsa-miR-4700-5p,hsa-miR-8089	0.000182804	0.00277578	25.2078
X:40588986|40597664//ENST00000636574	ENST00000413702	2588	24	12	3	hsa-miR-6751-5p,hsa-miR-6803-5p,hsa-miR-6835-5p	0.000146055	0.00231123	26.9583
X:40588986|40597664//ENST00000378438	ENST00000413702	2588	25	12	3	hsa-miR-6751-5p,hsa-miR-6803-5p,hsa-miR-6835-5p	0.000165537	0.00256055	25.88
X:40588986|40597664//ENST00000636287	ENST00000413702	2588	24	12	3	hsa-miR-6751-5p,hsa-miR-6803-5p,hsa-miR-6835-5p	0.000146055	0.00231123	26.9583
3:111913319|111920419//ENST00000393923	ENST00000413702	2588	32	12	4	hsa-miR-6730-5p,hsa-miR-6751-5p,hsa-miR-6803-5p,hsa-miR-6835-5p	8.90311e-06	0.000221862	26.9583
2:216141186|216148276//ENST00000392132	ENST00000413702	2588	8	12	3	hsa-miR-6751-5p,hsa-miR-6803-5p,hsa-miR-6835-5p	4.21399e-06	0.000116704	80.875
10:110100625|110112915//ENST00000497125	ENST00000470258	2588	9	56	4	hsa-miR-30b-3p,hsa-miR-6780a-5p,hsa-miR-7106-5p,hsa-miR-765	2.28836e-05	0.000495684	20.5397
6:75621532|75647801//ENST00000483859	ENST00000286835	2588	6	6	2	hsa-miR-584-3p,hsa-miR-6829-5p	6.69359e-05	0.00121741	143.778
6:75621532|75647801//ENST00000447266	ENST00000286835	2588	6	6	2	hsa-miR-584-3p,hsa-miR-6829-5p	6.69359e-05	0.00121741	143.778
6:75621532|75647801//ENST00000327284	ENST00000286835	2588	6	6	2	hsa-miR-584-3p,hsa-miR-6829-5p	6.69359e-05	0.00121741	143.778
7:140702866|140704963//ENST00000247866	ENST00000380701	2588	7	40	3	hsa-miR-4283,hsa-miR-4437,hsa-miR-8059	0.000114776	0.00189936	27.7286
X:73577407|73584572//ENST00000373502	ENST00000380701	2588	8	40	3	hsa-miR-23a-3p,hsa-miR-23b-3p,hsa-miR-922	0.000181673	0.00276224	24.2625
12:22482557|22506819//ENST00000545552	ENST00000612871	2588	17	19	3	hsa-miR-6819-3p,hsa-miR-6877-3p,hsa-miR-7109-3p	0.000213946	0.00314991	24.0372
11:36081653|36098461//ENST00000315571	ENST00000612871	2588	12	19	3	hsa-miR-25-3p,hsa-miR-92a-3p,hsa-miR-92b-3p	7.08471e-05	0.00127494	34.0526
1:155370504|155370983//ENST00000368346	ENST00000612871	2588	12	19	3	hsa-miR-25-3p,hsa-miR-92a-3p,hsa-miR-92b-3p	7.08471e-05	0.00127494	34.0526
12:22482557|22506819//ENST00000333957	ENST00000612871	2588	15	19	3	hsa-miR-6819-3p,hsa-miR-6877-3p,hsa-miR-7109-3p	0.000144494	0.00229133	27.2421
21:33750143|33761986//ENST00000379960	ENST00000380003	2588	18	25	4	hsa-miR-328-5p,hsa-miR-6511a-5p,hsa-miR-6511b-5p,hsa-miR-6857-3p	1.89453e-05	0.000422471	23.0044
14:92088730|92096838//ENST00000393287	ENST00000636107	2588	9	43	3	hsa-miR-4769-3p,hsa-miR-6837-3p,hsa-miR-7111-3p	0.000334973	0.00451637	20.062
14:92088730|92096838//ENST00000506466	ENST00000636107	2588	9	43	3	hsa-miR-4769-3p,hsa-miR-6837-3p,hsa-miR-7111-3p	0.000334973	0.00451637	20.062
12:22482557|22506819//ENST00000545552	ENST00000354582	2588	17	25	4	hsa-miR-1183,hsa-miR-3137,hsa-miR-665,hsa-miR-6877-3p	1.48317e-05	0.000343106	24.3576
12:22490123|22506819//ENST00000535555	ENST00000354582	2588	9	25	3	hsa-miR-1183,hsa-miR-3137,hsa-miR-665	6.443e-05	0.00117944	34.5067
12:22490123|22506819//ENST00000333957	ENST00000354582	2588	7	25	3	hsa-miR-1183,hsa-miR-3137,hsa-miR-665	2.71917e-05	0.000573139	44.3657
12:22482557|22506819//ENST00000333957	ENST00000354582	2588	15	25	4	hsa-miR-1183,hsa-miR-3137,hsa-miR-665,hsa-miR-6877-3p	8.6182e-06	0.000215822	27.6053
17:62033787|62035608//ENST00000397786	ENST00000354582	2588	4	25	2	hsa-miR-150-3p,hsa-miR-3692-3p	0.000531346	0.00650577	51.76
6:158448996|158452268//ENST00000367094	ENST00000273320	2588	19	17	5	hsa-miR-4728-5p,hsa-miR-6763-5p,hsa-miR-6785-5p,hsa-miR-6825-5p,hsa-miR-6883-5p	7.07092e-08	3.19939e-06	40.0619
11:89354962|89402542//ENST00000263317	ENST00000273320	2588	19	17	3	hsa-miR-6785-5p,hsa-miR-6883-5p,hsa-miR-892b	0.000213946	0.00314991	24.0372
15:96271703|96290783//ENST00000502125	ENST00000273320	2588	35	17	5	hsa-miR-149-5p,hsa-miR-3126-5p,hsa-miR-6834-5p,hsa-miR-6875-5p,hsa-miR-892b	1.85473e-06	5.71961e-05	21.7479
7:130170400|130181719//ENST00000473456	ENST00000273320	2588	18	17	3	hsa-miR-4728-5p,hsa-miR-6825-5p,hsa-miR-6883-5p	0.000180901	0.0027526	25.3725
15:96285326|96290783//ENST00000561344	ENST00000273320	2588	20	17	3	hsa-miR-3126-5p,hsa-miR-6834-5p,hsa-miR-6875-5p	0.000250679	0.00357646	22.8353
7:130173632|130178527//ENST00000397622	ENST00000273320	2588	20	17	3	hsa-miR-4728-5p,hsa-miR-6825-5p,hsa-miR-6883-5p	0.000250679	0.00357646	22.8353
15:96271703|96290783//ENST00000561344	ENST00000273320	2588	37	17	5	hsa-miR-149-5p,hsa-miR-3126-5p,hsa-miR-6834-5p,hsa-miR-6875-5p,hsa-miR-892b	2.47105e-06	7.34563e-05	20.5723
11:128758115|128768272//ENST00000527767	ENST00000273320	2588	21	17	3	hsa-miR-6763-5p,hsa-miR-6785-5p,hsa-miR-6883-5p	0.00029127	0.00403626	21.7479
15:96285326|96290783//ENST00000502125	ENST00000273320	2588	18	17	3	hsa-miR-3126-5p,hsa-miR-6834-5p,hsa-miR-6875-5p	0.000180901	0.0027526	25.3725
16:15776078|15786732//ENST00000300036	ENST00000603926	2588	11	46	6	hsa-miR-1233-5p,hsa-miR-1273h-5p,hsa-miR-3689a-3p,hsa-miR-3689b-3p,hsa-miR-3689c,hsa-miR-6778-5p	9.75594e-09	5.43734e-07	30.6877
16:15776078|15786732//ENST00000396324	ENST00000603926	2588	13	46	6	hsa-miR-1233-5p,hsa-miR-1273h-5p,hsa-miR-3689a-3p,hsa-miR-3689b-3p,hsa-miR-3689c,hsa-miR-6778-5p	3.52801e-08	1.71956e-06	25.9666
4:2954424|2956811//ENST00000314262	ENST00000399838	2588	9	29	3	hsa-miR-4268,hsa-miR-4691-5p,hsa-miR-6829-3p	0.000101646	0.00171877	29.7471
9:76067955|76071898//ENST00000376752	ENST00000588477	2588	11	10	2	hsa-miR-185-3p,hsa-miR-6846-5p	0.000725728	0.00829611	47.0545
9:114633768|114638726//ENST00000288502	ENST00000588477	2588	25	10	3	hsa-miR-497-5p,hsa-miR-6836-5p,hsa-miR-892b	9.14558e-05	0.00157645	31.056
7:158901739|158906091//ENST00000407559	ENST00000377083	2588	7	51	3	hsa-miR-3064-5p,hsa-miR-6504-5p,hsa-miR-6783-3p	0.000238823	0.00344067	21.7479
9:131506114|131506453//ENST00000341012	ENST00000274026	2588	8	15	2	hsa-miR-150-5p,hsa-miR-29b-3p	0.00086074	0.00946676	43.1333
X:84148042|84164387//ENST00000262752	ENST00000274026	2588	6	15	2	hsa-miR-1236-3p,hsa-miR-22-3p	0.000464215	0.00584847	57.5111
15:43756649|43763206//ENST00000300289	ENST00000425232	2588	5	23	2	hsa-miR-296-3p,hsa-miR-6823-5p	0.000743567	0.00844785	45.0087
19:34430576|34434968//ENST00000246548	ENST00000425232	2588	10	23	3	hsa-miR-1244,hsa-miR-4660,hsa-miR-6823-5p	7.07089e-05	0.00127328	33.7565
9:105721537|105748190//ENST00000374688	ENST00000425232	2588	15	23	3	hsa-miR-3927-3p,hsa-miR-6823-5p,hsa-miR-6831-5p	0.000260421	0.00368901	22.5043
13:41907586|41912168//ENST00000281496	ENST00000230173	2588	6	54	3	hsa-miR-4539,hsa-miR-623,hsa-miR-7158-3p	0.000164401	0.00254601	23.963
5:138006990|138019146//ENST00000033079	ENST00000376528	2588	20	17	3	hsa-miR-3190-3p,hsa-miR-4657,hsa-miR-6833-5p	0.000250679	0.00357646	22.8353
5:138006990|138011945//ENST00000033079	ENST00000376528	2588	10	17	3	hsa-miR-3190-3p,hsa-miR-4657,hsa-miR-6833-5p	2.74838e-05	0.000578118	45.6706
11:238998|244761//ENST00000534590	ENST00000554924	2588	12	6	2	hsa-miR-3126-5p,hsa-miR-6776-3p	0.000292699	0.00405204	71.8889
X:53217143|53218398//ENST00000375379	ENST00000554924	2588	9	6	2	hsa-miR-150-3p,hsa-miR-6776-3p	0.000160149	0.00249313	95.8519
14:39064913|39085906//ENST00000307712	ENST00000554924	2588	17	6	2	hsa-miR-150-3p,hsa-miR-6776-3p	0.000600027	0.00715399	50.7451
X:53217143|53218398//ENST00000404049	ENST00000554924	2588	10	6	2	hsa-miR-150-3p,hsa-miR-6776-3p	0.00019998	0.00298348	86.2667
9:122877471|122883379//ENST00000335387	ENST00000431387	2588	17	4	2	hsa-miR-199a-3p,hsa-miR-199b-3p	0.000241877	0.00347606	76.1176
9:33068824|33073806//ENST00000397149	ENST00000431387	2588	21	4	2	hsa-miR-199a-3p,hsa-miR-199b-3p	0.000372714	0.00491467	61.619
4:99034230|99048876//ENST00000296411	ENST00000431387	2588	18	4	2	hsa-miR-199a-3p,hsa-miR-199b-3p	0.000271971	0.00381997	71.8889
22:31258291|31260077//ENST00000331728	ENST00000522072	2588	26	4	2	hsa-miR-3619-5p,hsa-miR-761	0.000575327	0.00692807	49.7692
5:73058433|73077493//ENST00000430046	ENST00000522072	2588	29	4	2	hsa-miR-3619-5p,hsa-miR-4690-5p	0.000717598	0.00822446	44.6207
15:77052385|77056255//ENST00000267970	ENST00000522072	2588	19	4	2	hsa-miR-3619-5p,hsa-miR-761	0.00030381	0.00417402	68.1053
1:214451805|214464957//ENST00000366956	ENST00000522072	2588	39	4	3	hsa-miR-3619-5p,hsa-miR-4690-5p,hsa-miR-761	1.2536e-05	0.000297264	49.7692
15:77052385|77056255//ENST00000346495	ENST00000522072	2588	18	4	2	hsa-miR-3619-5p,hsa-miR-761	0.000271971	0.00381997	71.8889
16:70463169|70463774//ENST00000288078	ENST00000522072	2588	23	4	2	hsa-miR-4530,hsa-miR-761	0.000448567	0.00569146	56.2609
2:97144518|97187226//ENST00000420699	ENST00000522072	2588	19	4	2	hsa-miR-3619-5p,hsa-miR-761	0.00030381	0.00417402	68.1053
3:47675475|47686170//ENST00000254480	ENST00000522072	2588	21	4	2	hsa-miR-3619-5p,hsa-miR-761	0.000372714	0.00491467	61.619
3:106920966|106927994//ENST00000484698	ENST00000545172	2588	10	12	2	hsa-miR-1587,hsa-miR-3620-5p	0.000869077	0.00953846	43.1333
3:12516611|12532773//ENST00000284995	ENST00000545172	2588	13	12	3	hsa-miR-1587,hsa-miR-3620-5p,hsa-miR-4656	2.12417e-05	0.000465477	49.7692
1:204116507|204117707//ENST00000272193	ENST00000545172	2588	32	12	5	hsa-miR-1587,hsa-miR-3620-5p,hsa-miR-4481,hsa-miR-4656,hsa-miR-4745-5p	1.55657e-07	6.45366e-06	33.6979
12:12519862|12521463//ENST00000228862	ENST00000562843	2588	21	18	4	hsa-miR-1224-3p,hsa-miR-1912,hsa-miR-4691-3p,hsa-miR-4738-5p	9.12097e-06	0.000226453	27.3862
22:24302195|24313466//ENST00000314328	ENST00000342159	2588	17	27	5	hsa-miR-1909-3p,hsa-miR-4763-3p,hsa-miR-6722-3p,hsa-miR-7150,hsa-miR-764	4.75857e-07	1.73529e-05	28.1917
3:136443287|136477412//ENST00000236698	ENST00000311352	2588	10	6	2	hsa-miR-6826-3p,hsa-miR-6887-3p	0.00019998	0.00298348	86.2667
X:154789954|154792285//ENST00000369534	ENST00000371488	2588	16	23	3	hsa-miR-1207-5p,hsa-miR-4763-3p,hsa-miR-6721-5p	0.000318661	0.00433753	21.0978
6:17507169|17513954//ENST00000229922	ENST00000371488	2588	12	23	3	hsa-miR-1207-5p,hsa-miR-4763-3p,hsa-miR-6721-5p	0.000128134	0.00207726	28.1304
4:109530289|109531522//ENST00000265175	ENST00000371110	2588	12	32	3	hsa-miR-4510,hsa-miR-6127,hsa-miR-6720-5p	0.000350489	0.00468078	20.2188
14:90676523|90689712//ENST00000328459	ENST00000283905	2588	20	4	2	hsa-miR-23b-5p,hsa-miR-4691-5p	0.000337392	0.00454099	64.7
8:21974670|21980203//ENST00000252512	ENST00000253496	2588	13	10	3	hsa-miR-1249-5p,hsa-miR-6797-5p,hsa-miR-6891-5p	1.16539e-05	0.000279363	59.7231
13:23590150|23626792//ENST00000248484	ENST00000253496	2588	20	10	3	hsa-miR-5581-3p,hsa-miR-6872-3p,hsa-miR-6891-5p	4.57949e-05	0.000887411	38.82
14:22950314|22952683//ENST00000342454	ENST00000253496	2588	18	10	3	hsa-miR-5581-3p,hsa-miR-6872-3p,hsa-miR-6891-5p	3.29135e-05	0.000672924	43.1333
14:22950314|22952683//ENST00000206474	ENST00000253496	2588	29	10	3	hsa-miR-5581-3p,hsa-miR-6872-3p,hsa-miR-6891-5p	0.000144114	0.00228688	26.7724
19:8468774|8474244//ENST00000600092	ENST00000253496	2588	12	10	3	hsa-miR-1249-5p,hsa-miR-6797-5p,hsa-miR-6872-3p	8.98285e-06	0.000223529	64.7
1:25448808|25456831//ENST00000374343	ENST00000253496	2588	11	10	2	hsa-miR-1249-5p,hsa-miR-6797-5p	0.000725728	0.00829611	47.0545
10:26759062|26770345//ENST00000346832	ENST00000253496	2588	37	10	3	hsa-miR-1249-5p,hsa-miR-6797-5p,hsa-miR-6891-5p	0.00030148	0.00414905	20.9838
19:8468774|8474244//ENST00000325495	ENST00000253496	2588	13	10	3	hsa-miR-1249-5p,hsa-miR-6797-5p,hsa-miR-6872-3p	1.16539e-05	0.000279363	59.7231
1:35470863|35479212//ENST00000431916	ENST00000638435	2588	13	26	3	hsa-miR-22-3p,hsa-miR-518c-5p,hsa-miR-6861-5p	0.000241014	0.00346688	22.9704
1:25448808|25456831//ENST00000374343	ENST00000276974	2588	11	27	3	hsa-miR-1273d,hsa-miR-518c-5p,hsa-miR-6797-5p	0.000158164	0.00246781	26.1414
2:97144518|97187226//ENST00000420699	ENST00000276974	2588	19	27	4	hsa-miR-3667-3p,hsa-miR-6851-5p,hsa-miR-6858-5p,hsa-miR-761	3.27689e-05	0.00067042	20.1793
4:87438277|87454455//ENST00000302174	ENST00000608525	2588	14	14	3	hsa-miR-15a-3p,hsa-miR-331-3p,hsa-miR-6791-5p	4.43289e-05	0.000863953	39.6122
7:140702866|140704963//ENST00000247866	ENST00000608525	2588	7	14	2	hsa-miR-4283,hsa-miR-4437	0.000562087	0.0067979	52.8163
17:50736960|50741731//ENST00000240304	ENST00000608525	2588	5	14	2	hsa-miR-4640-5p,hsa-miR-4726-5p	0.000269324	0.00379063	73.9429
2:74304489|74315025//ENST00000346834	ENST00000608525	2588	25	14	5	hsa-miR-1225-5p,hsa-miR-4292,hsa-miR-4640-5p,hsa-miR-4726-5p,hsa-miR-6791-5p	1.04118e-07	4.51604e-06	36.9714
12:100922226|100942535//ENST00000392977	ENST00000317442	2588	13	4	2	hsa-miR-3185,hsa-miR-3692-5p	0.000139011	0.00222093	99.5385
19:9652953|9660874//ENST00000590155	ENST00000317442	2588	29	4	2	hsa-miR-1254,hsa-miR-370-3p	0.000717598	0.00822446	44.6207
11:111836165|111838378//ENST00000398006	ENST00000317442	2588	11	4	2	hsa-miR-3185,hsa-miR-3692-5p	9.81218e-05	0.00166989	117.636
2:232806491|232812491//ENST00000373563	ENST00000317442	2588	25	4	2	hsa-miR-3185,hsa-miR-3692-5p	0.000531346	0.00650577	51.76
2:88182699|88183073//ENST00000324166	ENST00000317442	2588	11	4	2	hsa-miR-3692-5p,hsa-miR-370-3p	9.81218e-05	0.00166989	117.636
5:134741063|134744052//ENST00000297156	ENST00000317442	2588	12	4	2	hsa-miR-3692-5p,hsa-miR-370-3p	0.000117685	0.00193816	107.833
11:111836165|111838399//ENST00000531154	ENST00000317442	2588	11	4	2	hsa-miR-3185,hsa-miR-3692-5p	9.81218e-05	0.00166989	117.636
3:179413412|179419505//ENST00000232564	ENST00000317442	2588	20	4	2	hsa-miR-1254,hsa-miR-3692-5p	0.000337392	0.00454099	64.7
19:9652953|9660874//ENST00000293648	ENST00000317442	2588	21	4	2	hsa-miR-1254,hsa-miR-370-3p	0.000372714	0.00491467	61.619
19:34490376|34495771//ENST00000585928	ENST00000317442	2588	31	4	2	hsa-miR-3692-5p,hsa-miR-370-3p	0.000821027	0.00912983	41.7419
12:64062917|64065219//ENST00000355086	ENST00000317442	2588	23	4	2	hsa-miR-1254,hsa-miR-3692-5p	0.000448567	0.00569146	56.2609
19:9652953|9660874//ENST00000585688	ENST00000317442	2588	26	4	2	hsa-miR-1254,hsa-miR-370-3p	0.000575327	0.00692807	49.7692
19:9652953|9660874//ENST00000453372	ENST00000317442	2588	29	4	2	hsa-miR-1254,hsa-miR-370-3p	0.000717598	0.00822446	44.6207
1:204116507|204117707//ENST00000272193	ENST00000317442	2588	32	4	2	hsa-miR-3692-5p,hsa-miR-370-3p	0.000875308	0.00959204	40.4375
8:47407861|47440542//ENST00000297423	ENST00000296839	2588	22	32	6	hsa-miR-1249-5p,hsa-miR-149-3p,hsa-miR-4728-5p,hsa-miR-6797-5p,hsa-miR-6883-5p,hsa-miR-765	1.41839e-07	5.9438e-06	22.0568
3:4410865|4420146//ENST00000272902	ENST00000296839	2588	26	32	7	hsa-miR-1249-5p,hsa-miR-149-3p,hsa-miR-4728-5p,hsa-miR-5196-5p,hsa-miR-6785-5p,hsa-miR-6797-5p,hsa-miR-6883-5p	1.23036e-08	6.69656e-07	21.774
2:9318524|9327911//ENST00000281419	ENST00000296839	2588	8	32	3	hsa-miR-3137,hsa-miR-4747-5p,hsa-miR-5196-5p	9.2277e-05	0.00158756	30.3281
1:25448808|25456831//ENST00000374343	ENST00000296839	2588	11	32	3	hsa-miR-1249-5p,hsa-miR-140-3p,hsa-miR-6797-5p	0.000265093	0.00374343	22.0568
9:76067955|76071898//ENST00000376752	ENST00000418233	2588	11	43	4	hsa-miR-328-5p,hsa-miR-637,hsa-miR-6846-5p,hsa-miR-6848-5p	2.00594e-05	0.000443581	21.8858
4:2954424|2956811//ENST00000314262	ENST00000418233	2588	9	43	3	hsa-miR-4268,hsa-miR-4691-5p,hsa-miR-6829-3p	0.000334973	0.00451637	20.062
6:73479732|73480805//ENST00000415228	ENST00000623787	2588	13	5	2	hsa-miR-3936,hsa-miR-6830-5p	0.000231028	0.00335067	79.6308
6:73479732|73480805//ENST00000370308	ENST00000623787	2588	14	5	2	hsa-miR-3936,hsa-miR-6830-5p	0.000269324	0.00379063	73.9429
5:74813840|74841679//ENST00000510609	ENST00000581518	2588	11	33	5	hsa-miR-106a-5p,hsa-miR-106b-5p,hsa-miR-17-5p,hsa-miR-20a-5p,hsa-miR-20b-5p	1.07744e-07	4.65751e-06	35.6474
5:108946130|108959347//ENST00000281092	ENST00000581518	2588	19	33	6	hsa-miR-106a-5p,hsa-miR-106b-5p,hsa-miR-17-5p,hsa-miR-20a-5p,hsa-miR-20b-5p,hsa-miR-93-5p	6.44229e-08	2.9446e-06	24.7656
5:74834426|74841679//ENST00000389156	ENST00000581518	2588	12	33	5	hsa-miR-106a-5p,hsa-miR-106b-5p,hsa-miR-17-5p,hsa-miR-20a-5p,hsa-miR-20b-5p	1.83035e-07	7.4521e-06	32.6768
5:74813840|74841679//ENST00000389156	ENST00000581518	2588	14	33	5	hsa-miR-106a-5p,hsa-miR-106b-5p,hsa-miR-17-5p,hsa-miR-20a-5p,hsa-miR-20b-5p	4.54347e-07	1.66575e-05	28.0087
2:202811746|202821481//ENST00000358299	ENST00000581518	2588	15	33	4	hsa-miR-106b-5p,hsa-miR-1271-3p,hsa-miR-17-5p,hsa-miR-20a-5p	2.71242e-05	0.000571912	20.9131
5:81092801|81127163//ENST00000265080	ENST00000405123	2588	56	2	2	hsa-miR-194-3p,hsa-miR-216a-3p	0.000460034	0.0058062	46.2143
19:8468774|8474244//ENST00000600092	ENST00000407008	2588	12	24	3	hsa-miR-4459,hsa-miR-4667-3p,hsa-miR-6887-3p	0.000146055	0.00231123	26.9583
19:8468774|8474244//ENST00000325495	ENST00000407008	2588	13	24	4	hsa-miR-4459,hsa-miR-4667-3p,hsa-miR-4749-3p,hsa-miR-6887-3p	3.8526e-06	0.000107986	33.1795
2:159777938|159783469//ENST00000480212	ENST00000407008	2588	26	24	5	hsa-let-7b-5p,hsa-let-7c-5p,hsa-miR-3664-3p,hsa-miR-4459,hsa-miR-665	2.54917e-06	7.54612e-05	20.7372
3:15217425|15220981//ENST00000253693	ENST00000603380	2588	10	6	2	hsa-miR-6500-3p,hsa-miR-6830-5p	0.00019998	0.00298348	86.2667
3:50105549|50107569//ENST00000464087	ENST00000603380	2588	16	6	2	hsa-miR-3200-5p,hsa-miR-6847-5p	0.000529983	0.00649161	53.9167
6:169762429|169769713//ENST00000366772	ENST00000603380	2588	10	6	2	hsa-miR-3200-5p,hsa-miR-6830-5p	0.00019998	0.00298348	86.2667
6:169762429|169769713//ENST00000588451	ENST00000603380	2588	10	6	2	hsa-miR-3200-5p,hsa-miR-6830-5p	0.00019998	0.00298348	86.2667
3:50105549|50107569//ENST00000347869	ENST00000603380	2588	14	6	2	hsa-miR-3200-5p,hsa-miR-6847-5p	0.000402736	0.00522554	61.619
10:13291831|13295606//ENST00000263038	ENST00000375608	2588	8	22	3	hsa-miR-3175,hsa-miR-6777-5p,hsa-miR-6889-5p	2.90716e-05	0.000606305	44.1136
3:100885536|100902686//ENST00000284322	ENST00000472174	2588	14	30	4	hsa-miR-3940-5p,hsa-miR-6134,hsa-miR-6851-5p,hsa-miR-6880-5p	1.35684e-05	0.000318032	24.6476
1:235793503|235801097//ENST00000389793	ENST00000472174	2588	4	30	2	hsa-miR-1269a,hsa-miR-1288-3p	0.000768456	0.00867188	43.1333
1:11068008|11076948//ENST00000304457	ENST00000463201	2588	14	11	3	hsa-miR-3189-3p,hsa-miR-370-3p,hsa-miR-939-3p	2.02879e-05	0.000447789	50.4156
1:11068008|11076948//ENST00000376936	ENST00000463201	2588	19	11	3	hsa-miR-3189-3p,hsa-miR-370-3p,hsa-miR-939-3p	5.33831e-05	0.00100921	37.1483
1:11068008|11076948//ENST00000474216	ENST00000463201	2588	20	11	3	hsa-miR-3189-3p,hsa-miR-370-3p,hsa-miR-939-3p	6.26575e-05	0.00115261	35.2909
10:60084602|60088358//ENST00000280772	ENST00000463201	2588	20	11	3	hsa-miR-1908-5p,hsa-miR-3141,hsa-miR-6787-5p	6.26575e-05	0.00115261	35.2909
17:78086503|78087093//ENST00000301624	ENST00000463201	2588	28	11	3	hsa-miR-1908-5p,hsa-miR-661,hsa-miR-6787-5p	0.000176731	0.00270163	25.2078
9:79612656|79654075//ENST00000265284	ENST00000463201	2588	32	11	3	hsa-miR-1207-5p,hsa-miR-3122,hsa-miR-4298	0.000265093	0.00374343	22.0568
3:195306511|195336976//ENST00000439758	ENST00000543356	2588	7	16	2	hsa-miR-1254,hsa-miR-6792-5p	0.000739301	0.00841095	46.2143
3:195306511|195336976//ENST00000326793	ENST00000543356	2588	7	16	2	hsa-miR-1254,hsa-miR-6792-5p	0.000739301	0.00841095	46.2143
3:195306511|195336976//ENST00000635383	ENST00000543356	2588	7	16	2	hsa-miR-1254,hsa-miR-6792-5p	0.000739301	0.00841095	46.2143
3:41224021|41227352//ENST00000349496	ENST00000579687	2588	36	10	3	hsa-miR-4685-5p,hsa-miR-4689,hsa-miR-5190	0.000277603	0.00388406	21.5667
9:125341177|125346941//ENST00000394083	ENST00000579687	2588	9	10	2	hsa-miR-3157-5p,hsa-miR-5001-5p	0.000476988	0.00597324	57.5111
9:125341177|125346941//ENST00000297933	ENST00000579687	2588	8	10	2	hsa-miR-3157-5p,hsa-miR-5001-5p	0.000371758	0.00490455	64.7
16:53469916|53470922//ENST00000262133	ENST00000579687	2588	35	10	3	hsa-miR-4685-5p,hsa-miR-5001-5p,hsa-miR-6071	0.00025499	0.00362802	22.1829
12:22490123|22506819//ENST00000535555	ENST00000370832	2588	9	35	3	hsa-miR-665,hsa-miR-6808-5p,hsa-miR-766-5p	0.000180163	0.00274359	24.6476
15:85113873|85115487//ENST00000310298	ENST00000370832	2588	7	35	3	hsa-miR-203a-5p,hsa-miR-3187-5p,hsa-miR-6860	7.64792e-05	0.0013586	31.6898
12:106842589|106851594//ENST00000355478	ENST00000370832	2588	11	35	3	hsa-miR-3187-5p,hsa-miR-612,hsa-miR-6860	0.000347364	0.00464854	20.1662
10:119838535|119842595//ENST00000360003	ENST00000370832	2588	9	35	3	hsa-miR-3187-5p,hsa-miR-612,hsa-miR-6860	0.000180163	0.00274359	24.6476
17:64562771|64571956//ENST00000262435	ENST00000370832	2588	11	35	3	hsa-miR-4459,hsa-miR-4695-5p,hsa-miR-665	0.000347364	0.00464854	20.1662
12:98773042|98801125//ENST00000333732	ENST00000370832	2588	11	35	3	hsa-miR-1285-3p,hsa-miR-3187-5p,hsa-miR-6860	0.000347364	0.00464854	20.1662
12:98773042|98801125//ENST00000547362	ENST00000370832	2588	10	35	3	hsa-miR-1285-3p,hsa-miR-3187-5p,hsa-miR-6860	0.00025499	0.00362802	22.1829
7:75199651|75202613//ENST00000614592	ENST00000370832	2588	11	35	3	hsa-miR-4459,hsa-miR-4695-5p,hsa-miR-665	0.000347364	0.00464854	20.1662
13:45411362|45411938//ENST00000310862	ENST00000370832	2588	9	35	3	hsa-miR-1285-3p,hsa-miR-3187-5p,hsa-miR-6860	0.000180163	0.00274359	24.6476
2:159777938|159783469//ENST00000480212	ENST00000370832	2588	26	35	9	hsa-miR-1273e,hsa-miR-1827,hsa-miR-4421,hsa-miR-4459,hsa-miR-4695-5p,hsa-miR-665,hsa-miR-6808-5p,hsa-miR-6884-5p,hsa-miR-7703	1.33455e-11	1.36624e-09	25.5956
4:6996325|7004924//ENST00000409757	ENST00000262146	2588	16	7	2	hsa-miR-3663-3p,hsa-miR-4436b-5p	0.000739301	0.00841095	46.2143
11:18564892|18578808//ENST00000320750	ENST00000325207	2588	9	57	4	hsa-miR-4723-5p,hsa-miR-5698,hsa-miR-7111-5p,hsa-miR-939-5p	2.4572e-05	0.000526235	20.1793
8:17989859|17993619//ENST00000519253	ENST00000496292	2588	9	10	2	hsa-miR-634,hsa-miR-8077	0.000476988	0.00597324	57.5111
8:17989859|17993619//ENST00000325083	ENST00000496292	2588	10	10	2	hsa-miR-634,hsa-miR-8077	0.000595005	0.00710843	51.76
X:32216916|32310276//ENST00000357033	ENST00000269814	2588	7	56	4	hsa-miR-30c-1-3p,hsa-miR-30c-2-3p,hsa-miR-6731-5p,hsa-miR-8085	6.56599e-06	0.000171044	26.4082
X:32287529|32310276//ENST00000357033	ENST00000269814	2588	7	56	4	hsa-miR-30c-1-3p,hsa-miR-30c-2-3p,hsa-miR-6731-5p,hsa-miR-8085	6.56599e-06	0.000171044	26.4082
6:163455279|163478896//ENST00000275262	ENST00000605863	2588	3	17	2	hsa-miR-3909,hsa-miR-6715b-5p	0.000121408	0.00198857	101.49
11:3768581|3776021//ENST00000324932	ENST00000605863	2588	22	17	3	hsa-miR-134-3p,hsa-miR-4265,hsa-miR-6827-5p	0.000335889	0.00452468	20.7594
6:163455279|163478896//ENST00000545346	ENST00000605863	2588	6	17	2	hsa-miR-3909,hsa-miR-6715b-5p	0.000600027	0.00715399	50.7451
12:22490123|22506819//ENST00000535555	ENST00000404953	2588	9	48	4	hsa-miR-3177-5p,hsa-miR-665,hsa-miR-6808-5p,hsa-miR-6893-5p	1.22761e-05	0.000292081	23.963
11:18564892|18578808//ENST00000300038	ENST00000439122	2588	11	27	3	hsa-miR-4716-3p,hsa-miR-5698,hsa-miR-7111-5p	0.000158164	0.00246781	26.1414
11:18564892|18578808//ENST00000320750	ENST00000439122	2588	9	27	3	hsa-miR-4716-3p,hsa-miR-5698,hsa-miR-7111-5p	8.16519e-05	0.00143467	31.9506
2:205440370|205440672//ENST00000351153	ENST00000439122	2588	12	27	3	hsa-miR-4716-3p,hsa-miR-6870-5p,hsa-miR-7111-5p	0.000209419	0.00309688	23.963
21:28986139|28986934//ENST00000361371	ENST00000483029	2588	8	18	4	hsa-miR-29a-3p,hsa-miR-29b-3p,hsa-miR-29c-3p,hsa-miR-3065-3p	1.12884e-07	4.85332e-06	71.8889
9:131506114|131506453//ENST00000341012	ENST00000483029	2588	8	18	3	hsa-miR-29a-3p,hsa-miR-29b-3p,hsa-miR-29c-3p	1.54942e-05	0.000356273	53.9167
18:10855353|10857211//ENST00000302079	ENST00000402249	2588	12	4	2	hsa-miR-593-5p,hsa-miR-922	0.000117685	0.00193816	107.833
10:92111076|92181019//ENST00000265997	ENST00000623326	2588	5	70	3	hsa-miR-6778-5p,hsa-miR-6878-5p,hsa-miR-92a-2-5p	0.0001824	0.0027712	22.1829
7:74705164|74718941//ENST00000614986	ENST00000315396	2588	5	60	3	hsa-miR-1270,hsa-miR-6762-5p,hsa-miR-6864-5p	0.0001147	0.00189832	25.88
3:98768430|98773983//ENST00000394162	ENST00000570117	2588	10	12	2	hsa-miR-3916,hsa-miR-6859-5p	0.000869077	0.00953846	43.1333
19:34430576|34434968//ENST00000246548	ENST00000570117	2588	10	12	2	hsa-miR-3916,hsa-miR-6859-5p	0.000869077	0.00953846	43.1333
12:45931506|45934505//ENST00000369367	ENST00000570117	2588	5	12	2	hsa-miR-3916,hsa-miR-4476	0.000195637	0.00293254	86.2667
2:175080660|175121540//ENST00000409437	ENST00000570117	2588	32	12	3	hsa-miR-3916,hsa-miR-4476,hsa-miR-6859-5p	0.000350489	0.00468078	20.2188
8:140879471|140890769//ENST00000340930	ENST00000409200	2588	17	26	4	hsa-miR-5572,hsa-miR-6765-5p,hsa-miR-6769b-5p,hsa-miR-770-5p	1.74576e-05	0.000394009	23.4208
19:10637644|10638315//ENST00000591194	ENST00000409200	2588	16	26	4	hsa-miR-3185,hsa-miR-6748-5p,hsa-miR-6769a-5p,hsa-miR-6769b-5p	1.34416e-05	0.000315543	24.8846
4:109530289|109531522//ENST00000265175	ENST00000409200	2588	12	26	3	hsa-miR-4510,hsa-miR-6127,hsa-miR-6129	0.000186639	0.00282301	24.8846
19:10637644|10638315//ENST00000335757	ENST00000409200	2588	18	26	4	hsa-miR-3185,hsa-miR-6748-5p,hsa-miR-6769a-5p,hsa-miR-6769b-5p	2.22926e-05	0.000484944	22.1197
18:10855353|10857211//ENST00000302079	ENST00000356200	2588	12	6	2	hsa-miR-151a-5p,hsa-miR-151b	0.000292699	0.00405204	71.8889
14:39064913|39085906//ENST00000307712	ENST00000356200	2588	17	6	2	hsa-miR-4660,hsa-miR-766-3p	0.000600027	0.00715399	50.7451
10:110100625|110112915//ENST00000497125	ENST00000615126	2588	9	37	4	hsa-miR-6779-5p,hsa-miR-6780a-5p,hsa-miR-7106-5p,hsa-miR-765	4.23914e-06	0.000117313	31.0871
10:110100625|110112915//ENST00000277900	ENST00000615126	2588	10	37	4	hsa-miR-6779-5p,hsa-miR-6780a-5p,hsa-miR-7106-5p,hsa-miR-765	6.99309e-06	0.000180476	27.9784
1:236032401|236038253//ENST00000264187	ENST00000504102	2588	19	16	3	hsa-miR-4726-5p,hsa-miR-6762-3p,hsa-miR-6762-5p	0.000177013	0.00270488	25.5395
11:125602303|125604247//ENST00000392708	ENST00000504102	2588	23	16	3	hsa-miR-3157-5p,hsa-miR-4726-5p,hsa-miR-6762-5p	0.000318661	0.00433753	21.0978
11:68759569|68761687//ENST00000265641	ENST00000162749	2588	17	30	5	hsa-miR-1266-5p,hsa-miR-1910-3p,hsa-miR-4518,hsa-miR-5194,hsa-miR-6511a-5p	8.30224e-07	2.83219e-05	25.3725
1:204112915|204114605//ENST00000367203	ENST00000335094	2588	49	5	5	hsa-miR-1538,hsa-miR-4292,hsa-miR-4745-3p,hsa-miR-4747-3p,hsa-miR-6791-5p	1.97862e-09	1.28823e-07	52.8163
8:47777686|47785317//ENST00000314191	ENST00000335094	2588	50	5	3	hsa-miR-1538,hsa-miR-4747-3p,hsa-miR-6791-5p	6.60839e-05	0.00120436	31.056
1:236850344|236853088//ENST00000366576	ENST00000335094	2588	19	5	2	hsa-miR-1538,hsa-miR-4747-3p	0.000504132	0.00624037	54.4842
2:74304489|74315025//ENST00000346834	ENST00000335094	2588	25	5	2	hsa-miR-4292,hsa-miR-6791-5p	0.000880331	0.00963109	41.408
10:12117673|12120267//ENST00000263035	ENST00000569433	2588	8	34	3	hsa-miR-361-3p,hsa-miR-4747-5p,hsa-miR-5196-5p	0.000111003	0.0018481	28.5441
6:42650284|42652645//ENST00000372899	ENST00000356805	2588	11	30	3	hsa-miR-4632-5p,hsa-miR-6735-5p,hsa-miR-6879-5p	0.000218006	0.00319787	23.5273
6:17507169|17513954//ENST00000229922	ENST00000356805	2588	12	30	3	hsa-miR-4632-5p,hsa-miR-6721-5p,hsa-miR-6879-5p	0.000288402	0.00400612	21.5667
13:32732101|32735330//ENST00000315596	ENST00000314673	2588	2	1	1	hsa-miR-7161-3p	0.000772798	0.00870869	1294
12:22482557|22506819//ENST00000545552	ENST00000374768	2588	17	7	3	hsa-miR-3137,hsa-miR-6808-5p,hsa-miR-6893-5p	8.11462e-06	0.000205039	65.2437
12:22490123|22506819//ENST00000535555	ENST00000374768	2588	9	7	3	hsa-miR-3137,hsa-miR-6808-5p,hsa-miR-6893-5p	1.01177e-06	3.36824e-05	123.238
5:157359005|157361598//ENST00000435847	ENST00000374768	2588	29	7	3	hsa-miR-5090,hsa-miR-6727-5p,hsa-miR-6775-5p	4.2998e-05	0.000842453	38.2463
19:10904951|10909207//ENST00000590699	ENST00000374768	2588	36	7	3	hsa-miR-650,hsa-miR-6808-5p,hsa-miR-6893-5p	8.33344e-05	0.0014582	30.8095
3:125313308|125315053//ENST00000485866	ENST00000374768	2588	28	7	3	hsa-miR-3137,hsa-miR-6808-5p,hsa-miR-6893-5p	3.8595e-05	0.000769587	39.6122
13:101283933|101292366//ENST00000251127	ENST00000374768	2588	20	7	3	hsa-miR-650,hsa-miR-6808-5p,hsa-miR-6893-5p	1.35564e-05	0.000317784	55.4571
2:32098796|32116212//ENST00000315285	ENST00000423064	2588	16	19	3	hsa-miR-34c-5p,hsa-miR-449b-5p,hsa-miR-449c-5p	0.000177013	0.00270488	25.5395
2:241407537|241431774//ENST00000264042	ENST00000423064	2588	17	19	4	hsa-miR-1236-3p,hsa-miR-2682-5p,hsa-miR-449b-5p,hsa-miR-449c-5p	4.6561e-06	0.000127213	32.0495
11:118754705|118758902//ENST00000526070	ENST00000423064	2588	17	19	3	hsa-miR-34c-5p,hsa-miR-449b-5p,hsa-miR-449c-5p	0.000213946	0.00314991	24.0372
14:105252507|105272894//ENST00000327359	ENST00000423064	2588	21	19	6	hsa-miR-2682-5p,hsa-miR-34b-5p,hsa-miR-34c-5p,hsa-miR-449b-5p,hsa-miR-449c-5p,hsa-miR-4692	3.32534e-09	2.05908e-07	38.9173
1:155370504|155370983//ENST00000368346	ENST00000423064	2588	12	19	3	hsa-miR-2682-5p,hsa-miR-34b-5p,hsa-miR-4692	7.08471e-05	0.00127494	34.0526
2:205440370|205440672//ENST00000351153	ENST00000423064	2588	12	19	3	hsa-miR-1273f,hsa-miR-4716-3p,hsa-miR-6794-5p	7.08471e-05	0.00127494	34.0526
9:84702159|84710791//ENST00000277120	ENST00000423064	2588	10	19	4	hsa-miR-2682-5p,hsa-miR-34b-5p,hsa-miR-449c-5p,hsa-miR-4692	4.24455e-07	1.56838e-05	54.4842
5:84060300|84066606//ENST00000296591	ENST00000423064	2588	24	19	4	hsa-miR-2115-5p,hsa-miR-2682-5p,hsa-miR-449b-5p,hsa-miR-449c-5p	2.01204e-05	0.000444614	22.7018
11:118758774|118763306//ENST00000526070	ENST00000423064	2588	8	19	3	hsa-miR-34c-5p,hsa-miR-449b-5p,hsa-miR-449c-5p	1.83726e-05	0.000411657	51.0789
2:220753613|220776862//XLOC.113846.1	ENST00000423064	2588	29	19	5	hsa-miR-2682-5p,hsa-miR-34b-5p,hsa-miR-34c-5p,hsa-miR-449b-5p,hsa-miR-449c-5p	1.285e-06	4.14918e-05	23.4846
15:49235851|49239367//ENST00000327171	ENST00000423064	2588	4	19	2	hsa-miR-2682-5p,hsa-miR-449c-5p	0.00030381	0.00417402	68.1053
9:76067955|76071898//ENST00000376752	ENST00000395640	2588	11	3	2	hsa-miR-6846-5p,hsa-miR-6848-5p	4.9175e-05	0.000942669	156.848
5:32414969|32417792//ENST00000265069	ENST00000395640	2588	30	3	2	hsa-miR-6846-5p,hsa-miR-6848-5p	0.00038702	0.00505893	57.5111
9:76067955|76134212//ENST00000376752	ENST00000395640	2588	33	3	2	hsa-miR-6846-5p,hsa-miR-6848-5p	0.000469396	0.00589834	52.2828
9:79612656|79654075//ENST00000435650	ENST00000395640	2588	38	3	2	hsa-miR-6846-5p,hsa-miR-6848-5p	0.000624161	0.00738206	45.4035
19:40623604|40624082//ENST00000204005	ENST00000395640	2588	23	3	2	hsa-miR-6846-5p,hsa-miR-6848-5p	0.000225504	0.00328556	75.0145
6:70475410|70502791//ENST00000393299	ENST00000395640	2588	23	3	3	hsa-miR-4489,hsa-miR-6846-5p,hsa-miR-6848-5p	6.13735e-07	2.17187e-05	112.522
X:6029280|6151771//ENST00000275857	ENST00000395640	2588	43	3	2	hsa-miR-6846-5p,hsa-miR-6848-5p	0.000800688	0.00895293	40.124
6:70475410|70502791//ENST00000361499	ENST00000395640	2588	21	3	3	hsa-miR-4489,hsa-miR-6846-5p,hsa-miR-6848-5p	4.60907e-07	1.68686e-05	123.238
9:79612656|79654075//ENST00000376537	ENST00000395640	2588	38	3	2	hsa-miR-6846-5p,hsa-miR-6848-5p	0.000624161	0.00738206	45.4035
9:79612656|79654075//ENST00000265284	ENST00000395640	2588	32	3	2	hsa-miR-6846-5p,hsa-miR-6848-5p	0.000441063	0.00561496	53.9167
9:137564434|137565154//ENST00000479650	ENST00000395640	2588	32	3	2	hsa-miR-6846-5p,hsa-miR-6848-5p	0.000441063	0.00561496	53.9167
9:126381064|126395697//ENST00000361171	ENST00000395640	2588	35	3	2	hsa-miR-6846-5p,hsa-miR-6848-5p	0.000528685	0.00647963	49.2952
8:39136657|39160965//ENST00000379907	ENST00000258499	2588	7	13	2	hsa-miR-4658,hsa-miR-574-5p	0.000482411	0.00602409	56.8791
3:106920966|106927994//ENST00000484698	ENST00000370978	2588	10	50	4	hsa-miR-4459,hsa-miR-4722-5p,hsa-miR-6799-5p,hsa-miR-7154-3p	2.37971e-05	0.000512121	20.704
1:235793503|235801097//ENST00000389793	ENST00000370978	2588	4	50	3	hsa-miR-1269a,hsa-miR-1269b,hsa-miR-1288-3p	2.67988e-05	0.000566173	38.82
12:31701863|31709425//ENST00000281471	ENST00000370978	2588	7	50	3	hsa-miR-1273h-5p,hsa-miR-4722-5p,hsa-miR-6780a-5p	0.000225038	0.00328046	22.1829
8:25332251|25336373//ENST00000276440	ENST00000368830	2588	7	13	2	hsa-miR-3192-5p,hsa-miR-6845-3p	0.000482411	0.00602409	56.8791
10:110100625|110112915//ENST00000497125	ENST00000368830	2588	9	13	2	hsa-miR-3192-5p,hsa-miR-6842-3p	0.000822309	0.00913863	44.2393
8:25332251|25336373//ENST00000467709	ENST00000368830	2588	7	13	2	hsa-miR-3192-5p,hsa-miR-6845-3p	0.000482411	0.00602409	56.8791
9:96827080|96852005//ENST00000466833	ENST00000545043	2588	6	19	2	hsa-miR-6731-5p,hsa-miR-8085	0.000752887	0.00853159	45.4035
12:99772922|99812311//ENST00000329257	ENST00000545043	2588	23	19	4	hsa-miR-15a-5p,hsa-miR-15b-5p,hsa-miR-4428,hsa-miR-497-5p	1.68454e-05	0.000382343	23.6888
X:32216916|32310276//ENST00000357033	ENST00000545043	2588	7	19	3	hsa-miR-551b-5p,hsa-miR-6731-5p,hsa-miR-8085	1.15364e-05	0.000276944	58.3759
17:50736960|50741731//ENST00000240304	ENST00000545043	2588	5	19	2	hsa-miR-4640-5p,hsa-miR-4726-5p	0.000504132	0.00624037	54.4842
12:99772922|99812311//ENST00000549866	ENST00000545043	2588	21	19	4	hsa-miR-15a-5p,hsa-miR-15b-5p,hsa-miR-4428,hsa-miR-497-5p	1.14923e-05	0.000276074	25.9449
10:24937184|24942436//ENST00000320152	ENST00000545043	2588	6	19	2	hsa-miR-4435,hsa-miR-551b-5p	0.000752887	0.00853159	45.4035
13:101283933|101292366//ENST00000251127	ENST00000545043	2588	20	19	3	hsa-miR-15b-5p,hsa-miR-16-5p,hsa-miR-195-5p	0.000353703	0.00471303	20.4316
X:32287529|32310276//ENST00000357033	ENST00000545043	2588	7	19	3	hsa-miR-551b-5p,hsa-miR-6731-5p,hsa-miR-8085	1.15364e-05	0.000276944	58.3759
16:66608309|66610003//ENST00000361909	ENST00000567501	2588	24	12	3	hsa-miR-2467-3p,hsa-miR-4675,hsa-miR-7974	0.000146055	0.00231123	26.9583
3:17372075|17384015//ENST00000253692	ENST00000567501	2588	15	12	3	hsa-miR-4675,hsa-miR-4741,hsa-miR-7974	3.36171e-05	0.00068507	43.1333
10:68393138|68396881//ENST00000388768	ENST00000567501	2588	10	12	3	hsa-miR-1226-5p,hsa-miR-1972,hsa-miR-4721	8.98285e-06	0.000223529	64.7
16:66608309|66610003//ENST00000565666	ENST00000567501	2588	37	12	4	hsa-miR-2467-3p,hsa-miR-3138,hsa-miR-4675,hsa-miR-7974	1.61488e-05	0.000368937	23.3153
16:66608309|66610003//ENST00000564060	ENST00000567501	2588	22	12	3	hsa-miR-2467-3p,hsa-miR-4675,hsa-miR-7974	0.000111713	0.00185737	29.4091
3:14443624|14447816//ENST00000610642	ENST00000567501	2588	36	12	4	hsa-miR-1226-5p,hsa-miR-1972,hsa-miR-2467-3p,hsa-miR-4721	1.4439e-05	0.000335417	23.963
1:204116507|204117707//ENST00000272193	ENST00000567501	2588	32	12	3	hsa-miR-2467-3p,hsa-miR-3138,hsa-miR-4741	0.000350489	0.00468078	20.2188
10:119838535|119842595//ENST00000360003	ENST00000219660	2588	9	39	3	hsa-miR-3187-5p,hsa-miR-612,hsa-miR-6860	0.000249809	0.00356668	22.1197
5:74813840|74841679//ENST00000510609	ENST00000342558	2588	11	19	3	hsa-miR-106b-5p,hsa-miR-17-5p,hsa-miR-20b-5p	5.33831e-05	0.00100921	37.1483
5:108946130|108959347//ENST00000281092	ENST00000342558	2588	19	19	3	hsa-miR-106b-5p,hsa-miR-17-5p,hsa-miR-20b-5p	0.00030205	0.00415427	21.5069
5:74834426|74841679//ENST00000389156	ENST00000342558	2588	12	19	3	hsa-miR-106b-5p,hsa-miR-17-5p,hsa-miR-20b-5p	7.08471e-05	0.00127494	34.0526
5:74813840|74841679//ENST00000389156	ENST00000342558	2588	14	19	3	hsa-miR-106b-5p,hsa-miR-17-5p,hsa-miR-20b-5p	0.000116134	0.00191738	29.188
2:202811746|202821481//ENST00000358299	ENST00000342558	2588	15	19	3	hsa-miR-106b-5p,hsa-miR-17-5p,hsa-miR-4661-5p	0.000144494	0.00229133	27.2421
7:130173632|130178527//ENST00000397622	ENST00000342558	2588	20	19	3	hsa-miR-17-5p,hsa-miR-20b-5p,hsa-miR-6753-5p	0.000353703	0.00471303	20.4316
16:15776078|15786732//ENST00000300036	ENST00000296577	2588	11	14	3	hsa-miR-3689a-3p,hsa-miR-3689b-3p,hsa-miR-3689c	2.02879e-05	0.000447789	50.4156
16:15776078|15786732//ENST00000396324	ENST00000296577	2588	13	14	3	hsa-miR-3689a-3p,hsa-miR-3689b-3p,hsa-miR-3689c	3.49414e-05	0.000707903	42.6593
11:128758115|128768272//ENST00000281428	ENST00000296577	2588	48	14	6	hsa-miR-3689a-3p,hsa-miR-3689b-3p,hsa-miR-3689c,hsa-miR-4706,hsa-miR-6796-5p,hsa-miR-6883-5p	7.93833e-08	3.54488e-06	23.1071
X:17687742|17692468//ENST00000380060	ENST00000296577	2588	36	14	4	hsa-miR-3689a-3p,hsa-miR-3689b-3p,hsa-miR-3689c,hsa-miR-6780a-5p	2.86237e-05	0.000598293	20.5397
2:160313156|160367391//ENST00000348849	ENST00000296577	2588	37	14	5	hsa-miR-3689a-3p,hsa-miR-3689b-3p,hsa-miR-3689c,hsa-miR-6796-5p,hsa-miR-6883-5p	8.24745e-07	2.81646e-05	24.9807
11:9989497|10002689//ENST00000256190	ENST00000296577	2588	37	14	5	hsa-miR-3689a-3p,hsa-miR-3689b-3p,hsa-miR-3689c,hsa-miR-6780a-5p,hsa-miR-6883-5p	8.24745e-07	2.81646e-05	24.9807
11:128758115|128768272//ENST00000527767	ENST00000296577	2588	21	14	6	hsa-miR-3689a-3p,hsa-miR-3689b-3p,hsa-miR-3689c,hsa-miR-4706,hsa-miR-6796-5p,hsa-miR-6883-5p	3.77376e-10	2.8733e-08	52.8163
3:78938601|78938927//ENST00000436010	ENST00000638719	2588	10	9	2	hsa-miR-4639-3p,hsa-miR-6777-3p	0.000476988	0.00597324	57.5111
14:102194938|102209862//ENST00000424963	ENST00000303039	2588	75	2	2	hsa-miR-6845-3p,hsa-miR-7110-3p	0.000828958	0.00919884	34.5067
14:102194938|102209862//ENST00000335263	ENST00000303039	2588	72	2	2	hsa-miR-6845-3p,hsa-miR-7110-3p	0.000763537	0.00862799	35.9444
16:192927|227336//ENST00000293872	ENST00000303039	2588	26	2	2	hsa-miR-6845-3p,hsa-miR-7110-3p	9.70851e-05	0.00165522	99.5385
16:192927|227336//ENST00000418978	ENST00000303039	2588	27	2	2	hsa-miR-6845-3p,hsa-miR-7110-3p	0.000104852	0.00176318	95.8519
20:49090742|49094963//ENST00000262982	ENST00000467728	2588	12	8	2	hsa-miR-4695-5p,hsa-miR-650	0.000543558	0.00662275	53.9167
17:64562771|64571956//ENST00000262435	ENST00000467728	2588	11	8	2	hsa-miR-4695-5p,hsa-miR-650	0.000453667	0.00574205	58.8182
7:140041644|140058034//ENST00000263549	ENST00000467728	2588	24	8	3	hsa-miR-4695-5p,hsa-miR-4733-3p,hsa-miR-6810-5p	3.80971e-05	0.000761135	40.4375
1:52490732|52509712//ENST00000473856	ENST00000227667	2588	3	22	2	hsa-miR-4714-3p,hsa-miR-6780a-5p	0.000205948	0.00305639	78.4242
17:50736960|50741731//ENST00000240304	ENST00000227667	2588	5	22	2	hsa-miR-4640-5p,hsa-miR-4726-5p	0.000679436	0.00788438	47.0545
17:42345559|42348517//ENST00000264657	ENST00000227667	2588	15	22	3	hsa-miR-4640-5p,hsa-miR-4726-5p,hsa-miR-6845-5p	0.000227246	0.0033058	23.5273
9:76067955|76134212//ENST00000376752	ENST00000447146	2588	33	10	5	hsa-miR-4640-5p,hsa-miR-4685-5p,hsa-miR-4726-5p,hsa-miR-6837-5p,hsa-miR-6895-5p	5.93056e-08	2.73396e-06	39.2121
5:113082860|113085310//ENST00000302475	ENST00000447146	2588	26	10	3	hsa-miR-4640-5p,hsa-miR-4685-5p,hsa-miR-6837-5p	0.000103174	0.00173954	29.8615
12:103733006|103737780//ENST00000388887	ENST00000447146	2588	36	10	3	hsa-miR-4640-5p,hsa-miR-4726-5p,hsa-miR-6764-5p	0.000277603	0.00388406	21.5667
8:30680904|30700135//ENST00000546342	ENST00000447146	2588	29	10	4	hsa-miR-1915-3p,hsa-miR-4685-5p,hsa-miR-6764-5p,hsa-miR-6837-5p	2.5528e-06	7.55425e-05	35.6966
11:61271675|61274584//ENST00000301770	ENST00000447146	2588	32	10	3	hsa-miR-1915-3p,hsa-miR-6764-5p,hsa-miR-6837-5p	0.000194428	0.00291828	24.2625
1:204112915|204114605//ENST00000367203	ENST00000447146	2588	49	10	6	hsa-miR-3918,hsa-miR-4640-5p,hsa-miR-4685-5p,hsa-miR-4726-5p,hsa-miR-6837-5p,hsa-miR-6895-5p	6.68241e-09	3.86313e-07	31.6898
8:30680904|30700135//ENST00000221130	ENST00000447146	2588	37	10	4	hsa-miR-1915-3p,hsa-miR-4685-5p,hsa-miR-6764-5p,hsa-miR-6837-5p	6.99309e-06	0.000180476	27.9784
19:3425106|3435207//ENST00000341919	ENST00000447146	2588	38	10	3	hsa-miR-1915-3p,hsa-miR-4685-5p,hsa-miR-6754-5p	0.000326653	0.00442537	20.4316
8:30680904|30700135//ENST00000541648	ENST00000447146	2588	29	10	4	hsa-miR-1915-3p,hsa-miR-4685-5p,hsa-miR-6764-5p,hsa-miR-6837-5p	2.5528e-06	7.55425e-05	35.6966
17:50736960|50741731//ENST00000240304	ENST00000447146	2588	5	10	2	hsa-miR-4640-5p,hsa-miR-4726-5p	0.000133596	0.00214995	103.52
8:30680904|30700135//ENST00000537535	ENST00000447146	2588	23	10	4	hsa-miR-1915-3p,hsa-miR-4685-5p,hsa-miR-6764-5p,hsa-miR-6837-5p	9.62483e-07	3.2245e-05	45.0087
13:95177707|95188542//ENST00000376887	ENST00000447146	2588	15	10	3	hsa-miR-4685-5p,hsa-miR-6764-5p,hsa-miR-6837-5p	1.8465e-05	0.000413424	51.76
1:203720549|203722689//ENST00000341360	ENST00000447146	2588	31	10	3	hsa-miR-3918,hsa-miR-4685-5p,hsa-miR-6837-5p	0.00017656	0.00269986	25.0452
16:68025415|68054617//ENST00000565263	ENST00000447146	2588	19	10	4	hsa-miR-3918,hsa-miR-4640-5p,hsa-miR-4685-5p,hsa-miR-6837-5p	4.24455e-07	1.56838e-05	54.4842
19:34490376|34495771//ENST00000585928	ENST00000447146	2588	31	10	6	hsa-miR-3918,hsa-miR-4270,hsa-miR-4685-5p,hsa-miR-6754-5p,hsa-miR-6764-5p,hsa-miR-6837-5p	3.60452e-10	2.75779e-08	50.0903
21:25975070|26000182//ENST00000357903	ENST00000447146	2588	35	10	4	hsa-miR-4640-5p,hsa-miR-4685-5p,hsa-miR-6837-5p,hsa-miR-6895-5p	5.56488e-06	0.000148274	29.5771
16:53469916|53470922//ENST00000262133	ENST00000447146	2588	35	10	3	hsa-miR-3918,hsa-miR-4685-5p,hsa-miR-6837-5p	0.00025499	0.00362802	22.1829
21:25975070|26000182//ENST00000346798	ENST00000447146	2588	37	10	4	hsa-miR-4640-5p,hsa-miR-4685-5p,hsa-miR-6837-5p,hsa-miR-6895-5p	6.99309e-06	0.000180476	27.9784
11:94821530|94831541//ENST00000317829	ENST00000447146	2588	52	10	6	hsa-miR-1915-3p,hsa-miR-4270,hsa-miR-4685-5p,hsa-miR-6754-5p,hsa-miR-6764-5p,hsa-miR-6837-5p	9.68943e-09	5.40395e-07	29.8615
3:47840877|47843255//ENST00000348968	ENST00000447146	2588	45	10	4	hsa-miR-3918,hsa-miR-4640-5p,hsa-miR-4726-5p,hsa-miR-6895-5p	1.55411e-05	0.000357224	23.0044
5:157359005|157361598//ENST00000435847	ENST00000233143	2588	29	13	3	hsa-miR-4691-5p,hsa-miR-5090,hsa-miR-6775-5p	0.00033577	0.00452454	20.5942
12:56213958|56216613//ENST00000345093	ENST00000233143	2588	17	13	3	hsa-miR-4691-5p,hsa-miR-4726-3p,hsa-miR-7109-5p	6.47079e-05	0.00118351	35.1312
3:183033991|183041750//ENST00000497959	ENST00000549151	2588	11	33	3	hsa-miR-149-5p,hsa-miR-1915-5p,hsa-miR-3925-3p	0.000290922	0.00403265	21.3884
9:76067955|76071898//ENST00000376752	ENST00000396078	2588	11	35	3	hsa-miR-637,hsa-miR-6751-5p,hsa-miR-6803-5p	0.000347364	0.00464854	20.1662
19:9652953|9660874//ENST00000293648	ENST00000450251	2588	21	16	3	hsa-miR-4632-5p,hsa-miR-548ax,hsa-miR-6735-5p	0.000241128	0.00346757	23.1071
5:138006990|138011945//ENST00000033079	ENST00000559082	2588	10	10	2	hsa-miR-3190-3p,hsa-miR-6833-5p	0.000595005	0.00710843	51.76
5:157518823|157537991//ENST00000257527	ENST00000610723	2588	19	20	3	hsa-miR-3184-5p,hsa-miR-4739,hsa-miR-6785-5p	0.000353703	0.00471303	20.4316
1:20749723|20773610//ENST00000312239	ENST00000512583	2588	30	12	3	hsa-miR-3180-5p,hsa-miR-5088-3p,hsa-miR-6756-3p	0.000288402	0.00400612	21.5667
2:15603192|15607313//ENST00000233084	ENST00000512583	2588	8	12	2	hsa-miR-6768-5p,hsa-miR-7152-5p	0.000543558	0.00662275	53.9167
12:31423597|31426424//ENST00000389082	ENST00000512583	2588	10	12	2	hsa-miR-214-3p,hsa-miR-3619-5p	0.000869077	0.00953846	43.1333
1:20765377|20776750//ENST00000312239	ENST00000512583	2588	28	12	3	hsa-miR-3180-5p,hsa-miR-5088-3p,hsa-miR-6756-3p	0.000233935	0.00338395	23.1071
19:3425106|3435207//ENST00000341919	ENST00000335440	2588	38	10	3	hsa-miR-1184,hsa-miR-1915-3p,hsa-miR-764	0.000326653	0.00442537	20.4316
3:14443624|14447816//ENST00000610642	ENST00000335440	2588	36	10	3	hsa-miR-1184,hsa-miR-1915-3p,hsa-miR-3194-5p	0.000277603	0.00388406	21.5667
10:125995417|126008550//ENST00000368693	ENST00000335440	2588	28	10	3	hsa-let-7a-2-3p,hsa-miR-509-3-5p,hsa-miR-7156-3p	0.00012947	0.00209478	27.7286
10:125995417|126008550//ENST00000368691	ENST00000335440	2588	28	10	3	hsa-let-7a-2-3p,hsa-miR-509-3-5p,hsa-miR-7156-3p	0.00012947	0.00209478	27.7286
3:195306511|195336976//ENST00000439758	ENST00000446775	2588	7	4	2	hsa-miR-1266-3p,hsa-miR-6872-3p	3.75422e-05	0.000751994	184.857
13:23590150|23626792//ENST00000248484	ENST00000446775	2588	20	4	2	hsa-miR-5581-3p,hsa-miR-6872-3p	0.000337392	0.00454099	64.7
14:22950314|22952683//ENST00000342454	ENST00000446775	2588	18	4	2	hsa-miR-5581-3p,hsa-miR-6872-3p	0.000271971	0.00381997	71.8889
14:22950314|22952683//ENST00000206474	ENST00000446775	2588	29	4	2	hsa-miR-5581-3p,hsa-miR-6872-3p	0.000717598	0.00822446	44.6207
15:59671183|59680308//ENST00000267859	ENST00000446775	2588	6	4	2	hsa-miR-1266-3p,hsa-miR-26b-3p	2.68297e-05	0.000566694	215.667
3:195306511|195336976//ENST00000326793	ENST00000446775	2588	7	4	2	hsa-miR-1266-3p,hsa-miR-6872-3p	3.75422e-05	0.000751994	184.857
3:195306511|195336976//ENST00000635383	ENST00000446775	2588	7	4	2	hsa-miR-1266-3p,hsa-miR-6872-3p	3.75422e-05	0.000751994	184.857
1:179986169|179997175//ENST00000367607	ENST00000228434	2588	27	16	4	hsa-miR-519a-3p,hsa-miR-519b-3p,hsa-miR-6501-3p,hsa-miR-8087	1.57204e-05	0.000360662	23.963
5:157518823|157537991//ENST00000257527	ENST00000448696	2588	19	3	2	hsa-miR-3909,hsa-miR-6852-3p	0.000152574	0.00239659	90.807
1:8465925|8614686//ENST00000337907	ENST00000448696	2588	32	3	2	hsa-miR-3909,hsa-miR-6852-3p	0.000441063	0.00561496	53.9167
14:102968253|102970261//ENST00000361246	ENST00000535987	2588	23	14	4	hsa-miR-4267,hsa-miR-4717-3p,hsa-miR-6836-3p,hsa-miR-891a-3p	4.48078e-06	0.000123022	32.1491
8:140739018|140752316//ENST00000340930	ENST00000215473	2588	9	12	2	hsa-miR-1224-5p,hsa-miR-5004-5p	0.000697058	0.00803827	47.9259
13:41727194|41778056//ENST00000281496	ENST00000395580	2588	6	13	2	hsa-miR-3929,hsa-miR-4419b	0.000345559	0.0046293	66.359
10:26759062|26770345//ENST00000359188	ENST00000395580	2588	29	13	4	hsa-miR-3929,hsa-miR-4419b,hsa-miR-665,hsa-miR-6884-5p	8.49141e-06	0.000213094	27.4589
8:86494829|86507112//ENST00000522804	ENST00000395580	2588	29	13	3	hsa-miR-3929,hsa-miR-665,hsa-miR-6884-5p	0.00033577	0.00452454	20.5942
18:21366027|21395561//ENST00000269218	ENST00000395580	2588	21	13	3	hsa-miR-3147,hsa-miR-4514,hsa-miR-6754-5p	0.000125096	0.00203727	28.4396
7:66771883|66775393//ENST00000484547	ENST00000395580	2588	36	13	4	hsa-miR-1207-5p,hsa-miR-3929,hsa-miR-4419b,hsa-miR-6884-5p	2.06499e-05	0.000454503	22.1197
18:21366027|21395561//ENST00000580732	ENST00000395580	2588	21	13	3	hsa-miR-3147,hsa-miR-4514,hsa-miR-6754-5p	0.000125096	0.00203727	28.4396
7:130945720|131052555//ENST00000451786	ENST00000395580	2588	28	13	4	hsa-miR-3929,hsa-miR-4419b,hsa-miR-665,hsa-miR-6884-5p	7.34073e-06	0.000188173	28.4396
6:85557976|85572374//ENST00000508980	ENST00000395580	2588	17	13	3	hsa-miR-4419b,hsa-miR-6884-5p,hsa-miR-7160-5p	6.47079e-05	0.00118351	35.1312
10:26759062|26770345//ENST00000376138	ENST00000395580	2588	28	13	4	hsa-miR-3929,hsa-miR-4419b,hsa-miR-665,hsa-miR-6884-5p	7.34073e-06	0.000188173	28.4396
4:102906536|102912129//ENST00000503584	ENST00000395580	2588	21	13	3	hsa-miR-3929,hsa-miR-4419b,hsa-miR-6884-5p	0.000125096	0.00203727	28.4396
10:26759062|26770345//ENST00000346832	ENST00000395580	2588	37	13	4	hsa-miR-3929,hsa-miR-4419b,hsa-miR-665,hsa-miR-6884-5p	2.3088e-05	0.00049947	21.5218
2:159777938|159783469//ENST00000480212	ENST00000395580	2588	26	13	4	hsa-miR-1827,hsa-miR-4419b,hsa-miR-665,hsa-miR-6884-5p	5.39003e-06	0.000144263	30.6272
2:127989564|127989866//ENST00000259234	ENST00000206542	2588	19	24	5	hsa-miR-3170,hsa-miR-3929,hsa-miR-4478,hsa-miR-615-5p,hsa-miR-6852-5p	4.70491e-07	1.71803e-05	28.3772
13:41727194|41778056//ENST00000281496	ENST00000298139	2588	6	8	2	hsa-miR-3929,hsa-miR-4419b	0.000124689	0.00203202	107.833
14:22950314|22952683//ENST00000206474	ENST00000592957	2588	29	8	3	hsa-miR-6512-3p,hsa-miR-6720-5p,hsa-miR-766-3p	6.82783e-05	0.00123791	33.4655
7:152330601|152358675//ENST00000452749	ENST00000592957	2588	9	8	2	hsa-miR-6512-3p,hsa-miR-766-3p	0.000297867	0.00410959	71.8889
7:152330601|152358675//ENST00000262189	ENST00000592957	2588	9	8	2	hsa-miR-6512-3p,hsa-miR-766-3p	0.000297867	0.00410959	71.8889
10:115215697|115334419//ENST00000355044	ENST00000494626	2588	37	3	2	hsa-miR-6760-3p,hsa-miR-6818-3p	0.000591464	0.00707689	46.6306
11:8435494|8464822//ENST00000315204	ENST00000332987	2588	13	9	2	hsa-miR-135b-5p,hsa-miR-4457	0.000822309	0.00913863	44.2393
7:130026158|130049144//ENST00000471022	ENST00000372034	2588	24	25	5	hsa-miR-3135b,hsa-miR-3155a,hsa-miR-3155b,hsa-miR-4747-5p,hsa-miR-5196-5p	2.07168e-06	6.29993e-05	21.5667
X:37386599|37426000//ENST00000449135	ENST00000523189	2588	6	47	3	hsa-miR-1229-5p,hsa-miR-5572,hsa-miR-6812-5p	0.000108138	0.00180813	27.5319
3:48979482|48980496//ENST00000356401	ENST00000397899	2588	12	21	3	hsa-miR-3158-3p,hsa-miR-642a-3p,hsa-miR-642b-3p	9.67328e-05	0.00165007	30.8095
2:159955199|159970212//ENST00000283243	ENST00000397899	2588	14	21	3	hsa-miR-1236-3p,hsa-miR-3667-3p,hsa-miR-6809-3p	0.000158382	0.00247022	26.4082
3:12516611|12532773//ENST00000284995	ENST00000397899	2588	13	21	3	hsa-miR-1587,hsa-miR-3620-5p,hsa-miR-4656	0.000125096	0.00203727	28.4396
X:84148042|84164387//ENST00000262752	ENST00000397899	2588	6	21	2	hsa-miR-1236-3p,hsa-miR-205-5p	0.000922686	0.00999232	41.0794
2:205440370|205440672//ENST00000351153	ENST00000368956	2588	12	17	3	hsa-miR-4723-5p,hsa-miR-6870-5p,hsa-miR-7111-5p	4.99784e-05	0.000955537	38.0588
3:105670233|105685466//ENST00000394030	ENST00000368956	2588	33	17	5	hsa-miR-4665-5p,hsa-miR-4723-5p,hsa-miR-6825-5p,hsa-miR-6870-5p,hsa-miR-7111-5p	1.36661e-06	4.37929e-05	23.066
10:124681607|124706887//ENST00000280780	ENST00000301200	2588	80	6	4	hsa-miR-5196-5p,hsa-miR-6737-5p,hsa-miR-6812-5p,hsa-miR-6819-5p	1.21302e-05	0.000289128	21.5667
11:47358844|47375729//ENST00000227163	ENST00000301200	2588	57	6	3	hsa-miR-6737-5p,hsa-miR-6812-5p,hsa-miR-6819-5p	0.000193423	0.00290707	22.7018
3:160521779|160528039//ENST00000334256	ENST00000301200	2588	18	6	2	hsa-miR-6812-5p,hsa-miR-6819-5p	0.000674333	0.00783635	47.9259
17:32171043|32183272//ENST00000578205	ENST00000301200	2588	16	6	2	hsa-miR-6737-5p,hsa-miR-6812-5p	0.000529983	0.00649161	53.9167
17:32171043|32183272//ENST00000333942	ENST00000301200	2588	15	6	2	hsa-miR-6737-5p,hsa-miR-6812-5p	0.000464215	0.00584847	57.5111
9:122989297|122990213//ENST00000373647	ENST00000301200	2588	9	6	2	hsa-miR-6737-5p,hsa-miR-6812-5p	0.000160149	0.00249313	95.8519
9:85822880|85830576//ENST00000431724	ENST00000301200	2588	47	6	3	hsa-miR-6737-5p,hsa-miR-6812-5p,hsa-miR-6819-5p	0.000108138	0.00180813	27.5319
11:126017088|126021520//ENST00000263577	ENST00000301200	2588	19	6	2	hsa-miR-6812-5p,hsa-miR-6819-5p	0.000752887	0.00853159	45.4035
1:168104477|168104894//ENST00000271357	ENST00000301200	2588	52	6	3	hsa-miR-6737-5p,hsa-miR-6812-5p,hsa-miR-6819-5p	0.000146737	0.00232032	24.8846
21:37420299|37496258//ENST00000339659	ENST00000301200	2588	49	6	3	hsa-miR-5196-5p,hsa-miR-6812-5p,hsa-miR-6819-5p	0.000122654	0.00200511	26.4082
4:88475841|88494331//ENST00000264350	ENST00000301200	2588	17	6	2	hsa-miR-6812-5p,hsa-miR-6819-5p	0.000600027	0.00715399	50.7451
18:56758865|56781656//ENST00000357574	ENST00000301200	2588	21	6	2	hsa-miR-6737-5p,hsa-miR-6819-5p	0.000922686	0.00999232	41.0794
2:160313156|160367391//ENST00000348849	ENST00000301200	2588	37	6	3	hsa-miR-6737-5p,hsa-miR-6812-5p,hsa-miR-6819-5p	5.22759e-05	0.000991725	34.973
18:13681605|13682105//ENST00000322247	ENST00000301200	2588	12	6	2	hsa-miR-6812-5p,hsa-miR-6819-5p	0.000292699	0.00405204	71.8889
1:12275825|12278038//ENST00000613099	ENST00000301200	2588	57	6	3	hsa-miR-6737-5p,hsa-miR-6812-5p,hsa-miR-6819-5p	0.000193423	0.00290707	22.7018
9:122989297|122990213//ENST00000317419	ENST00000301200	2588	15	6	2	hsa-miR-6737-5p,hsa-miR-6812-5p	0.000464215	0.00584847	57.5111
9:126381064|126395697//ENST00000361171	ENST00000301200	2588	35	6	4	hsa-miR-5196-5p,hsa-miR-6737-5p,hsa-miR-6812-5p,hsa-miR-6819-5p	4.1312e-07	1.53175e-05	49.2952
21:37420299|37496258//ENST00000338785	ENST00000301200	2588	49	6	3	hsa-miR-5196-5p,hsa-miR-6812-5p,hsa-miR-6819-5p	0.000122654	0.00200511	26.4082
7:130026158|130049144//ENST00000311873	ENST00000562901	2588	29	17	4	hsa-miR-3620-5p,hsa-miR-4700-5p,hsa-miR-6737-5p,hsa-miR-8089	2.74002e-05	0.000576787	20.998
7:130026158|130049144//ENST00000471022	ENST00000562901	2588	24	17	4	hsa-miR-3620-5p,hsa-miR-4700-5p,hsa-miR-6737-5p,hsa-miR-8089	1.25092e-05	0.000296726	25.3725
2:58198579|58232112//ENST00000402135	ENST00000562901	2588	18	17	3	hsa-miR-4667-5p,hsa-miR-4700-5p,hsa-miR-8089	0.000180901	0.0027526	25.3725
2:201565729|201575326//ENST00000286195	ENST00000562901	2588	6	17	2	hsa-miR-4700-5p,hsa-miR-8089	0.000600027	0.00715399	50.7451
2:121503167|121530325//ENST00000263710	ENST00000562901	2588	22	17	3	hsa-miR-4667-5p,hsa-miR-4700-5p,hsa-miR-8089	0.000335889	0.00452468	20.7594
2:160313156|160367391//ENST00000348849	ENST00000562901	2588	37	17	7	hsa-miR-1587,hsa-miR-3620-5p,hsa-miR-4651,hsa-miR-608,hsa-miR-6737-5p,hsa-miR-6812-5p,hsa-miR-6819-5p	1.18113e-09	8.08181e-08	28.8013
18:13681605|13682105//ENST00000322247	ENST00000562901	2588	12	17	3	hsa-miR-4651,hsa-miR-6812-5p,hsa-miR-6819-5p	4.99784e-05	0.000955537	38.0588
6:42573734|42594304//ENST00000372899	ENST00000562901	2588	14	17	3	hsa-miR-296-3p,hsa-miR-6124,hsa-miR-92a-1-5p	8.20209e-05	0.00144	32.6218
15:48596283|48613092//ENST00000316623	ENST00000545675	2588	19	23	4	hsa-miR-1301-3p,hsa-miR-4476,hsa-miR-6876-5p,hsa-miR-708-5p	1.68454e-05	0.000382343	23.6888
8:70213903|70216764//ENST00000452400	ENST00000262942	2588	6	8	2	hsa-miR-185-3p,hsa-miR-4260	0.000124689	0.00203202	107.833
5:74813840|74841679//ENST00000510609	ENST00000398658	2588	11	27	4	hsa-miR-106a-5p,hsa-miR-17-5p,hsa-miR-20a-5p,hsa-miR-20b-5p	2.95411e-06	8.57508e-05	34.8552
5:108946130|108959347//ENST00000281092	ENST00000398658	2588	19	27	5	hsa-miR-106a-5p,hsa-miR-17-5p,hsa-miR-20a-5p,hsa-miR-20b-5p,hsa-miR-93-5p	8.81525e-07	2.98478e-05	25.2242
5:74834426|74841679//ENST00000389156	ENST00000398658	2588	12	27	5	hsa-miR-106a-5p,hsa-miR-17-5p,hsa-miR-20a-5p,hsa-miR-20b-5p,hsa-miR-450b-3p	6.31156e-08	2.89113e-06	39.9383
5:74813840|74841679//ENST00000389156	ENST00000398658	2588	14	27	5	hsa-miR-106a-5p,hsa-miR-17-5p,hsa-miR-20a-5p,hsa-miR-20b-5p,hsa-miR-450b-3p	1.57283e-07	6.5129e-06	34.2328
3:65018441|65050822//XLOC.132426.12	ENST00000398658	2588	46	27	12	hsa-miR-106a-5p,hsa-miR-1304-3p,hsa-miR-17-5p,hsa-miR-20a-5p,hsa-miR-20b-5p,hsa-miR-373-3p,hsa-miR-500b-3p,hsa-miR-619-5p,hsa-miR-640,hsa-miR-6747-3p,hsa-miR-6804-3p,hsa-miR-93-5p	3.06235e-15	6.19176e-13	25.0048
9:125341177|125346941//ENST00000394083	ENST00000398658	2588	9	27	3	hsa-miR-450b-3p,hsa-miR-619-5p,hsa-miR-769-3p	8.16519e-05	0.00143467	31.9506
17:64562771|64571956//ENST00000262435	ENST00000557879	2588	11	31	3	hsa-miR-4459,hsa-miR-4695-5p,hsa-miR-665	0.000240802	0.00346505	22.7683
7:75199651|75202613//ENST00000614592	ENST00000557879	2588	11	31	3	hsa-miR-4459,hsa-miR-4695-5p,hsa-miR-665	0.000240802	0.00346505	22.7683
19:8468774|8474244//ENST00000600092	ENST00000557879	2588	12	31	3	hsa-miR-4459,hsa-miR-6872-3p,hsa-miR-6887-3p	0.000318466	0.00433572	20.871
2:159777938|159783469//ENST00000480212	ENST00000557879	2588	26	31	8	hsa-miR-1273e,hsa-miR-1273g-3p,hsa-miR-4459,hsa-miR-4695-5p,hsa-miR-508-5p,hsa-miR-665,hsa-miR-6720-5p,hsa-miR-7703	2.16247e-10	1.73055e-08	25.6873
6:136656307|136698682//ENST00000359015	ENST00000524815	2588	22	7	3	hsa-miR-4459,hsa-miR-5006-5p,hsa-miR-665	1.82704e-05	0.000409763	50.4156
17:64562771|64571956//ENST00000262435	ENST00000524815	2588	11	7	2	hsa-miR-4459,hsa-miR-665	0.000341041	0.00458098	67.2208
1:35470863|35479212//ENST00000325722	ENST00000524815	2588	16	7	2	hsa-miR-5787,hsa-miR-6797-5p	0.000739301	0.00841095	46.2143
1:35470863|35479212//ENST00000431916	ENST00000524815	2588	13	7	2	hsa-miR-5787,hsa-miR-6797-5p	0.000482411	0.00602409	56.8791
7:75199651|75202613//ENST00000614592	ENST00000524815	2588	11	7	2	hsa-miR-4459,hsa-miR-665	0.000341041	0.00458098	67.2208
19:8468774|8474244//ENST00000600092	ENST00000524815	2588	12	7	2	hsa-miR-4459,hsa-miR-6797-5p	0.000408722	0.00528673	61.619
19:8468774|8474244//ENST00000325495	ENST00000524815	2588	13	7	2	hsa-miR-4459,hsa-miR-6797-5p	0.000482411	0.00602409	56.8791
11:9989497|10002689//ENST00000256190	ENST00000577538	2588	37	3	2	hsa-miR-4758-5p,hsa-miR-4769-5p	0.000591464	0.00707689	46.6306
7:5986759|5992057//ENST00000265849	ENST00000503676	2588	49	7	3	hsa-miR-512-3p,hsa-miR-5693,hsa-miR-6762-3p	0.000211784	0.0031248	22.6356
3:65018441|65050822//XLOC.132426.15	ENST00000546080	2588	25	9	3	hsa-miR-3154,hsa-miR-4739,hsa-miR-7106-5p	6.443e-05	0.00117944	34.5067
12:105203703|105211317//ENST00000258530	ENST00000546080	2588	21	9	3	hsa-miR-4739,hsa-miR-7106-5p,hsa-miR-7515	3.75189e-05	0.000751647	41.0794
12:105203703|105211317//ENST00000551662	ENST00000546080	2588	21	9	3	hsa-miR-4739,hsa-miR-7106-5p,hsa-miR-7515	3.75189e-05	0.000751647	41.0794
12:64062917|64065219//ENST00000355086	ENST00000422698	2588	23	2	2	hsa-miR-3138,hsa-miR-8071	7.5577e-05	0.0013449	112.522
19:20792512|20793878//ENST00000344519	ENST00000278937	2588	4	19	2	hsa-miR-520a-5p,hsa-miR-525-5p	0.00030381	0.00417402	68.1053
5:38527155|38530666//ENST00000263409	ENST00000278937	2588	3	19	2	hsa-miR-520a-5p,hsa-miR-525-5p	0.000152574	0.00239659	90.807
14:90676523|90689712//ENST00000328459	ENST00000278937	2588	20	19	3	hsa-miR-520a-5p,hsa-miR-525-5p,hsa-miR-767-3p	0.000353703	0.00471303	20.4316
10:118685983|118695230//ENST00000369151	ENST00000450892	2588	20	17	3	hsa-miR-1249-5p,hsa-miR-1301-3p,hsa-miR-4510	0.000250679	0.00357646	22.8353
10:118685983|118695230//ENST00000493518	ENST00000450892	2588	20	17	3	hsa-miR-1249-5p,hsa-miR-1301-3p,hsa-miR-4510	0.000250679	0.00357646	22.8353
4:88475841|88494331//ENST00000264350	ENST00000450892	2588	17	17	3	hsa-miR-6812-5p,hsa-miR-6819-5p,hsa-miR-6868-3p	0.000151366	0.00238087	26.8651
10:119838535|119842595//ENST00000360003	ENST00000257832	2588	9	49	5	hsa-miR-3154,hsa-miR-3187-5p,hsa-miR-5189-5p,hsa-miR-612,hsa-miR-6860	2.35451e-07	9.31657e-06	29.3424
9:75932379|75986245//ENST00000376752	ENST00000257832	2588	6	49	3	hsa-miR-5189-5p,hsa-miR-612,hsa-miR-6860	0.000122654	0.00200511	26.4082
12:98773042|98801125//ENST00000547362	ENST00000257832	2588	10	49	4	hsa-miR-1285-3p,hsa-miR-3187-5p,hsa-miR-5189-5p,hsa-miR-6860	2.19346e-05	0.000478493	21.1265
13:45411362|45411938//ENST00000310862	ENST00000257832	2588	9	49	4	hsa-miR-1285-3p,hsa-miR-3187-5p,hsa-miR-3194-5p,hsa-miR-6860	1.33464e-05	0.000313653	23.4739
10:5773842|5800705//ENST00000380191	ENST00000400960	2588	10	26	3	hsa-miR-103a-3p,hsa-miR-486-3p,hsa-miR-7703	0.000103174	0.00173954	29.8615
15:41055247|41058781//ENST00000361937	ENST00000379066	2588	7	46	3	hsa-miR-4717-3p,hsa-miR-770-5p,hsa-miR-922	0.00017511	0.00268147	24.1118
2:9318524|9327911//ENST00000281419	ENST00000379066	2588	8	46	3	hsa-miR-4747-5p,hsa-miR-483-3p,hsa-miR-5196-5p	0.000276688	0.00387416	21.0978
1:70417937|70424416//ENST00000370938	ENST00000638835	2588	7	11	2	hsa-miR-6843-3p,hsa-miR-6855-5p	0.000341041	0.00458098	67.2208
1:179889310|179914054//ENST00000528443	ENST00000638835	2588	8	11	2	hsa-miR-3652,hsa-miR-3922-3p	0.000453667	0.00574205	58.8182
1:179889310|179914054//ENST00000271583	ENST00000638835	2588	9	11	2	hsa-miR-3652,hsa-miR-3922-3p	0.000581933	0.00698748	52.2828
6:138945219|138947913//ENST00000258062	ENST00000367981	2588	27	10	3	hsa-miR-4667-5p,hsa-miR-4700-5p,hsa-miR-8089	0.000115834	0.00191385	28.7556
7:130026158|130049144//ENST00000311873	ENST00000367981	2588	29	10	4	hsa-miR-4700-5p,hsa-miR-4747-5p,hsa-miR-5196-5p,hsa-miR-8089	2.5528e-06	7.55425e-05	35.6966
7:130026158|130049144//ENST00000471022	ENST00000367981	2588	24	10	4	hsa-miR-4700-5p,hsa-miR-4747-5p,hsa-miR-5196-5p,hsa-miR-8089	1.15282e-06	3.77311e-05	43.1333
17:78392476|78398351//ENST00000589426	ENST00000367981	2588	28	10	3	hsa-miR-4667-5p,hsa-miR-4700-5p,hsa-miR-8089	0.00012947	0.00209478	27.7286
10:12117673|12120267//ENST00000263035	ENST00000367981	2588	8	10	2	hsa-miR-4747-5p,hsa-miR-5196-5p	0.000371758	0.00490455	64.7
1:52490732|52509712//ENST00000257177	ENST00000367981	2588	18	10	3	hsa-miR-4271,hsa-miR-4747-5p,hsa-miR-6780b-5p	3.29135e-05	0.000672924	43.1333
22:41125864|41130003//ENST00000263253	ENST00000367981	2588	36	10	3	hsa-miR-4725-3p,hsa-miR-4747-5p,hsa-miR-6780b-5p	0.000277603	0.00388406	21.5667
3:14443624|14447816//ENST00000622176	ENST00000367981	2588	44	10	4	hsa-miR-125a-3p,hsa-miR-4667-5p,hsa-miR-4700-5p,hsa-miR-8089	1.41863e-05	0.00033045	23.5273
2:58198579|58232112//ENST00000402135	ENST00000367981	2588	18	10	3	hsa-miR-4667-5p,hsa-miR-4700-5p,hsa-miR-8089	3.29135e-05	0.000672924	43.1333
2:201565729|201575326//ENST00000286195	ENST00000367981	2588	6	10	2	hsa-miR-4700-5p,hsa-miR-8089	0.00019998	0.00298348	86.2667
2:9318524|9327911//ENST00000281419	ENST00000367981	2588	8	10	2	hsa-miR-4747-5p,hsa-miR-5196-5p	0.000371758	0.00490455	64.7
17:78392476|78398351//ENST00000262764	ENST00000367981	2588	32	10	3	hsa-miR-4667-5p,hsa-miR-4700-5p,hsa-miR-8089	0.000194428	0.00291828	24.2625
2:121503167|121530325//ENST00000263710	ENST00000367981	2588	22	10	3	hsa-miR-4667-5p,hsa-miR-4700-5p,hsa-miR-8089	6.16116e-05	0.00113666	35.2909
17:20253505|20306082//ENST00000581399	ENST00000367981	2588	22	10	3	hsa-miR-4725-3p,hsa-miR-5196-5p,hsa-miR-6780b-5p	6.16116e-05	0.00113666	35.2909
1:204116507|204117707//ENST00000272193	ENST00000367981	2588	32	10	3	hsa-miR-4487,hsa-miR-4725-3p,hsa-miR-6780b-5p	0.000194428	0.00291828	24.2625
17:20253505|20306082//ENST00000261503	ENST00000367981	2588	33	10	3	hsa-miR-4725-3p,hsa-miR-5196-5p,hsa-miR-6780b-5p	0.000213434	0.0031446	23.5273
4:109530289|109531522//ENST00000265175	ENST00000412779	2588	12	23	3	hsa-miR-4510,hsa-miR-6127,hsa-miR-6129	0.000128134	0.00207726	28.1304
12:104120400|104123423//ENST00000240055	ENST00000327268	2588	5	18	2	hsa-miR-6780a-3p,hsa-miR-6829-3p	0.000451416	0.00572137	57.5111
7:128574720|128592017//ENST00000479267	ENST00000327268	2588	20	18	3	hsa-miR-6780a-3p,hsa-miR-6791-3p,hsa-miR-6829-3p	0.000299331	0.00412563	21.5667
4:94573351|94586444//ENST00000317968	ENST00000348956	2588	39	8	3	hsa-miR-138-5p,hsa-miR-5001-5p,hsa-miR-762	0.000168293	0.00259577	24.8846
9:79612656|79654075//ENST00000435650	ENST00000348956	2588	38	8	3	hsa-miR-138-5p,hsa-miR-5001-5p,hsa-miR-762	0.000155575	0.00243487	25.5395
5:73058433|73077493//ENST00000430046	ENST00000348956	2588	29	8	4	hsa-miR-138-5p,hsa-miR-3619-5p,hsa-miR-5001-5p,hsa-miR-762	8.64258e-07	2.93365e-05	44.6207
10:52280789|52290290//ENST00000373975	ENST00000348956	2588	14	8	2	hsa-miR-541-3p,hsa-miR-6838-5p	0.000747132	0.00847956	46.2143
9:79612656|79654075//ENST00000376537	ENST00000348956	2588	38	8	3	hsa-miR-138-5p,hsa-miR-5001-5p,hsa-miR-762	0.000155575	0.00243487	25.5395
9:137564434|137565154//ENST00000479650	ENST00000348956	2588	32	8	3	hsa-miR-138-5p,hsa-miR-5001-5p,hsa-miR-762	9.2277e-05	0.00158756	30.3281
11:120476661|120477526//ENST00000356641	ENST00000377930	2588	13	41	5	hsa-miR-378a-3p,hsa-miR-378c,hsa-miR-378d,hsa-miR-378e,hsa-miR-378f	9.1147e-07	3.07366e-05	24.2777
10:45728862|45740246//ENST00000336378	ENST00000377930	2588	18	41	7	hsa-miR-378a-3p,hsa-miR-378c,hsa-miR-378d,hsa-miR-378e,hsa-miR-378i,hsa-miR-422a,hsa-miR-584-3p	4.11498e-09	2.4961e-07	24.5474
10:50069547|50080931//ENST00000282633	ENST00000377930	2588	18	41	7	hsa-miR-378a-3p,hsa-miR-378c,hsa-miR-378d,hsa-miR-378e,hsa-miR-378i,hsa-miR-422a,hsa-miR-584-3p	4.11498e-09	2.4961e-07	24.5474
X:73577407|73584572//ENST00000373502	ENST00000361685	2588	8	13	2	hsa-miR-6838-5p,hsa-miR-922	0.000641392	0.00753621	49.7692
14:31380467|31383771//ENST00000538864	ENST00000361685	2588	8	13	2	hsa-miR-6838-5p,hsa-miR-922	0.000641392	0.00753621	49.7692
9:125341177|125346941//ENST00000297933	ENST00000361685	2588	8	13	2	hsa-miR-4658,hsa-miR-6790-5p	0.000641392	0.00753621	49.7692
2:121503167|121530325//ENST00000263710	ENST00000361685	2588	22	13	3	hsa-miR-4469,hsa-miR-6790-5p,hsa-miR-922	0.000144427	0.00229075	27.1469
20:48941199|48953790//ENST00000371917	ENST00000397048	2588	31	15	5	hsa-miR-145-5p,hsa-miR-1976,hsa-miR-3180-5p,hsa-miR-6764-5p,hsa-miR-6813-5p	4.86652e-07	1.77014e-05	27.828
11:118556906|118559864//ENST00000264021	ENST00000397048	2588	4	15	2	hsa-miR-3180-5p,hsa-miR-4647	0.000186937	0.00282598	86.2667
19:43497118|43497876//ENST00000292140	ENST00000397048	2588	29	15	4	hsa-miR-145-5p,hsa-miR-1976,hsa-miR-6741-3p,hsa-miR-6764-5p	1.59609e-05	0.000365351	23.7977
3:179859062|179898246//ENST00000263962	ENST00000566206	2588	30	11	3	hsa-miR-4757-5p,hsa-miR-485-5p,hsa-miR-6744-3p	0.000218006	0.00319787	23.5273
6:138945219|138947913//ENST00000258062	ENST00000566206	2588	27	11	4	hsa-miR-485-5p,hsa-miR-619-5p,hsa-miR-6744-3p,hsa-miR-6884-5p	2.95411e-06	8.57508e-05	34.8552
10:86467279|86473973//ENST00000263070	ENST00000435064	2588	22	34	6	hsa-miR-4632-5p,hsa-miR-5189-5p,hsa-miR-612,hsa-miR-6735-5p,hsa-miR-6860,hsa-miR-6879-5p	2.08263e-07	8.35512e-06	20.7594
2:99418828|99435941//ENST00000258428	ENST00000435064	2588	17	34	5	hsa-miR-30c-2-3p,hsa-miR-3192-5p,hsa-miR-4757-5p,hsa-miR-6744-3p,hsa-miR-6788-5p	1.59599e-06	5.01871e-05	22.3875
6:42650284|42652645//ENST00000372899	ENST00000435064	2588	11	34	3	hsa-miR-4632-5p,hsa-miR-6735-5p,hsa-miR-6879-5p	0.000318332	0.00433471	20.7594
12:106842589|106851594//ENST00000355478	ENST00000435064	2588	11	34	3	hsa-miR-3187-5p,hsa-miR-612,hsa-miR-6860	0.000318332	0.00433471	20.7594
10:119838535|119842595//ENST00000360003	ENST00000435064	2588	9	34	4	hsa-miR-3187-5p,hsa-miR-5189-5p,hsa-miR-612,hsa-miR-6860	2.99065e-06	8.66822e-05	33.8301
6:109475399|109476930//ENST00000230122	ENST00000435064	2588	13	34	4	hsa-miR-5189-5p,hsa-miR-612,hsa-miR-6811-5p,hsa-miR-6860	1.63493e-05	0.000372784	23.4208
9:75932379|75986245//ENST00000376752	ENST00000435064	2588	6	34	3	hsa-miR-5189-5p,hsa-miR-612,hsa-miR-6860	4.0366e-05	0.000799019	38.0588
2:99418828|99435941//ENST00000393445	ENST00000435064	2588	17	34	5	hsa-miR-30c-2-3p,hsa-miR-3192-5p,hsa-miR-4757-5p,hsa-miR-6744-3p,hsa-miR-6788-5p	1.59599e-06	5.01871e-05	22.3875
12:98773042|98801125//ENST00000333732	ENST00000435064	2588	11	34	4	hsa-miR-1285-3p,hsa-miR-3187-5p,hsa-miR-5189-5p,hsa-miR-6860	7.68789e-06	0.000195746	27.6791
16:3504720|3512478//ENST00000574369	ENST00000435064	2588	10	34	3	hsa-miR-3187-5p,hsa-miR-6764-5p,hsa-miR-6860	0.000233611	0.00338033	22.8353
4:94573351|94586444//ENST00000437932	ENST00000435064	2588	11	34	4	hsa-miR-1910-5p,hsa-miR-5189-5p,hsa-miR-612,hsa-miR-6860	7.68789e-06	0.000195746	27.6791
12:98773042|98801125//ENST00000547362	ENST00000435064	2588	10	34	4	hsa-miR-1285-3p,hsa-miR-3187-5p,hsa-miR-5189-5p,hsa-miR-6860	4.93814e-06	0.000133776	30.4471
4:94573351|94586444//ENST00000318007	ENST00000435064	2588	10	34	4	hsa-miR-1910-5p,hsa-miR-5189-5p,hsa-miR-612,hsa-miR-6860	4.93814e-06	0.000133776	30.4471
9:75932379|76027037//ENST00000376752	ENST00000435064	2588	11	34	3	hsa-miR-5189-5p,hsa-miR-612,hsa-miR-6860	0.000318332	0.00433471	20.7594
13:45411362|45411938//ENST00000310862	ENST00000435064	2588	9	34	3	hsa-miR-1285-3p,hsa-miR-3187-5p,hsa-miR-6860	0.000165009	0.00255372	25.3725
18:13681605|13682105//ENST00000322247	ENST00000314583	2588	12	33	4	hsa-miR-4651,hsa-miR-5572,hsa-miR-6812-5p,hsa-miR-6819-5p	1.01059e-05	0.000247319	26.1414
4:86693587|86701801//ENST00000316707	ENST00000612800	2588	8	15	2	hsa-miR-106b-3p,hsa-miR-6858-5p	0.00086074	0.00946676	43.1333
12:56664776|56673065//ENST00000448157	ENST00000612800	2588	7	15	2	hsa-miR-212-5p,hsa-miR-6813-3p	0.000647724	0.00759015	49.2952
12:56671749|56673065//ENST00000456859	ENST00000612800	2588	6	15	2	hsa-miR-212-5p,hsa-miR-6813-3p	0.000464215	0.00584847	57.5111
12:56671749|56673065//ENST00000262033	ENST00000612800	2588	6	15	2	hsa-miR-212-5p,hsa-miR-6813-3p	0.000464215	0.00584847	57.5111
22:24302195|24313466//ENST00000314328	ENST00000383759	2588	17	12	3	hsa-miR-4688,hsa-miR-6743-5p,hsa-miR-6882-3p	4.99784e-05	0.000955537	38.0588
22:29970976|29979052//ENST00000333027	ENST00000525123	2588	11	8	2	hsa-miR-7157-3p,hsa-miR-8060	0.000453667	0.00574205	58.8182
22:31258291|31260077//ENST00000331728	ENST00000406520	2588	26	13	3	hsa-miR-214-3p,hsa-miR-3619-5p,hsa-miR-761	0.000241014	0.00346688	22.9704
2:31917926|31932135//ENST00000295065	ENST00000406520	2588	9	13	2	hsa-miR-6758-5p,hsa-miR-6856-5p	0.000822309	0.00913863	44.2393
11:47815479|47819458//ENST00000378460	ENST00000406520	2588	13	13	3	hsa-miR-214-3p,hsa-miR-3619-5p,hsa-miR-6856-5p	2.7534e-05	0.000579024	45.9408
15:77052385|77056255//ENST00000267970	ENST00000406520	2588	19	13	3	hsa-miR-3619-5p,hsa-miR-3940-3p,hsa-miR-761	9.16737e-05	0.00157903	31.4332
15:77052385|77056255//ENST00000346495	ENST00000406520	2588	18	13	3	hsa-miR-3619-5p,hsa-miR-3940-3p,hsa-miR-761	7.74239e-05	0.00137264	33.1795
11:120476661|120477526//ENST00000356641	ENST00000584573	2588	13	22	3	hsa-miR-4420,hsa-miR-6837-3p,hsa-miR-7156-3p	0.000144427	0.00229075	27.1469
2:99418828|99435941//ENST00000258428	ENST00000584573	2588	17	22	3	hsa-miR-30c-2-3p,hsa-miR-3192-5p,hsa-miR-6788-5p	0.000335889	0.00452468	20.7594
1:201857096|201858994//ENST00000361565	ENST00000584573	2588	15	22	4	hsa-miR-1199-5p,hsa-miR-4420,hsa-miR-6837-3p,hsa-miR-7108-5p	5.03501e-06	0.00013602	31.3697
2:99418828|99435941//ENST00000393445	ENST00000584573	2588	17	22	3	hsa-miR-30c-2-3p,hsa-miR-3192-5p,hsa-miR-6788-5p	0.000335889	0.00452468	20.7594
4:88475841|88494331//ENST00000264350	ENST00000584573	2588	17	22	4	hsa-miR-30c-1-3p,hsa-miR-30c-2-3p,hsa-miR-3192-5p,hsa-miR-6788-5p	8.68131e-06	0.000217085	27.6791
21:37108392|37132766//ENST00000494243	ENST00000440835	2588	22	12	4	hsa-miR-4525,hsa-miR-4665-5p,hsa-miR-5010-5p,hsa-miR-6870-3p	1.85677e-06	5.72467e-05	39.2121
11:68519501|68551186//ENST00000265636	ENST00000440835	2588	18	12	3	hsa-miR-4448,hsa-miR-6849-5p,hsa-miR-6870-3p	5.98172e-05	0.00110955	35.9444
5:74813840|74841679//ENST00000510609	ENST00000638451	2588	11	33	3	hsa-miR-106a-5p,hsa-miR-106b-5p,hsa-miR-20a-5p	0.000290922	0.00403265	21.3884
3:65018441|65050822//XLOC.132426.12	ENST00000638451	2588	46	33	15	hsa-miR-106a-5p,hsa-miR-106b-5p,hsa-miR-1273g-3p,hsa-miR-1304-3p,hsa-miR-20a-5p,hsa-miR-372-3p,hsa-miR-373-3p,hsa-miR-378a-5p,hsa-miR-4430,hsa-miR-4772-3p,hsa-miR-500b-3p,hsa-miR-619-5p,hsa-miR-640,hsa-miR-6747-3p,hsa-miR-93-5p	3.76303e-19	1.47308e-16	25.5731
12:56664776|56673065//ENST00000537473	ENST00000638451	2588	26	33	7	hsa-miR-1273f,hsa-miR-1304-3p,hsa-miR-212-5p,hsa-miR-378a-5p,hsa-miR-4772-3p,hsa-miR-5096,hsa-miR-619-5p	1.55149e-08	8.24803e-07	21.1142
X:154789954|154792285//ENST00000369534	ENST00000539847	2588	16	20	3	hsa-miR-3187-5p,hsa-miR-612,hsa-miR-6860	0.000207464	0.00307366	24.2625
4:94573351|94586444//ENST00000513341	ENST00000539847	2588	17	20	4	hsa-miR-2276-5p,hsa-miR-5189-5p,hsa-miR-612,hsa-miR-6860	5.79664e-06	0.00015361	30.4471
12:106842589|106851594//ENST00000355478	ENST00000539847	2588	11	20	3	hsa-miR-3187-5p,hsa-miR-612,hsa-miR-6860	6.26575e-05	0.00115261	35.2909
10:119838535|119842595//ENST00000360003	ENST00000539847	2588	9	20	4	hsa-miR-3187-5p,hsa-miR-5189-5p,hsa-miR-612,hsa-miR-6860	3.1933e-07	1.22025e-05	57.5111
15:66508841|66521205//ENST00000565627	ENST00000539847	2588	20	20	4	hsa-miR-3187-5p,hsa-miR-5189-5p,hsa-miR-612,hsa-miR-6860	1.16255e-05	0.000278779	25.88
6:109475399|109476930//ENST00000230122	ENST00000539847	2588	13	20	3	hsa-miR-5189-5p,hsa-miR-612,hsa-miR-6860	0.000107538	0.00179993	29.8615
9:75932379|75986245//ENST00000376752	ENST00000539847	2588	6	20	3	hsa-miR-5189-5p,hsa-miR-612,hsa-miR-6860	7.78493e-06	0.000197875	64.7
12:98773042|98801125//ENST00000333732	ENST00000539847	2588	11	20	3	hsa-miR-3187-5p,hsa-miR-5189-5p,hsa-miR-6860	6.26575e-05	0.00115261	35.2909
4:94573351|94586444//ENST00000437932	ENST00000539847	2588	11	20	3	hsa-miR-5189-5p,hsa-miR-612,hsa-miR-6860	6.26575e-05	0.00115261	35.2909
12:98773042|98801125//ENST00000547362	ENST00000539847	2588	10	20	3	hsa-miR-3187-5p,hsa-miR-5189-5p,hsa-miR-6860	4.57949e-05	0.000887411	38.82
7:75199651|75202613//ENST00000614592	ENST00000539847	2588	11	20	3	hsa-miR-2276-5p,hsa-miR-4665-5p,hsa-miR-8052	6.26575e-05	0.00115261	35.2909
12:50814010|50814439//ENST00000262053	ENST00000539847	2588	17	20	3	hsa-miR-3187-5p,hsa-miR-5189-5p,hsa-miR-612	0.000250679	0.00357646	22.8353
15:66508841|66521205//ENST00000307897	ENST00000539847	2588	21	20	4	hsa-miR-3187-5p,hsa-miR-5189-5p,hsa-miR-612,hsa-miR-6860	1.42897e-05	0.000332388	24.6476
4:94573351|94586444//ENST00000318007	ENST00000539847	2588	10	20	3	hsa-miR-5189-5p,hsa-miR-612,hsa-miR-6860	4.57949e-05	0.000887411	38.82
9:75932379|76027037//ENST00000376752	ENST00000539847	2588	11	20	3	hsa-miR-5189-5p,hsa-miR-612,hsa-miR-6860	6.26575e-05	0.00115261	35.2909
4:94573351|94586444//ENST00000380180	ENST00000539847	2588	17	20	4	hsa-miR-2276-5p,hsa-miR-5189-5p,hsa-miR-612,hsa-miR-6860	5.79664e-06	0.00015361	30.4471
2:183133566|183159652//ENST00000295119	ENST00000539847	2588	14	20	3	hsa-miR-5189-5p,hsa-miR-612,hsa-miR-6860	0.000136191	0.00218486	27.7286
15:48596283|48613092//ENST00000316623	ENST00000539847	2588	19	20	3	hsa-miR-323b-5p,hsa-miR-410-5p,hsa-miR-494-5p	0.000353703	0.00471303	20.4316
18:58696366|58700591//ENST00000345724	ENST00000412271	2588	5	18	2	hsa-miR-619-5p,hsa-miR-6506-5p	0.000451416	0.00572137	57.5111
17:78392476|78398351//ENST00000589426	ENST00000412271	2588	28	18	4	hsa-miR-4667-5p,hsa-miR-4731-5p,hsa-miR-6810-5p,hsa-miR-8089	3.02663e-05	0.000627429	20.5397
22:40552106|40594735//ENST00000355630	ENST00000412271	2588	25	18	4	hsa-miR-486-3p,hsa-miR-6512-3p,hsa-miR-6810-5p,hsa-miR-8089	1.89453e-05	0.000422471	23.0044
2:172568741|172596023//ENST00000282077	ENST00000412271	2588	14	18	3	hsa-miR-4667-5p,hsa-miR-4731-5p,hsa-miR-6810-5p	9.81106e-05	0.00166989	30.8095
2:201565729|201575326//ENST00000286195	ENST00000412271	2588	6	18	2	hsa-miR-6720-5p,hsa-miR-8089	0.000674333	0.00783635	47.9259
17:78392476|78398351//ENST00000262764	ENST00000412271	2588	32	18	5	hsa-miR-1226-3p,hsa-miR-4667-5p,hsa-miR-4731-5p,hsa-miR-6810-5p,hsa-miR-8089	1.59775e-06	5.02295e-05	22.4653
2:220753613|220776862//XLOC.113846.1	ENST00000412271	2588	29	18	5	hsa-miR-1226-3p,hsa-miR-4667-5p,hsa-miR-4731-5p,hsa-miR-6810-5p,hsa-miR-8089	9.54238e-07	3.20028e-05	24.7893
8:25332251|25336373//ENST00000467709	ENST00000305901	2588	7	14	2	hsa-miR-431-5p,hsa-miR-573	0.000562087	0.0067979	52.8163
X:32545159|32573846//ENST00000288447	ENST00000394287	2588	8	45	3	hsa-miR-6799-5p,hsa-miR-6825-5p,hsa-miR-6851-5p	0.000259022	0.00367347	21.5667
16:21315884|21317126//ENST00000338573	ENST00000394287	2588	3	45	2	hsa-miR-345-3p,hsa-miR-539-5p	0.000877374	0.00961067	38.3407
4:6996325|7004924//ENST00000409757	ENST00000367425	2588	16	6	2	hsa-miR-3120-5p,hsa-miR-6876-3p	0.000529983	0.00649161	53.9167
3:106920966|106927994//ENST00000484698	ENST00000430124	2588	10	12	2	hsa-miR-4722-5p,hsa-miR-6774-5p	0.000869077	0.00953846	43.1333
8:30680904|30700135//ENST00000546342	ENST00000430124	2588	29	12	3	hsa-miR-1915-3p,hsa-miR-4685-5p,hsa-miR-6764-5p	0.000260244	0.0036871	22.3103
8:30680904|30700135//ENST00000541648	ENST00000430124	2588	29	12	3	hsa-miR-1915-3p,hsa-miR-4685-5p,hsa-miR-6764-5p	0.000260244	0.0036871	22.3103
8:30680904|30700135//ENST00000537535	ENST00000430124	2588	23	12	3	hsa-miR-1915-3p,hsa-miR-4685-5p,hsa-miR-6764-5p	0.000128134	0.00207726	28.1304
19:34490376|34495771//ENST00000585928	ENST00000430124	2588	31	12	3	hsa-miR-3918,hsa-miR-4685-5p,hsa-miR-6764-5p	0.000318466	0.00433572	20.871
3:105670233|105685466//ENST00000264122	ENST00000372418	2588	41	6	3	hsa-miR-4654,hsa-miR-4769-5p,hsa-miR-6756-5p	7.14679e-05	0.00128427	31.561
1:70417937|70424416//ENST00000370938	ENST00000372418	2588	7	6	2	hsa-miR-6756-5p,hsa-miR-92a-2-5p	9.36136e-05	0.00160661	123.238
12:81109560|81152096//ENST00000261206	ENST00000372418	2588	18	6	2	hsa-miR-4654,hsa-miR-4769-5p	0.000674333	0.00783635	47.9259
11:112037273|112045230//ENST00000280346	ENST00000372418	2588	49	6	3	hsa-miR-6742-5p,hsa-miR-6756-5p,hsa-miR-92a-2-5p	0.000122654	0.00200511	26.4082
3:105670233|105685466//ENST00000394030	ENST00000372418	2588	33	6	3	hsa-miR-4654,hsa-miR-4769-5p,hsa-miR-6756-5p	3.68366e-05	0.000740043	39.2121
20:43613850|43624045//ENST00000373030	ENST00000596211	2588	19	4	2	hsa-miR-3189-3p,hsa-miR-769-3p	0.00030381	0.00417402	68.1053
2:185889509|185952902//XLOC.110929.5	ENST00000596211	2588	28	4	2	hsa-miR-4259,hsa-miR-615-5p	0.000668455	0.00778018	46.2143
3:195306511|195336976//ENST00000439758	ENST00000259748	2588	7	52	3	hsa-miR-1254,hsa-miR-3116,hsa-miR-6872-3p	0.000253147	0.00360574	21.3297
3:195306511|195336976//ENST00000326793	ENST00000259748	2588	7	52	3	hsa-miR-1254,hsa-miR-3116,hsa-miR-6872-3p	0.000253147	0.00360574	21.3297
3:195306511|195336976//ENST00000635383	ENST00000259748	2588	7	52	3	hsa-miR-1254,hsa-miR-3116,hsa-miR-6872-3p	0.000253147	0.00360574	21.3297
8:30680904|30700135//ENST00000546342	ENST00000532057	2588	29	5	3	hsa-miR-4685-5p,hsa-miR-6764-5p,hsa-miR-6837-5p	1.24725e-05	0.000295977	53.5448
8:30680904|30700135//ENST00000221130	ENST00000532057	2588	37	5	3	hsa-miR-4685-5p,hsa-miR-6764-5p,hsa-miR-6837-5p	2.63982e-05	0.000559068	41.9676
8:30680904|30700135//ENST00000541648	ENST00000532057	2588	29	5	3	hsa-miR-4685-5p,hsa-miR-6764-5p,hsa-miR-6837-5p	1.24725e-05	0.000295977	53.5448
8:30680904|30700135//ENST00000537535	ENST00000532057	2588	23	5	3	hsa-miR-4685-5p,hsa-miR-6764-5p,hsa-miR-6837-5p	6.06633e-06	0.000159663	67.513
13:95177707|95188542//ENST00000376887	ENST00000532057	2588	15	5	3	hsa-miR-4685-5p,hsa-miR-6764-5p,hsa-miR-6837-5p	1.56583e-06	4.935e-05	103.52
8:38429682|38429948//ENST00000335922	ENST00000532057	2588	25	5	2	hsa-miR-4685-5p,hsa-miR-6764-5p	0.000880331	0.00963109	41.408
16:68025415|68054617//ENST00000565263	ENST00000532057	2588	19	5	2	hsa-miR-4685-5p,hsa-miR-6837-5p	0.000504132	0.00624037	54.4842
X:16667514|16691620//ENST00000359276	ENST00000532057	2588	19	5	2	hsa-miR-4685-5p,hsa-miR-6837-5p	0.000504132	0.00624037	54.4842
7:158735503|158748280//ENST00000251527	ENST00000532057	2588	73	5	3	hsa-miR-4685-5p,hsa-miR-6764-5p,hsa-miR-6837-5p	0.000206877	0.00306734	21.2712
19:34490376|34495771//ENST00000585928	ENST00000532057	2588	31	5	3	hsa-miR-4685-5p,hsa-miR-6764-5p,hsa-miR-6837-5p	1.53252e-05	0.000352982	50.0903
11:94821530|94831541//ENST00000317829	ENST00000532057	2588	52	5	3	hsa-miR-4685-5p,hsa-miR-6764-5p,hsa-miR-6837-5p	7.44254e-05	0.00132769	29.8615
17:82127692|82134194//ENST00000392346	ENST00000269217	2588	68	13	10	hsa-miR-1249-5p,hsa-miR-4667-5p,hsa-miR-4728-5p,hsa-miR-6127,hsa-miR-6133,hsa-miR-6785-5p,hsa-miR-6797-5p,hsa-miR-6799-5p,hsa-miR-6883-5p,hsa-miR-8089	2.14112e-14	3.71748e-12	29.276
6:158448996|158452268//ENST00000367094	ENST00000269217	2588	19	13	4	hsa-miR-149-3p,hsa-miR-4728-5p,hsa-miR-6785-5p,hsa-miR-6883-5p	1.42511e-06	4.54434e-05	41.9109
8:47407861|47440542//ENST00000297423	ENST00000269217	2588	22	13	6	hsa-miR-1249-5p,hsa-miR-149-3p,hsa-miR-4728-5p,hsa-miR-6797-5p,hsa-miR-6883-5p,hsa-miR-8089	2.97301e-10	2.31281e-08	54.2937
22:41338313|41339191//ENST00000352645	ENST00000269217	2588	33	13	4	hsa-miR-149-3p,hsa-miR-4667-5p,hsa-miR-6785-5p,hsa-miR-8089	1.44664e-05	0.000335886	24.1305
3:105670233|105685466//ENST00000264122	ENST00000269217	2588	41	13	6	hsa-miR-1249-5p,hsa-miR-4728-5p,hsa-miR-6785-5p,hsa-miR-6797-5p,hsa-miR-6799-5p,hsa-miR-6883-5p	1.71359e-08	9.01761e-07	29.1332
6:138945219|138947913//ENST00000258062	ENST00000269217	2588	27	13	3	hsa-miR-4667-5p,hsa-miR-4700-5p,hsa-miR-8089	0.000270352	0.00380188	22.1197
10:118685983|118695230//ENST00000369151	ENST00000269217	2588	20	13	3	hsa-miR-1249-5p,hsa-miR-6127,hsa-miR-6133	0.000107538	0.00179993	29.8615
17:78392476|78398351//ENST00000589426	ENST00000269217	2588	28	13	4	hsa-miR-4667-5p,hsa-miR-4700-5p,hsa-miR-6799-5p,hsa-miR-8089	7.34073e-06	0.000188173	28.4396
11:89354962|89402542//ENST00000263317	ENST00000269217	2588	19	13	3	hsa-miR-149-3p,hsa-miR-6785-5p,hsa-miR-6883-5p	9.16737e-05	0.00157903	31.4332
3:4410865|4420146//ENST00000272902	ENST00000269217	2588	26	13	6	hsa-miR-1249-5p,hsa-miR-149-3p,hsa-miR-4728-5p,hsa-miR-6785-5p,hsa-miR-6797-5p,hsa-miR-6883-5p	9.08828e-10	6.37065e-08	45.9408
17:82563354|82571870//ENST00000527313	ENST00000269217	2588	34	13	4	hsa-miR-149-3p,hsa-miR-4728-5p,hsa-miR-6785-5p,hsa-miR-6883-5p	1.63493e-05	0.000372784	23.4208
21:37420299|37496258//ENST00000339659	ENST00000269217	2588	49	13	5	hsa-miR-1249-5p,hsa-miR-149-3p,hsa-miR-4728-5p,hsa-miR-6797-5p,hsa-miR-6883-5p	2.27135e-06	6.82635e-05	20.314
1:35470863|35479212//ENST00000325722	ENST00000269217	2588	16	13	4	hsa-miR-1249-5p,hsa-miR-6127,hsa-miR-6133,hsa-miR-6797-5p	6.74809e-07	2.36102e-05	49.7692
2:58198579|58232112//ENST00000402135	ENST00000269217	2588	18	13	3	hsa-miR-4667-5p,hsa-miR-4700-5p,hsa-miR-8089	7.74239e-05	0.00137264	33.1795
1:35470863|35479212//ENST00000431916	ENST00000269217	2588	13	13	4	hsa-miR-1249-5p,hsa-miR-6127,hsa-miR-6133,hsa-miR-6797-5p	2.67337e-07	1.04263e-05	61.2544
10:118685983|118695230//ENST00000493518	ENST00000269217	2588	20	13	3	hsa-miR-1249-5p,hsa-miR-6127,hsa-miR-6133	0.000107538	0.00179993	29.8615
3:172112452|172251541//ENST00000336824	ENST00000269217	2588	70	13	9	hsa-miR-1249-5p,hsa-miR-4667-5p,hsa-miR-4700-5p,hsa-miR-6127,hsa-miR-6133,hsa-miR-6785-5p,hsa-miR-6797-5p,hsa-miR-6883-5p,hsa-miR-8089	3.01432e-12	3.48996e-10	25.5956
2:201565729|201575326//ENST00000286195	ENST00000269217	2588	6	13	2	hsa-miR-4700-5p,hsa-miR-8089	0.000345559	0.0046293	66.359
17:78392476|78398351//ENST00000262764	ENST00000269217	2588	32	13	4	hsa-miR-4667-5p,hsa-miR-4700-5p,hsa-miR-6799-5p,hsa-miR-8089	1.27486e-05	0.000301584	24.8846
2:121503167|121530325//ENST00000263710	ENST00000269217	2588	22	13	3	hsa-miR-4667-5p,hsa-miR-4700-5p,hsa-miR-8089	0.000144427	0.00229075	27.1469
11:9989497|10002689//ENST00000256190	ENST00000269217	2588	37	13	6	hsa-miR-1249-5p,hsa-miR-149-3p,hsa-miR-4728-5p,hsa-miR-6785-5p,hsa-miR-6797-5p,hsa-miR-6883-5p	8.94349e-09	5.02737e-07	32.2827
16:27346467|27352696//ENST00000170630	ENST00000269217	2588	20	13	4	hsa-miR-1249-5p,hsa-miR-6133,hsa-miR-6797-5p,hsa-miR-6883-5p	1.77641e-06	5.51157e-05	39.8154
17:16098367|16101805//ENST00000395848	ENST00000269217	2588	39	13	4	hsa-miR-1249-5p,hsa-miR-6127,hsa-miR-6133,hsa-miR-6797-5p	2.85922e-05	0.000597724	20.4181
3:105670233|105685466//ENST00000394030	ENST00000269217	2588	33	13	6	hsa-miR-1249-5p,hsa-miR-4728-5p,hsa-miR-6785-5p,hsa-miR-6797-5p,hsa-miR-6799-5p,hsa-miR-6883-5p	4.301e-09	2.5976e-07	36.1958
4:3186597|3189093//ENST00000355072	ENST00000269217	2588	17	13	4	hsa-miR-1249-5p,hsa-miR-6127,hsa-miR-6133,hsa-miR-6797-5p	8.79978e-07	2.98013e-05	46.8416
21:37420299|37496258//ENST00000338785	ENST00000269217	2588	49	13	5	hsa-miR-1249-5p,hsa-miR-149-3p,hsa-miR-4728-5p,hsa-miR-6797-5p,hsa-miR-6883-5p	2.27135e-06	6.82635e-05	20.314
10:110100625|110112915//ENST00000497125	ENST00000461406	2588	9	27	3	hsa-miR-6779-5p,hsa-miR-6780a-5p,hsa-miR-7106-5p	8.16519e-05	0.00143467	31.9506
13:60439688|60460540//ENST00000196169	ENST00000461406	2588	2	27	2	hsa-miR-362-5p,hsa-miR-766-5p	0.000104852	0.00176318	95.8519
10:110100625|110112915//ENST00000277900	ENST00000461406	2588	10	27	3	hsa-miR-6779-5p,hsa-miR-6780a-5p,hsa-miR-7106-5p	0.000115834	0.00191385	28.7556
13:60439688|60460540//ENST00000377881	ENST00000461406	2588	2	27	2	hsa-miR-362-5p,hsa-miR-766-5p	0.000104852	0.00176318	95.8519
9:123667026|123879021//ENST00000373620	ENST00000336686	2588	12	30	3	hsa-miR-1909-5p,hsa-miR-219b-3p,hsa-miR-6757-5p	0.000288402	0.00400612	21.5667
9:123652013|123879021//ENST00000373620	ENST00000336686	2588	12	30	3	hsa-miR-1909-5p,hsa-miR-219b-3p,hsa-miR-6757-5p	0.000288402	0.00400612	21.5667
9:123667026|123879021//ENST00000373618	ENST00000336686	2588	11	30	3	hsa-miR-1909-5p,hsa-miR-219b-3p,hsa-miR-6757-5p	0.000218006	0.00319787	23.5273
9:123652013|123879021//ENST00000373618	ENST00000336686	2588	11	30	3	hsa-miR-1909-5p,hsa-miR-219b-3p,hsa-miR-6757-5p	0.000218006	0.00319787	23.5273
4:88475841|88494331//ENST00000264350	ENST00000454109	2588	17	7	2	hsa-miR-671-5p,hsa-miR-6745	0.000836792	0.00926133	43.4958
10:115215697|115334419//ENST00000355044	ENST00000454109	2588	37	7	3	hsa-miR-509-3-5p,hsa-miR-509-5p,hsa-miR-671-5p	9.05813e-05	0.00156418	29.9768
2:171325841|171331867//ENST00000392604	ENST00000370197	2588	3	11	2	hsa-miR-574-5p,hsa-miR-6764-3p	4.9175e-05	0.000942669	156.848
2:171325841|171331867//ENST00000375258	ENST00000370197	2588	6	11	2	hsa-miR-574-5p,hsa-miR-6764-3p	0.000244168	0.00350153	78.4242
3:121045435|121157627//ENST00000273666	ENST00000370197	2588	8	11	2	hsa-miR-3692-3p,hsa-miR-4539	0.000453667	0.00574205	58.8182
13:41907586|41912168//ENST00000281496	ENST00000370197	2588	6	11	2	hsa-miR-4539,hsa-miR-7158-3p	0.000244168	0.00350153	78.4242
5:154026399|154034967//ENST00000351797	ENST00000370197	2588	32	11	3	hsa-miR-4691-3p,hsa-miR-6764-3p,hsa-miR-6824-3p	0.000265093	0.00374343	22.0568
19:10637644|10638315//ENST00000591194	ENST00000397709	2588	16	38	7	hsa-miR-4524b-3p,hsa-miR-4673,hsa-miR-608,hsa-miR-6748-5p,hsa-miR-6769a-5p,hsa-miR-6769b-5p,hsa-miR-6782-5p	8.57783e-10	6.04683e-08	29.7961
19:10637644|10638315//ENST00000335757	ENST00000397709	2588	18	38	7	hsa-miR-4524b-3p,hsa-miR-4673,hsa-miR-608,hsa-miR-6748-5p,hsa-miR-6769a-5p,hsa-miR-6769b-5p,hsa-miR-6782-5p	2.33622e-09	1.4974e-07	26.4854
13:95177707|95188542//ENST00000376887	ENST00000371785	2588	15	59	7	hsa-miR-128-1-5p,hsa-miR-128-2-5p,hsa-miR-4685-5p,hsa-miR-4793-3p,hsa-miR-6764-5p,hsa-miR-6825-3p,hsa-miR-6829-5p	1.24421e-08	6.76388e-07	20.4701
X:154789954|154792285//ENST00000369534	ENST00000367249	2588	16	38	6	hsa-miR-1207-5p,hsa-miR-3187-5p,hsa-miR-4763-3p,hsa-miR-612,hsa-miR-6721-5p,hsa-miR-6860	4.78851e-08	2.2591e-06	25.5395
10:119838535|119842595//ENST00000360003	ENST00000367249	2588	9	38	4	hsa-miR-3187-5p,hsa-miR-5189-5p,hsa-miR-612,hsa-miR-6860	4.73046e-06	0.000128968	30.269
9:75932379|75986245//ENST00000376752	ENST00000367249	2588	6	38	3	hsa-miR-5189-5p,hsa-miR-612,hsa-miR-6860	5.67069e-05	0.00106121	34.0526
12:98773042|98801125//ENST00000333732	ENST00000367249	2588	11	38	4	hsa-miR-1285-3p,hsa-miR-3187-5p,hsa-miR-5189-5p,hsa-miR-6860	1.213e-05	0.000289125	24.7656
22:24302195|24313466//ENST00000314328	ENST00000367249	2588	17	38	5	hsa-miR-1207-5p,hsa-miR-1909-3p,hsa-miR-4763-3p,hsa-miR-6721-5p,hsa-miR-6722-3p	2.83435e-06	8.27394e-05	20.031
4:128077788|128082305//ENST00000326639	ENST00000367249	2588	8	38	4	hsa-miR-1199-5p,hsa-miR-212-5p,hsa-miR-6751-3p,hsa-miR-6857-3p	2.65598e-06	7.81947e-05	34.0526
12:98773042|98801125//ENST00000547362	ENST00000367249	2588	10	38	4	hsa-miR-1285-3p,hsa-miR-3187-5p,hsa-miR-5189-5p,hsa-miR-6860	7.80116e-06	0.000198219	27.2421
4:94573351|94586444//ENST00000318007	ENST00000367249	2588	10	38	3	hsa-miR-5189-5p,hsa-miR-612,hsa-miR-6860	0.000326653	0.00442537	20.4316
9:75932379|76027037//ENST00000376752	ENST00000367249	2588	11	38	4	hsa-miR-4763-3p,hsa-miR-5189-5p,hsa-miR-612,hsa-miR-6860	1.213e-05	0.000289125	24.7656
13:45411362|45411938//ENST00000310862	ENST00000367249	2588	9	38	3	hsa-miR-1285-3p,hsa-miR-3187-5p,hsa-miR-6860	0.000230997	0.00335066	22.7018
12:22482557|22506819//ENST00000545552	ENST00000342951	2588	17	5	2	hsa-miR-1183,hsa-miR-873-5p	0.00040157	0.00521409	60.8941
12:22482557|22506819//ENST00000333957	ENST00000342951	2588	15	5	2	hsa-miR-1183,hsa-miR-873-5p	0.000310517	0.00424925	69.0133
5:157359005|157361598//ENST00000435847	ENST00000377773	2588	29	9	3	hsa-miR-298,hsa-miR-3155a,hsa-miR-3155b	0.000101646	0.00171877	29.7471
3:98768430|98773983//ENST00000394162	ENST00000377773	2588	10	9	2	hsa-miR-6758-5p,hsa-miR-6856-5p	0.000476988	0.00597324	57.5111
12:96323948|96334865//ENST00000261211	ENST00000377773	2588	11	9	2	hsa-miR-5189-5p,hsa-miR-6860	0.000581933	0.00698748	52.2828
10:119838535|119842595//ENST00000360003	ENST00000377773	2588	9	9	2	hsa-miR-5189-5p,hsa-miR-6860	0.000382281	0.00501236	63.9012
3:98768430|98773983//ENST00000265261	ENST00000377773	2588	13	9	2	hsa-miR-6758-5p,hsa-miR-6856-5p	0.000822309	0.00913863	44.2393
3:111112030|111126335//ENST00000319792	ENST00000377773	2588	13	9	3	hsa-miR-3155a,hsa-miR-3155b,hsa-miR-5189-5p	8.18152e-06	0.000206523	66.359
6:109475399|109476930//ENST00000230122	ENST00000377773	2588	13	9	2	hsa-miR-5189-5p,hsa-miR-6860	0.000822309	0.00913863	44.2393
9:75932379|75986245//ENST00000376752	ENST00000377773	2588	6	9	2	hsa-miR-5189-5p,hsa-miR-6860	0.000160149	0.00249313	95.8519
6:169762429|169769713//ENST00000366772	ENST00000377773	2588	10	9	2	hsa-miR-3155a,hsa-miR-3155b	0.000476988	0.00597324	57.5111
6:169762429|169769713//ENST00000588451	ENST00000377773	2588	10	9	2	hsa-miR-3155a,hsa-miR-3155b	0.000476988	0.00597324	57.5111
12:98773042|98801125//ENST00000333732	ENST00000377773	2588	11	9	2	hsa-miR-5189-5p,hsa-miR-6860	0.000581933	0.00698748	52.2828
4:94573351|94586444//ENST00000437932	ENST00000377773	2588	11	9	2	hsa-miR-5189-5p,hsa-miR-6860	0.000581933	0.00698748	52.2828
16:8801799|8806407//ENST00000568602	ENST00000377773	2588	12	9	2	hsa-miR-3155a,hsa-miR-3155b	0.000697058	0.00803827	47.9259
12:98773042|98801125//ENST00000547362	ENST00000377773	2588	10	9	2	hsa-miR-5189-5p,hsa-miR-6860	0.000476988	0.00597324	57.5111
12:31451940|31495919//ENST00000354285	ENST00000377773	2588	47	9	4	hsa-miR-5189-5p,hsa-miR-6758-5p,hsa-miR-6856-5p,hsa-miR-6860	1.12708e-05	0.00027151	24.4728
2:31917926|31932135//ENST00000295065	ENST00000377773	2588	9	9	3	hsa-miR-493-3p,hsa-miR-6758-5p,hsa-miR-6856-5p	2.41979e-06	7.21013e-05	95.8519
4:94573351|94586444//ENST00000318007	ENST00000377773	2588	10	9	2	hsa-miR-5189-5p,hsa-miR-6860	0.000476988	0.00597324	57.5111
9:75932379|76027037//ENST00000376752	ENST00000377773	2588	11	9	2	hsa-miR-5189-5p,hsa-miR-6860	0.000581933	0.00698748	52.2828
2:168063500|168129758//ENST00000355999	ENST00000330498	2588	12	30	3	hsa-miR-541-3p,hsa-miR-6724-5p,hsa-miR-6773-5p	0.000288402	0.00400612	21.5667
7:128574720|128592017//ENST00000479267	ENST00000581870	2588	20	6	2	hsa-miR-383-3p,hsa-miR-6501-3p	0.000835676	0.00925566	43.1333
12:22490123|22506819//ENST00000535555	ENST00000264750	2588	9	39	3	hsa-miR-4637,hsa-miR-6808-5p,hsa-miR-766-5p	0.000249809	0.00356668	22.1197
6:163455279|163478896//ENST00000545346	ENST00000315906	2588	6	15	2	hsa-miR-150-5p,hsa-miR-629-3p	0.000464215	0.00584847	57.5111
16:66608309|66610003//ENST00000361909	ENST00000271889	2588	24	13	3	hsa-miR-4726-5p,hsa-miR-6511a-5p,hsa-miR-671-5p	0.000188716	0.00284741	24.8846
10:86467279|86473973//ENST00000263070	ENST00000271889	2588	22	13	4	hsa-miR-1226-5p,hsa-miR-4436b-3p,hsa-miR-6735-5p,hsa-miR-6879-5p	2.66705e-06	7.84562e-05	36.1958
19:9652953|9660874//ENST00000590155	ENST00000271889	2588	29	13	3	hsa-miR-573,hsa-miR-6735-5p,hsa-miR-6812-5p	0.00033577	0.00452454	20.5942
5:113082860|113085310//ENST00000302475	ENST00000271889	2588	26	13	3	hsa-miR-4640-5p,hsa-miR-573,hsa-miR-6840-3p	0.000241014	0.00346688	22.9704
12:103733006|103737780//ENST00000388887	ENST00000271889	2588	36	13	4	hsa-miR-4514,hsa-miR-4640-5p,hsa-miR-4726-5p,hsa-miR-6812-5p	2.06499e-05	0.000454503	22.1197
1:11068008|11076948//ENST00000376936	ENST00000271889	2588	19	13	4	hsa-miR-1226-5p,hsa-miR-4436b-3p,hsa-miR-4640-5p,hsa-miR-6735-5p	1.42511e-06	4.54434e-05	41.9109
1:11068008|11076948//ENST00000474216	ENST00000271889	2588	20	13	4	hsa-miR-1226-5p,hsa-miR-4436b-3p,hsa-miR-4640-5p,hsa-miR-6735-5p	1.77641e-06	5.51157e-05	39.8154
17:50736960|50741731//ENST00000240304	ENST00000271889	2588	5	13	2	hsa-miR-4640-5p,hsa-miR-4726-5p	0.000231028	0.00335067	79.6308
16:77353733|77367723//ENST00000282849	ENST00000271889	2588	39	13	5	hsa-miR-1226-5p,hsa-miR-4436b-3p,hsa-miR-4640-5p,hsa-miR-4726-5p,hsa-miR-6735-5p	7.03937e-07	2.45018e-05	25.5227
2:74304489|74315025//ENST00000346834	ENST00000271889	2588	25	13	3	hsa-miR-4640-5p,hsa-miR-4726-5p,hsa-miR-671-5p	0.000213826	0.00314898	23.8892
19:9652953|9660874//ENST00000453372	ENST00000271889	2588	29	13	3	hsa-miR-573,hsa-miR-6735-5p,hsa-miR-6812-5p	0.00033577	0.00452454	20.5942
10:12117673|12120267//ENST00000263035	ENST00000396263	2588	8	14	2	hsa-miR-361-3p,hsa-miR-4747-5p	0.000747132	0.00847956	46.2143
4:39869394|39890364//ENST00000303538	ENST00000396263	2588	24	14	3	hsa-miR-4725-3p,hsa-miR-6780b-5p,hsa-miR-7107-3p	0.000238722	0.00343951	23.1071
8:30680904|30700135//ENST00000537535	ENST00000396263	2588	23	14	3	hsa-miR-1915-3p,hsa-miR-4685-5p,hsa-miR-6837-5p	0.000209552	0.00309826	24.1118
1:32279671|32280210//ENST00000469765	ENST00000396263	2588	30	14	4	hsa-miR-3943,hsa-miR-4661-3p,hsa-miR-6753-3p,hsa-miR-7107-3p	1.35684e-05	0.000318032	24.6476
4:39874289|39890364//ENST00000303538	ENST00000396263	2588	18	14	3	hsa-miR-4725-3p,hsa-miR-6780b-5p,hsa-miR-7107-3p	9.81106e-05	0.00166989	30.8095
3:66243203|66263379//ENST00000336733	ENST00000310123	2588	6	45	3	hsa-miR-1914-5p,hsa-miR-2467-3p,hsa-miR-6889-3p	9.48001e-05	0.00162277	28.7556
17:37283267|37289528//ENST00000615229	ENST00000307221	2588	8	39	3	hsa-miR-3135b,hsa-miR-3934-5p,hsa-miR-676-5p	0.000168293	0.00259577	24.8846
21:28986139|28986934//ENST00000361371	ENST00000307221	2588	8	39	3	hsa-miR-29a-3p,hsa-miR-29b-3p,hsa-miR-29c-3p	0.000168293	0.00259577	24.8846
9:131506114|131506453//ENST00000341012	ENST00000307221	2588	8	39	3	hsa-miR-29a-3p,hsa-miR-29b-3p,hsa-miR-29c-3p	0.000168293	0.00259577	24.8846
7:137912991|137916012//ENST00000330387	ENST00000541973	2588	17	15	4	hsa-miR-6751-5p,hsa-miR-6803-5p,hsa-miR-6864-5p,hsa-miR-7974	1.66644e-06	5.21176e-05	40.5961
X:40588986|40597664//ENST00000636574	ENST00000541973	2588	24	15	5	hsa-miR-4723-5p,hsa-miR-6751-5p,hsa-miR-6803-5p,hsa-miR-6835-5p,hsa-miR-7111-5p	1.24538e-07	5.295e-06	35.9444
1:236032401|236038253//ENST00000264187	ENST00000541973	2588	19	15	3	hsa-miR-6716-5p,hsa-miR-6762-5p,hsa-miR-6845-5p	0.000144494	0.00229133	27.2421
X:40588986|40597664//ENST00000378438	ENST00000541973	2588	25	15	5	hsa-miR-4723-5p,hsa-miR-6751-5p,hsa-miR-6803-5p,hsa-miR-6835-5p,hsa-miR-7111-5p	1.55168e-07	6.43582e-06	34.5067
X:40588986|40597664//ENST00000636287	ENST00000541973	2588	24	15	5	hsa-miR-4723-5p,hsa-miR-6751-5p,hsa-miR-6803-5p,hsa-miR-6835-5p,hsa-miR-7111-5p	1.24538e-07	5.295e-06	35.9444
3:111913319|111920419//ENST00000393923	ENST00000541973	2588	32	15	4	hsa-miR-6751-5p,hsa-miR-6803-5p,hsa-miR-6835-5p,hsa-miR-6881-5p	2.39183e-05	0.000514373	21.5667
2:216141186|216148276//ENST00000392132	ENST00000541973	2588	8	15	3	hsa-miR-6751-5p,hsa-miR-6803-5p,hsa-miR-6835-5p	8.67734e-06	0.000217018	64.7
7:74705164|74718941//ENST00000614986	ENST00000541973	2588	5	15	2	hsa-miR-6762-5p,hsa-miR-6864-5p	0.000310517	0.00424925	69.0133
17:50736960|50741731//ENST00000240304	ENST00000335230	2588	5	22	2	hsa-miR-4640-5p,hsa-miR-4726-5p	0.000679436	0.00788438	47.0545
2:58198579|58232112//ENST00000402135	ENST00000335230	2588	18	22	4	hsa-miR-4667-5p,hsa-miR-4700-5p,hsa-miR-7106-5p,hsa-miR-8089	1.10994e-05	0.000267951	26.1414
2:121503167|121530325//ENST00000263710	ENST00000335230	2588	22	22	4	hsa-miR-4667-5p,hsa-miR-4700-5p,hsa-miR-6857-5p,hsa-miR-8089	2.59461e-05	0.000550862	21.3884
15:66508841|66521205//ENST00000565627	ENST00000391417	2588	20	18	3	hsa-miR-6735-5p,hsa-miR-6807-5p,hsa-miR-936	0.000299331	0.00412563	21.5667
17:50736960|50741731//ENST00000240304	ENST00000391417	2588	5	18	2	hsa-miR-4640-5p,hsa-miR-4726-5p	0.000451416	0.00572137	57.5111
15:66508841|66521205//ENST00000307897	ENST00000391417	2588	21	18	3	hsa-miR-6735-5p,hsa-miR-6807-5p,hsa-miR-936	0.0003477	0.00465132	20.5397
1:219179147|219211752//ENST00000366928	ENST00000371566	2588	12	25	5	hsa-miR-30b-3p,hsa-miR-3187-5p,hsa-miR-3192-5p,hsa-miR-6779-5p,hsa-miR-6860	4.17269e-08	1.99842e-06	43.1333
9:111914605|111926496//ENST00000374279	ENST00000371566	2588	9	25	3	hsa-miR-3192-5p,hsa-miR-6779-3p,hsa-miR-7851-3p	6.443e-05	0.00117944	34.5067
16:15776078|15786732//ENST00000300036	ENST00000371566	2588	11	25	5	hsa-miR-1273h-5p,hsa-miR-3689a-3p,hsa-miR-3689b-3p,hsa-miR-3689c,hsa-miR-7106-5p	2.44989e-08	1.24211e-06	47.0545
1:219179147|219211752//ENST00000474379	ENST00000371566	2588	10	25	3	hsa-miR-30b-3p,hsa-miR-3192-5p,hsa-miR-6779-5p	9.14558e-05	0.00157645	31.056
1:219179147|219211752//ENST00000477938	ENST00000371566	2588	10	25	3	hsa-miR-30b-3p,hsa-miR-3192-5p,hsa-miR-6779-5p	9.14558e-05	0.00157645	31.056
10:110100625|110112915//ENST00000497125	ENST00000371566	2588	9	25	4	hsa-miR-30b-3p,hsa-miR-3192-5p,hsa-miR-6779-5p,hsa-miR-7106-5p	8.27289e-07	2.82407e-05	46.0089
9:111914605|111926496//ENST00000495085	ENST00000371566	2588	9	25	3	hsa-miR-3192-5p,hsa-miR-6779-3p,hsa-miR-7851-3p	6.443e-05	0.00117944	34.5067
12:106842589|106851594//ENST00000355478	ENST00000371566	2588	11	25	3	hsa-miR-3187-5p,hsa-miR-612,hsa-miR-6860	0.00012495	0.00203542	28.2327
10:119838535|119842595//ENST00000360003	ENST00000371566	2588	9	25	4	hsa-miR-3187-5p,hsa-miR-5189-5p,hsa-miR-612,hsa-miR-6860	8.27289e-07	2.82407e-05	46.0089
15:66508841|66521205//ENST00000565627	ENST00000371566	2588	20	25	5	hsa-miR-3187-5p,hsa-miR-5189-5p,hsa-miR-612,hsa-miR-6860,hsa-miR-7106-5p	7.7555e-07	2.66811e-05	25.88
6:109475399|109476930//ENST00000230122	ENST00000371566	2588	13	25	3	hsa-miR-5189-5p,hsa-miR-612,hsa-miR-6860	0.000213826	0.00314898	23.8892
16:15776078|15786732//ENST00000396324	ENST00000371566	2588	13	25	5	hsa-miR-1273h-5p,hsa-miR-3689a-3p,hsa-miR-3689b-3p,hsa-miR-3689c,hsa-miR-7106-5p	6.73682e-08	3.06452e-06	39.8154
9:75932379|75986245//ENST00000376752	ENST00000371566	2588	6	25	3	hsa-miR-5189-5p,hsa-miR-612,hsa-miR-6860	1.56379e-05	0.000359116	51.76
1:219179147|219211752//ENST00000463964	ENST00000371566	2588	12	25	5	hsa-miR-30b-3p,hsa-miR-3187-5p,hsa-miR-3192-5p,hsa-miR-6779-5p,hsa-miR-6860	4.17269e-08	1.99842e-06	43.1333
12:98773042|98801125//ENST00000333732	ENST00000371566	2588	11	25	3	hsa-miR-3187-5p,hsa-miR-5189-5p,hsa-miR-6860	0.00012495	0.00203542	28.2327
10:110100625|110112915//ENST00000277900	ENST00000371566	2588	10	25	4	hsa-miR-30b-3p,hsa-miR-3192-5p,hsa-miR-6779-5p,hsa-miR-7106-5p	1.36985e-06	4.38899e-05	41.408
4:94573351|94586444//ENST00000437932	ENST00000371566	2588	11	25	3	hsa-miR-5189-5p,hsa-miR-612,hsa-miR-6860	0.00012495	0.00203542	28.2327
X:17687742|17692468//ENST00000380060	ENST00000371566	2588	36	25	7	hsa-miR-1273h-5p,hsa-miR-30b-3p,hsa-miR-3192-5p,hsa-miR-3689a-3p,hsa-miR-3689b-3p,hsa-miR-3689c,hsa-miR-7106-5p	2.19427e-08	1.1253e-06	20.1289
12:98773042|98801125//ENST00000547362	ENST00000371566	2588	10	25	3	hsa-miR-3187-5p,hsa-miR-5189-5p,hsa-miR-6860	9.14558e-05	0.00157645	31.056
15:66508841|66521205//ENST00000307897	ENST00000371566	2588	21	25	5	hsa-miR-3187-5p,hsa-miR-5189-5p,hsa-miR-612,hsa-miR-6860,hsa-miR-7106-5p	1.01133e-06	3.36708e-05	24.6476
4:94573351|94586444//ENST00000318007	ENST00000371566	2588	10	25	3	hsa-miR-5189-5p,hsa-miR-612,hsa-miR-6860	9.14558e-05	0.00157645	31.056
1:219179147|219211752//ENST00000460522	ENST00000371566	2588	10	25	3	hsa-miR-30b-3p,hsa-miR-3192-5p,hsa-miR-6779-5p	9.14558e-05	0.00157645	31.056
1:219179147|219211752//ENST00000366927	ENST00000371566	2588	12	25	5	hsa-miR-30b-3p,hsa-miR-3187-5p,hsa-miR-3192-5p,hsa-miR-6779-5p,hsa-miR-6860	4.17269e-08	1.99842e-06	43.1333
9:75932379|76027037//ENST00000376752	ENST00000371566	2588	11	25	3	hsa-miR-5189-5p,hsa-miR-612,hsa-miR-6860	0.00012495	0.00203542	28.2327
11:128758115|128768272//ENST00000527767	ENST00000371566	2588	21	25	5	hsa-miR-3689a-3p,hsa-miR-3689b-3p,hsa-miR-3689c,hsa-miR-6779-5p,hsa-miR-7106-5p	1.01133e-06	3.36708e-05	24.6476
2:183133566|183159652//ENST00000295119	ENST00000371566	2588	14	25	3	hsa-miR-5189-5p,hsa-miR-612,hsa-miR-6860	0.000270408	0.0038023	22.1829
2:185889509|185952902//XLOC.110929.5	ENST00000371566	2588	28	25	8	hsa-miR-3187-5p,hsa-miR-3192-5p,hsa-miR-339-5p,hsa-miR-612,hsa-miR-6779-5p,hsa-miR-6860,hsa-miR-6894-5p,hsa-miR-7106-5p	6.05209e-11	5.4307e-09	29.5771
13:41727194|41778056//ENST00000281496	ENST00000507281	2588	6	19	2	hsa-miR-3929,hsa-miR-4419b	0.000752887	0.00853159	45.4035
7:5919849|5923962//ENST00000325974	ENST00000507281	2588	9	19	3	hsa-miR-3170,hsa-miR-4731-5p,hsa-miR-6855-5p	2.74309e-05	0.00057724	45.4035
X:23721881|23736016//ENST00000336430	ENST00000507281	2588	19	19	3	hsa-miR-3170,hsa-miR-6855-5p,hsa-miR-7155-5p	0.00030205	0.00415427	21.5069
4:102906536|102912129//ENST00000503584	ENST00000507281	2588	21	19	4	hsa-miR-3929,hsa-miR-4419b,hsa-miR-6884-5p,hsa-miR-922	1.14923e-05	0.000276074	25.9449
2:127989564|127989866//ENST00000259234	ENST00000507281	2588	19	19	3	hsa-miR-3170,hsa-miR-3929,hsa-miR-6855-5p	0.00030205	0.00415427	21.5069
X:23721881|23736016//ENST00000494361	ENST00000507281	2588	19	19	3	hsa-miR-3170,hsa-miR-6855-5p,hsa-miR-7155-5p	0.00030205	0.00415427	21.5069
X:23721881|23736016//ENST00000379303	ENST00000507281	2588	19	19	3	hsa-miR-3170,hsa-miR-6855-5p,hsa-miR-7155-5p	0.00030205	0.00415427	21.5069
2:241407537|241431774//ENST00000264042	ENST00000334036	2588	17	14	3	hsa-miR-2682-5p,hsa-miR-449b-5p,hsa-miR-449c-5p	8.20209e-05	0.00144	32.6218
14:105252507|105272894//ENST00000327359	ENST00000334036	2588	21	14	3	hsa-miR-2682-5p,hsa-miR-449b-5p,hsa-miR-449c-5p	0.000158382	0.00247022	26.4082
2:29131258|29135666//ENST00000456385	ENST00000334036	2588	7	14	2	hsa-miR-4738-3p,hsa-miR-4799-3p	0.000562087	0.0067979	52.8163
5:84060300|84066606//ENST00000296591	ENST00000334036	2588	24	14	3	hsa-miR-2682-5p,hsa-miR-449b-5p,hsa-miR-449c-5p	0.000238722	0.00343951	23.1071
11:118758774|118763306//ENST00000526070	ENST00000334036	2588	8	14	2	hsa-miR-449b-5p,hsa-miR-449c-5p	0.000747132	0.00847956	46.2143
15:49235851|49239367//ENST00000327171	ENST00000334036	2588	4	14	2	hsa-miR-2682-5p,hsa-miR-449c-5p	0.000162095	0.00251686	92.4286
12:22482557|22506819//ENST00000545552	ENST00000307128	2588	17	19	3	hsa-miR-3689b-3p,hsa-miR-3689c,hsa-miR-766-5p	0.000213946	0.00314991	24.0372
1:219179147|219211752//ENST00000366928	ENST00000307128	2588	12	19	3	hsa-miR-6779-5p,hsa-miR-6780a-5p,hsa-miR-6860	7.08471e-05	0.00127494	34.0526
16:15776078|15786732//ENST00000300036	ENST00000307128	2588	11	19	4	hsa-miR-3689a-3p,hsa-miR-3689b-3p,hsa-miR-3689c,hsa-miR-7106-5p	6.639e-07	2.32713e-05	49.5311
10:110100625|110112915//ENST00000497125	ENST00000307128	2588	9	19	3	hsa-miR-6779-5p,hsa-miR-6780a-5p,hsa-miR-7106-5p	2.74309e-05	0.00057724	45.4035
4:94573351|94586444//ENST00000513341	ENST00000307128	2588	17	19	5	hsa-miR-1910-5p,hsa-miR-5189-5p,hsa-miR-612,hsa-miR-6860,hsa-miR-942-5p	7.07092e-08	3.19939e-06	40.0619
10:119838535|119842595//ENST00000360003	ENST00000307128	2588	9	19	3	hsa-miR-5189-5p,hsa-miR-612,hsa-miR-6860	2.74309e-05	0.00057724	45.4035
15:66508841|66521205//ENST00000565627	ENST00000307128	2588	20	19	4	hsa-miR-5189-5p,hsa-miR-612,hsa-miR-6860,hsa-miR-7106-5p	9.34681e-06	0.000231176	27.2421
6:109475399|109476930//ENST00000230122	ENST00000307128	2588	13	19	3	hsa-miR-5189-5p,hsa-miR-612,hsa-miR-6860	9.16737e-05	0.00157903	31.4332
16:15776078|15786732//ENST00000396324	ENST00000307128	2588	13	19	4	hsa-miR-3689a-3p,hsa-miR-3689b-3p,hsa-miR-3689c,hsa-miR-7106-5p	1.42511e-06	4.54434e-05	41.9109
9:75932379|75986245//ENST00000376752	ENST00000307128	2588	6	19	3	hsa-miR-5189-5p,hsa-miR-612,hsa-miR-6860	6.62298e-06	0.000172328	68.1053
1:219179147|219211752//ENST00000463964	ENST00000307128	2588	12	19	3	hsa-miR-6779-5p,hsa-miR-6780a-5p,hsa-miR-6860	7.08471e-05	0.00127494	34.0526
10:110100625|110112915//ENST00000277900	ENST00000307128	2588	10	19	3	hsa-miR-6779-5p,hsa-miR-6780a-5p,hsa-miR-7106-5p	3.90051e-05	0.000776297	40.8632
4:94573351|94586444//ENST00000437932	ENST00000307128	2588	11	19	4	hsa-miR-1910-5p,hsa-miR-5189-5p,hsa-miR-612,hsa-miR-6860	6.639e-07	2.32713e-05	49.5311
X:17687742|17692468//ENST00000380060	ENST00000307128	2588	36	19	6	hsa-miR-3689a-3p,hsa-miR-3689b-3p,hsa-miR-3689c,hsa-miR-6780a-5p,hsa-miR-7106-5p,hsa-miR-766-5p	1.11825e-07	4.81231e-06	22.7018
12:22482557|22506819//ENST00000333957	ENST00000307128	2588	15	19	3	hsa-miR-3689b-3p,hsa-miR-3689c,hsa-miR-766-5p	0.000144494	0.00229133	27.2421
15:66508841|66521205//ENST00000307897	ENST00000307128	2588	21	19	4	hsa-miR-5189-5p,hsa-miR-612,hsa-miR-6860,hsa-miR-7106-5p	1.14923e-05	0.000276074	25.9449
4:94573351|94586444//ENST00000318007	ENST00000307128	2588	10	19	4	hsa-miR-1910-5p,hsa-miR-5189-5p,hsa-miR-612,hsa-miR-6860	4.24455e-07	1.56838e-05	54.4842
1:219179147|219211752//ENST00000366927	ENST00000307128	2588	12	19	3	hsa-miR-6779-5p,hsa-miR-6780a-5p,hsa-miR-6860	7.08471e-05	0.00127494	34.0526
9:75932379|76027037//ENST00000376752	ENST00000307128	2588	11	19	3	hsa-miR-5189-5p,hsa-miR-612,hsa-miR-6860	5.33831e-05	0.00100921	37.1483
4:94573351|94586444//ENST00000380180	ENST00000307128	2588	17	19	5	hsa-miR-1910-5p,hsa-miR-5189-5p,hsa-miR-612,hsa-miR-6860,hsa-miR-942-5p	7.07092e-08	3.19939e-06	40.0619
11:128758115|128768272//ENST00000527767	ENST00000307128	2588	21	19	5	hsa-miR-3689a-3p,hsa-miR-3689b-3p,hsa-miR-3689c,hsa-miR-6779-5p,hsa-miR-7106-5p	2.28341e-07	9.0667e-06	32.4311
2:183133566|183159652//ENST00000295119	ENST00000307128	2588	14	19	3	hsa-miR-5189-5p,hsa-miR-612,hsa-miR-6860	0.000116134	0.00191738	29.188
6:160397979|160410846//ENST00000275300	ENST00000307128	2588	33	19	5	hsa-miR-378j,hsa-miR-5189-5p,hsa-miR-612,hsa-miR-6860,hsa-miR-766-5p	2.52179e-06	7.47566e-05	20.638
12:68690631|68715740//ENST00000229179	ENST00000307128	2588	20	19	3	hsa-miR-22-3p,hsa-miR-6871-5p,hsa-miR-942-5p	0.000353703	0.00471303	20.4316
1:70417937|70424416//ENST00000370938	ENST00000397227	2588	7	35	4	hsa-miR-193b-5p,hsa-miR-6756-5p,hsa-miR-6855-5p,hsa-miR-92a-2-5p	9.54697e-07	3.20166e-05	42.2531
3:138263739|138274544//ENST00000466762	ENST00000397227	2588	7	35	3	hsa-miR-193b-5p,hsa-miR-3155a,hsa-miR-6855-5p	7.64792e-05	0.0013586	31.6898
5:74813840|74841679//ENST00000510609	ENST00000300035	2588	11	56	5	hsa-miR-106a-5p,hsa-miR-106b-5p,hsa-miR-17-5p,hsa-miR-20a-5p,hsa-miR-20b-5p	1.65771e-06	5.1873e-05	21.0065
3:65018441|65050822//XLOC.132426.12	ENST00000300035	2588	46	56	20	hsa-miR-106a-5p,hsa-miR-106b-5p,hsa-miR-1273g-3p,hsa-miR-1304-3p,hsa-miR-17-5p,hsa-miR-20a-5p,hsa-miR-20b-5p,hsa-miR-372-3p,hsa-miR-373-3p,hsa-miR-378a-5p,hsa-miR-3934-5p,hsa-miR-4258,hsa-miR-4430,hsa-miR-4772-3p,hsa-miR-619-5p,hsa-miR-640,hsa-miR-6747-3p,hsa-miR-6807-5p,hsa-miR-6843-3p,hsa-miR-93-5p	4.47109e-23	3.27247e-20	20.0932
2:11566480|11576535//ENST00000234142	ENST00000245838	2588	12	5	2	hsa-miR-6888-5p,hsa-miR-7845-5p	0.000195637	0.00293254	86.2667
5:74813840|74841679//ENST00000510609	ENST00000428082	2588	11	9	2	hsa-miR-17-5p,hsa-miR-20b-5p	0.000581933	0.00698748	52.2828
20:51656938|51690819//ENST00000338821	ENST00000428082	2588	42	9	3	hsa-miR-17-5p,hsa-miR-20b-5p,hsa-miR-93-5p	0.000312151	0.00426811	20.5397
9:100016322|100022226//ENST00000262455	ENST00000428082	2588	9	9	2	hsa-miR-330-5p,hsa-miR-6515-3p	0.000382281	0.00501236	63.9012
5:108946130|108959347//ENST00000281092	ENST00000428082	2588	19	9	3	hsa-miR-17-5p,hsa-miR-20b-5p,hsa-miR-93-5p	2.74309e-05	0.00057724	45.4035
5:74834426|74841679//ENST00000389156	ENST00000428082	2588	12	9	2	hsa-miR-17-5p,hsa-miR-20b-5p	0.000697058	0.00803827	47.9259
7:130170400|130181719//ENST00000397622	ENST00000428082	2588	23	9	3	hsa-miR-17-5p,hsa-miR-20b-5p,hsa-miR-93-5p	4.9785e-05	0.000952611	37.5072
3:65018441|65050822//XLOC.132426.12	ENST00000428082	2588	46	9	4	hsa-miR-17-5p,hsa-miR-20b-5p,hsa-miR-330-5p,hsa-miR-93-5p	1.03277e-05	0.000251907	25.0048
7:130170400|130181719//ENST00000473456	ENST00000428082	2588	18	9	3	hsa-miR-17-5p,hsa-miR-20b-5p,hsa-miR-93-5p	2.31401e-05	0.000500372	47.9259
3:51416787|51418876//ENST00000335891	ENST00000428082	2588	13	9	2	hsa-miR-17-5p,hsa-miR-20b-5p	0.000822309	0.00913863	44.2393
10:7367649|7381949//ENST00000361972	ENST00000428082	2588	32	9	4	hsa-miR-17-5p,hsa-miR-20b-5p,hsa-miR-520d-3p,hsa-miR-93-5p	2.3262e-06	6.96724e-05	35.9444
7:130173632|130178527//ENST00000397622	ENST00000428082	2588	20	9	3	hsa-miR-17-5p,hsa-miR-20b-5p,hsa-miR-93-5p	3.22153e-05	0.00066103	43.1333
2:43726272|43738520//ENST00000282406	ENST00000355758	2588	19	20	3	hsa-miR-1236-3p,hsa-miR-1301-3p,hsa-miR-877-3p	0.000353703	0.00471303	20.4316
12:53719739|53722183//ENST00000262059	ENST00000422987	2588	25	5	2	hsa-miR-6501-5p,hsa-miR-892a	0.000880331	0.00963109	41.408
X:32216916|32310276//ENST00000357033	ENST00000247182	2588	7	73	4	hsa-miR-30c-1-3p,hsa-miR-30c-2-3p,hsa-miR-6731-5p,hsa-miR-8085	1.91475e-05	0.000426289	20.2583
X:32287529|32310276//ENST00000357033	ENST00000247182	2588	7	73	4	hsa-miR-30c-1-3p,hsa-miR-30c-2-3p,hsa-miR-6731-5p,hsa-miR-8085	1.91475e-05	0.000426289	20.2583
7:158901739|158906091//ENST00000407559	ENST00000605286	2588	7	52	3	hsa-miR-3064-5p,hsa-miR-6504-5p,hsa-miR-6783-3p	0.000253147	0.00360574	21.3297
1:70417937|70424416//ENST00000370938	ENST00000557126	2588	7	10	2	hsa-miR-193b-5p,hsa-miR-6855-5p	0.000279394	0.00390381	73.9429
7:5919849|5923962//ENST00000325974	ENST00000557126	2588	9	10	2	hsa-miR-3170,hsa-miR-6855-5p	0.000476988	0.00597324	57.5111
2:127989564|127989866//ENST00000259234	ENST00000557126	2588	19	10	3	hsa-miR-193b-5p,hsa-miR-3170,hsa-miR-6855-5p	3.90051e-05	0.000776297	40.8632
3:138263739|138274544//ENST00000466762	ENST00000557126	2588	7	10	2	hsa-miR-193b-5p,hsa-miR-6855-5p	0.000279394	0.00390381	73.9429
21:37472684|37496258//ENST00000338785	ENST00000509979	2588	31	15	5	hsa-miR-1343-5p,hsa-miR-27b-3p,hsa-miR-3198,hsa-miR-6126,hsa-miR-939-5p	4.86652e-07	1.77014e-05	27.828
4:9980592|9996941//ENST00000264784	ENST00000509979	2588	23	15	3	hsa-miR-1343-5p,hsa-miR-6763-5p,hsa-miR-939-5p	0.000260421	0.00368901	22.5043
21:37472684|37496258//ENST00000339659	ENST00000509979	2588	31	15	5	hsa-miR-1343-5p,hsa-miR-27b-3p,hsa-miR-3198,hsa-miR-6126,hsa-miR-939-5p	4.86652e-07	1.77014e-05	27.828
6:42650284|42652645//ENST00000372899	ENST00000367616	2588	11	27	4	hsa-miR-301b-5p,hsa-miR-4632-5p,hsa-miR-6735-5p,hsa-miR-6879-5p	2.95411e-06	8.57508e-05	34.8552
11:61271675|61274584//ENST00000301770	ENST00000367616	2588	32	27	7	hsa-miR-1207-5p,hsa-miR-4436b-3p,hsa-miR-4632-5p,hsa-miR-4763-3p,hsa-miR-6721-5p,hsa-miR-6735-5p,hsa-miR-6879-5p	1.64685e-08	8.70108e-07	20.9676
6:17507169|17513954//ENST00000229922	ENST00000367616	2588	12	27	5	hsa-miR-1207-5p,hsa-miR-4632-5p,hsa-miR-4763-3p,hsa-miR-6721-5p,hsa-miR-6879-5p	6.31156e-08	2.89113e-06	39.9383
5:32414969|32417792//ENST00000265069	ENST00000616551	2588	30	12	7	hsa-miR-378a-3p,hsa-miR-378b,hsa-miR-378c,hsa-miR-378d,hsa-miR-378e,hsa-miR-378f,hsa-miR-378h	1.01312e-11	1.06109e-09	50.3222
11:120476661|120477526//ENST00000356641	ENST00000616551	2588	13	12	5	hsa-miR-378a-3p,hsa-miR-378c,hsa-miR-378d,hsa-miR-378e,hsa-miR-378f	1.03868e-09	7.19222e-08	82.9487
14:102194938|102209862//ENST00000424963	ENST00000616551	2588	75	12	8	hsa-miR-378a-3p,hsa-miR-378b,hsa-miR-378c,hsa-miR-378d,hsa-miR-378e,hsa-miR-378f,hsa-miR-378h,hsa-miR-422a	1.54058e-10	1.272e-08	23.0044
[truncated: 63,536 more rows]
